# Supplementary material for: A proximity labeling method for protein–protein interactions on cell membrane
Source: Royal Society of Chemistry journal article supplement (doi:10.1039/d1sc06898a), 2022-01-01
Supplement: d1sc06898a1.pdf [file d1sc06898a1.pdf]

1 **A proximity labeling method for protein-protein interactions on cell**  
2 **membrane**

3 **SUPPLEMENTARY MATERIAL**

4 **Authors**

5 Qiongyu Li<sup>1</sup>, Yixuan Xie<sup>1</sup>, Rachel Rice<sup>1</sup>, Emanuel Maverakis<sup>2</sup>, Carlito B. Lebrilla<sup>1,3</sup>

6  
7 **Affiliations**

8 <sup>1</sup>Department of Chemistry, University of California Davis, Davis, California, USA.

9 <sup>2</sup>Department of Dermatology, School of Medicine, University of California Davis, Davis, California,  
10 USA.

11 <sup>3</sup>Department of Biochemistry, University of California Davis, Davis, California, USA.

12 Correspondence and requests for materials should be addressed to C.B.L. (email:  
13 [cblebrilla@ucdavis.edu](mailto:cblebrilla@ucdavis.edu))

14  
15 **Key Words**

16 Proximity labeling proteomics, antigen-antibody binding, protein-protein interaction, glycosylation

17

## 18 **METHODS**

19 **Cell culture.** Three human cell lines including PNT2, SKBR3, and Caco-2 were obtained from  
20 American Type Culture Collection (ATCC, Manassas, VA) and studied. All cell media were  
21 supplemented with 10% (v/v) fetal bovine serum (FBS), 100 U/mL penicillin and streptomycin  
22 (P/S), and non-essential amino acids and 2 mM L-glutamine, and were maintained in a humidified  
23 incubator at 37 °C with 5% CO<sub>2</sub>. Human normal prostate epithelium (immortalized with SV40)  
24 PNT2 cells were grown in Roswell Park Memorial Institute (RPMI) 1640 medium, human breast  
25 cancer SKBR3 cells were maintained in high-glucose (4.5g/L) Dulbecco's Modified Eagle Medium  
26 (DMEM), and human colon carcinoma Caco-2 cells were maintained in Eagle's Minimum  
27 Essential Medium (EMEM). All three cell lines were sub-cultured at 80% confluency. To obtain  
28 differentiated Caco-2 cells, Caco-2 cells were maintained for another 14 days after reaching full  
29 confluency.

30 **Modification of antibodies with DBCO-FeBABE.** Antibodies were conjugated to DBCO-  
31 FeBABE through their N-glycans. To cleave the terminus galactose, antibodies were incubated  
32 with galactosidase at 37 °C for 6-18 h. To further add the GalNAz groups to N-glycans, proteins  
33 were incubated with galactosyltransferase and UDP-GalNAz for 18 h at 30 °C. The DMSO  
34 solution of DBCO-FeBABE was then added to modified proteins for conjugation and the mixture  
35 was incubated at room temperature for 18 h. (**Figure 1a**, FeDBAb modification workflow) After  
36 each step, ultrafiltration was conducted to purify modified antibodies.

37 **Modification of antibodies with FeBABE.** Antibodies were modified with FeBABE using the  
38 method adapted from a previously described protocol.<sup>1,2</sup> For the modification, the antibody was  
39 incubated with FeBABE in the conjugation buffer (10 mM MOPS, 200 mM NaCl, 2 mM EDTA, 5%  
40 glycerol, pH 8.0) was maintained at 37 °C for 1 h, followed by the ultrafiltration for buffer exchange  
41 to storage buffer (10 mM Tris, 0.2 M KCl, 10 mM MgCl<sub>2</sub>, 0.1 mM EDTA, 1 mM DTT, 50% glycerol,  
42 pH 7.6). The modified antibody was maintained at -80 °C until cell treatment. (**Figure 1a**, FeAb

43 modification workflow). The content of free cysteine residues in antibodies (immunoglobulin  
44 gamma 1) which has been reported to be in the range of 0.1-1.1 mole/mole (free SH to IgG)<sup>3</sup> was  
45 set as an average of 0.5 mole/mole. Given that the ratio between the FeBABE and SH group is 1  
46 mole/mole, the FeBABE to antibody ratio was set as 0.5 mole/mole for modification.

47 **Treatment of cells.** Cells were kept at 4 °C and treated with modified antibodies overnight at  
48 90% confluency. Then H<sub>2</sub>O<sub>2</sub> was added to cells for 30 minutes (min) for oxidation. (**Figure 1b**) To  
49 quench the oxidation, the 10 mM Met-NH<sub>2</sub> was used to wash cells. For cell membrane  
50 glycosylation modification, 200 mM 3Fax-Peracetyl Neu5Ac or 100 mM kifunensine were  
51 administered to cells for three days. Cells were scraped and spin down to obtain cell pellets for  
52 cell membrane extraction and follow-up processes.

53 **Immunofluorescence.** Immunofluorescence was employed to validate the binding affinity of  
54 modified antibodies. Cells were seeded on glass bottomed FluoroDish™ cell culture dishes (WPI,  
55 FL) for imaging. After reaching 60% confluency, cells were fixed with 1 mL of 4%  
56 paraformaldehyde (Affymetrix, OH) for 10 min, permeabilized with 1 mL of 0.1% Triton X-100  
57 (Sigma-Aldrich, MO) for 5 min, and blocked for non-specific binding with 0.1 mL of 0.3 M glycine  
58 (Sigma-Aldrich, MO). After treatment of cells with modified or original antibodies with Alexa Fluor  
59 tags overnight, cells were stained for plasma membrane with the 1000-fold diluted CellMask™  
60 Orange or Deep Red Stain (Thermo Fisher Scientific), and for nuclei with 1.6 μM Hoechst 33342  
61 (Thermo Fisher Scientific, MA). Images were taken with the Leica TCS SP8 STED 3X Super-  
62 Resolution Confocal Microscope (Wetzlar, Germany) was used for imaging and results were  
63 analyzed with ImageJ.

64 **Cell membrane extraction.** Cell membrane was extracted with a sequential  
65 ultracentrifugation method adapted from an approach developed in another study. In brief, cells  
66 were first lysed on a cool rack using a probe sonicator (Qsonica, CT) for 25 seconds. The lysed  
67 cells were centrifuged for 10 min at 2,000 × g to separate membrane fractions from other fractions

68 containing nuclear, mitochondria and cellular debris and collect supernatant. After that, the  
69 supernatant was ultracentrifuged for 45 min at 200,000 × g and 4 °C to pelletize the plasma  
70 membrane. The plasma membrane pellet was washed further to remove remaining cytoplasm  
71 and endoplasmic reticulum residues with 500 µL of 0.2 M Na<sub>2</sub>CO<sub>3</sub> solution and 500 µL of water,  
72 through two rounds of ultracentrifugation under same conditions.

73 **Protein digestion.** Cell membrane proteins processed further for tryptic digestion. Proteins  
74 were first denatured in 8 M urea with sonication for 15 min, followed by reduction with 2 µL of  
75 dithiothreitol at 55 °C for 50 min, and alkylation with 4 µL of iodoacetamide (IAA) in the dark and  
76 at room temperature for 25 min. After dilution of urea concentration to less than 1 M with  
77 ammonium bicarbonate (NH<sub>4</sub>HCO<sub>3</sub>) solution, 3 µg of trypsin was used for digestion at 37 °C for  
78 18 h. Samples were further desalted with solid-phase extraction (SPE) C18 cartridges and  
79 vacuum dried using miVac (SP Scientific, PA) for MS analysis. For glycopeptide analysis, tryptic  
80 digested samples were enriched with iSPE®- HILIC cartridges (Nest Group, MA) and also dried  
81 with miVac for storage until analysis.

82 **Proteomic and glycoproteomic analysis with LC-MS/MS.** The desalted peptides or  
83 enriched glycopeptides were reconstituted with water and adjusted peptide concentration to 1  
84 µg/µL using Pierce™ Quantitative Colorimetric Peptide Assay kit. For proteomics or  
85 glycoproteomics analysis, around 1 µg of samples were separated with an Acclaim PepMap 100  
86 C18 column (3 µm, 0.075 mm × 250 mm) on an UltiMate WPS-3000RS nanoLC system at the  
87 300 nL/min of flow rate. A 180-min-gradient was used with solvent A containing 0.1% (v/v) formic  
88 acid (FA) in water and solvent B containing 90% (v/v) ACN and 0.1% (v/v) FA. Samples were  
89 ionized with a Nanospray Flex ion source at positive mode and analyzed with an Orbitrap Fusion  
90 Lumos Tribrid Mass spectrometer. The data-dependent acquisition (DDA) mode was employed,  
91 and the parameters are described in another study.<sup>4</sup> In brief, the m/z range of 350-3000 was used  
92 for MS1 scan, and precursors ions in the m/z range of 700-2000 with 2-6 charge states were

93 isolated for MS2 fragmentation. For MS2 fragmentation, fragments were generated with a step-  
94 wised high-energy collision dissociation (HCD) and analyzed with orbitrap analyzer.

95       **Label-free quantitative proteomic and glycoproteomic data analysis.** For data  
96 analysis, Byonic software (Protein Metrics, CA) was used for peptide and protein identification,  
97 using the human proteome database downloaded from Uniprot (**Supplementary Table VI**) as the  
98 database for searching. The specificity of the *in-silico* digestion was selected at C-Terminals of  
99 arginine and lysine for tryptic digestion with the restriction of a maximum of two missed cleavages  
100 for digested peptides. For precursors and fragments identification, mass tolerances were set as  
101 10 ppm and 20 ppm, respectively. To eliminate the false positive discoveries, 1% of the false  
102 discovery rate (FDR) was used. Several modifications at distinct amino acids were selected  
103 globally for peptide identification. Fixed modification carbamidomethylation was assigned at  
104 cysteine; variable modifications including the acetylation, deamidation, and methylation were  
105 assigned at the protein N-terminus, asparagine and glutamine, and lysine and arginine,  
106 respectively. Different types of modifications were selected for glycoproteomics and oxidative  
107 proteomics. An in-house developed N-glycan library (**Supplementary Table VII**) was used as  
108 glycan modifications which were assigned to asparagines for glycopeptide identification. For  
109 oxidized peptide identification, oxidation at 13 common amino acids (M, C, W, Y, F, H, L, I, R, V,  
110 T, P, and K) was selected as variable modifications. Five amino acids including M, C, W, Y, and  
111 F, were selected for double oxidation variable modification. Identified peptides with their  
112 corresponding proteins were exported as an excel file together with an MzIdentML file, which  
113 were used for protein quantitation in Skyline software.<sup>5</sup> Following data analysis of the extents of  
114 oxidation at site-specific and protein levels were conducted with R Studio with customized R  
115 scripts. The raw data and corresponding data searching results were uploaded to Pride database.  
116

117 **Determination of AAPL Values.** Extent of interactions reveal by oxidation was  
118 determined using the equation:

$$119 \quad AAPL = Q_{Protein} \times \log \frac{Q_{Protein}}{E_{Protein}}$$

120 where  $Q_{protein}$  and  $E_{protein}$  were defined as follows.

121

$$122 \quad Q_{Protein} = \frac{EPO_M}{EPO_{Ctrl}} \times Spectral\ Count_M$$

$$123 \quad E_{Protein} = \frac{Row\ Sum_{Protein} \times Column\ Sum_{Condition}}{Table\ Sum}$$

124 Here, EPO is the extent of protein oxidation, and it is defined as the following equation.

$$125 \quad EPO = \frac{\sum Intensity_{oxidized\ peptides}}{\sum Intensity_{all\ peptides}}$$

126 The equation was modified from analogous interactions using a protein-pull down procedure of a  
127 target protein and its interacting partners by Sardu *et al.*<sup>6</sup>. In those experiments, a protein was  
128 tagged and pulled down with activated beads using biotin-avidin technology. In the AAPL method  
129 the relationships between the target proteins and its interacting partners were determined based  
130 on the EPO combining with the spectral count of the oxidized protein.

## 131 **SUPPLEMENTARY INFORMATION**

### 132 **Generation of antibody probes**

133 The glycan modification was first performed on an IgG commercial protein standard and  
134 then on selected antibodies. To determine the extent of the azido modification, the glycans were  
135 released with PNGase F enzyme and subjected to nanoLC-MS/MS characterization. The total ion

136 chromatograms (TIC) of the released glycans from both modified and native IgG proteins are  
137 shown in **Figure S1(a)** and **(b)**. The unmodified IgG yielded the expected N-glycan profile with no  
138 azido-modified compounds. In the glycan-modified IgG, a number of azido-containing compounds  
139 were observed in the total ion chromatogram (TIC - peaks in dark blue). Further quantitation  
140 revealed that after modification, the GalNAz-containing compounds accounted for 50% of the total  
141 glycan abundances. Additionally, an alternative approach was employed to produce the antibody  
142 probe where the FeBABE was directly added through the reaction of the FeBABE reagent with  
143 free sulfhydryl groups on cysteines of the polypeptide backbone. The resulting antibody product  
144 contained the FeBABE probe as part of the polypeptide backbone (**FeAb**). The antibodies were  
145 not saturated with either type of probes (FeDBAb and FeAb). We examined the effect of saturation  
146 by increasing the amount of FeDBAb and FeAb substrates relative to the amount of starting  
147 antibody material (**Table S1**). The resulting antibody probes yielded varying amounts of oxidation  
148 (See main context).

149         To further examine the binding properties of the modified antibodies (**FeDBAb** and **FeAb**),  
150 immunofluorescence with confocal microscopy was conducted. Cells were treated with natural  
151 and modified antibodies and stained for plasma membrane (green color) and nuclear (blue color)  
152 for confocal imaging. For the validation of modified anti-ERBB2 antibody, the SKBR3 cell line with  
153 ERBB2 protein highly expressed was selected for imaging, which is known as a standard in vitro  
154 model for breast cancer.<sup>7</sup> The imaging of surface ERBB2 using original anti-ERBB2 antibody,  
155 modified anti-ERBB2-FeAb, and anti-ERBB2-FeDBAb are demonstrated in **Figure S2a-c**,  
156 respectively, and it was observed that the cell membrane was colocalized with both original and  
157 modified antibody probes. The staining pattern of the cell membrane with CellMask Orange stain  
158 was homogeneous throughout the membrane, while the antibody stain clustered in parts.

159

160

161

162

### 163 SUPPLEMENTARY FIGURES

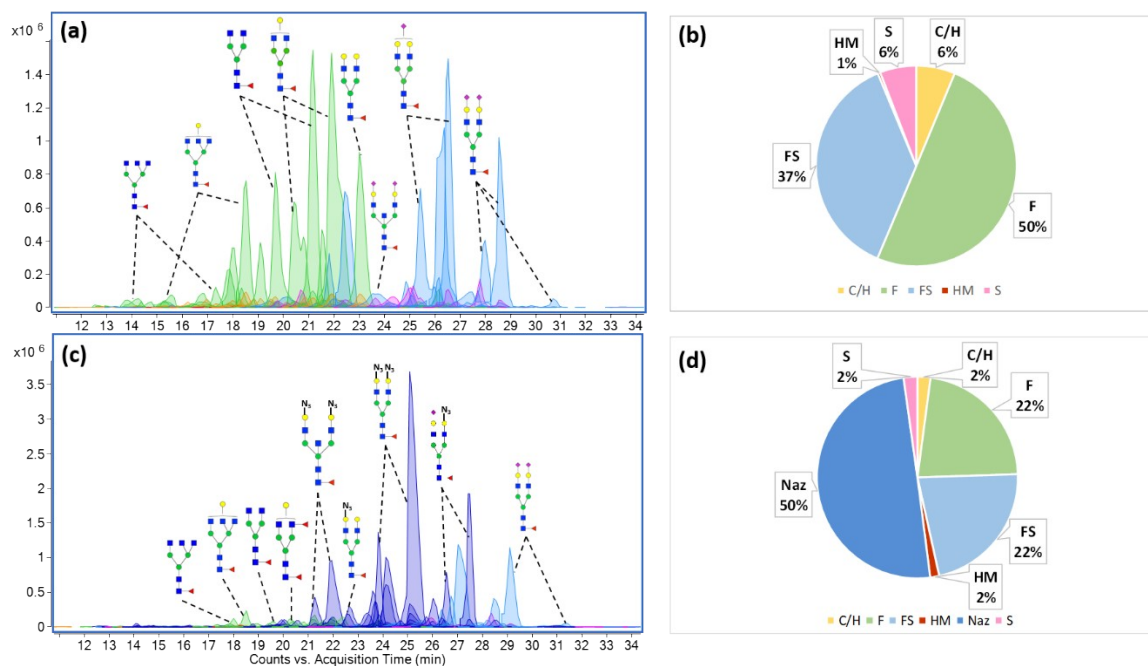

164

165 **Figure S1. The modification of antibody glycans with GalNAz.** a. The glycomic profile of  
166 unmodified IgG. Peaks of different types of glycans are color coded and tentative structures of N-  
167 glycans are assigned to peaks. b. The composition of different types of glycans. c. The glycomic  
168 profile of IgG modified with GalNAz. Peaks of GalNAz modified glycans are in dark purple. d. The  
169 composition of different types of glycans.



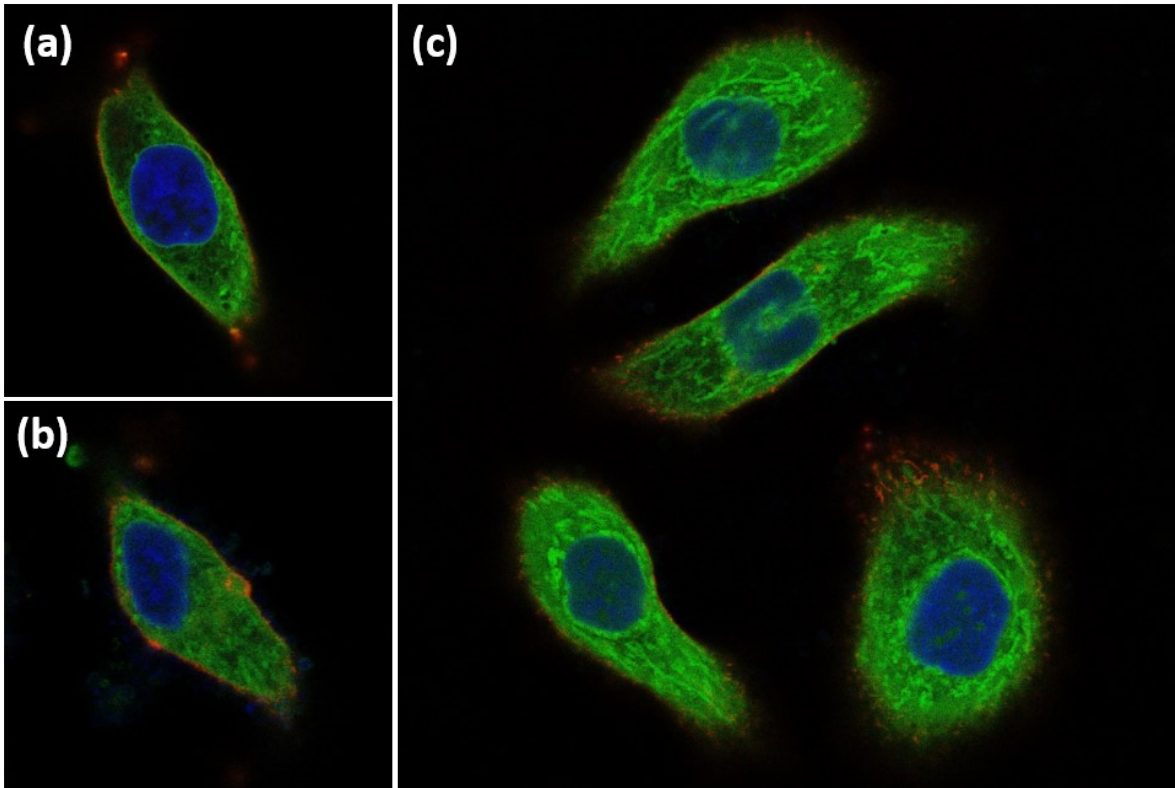

170

171 **Figure S2. The immunofluorescence of SKBR3 cells using anti-ERBB2 antibody.** a. The  
172 confocal imaging of ERBB2 with non-modified anti-ERBB2 antibody. b. The confocal imaging of  
173 ERBB2 with anti-ERBB2-FeAb. c. The confocal imaging of ERBB2 with anti-ERBB2-FeDBAb.  
174 (Color legend, red: CellMask™ Deep Red Stain for plasma membrane; blue: Hoechst 33342 for  
175 nuclei; green: Alexa Fluor 488 anti-ERBB2 antibody.

176

177

178

179

180

181

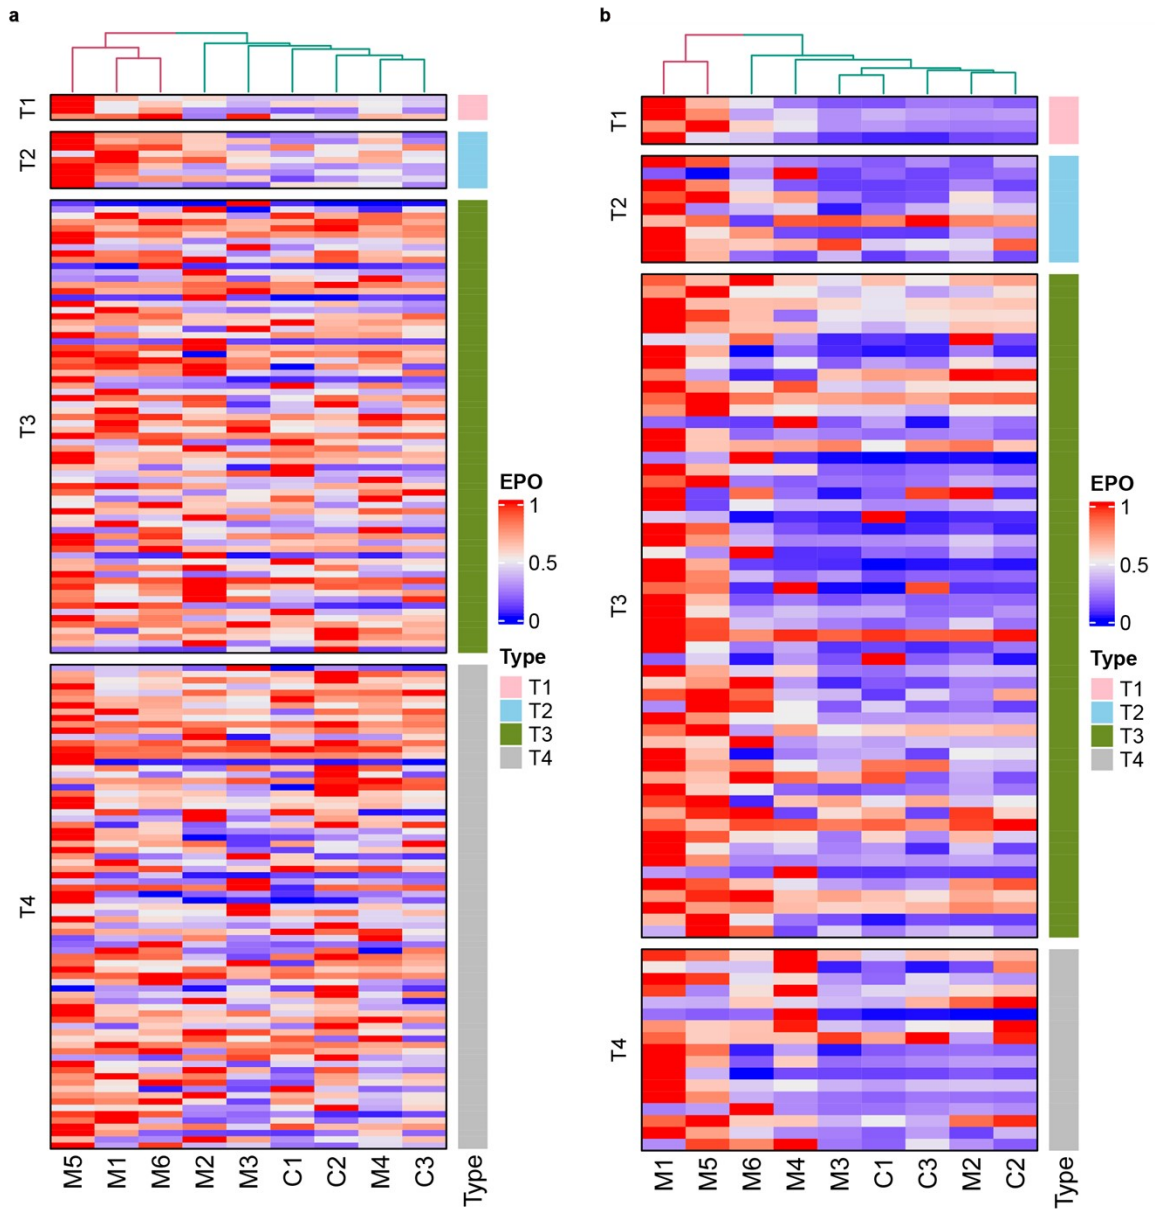

182

183 **Figure S3. The heatmaps of protein extent of oxidation under different conditions for AAPL**

184 **method optimization in a. PNT2 cells with modified anti-ATP1A1 antibody and b. SKBR3 cells**

185 **with modified anti-ERBB2 antibody. Proteins are clustered based on their STRING types.**

186 **Methods giving similar oxidation patterns across all the oxidized proteins are clustered together,**

187 **using the hierarchical clustering algorithm in R**

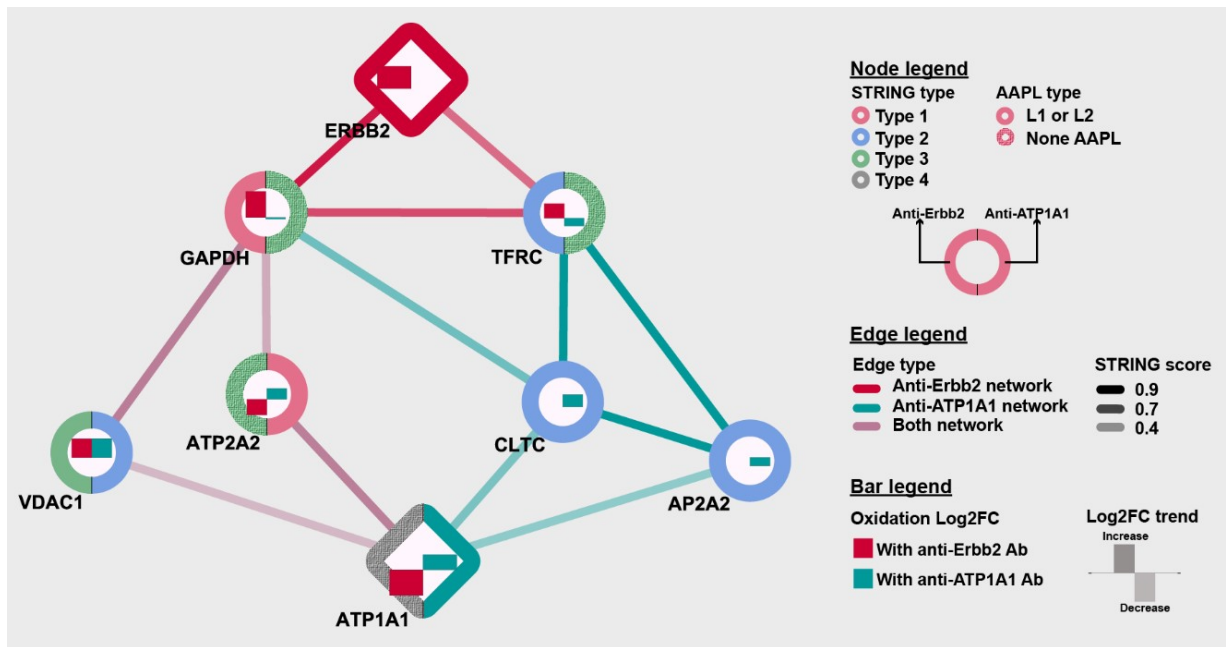

188

189 **Figure S4. Merged interaction network of ATP1A1 and ERBB2.** To demonstrate the STRING  
 190 connection of GAPDH and TFRC with ATP1A1 in ATP1A1 network, two more interactors of  
 191 ATP1A1 including CLTC and AP2A2 were also included in the merged network. In the merged  
 192 network, the node edge color represents the STRING types of each protein in ATP1A1 network  
 193 (right semi-circle) and ERBB2 network (left semi-circle). For identified AAML L1 or L2 interactor,  
 194 its node edge is represented with pattern, while node edge of non AAML interactor is represented  
 195 without pattern. Inside of each node, the EPOs of each protein in both networks were also  
 196 illustrated as a bar graph.

197

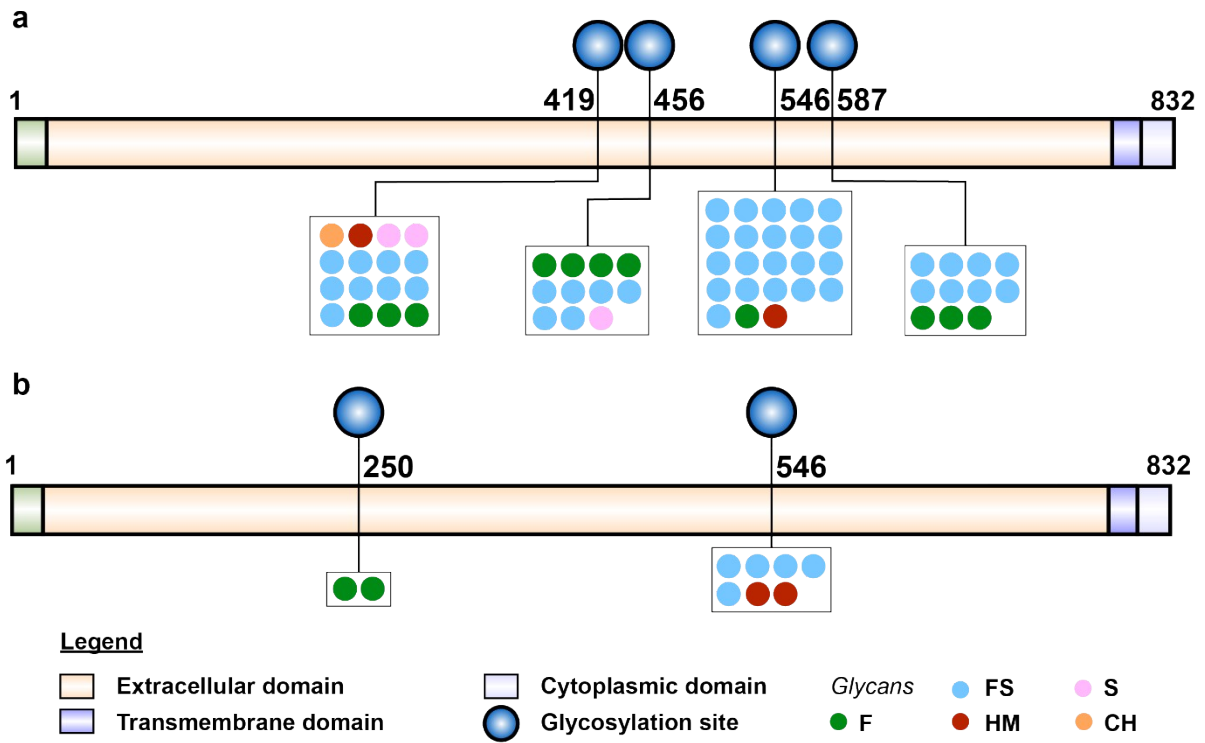

198

199 **Figure S5. Site specific glycosylation of LI-cadherin** in a. differentiated Caco-2 cells and b.  
 200 undifferentiated Caco-2 cells. Glycosylation sites are represented with blue circles and labeled  
 201 with site positions. The abundance of each type of glycan modification is demonstrated as the  
 202 number of colored circles beneath each site, representing the spectral count of each type of  
 203 glycosylation obtained from glycoproteomics results.

204

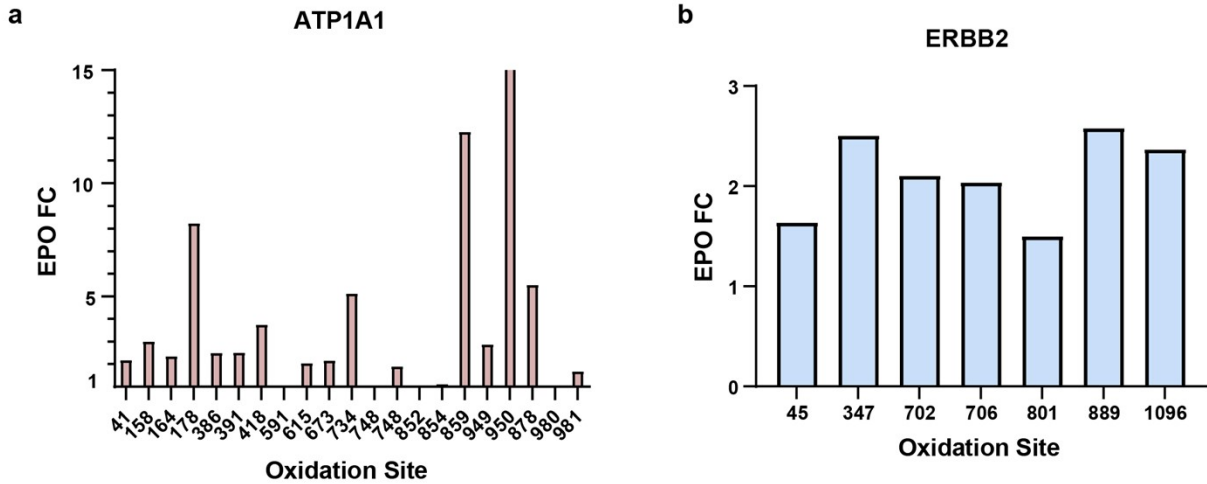

205

206 **Figure S6. Site specific extent of protein oxidation (EPO) of a. ATP1A1 and b. ERBB2.** The  
 207 fold change (FC) of EPO is generated with the M5 against the control. For ATP1A1, sites 878,  
 208 980, and 981 are located extracellular membrane domains. Both sites 878 and 981 are having  
 209 EPO FC values larger than 1.5. For ERBB2, sites 45 and 347 are located extracellular membrane  
 210 domain, and their EPO FC values are above 1.5.

211

212 **SUPPLEMENTARY TABLE**

| Conditions                              | Type of Ab    | Type of Fe(III) probe | Amount of Ab | Ratio of Ab:Fe(III) |
|-----------------------------------------|---------------|-----------------------|--------------|---------------------|
| C1                                      | /             | /                     | /            | /                   |
| C2                                      | Unmodified Ab | /                     | 10 µg        | /                   |
| C3 (H <sub>2</sub> O <sub>2</sub> only) | /             | /                     | /            | /                   |
| M1                                      | FeAb          | FeBABE                | 10 µg        | 2:1                 |
| M2                                      |               |                       | 10 µg        | 1:1                 |
| M3                                      |               |                       | 10 µg        | 1:2                 |
| M4                                      | FeDBAb        | DBCO-FeBABE           | 10 µg        | 1:5                 |
| M5                                      |               |                       | 20 µg        | 1:5                 |
| M6                                      |               |                       | 30 µg        | 1:5                 |

213

214 **Supplementary Table 1.** The details of reaction and control conditions of AAPL method.

215

216

## 217 REFERENCES

- 218 1 Li, Q., Xie, Y., Xu, G. & Lebrilla, C. B. Identification of potential sialic acid binding proteins on cell membrane by  
219 proximity chemical labeling. *Chemical Science* (2019).
- 220 2 Owens, J. T. *et al.* Mapping the  $\sigma^{70}$  subunit contact sites on *Escherichia coli* RNA polymerase  
221 with a  $\sigma^{70}$ -conjugated chemical protease. *Proceedings of the National Academy of Sciences* **95**, 6021-  
222 6026, doi:10.1073/pnas.95.11.6021 (1998).
- 223 3 Liu, H. & May, K. Disulfide bond structures of IgG molecules. *mAbs* **4**, 17-23, doi:10.4161/mabs.4.1.18347 (2012).
- 224 4 Li, Q., Xie, Y., Wong, M., Barboza, M. & Lebrilla, C. B. Comprehensive structural glycomic characterization of the  
225 glycoalyxes of cells and tissues. *Nature Protocols* **15**, 2668-2704 (2020).
- 226 5 MacLean, B. *et al.* Skyline: an open source document editor for creating and analyzing targeted proteomics  
227 experiments. *Bioinformatics* **26**, 966-968 (2010).
- 228 6 Sardu, M. E. *et al.* Topological scoring of protein interaction networks. *Nature communications* **10**, 1-14 (2019).
- 229 7 Holliday, D. L. & Speirs, V. Choosing the right cell line for breast cancer research. *Breast cancer research* **13**, 215  
230 (2011).

231
