# Supplementary material for: A proximity labeling method for protein–protein interactions on cell membrane
Source: Chem Sci. 2022 Apr 30;13(20):6028–38. doi: 10.1039/d1sc06898a (PMC9132088; doi:10.1039/d1sc06898a)
Supplement: SC-013-D1SC06898A-s002 [file SC-013-D1SC06898A-s002.xlsx]

## Sheet: STableIa
Protein	roundoxiseq	Protein_Description	Protein_Accession	Begin_Pos	M1	M2	M3	M4	M5	M6	C1	C3	C2	Gene	Oxidation	OxidationSite	Gene_name	STRING_type	AAPL_type
sp|O94973|AP2A2_HUMAN	YLALESM[+16]CTLASSEFSHEAVK	AP-2 complex subunit alpha-2 OS=Homo sapiens OX=9606 GN=AP2A2 PE=1 SV=2	O94973	345	0.0628778	0.0743343	0.00962119	0.0495211	0.0801402	0.0605454	0.0223857	0.019331	0.0393607	AP2A2	AP2A2_M[+16]352	352	AP2A2	T2	L2
sp|P05023|AT1A1_HUMAN	EVSM[+16]DDHK	Sodium/potassium-transporting ATPase subunit alpha-1 OS=Homo sapiens OX=9606 GN=ATP1A1 PE=1 SV=1	P05023	37	0.155552	0.145043	0.0583777	0.114415	0.255868	0.137084	0.179238	0.0946834	0.0779919	AT1A1	AT1A1_M[+16]41	41	ATP1A1	Bait	Bait
sp|P05023|AT1A1_HUMAN	IM[+16]ESFK	Sodium/potassium-transporting ATPase subunit alpha-1 OS=Homo sapiens OX=9606 GN=ATP1A1 PE=1 SV=1	P05023	156	0.16656	0.105619	0.0901107	0.112941	0.269569	0.0158247	0.088743	0.0810868	0.0993799	AT1A1	AT1A1_M[+16]158	158	ATP1A1	Bait	Bait
sp|P05023|AT1A1_HUMAN	NM[+16]VPQQALVIR	Sodium/potassium-transporting ATPase subunit alpha-1 OS=Homo sapiens OX=9606 GN=ATP1A1 PE=1 SV=1	P05023	162	0.245987	0.186578	0.168209	0.194087	0.465652	0.176423	0.219199	0.186757	0.190491	AT1A1	AT1A1_M[+16]164	164	ATP1A1	Bait	Bait
sp|P05023|AT1A1_HUMAN	MTVAHM[+16]WFDNQIHEADTTENQSGVSFDK	Sodium/potassium-transporting ATPase subunit alpha-1 OS=Homo sapiens OX=9606 GN=ATP1A1 PE=1 SV=1	P05023	385	0.20862	0.0992358	0.0656648	0.105912	0.114471	0.10797	0.0402643	0.0570141	0.0393319	AT1A1	AT1A1_M[+16]391	391	ATP1A1	Bait	Bait
sp|P05023|AT1A1_HUMAN	KADIGVAM[+16]GIAGSDVSK	Sodium/potassium-transporting ATPase subunit alpha-1 OS=Homo sapiens OX=9606 GN=ATP1A1 PE=1 SV=1	P05023	726	0.203186	0.0667868	0.0580559	0.0935398	0.254614	0.103176	0.0438127	0.0384324	0.0667233	AT1A1	AT1A1_M[+16]734	734	ATP1A1	Bait	Bait
sp|P05023|AT1A1_HUMAN	MY[+16]PLKPTWWFCAFPYSLLIFVYDEVRK	Sodium/potassium-transporting ATPase subunit alpha-1 OS=Homo sapiens OX=9606 GN=ATP1A1 PE=1 SV=1	P05023	979	0.420259	0.77125	0.500727	0.2045	0.338056	0.221597	0.111166	0.29198	0.198692	AT1A1	AT1A1_Y[+16]981	981	ATP1A1	Bait	Bait
sp|P05023|AT1A1_HUMAN	DM[+16]TSEQLDDILK	Sodium/potassium-transporting ATPase subunit alpha-1 OS=Homo sapiens OX=9606 GN=ATP1A1 PE=1 SV=1	P05023	671	0.376479	0.150152	0.153344	0.249571	0.45846	0.239618	0.20398	0.197773	0.234425	AT1A1	AT1A1_M[+16]673	673	ATP1A1	Bait	Bait
sp|P05023|AT1A1_HUMAN	LISMAYGQIGM[+32]IQALGGFFTYFVILAENGFLPIHLLGLR	Sodium/potassium-transporting ATPase subunit alpha-1 OS=Homo sapiens OX=9606 GN=ATP1A1 PE=1 SV=1	P05023	848	0.00466879	0.0317199	0.00583276	0.00238919	0.0407551	0.0136204	0.00456209	0.00374008	0.0016614	AT1A1	AT1A1_M[+32]859	859	ATP1A1	Bait	Bait
sp|P05023|AT1A1_HUMAN	LISMAYGQIGMIQALGGFFTYFVILAENGF[+32]LPIHLLGLR	Sodium/potassium-transporting ATPase subunit alpha-1 OS=Homo sapiens OX=9606 GN=ATP1A1 PE=1 SV=1	P05023	848	0.0117131	0.0444263	0.00777799	0.00086876	0.0322368	0.0126386	0.00990616	0.00554809	0.00210771	AT1A1	AT1A1_F[+32]878	878	ATP1A1	Bait	Bait
sp|P05023|AT1A1_HUMAN	LISM[+16]AYGQIGMIQALGGFFTYFVILAENGFLPIHLLGLR	Sodium/potassium-transporting ATPase subunit alpha-1 OS=Homo sapiens OX=9606 GN=ATP1A1 PE=1 SV=1	P05023	848	0.0142955	0.00834016	0.0502525	0.0271431	0.032168	0.00177751	0.00568116	0.026913	0.16715	AT1A1	AT1A1_M[+16]852	852	ATP1A1	Bait	Bait
sp|P05023|AT1A1_HUMAN	M[+16]TVAHMWFDNQIHEADTTENQSGVSFDK	Sodium/potassium-transporting ATPase subunit alpha-1 OS=Homo sapiens OX=9606 GN=ATP1A1 PE=1 SV=1	P05023	385	0.0582092	0.0448745	0.0131868	0.0201191	0.0429125	0.0312543	0.0178997	0.0167517	0.0169356	AT1A1	AT1A1_M[+16]386	386	ATP1A1	Bait	Bait
sp|P05023|AT1A1_HUMAN	NSVFQQGMK[+16]NKILIFGLFEETALAAFLSYCPGMGVALR	Sodium/potassium-transporting ATPase subunit alpha-1 OS=Homo sapiens OX=9606 GN=ATP1A1 PE=1 SV=1	P05023	941	0.430885	0.680494	0.953982	0.0284661	0.399828	0.286523	0.0097918	0	0.00676398	AT1A1	AT1A1_K[+16]950	950	ATP1A1	Bait	Bait
sp|P05023|AT1A1_HUMAN	VLGFCHLFLPDEQFPEGFQFDTDDVNFPIDNLCFVGLISM[+16]IDPPR	Sodium/potassium-transporting ATPase subunit alpha-1 OS=Homo sapiens OX=9606 GN=ATP1A1 PE=1 SV=1	P05023	551	0.0468832	0.153317	0.0167563	0.0628044	0.0663827	0.230415	0.0665123	0.0754128	0.0913983	AT1A1	AT1A1_M[+16]591	591	ATP1A1	Bait	Bait
sp|P05023|AT1A1_HUMAN	NSVFQQGM[+16]K	Sodium/potassium-transporting ATPase subunit alpha-1 OS=Homo sapiens OX=9606 GN=ATP1A1 PE=1 SV=1	P05023	941	0.335105	0.224906	0.126532	0.203223	0.464227	0.279971	0.140953	0.170176	0.174416	AT1A1	AT1A1_M[+16]949	949	ATP1A1	Bait	Bait
sp|P05023|AT1A1_HUMAN	LISMAY[+16]GQIGMIQALGGFFTYFVILAENGFLPIHLLGLR	Sodium/potassium-transporting ATPase subunit alpha-1 OS=Homo sapiens OX=9606 GN=ATP1A1 PE=1 SV=1	P05023	848	0.0503703	0.00975997	0.0284739	0.0214486	0.0378003	0.0204473	0.0285563	0.0335842	0.0386287	AT1A1	AT1A1_Y[+16]854	854	ATP1A1	Bait	Bait
sp|P05023|AT1A1_HUMAN	M[+16]SINAEEVVVGDLVEVK	Sodium/potassium-transporting ATPase subunit alpha-1 OS=Homo sapiens OX=9606 GN=ATP1A1 PE=1 SV=1	P05023	177	0.542868	0.0944148	0.0886344	0.15064	0.578477	0.0183522	0.077485	0.092646	0.0408798	AT1A1	AT1A1_M[+16]178	178	ATP1A1	Bait	Bait
sp|P05023|AT1A1_HUMAN	TSATW[+16]LALSR	Sodium/potassium-transporting ATPase subunit alpha-1 OS=Homo sapiens OX=9606 GN=ATP1A1 PE=1 SV=1	P05023	413	0.0743184	0.1153	0.0227061	0.0223182	0.0531644	0.0271708	0.0176204	0.0083571	0.0166256	AT1A1	AT1A1_W[+16]418	418	ATP1A1	Bait	Bait
sp|P05023|AT1A1_HUMAN	QAADM[+16]ILLDDNFASIVTGVEEGR	Sodium/potassium-transporting ATPase subunit alpha-1 OS=Homo sapiens OX=9606 GN=ATP1A1 PE=1 SV=1	P05023	743	0.103418	0.117742	0.0843392	0.0576919	0.125872	0.0780217	0.0443976	0.0653079	0.0881802	AT1A1	AT1A1_M[+16]748	748	ATP1A1	Bait	Bait
sp|P05023|AT1A1_HUMAN	M[+16]YPLKPTWWFCAFPYSLLIFVYDEVRK	Sodium/potassium-transporting ATPase subunit alpha-1 OS=Homo sapiens OX=9606 GN=ATP1A1 PE=1 SV=1	P05023	979	0.151764	0.0402728	0.0337479	0.10136	0.143904	0.158363	0.109073	0.189792	0.116842	AT1A1	AT1A1_M[+16]980	980	ATP1A1	Bait	Bait
sp|P05023|AT1A1_HUMAN	VIM[+16]VTGDHPITAK	Sodium/potassium-transporting ATPase subunit alpha-1 OS=Homo sapiens OX=9606 GN=ATP1A1 PE=1 SV=1	P05023	612	0.264062	0.341241	0.161122	0.217582	0.331583	0.23937	0.163166	0.134717	0.187621	AT1A1	AT1A1_M[+16]615	615	ATP1A1	Bait	Bait
sp|P05023|AT1A1_HUMAN	QAADM[+32]ILLDDNFASIVTGVEEGR	Sodium/potassium-transporting ATPase subunit alpha-1 OS=Homo sapiens OX=9606 GN=ATP1A1 PE=1 SV=1	P05023	743	0.0699691	0.0634587	0.0602075	0.0448111	0.0660757	0.0545075	0.0747084	0.066837	0.0647479	AT1A1	AT1A1_M[+32]748	748	ATP1A1	Bait	Bait
sp|P16615|AT2A2_HUMAN	NAENAIEALKEYEPEM[+16]GK	Sarcoplasmic/endoplasmic reticulum calcium ATPase 2 OS=Homo sapiens OX=9606 GN=ATP2A2 PE=1 SV=1	P16615	110	0.168399	0.128836	0.157305	0.145488	0.336073	0.356678	0.220551	0.10772	0.0831831	AT2A2	AT2A2_M[+16]126	126	ATP2A2	T1	L1
sp|P16615|AT2A2_HUMAN	NM[+16]LFSGTNIAAGK	Sarcoplasmic/endoplasmic reticulum calcium ATPase 2 OS=Homo sapiens OX=9606 GN=ATP2A2 PE=1 SV=1	P16615	205	0.186503	0.215999	0.13487	0.171537	0.343786	0.207335	0.24843	0.161501	0.165562	AT2A2	AT2A2_M[+16]207	207	ATP2A2	T1	L1
sp|P16615|AT2A2_HUMAN	SM[+16]SVYCTPNKPSR	Sarcoplasmic/endoplasmic reticulum calcium ATPase 2 OS=Homo sapiens OX=9606 GN=ATP2A2 PE=1 SV=1	P16615	492	0.201718	0.086844	0.104548	0.173734	0.39033	0.191927	0.174578	0.135501	0.18014	AT2A2	AT2A2_M[+16]494	494	ATP2A2	T1	L1
sp|P16615|AT2A2_HUMAN	TGTLTTNQM[+16]SVCR	Sarcoplasmic/endoplasmic reticulum calcium ATPase 2 OS=Homo sapiens OX=9606 GN=ATP2A2 PE=1 SV=1	P16615	352	0.833967	0.132353	0.116408	0.144426	0.246913	0.758165	0.0172273	0.115555	0.873185	AT2A2	AT2A2_M[+16]361	361	ATP2A2	T1	L1
sp|P16615|AT2A2_HUMAN	IVEFLQSFDEITAM[+16]TGDGVNDAPALK	Sarcoplasmic/endoplasmic reticulum calcium ATPase 2 OS=Homo sapiens OX=9606 GN=ATP2A2 PE=1 SV=1	P16615	685	0.454316	0.0722111	0.0192732	0.0829048	0.101665	0.057036	0.0630602	0.0608406	0.138248	AT2A2	AT2A2_M[+16]699	699	ATP2A2	T1	L1
sp|P16615|AT2A2_HUMAN	IRDEM[+16]VATEQER	Sarcoplasmic/endoplasmic reticulum calcium ATPase 2 OS=Homo sapiens OX=9606 GN=ATP2A2 PE=1 SV=1	P16615	234	0.0195381	0.0101072	0.0668285	0.0285089	0.151841	0.0472541	0.102695	0.0344909	0.0401432	AT2A2	AT2A2_M[+16]239	239	ATP2A2	T1	L1
sp|P16615|AT2A2_HUMAN	M[+16]NVFDTELK	Sarcoplasmic/endoplasmic reticulum calcium ATPase 2 OS=Homo sapiens OX=9606 GN=ATP2A2 PE=1 SV=1	P16615	451	0.036622	0.13848	0.110185	0.136501	0.268356	0.165	0.150753	0.110751	0.111355	AT2A2	AT2A2_M[+16]452	452	ATP2A2	T1	L1
sp|P16615|AT2A2_HUMAN	TASEM[+16]VLADDNFSTIVAAVEEGR	Sarcoplasmic/endoplasmic reticulum calcium ATPase 2 OS=Homo sapiens OX=9606 GN=ATP2A2 PE=1 SV=1	P16615	727	0.142988	0.143052	0.147973	0.190646	0.311294	0.200657	0.143038	0.178809	0.204785	AT2A2	AT2A2_M[+16]732	732	ATP2A2	T1	L1
sp|P16615|AT2A2_HUMAN	VIM[+16]ITGDNK	Sarcoplasmic/endoplasmic reticulum calcium ATPase 2 OS=Homo sapiens OX=9606 GN=ATP2A2 PE=1 SV=1	P16615	619	0.0897592	0.105215	0.131991	0.190089	0.0778919	0.116446	0.135304	0.0783721	0.237548	AT2A2	AT2A2_M[+16]622	622	ATP2A2	T1	L1
sp|P16615|AT2A2_HUMAN	EEM[+16]HLEDSANFIK	Sarcoplasmic/endoplasmic reticulum calcium ATPase 2 OS=Homo sapiens OX=9606 GN=ATP2A2 PE=1 SV=1	P16615	572	0.159883	0.201362	0.127148	0.163841	0.320031	0.16344	0.198407	0.125457	0.177703	AT2A2	AT2A2_M[+16]575	575	ATP2A2	T1	L1
sp|P16615|AT2A2_HUMAN	KAEIGIAM[+16]GSGTAVAK	Sarcoplasmic/endoplasmic reticulum calcium ATPase 2 OS=Homo sapiens OX=9606 GN=ATP2A2 PE=1 SV=1	P16615	711	0.440424	0.482976	0.259316	0.413125	0.5851	0.588246	0.492372	0.387786	0.508688	AT2A2	AT2A2_M[+16]719	719	ATP2A2	T1	L1
sp|P16615|AT2A2_HUMAN	M[+16]FILDR	Sarcoplasmic/endoplasmic reticulum calcium ATPase 2 OS=Homo sapiens OX=9606 GN=ATP2A2 PE=1 SV=1	P16615	365	0.10334	0.0145209	0.117225	0.0747188	0.00786106	0.0593538	0.184682	0.0058936	0.16974	AT2A2	AT2A2_M[+16]366	366	ATP2A2	T1	L1
sp|P16615|AT2A2_HUMAN	IVEFLQSF[+16]DEITAMTGDGVNDAPALKK	Sarcoplasmic/endoplasmic reticulum calcium ATPase 2 OS=Homo sapiens OX=9606 GN=ATP2A2 PE=1 SV=1	P16615	685	0.0836112	0.108059	0.0691692	0.16574	0.0902116	0.0508678	0.150817	0.0256763	0.0628779	AT2A2	AT2A2_F[+16]693	693	ATP2A2	T1	L1
sp|P16615|AT2A2_HUMAN	ISLPVILM[+16]DETLK	Sarcoplasmic/endoplasmic reticulum calcium ATPase 2 OS=Homo sapiens OX=9606 GN=ATP2A2 PE=1 SV=1	P16615	971	0.014523	0.0347987	0.00706966	0.105166	0.106607	0.0599093	0.0514434	0.071781	0.046314	AT2A2	AT2A2_M[+16]979	979	ATP2A2	T1	L1
sp|P16615|AT2A2_HUMAN	AM[+16]GVVVATGVNTEIGK	Sarcoplasmic/endoplasmic reticulum calcium ATPase 2 OS=Homo sapiens OX=9606 GN=ATP2A2 PE=1 SV=1	P16615	218	0.238486	0.354488	0.211432	0.403599	0.630611	0.372199	0.28881	0.337319	0.214544	AT2A2	AT2A2_M[+16]220	220	ATP2A2	T1	L1
sp|P16615|AT2A2_HUMAN	EW[+32]GSGSDTLR	Sarcoplasmic/endoplasmic reticulum calcium ATPase 2 OS=Homo sapiens OX=9606 GN=ATP2A2 PE=1 SV=1	P16615	549	0.129312	0.127854	0.0698219	0.106307	0.122283	0.157543	0.0857962	0.110252	0.155073	AT2A2	AT2A2_W[+32]551	551	ATP2A2	T1	L1
sp|P16615|AT2A2_HUMAN	EEMH[+16]LEDSANFIK	Sarcoplasmic/endoplasmic reticulum calcium ATPase 2 OS=Homo sapiens OX=9606 GN=ATP2A2 PE=1 SV=1	P16615	572	0.117654	0.0496033	0.0896067	0.0314243	0.0326906	0.11039	0.115622	0.0439114	0.0489747	AT2A2	AT2A2_H[+16]576	576	ATP2A2	T1	L1
sp|P20020|AT2B1_HUMAN	HLDACETM[+16]GNATAICSDK	Plasma membrane calcium-transporting ATPase 1 OS=Homo sapiens OX=9606 GN=ATP2B1 PE=1 SV=4	P20020	458	0.485862	0.186136	0.155749	0.239117	0.48273	0.403169	0.106044	0.190836	0.147822	AT2B1	AT2B1_M[+16]466	466	ATP2B1	T1	L1
sp|P21796|VDAC1_HUMAN	EHINLGCDMDF[+16]DIAGPSIR	Voltage-dependent anion-selective channel protein 1 OS=Homo sapiens OX=9606 GN=VDAC1 PE=1 SV=2	P21796	120	0.574979	0.17088	0.154012	0.147562	0.326501	0.423896	0.0383817	0.0225966	0.0157587	VDAC1	VDAC1_F[+16]131	131	VDAC1	T2	L1
sp|P21796|VDAC1_HUMAN	GALVLGYEGWLAGYQM[+16]NFETAK	Voltage-dependent anion-selective channel protein 1 OS=Homo sapiens OX=9606 GN=VDAC1 PE=1 SV=2	P21796	139	0.0652	0.0334384	0.0590294	0.0692624	0.0916063	0.0961989	0.0217947	0.0162448	0.0179594	VDAC1	VDAC1_M[+16]155	155	VDAC1	T2	L1
sp|P21796|VDAC1_HUMAN	W[+32]TEYGLTFTEK	Voltage-dependent anion-selective channel protein 1 OS=Homo sapiens OX=9606 GN=VDAC1 PE=1 SV=2	P21796	63	0.0870173	0.0734461	0.0802087	0.0763622	0.0959298	0.0864231	0.0539051	0.0595838	0.06372	VDAC1	VDAC1_W[+32]64	64	VDAC1	T2	L1
sp|P21796|VDAC1_HUMAN	GALVLGYEGWLAGY[+16]QMNFETAK	Voltage-dependent anion-selective channel protein 1 OS=Homo sapiens OX=9606 GN=VDAC1 PE=1 SV=2	P21796	139	0.0797789	0.115199	0.0906071	0.0366201	0.0941801	0.0621081	0.0147022	0.00776646	0.0151981	VDAC1	VDAC1_Y[+16]153	153	VDAC1	T2	L1
sp|P22695|QCR2_HUMAN	GDVDILMEF[+16]LLNVTTAPEFR	Cytochrome b-c1 complex subunit 2, mitochondrial OS=Homo sapiens OX=9606 GN=UQCRC2 PE=1 SV=3	P22695	127	0.0702845	0.443551	0.0242417	0.191388	0.204702	0.100233	0.71282	0.216605	0.153327	QCR2	QCR2_F[+16]136	136	UQCRC2	T2	OUT
sp|P22695|QCR2_HUMAN	SM[+16]AASGNLGHTPFVDEL	Cytochrome b-c1 complex subunit 2, mitochondrial OS=Homo sapiens OX=9606 GN=UQCRC2 PE=1 SV=3	P22695	436	0.226471	0.195783	0.112555	0.218495	0.508828	0.267404	0.161136	0.144426	0.202765	QCR2	QCR2_M[+16]438	438	UQCRC2	T2	OUT
sp|P22695|QCR2_HUMAN	ENM[+16]AYTVECLR	Cytochrome b-c1 complex subunit 2, mitochondrial OS=Homo sapiens OX=9606 GN=UQCRC2 PE=1 SV=3	P22695	116	0.0553745	0.000206774	0.0104533	0.0379359	0.00998753	0.0911017	0.0322326	0.265052	0.0834219	QCR2	QCR2_M[+16]119	119	UQCRC2	T2	OUT
sp|P22695|QCR2_HUMAN	M[+16]ALIGLGVSHPVLK	Cytochrome b-c1 complex subunit 2, mitochondrial OS=Homo sapiens OX=9606 GN=UQCRC2 PE=1 SV=3	P22695	217	0.0894052	0.0630047	0.0291903	0.0244004	0.092033	0.0804996	0.0500765	0.061953	0.0293403	QCR2	QCR2_M[+16]218	218	UQCRC2	T2	OUT
sp|P22695|QCR2_HUMAN	QVAEQFLNM[+16]R	Cytochrome b-c1 complex subunit 2, mitochondrial OS=Homo sapiens OX=9606 GN=UQCRC2 PE=1 SV=3	P22695	231	0.210696	0.0926538	0.0731842	0.0891827	0.236043	0.214839	0.254717	0.157032	0.0418739	QCR2	QCR2_M[+16]240	240	UQCRC2	T2	OUT
sp|P35232|PHB_HUMAN	GVQDIVVGEGTHFLIPW[+32]VQKPIIFDCR	Prohibitin OS=Homo sapiens OX=9606 GN=PHB PE=1 SV=1	P35232	43	0.00370188	0.0029559	0.00255018	0.00307776	0.00171602	0.00242647	0.00130177	0.00246993	0.00260184	PHB	PHB_W[+32]60	60	PHB	T2	OUT
sp|P45880|VDAC2_HUMAN	W[+32]CEYGLTFTEK	Voltage-dependent anion-selective channel protein 2 OS=Homo sapiens OX=9606 GN=VDAC2 PE=1 SV=2	P45880	74	0.260035	0.0924294	0.0904975	0.0754514	0.159405	0.0890671	0.0683383	0.0464052	0.060011	VDAC2	VDAC2_W[+32]75	75	VDAC2	T2	L2
sp|P50990|TCPQ_HUMAN	GEENLM[+16]DAQVK	T-complex protein 1 subunit theta OS=Homo sapiens OX=9606 GN=CCT8 PE=1 SV=4	P50990	270	0.215357	0.079637	0.0951065	0.0649064	0.167813	0.14627	0.0613557	0.0464608	0.0248716	TCPQ	TCPQ_M[+16]276	276	CCT8	T2	L1
sp|P50990|TCPQ_HUMAN	YNIM[+16]LVR	T-complex protein 1 subunit theta OS=Homo sapiens OX=9606 GN=CCT8 PE=1 SV=4	P50990	307	0.298216	0.167344	0.38032	0.164458	0.365914	0.156607	0.0443193	0.101421	0.162884	TCPQ	TCPQ_M[+16]311	311	CCT8	T2	L1
sp|P50990|TCPQ_HUMAN	MIVMASH[+16]MQEQEVGDGTNFVLVFAGALLELAEELLR	T-complex protein 1 subunit theta OS=Homo sapiens OX=9606 GN=CCT8 PE=1 SV=4	P50990	84	0.143391	0.0477175	0.890033	0.0350856	0.149579	0.185303	0.0699366	0.16203	0.00576123	TCPQ	TCPQ_H[+16]91	91	CCT8	T2	L1
sp|P50990|TCPQ_HUMAN	MIVMASHM[+16]QEQEVGDGTNFVLVFAGALLELAEELLR	T-complex protein 1 subunit theta OS=Homo sapiens OX=9606 GN=CCT8 PE=1 SV=4	P50990	84	0.150136	0.592364	0.0982324	0.145984	0.201385	0.0679737	0.183781	0.27965	0.113884	TCPQ	TCPQ_M[+16]92	92	CCT8	T2	L1
sp|P55084|ECHB_HUMAN	AM[+16]DSDWFAENYMGR	Trifunctional enzyme subunit beta, mitochondrial OS=Homo sapiens OX=9606 GN=HADHB PE=1 SV=3	P55084	391	0.758004	0.533464	0.535277	0.429	0.721026	0.551134	0.384182	0.322219	0.30166	ECHB	ECHB_M[+16]393	393	HADHB	T1	OUT
sp|Q00610|CLH1_HUMAN	AFM[+16]TADLPNELIELLEK	Clathrin heavy chain 1 OS=Homo sapiens OX=9606 GN=CLTC PE=1 SV=5	Q00610	993	0.137009	0.0496663	0.0200551	0.0704882	0.132045	0.0539396	0.0338044	0.0412381	0.0510911	CLH1	CLH1_M[+16]996	996	CLTC	T2	L1
sp|Q00610|CLH1_HUMAN	LLEM[+16]NLMHAPQVADAILGNQMFTHYDR	Clathrin heavy chain 1 OS=Homo sapiens OX=9606 GN=CLTC PE=1 SV=5	Q00610	583	0.0505632	0.104469	0.152204	0.0190746	0.0823214	0.0349598	0.0446794	0.0521345	0.0458126	CLH1	CLH1_M[+16]587	587	CLTC	T2	L1
sp|Q00610|CLH1_HUMAN	VVGAM[+16]QLYSVDR	Clathrin heavy chain 1 OS=Homo sapiens OX=9606 GN=CLTC PE=1 SV=5	Q00610	176	0.290035	0.0097404	0.0349857	0.0501672	0.317647	0.187476	0.0771333	0.063263	0.0865483	CLH1	CLH1_M[+16]181	181	CLTC	T2	L1
sp|Q00610|CLH1_HUMAN	DAM[+16]QYASESKDTELAEELLQWFLQEEK	Clathrin heavy chain 1 OS=Homo sapiens OX=9606 GN=CLTC PE=1 SV=5	Q00610	1535	0.304112	0.29144	0.0412209	0.232374	0.333312	0.0960078	0.0423706	0.0465964	0.0958045	CLH1	CLH1_M[+16]1538	1538	CLTC	T2	L1
sp|Q00610|CLH1_HUMAN	RPISADSAIM[+16]NPASK	Clathrin heavy chain 1 OS=Homo sapiens OX=9606 GN=CLTC PE=1 SV=5	Q00610	63	0.17343	0.0605801	0.0413234	0.0646791	0.172935	0.0086379	0.0677544	0.0767697	0.087496	CLH1	CLH1_M[+16]73	73	CLTC	T2	L1
sp|Q00610|CLH1_HUMAN	LLEMNLMHAP[+16]QVADAILGNQMFTHYDR	Clathrin heavy chain 1 OS=Homo sapiens OX=9606 GN=CLTC PE=1 SV=5	Q00610	583	0.659071	0.247563	0.186414	0.430835	0.66375	0.246104	0.194629	0.23505	0.392937	CLH1	CLH1_P[+16]593	593	CLTC	T2	L1
sp|Q00610|CLH1_HUMAN	ECF[+16]GACLFTCYDLLRPDVVLETAWR	Clathrin heavy chain 1 OS=Homo sapiens OX=9606 GN=CLTC PE=1 SV=5	Q00610	1563	0.257178	0.182317	0.208435	0.263311	0.431987	0.148817	0.0647084	0.0751258	0.087196	CLH1	CLH1_F[+16]1566	1566	CLTC	T2	L1
sp|Q00610|CLH1_HUMAN	HNIMDFAMPYFIQVM[+16]K	Clathrin heavy chain 1 OS=Homo sapiens OX=9606 GN=CLTC PE=1 SV=5	Q00610	1588	0.291473	0.129074	0.160524	0.197066	0.377904	0.180001	0.113784	0.147389	0.18723	CLH1	CLH1_M[+16]1603	1603	CLTC	T2	L1
sp|Q00610|CLH1_HUMAN	TLQIFNIEM[+16]K	Clathrin heavy chain 1 OS=Homo sapiens OX=9606 GN=CLTC PE=1 SV=5	Q00610	86	0.201011	0.131944	0.175173	0.152293	0.225171	0.16664	0.103107	0.0957732	0.131612	CLH1	CLH1_M[+16]95	95	CLTC	T2	L1
sp|Q00610|CLH1_HUMAN	GYFEELITM[+16]LEAALGLER	Clathrin heavy chain 1 OS=Homo sapiens OX=9606 GN=CLTC PE=1 SV=5	Q00610	1293	0.345344	0.307538	0.138698	0.284091	0.381929	0.267356	0.269761	0.261276	0.431191	CLH1	CLH1_M[+16]1302	1302	CLTC	T2	L1
sp|Q00610|CLH1_HUMAN	VGY[+32]TPDWIFLLR	Clathrin heavy chain 1 OS=Homo sapiens OX=9606 GN=CLTC PE=1 SV=5	Q00610	507	0.0421166	0.0358768	0.0339817	0.0446297	0.0440493	0.053539	0.0112784	0.0213681	0.0289153	CLH1	CLH1_Y[+32]510	510	CLTC	T2	L1
sp|Q14573|ITPR3_HUMAN	AILLPMDLDAH[+16]ISSMLSSGASCAAAAQR	Inositol 1,4,5-trisphosphate receptor type 3 OS=Homo sapiens OX=9606 GN=ITPR3 PE=1 SV=2	Q14573	1536	0.186505	0.0744498	0.094613	0.202535	0.213926	0.183285	0.119555	0.0663075	0.124372	ITPR3	ITPR3_H[+16]1547	1547	ITPR3	T2	L1
sp|Q14573|ITPR3_HUMAN	AM[+16]SLVSNEGEGEQNEIR	Inositol 1,4,5-trisphosphate receptor type 3 OS=Homo sapiens OX=9606 GN=ITPR3 PE=1 SV=2	Q14573	2606	0.335741	0.0967972	0.310293	0.155983	0.41625	0.15346	0.0129478	0.034289	0.0212354	ITPR3	ITPR3_M[+16]2608	2608	ITPR3	T2	L1
sp|Q14573|ITPR3_HUMAN	F[+16]ANTMEFVEDYLNNVVSEAVPFANEEK	Inositol 1,4,5-trisphosphate receptor type 3 OS=Homo sapiens OX=9606 GN=ITPR3 PE=1 SV=2	Q14573	829	0.0631043	0.0214079	0.00963099	0.0933212	0.0468807	0.052322	0.00777653	0.0268392	0.013541	ITPR3	ITPR3_F[+16]830	830	ITPR3	T2	L1
sp|Q14573|ITPR3_HUMAN	LQHAAQM[+16]EQK	Inositol 1,4,5-trisphosphate receptor type 3 OS=Homo sapiens OX=9606 GN=ITPR3 PE=1 SV=2	Q14573	92	0.332378	0.144887	0.121969	0.0171837	0.287501	0.182228	0.00754782	0.0401662	0.0053187	ITPR3	ITPR3_M[+16]99	99	ITPR3	T2	L1
sp|Q14573|ITPR3_HUMAN	YGSVIQLLHM[+16]K	Inositol 1,4,5-trisphosphate receptor type 3 OS=Homo sapiens OX=9606 GN=ITPR3 PE=1 SV=2	Q14573	117	0.185932	0.317545	0.0507391	0.0391467	0.221086	0.306274	0	0.24797	0.0979791	ITPR3	ITPR3_M[+16]127	127	ITPR3	T2	L1
sp|Q9H0U4|RAB1B_HUMAN	QW[+32]LQEIDR	Ras-related protein Rab-1B OS=Homo sapiens OX=9606 GN=RAB1B PE=1 SV=1	Q9H0U4	100	0.0652	0.0774535	0.0199759	0.0595678	0.0641256	0.0701426	0.0486658	0.0560374	0.0755776	RAB1B	RAB1B_W[+32]102	102	RAB1B	T2	OUT
sp|Q9H0U4|RAB1B_HUMAN	NATNVEQAFMTM[+16]AAEIK	Ras-related protein Rab-1B OS=Homo sapiens OX=9606 GN=RAB1B PE=1 SV=1	Q9H0U4	153	0.107181	0.0981547	0.079083	0.115494	0.30839	0.0798287	0.103373	0.100595	0.109513	RAB1B	RAB1B_M[+16]165	165	RAB1B	T2	OUT
sp|Q9H0U4|RAB1B_HUMAN	M[+16]GPGAASGGERPNLK	Ras-related protein Rab-1B OS=Homo sapiens OX=9606 GN=RAB1B PE=1 SV=1	Q9H0U4	172	0.0308009	0.0123744	0.0114363	0.139643	0.327358	0.0854549	0.138051	0.0255009	0.191278	RAB1B	RAB1B_M[+16]173	173	RAB1B	T2	OUT
sp|O14653|GOSR2_HUMAN	QVHEIQSCM[+16]GR	Golgi SNAP receptor complex member 2 OS=Homo sapiens OX=9606 GN=GOSR2 PE=1 SV=2	O14653	10	0.0236904	0.00507207	0.70215	0.00511737	0.0897623	0.0262561	0.0603448	0.0198751	0.00200219	GOSR2	GOSR2_M[+16]19	19	GOSR2	T3	L1
sp|O15258|RER1_HUMAN	LGQIYQSW[+32]LDK	Protein RER1 OS=Homo sapiens OX=9606 GN=RER1 PE=1 SV=1	O15258	24	0.0921427	0.171993	0.00280556	0.00913537	0.0456276	0.0661694	0.0819594	0.0835519	0.0573599	RER1	RER1_W[+32]32	32	RER1	T3	OUT
sp|O43169|CYB5B_HUMAN	ELW[+32]LVIHGR	Cytochrome b5 type B OS=Homo sapiens OX=9606 GN=CYB5B PE=1 SV=3	O43169	39	0.0239637	0.027863	0.0196104	0.0291976	0.0225781	0.0312087	0.0192101	0.0193703	0.0287032	CYB5B	CYB5B_W[+32]42	42	CYB5B	T3	OUT
sp|O95406|CNIH1_HUMAN	YMSRPVM[+16]SGPGLYDPTTIMNADILAYCQK	Protein cornichon homolog 1 OS=Homo sapiens OX=9606 GN=CNIH1 PE=1 SV=1	O95406	88	0.0673238	0.109059	0.103874	0.0867151	0.0919035	0.100303	0.114615	0.120488	0.106895	CNIH1	CNIH1_M[+16]95	95	CNIH1	T3	OUT
sp|O95406|CNIH1_HUMAN	YMSR[+16]PVMSGPGLYDPTTIMNADILAYCQK	Protein cornichon homolog 1 OS=Homo sapiens OX=9606 GN=CNIH1 PE=1 SV=1	O95406	88	0.106871	0.0832897	0.0962252	0.108842	0.146224	0.121237	0.151127	0.118274	0.170076	CNIH1	CNIH1_R[+16]92	92	CNIH1	T3	OUT
sp|O95406|CNIH1_HUMAN	Y[+16]MSRPVMSGPGLYDPTTIMNADILAYCQK	Protein cornichon homolog 1 OS=Homo sapiens OX=9606 GN=CNIH1 PE=1 SV=1	O95406	88	0.108291	0.095629	0.097843	0.109006	0.145947	0.127352	0.150875	0.122253	0.160166	CNIH1	CNIH1_Y[+16]89	89	CNIH1	T3	OUT
sp|O95406|CNIH1_HUMAN	YM[+16]SRPVMSGPGLYDPTTIMNADILAYCQK	Protein cornichon homolog 1 OS=Homo sapiens OX=9606 GN=CNIH1 PE=1 SV=1	O95406	88	0.106871	0.163342	0.0980418	0.10872	0.145839	0.129093	0.151286	0.11734	0.160394	CNIH1	CNIH1_M[+16]90	90	CNIH1	T3	OUT
sp|O95573|ACSL3_HUMAN	GVM[+16]ISHSNIIAGITGMAER	Long-chain-fatty-acid--CoA ligase 3 OS=Homo sapiens OX=9606 GN=ACSL3 PE=1 SV=3	O95573	295	0.148619	0.116002	0.185177	0.136694	0.208782	0.167814	0.258641	0.105874	0.141955	ACSL3	ACSL3_M[+16]298	298	ACSL3	T3	OUT
sp|O95573|ACSL3_HUMAN	GVMISHSNIIAGITGM[+16]AER	Long-chain-fatty-acid--CoA ligase 3 OS=Homo sapiens OX=9606 GN=ACSL3 PE=1 SV=3	O95573	295	0.0359081	0.0341874	0.0608052	0.0484894	0.0895445	0.0525702	0.0029501	0.100748	0.0924591	ACSL3	ACSL3_M[+16]311	311	ACSL3	T3	OUT
sp|O95573|ACSL3_HUMAN	GVMISH[+16]SNIIAGITGMAER	Long-chain-fatty-acid--CoA ligase 3 OS=Homo sapiens OX=9606 GN=ACSL3 PE=1 SV=3	O95573	295	0.154193	0.115238	0.185093	0.137872	0.208782	0.106246	0.0454243	0.105874	0.149634	ACSL3	ACSL3_H[+16]301	301	ACSL3	T3	OUT
sp|O95573|ACSL3_HUMAN	NWEEGGY[+32]FNTDKPHPR	Long-chain-fatty-acid--CoA ligase 3 OS=Homo sapiens OX=9606 GN=ACSL3 PE=1 SV=3	O95573	509	0.0118093	0.151926	0.14326	0.14398	0.166703	0.0442977	0.0715089	0.130759	0.172233	ACSL3	ACSL3_Y[+32]516	516	ACSL3	T3	OUT
sp|O95573|ACSL3_HUMAN	GDTSMLKPTLM[+16]AAVPEIMDR	Long-chain-fatty-acid--CoA ligase 3 OS=Homo sapiens OX=9606 GN=ACSL3 PE=1 SV=3	O95573	369	0.169729	0.0600023	0.15083	0.118534	0.158836	0.232359	0.134532	0.168862	0.100955	ACSL3	ACSL3_M[+16]380	380	ACSL3	T3	OUT
sp|O95573|ACSL3_HUMAN	GDTSM[+16]LKPTLMAAVPEIMDR	Long-chain-fatty-acid--CoA ligase 3 OS=Homo sapiens OX=9606 GN=ACSL3 PE=1 SV=3	O95573	369	0.184937	0.111716	0.084034	0.108881	0.118735	0.134448	0.153932	0.096309	0.119877	ACSL3	ACSL3_M[+16]374	374	ACSL3	T3	OUT
sp|O96008|TOM40_HUMAN	QLSPTEAF[+16]PVLVGDMDNSGSLNAQVIHQLGPGLR	Mitochondrial import receptor subunit TOM40 homolog OS=Homo sapiens OX=9606 GN=TOMM40 PE=1 SV=1	O96008	139	0.0175555	0.000161408	0.0230201	0.0183707	0.0345136	0.0191342	0.0197293	0.0270777	0.0247146	TOM40	TOM40_F[+16]147	147	TOMM40	T3	L2
sp|O96008|TOM40_HUMAN	QLSPTEAFPVLVGDM[+16]DNSGSLNAQVIHQLGPGLR	Mitochondrial import receptor subunit TOM40 homolog OS=Homo sapiens OX=9606 GN=TOMM40 PE=1 SV=1	O96008	139	0.037373	0.0155697	0.0307104	0.0330714	0.0660832	0.0344551	0.0330823	0.044377	0.0351255	TOM40	TOM40_M[+16]154	154	TOMM40	T3	L2
sp|O96008|TOM40_HUMAN	QLSPTEAFPVLVGDM[+32]DNSGSLNAQVIHQLGPGLR	Mitochondrial import receptor subunit TOM40 homolog OS=Homo sapiens OX=9606 GN=TOMM40 PE=1 SV=1	O96008	139	0.0213514	0.00899598	0.0168886	0.0192269	0.039883	0.0206728	0.0181224	0.0259639	0.0216785	TOM40	TOM40_M[+32]154	154	TOMM40	T3	L2
sp|O96008|TOM40_HUMAN	ELFPIQM[+16]EGVK	Mitochondrial import receptor subunit TOM40 homolog OS=Homo sapiens OX=9606 GN=TOMM40 PE=1 SV=1	O96008	91	0.140255	0.0907198	0.0753219	0.152459	0.38328	0.252524	0.12643	0.184647	0.0860842	TOM40	TOM40_M[+16]98	98	TOMM40	T3	L2
sp|P00338|LDHA_HUMAN	LLIVSNPVDILTYVAW[+32]K	L-lactate dehydrogenase A chain OS=Homo sapiens OX=9606 GN=LDHA PE=1 SV=2	P00338	132	0.0741565	0.0845791	0.227811	0.0871297	0.0585607	0.0624236	0.0520059	0.0682493	0.0991119	LDHA	LDHA_W[+32]148	148	LDHA	T3	OUT
sp|P00338|LDHA_HUMAN	TLHPDLGTDKDKEQW[+32]K	L-lactate dehydrogenase A chain OS=Homo sapiens OX=9606 GN=LDHA PE=1 SV=2	P00338	212	0.0532572	0.0495249	0.0264359	0.0377759	0.0462839	0.0516208	0.0286336	0.0280877	0.0436113	LDHA	LDHA_W[+32]227	227	LDHA	T3	OUT
sp|P00338|LDHA_HUMAN	LLIVSNPVDILTY[+32]VAWK	L-lactate dehydrogenase A chain OS=Homo sapiens OX=9606 GN=LDHA PE=1 SV=2	P00338	132	0.0189491	0.0265749	0.0320806	0.0224542	0.0167422	0.01861	0.0142885	0.0210906	0.0278264	LDHA	LDHA_Y[+32]145	145	LDHA	T3	OUT
sp|P00387|NB5R3_HUMAN	DHLPPPEEEPLVLM[+16]CGPPPMIQYACLPNLDHVGHPTER	NADH-cytochrome b5 reductase 3 OS=Homo sapiens OX=9606 GN=CYB5R3 PE=1 SV=3	P00387	259	0.0307969	0.0249003	0.0133013	0.0279498	0.0208024	0.0362629	0.0116655	0.0242041	0.0478465	NB5R3	NB5R3_M[+16]273	273	CYB5R3	T3	OUT
sp|P00387|NB5R3_HUMAN	DHLPPPEEEPLVLMCGPPPMIQY[+16]ACLPNLDHVGHPTER	NADH-cytochrome b5 reductase 3 OS=Homo sapiens OX=9606 GN=CYB5R3 PE=1 SV=3	P00387	259	0.026431	0.00602514	0.00510671	0.0180393	0.0504301	0.0280758	0.019384	0.0145378	0.0176624	NB5R3	NB5R3_Y[+16]282	282	CYB5R3	T3	OUT
sp|P00395|COX1_HUMAN	VLM[+16]VEEPSMNLEWLYGCPPPYHTFEEPVYMK	Cytochrome c oxidase subunit 1 OS=Homo sapiens OX=9606 GN=MT-CO1 PE=1 SV=1	P00395	481	0.0834641	0.106902	0.0977649	0.0661554	0.075256	0.0872237	0.064821	0.0787714	0.09561	COX1	COX1_M[+16]484	484	MT-CO1	T3	OUT
sp|P00395|COX1_HUMAN	VLMVEEPSMNLEWLYGCPPPYHTFEEPVY[+16]MK	Cytochrome c oxidase subunit 1 OS=Homo sapiens OX=9606 GN=MT-CO1 PE=1 SV=1	P00395	481	0.0844284	0.0881672	0.00140975	0.0664689	0.0844644	0.0843614	0.0655379	0.0781708	0.0956658	COX1	COX1_Y[+16]510	510	MT-CO1	T3	OUT
sp|P00395|COX1_HUMAN	VLMVEEP[+16]SMNLEWLYGCPPPYHTFEEPVYMK	Cytochrome c oxidase subunit 1 OS=Homo sapiens OX=9606 GN=MT-CO1 PE=1 SV=1	P00395	481	0.0414929	0.0553314	0.0504828	0.0472209	0.0503266	0.0545587	0.03554	0.0502606	0.0173055	COX1	COX1_P[+16]488	488	MT-CO1	T3	OUT
sp|P00395|COX1_HUMAN	VLMVEEPSMNLEWLYGCP[+16]PPYHTFEEPVYMK	Cytochrome c oxidase subunit 1 OS=Homo sapiens OX=9606 GN=MT-CO1 PE=1 SV=1	P00395	481	0.0844129	0.0882233	0.00134599	0.0669638	0.0742157	0.0843596	0.064821	0.0773227	0.0947819	COX1	COX1_P[+16]499	499	MT-CO1	T3	OUT
sp|P00395|COX1_HUMAN	VLMVEEPSMNLEWLYGCPP[+16]PYHTFEEPVYMK	Cytochrome c oxidase subunit 1 OS=Homo sapiens OX=9606 GN=MT-CO1 PE=1 SV=1	P00395	481	0.083473	0.106902	0.0966477	0.0669471	0.0817437	0.0810772	0.0657489	0.0783275	0.09561	COX1	COX1_P[+16]500	500	MT-CO1	T3	OUT
sp|P00395|COX1_HUMAN	VLMVEEPSM[+32]NLEWLYGCPPPYHTFEEPVYMK	Cytochrome c oxidase subunit 1 OS=Homo sapiens OX=9606 GN=MT-CO1 PE=1 SV=1	P00395	481	0.0126537	0.0379974	0.0135758	0.0104535	0.0213135	0.0167268	0.0153071	0.0152818	0.0245282	COX1	COX1_M[+32]490	490	MT-CO1	T3	OUT
sp|P00395|COX1_HUMAN	VLMVEEPSMNLEWLYGCPPPYHTFEEPVYM[+16]K	Cytochrome c oxidase subunit 1 OS=Homo sapiens OX=9606 GN=MT-CO1 PE=1 SV=1	P00395	481	0.084384	0.0888349	0.000296345	0.0655816	0.0834203	0.0848135	0.0658055	0.0791721	0.0947792	COX1	COX1_M[+16]511	511	MT-CO1	T3	OUT
sp|P02545|LMNA_HUMAN	AQNTW[+16]GCGNSLR	Prelamin-A/C OS=Homo sapiens OX=9606 GN=LMNA PE=1 SV=1	P02545	515	0.00279357	0.0492085	0.0601643	0.052442	0.0573781	0.741302	0.0344267	0.0973121	0.024508	LMNA	LMNA_W[+16]520	520	LMNA	T3	OUT
sp|P02786|TFR1_HUMAN	HVFWGSGSH[+16]TLPALLENLK	Transferrin receptor protein 1 OS=Homo sapiens OX=9606 GN=TFRC PE=1 SV=2	P02786	698	0.00745929	0.0202023	0.00297903	0.00139589	0.0032417	0.00376405	0.00170697	0.00275037	0.0052545	TFR1	TFR1_H[+16]707	707	TFRC	T3	OUT
sp|P02786|TFR1_HUMAN	RLYW[+32]DDLK	Transferrin receptor protein 1 OS=Homo sapiens OX=9606 GN=TFRC PE=1 SV=2	P02786	120	0.185081	0.156076	0.140692	0.162389	0.143586	0.192693	0.0775856	0.203828	0.211017	TFR1	TFR1_W[+32]124	124	TFRC	T3	OUT
sp|P02786|TFR1_HUMAN	HVFW[+16]GSGSHTLPALLENLK	Transferrin receptor protein 1 OS=Homo sapiens OX=9606 GN=TFRC PE=1 SV=2	P02786	698	0.0235042	0.0312139	0.0124066	0.0198108	0.0311222	0.0248022	0.0159885	0.0159712	0.0221987	TFR1	TFR1_W[+16]702	702	TFRC	T3	OUT
sp|P02786|TFR1_HUMAN	HPVTGQFLYQDSNW[+32]ASK	Transferrin receptor protein 1 OS=Homo sapiens OX=9606 GN=TFRC PE=1 SV=2	P02786	514	0.0695557	0.0154528	0.0459491	0.0403042	0.0160822	0.0710965	0.027333	0.0531787	0.0555991	TFR1	TFR1_W[+32]528	528	TFRC	T3	OUT
sp|P02786|TFR1_HUMAN	HVFW[+32]GSGSHTLPALLENLK	Transferrin receptor protein 1 OS=Homo sapiens OX=9606 GN=TFRC PE=1 SV=2	P02786	698	0.0040299	0.109049	0.0465527	0.00264284	0.00307056	0.00432464	0.0410118	0.00254591	0.00552373	TFR1	TFR1_W[+32]702	702	TFRC	T3	OUT
sp|P03891|NU2M_HUMAN	LTW[+16]LTPLIPSTLLSLGGLPPLTGFLPK	NADH-ubiquinone oxidoreductase chain 2 OS=Homo sapiens OX=9606 GN=MT-ND2 PE=1 SV=2	P03891	236	0.00682185	0.0270051	0.00588337	0.0369715	0.0104977	0.0130573	0.022161	0.0133444	0.0175377	NU2M	NU2M_W[+16]239	239	MT-ND2	T3	OUT
sp|P04406|G3P_HUMAN	LISWY[+32]DNEFGYSNR	Glyceraldehyde-3-phosphate dehydrogenase OS=Homo sapiens OX=9606 GN=GAPDH PE=1 SV=3	P04406	309	0.0503189	0.0577588	0.0572002	0.0538934	0.0477181	0.0498759	0.0520872	0.051702	0.0657179	G3P	G3P_Y[+32]314	314	GAPDH	T3	OUT
sp|P04406|G3P_HUMAN	LISW[+32]YDNEFGYSNR	Glyceraldehyde-3-phosphate dehydrogenase OS=Homo sapiens OX=9606 GN=GAPDH PE=1 SV=3	P04406	309	0.0503179	0.0569669	0.0577653	0.0538951	0.0486928	0.0498732	0.0520854	0.0510275	0.0674007	G3P	G3P_W[+32]313	313	GAPDH	T3	OUT
sp|P05141|ADT2_HUMAN	GMLPDPKNTHIVISW[+16]MIAQTVTAVAGLTSYPFDTVR	ADP/ATP translocase 2 OS=Homo sapiens OX=9606 GN=SLC25A5 PE=1 SV=7	P05141	199	0.0164534	0.104748	0.0316178	0.00582987	0.0167175	0.00698558	0.0183829	0.0229254	0.0129019	ADT2	ADT2_W[+16]214	214	SLC25A5	T3	OUT
sp|P05141|ADT2_HUMAN	KGTDIMY[+32]TGTLDCWR	ADP/ATP translocase 2 OS=Homo sapiens OX=9606 GN=SLC25A5 PE=1 SV=7	P05141	244	0.0781392	0.260702	0.0830898	0.0727872	0.0695659	0.117171	0.0707863	0.0924539	0.124424	ADT2	ADT2_Y[+32]251	251	SLC25A5	T3	OUT
sp|P05141|ADT2_HUMAN	GMLPDPKNTHIVISWM[+32]IAQTVTAVAGLTSYPFDTVR	ADP/ATP translocase 2 OS=Homo sapiens OX=9606 GN=SLC25A5 PE=1 SV=7	P05141	199	0.0119827	0.00154363	0.0108475	0.000545935	0.00546508	0.00309043	0.0146365	0.00252734	0.00754668	ADT2	ADT2_M[+32]215	215	SLC25A5	T3	OUT
sp|P05141|ADT2_HUMAN	GMLPDPKNTHIVISWMIAQTVTAVAGLTSY[+32]PFDTVR	ADP/ATP translocase 2 OS=Homo sapiens OX=9606 GN=SLC25A5 PE=1 SV=7	P05141	199	0.0126435	0.00458454	0.0108434	0.0005553	0.0054726	0.00309231	0.0124667	0.00202288	0.00754379	ADT2	ADT2_Y[+32]229	229	SLC25A5	T3	OUT
sp|P05141|ADT2_HUMAN	KGTDIM[+16]YTGTLDCWR	ADP/ATP translocase 2 OS=Homo sapiens OX=9606 GN=SLC25A5 PE=1 SV=7	P05141	244	0.0928017	0.258517	0.0643293	0.108225	0.21174	0.102081	0.107423	0.0871911	0.100078	ADT2	ADT2_M[+16]250	250	SLC25A5	T3	OUT
sp|P05141|ADT2_HUMAN	GM[+16]LPDPKNTHIVISWMIAQTVTAVAGLTSYPFDTVR	ADP/ATP translocase 2 OS=Homo sapiens OX=9606 GN=SLC25A5 PE=1 SV=7	P05141	199	0.348918	0.580899	0.38872	0.217667	0.254282	0.164479	0.477505	0.408837	0.413474	ADT2	ADT2_M[+16]201	201	SLC25A5	T3	OUT
sp|P05141|ADT2_HUMAN	AAY[+32]FGIYDTAK	ADP/ATP translocase 2 OS=Homo sapiens OX=9606 GN=SLC25A5 PE=1 SV=7	P05141	188	0.0188433	0.0191282	0.581174	0.0219497	0.0262339	0.0205821	0.0320453	0.0151144	0.0188553	ADT2	ADT2_Y[+32]191	191	SLC25A5	T3	OUT
sp|P06748|NPM_HUMAN	MTDQEAIQDLW[+32]QWR	Nucleophosmin OS=Homo sapiens OX=9606 GN=NPM1 PE=1 SV=2	P06748	277	0.0170139	0.000747938	0.013085	0.0112191	0.0126026	0.0184344	0.00115515	0.0178062	0.00045605	NPM	NPM_W[+32]288	288	NPM1	T3	L1
sp|P06748|NPM_HUMAN	MTDQEAIQDLW[+16]QWR	Nucleophosmin OS=Homo sapiens OX=9606 GN=NPM1 PE=1 SV=2	P06748	277	0.0215771	0.401102	0.0387592	0.0298257	0.0164383	0.014801	0.00365913	0.0155729	0.00663825	NPM	NPM_W[+16]288	288	NPM1	T3	L1
sp|P07437|TBB5_HUMAN	SGPFGQIFRPDNFVFGQSGAGNNW[+32]AK	Tubulin beta chain OS=Homo sapiens OX=9606 GN=TUBB PE=1 SV=2	P07437	77	0.0179472	0.0115834	0.187567	0.0192225	0.0148368	0.0142196	0.0110823	0.0118655	0.00434886	TBB5	TBB5_W[+32]101	101	TUBB	T3	OUT
sp|P07437|TBB5_HUMAN	EAESCDCLQGFQLTHSLGGGTGSGM[+16]GTLLISK	Tubulin beta chain OS=Homo sapiens OX=9606 GN=TUBB PE=1 SV=2	P07437	122	0.174143	0.115494	0.0417956	0.0535905	0.233917	0.0865702	0.158682	0.0933813	0.171934	TBB5	TBB5_M[+16]147	147	TUBB	T3	OUT
sp|P07437|TBB5_HUMAN	SGPFGQIFRPDNFVFGQSGAGNNW[+16]AK	Tubulin beta chain OS=Homo sapiens OX=9606 GN=TUBB PE=1 SV=2	P07437	77	0.0209861	0.0172819	0.0137449	0.0264989	0.058964	0.0268234	0.0556593	0.0139738	0.0785981	TBB5	TBB5_W[+16]101	101	TUBB	T3	OUT
sp|P07437|TBB5_HUMAN	LTTPTYGDLNHLVSATM[+16]SGVTTCLR	Tubulin beta chain OS=Homo sapiens OX=9606 GN=TUBB PE=1 SV=2	P07437	216	0.163141	0.0681458	0.0782473	0.0816381	0.335504	0.0879426	0.0682917	0.0439789	0.0629282	TBB5	TBB5_M[+16]233	233	TUBB	T3	OUT
sp|P08195|4F2_HUMAN	W[+32]WHTGALYR	4F2 cell-surface antigen heavy chain OS=Homo sapiens OX=9606 GN=SLC3A2 PE=1 SV=3	P08195	217	0.395922	0.358092	0.223225	0.271237	0.281668	0.299552	0.200518	0.329875	0.276418	4F2	4F2_W[+32]218	218	SLC3A2	T3	OUT
sp|P08195|4F2_HUMAN	EVELNELEPEKQPMNAASGAAM[+16]SLAGAEK	4F2 cell-surface antigen heavy chain OS=Homo sapiens OX=9606 GN=SLC3A2 PE=1 SV=3	P08195	111	0.0506854	0.0174788	0.0351065	0.0481376	0.12524	0.0839506	0.115345	0.0394655	0.132014	4F2	4F2_M[+16]133	133	SLC3A2	T3	OUT
sp|P08195|4F2_HUMAN	EVELNELEPEKQP[+16]MNAASGAAMSLAGAEK	4F2 cell-surface antigen heavy chain OS=Homo sapiens OX=9606 GN=SLC3A2 PE=1 SV=3	P08195	111	0.0184021	0.00468463	0.0122954	0.0140755	0.107129	0.0520695	0.0178399	0.0167265	0.0249009	4F2	4F2_P[+16]124	124	SLC3A2	T3	OUT
sp|P08195|4F2_HUMAN	HW[+32]DQNER	4F2 cell-surface antigen heavy chain OS=Homo sapiens OX=9606 GN=SLC3A2 PE=1 SV=3	P08195	555	0.174448	0.15753	0.190614	0.130312	0.175415	0.202643	0.079156	0.145952	0.166527	4F2	4F2_W[+32]557	557	SLC3A2	T3	OUT
sp|P08195|4F2_HUMAN	GENSWF[+32]STQVDTVATK	4F2 cell-surface antigen heavy chain OS=Homo sapiens OX=9606 GN=SLC3A2 PE=1 SV=3	P08195	313	0.432864	0.0221725	0.0189327	0.0180398	0.0333325	0.295062	0.0228402	0.0144076	0.0219323	4F2	4F2_F[+32]319	319	SLC3A2	T3	OUT
sp|P08574|CY1_HUMAN	EGLYFNPYFP[+16]GQAIAMAPPIYTDVLEFDDGTPATMSQIAK	Cytochrome c1, heme protein, mitochondrial OS=Homo sapiens OX=9606 GN=CYC1 PE=1 SV=3	P08574	228	0.116027	0.145542	0.00789846	0.100434	0.151051	0.128813	0.101525	0.132129	0.142048	CY1	CY1_P[+16]238	238	CYC1	T3	OUT
sp|P08574|CY1_HUMAN	EGLYFNPYFPGQAIAMAPPIYTDVLEFDDGTPATM[+16]SQIAK	Cytochrome c1, heme protein, mitochondrial OS=Homo sapiens OX=9606 GN=CYC1 PE=1 SV=3	P08574	228	0.0931034	0.0574252	0.150743	0.0847153	0.13047	0.115793	0.0778004	0.11253	0.0219015	CY1	CY1_M[+16]263	263	CYC1	T3	OUT
sp|P08574|CY1_HUMAN	EGLYFNP[+16]YFPGQAIAMAPPIYTDVLEFDDGTPATMSQIAK	Cytochrome c1, heme protein, mitochondrial OS=Homo sapiens OX=9606 GN=CYC1 PE=1 SV=3	P08574	228	0.0511193	0.000322844	0.0495366	0.0323536	0.0565538	0.0495688	0	0.050522	0.0505489	CY1	CY1_P[+16]235	235	CYC1	T3	OUT
sp|P10176|COX8A_HUMAN	LGIM[+16]ELAVGLTSCFVTFLLPAGWILSHLETYR	Cytochrome c oxidase subunit 8A, mitochondrial OS=Homo sapiens OX=9606 GN=COX8A PE=1 SV=2	P10176	34	0.0666517	0.0291822	0.217363	0.140484	0.133812	0.108657	0.095497	0.116328	0.148398	COX8A	COX8A_M[+16]38	38	COX8A	T3	OUT
sp|P10809|CH60_HUMAN	ALMLQGVDLLADAVAVTM[+16]GPK	60 kDa heat shock protein, mitochondrial OS=Homo sapiens OX=9606 GN=HSPD1 PE=1 SV=2	P10809	37	0.230097	0.149238	0.137249	0.208895	0.282877	0.165622	0.217069	0.153294	0.198928	CH60	CH60_M[+16]55	55	HSPD1	T3	OUT
sp|P11021|BIP_HUMAN	TW[+32]NDPSVQQDIK	Endoplasmic reticulum chaperone BiP OS=Homo sapiens OX=9606 GN=HSPA5 PE=1 SV=2	P11021	101	0.0668166	0.0210729	0.0355249	0.0386511	0.0447458	0.0531134	0.0319682	0.0382445	0.051182	BIP	BIP_W[+32]103	103	HSPA5	T3	OUT
sp|P11021|BIP_HUMAN	TW[+16]NDPSVQQDIK	Endoplasmic reticulum chaperone BiP OS=Homo sapiens OX=9606 GN=HSPA5 PE=1 SV=2	P11021	101	0.0252761	0.452221	0.0200026	0.0127616	0.0288759	0.0171149	0.000766382	0.0184654	0.00593742	BIP	BIP_W[+16]103	103	HSPA5	T3	OUT
sp|P12236|ADT3_HUMAN	EQGVLSFW[+16]R	ADP/ATP translocase 3 OS=Homo sapiens OX=9606 GN=SLC25A6 PE=1 SV=4	P12236	63	0.0220704	0.0178289	0.0167714	0.0187544	0.0196201	0.0198169	0.0173429	0.0122305	0.0215424	ADT3	ADT3_W[+16]71	71	SLC25A6	T3	OUT
sp|P12236|ADT3_HUMAN	HTQFW[+32]R	ADP/ATP translocase 3 OS=Homo sapiens OX=9606 GN=SLC25A6 PE=1 SV=4	P12236	105	0.181935	0.152947	0.466771	0.212944	0.30006	0.30772	0.112031	0.206537	0.111532	ADT3	ADT3_W[+32]110	110	SLC25A6	T3	OUT
sp|P12236|ADT3_HUMAN	KGADIM[+16]YTGTVDCWR	ADP/ATP translocase 3 OS=Homo sapiens OX=9606 GN=SLC25A6 PE=1 SV=4	P12236	244	0.0433107	0.0181046	0.0365754	0.05804	0.138606	0.0558655	0.0599001	0.0516709	0.0719002	ADT3	ADT3_M[+16]250	250	SLC25A6	T3	OUT
sp|P12236|ADT3_HUMAN	HTQFW[+16]R	ADP/ATP translocase 3 OS=Homo sapiens OX=9606 GN=SLC25A6 PE=1 SV=4	P12236	105	0.167913	0.208441	0.249847	0.144358	0.113033	0.131491	0.101231	0.107822	0.160692	ADT3	ADT3_W[+16]110	110	SLC25A6	T3	OUT
sp|P12236|ADT3_HUMAN	EQGVLSFW[+32]R	ADP/ATP translocase 3 OS=Homo sapiens OX=9606 GN=SLC25A6 PE=1 SV=4	P12236	63	0.0280576	0.0257536	0.0209512	0.0218454	0.021923	0.0239656	0.0214319	0.0153692	0.0259528	ADT3	ADT3_W[+32]71	71	SLC25A6	T3	OUT
sp|P12236|ADT3_HUMAN	GM[+16]GGAFVLVLYDELKK	ADP/ATP translocase 3 OS=Homo sapiens OX=9606 GN=SLC25A6 PE=1 SV=4	P12236	280	0.324206	0.112317	0.257288	0.229484	0.310473	0.899286	0.277843	0.209267	0.336282	ADT3	ADT3_M[+16]282	282	SLC25A6	T3	OUT
sp|P12236|ADT3_HUMAN	GAW[+32]SNVLR	ADP/ATP translocase 3 OS=Homo sapiens OX=9606 GN=SLC25A6 PE=1 SV=4	P12236	272	0.0501449	0.39413	0.0488279	0.0526376	0.0478525	0.0530157	0.0423144	0.0500668	0.0571537	ADT3	ADT3_W[+32]275	275	SLC25A6	T3	OUT
sp|P12236|ADT3_HUMAN	KGADIMY[+32]TGTVDCWR	ADP/ATP translocase 3 OS=Homo sapiens OX=9606 GN=SLC25A6 PE=1 SV=4	P12236	244	0.0512438	0.0498811	0.0581409	0.0507972	0.136974	0.0585706	0.039584	0.0463855	0.0616673	ADT3	ADT3_Y[+32]251	251	SLC25A6	T3	OUT
sp|P12236|ADT3_HUMAN	GAW[+16]SNVLR	ADP/ATP translocase 3 OS=Homo sapiens OX=9606 GN=SLC25A6 PE=1 SV=4	P12236	272	0.0423421	0.385491	0.0670933	0.0184244	0.0473271	0.0455347	0.00817001	0.0342526	0.024934	ADT3	ADT3_W[+16]275	275	SLC25A6	T3	OUT
sp|P13667|PDIA4_HUMAN	ENFDEVVNDADIILVEFYAP[+16]WCGHCK	Protein disulfide-isomerase A4 OS=Homo sapiens OX=9606 GN=PDIA4 PE=1 SV=2	P13667	184	0.328299	0.00280463	0.217923	0.31599	0.342604	0.198833	0.284996	0.211308	0.269274	PDIA4	PDIA4_P[+16]204	204	PDIA4	T3	OUT
sp|P14625|ENPL_HUMAN	TVWDWELM[+16]NDIKPIWQRPSK	Endoplasmin OS=Homo sapiens OX=9606 GN=HSP90B1 PE=1 SV=1	P14625	328	0.129088	0.0710563	0.0667842	0.102853	0.172834	0.107874	0.0534944	0.0954022	0.133209	ENPL	ENPL_M[+16]336	336	HSP90B1	T3	OUT
sp|P14625|ENPL_HUMAN	TVW[+32]DWELMNDIKPIWQRPSK	Endoplasmin OS=Homo sapiens OX=9606 GN=HSP90B1 PE=1 SV=1	P14625	328	0.200406	0.228705	0.189319	0.166312	0.114228	0.219724	0.121791	0.128449	0.0145492	ENPL	ENPL_W[+32]331	331	HSP90B1	T3	OUT
sp|P14854|CX6B1_HUMAN	NCW[+32]QNYLDFHR	Cytochrome c oxidase subunit 6B1 OS=Homo sapiens OX=9606 GN=COX6B1 PE=1 SV=2	P14854	28	0.0924667	0.0952143	0.0781016	0.0631096	0.0893993	0.0754366	0	0.0135473	0.0727544	CX6B1	CX6B1_W[+32]31	31	COX6B1	T3	L2
sp|P14927|QCR7_HUMAN	W[+32]YYNAAGFNK	Cytochrome b-c1 complex subunit 7 OS=Homo sapiens OX=9606 GN=UQCRB PE=1 SV=2	P14927	19	0.166968	0.127808	0.0165256	0.0358422	0.47743	0.14354	0.0315466	0.0732821	0.055947	QCR7	QCR7_W[+32]20	20	UQCRB	T3	OUT
sp|P18754|RCC1_HUMAN	SM[+16]VPVQVQLDVPVVK	Regulator of chromosome condensation OS=Homo sapiens OX=9606 GN=RCC1 PE=1 SV=1	P18754	161	0.160812	0.121688	0.107947	0.471913	0.435776	0.146932	0.590077	0.14696	0.227177	RCC1	RCC1_M[+16]163	163	RCC1	T3	OUT
sp|P20340|RAB6A_HUMAN	GSDVIIM[+16]LVGNK	Ras-related protein Rab-6A OS=Homo sapiens OX=9606 GN=RAB6A PE=1 SV=3	P20340	115	0.0956116	0.0561389	0.522957	0.0730123	0.12868	0.196277	0.120359	0.107405	0.133991	RAB6A	RAB6A_M[+16]122	122	RAB6A	T3	OUT
sp|P20340|RAB6A_HUMAN	LQLW[+32]DTAGQER	Ras-related protein Rab-6A OS=Homo sapiens OX=9606 GN=RAB6A PE=1 SV=3	P20340	63	0.107751	0.0479228	0.0396397	0.0331442	0.0344021	0.0323804	0.0264523	0.0356707	0.0378996	RAB6A	RAB6A_W[+32]67	67	RAB6A	T3	OUT
sp|P20674|COX5A_HUMAN	WVTY[+32]FNKPDIDAWELR	Cytochrome c oxidase subunit 5A, mitochondrial OS=Homo sapiens OX=9606 GN=COX5A PE=1 SV=2	P20674	55	0.0447837	0.045314	0.0180486	0.0197262	0.0554903	0.0335486	0.00411839	0.0499711	0.0477337	COX5A	COX5A_Y[+32]59	59	COX5A	T3	OUT
sp|P20674|COX5A_HUMAN	W[+32]VTYFNKPDIDAWELRK	Cytochrome c oxidase subunit 5A, mitochondrial OS=Homo sapiens OX=9606 GN=COX5A PE=1 SV=2	P20674	55	0.0636114	0.076814	0.0115114	0.0716254	0.0739081	0.0834626	0.0755795	0.0559917	0.0654607	COX5A	COX5A_W[+32]56	56	COX5A	T3	OUT
sp|P26641|EF1G_HUMAN	GQELAFPLSPDW[+32]QVDYESYTWR	Elongation factor 1-gamma OS=Homo sapiens OX=9606 GN=EEF1G PE=1 SV=3	P26641	378	0.0805806	0.171634	0.0119488	0.0533543	0.0631041	0.0564727	0.0572508	0.10554	0.164451	EF1G	EF1G_W[+32]390	390	EEF1G	T3	OUT
sp|P27797|CALR_HUMAN	LFP[+16]NSLDQTDMHGDSEYNIMFGPDICGPGTK	Calreticulin OS=Homo sapiens OX=9606 GN=CALR PE=1 SV=1	P27797	111	0.0330889	0.0131833	0.0237759	0.0587621	0.0342641	0.0279495	0.12775	0.0559753	0.0337153	CALR	CALR_P[+16]114	114	CALR	T3	OUT
sp|P27797|CALR_HUMAN	LFPNSLDQTDM[+32]HGDSEYNIMFGPDICGPGTK	Calreticulin OS=Homo sapiens OX=9606 GN=CALR PE=1 SV=1	P27797	111	0.0965631	0	0	0.0126437	0.0107177	0.00909405	0.000629907	0	0.010234	CALR	CALR_M[+32]122	122	CALR	T3	OUT
sp|P27797|CALR_HUMAN	HEQNIDCGGGY[+32]VK	Calreticulin OS=Homo sapiens OX=9606 GN=CALR PE=1 SV=1	P27797	98	0.00285442	0.00366075	0.0599851	0.0175527	0.00540227	0.00832377	0.00311571	0.0137448	0.0191582	CALR	CALR_Y[+32]109	109	CALR	T3	OUT
sp|P27797|CALR_HUMAN	IKDPDASKPEDW[+32]DER	Calreticulin OS=Homo sapiens OX=9606 GN=CALR PE=1 SV=1	P27797	207	0.227949	0.193873	0.00120409	0.00729694	0.0101782	0	0	0.00546333	0.00907906	CALR	CALR_W[+32]219	219	CALR	T3	OUT
sp|P27797|CALR_HUMAN	KPEDWDEEMDGEW[+16]EPPVIQNPEYK	Calreticulin OS=Homo sapiens OX=9606 GN=CALR PE=1 SV=1	P27797	248	0.50638	0.178809	0.0310679	0.0851304	0.246217	0.125763	0.188787	0.125888	0.154907	CALR	CALR_W[+16]261	261	CALR	T3	OUT
sp|P27797|CALR_HUMAN	LFPNSLDQTDMHGDSEY[+16]NIMFGPDICGPGTK	Calreticulin OS=Homo sapiens OX=9606 GN=CALR PE=1 SV=1	P27797	111	0.0791786	1.21365e-05	0.0263108	0.058747	0.0772367	0.0703577	0.0964548	0.0656373	0.0363189	CALR	CALR_Y[+16]128	128	CALR	T3	OUT
sp|P27797|CALR_HUMAN	LFPNSLDQTDMHGDSEYNIM[+16]FGPDICGPGTK	Calreticulin OS=Homo sapiens OX=9606 GN=CALR PE=1 SV=1	P27797	111	0.234861	0.0312236	0.0156497	0.0138606	0.0388353	0.0195661	0.0470101	0.0701407	0.0201057	CALR	CALR_M[+16]131	131	CALR	T3	OUT
sp|P27797|CALR_HUMAN	SGTIFDNFLITNDEAY[+32]AEEFGNETWGVTK	Calreticulin OS=Homo sapiens OX=9606 GN=CALR PE=1 SV=1	P27797	322	0.0388909	0.0348618	0.0235696	0.029393	0.0466587	0.047658	0.0230546	0.0598865	0.080172	CALR	CALR_Y[+32]338	338	CALR	T3	OUT
sp|P27797|CALR_HUMAN	KPEDWDEEM[+16]DGEWEPPVIQNPEYK	Calreticulin OS=Homo sapiens OX=9606 GN=CALR PE=1 SV=1	P27797	248	0.0416091	0.17174	0.150637	0.0784011	0.246155	0.144434	0.188575	0.127668	0.154871	CALR	CALR_M[+16]257	257	CALR	T3	OUT
sp|P27797|CALR_HUMAN	KPEDWDEEMDGEW[+32]EPPVIQNPEYK	Calreticulin OS=Homo sapiens OX=9606 GN=CALR PE=1 SV=1	P27797	248	0.0605889	0.052207	0.0304631	0.0658696	0.0435947	0.0910831	0.0484031	0.0521909	0.0712964	CALR	CALR_W[+32]261	261	CALR	T3	OUT
sp|P27797|CALR_HUMAN	EQFLDGDGW[+32]TSR	Calreticulin OS=Homo sapiens OX=9606 GN=CALR PE=1 SV=1	P27797	24	0.123214	0.0991874	0.119195	0.0853064	0.10448	0.127937	0.104088	0.0938889	0.122019	CALR	CALR_W[+32]33	33	CALR	T3	OUT
sp|P27824|CALX_HUMAN	EIEDPEDRKPEDW[+32]DERPK	Calnexin OS=Homo sapiens OX=9606 GN=CANX PE=1 SV=2	P27824	274	0.0788669	0.0727222	0.0687075	0.129399	0.0788363	0.0836128	0.0540653	0.0692277	0.0833141	CALX	CALX_W[+32]287	287	CANX	T3	OUT
sp|P27824|CALX_HUMAN	WKPP[+16]MIDNPSYQGIWKPR	Calnexin OS=Homo sapiens OX=9606 GN=CANX PE=1 SV=2	P27824	382	0.00412374	0.0131676	0.0387885	0.00713992	0.0212213	0.00648528	0.0193267	0.00701332	0.0037929	CALX	CALX_P[+16]386	386	CANX	T3	OUT
sp|P27824|CALX_HUMAN	GTLSGW[+16]ILSK	Calnexin OS=Homo sapiens OX=9606 GN=CANX PE=1 SV=2	P27824	77	0.0166725	0.0257904	0.0236524	0.021496	0.00758762	0.0124425	0.0174454	0.011079	0.00265476	CALX	CALX_W[+16]83	83	CANX	T3	OUT
sp|P27824|CALX_HUMAN	WKPPM[+16]IDNPSYQGIWKPR	Calnexin OS=Homo sapiens OX=9606 GN=CANX PE=1 SV=2	P27824	382	0.145187	0.130922	0.0856789	0.131434	0.132837	0.141777	0.308997	0.182466	0.126561	CALX	CALX_M[+16]387	387	CANX	T3	OUT
sp|P27824|CALX_HUMAN	M[+16]TPFSAIGLELWSMTSDIFFDNFIICADRR	Calnexin OS=Homo sapiens OX=9606 GN=CANX PE=1 SV=2	P27824	415	0.047299	0.0112066	0.0201421	0.00930316	0.0766369	0.0219591	0.0055311	0.00163343	0.00519834	CALX	CALX_M[+16]416	416	CANX	T3	OUT
sp|P27824|CALX_HUMAN	KPEDW[+16]DERPK	Calnexin OS=Homo sapiens OX=9606 GN=CANX PE=1 SV=2	P27824	282	0.000983923	0.00232223	0.0306254	0.0341044	0.0517777	0.00233395	0.00109473	0.00752244	0.0120878	CALX	CALX_W[+16]287	287	CANX	T3	OUT
sp|P27824|CALX_HUMAN	WKP[+16]PMIDNPSYQGIWKPR	Calnexin OS=Homo sapiens OX=9606 GN=CANX PE=1 SV=2	P27824	382	0.157027	0.00390409	0.000912772	0.147911	0.107156	0.170364	0.00223539	0.070491	0.0368327	CALX	CALX_P[+16]385	385	CANX	T3	OUT
sp|P27824|CALX_HUMAN	IVDDW[+32]ANDGWGLKK	Calnexin OS=Homo sapiens OX=9606 GN=CANX PE=1 SV=2	P27824	445	0.0591616	0.0440034	0.04543	0.0477425	0.0404704	0.0578763	0.0394113	0.0431917	0.0575873	CALX	CALX_W[+32]450	450	CANX	T3	OUT
sp|P27824|CALX_HUMAN	GTLSGW[+32]ILSK	Calnexin OS=Homo sapiens OX=9606 GN=CANX PE=1 SV=2	P27824	77	0.0260999	0.0217172	0.0464378	0.0201534	0.0221213	0.0207641	0.055813	0.018746	0.0147475	CALX	CALX_W[+32]83	83	CANX	T3	OUT
sp|P27824|CALX_HUMAN	WKPPMIDNP[+16]SYQGIWKPR	Calnexin OS=Homo sapiens OX=9606 GN=CANX PE=1 SV=2	P27824	382	0.00498685	0.0100353	0.00605791	0.00738631	0.00460596	0.00478786	0.00878999	0.0143872	0.00462512	CALX	CALX_P[+16]391	391	CANX	T3	OUT
sp|P27824|CALX_HUMAN	W[+32]KPPMIDNPSYQGIWKPR	Calnexin OS=Homo sapiens OX=9606 GN=CANX PE=1 SV=2	P27824	382	0.00929377	0.0410862	0.0421773	0.0136318	0.0245687	0.0311469	0.0137787	0.0254782	0.0204799	CALX	CALX_W[+32]383	383	CANX	T3	OUT
sp|P27824|CALX_HUMAN	THLYTLILNPDNSFEILVDQSVVNSGNLLNDM[+16]TPPVNPSR	Calnexin OS=Homo sapiens OX=9606 GN=CANX PE=1 SV=2	P27824	234	0.128911	0.182017	0.116811	0.117409	0.167849	0.196809	0.233178	0.079528	0.065921	CALX	CALX_M[+16]266	266	CANX	T3	OUT
sp|P33947|ERD22_HUMAN	LTGDLSHLAAIVILLLKIW[+32]KTR	ER lumen protein-retaining receptor 2 OS=Homo sapiens OX=9606 GN=KDELR2 PE=1 SV=1	P33947	5	0.0109031	0.00198388	0.0123475	0.0113705	0.00733951	0.0076023	0.00739136	0.0106468	0.012268	ERD22	ERD22_W[+32]24	24	KDELR2	T3	OUT
sp|P33947|ERD22_HUMAN	LTGDLSHLAAIVILLLKIW[+16]KTR	ER lumen protein-retaining receptor 2 OS=Homo sapiens OX=9606 GN=KDELR2 PE=1 SV=1	P33947	5	0.0107894	0.0159197	0.00781354	0.00887639	0.00302724	0.00648508	0.004257	0.00258358	0.000329792	ERD22	ERD22_W[+16]24	24	KDELR2	T3	OUT
sp|P48730|KC1D_HUMAN	KGNLVY[+32]IIDFGLAK	Casein kinase I isoform delta OS=Homo sapiens OX=9606 GN=CSNK1D PE=1 SV=2	P48730	140	0.922246	0.506461	0.940985	0.407556	0.612731	0.446765	0.478187	0.502528	0.430148	KC1D	KC1D_Y[+32]146	146	CSNK1D	T3	OUT
sp|P49257|LMAN1_HUMAN	GAGM[+16]PGQHGQITQQELDTVVK	Protein ERGIC-53 OS=Homo sapiens OX=9606 GN=LMAN1 PE=1 SV=2	P49257	373	0.31671	0.316928	0.239525	0.262797	0.182822	0.322365	0.0385232	0.31737	0.237966	LMAN1	LMAN1_M[+16]377	377	LMAN1	T3	OUT
sp|P49257|LMAN1_HUMAN	GAGMP[+16]GQHGQITQQELDTVVK	Protein ERGIC-53 OS=Homo sapiens OX=9606 GN=LMAN1 PE=1 SV=2	P49257	373	0.316695	0.321064	0.240515	0.283792	0.262337	0.316434	0.372054	0.317501	0.237943	LMAN1	LMAN1_P[+16]378	378	LMAN1	T3	OUT
sp|P49257|LMAN1_HUMAN	LVSGM[+16]QHPGSAGGVYETTQHFIDIK	Protein ERGIC-53 OS=Homo sapiens OX=9606 GN=LMAN1 PE=1 SV=2	P49257	415	0.0826682	0.0689029	0.0733059	0.0852958	0.116039	0.090386	0.0826173	0.0804034	0.06692	LMAN1	LMAN1_M[+16]420	420	LMAN1	T3	OUT
sp|P49257|LMAN1_HUMAN	GAGM[+32]PGQHGQITQQELDTVVK	Protein ERGIC-53 OS=Homo sapiens OX=9606 GN=LMAN1 PE=1 SV=2	P49257	373	0.0248962	0.0355647	0.0982356	0.108026	0.188705	0.0145113	0.181874	0.0495423	0.140807	LMAN1	LMAN1_M[+32]377	377	LMAN1	T3	OUT
sp|P49257|LMAN1_HUMAN	LVSGMQH[+16]PGSAGGVYETTQHFIDIK	Protein ERGIC-53 OS=Homo sapiens OX=9606 GN=LMAN1 PE=1 SV=2	P49257	415	0.0810748	0.0687951	0.0737145	0.0847274	0.116638	0.0903858	0.0826735	0.0804257	0.0680712	LMAN1	LMAN1_H[+16]422	422	LMAN1	T3	OUT
sp|P49368|TCPG_HUMAN	ILQMEEEY[+16]IQQLCEDIIQLKPDVVITEK	T-complex protein 1 subunit gamma OS=Homo sapiens OX=9606 GN=CCT3 PE=1 SV=4	P49368	266	0.0456992	0.060728	0.0429643	0.117055	0.0538142	0.123636	0.252566	0.0744863	0.0767625	TCPG	TCPG_Y[+16]274	274	CCT3	T3	OUT
sp|P49368|TCPG_HUMAN	ILQM[+16]EEEYIQQLCEDIIQLKPDVVITEK	T-complex protein 1 subunit gamma OS=Homo sapiens OX=9606 GN=CCT3 PE=1 SV=4	P49368	266	0.0446599	0	0.00337318	0.0247807	0.0537918	0.123644	0.00715216	0.0364262	0.0766536	TCPG	TCPG_M[+16]270	270	CCT3	T3	OUT
sp|P51149|RAB7A_HUMAN	TLDSW[+32]RDEFLIQASPR	Ras-related protein Rab-7a OS=Homo sapiens OX=9606 GN=RAB7A PE=1 SV=1	P51149	97	0.00763804	0.1361	0.00473359	0.0109337	0.0149248	0.00683247	0.00882548	0.0113949	0.0139082	RAB7A	RAB7A_W[+32]102	102	RAB7A	T3	OUT
sp|P51149|RAB7A_HUMAN	LVTM[+16]QIWDTAGQER	Ras-related protein Rab-7a OS=Homo sapiens OX=9606 GN=RAB7A PE=1 SV=1	P51149	55	0.111129	0.0745384	0.134474	0.0837165	0.220153	0.234074	0.235737	0.147825	0.134817	RAB7A	RAB7A_M[+16]59	59	RAB7A	T3	OUT
sp|P51149|RAB7A_HUMAN	LVTMQIW[+32]DTAGQER	Ras-related protein Rab-7a OS=Homo sapiens OX=9606 GN=RAB7A PE=1 SV=1	P51149	55	0.0572942	0.0550245	0.0524946	0.0132642	0.056721	0.0121944	0.0110465	0.0167974	0.0468984	RAB7A	RAB7A_W[+32]62	62	RAB7A	T3	OUT
sp|P60709|ACTB_HUMAN	IWHHTFY[+32]NELR	Actin, cytoplasmic 1 OS=Homo sapiens OX=9606 GN=ACTB PE=1 SV=1	P60709	84	0.0245352	0.0200131	0.0174267	0.00831607	0.0169638	0.0171014	0.0141992	0.0165522	0.0188636	ACTB	ACTB_Y[+32]91	91	ACTB	T3	L1
sp|P60709|ACTB_HUMAN	CPEALFQPSFLGMESCGIHETTFNSIM[+16]K	Actin, cytoplasmic 1 OS=Homo sapiens OX=9606 GN=ACTB PE=1 SV=1	P60709	256	0.112403	0.150577	0.100414	0.138271	0.181185	0.116546	0.109109	0.120074	0.123912	ACTB	ACTB_M[+16]283	283	ACTB	T3	L1
sp|P60709|ACTB_HUMAN	MTQIMFETFNTPAMY[+16]VAIQAVLSLYASGR	Actin, cytoplasmic 1 OS=Homo sapiens OX=9606 GN=ACTB PE=1 SV=1	P60709	118	0.0106378	0.0219649	0.0461666	0.00446623	0.0215717	0.0299748	0.0194863	0.0545222	0.0230756	ACTB	ACTB_Y[+16]133	133	ACTB	T3	L1
sp|P60709|ACTB_HUMAN	MTQIM[+32]FETFNTPAMYVAIQAVLSLYASGR	Actin, cytoplasmic 1 OS=Homo sapiens OX=9606 GN=ACTB PE=1 SV=1	P60709	118	0.0117643	0.0485361	0.0716413	0.0344219	0.0391099	0.0611216	0.0256936	0.0145586	0.016097	ACTB	ACTB_M[+32]123	123	ACTB	T3	L1
sp|P60709|ACTB_HUMAN	MTQIMF[+16]ETFNTPAMYVAIQAVLSLYASGR	Actin, cytoplasmic 1 OS=Homo sapiens OX=9606 GN=ACTB PE=1 SV=1	P60709	118	0.127101	0.102948	0.27662	0.0327289	0.0506665	0.0285611	0.0269356	0.0401725	0.052287	ACTB	ACTB_F[+16]124	124	ACTB	T3	L1
sp|P60709|ACTB_HUMAN	HQGVM[+32]VGMGQK	Actin, cytoplasmic 1 OS=Homo sapiens OX=9606 GN=ACTB PE=1 SV=1	P60709	39	0.00970015	0.00828175	0.00149955	0.00236515	0.0801163	0.025917	0.000903741	0.0102012	0.0141798	ACTB	ACTB_M[+32]44	44	ACTB	T3	L1
sp|P60709|ACTB_HUMAN	HQGVMVGM[+16]GQK	Actin, cytoplasmic 1 OS=Homo sapiens OX=9606 GN=ACTB PE=1 SV=1	P60709	39	0.0552277	0.0242682	0.0467936	0.0572767	0.114432	0.05345	0.0629637	0.0395151	0.0690337	ACTB	ACTB_M[+16]47	47	ACTB	T3	L1
sp|P60709|ACTB_HUMAN	DLTDYLM[+16]K	Actin, cytoplasmic 1 OS=Homo sapiens OX=9606 GN=ACTB PE=1 SV=1	P60709	183	0.164574	0.139365	0.11985	0.0949547	0.269415	0.205597	0.193883	0.201221	0.190701	ACTB	ACTB_M[+16]190	190	ACTB	T3	L1
sp|P60709|ACTB_HUMAN	GY[+32]SFTTTAER	Actin, cytoplasmic 1 OS=Homo sapiens OX=9606 GN=ACTB PE=1 SV=1	P60709	196	0.0447382	0.05706	0.00633832	0.0687598	0.049892	0.0550856	0.00209338	0.0364188	0.0388961	ACTB	ACTB_Y[+32]198	198	ACTB	T3	L1
sp|P60709|ACTB_HUMAN	LCYVALDF[+16]EQEMATAASSSSLEK	Actin, cytoplasmic 1 OS=Homo sapiens OX=9606 GN=ACTB PE=1 SV=1	P60709	215	0.45119	0.146554	0.0474309	0.0516638	0.381066	0.352859	0.307264	0.291613	0.0936865	ACTB	ACTB_F[+16]223	223	ACTB	T3	L1
sp|P60709|ACTB_HUMAN	LCYVALDFEQEM[+16]ATAASSSSLEK	Actin, cytoplasmic 1 OS=Homo sapiens OX=9606 GN=ACTB PE=1 SV=1	P60709	215	0.334276	0.663813	0.0957683	0.502232	0.58377	0.532927	0.505554	0.50939	0.873696	ACTB	ACTB_M[+16]227	227	ACTB	T3	L1
sp|P60709|ACTB_HUMAN	CPEALFQPSF[+32]LGMESCGIHETTFNSIMK	Actin, cytoplasmic 1 OS=Homo sapiens OX=9606 GN=ACTB PE=1 SV=1	P60709	256	0.00841536	0.0462367	0.00737369	0.0304858	0.00933995	0.0102253	0.0359026	0.0212911	0.0339291	ACTB	ACTB_F[+32]266	266	ACTB	T3	L1
sp|P60709|ACTB_HUMAN	CPEALFQPSFLGM[+16]ESCGIHETTFNSIMK	Actin, cytoplasmic 1 OS=Homo sapiens OX=9606 GN=ACTB PE=1 SV=1	P60709	256	0.105114	0.00190069	0.0296096	0.0145783	0.209679	0.123296	0.120071	0.124937	0.182045	ACTB	ACTB_M[+16]269	269	ACTB	T3	L1
sp|P60709|ACTB_HUMAN	CPEALFQPSFLGM[+32]ESCGIHETTFNSIMK	Actin, cytoplasmic 1 OS=Homo sapiens OX=9606 GN=ACTB PE=1 SV=1	P60709	256	0.0281451	0.0462481	0.00834213	0.0304783	0.00355185	0.0159845	0.0348796	0.0212423	0.033537	ACTB	ACTB_M[+32]269	269	ACTB	T3	L1
sp|P60709|ACTB_HUMAN	M[+32]TQIMFETFNTPAMYVAIQAVLSLYASGR	Actin, cytoplasmic 1 OS=Homo sapiens OX=9606 GN=ACTB PE=1 SV=1	P60709	118	0.0176243	0.0485203	0.071756	0.0344554	0.0405893	0.0696208	0.0257191	0.0165167	0.00926716	ACTB	ACTB_M[+32]119	119	ACTB	T3	L1
sp|P60709|ACTB_HUMAN	DLYANTVLSGGTTM[+16]YPGIADR	Actin, cytoplasmic 1 OS=Homo sapiens OX=9606 GN=ACTB PE=1 SV=1	P60709	291	0.35317	0.298188	0.146823	0.344971	0.40383	0.275166	0.373779	0.321068	0.229656	ACTB	ACTB_M[+16]305	305	ACTB	T3	L1
sp|P60709|ACTB_HUMAN	QEY[+32]DESGPSIVHR	Actin, cytoplasmic 1 OS=Homo sapiens OX=9606 GN=ACTB PE=1 SV=1	P60709	359	0.00908927	0.00965097	0.00903893	0.0100919	0.00801809	0.00957714	0.00757225	0.00842241	0.00899247	ACTB	ACTB_Y[+32]362	362	ACTB	T3	L1
sp|P60709|ACTB_HUMAN	TTGIVMDSGDGVTH[+16]TVPIYEGYALPHAILR	Actin, cytoplasmic 1 OS=Homo sapiens OX=9606 GN=ACTB PE=1 SV=1	P60709	147	0.115276	0.11491	0.110049	0.109696	0.201516	0.119809	0.148153	0.10928	0.122911	ACTB	ACTB_H[+16]161	161	ACTB	T3	L1
sp|P60709|ACTB_HUMAN	DLTDYLMK[+16]	Actin, cytoplasmic 1 OS=Homo sapiens OX=9606 GN=ACTB PE=1 SV=1	P60709	183	0.165634	0.139217	0.11923	0.105072	0.26911	0.203645	0.193854	0.201286	0.190356	ACTB	ACTB_K[+16]191	191	ACTB	T3	L1
sp|P60709|ACTB_HUMAN	HQGVM[+16]VGMGQK	Actin, cytoplasmic 1 OS=Homo sapiens OX=9606 GN=ACTB PE=1 SV=1	P60709	39	0.103856	0.0793592	0.0349181	0.119736	0.194222	0.122711	0.142175	0.126614	0.0971796	ACTB	ACTB_M[+16]44	44	ACTB	T3	L1
sp|P60709|ACTB_HUMAN	TTGIVM[+16]DSGDGVTHTVPIYEGYALPHAILR	Actin, cytoplasmic 1 OS=Homo sapiens OX=9606 GN=ACTB PE=1 SV=1	P60709	147	0.145338	0.142487	0.142418	0.139034	0.246625	0.149318	0.191557	0.1363	0.153279	ACTB	ACTB_M[+16]153	153	ACTB	T3	L1
sp|P60709|ACTB_HUMAN	IW[+32]HHTFYNELR	Actin, cytoplasmic 1 OS=Homo sapiens OX=9606 GN=ACTB PE=1 SV=1	P60709	84	0.0209351	0.024128	0.0181035	0.0200002	0.020334	0.0201278	0.0190345	0.025457	0.0326396	ACTB	ACTB_W[+32]86	86	ACTB	T3	L1
sp|P60709|ACTB_HUMAN	M[+16]TQIMFETFNTPAMYVAIQAVLSLYASGR	Actin, cytoplasmic 1 OS=Homo sapiens OX=9606 GN=ACTB PE=1 SV=1	P60709	118	0.0322728	0.10256	0.139543	0.066497	0.243258	0.204142	0.170931	0.0668249	0.258337	ACTB	ACTB_M[+16]119	119	ACTB	T3	L1
sp|P60709|ACTB_HUMAN	DLTDY[+32]LMK	Actin, cytoplasmic 1 OS=Homo sapiens OX=9606 GN=ACTB PE=1 SV=1	P60709	183	0.0087431	0.00872268	0.030773	0.0102537	0.00481384	0.00907866	0.00620134	0.00256298	0.00930568	ACTB	ACTB_Y[+32]188	188	ACTB	T3	L1
sp|P60709|ACTB_HUMAN	DSY[+32]VGDEAQSK	Actin, cytoplasmic 1 OS=Homo sapiens OX=9606 GN=ACTB PE=1 SV=1	P60709	50	0.0510582	0.0470939	0.0483128	0.0682753	0.50741	0.0513417	0.0410628	0.0545474	0.0555063	ACTB	ACTB_Y[+32]53	53	ACTB	T3	L1
sp|P60709|ACTB_HUMAN	MTQIM[+16]FETFNTPAMYVAIQAVLSLYASGR	Actin, cytoplasmic 1 OS=Homo sapiens OX=9606 GN=ACTB PE=1 SV=1	P60709	118	0.128732	0.057919	0.253907	0.161021	0.163933	0.0659988	0.16481	0.229414	0.117611	ACTB	ACTB_M[+16]123	123	ACTB	T3	L1
sp|P60842|IF4A1_HUMAN	VVM[+32]ALGDYMGASCHACIGGTNVR	Eukaryotic initiation factor 4A-I OS=Homo sapiens OX=9606 GN=EIF4A1 PE=1 SV=1	P60842	118	0.173275	0.0534406	0.021901	0.0136177	0.302647	0.130511	0	0.0504384	0.0678806	IF4A1	IF4A1_M[+32]121	121	EIF4A1	T3	L1
sp|P60842|IF4A1_HUMAN	GIYAY[+32]GFEKPSAIQQR	Eukaryotic initiation factor 4A-I OS=Homo sapiens OX=9606 GN=EIF4A1 PE=1 SV=1	P60842	45	0.000755398	0.0116248	0	0	0.00263166	0.00046691	0.0330093	0.00191849	0	IF4A1	IF4A1_Y[+32]50	50	EIF4A1	T3	L1
sp|P61019|RAB2A_HUMAN	QHSNSNM[+16]VIMLIGNK	Ras-related protein Rab-2A OS=Homo sapiens OX=9606 GN=RAB2A PE=1 SV=1	P61019	105	0.00238628	0.00339712	0.000434333	0.000947939	0.0372699	0.133917	0.000985757	0.00691134	0.0159851	RAB2A	RAB2A_M[+16]112	112	RAB2A	T3	OUT
sp|P61019|RAB2A_HUMAN	DTFNHLTTW[+32]LEDAR	Ras-related protein Rab-2A OS=Homo sapiens OX=9606 GN=RAB2A PE=1 SV=1	P61019	91	0.0101479	0.0123883	0.0155183	0.00786395	0.0112117	0.0177806	0.00853307	0.013944	0.0505998	RAB2A	RAB2A_W[+32]100	100	RAB2A	T3	OUT
sp|P61019|RAB2A_HUMAN	QHSNSNMVIM[+16]LIGNK	Ras-related protein Rab-2A OS=Homo sapiens OX=9606 GN=RAB2A PE=1 SV=1	P61019	105	0.0400613	0.0149409	0.204469	0.0358382	0.0729917	0.0341652	0.243643	0.0220679	0.011114	RAB2A	RAB2A_M[+16]115	115	RAB2A	T3	OUT
sp|P61019|RAB2A_HUMAN	LQIW[+16]DTAGQESFR	Ras-related protein Rab-2A OS=Homo sapiens OX=9606 GN=RAB2A PE=1 SV=1	P61019	56	0.0280204	0.05591	0.0257532	0.0190746	0.0209696	0.0299574	0.0166305	0.0220288	0.0145452	RAB2A	RAB2A_W[+16]60	60	RAB2A	T3	OUT
sp|P61106|RAB14_HUMAN	LQIW[+32]DTAGQER	Ras-related protein Rab-14 OS=Homo sapiens OX=9606 GN=RAB14 PE=1 SV=4	P61106	61	0.048949	0.0468263	0.0391359	0.119313	0.0338845	0.0325521	0.0270843	0.0336771	0.0364496	RAB14	RAB14_W[+32]65	65	RAB14	T3	OUT
sp|P61106|RAB14_HUMAN	GAAGALM[+16]VYDITR	Ras-related protein Rab-14 OS=Homo sapiens OX=9606 GN=RAB14 PE=1 SV=4	P61106	82	0.365636	0.571934	0.420285	0.604947	0.680493	0.600687	0.644899	0.521374	0.335297	RAB14	RAB14_M[+16]89	89	RAB14	T3	OUT
sp|P61106|RAB14_HUMAN	LQIW[+16]DTAGQER	Ras-related protein Rab-14 OS=Homo sapiens OX=9606 GN=RAB14 PE=1 SV=4	P61106	61	0.0144285	0.0145596	0.0154363	0.0631522	0.0170185	0.0123424	0.0116071	0.019017	0.0201648	RAB14	RAB14_W[+16]65	65	RAB14	T3	OUT
sp|P61106|RAB14_HUMAN	F[+16]MADCPHTIGVEFGTR	Ras-related protein Rab-14 OS=Homo sapiens OX=9606 GN=RAB14 PE=1 SV=4	P61106	35	0.178703	0.209512	0.19385	0.17939	0.412613	0.220542	0.275293	0.152847	0.166111	RAB14	RAB14_F[+16]36	36	RAB14	T3	OUT
sp|P61158|ARP3_HUMAN	YAVWFGGSM[+16]LASTPEFYQVCHTK	Actin-related protein 3 OS=Homo sapiens OX=9606 GN=ACTR3 PE=1 SV=3	P61158	374	0.142617	0.233682	0.134565	0.113397	0.147693	0.124403	0	0.114096	0.184113	ARP3	ARP3_M[+16]383	383	ACTR3	T3	OUT
sp|P61158|ARP3_HUMAN	YAVWF[+16]GGSMLASTPEFYQVCHTK	Actin-related protein 3 OS=Homo sapiens OX=9606 GN=ACTR3 PE=1 SV=3	P61158	374	0.137485	0.233641	0.129495	0.112916	0.147675	0.12485	0.144603	0.112548	0.184565	ARP3	ARP3_F[+16]379	379	ACTR3	T3	OUT
sp|P61158|ARP3_HUMAN	FM[+16]EQVIFK	Actin-related protein 3 OS=Homo sapiens OX=9606 GN=ACTR3 PE=1 SV=3	P61158	91	0.431054	0.130005	0.0964174	0.17461	0.274773	0.208108	0.191045	0.12965	0.146903	ARP3	ARP3_M[+16]93	93	ACTR3	T3	OUT
sp|P61158|ARP3_HUMAN	F[+16]MEQVIFK	Actin-related protein 3 OS=Homo sapiens OX=9606 GN=ACTR3 PE=1 SV=3	P61158	91	0.0956975	0.15879	0.0355268	0.174652	0.275057	0.237476	0.037708	0.169112	0.17334	ARP3	ARP3_F[+16]92	92	ACTR3	T3	OUT
sp|P61619|S61A1_HUMAN	GM[+16]EFEGAIIALFHLLATRTDKVR	Protein transport protein Sec61 subunit alpha isoform 1 OS=Homo sapiens OX=9606 GN=SEC61A1 PE=1 SV=2	P61619	205	0.113303	0.0687345	0.134227	0.208339	0.224094	0.15224	0.15787	0.257756	0.119458	S61A1	S61A1_M[+16]207	207	SEC61A1	T3	OUT
sp|P62491|RB11A_HUMAN	AQIW[+32]DTAGQER	Ras-related protein Rab-11A OS=Homo sapiens OX=9606 GN=RAB11A PE=1 SV=3	P62491	61	0.0369971	0.10313	0.0861581	0.16536	0.0875087	0.055848	0.147058	0.0780895	0.069139	RB11A	RB11A_W[+32]65	65	RAB11A	T3	OUT
sp|P62826|RAN_HUMAN	SNY[+32]NFEKPFLWLAR	GTP-binding nuclear protein Ran OS=Homo sapiens OX=9606 GN=RAN PE=1 SV=3	P62826	152	0.0831609	0.0690922	0.0763974	0.054987	0.0575905	0.115593	0.0765259	0.038545	0.0312862	RAN	RAN_Y[+32]155	155	RAN	T3	OUT
sp|P68104|EF1A1_HUMAN	IGYNPDTVAFVPISGWNGDNM[+16]LEPSANMPWFK	Elongation factor 1-alpha 1 OS=Homo sapiens OX=9606 GN=EEF1A1 PE=1 SV=1	P68104	180	0.0626287	0.115021	0.132896	0.12654	0.112136	0.127715	0.0946348	0.0871455	0.179342	EF1A1	EF1A1_M[+16]201	201	EEF1A1	T3	OUT
sp|P68104|EF1A1_HUMAN	KIGYNPDTVAFVPISGWNGDNMLEPSANM[+16]PWFK	Elongation factor 1-alpha 1 OS=Homo sapiens OX=9606 GN=EEF1A1 PE=1 SV=1	P68104	179	0.106968	0.0739577	0.0704769	0.0655844	0.109957	0.0672687	0.091583	0.078851	0.0764301	EF1A1	EF1A1_M[+16]208	208	EEF1A1	T3	OUT
sp|P68104|EF1A1_HUMAN	SGDAAIVDMVPGKP[+16]MCVESFSDYPPLGR	Elongation factor 1-alpha 1 OS=Homo sapiens OX=9606 GN=EEF1A1 PE=1 SV=1	P68104	395	0.104586	0.0898383	0.0624369	0.165551	0.131204	0.0626862	0.0577058	0.122317	0.0837219	EF1A1	EF1A1_P[+16]409	409	EEF1A1	T3	OUT
sp|P68104|EF1A1_HUMAN	SGDAAIVDMVPGKPM[+16]CVESFSDYPPLGR	Elongation factor 1-alpha 1 OS=Homo sapiens OX=9606 GN=EEF1A1 PE=1 SV=1	P68104	395	0.104586	0.0901907	0.0626308	0.164971	0.130684	0.0624718	0.133267	0.150239	0.0837074	EF1A1	EF1A1_M[+16]410	410	EEF1A1	T3	OUT
sp|P68104|EF1A1_HUMAN	SGDAAIVDMVPGKPM[+32]CVESFSDYPPLGR	Elongation factor 1-alpha 1 OS=Homo sapiens OX=9606 GN=EEF1A1 PE=1 SV=1	P68104	395	0.0224078	0.00384791	0.00949939	0.0288206	0.102849	0.027736	0.0799278	0.00367171	0.0219591	EF1A1	EF1A1_M[+32]410	410	EEF1A1	T3	OUT
sp|P68104|EF1A1_HUMAN	KIGYNPDTVAFVP[+16]ISGWNGDNMLEPSANMPWFK	Elongation factor 1-alpha 1 OS=Homo sapiens OX=9606 GN=EEF1A1 PE=1 SV=1	P68104	179	0.021324	0.0151255	0.000286579	0.0158607	0.0169135	0.00903175	0.0164498	0.00823479	0.0183248	EF1A1	EF1A1_P[+16]192	192	EEF1A1	T3	OUT
sp|P68104|EF1A1_HUMAN	IGYNPDTVAFVPISGWNGDNM[+32]LEPSANMPWFK	Elongation factor 1-alpha 1 OS=Homo sapiens OX=9606 GN=EEF1A1 PE=1 SV=1	P68104	180	0.0137759	0.0291215	0.00013807	0.0358912	0.00294992	0.0399825	0.0147299	0.0120546	0.0465043	EF1A1	EF1A1_M[+32]201	201	EEF1A1	T3	OUT
sp|P68104|EF1A1_HUMAN	IGYNPDTVAFVPISGWNGDNMLEPSANM[+32]PWFK	Elongation factor 1-alpha 1 OS=Homo sapiens OX=9606 GN=EEF1A1 PE=1 SV=1	P68104	180	0.0137954	0.0335645	4.60088e-05	0.0358773	0.0392817	0.104508	0.0144768	0.0120748	0.0464752	EF1A1	EF1A1_M[+32]208	208	EEF1A1	T3	OUT
sp|P68104|EF1A1_HUMAN	SGDAAIVDM[+16]VPGKPMCVESFSDYPPLGR	Elongation factor 1-alpha 1 OS=Homo sapiens OX=9606 GN=EEF1A1 PE=1 SV=1	P68104	395	0.123183	0.0761158	0.0553121	0.136802	0.135978	0.138713	0.168593	0.124772	0.0578506	EF1A1	EF1A1_M[+16]404	404	EEF1A1	T3	OUT
sp|P68104|EF1A1_HUMAN	SGDAAIVDM[+32]VPGKPMCVESFSDYPPLGR	Elongation factor 1-alpha 1 OS=Homo sapiens OX=9606 GN=EEF1A1 PE=1 SV=1	P68104	395	0.0297851	0.00342515	0.000174297	0.0290511	0.102872	0.0115458	0.0799303	0.00702217	0.0219591	EF1A1	EF1A1_M[+32]404	404	EEF1A1	T3	OUT
sp|P68104|EF1A1_HUMAN	SGDAAIVDMVP[+16]GKPMCVESFSDYPPLGR	Elongation factor 1-alpha 1 OS=Homo sapiens OX=9606 GN=EEF1A1 PE=1 SV=1	P68104	395	0.0016209	0.0895802	0.000299115	0.00208692	0.000783602	0.0218174	0.000586992	0.115113	0.0410775	EF1A1	EF1A1_P[+16]406	406	EEF1A1	T3	OUT
sp|P68363|TBA1B_HUMAN	LADQCTGLQGFLVFHSFGGGTGSGFTSLLM[+16]ER	Tubulin alpha-1B chain OS=Homo sapiens OX=9606 GN=TUBA1B PE=1 SV=1	P68363	124	0.0847333	0.244669	0.192003	0.139133	0.135125	0.103243	0.088715	0.0946831	0.117467	TBA1B	TBA1B_M[+16]154	154	TUBA1B	T3	OUT
sp|Q05639|EF1A2_HUMAN	SGDAAIVEMVPGKP[+16]MCVESFSQYPPLGR	Elongation factor 1-alpha 2 OS=Homo sapiens OX=9606 GN=EEF1A2 PE=1 SV=1	Q05639	395	0.0353068	0.0724207	0.000481071	0.141987	0.204377	0.0635165	0.00888629	0.00965802	0.0106763	EF1A2	EF1A2_P[+16]409	409	EEF1A2	T3	OUT
sp|Q05639|EF1A2_HUMAN	SGDAAIVEM[+16]VPGKPMCVESFSQYPPLGR	Elongation factor 1-alpha 2 OS=Homo sapiens OX=9606 GN=EEF1A2 PE=1 SV=1	Q05639	395	0.00798061	0.00769393	0.00483777	0.00641708	0.161786	0.00503898	0.0188789	0.166937	0.0159762	EF1A2	EF1A2_M[+16]404	404	EEF1A2	T3	OUT
sp|Q05639|EF1A2_HUMAN	IGYNPATVPFVPISGWHGDNMLEPSP[+16]NMPWFK	Elongation factor 1-alpha 2 OS=Homo sapiens OX=9606 GN=EEF1A2 PE=1 SV=1	Q05639	180	0.307764	0.0804055	0.0501249	0.0863492	0.212153	0.0937835	0.0784906	0.19799	0.115391	EF1A2	EF1A2_P[+16]206	206	EEF1A2	T3	OUT
sp|Q05639|EF1A2_HUMAN	SGDAAIVEMVPGKPMCVESF[+32]SQYPPLGR	Elongation factor 1-alpha 2 OS=Homo sapiens OX=9606 GN=EEF1A2 PE=1 SV=1	Q05639	395	0.691582	0.306956	0.16484	0.142182	0.019612	0.412044	0.204796	0.0038803	0.345874	EF1A2	EF1A2_F[+32]415	415	EEF1A2	T3	OUT
sp|Q05639|EF1A2_HUMAN	IGYNPATVPFVPISGWHGDNMLEPSPNM[+16]PWFK	Elongation factor 1-alpha 2 OS=Homo sapiens OX=9606 GN=EEF1A2 PE=1 SV=1	Q05639	180	0.307764	0.0803164	0.0502447	0.0866741	0.216116	0.0937835	0.0783689	0.19799	0.116438	EF1A2	EF1A2_M[+16]208	208	EEF1A2	T3	OUT
sp|Q12797|ASPH_HUMAN	GHFASVW[+32]QR	Aspartyl/asparaginyl beta-hydroxylase OS=Homo sapiens OX=9606 GN=ASPH PE=1 SV=3	Q12797	553	0.173659	0.381824	0.318885	0.7218	0.160205	0.652891	0.251201	0.0985438	0.185234	ASPH	ASPH_W[+32]560	560	ASPH	T3	OUT
sp|Q12907|LMAN2_HUMAN	LFQLM[+16]VEHTPDEESIDWTK	Vesicular integral-membrane protein VIP36 OS=Homo sapiens OX=9606 GN=LMAN2 PE=1 SV=1	Q12907	272	0.020457	0.014311	0.0214	0.0273817	0.053537	0.026182	0.0359267	0.035114	0.0308606	LMAN2	LMAN2_M[+16]277	277	LMAN2	T3	OUT
sp|Q12907|LMAN2_HUMAN	EHSLIKPYQGVGSSSMPLWDFQGSTM[+16]LTSQYVR	Vesicular integral-membrane protein VIP36 OS=Homo sapiens OX=9606 GN=LMAN2 PE=1 SV=1	Q12907	56	0.11811	0.146304	0.0816583	0.148203	0.268613	0.152821	0.207321	0.124093	0.0944687	LMAN2	LMAN2_M[+16]82	82	LMAN2	T3	OUT
sp|Q12907|LMAN2_HUMAN	EHSLIKPY[+32]QGVGSSSMPLWDFQGSTMLTSQYVR	Vesicular integral-membrane protein VIP36 OS=Homo sapiens OX=9606 GN=LMAN2 PE=1 SV=1	Q12907	56	0.0292863	0.0329927	0.0349733	0.0287404	0.0207779	0.0281058	0.0312248	0.0298679	0.043232	LMAN2	LMAN2_Y[+32]64	64	LMAN2	T3	OUT
sp|Q12907|LMAN2_HUMAN	EHSLIKPYQGVGSSSMPLW[+32]DFQGSTMLTSQYVR	Vesicular integral-membrane protein VIP36 OS=Homo sapiens OX=9606 GN=LMAN2 PE=1 SV=1	Q12907	56	0.0258517	0.0309147	0.0247718	0.0255585	0.0161593	0.0252732	0.0229533	0.0244649	0.040281	LMAN2	LMAN2_W[+32]75	75	LMAN2	T3	OUT
sp|Q12907|LMAN2_HUMAN	NLHGDGIALW[+32]YTR	Vesicular integral-membrane protein VIP36 OS=Homo sapiens OX=9606 GN=LMAN2 PE=1 SV=1	Q12907	126	0.0584817	0.0566621	0.0463814	0.0365706	0.0377453	0.0626151	0.00957817	0.0462482	0.0622593	LMAN2	LMAN2_W[+32]136	136	LMAN2	T3	OUT
sp|Q12907|LMAN2_HUMAN	EHSLIKPYQGVGSSSMP[+16]LWDFQGSTMLTSQYVR	Vesicular integral-membrane protein VIP36 OS=Homo sapiens OX=9606 GN=LMAN2 PE=1 SV=1	Q12907	56	0.134856	0.084278	0.158876	0.147767	0.166183	0.181234	0.142442	0.125947	0.113247	LMAN2	LMAN2_P[+16]73	73	LMAN2	T3	OUT
sp|Q12907|LMAN2_HUMAN	EHSLIKPYQGVGSSSM[+32]PLWDFQGSTMLTSQYVR	Vesicular integral-membrane protein VIP36 OS=Homo sapiens OX=9606 GN=LMAN2 PE=1 SV=1	Q12907	56	0.0292876	0.0358172	0.0329036	0.029611	0.0207631	0.0281109	0.0217369	0.0298714	0.040283	LMAN2	LMAN2_M[+32]72	72	LMAN2	T3	OUT
sp|Q12907|LMAN2_HUMAN	EHSLIKPYQGVGSSSMPLWDF[+32]QGSTMLTSQYVR	Vesicular integral-membrane protein VIP36 OS=Homo sapiens OX=9606 GN=LMAN2 PE=1 SV=1	Q12907	56	0.0111402	0.0309081	0.0248767	0.0247376	0.0177144	0.025184	0.023002	0.0261053	0.0378332	LMAN2	LMAN2_F[+32]77	77	LMAN2	T3	OUT
sp|Q12907|LMAN2_HUMAN	EHSLIKPYQGVGSSSM[+16]PLWDFQGSTMLTSQYVR	Vesicular integral-membrane protein VIP36 OS=Homo sapiens OX=9606 GN=LMAN2 PE=1 SV=1	Q12907	56	0.182973	0.073941	0.112115	0.120375	0.118395	0.151247	0.0964148	0.103125	0.103475	LMAN2	LMAN2_M[+16]72	72	LMAN2	T3	OUT
sp|Q13283|G3BP1_HUMAN	F[+16]MQTFVLAPEGSVANK	Ras GTPase-activating protein-binding protein 1 OS=Homo sapiens OX=9606 GN=G3BP1 PE=1 SV=1	Q13283	107	0.13375	0.11058	0.141497	0.110285	0.324503	0.310771	0.198631	0.151341	0.230439	G3BP1	G3BP1_F[+16]108	108	G3BP1	T3	L2
sp|Q14108|SCRB2_HUMAN	FVSAIEGMHPNQEDH[+16]ETFVDINPLTGIILK	Lysosome membrane protein 2 OS=Homo sapiens OX=9606 GN=SCARB2 PE=1 SV=2	Q14108	348	0.0146617	0.187482	0.00452286	0.00793915	0.0614355	0.0110739	0.0231935	0.0479345	0.0317669	SCRB2	SCRB2_H[+16]363	363	SCARB2	T3	L2
sp|Q14204|DYHC1_HUMAN	DVLLVAQGEM[+16]ALEEFLK	Cytoplasmic dynein 1 heavy chain 1 OS=Homo sapiens OX=9606 GN=DYNC1H1 PE=1 SV=5	Q14204	1447	0.436424	0.599664	0.744472	0.38298	0.456838	0.486186	0.440204	0.577968	0.48051	DYHC1	DYHC1_M[+16]1457	1457	DYNC1H1	T3	OUT
sp|Q14204|DYHC1_HUMAN	EW[+32]TDGLFTHVLR	Cytoplasmic dynein 1 heavy chain 1 OS=Homo sapiens OX=9606 GN=DYNC1H1 PE=1 SV=5	Q14204	2273	0.0285031	0.0555403	0.0292771	0.0242909	0.0183312	0.0180918	0.583531	0.0297797	0.0257184	DYHC1	DYHC1_W[+32]2275	2275	DYNC1H1	T3	OUT
sp|Q14204|DYHC1_HUMAN	VLQLY[+32]QITQINHGLMMVGPSGSGK	Cytoplasmic dynein 1 heavy chain 1 OS=Homo sapiens OX=9606 GN=DYNC1H1 PE=1 SV=5	Q14204	2206	0.00605253	0.0483624	0.0257399	0.0476073	0.0426461	0.00964435	0.0735514	0.0228775	0.0163301	DYHC1	DYHC1_Y[+32]2211	2211	DYNC1H1	T3	OUT
sp|Q14204|DYHC1_HUMAN	VLQLYQITQINHGLM[+16]MVGPSGSGK	Cytoplasmic dynein 1 heavy chain 1 OS=Homo sapiens OX=9606 GN=DYNC1H1 PE=1 SV=5	Q14204	2206	0.176184	0.279087	0.227897	0.268826	0.28063	0.257468	0.267404	0.252843	0.265555	DYHC1	DYHC1_M[+16]2221	2221	DYNC1H1	T3	OUT
sp|Q14204|DYHC1_HUMAN	VLQLYQITQINHGLMM[+16]VGPSGSGK	Cytoplasmic dynein 1 heavy chain 1 OS=Homo sapiens OX=9606 GN=DYNC1H1 PE=1 SV=5	Q14204	2206	0.175241	0.273143	0.188445	0.268675	0.276267	0.313919	0.26751	0.233747	0.265058	DYHC1	DYHC1_M[+16]2222	2222	DYNC1H1	T3	OUT
sp|Q14697|GANAB_HUMAN	YSLLPF[+32]WYTLLYQAHR	Neutral alpha-glucosidase AB OS=Homo sapiens OX=9606 GN=GANAB PE=1 SV=3	Q14697	704	0.0154887	0.0431168	0.0302675	0.0181083	0.0172221	0.0225895	0.0228869	0.0352294	0.0256587	GANAB	GANAB_F[+32]710	710	GANAB	T3	OUT
sp|Q14697|GANAB_HUMAN	FSFSGNTLVSSSADPEGHFETPIW[+32]IER	Neutral alpha-glucosidase AB OS=Homo sapiens OX=9606 GN=GANAB PE=1 SV=3	Q14697	864	0.0106605	0.0183286	0.00821075	0.0103515	0.0254084	0.022216	0.0222532	0.00659279	0.0304431	GANAB	GANAB_W[+32]888	888	GANAB	T3	OUT
sp|Q14697|GANAB_HUMAN	DAQHYGGW[+32]EHR	Neutral alpha-glucosidase AB OS=Homo sapiens OX=9606 GN=GANAB PE=1 SV=3	Q14697	558	0.331051	0.254292	0.285651	0.25664	0.311006	0.299855	0.16775	0.320805	0.364311	GANAB	GANAB_W[+32]566	566	GANAB	T3	OUT
sp|Q14697|GANAB_HUMAN	THSDSKPYGPMSVGLDFSLP[+16]GMEHVYGIPEHADNLR	Neutral alpha-glucosidase AB OS=Homo sapiens OX=9606 GN=GANAB PE=1 SV=3	Q14697	231	0.182987	0.319772	0.171969	0.0042353	0.0849705	0.0694288	0.0526747	0.0348805	0.0693419	GANAB	GANAB_P[+16]251	251	GANAB	T3	OUT
sp|Q14697|GANAB_HUMAN	W[+16]MSETGIIDVFLLLGPSISDVFR	Neutral alpha-glucosidase AB OS=Homo sapiens OX=9606 GN=GANAB PE=1 SV=3	Q14697	354	0.179682	0.21215	0.481781	0.0944442	0.21074	0.405571	0.126192	0.571004	0.245212	GANAB	GANAB_W[+16]355	355	GANAB	T3	OUT
sp|Q15836|VAMP3_HUMAN	LQQTQNQVDEVVDIM[+16]R	Vesicle-associated membrane protein 3 OS=Homo sapiens OX=9606 GN=VAMP3 PE=1 SV=3	Q15836	14	0.092347	0.0816623	0.107188	0.133531	0.406215	0.188818	0.200687	0.111147	0.207434	VAMP3	VAMP3_M[+16]29	29	VAMP3	T3	L2
sp|Q16678|CP1B1_HUMAN	AIHQALVQQGSAFADRPAFASF[+16]R	Cytochrome P450 1B1 OS=Homo sapiens OX=9606 GN=CYP1B1 PE=1 SV=2	Q16678	101	0.313859	0.211677	0.387635	0.428785	0.48016	0.475627	0.393328	0.277633	0.0675862	CP1B1	CP1B1_F[+16]123	123	CYP1B1	T3	OUT
sp|Q16678|CP1B1_HUMAN	AIHQALVQQGSAFADRPAF[+16]ASFR	Cytochrome P450 1B1 OS=Homo sapiens OX=9606 GN=CYP1B1 PE=1 SV=2	Q16678	101	0.537134	0.782546	0.571247	0.461146	0.403903	0.42715	0.591811	0.660352	0.78437	CP1B1	CP1B1_F[+16]120	120	CYP1B1	T3	OUT
sp|Q6DD88|ATLA3_HUMAN	DIYY[+16]NNMEEVCGGEKPYLSPDILEEK	Atlastin-3 OS=Homo sapiens OX=9606 GN=ATL3 PE=1 SV=1	Q6DD88	360	0.0949471	0.0555897	0.12541	0.0765686	0.168615	0.138297	0.115393	0.0111838	0.0988978	ATLA3	ATLA3_Y[+16]364	364	ATL3	T3	OUT
sp|Q6DD88|ATLA3_HUMAN	DIYYNNM[+16]EEVCGGEKPYLSPDILEEK	Atlastin-3 OS=Homo sapiens OX=9606 GN=ATL3 PE=1 SV=1	Q6DD88	360	0.0949243	0.289829	0.125323	0.220386	0.168546	0.138591	0.10431	0.0762796	0.210765	ATLA3	ATLA3_M[+16]367	367	ATL3	T3	OUT
sp|Q96A33|CCD47_HUMAN	NKDPITIVDVPAHLQNSWESYYLEILMVTGLLAYIM[+16]NYIIGK	Coiled-coil domain-containing protein 47 OS=Homo sapiens OX=9606 GN=CCDC47 PE=1 SV=1	Q96A33	115	0.0162974	0.0268302	0.00066475	0.0118713	0.0229695	0.051287	0.0174862	0	0.00154025	CCD47	CCD47_M[+16]151	151	CCDC47	T3	OUT
sp|Q96A33|CCD47_HUMAN	DM[+16]EALLPLMNMVIYSIDK	Coiled-coil domain-containing protein 47 OS=Homo sapiens OX=9606 GN=CCDC47 PE=1 SV=1	Q96A33	374	0.140778	0.288714	0.13253	0.136676	0.197422	0.142087	0.208448	0.283787	0.209561	CCD47	CCD47_M[+16]376	376	CCDC47	T3	OUT
sp|Q96A33|CCD47_HUMAN	NKDPITIVDVPAHLQNSWESYYLEILM[+16]VTGLLAYIMNYIIGK	Coiled-coil domain-containing protein 47 OS=Homo sapiens OX=9606 GN=CCDC47 PE=1 SV=1	Q96A33	115	0.11767	0.0243975	0.000854675	0.121189	0.181762	0.244031	0.00416934	0.136291	0.000174158	CCD47	CCD47_M[+16]142	142	CCDC47	T3	OUT
sp|Q96A33|CCD47_HUMAN	NKDPITIVDVPAHLQNSW[+32]ESYYLEILMVTGLLAYIMNYIIGK	Coiled-coil domain-containing protein 47 OS=Homo sapiens OX=9606 GN=CCDC47 PE=1 SV=1	Q96A33	115	0.00322837	0.0177329	0.00322694	0.0108465	0.00705631	0.0016732	0.0025784	0.0117839	0.00687056	CCD47	CCD47_W[+32]133	133	CCDC47	T3	OUT
sp|Q96A33|CCD47_HUMAN	NKDPITIVDVPAHLQNSWESYYLEILMVTGLLAYIMNY[+16]IIGK	Coiled-coil domain-containing protein 47 OS=Homo sapiens OX=9606 GN=CCDC47 PE=1 SV=1	Q96A33	115	0.0158413	0	0.692343	0.0127191	0.0165055	0.0542006	0.000998972	0.000802448	8.04677e-05	CCD47	CCD47_Y[+16]153	153	CCDC47	T3	OUT
sp|Q96A33|CCD47_HUMAN	DMEALLPLMNM[+16]VIYSIDK	Coiled-coil domain-containing protein 47 OS=Homo sapiens OX=9606 GN=CCDC47 PE=1 SV=1	Q96A33	374	0.0898645	0.106643	0.0371117	0.170027	0.195652	0.138816	0.0409708	0.0442866	0.137354	CCD47	CCD47_M[+16]385	385	CCDC47	T3	OUT
sp|Q96A33|CCD47_HUMAN	NKDPITIVDVPAHLQNSWESY[+32]YLEILMVTGLLAYIMNYIIGK	Coiled-coil domain-containing protein 47 OS=Homo sapiens OX=9606 GN=CCDC47 PE=1 SV=1	Q96A33	115	0.00322925	0.00429931	0.00322569	0.0102774	0.00431902	0.00167206	0.00259273	0.0117832	0.00688274	CCD47	CCD47_Y[+32]136	136	CCDC47	T3	OUT
sp|Q9BVK6|TMED9_HUMAN	EEYQPATPGLGM[+16]FVEVKDPEDK	Transmembrane emp24 domain-containing protein 9 OS=Homo sapiens OX=9606 GN=TMED9 PE=1 SV=2	Q9BVK6	73	0.159743	0.350824	0.334537	0.103128	0.273658	0.134283	0.107453	0.391678	0.0996039	TMED9	TMED9_M[+16]85	85	TMED9	T3	OUT
sp|Q9BVK6|TMED9_HUMAN	CFIEEIPDETM[+16]VIGNYR	Transmembrane emp24 domain-containing protein 9 OS=Homo sapiens OX=9606 GN=TMED9 PE=1 SV=2	Q9BVK6	48	0.103953	0.14306	0.0584035	0.0098907	0.172334	0.125456	0.11003	0.0758763	0.0698605	TMED9	TMED9_M[+16]59	59	TMED9	T3	OUT
sp|Q9BWM7|SFXN3_HUMAN	W[+32]DQSTFLGR	Sideroflexin-3 OS=Homo sapiens OX=9606 GN=SFXN3 PE=1 SV=3	Q9BWM7	14	0.406929	0.105431	0.080953	0.0183815	0.385761	0.366417	0.110944	0.05097	0.0269307	SFXN3	SFXN3_W[+32]15	15	SFXN3	T3	OUT
sp|Q9H3N1|TMX1_HUMAN	VITDENW[+32]R	Thioredoxin-related transmembrane protein 1 OS=Homo sapiens OX=9606 GN=TMX1 PE=1 SV=1	Q9H3N1	32	0.0352375	0.116736	0.109839	0.0537158	0.0463856	0.190067	0.184862	0.10186	0.0414999	TMX1	TMX1_W[+32]39	39	TMX1	T3	OUT
sp|Q9H3N1|TMX1_HUMAN	DFINFISDKEW[+32]K	Thioredoxin-related transmembrane protein 1 OS=Homo sapiens OX=9606 GN=TMX1 PE=1 SV=1	Q9H3N1	121	0.0284559	0.0172614	0.0119102	0.00851371	0.0146262	0.0182376	0.0119742	0.0124051	0.0137906	TMX1	TMX1_W[+32]132	132	TMX1	T3	OUT
sp|Q9H3N1|TMX1_HUMAN	DFINFISDKEW[+16]K	Thioredoxin-related transmembrane protein 1 OS=Homo sapiens OX=9606 GN=TMX1 PE=1 SV=1	Q9H3N1	121	0.0159783	0.0147412	0.00866301	0.00992782	0.0107401	0.0178849	0.0119399	0.0093012	0.010122	TMX1	TMX1_W[+16]132	132	TMX1	T3	OUT
sp|Q9H4M9|EHD1_HUMAN	F[+16]MCAQLPNPVLDSISIIDTPGILSGEK	EH domain-containing protein 1 OS=Homo sapiens OX=9606 GN=EHD1 PE=1 SV=2	Q9H4M9	135	0.200798	0.0998181	0.134656	0.181107	0.292427	0.236899	0.194969	0.179161	0.145899	EHD1	EHD1_F[+16]136	136	EHD1	T3	OUT
sp|Q9HD20|AT131_HUMAN	QFLPVAF[+16]PVGNAFSYYQSNR	Manganese-transporting ATPase 13A1 OS=Homo sapiens OX=9606 GN=ATP13A1 PE=1 SV=2	Q9HD20	187	0.267889	0.226209	0.320472	0.170496	0.2778	0.254121	0.217397	0.218953	0.237702	AT131	AT131_F[+16]194	194	ATP13A1	T3	OUT
sp|Q9NQC3|RTN4_HUMAN	YQFVREP[+16]EDEEEEEEEEEEDEDEDLEELEVLER	Reticulon-4 OS=Homo sapiens OX=9606 GN=RTN4 PE=1 SV=2	Q9NQC3	24	0.00921263	0.0289183	0.0685708	0.0355296	0.0174521	0.0224176	0.0186547	0.0352009	0.0669661	RTN4	RTN4_P[+16]31	31	RTN4	T3	OUT
sp|Q9P0L0|VAPA_HUMAN	FMVQTIFAPPNTSDMEAVW[+32]K	Vesicle-associated membrane protein-associated protein A OS=Homo sapiens OX=9606 GN=VAPA PE=1 SV=3	Q9P0L0	94	0.0188788	0.011654	0.0113385	0.0177146	0.0158208	0.0147369	0.0104941	0.0152825	0.0124702	VAPA	VAPA_W[+32]113	113	VAPA	T3	OUT
sp|Q9P0L0|VAPA_HUMAN	FMVQTIFAPPNTSDM[+16]EAVWK	Vesicle-associated membrane protein-associated protein A OS=Homo sapiens OX=9606 GN=VAPA PE=1 SV=3	Q9P0L0	94	0.117839	0.109572	0.112074	0.116602	0.172549	0.102516	0.122115	0.123301	0.148129	VAPA	VAPA_M[+16]109	109	VAPA	T3	OUT
sp|Q9P0L0|VAPA_HUMAN	F[+16]MVQTIFAPPNTSDMEAVWK	Vesicle-associated membrane protein-associated protein A OS=Homo sapiens OX=9606 GN=VAPA PE=1 SV=3	Q9P0L0	94	0.132498	0.148533	0.137473	0.203443	0.141742	0.240815	0.100235	0.18734	0.287176	VAPA	VAPA_F[+16]95	95	VAPA	T3	OUT
sp|Q9UJS0|CMC2_HUMAN	FGQVTP[+16]MEVDILFQLADLYEPR	Calcium-binding mitochondrial carrier protein Aralar2 OS=Homo sapiens OX=9606 GN=SLC25A13 PE=1 SV=2	Q9UJS0	260	0.132873	0.306899	0.0738942	0.187917	0.202399	0.120657	0.139741	0.18799	0.206841	CMC2	CMC2_P[+16]266	266	SLC25A13	T3	OUT
sp|Q9UJZ1|STML2_HUMAN	NTVVLFVPQQEAW[+32]VVER	Stomatin-like protein 2, mitochondrial OS=Homo sapiens OX=9606 GN=STOML2 PE=1 SV=1	Q9UJZ1	34	0.047791	0.0210924	0.0947981	0.0232515	0.0422866	0.0230849	0.0201366	0.0320599	0.198336	STML2	STML2_W[+32]47	47	STOML2	T3	OUT
sp|O00255|MEN1_HUMAN	EAASLLEAGEERP[+16]GEQSQGTQSQGSALQDPECFAHLLR	Menin OS=Homo sapiens OX=9606 GN=MEN1 PE=1 SV=4	O00255	382	0.383197	0.157865	0.92036	0.147598	0.313065	0.341903	0	0.0390727	0.262596	MEN1	MEN1_P[+16]395	395	MEN1	T4	OUT
sp|O00264|PGRC1_HUMAN	EALKDEY[+32]DDLSDLTAAQQETLSDWESQFTFK	Membrane-associated progesterone receptor component 1 OS=Homo sapiens OX=9606 GN=PGRMC1 PE=1 SV=3	O00264	132	0.0338551	0.0329745	0.0266522	0.029095	0.0195713	0.0312434	0.0231645	0.036681	0.0359074	PGRC1	PGRC1_Y[+32]139	139	PGRMC1	T4	OUT
sp|O14684|PTGES_HUMAN	NDMETIYPFLFLGFVYSFLGPNPFVAW[+16]MHFLVFLVGRVAHTVAYLGK	Prostaglandin E synthase OS=Homo sapiens OX=9606 GN=PTGES PE=1 SV=2	O14684	73	0.029819	0.202573	0.00215316	0.0477575	0.0472301	0.0263709	0.00492495	0.0134515	0.0368622	PTGES	PTGES_W[+16]100	100	PTGES	T4	OUT
sp|O14684|PTGES_HUMAN	SVTY[+32]TLAQLPCASMALQILWEAAR	Prostaglandin E synthase OS=Homo sapiens OX=9606 GN=PTGES PE=1 SV=2	O14684	126	0.0364089	0.0383278	0.036025	0.0464186	0.0327655	0.0123552	0.0365771	0.0454084	0.0394344	PTGES	PTGES_Y[+32]130	130	PTGES	T4	OUT
sp|O14684|PTGES_HUMAN	SVTYTLAQLPCASM[+16]ALQILWEAAR	Prostaglandin E synthase OS=Homo sapiens OX=9606 GN=PTGES PE=1 SV=2	O14684	126	0.101046	0.183137	0.140625	0.0958786	0.157355	0.133537	0.106347	0.116276	0.218866	PTGES	PTGES_M[+16]140	140	PTGES	T4	OUT
sp|O14684|PTGES_HUMAN	NDM[+16]ETIYPFLFLGFVYSFLGPNPFVAWMHFLVFLVGRVAHTVAYLGK	Prostaglandin E synthase OS=Homo sapiens OX=9606 GN=PTGES PE=1 SV=2	O14684	73	0.0552895	0.200411	0.0810974	0.159843	0.175565	0.106141	0.141491	0.0845436	0.12331	PTGES	PTGES_M[+16]76	76	PTGES	T4	OUT
sp|O14684|PTGES_HUMAN	SVTYTLAQLPCASMALQILW[+16]EAAR	Prostaglandin E synthase OS=Homo sapiens OX=9606 GN=PTGES PE=1 SV=2	O14684	126	0.0133429	0.0112828	0.0179274	0.0170225	0.0107389	0.0117971	0.0208392	0.0157006	0.0255726	PTGES	PTGES_W[+16]146	146	PTGES	T4	OUT
sp|O14880|MGST3_HUMAN	YKVEYPIM[+16]YSTDPENGHIFNCIQR	Microsomal glutathione S-transferase 3 OS=Homo sapiens OX=9606 GN=MGST3 PE=1 SV=1	O14880	35	0.0526774	0.0748441	0.0554332	0.0984948	0.165237	0.122143	0.070582	0.0794681	0.088179	MGST3	MGST3_M[+16]43	43	MGST3	T4	OUT
sp|O14880|MGST3_HUMAN	GALGSIALLGLVGTTVCSAF[+32]QHLGWVK	Microsomal glutathione S-transferase 3 OS=Homo sapiens OX=9606 GN=MGST3 PE=1 SV=1	O14880	114	0.102444	0.0191541	0.0179712	0.00431588	0.00918496	0.0177145	0.00901607	0.00754326	0.0128792	MGST3	MGST3_F[+32]134	134	MGST3	T4	OUT
sp|O14880|MGST3_HUMAN	GALGSIALLGLVGTTVCSAFQHLGW[+16]VK	Microsomal glutathione S-transferase 3 OS=Homo sapiens OX=9606 GN=MGST3 PE=1 SV=1	O14880	114	0.00195872	0.00828796	0.0130707	0.0113508	0.00446839	0.00492016	0.0318106	0.00386911	0.0176726	MGST3	MGST3_W[+16]139	139	MGST3	T4	OUT
sp|O14880|MGST3_HUMAN	YKVEYP[+16]IMYSTDPENGHIFNCIQR	Microsomal glutathione S-transferase 3 OS=Homo sapiens OX=9606 GN=MGST3 PE=1 SV=1	O14880	35	0.0178626	0.029122	0.0159574	0.0334464	0.0590095	0.00106441	0.0223598	0.0260626	0.0319019	MGST3	MGST3_P[+16]41	41	MGST3	T4	OUT
sp|O14880|MGST3_HUMAN	GALGSIALLGLVGTTVCSAFQHLGW[+32]VK	Microsomal glutathione S-transferase 3 OS=Homo sapiens OX=9606 GN=MGST3 PE=1 SV=1	O14880	114	0.00272772	0.0191497	0.0169757	0.00998175	0.00917557	0.0125444	0.00917664	0.0161798	0.0134923	MGST3	MGST3_W[+32]139	139	MGST3	T4	OUT
sp|O15173|PGRC2_HUMAN	GLATFCLDKDALRDEYDDLSDLNAVQM[+16]ESVR	Membrane-associated progesterone receptor component 2 OS=Homo sapiens OX=9606 GN=PGRMC2 PE=1 SV=1	O15173	153	0.117602	0.224674	0.164848	0.222075	0.209125	0.106912	0.232561	0.257628	0.214239	PGRC2	PGRC2_M[+16]180	180	PGRMC2	T4	OUT
sp|O43795|MYO1B_HUMAN	EQLLQSNP[+16]VLEAFGNAK	Unconventional myosin-Ib OS=Homo sapiens OX=9606 GN=MYO1B PE=1 SV=3	O43795	139	0.0627185	0.0608858	0.0487682	0.0721622	0.0728438	0.0693131	0.0972943	0.0591244	0.0711988	MYO1B	MYO1B_P[+16]147	147	MYO1B	T4	OUT
sp|O75369|FLNB_HUMAN	VM[+32]YTPMAPGNYLISVK	Filamin-B OS=Homo sapiens OX=9606 GN=FLNB PE=1 SV=2	O75369	2439	0.0390171	0.0825951	0.0718837	0.0606168	0.264883	0.0525299	0.140917	0.0220699	0.0388702	FLNB	FLNB_M[+32]2441	2441	FLNB	T4	OUT
sp|O75369|FLNB_HUMAN	EAM[+16]QQADDWLGVPQVITPEEIIHPDVDEHSVMTYLSQFPK	Filamin-B OS=Homo sapiens OX=9606 GN=FLNB PE=1 SV=2	O75369	199	0.178213	0.0159239	0.0154061	0.204829	0.14806	0.140236	0.162561	0.0578263	0.0661413	FLNB	FLNB_M[+16]202	202	FLNB	T4	OUT
sp|O75369|FLNB_HUMAN	EAMQQADDWLGVPQVITPEEIIHPDVDEHSVM[+32]TYLSQFPK	Filamin-B OS=Homo sapiens OX=9606 GN=FLNB PE=1 SV=2	O75369	199	0.0164123	0.00785865	0.00538927	0.0421172	0.0337146	0.0446866	0.00965042	0.0347222	0.0383577	FLNB	FLNB_M[+32]231	231	FLNB	T4	OUT
sp|O75369|FLNB_HUMAN	EAMQQADDWLGVPQVITPEEIIHP[+16]DVDEHSVMTYLSQFPK	Filamin-B OS=Homo sapiens OX=9606 GN=FLNB PE=1 SV=2	O75369	199	0.0434136	0.0366706	0.0285389	0.0656475	0.123323	0.0558547	0.0479521	0.0421135	0.049846	FLNB	FLNB_P[+16]223	223	FLNB	T4	OUT
sp|O75369|FLNB_HUMAN	VMYTP[+16]MAPGNYLISVK	Filamin-B OS=Homo sapiens OX=9606 GN=FLNB PE=1 SV=2	O75369	2439	0.460049	0.246403	0.291641	0.407391	0.409134	0.392977	0.45621	0.326696	0.350686	FLNB	FLNB_P[+16]2444	2444	FLNB	T4	OUT
sp|O75369|FLNB_HUMAN	EAMQQADDW[+32]LGVPQVITPEEIIHPDVDEHSVMTYLSQFPK	Filamin-B OS=Homo sapiens OX=9606 GN=FLNB PE=1 SV=2	O75369	199	0.00989775	0.0224984	0.0151748	0.034911	0.00667451	0.0446844	0.0115301	0.0347227	0.0385624	FLNB	FLNB_W[+32]208	208	FLNB	T4	OUT
sp|O75369|FLNB_HUMAN	YMGSH[+16]IPESPLQFYVNYPNSGSVSAYGPGLVYGVANK	Filamin-B OS=Homo sapiens OX=9606 GN=FLNB PE=1 SV=2	O75369	1801	0.141127	0.12919	0.122346	0.0816362	0.241803	0.146451	0.0315013	0.11924	0.0829875	FLNB	FLNB_H[+16]1806	1806	FLNB	T4	OUT
sp|O75369|FLNB_HUMAN	Y[+16]MGSHIPESPLQFYVNYPNSGSVSAYGPGLVYGVANK	Filamin-B OS=Homo sapiens OX=9606 GN=FLNB PE=1 SV=2	O75369	1801	0.140616	0.111188	0.119678	0.0816453	0.241012	0.147308	0.0314312	0.119827	0.0812833	FLNB	FLNB_Y[+16]1802	1802	FLNB	T4	OUT
sp|O75369|FLNB_HUMAN	EAMQQADDWLGVPQVITPEEIIHPDVDEHSVM[+16]TYLSQFPK	Filamin-B OS=Homo sapiens OX=9606 GN=FLNB PE=1 SV=2	O75369	199	0.0367003	0.0366632	0.0298177	0.0720683	0.118699	0.0558272	0.0479698	0.0421171	0.0498173	FLNB	FLNB_M[+16]231	231	FLNB	T4	OUT
sp|O75369|FLNB_HUMAN	HTIAVVW[+32]GGVNIPHSPYR	Filamin-B OS=Homo sapiens OX=9606 GN=FLNB PE=1 SV=2	O75369	715	0.0301588	0.0925004	0.107724	0.0479406	0.202951	0.119734	0.138226	0.05697	0.0534062	FLNB	FLNB_W[+32]722	722	FLNB	T4	OUT
sp|O75369|FLNB_HUMAN	IPYLPITNF[+32]NQNWQDGK	Filamin-B OS=Homo sapiens OX=9606 GN=FLNB PE=1 SV=2	O75369	152	0.0683163	0.0572717	0.0585719	0.0715222	0.0468267	0.0667514	0.0432536	0.0806424	0.0473729	FLNB	FLNB_F[+32]161	161	FLNB	T4	OUT
sp|O75915|PRAF3_HUMAN	AW[+16]DDFFPGSDR	PRA1 family protein 3 OS=Homo sapiens OX=9606 GN=ARL6IP5 PE=1 SV=1	O75915	9	0.0221381	0.0203201	0.0193487	0.0208025	0.0204044	0.0233167	0.0037836	0.0173262	0.0233734	PRAF3	PRAF3_W[+16]11	11	ARL6IP5	T4	OUT
sp|O95159|ZFPL1_HUMAN	LVCY[+32]DLFHWACLNER	Zinc finger protein-like 1 OS=Homo sapiens OX=9606 GN=ZFPL1 PE=1 SV=2	O95159	67	0.0487355	0.0461662	0.0459496	0.042927	0.0441603	0.0513623	0.0495739	0.0466393	0.0568381	ZFPL1	ZFPL1_Y[+32]71	71	ZFPL1	T4	OUT
sp|O95292|VAPB_HUMAN	F[+16]MVQSMFAPTDTSDMEAVWK	Vesicle-associated membrane protein-associated protein B/C OS=Homo sapiens OX=9606 GN=VAPB PE=1 SV=3	O95292	87	0.115433	0.1512	0.111739	0.09047	0.162349	0.113029	0.0950972	0.122279	0.139329	VAPB	VAPB_F[+16]88	88	VAPB	T4	OUT
sp|O95292|VAPB_HUMAN	FMVQSMFAPTDTSDM[+16]EAVWK	Vesicle-associated membrane protein-associated protein B/C OS=Homo sapiens OX=9606 GN=VAPB PE=1 SV=3	O95292	87	0.073583	0.0376962	0.0146878	0.053276	0.0696037	0.0454872	0.0493332	0.0452304	0.0663147	VAPB	VAPB_M[+16]102	102	VAPB	T4	OUT
sp|O95292|VAPB_HUMAN	FMVQSM[+16]FAPTDTSDMEAVWK	Vesicle-associated membrane protein-associated protein B/C OS=Homo sapiens OX=9606 GN=VAPB PE=1 SV=3	O95292	87	0.0513461	0.0737062	0.0188918	0.0464967	0.0578311	0.0370339	0.04515	0.0292025	0.053813	VAPB	VAPB_M[+16]93	93	VAPB	T4	OUT
sp|O95292|VAPB_HUMAN	FMVQSMF[+16]APTDTSDMEAVWK	Vesicle-associated membrane protein-associated protein B/C OS=Homo sapiens OX=9606 GN=VAPB PE=1 SV=3	O95292	87	0.0736355	0.0984876	0.0615733	0.076429	0.103696	0.0617125	0.0806866	0.0840565	0.0797549	VAPB	VAPB_F[+16]94	94	VAPB	T4	OUT
sp|O95347|SMC2_HUMAN	DFGSIF[+16]STLLPGANAMLAPPEGQTVLDGLEFK	Structural maintenance of chromosomes protein 2 OS=Homo sapiens OX=9606 GN=SMC2 PE=1 SV=2	O95347	1039	0.113952	0.348912	0.0103841	0.105377	0.142288	0.0863847	0.143121	0.198589	0.0993544	SMC2	SMC2_F[+16]1045	1045	SMC2	T4	OUT
sp|O95471|CLD7_HUMAN	MYDSVLALSAALQATRALM[+32]VVSLVLGFLAMFVATMGMK	Claudin-7 OS=Homo sapiens OX=9606 GN=CLDN7 PE=1 SV=4	O95471	65	0.05614	0.0617266	0.0257641	0.0848477	0.0288818	0.0201928	0.052826	0.0757165	0.0703305	CLD7	CLD7_M[+32]84	84	CLDN7	T4	OUT
sp|O95471|CLD7_HUMAN	MYDSVLALSAALQATRALMVVSLVLGFLAMFVATMGM[+16]K	Claudin-7 OS=Homo sapiens OX=9606 GN=CLDN7 PE=1 SV=4	O95471	65	0.138436	0.132583	0.319902	0.197568	0.182307	0.235896	0.138939	0.159309	0.169398	CLD7	CLD7_M[+16]102	102	CLDN7	T4	OUT
sp|O95471|CLD7_HUMAN	MYDSVLALSAALQATRALMVVSLVLGFLAMFVATMGMK[+16]	Claudin-7 OS=Homo sapiens OX=9606 GN=CLDN7 PE=1 SV=4	O95471	65	0.043774	0	0.00620752	0.0171299	0.0593703	0.074299	0.00604434	0.0464181	0.0471483	CLD7	CLD7_K[+16]103	103	CLDN7	T4	OUT
sp|O95471|CLD7_HUMAN	MYDSVLALSAALQATRALMVVSLVLGFLAM[+16]FVATMGMK	Claudin-7 OS=Homo sapiens OX=9606 GN=CLDN7 PE=1 SV=4	O95471	65	0.0959642	0.0389248	0.255681	0.0246299	0.122909	0.161265	0.0320512	0.113642	0.122988	CLD7	CLD7_M[+16]95	95	CLDN7	T4	OUT
sp|O95471|CLD7_HUMAN	MYDSVLALSAALQATRALMVVSLVLGFLAMFVATM[+16]GMK	Claudin-7 OS=Homo sapiens OX=9606 GN=CLDN7 PE=1 SV=4	O95471	65	0.100751	0.114569	0.0470774	0.118424	0.120859	0.13707	0.0850137	0.0948425	0.0956715	CLD7	CLD7_M[+16]100	100	CLDN7	T4	OUT
sp|O95471|CLD7_HUMAN	M[+16]YDSVLALSAALQATRALMVVSLVLGFLAMFVATMGMK	Claudin-7 OS=Homo sapiens OX=9606 GN=CLDN7 PE=1 SV=4	O95471	65	0.11433	0.166212	0.0686477	0.100634	0.114072	0.0585556	0.143499	0.0942394	0.175035	CLD7	CLD7_M[+16]66	66	CLDN7	T4	OUT
sp|O95471|CLD7_HUMAN	MY[+16]DSVLALSAALQATRALMVVSLVLGFLAMFVATMGMK	Claudin-7 OS=Homo sapiens OX=9606 GN=CLDN7 PE=1 SV=4	O95471	65	0.114371	0.13802	0.0498852	0.100654	0.114054	0.0817185	0.139008	0.0941823	0.174963	CLD7	CLD7_Y[+16]67	67	CLDN7	T4	OUT
sp|P05187|PPB1_HUMAN	NW[+32]YSDADVPASAR	Alkaline phosphatase, placental type OS=Homo sapiens OX=9606 GN=ALPP PE=1 SV=2	P05187	188	0.154869	0.155875	0.119411	0.164513	0.135554	0.156086	0.114477	0.148916	0.164275	PPB1	PPB1_W[+32]190	190	ALPP	T4	OUT
sp|P05187|PPB1_HUMAN	TELMQASLDPSVTHLM[+16]GLFEPGDMK	Alkaline phosphatase, placental type OS=Homo sapiens OX=9606 GN=ALPP PE=1 SV=2	P05187	272	0.0296202	0.039461	0.0363118	0.0452608	0.0344115	0.0296423	0.0445038	0.026373	0.0269155	PPB1	PPB1_M[+16]288	288	ALPP	T4	OUT
sp|P05187|PPB1_HUMAN	TELMQASLDPSVTHLM[+32]GLFEPGDMK	Alkaline phosphatase, placental type OS=Homo sapiens OX=9606 GN=ALPP PE=1 SV=2	P05187	272	0.0133316	0.0121639	0.00957219	0.0163683	0.0179657	0.0132526	0.0153524	0.00717207	0.0116094	PPB1	PPB1_M[+32]288	288	ALPP	T4	OUT
sp|P05187|PPB1_HUMAN	TELM[+16]QASLDPSVTHLMGLFEPGDMK	Alkaline phosphatase, placental type OS=Homo sapiens OX=9606 GN=ALPP PE=1 SV=2	P05187	272	0.0798777	0.120901	0.112218	0.0668018	0.112673	0.0848823	0.134188	0.0827396	0.090664	PPB1	PPB1_M[+16]276	276	ALPP	T4	OUT
sp|P05187|PPB1_HUMAN	TELMQASLDP[+16]SVTHLMGLFEPGDMK	Alkaline phosphatase, placental type OS=Homo sapiens OX=9606 GN=ALPP PE=1 SV=2	P05187	272	0.0279283	0.0383983	0.0358723	0.0456128	0.0361495	0.0282123	0.0180662	0.0246435	0.0266803	PPB1	PPB1_P[+16]282	282	ALPP	T4	OUT
sp|P05187|PPB1_HUMAN	TELMQASLDPSVTHLMGLFEPGDM[+16]K	Alkaline phosphatase, placental type OS=Homo sapiens OX=9606 GN=ALPP PE=1 SV=2	P05187	272	0.144411	0.114287	0.14601	0.188163	0.172189	0.136249	0.202163	0.0586109	0.151087	PPB1	PPB1_M[+16]296	296	ALPP	T4	OUT
sp|P05556|ITB1_HUMAN	LGGIVLPNDGQCHLENNMYTM[+16]SHYYDYPSIAHLVQK	Integrin beta-1 OS=Homo sapiens OX=9606 GN=ITGB1 PE=1 SV=2	P05556	289	0.180588	0.150322	0.154017	0.15187	0.213584	0.180907	0.165434	0.00340501	0.168483	ITB1	ITB1_M[+16]310	310	ITGB1	T4	OUT
sp|P05556|ITB1_HUMAN	LGGIVLPNDGQCHLENNMYTMSH[+16]YYDYPSIAHLVQK	Integrin beta-1 OS=Homo sapiens OX=9606 GN=ITGB1 PE=1 SV=2	P05556	289	0.180543	0.150471	0.153716	0.155937	0.213682	0.18099	0.165611	0.181769	0.168702	ITB1	ITB1_H[+16]312	312	ITGB1	T4	OUT
sp|P05556|ITB1_HUMAN	LGGIVLP[+16]NDGQCHLENNMYTMSHYYDYPSIAHLVQK	Integrin beta-1 OS=Homo sapiens OX=9606 GN=ITGB1 PE=1 SV=2	P05556	289	0.180705	0.150284	0.15372	0.156009	0.213986	0.18099	0.165332	0.181742	0.168459	ITB1	ITB1_P[+16]296	296	ITGB1	T4	OUT
sp|P09758|TACD2_HUMAN	M[+16]TVCSPDGPGGR	Tumor-associated calcium signal transducer 2 OS=Homo sapiens OX=9606 GN=TACSTD2 PE=1 SV=3	P09758	40	0.0178983	0.0398074	0.0326866	0.0488319	0.765666	0.0317222	0.0585785	0.0127076	0.0238633	TACD2	TACD2_M[+16]41	41	TACSTD2	T4	L1
sp|P0C6T2|OST4_HUMAN	M[+16]ITDVQLAIFANMLGVSLFLLVVLYHYVAVNNPK	Dolichyl-diphosphooligosaccharide--protein glycosyltransferase subunit 4 OS=Homo sapiens OX=9606 GN=OST4 PE=1 SV=1	P0C6T2	0	0.431075	0.109986	0.447211	0.462302	0.276825	0.262415	0.335964	0.236791	0.523966	OST4	OST4_M[+16]1	1	OST4	T4	OUT
sp|P10620|MGST1_HUMAN	M[+16]VDLTQVMDDEVFMAFASYATIILSK	Microsomal glutathione S-transferase 1 OS=Homo sapiens OX=9606 GN=MGST1 PE=1 SV=1	P10620	0	0.279011	0.277965	0.206563	0.298282	0.241278	0.116258	0.0799443	0.0834573	0.569441	MGST1	MGST1_M[+16]1	1	MGST1	T4	OUT
sp|P11233|RALA_HUMAN	AEQW[+32]NVNYVETSAK	Ras-related protein Ral-A OS=Homo sapiens OX=9606 GN=RALA PE=1 SV=1	P11233	145	0.0855639	0.0838893	0.104523	0.114013	0.0852716	0.0869473	0.091134	0.0999079	0.112226	RALA	RALA_W[+32]149	149	RALA	T4	OUT
sp|P12956|XRCC6_HUMAN	IM[+16]LFTNEDNPHGNDSAK	X-ray repair cross-complementing protein 6 OS=Homo sapiens OX=9606 GN=XRCC6 PE=1 SV=2	P12956	165	0.347721	0.237091	0.127561	0.377612	0.0658994	0.363426	0.00425156	0.372122	0.44743	XRCC6	XRCC6_M[+16]167	167	XRCC6	T4	OUT
sp|P14618|KPYM_HUMAN	AGKPVICATQMLESM[+16]IK	Pyruvate kinase PKM OS=Homo sapiens OX=9606 GN=PKM PE=1 SV=4	P14618	319	0.0791432	0.107124	0.0483316	0.0895921	0.156892	0.0991472	0.102183	0.0894792	0.199633	KPYM	KPYM_M[+16]334	334	PKM	T4	OUT
sp|P14618|KPYM_HUMAN	CDENILW[+32]LDYK	Pyruvate kinase PKM OS=Homo sapiens OX=9606 GN=PKM PE=1 SV=4	P14618	151	0.0553124	0.0543077	0.042932	0.0724383	0.0324103	0.0450155	0.0229973	0.00245635	0.00166405	KPYM	KPYM_W[+32]158	158	PKM	T4	OUT
sp|P14618|KPYM_HUMAN	AGKPVICATQM[+16]LESMIK	Pyruvate kinase PKM OS=Homo sapiens OX=9606 GN=PKM PE=1 SV=4	P14618	319	0.0234091	0.0448206	0.0210607	0.0381045	0.0443631	0.0303855	0.0382517	0.0304234	0.063652	KPYM	KPYM_M[+16]330	330	PKM	T4	OUT
sp|P15144|AMPN_HUMAN	VNY[+32]DEENWR	Aminopeptidase N OS=Homo sapiens OX=9606 GN=ANPEP PE=1 SV=4	P15144	631	0.272426	0.210755	0.260671	0.17079	0.190752	0.196018	0	0.164622	0.208753	AMPN	AMPN_Y[+32]634	634	ANPEP	T4	OUT
sp|P15144|AMPN_HUMAN	QW[+32]MENPNNNPIHPNLR	Aminopeptidase N OS=Homo sapiens OX=9606 GN=ANPEP PE=1 SV=4	P15144	777	0.0898861	0.0452072	0.0231316	0.0220479	0.0219033	0.0352891	0.0224294	0.0268421	0.0261239	AMPN	AMPN_W[+32]779	779	ANPEP	T4	OUT
sp|P15144|AMPN_HUMAN	QYMPW[+32]EAALSSLSYFK	Aminopeptidase N OS=Homo sapiens OX=9606 GN=ANPEP PE=1 SV=4	P15144	690	0.00320907	0.00427464	0.00315409	0.00418647	0.000252259	0.00145341	0.00614172	0.00417973	0.00582382	AMPN	AMPN_W[+32]695	695	ANPEP	T4	OUT
sp|P15144|AMPN_HUMAN	QYM[+16]PWEAALSSLSYFK	Aminopeptidase N OS=Homo sapiens OX=9606 GN=ANPEP PE=1 SV=4	P15144	690	0.065637	0.0600291	0.0633238	0.089645	0.173333	0.129234	0.0947605	0.0838063	0.108457	AMPN	AMPN_M[+16]693	693	ANPEP	T4	OUT
sp|P15144|AMPN_HUMAN	QWM[+16]ENPNNNPIHPNLR	Aminopeptidase N OS=Homo sapiens OX=9606 GN=ANPEP PE=1 SV=4	P15144	777	0.10752	0.115163	0.0754064	0.109428	0.200393	0.120993	0.126849	0.0859231	0.124637	AMPN	AMPN_M[+16]780	780	ANPEP	T4	OUT
sp|P17301|ITA2_HUMAN	VMVVVTDGESHDGSM[+16]LK	Integrin alpha-2 OS=Homo sapiens OX=9606 GN=ITGA2 PE=1 SV=1	P17301	276	0.16249	0.166493	0.175288	0.22321	0.334172	0.21471	0.208134	0.160194	0.187738	ITA2	ITA2_M[+16]291	291	ITGA2	T4	L2
sp|P17693|HLAG_HUMAN	W[+16]AAVVVPSGEEQR	HLA class I histocompatibility antigen, alpha chain G OS=Homo sapiens OX=9606 GN=HLA-G PE=1 SV=1	P17693	267	0.744699	0.787299	0.257151	0.0199091	0.377915	0.138873	0.781298	0.0283346	0.520655	HLAG	HLAG_W[+16]268	268	HLA-G	T4	OUT
sp|P18031|PTN1_HUMAN	SYILTQGPLPNTCGHFWEM[+16]VWEQK	Tyrosine-protein phosphatase non-receptor type 1 OS=Homo sapiens OX=9606 GN=PTPN1 PE=1 SV=1	P18031	79	0.075402	0.185341	3.02021e-05	0.169623	0.135615	0.0773588	0.103717	0.119835	0.134623	PTN1	PTN1_M[+16]98	98	PTPN1	T4	OUT
sp|P18031|PTN1_HUMAN	SY[+32]ILTQGPLPNTCGHFWEMVWEQK	Tyrosine-protein phosphatase non-receptor type 1 OS=Homo sapiens OX=9606 GN=PTPN1 PE=1 SV=1	P18031	79	0.0637517	0.261956	0.102406	0.105754	0.0465457	0.0683246	0.060456	0.0800096	0.187502	PTN1	PTN1_Y[+32]81	81	PTPN1	T4	OUT
sp|P18583|SON_HUMAN	ETLPDSGF[+16]SANIEDINEADLVRPLLPK	Protein SON OS=Homo sapiens OX=9606 GN=SON PE=1 SV=4	P18583	1713	0.0230834	0.0590345	0.16069	0.2194	0.284439	0.203076	0.212006	0.330254	0.343681	SON	SON_F[+16]1721	1721	SON	T4	L1
sp|P27449|VATL_HUMAN	GTAQQPRLFVGM[+16]ILILIFAEVLGLYGLIVALILSTK	V-type proton ATPase 16 kDa proteolipid subunit OS=Homo sapiens OX=9606 GN=ATP6V0C PE=1 SV=1	P27449	119	0.11234	0.000294191	0.0151181	0.0743264	0.166026	0.109213	0.0187493	0.0537987	0.0446042	VATL	VATL_M[+16]131	131	ATP6V0C	T4	L1
sp|P29317|EPHA2_HUMAN	EVVLLDF[+16]AAAGGELGWLTHPYGK	Ephrin type-A receptor 2 OS=Homo sapiens OX=9606 GN=EPHA2 PE=1 SV=2	P29317	27	0.241092	0.385201	0.0437584	0.17332	0.31909	0.322922	0.330352	0.451725	0.222001	EPHA2	EPHA2_F[+16]34	34	EPHA2	T4	OUT
sp|P29401|TKT_HUMAN	NM[+16]AEQIIQEIYSQIQSK	Transketolase OS=Homo sapiens OX=9606 GN=TKT PE=1 SV=3	P29401	264	0.0720995	0.063441	0.0199905	0.058491	0.0962889	0.0484601	0.010368	0.0639045	0.0469409	TKT	TKT_M[+16]266	266	TKT	T4	L2
sp|P42167|LAP2B_HUMAN	RVEHNQSY[+32]SQAGITETEWTSGSSK	Lamina-associated polypeptide 2, isoforms beta/gamma OS=Homo sapiens OX=9606 GN=TMPO PE=1 SV=2	P42167	215	0.132037	0.0591545	0.0510928	0.0787981	0.0758671	0.119602	0.075666	0.0686229	0.0737714	LAP2B	LAP2B_Y[+32]223	223	TMPO	T4	OUT
sp|P42167|LAP2B_HUMAN	RVEHNQSYSQAGITETEW[+32]TSGSSK	Lamina-associated polypeptide 2, isoforms beta/gamma OS=Homo sapiens OX=9606 GN=TMPO PE=1 SV=2	P42167	215	0.132607	0.0737644	0.0457574	0.0236491	0.078377	0	0.0815352	0.0604001	0.0725805	LAP2B	LAP2B_W[+32]233	233	TMPO	T4	OUT
sp|P43243|MATR3_HUMAN	LASLMNLGM[+16]SSSLNQQGAHSALSSASTSSHNLQSIFNIGSR	Matrin-3 OS=Homo sapiens OX=9606 GN=MATR3 PE=1 SV=2	P43243	51	0.11779	0.0533947	0.0960345	0.165678	0.124153	0.166668	0.156011	0.100342	0.140488	MATR3	MATR3_M[+16]60	60	MATR3	T4	OUT
sp|P43243|MATR3_HUMAN	LASLM[+16]NLGMSSSLNQQGAHSALSSASTSSHNLQSIFNIGSR	Matrin-3 OS=Homo sapiens OX=9606 GN=MATR3 PE=1 SV=2	P43243	51	0.112981	0.0441638	0.0734375	0.110152	0.0910954	0.105009	0.136608	0.0846876	0.102332	MATR3	MATR3_M[+16]56	56	MATR3	T4	OUT
sp|P48509|CD151_HUMAN	DHASNIY[+32]K	CD151 antigen OS=Homo sapiens OX=9606 GN=CD151 PE=1 SV=3	P48509	195	0.0819691	0.0221867	0.0180965	0.102827	0.626544	0.258031	0.0757198	0.108573	0.041882	CD151	CD151_Y[+32]202	202	CD151	T4	L1
sp|P50402|EMD_HUMAN	QSVTSF[+16]PDADAFHHQVHDDDLLSSSEEECKDR	Emerin OS=Homo sapiens OX=9606 GN=EMD PE=1 SV=1	P50402	118	0.0829739	0.0712089	0.0871874	0.0722841	0.0809595	0.0800008	0.00504685	0.0779966	0.0768391	EMD	EMD_F[+16]124	124	EMD	T4	OUT
sp|P50454|SERPH_HUMAN	KPAAAAAP[+16]GTAEK	Serpin H1 OS=Homo sapiens OX=9606 GN=SERPINH1 PE=1 SV=2	P50454	22	0.139727	0.120928	0.192437	0.146613	0.65554	0.00284441	0.0531367	0.243024	0.153523	SERPH	SERPH_P[+16]30	30	SERPINH1	T4	L1
sp|P53985|MOT1_HUMAN	SVFQTINQFLDLTLFTHRGFLLYLSGNVIMFF[+16]GLFAPLVFLSSYGK	Monocarboxylate transporter 1 OS=Homo sapiens OX=9606 GN=SLC16A1 PE=1 SV=3	P53985	243	0.132289	0.0124237	0.581622	0.206943	0.160687	0.113014	0.00214728	0.104011	0.0433618	MOT1	MOT1_F[+16]275	275	SLC16A1	T4	L1
sp|P60468|SC61B_HUMAN	TTSAGTGGMW[+32]R	Protein transport protein Sec61 subunit beta OS=Homo sapiens OX=9606 GN=SEC61B PE=1 SV=2	P60468	46	0.0945661	0.0986166	0.181165	0.222228	0.0851054	0.0899862	0.0589446	0.0755943	0.0859752	SC61B	SC61B_W[+32]56	56	SEC61B	T4	OUT
sp|P60468|SC61B_HUMAN	TTSAGTGGM[+32]WR	Protein transport protein Sec61 subunit beta OS=Homo sapiens OX=9606 GN=SEC61B PE=1 SV=2	P60468	46	0.0942535	0.101311	0.00728587	0.0144244	0.0116139	0.0875619	0.0172369	0.0764388	0.0280196	SC61B	SC61B_M[+32]55	55	SEC61B	T4	OUT
sp|P60468|SC61B_HUMAN	TTSAGTGGMW[+16]R	Protein transport protein Sec61 subunit beta OS=Homo sapiens OX=9606 GN=SEC61B PE=1 SV=2	P60468	46	0.0745482	0.0768008	0.358404	0.0456358	0.0620649	0.0716085	0.104046	0.0555747	0.0754392	SC61B	SC61B_W[+16]56	56	SEC61B	T4	OUT
sp|P60468|SC61B_HUMAN	TTSAGTGGM[+16]WR	Protein transport protein Sec61 subunit beta OS=Homo sapiens OX=9606 GN=SEC61B PE=1 SV=2	P60468	46	0.0388339	0.0598798	0.0217194	0.067434	0.154724	0.081708	0.0713744	0.0550933	0.0638077	SC61B	SC61B_M[+16]55	55	SEC61B	T4	OUT
sp|P60903|S10AA_HUMAN	EFPGF[+16]LENQKDPLAVDK	Protein S100-A10 OS=Homo sapiens OX=9606 GN=S100A10 PE=1 SV=2	P60903	37	0.0874079	0.129716	0.26214	0.11902	0.1263	0.131909	0.174506	0.170907	0.219449	S10AA	S10AA_F[+16]42	42	S100A10	T4	OUT
sp|Q04637|IF4G1_HUMAN	F[+16]MLQDVLDLR	Eukaryotic translation initiation factor 4 gamma 1 OS=Homo sapiens OX=9606 GN=EIF4G1 PE=1 SV=4	Q04637	976	0.124655	0.242989	0.127151	0.0843369	0.113466	0.587264	0.0929661	0.129428	0.128763	IF4G1	IF4G1_F[+16]977	977	EIF4G1	T4	OUT
sp|Q11201|SIA4A_HUMAN	ESSY[+16]GPEIDSHDFVLR	CMP-N-acetylneuraminate-beta-galactosamide-alpha-2,3-sialyltransferase 1 OS=Homo sapiens OX=9606 GN=ST3GAL1 PE=2 SV=1	Q11201	152	0.458153	0.0943933	0.0950951	0.00794139	0.113519	0.376944	0.113902	0.374862	0.400444	SIA4A	SIA4A_Y[+16]156	156	ST3GAL1	T4	OUT
sp|Q13045|FLII_HUMAN	QLP[+16]AMTALQTLHLR	Protein flightless-1 homolog OS=Homo sapiens OX=9606 GN=FLII PE=1 SV=2	Q13045	192	0.513472	0.219362	0.074506	0.486171	0.489466	0.48426	0.464765	0.411486	0.564256	FLII	FLII_P[+16]195	195	FLII	T4	OUT
sp|Q13740|CD166_HUMAN	FVCM[+16]LVTEDNVFEAPTIVK	CD166 antigen OS=Homo sapiens OX=9606 GN=ALCAM PE=1 SV=2	Q13740	110	0.212345	0.255158	0.196027	0.152727	0.244177	0.160135	0.130902	0.218498	0.190696	CD166	CD166_M[+16]114	114	ALCAM	T4	OUT
sp|Q13740|CD166_HUMAN	ADIQM[+16]PFTCSVTYYGPSGQK	CD166 antigen OS=Homo sapiens OX=9606 GN=ALCAM PE=1 SV=2	Q13740	211	0.108901	0.105252	0.0815265	0.25798	0.246782	0.0915129	0.134488	0.108242	0.129722	CD166	CD166_M[+16]216	216	ALCAM	T4	OUT
sp|Q14435|GALT3_HUMAN	QNIDAGERPCLQGYY[+16]TAAELKPVLDRPPQDSNAPGASGK	Polypeptide N-acetylgalactosaminyltransferase 3 OS=Homo sapiens OX=9606 GN=GALNT3 PE=1 SV=2	Q14435	87	0.0533527	0.0592865	0.04116	0.0500251	0.053063	0.060592	0.052602	0.0466695	0.0483282	GALT3	GALT3_Y[+16]102	102	GALNT3	T4	OUT
sp|Q15041|AR6P1_HUMAN	W[+32]TTEQQQR	ADP-ribosylation factor-like protein 6-interacting protein 1 OS=Homo sapiens OX=9606 GN=ARL6IP1 PE=1 SV=2	Q15041	96	0.0418088	0.00361633	0.0668968	0.0397119	0.00211157	0.0391879	0.0150742	0.0110009	0.139366	AR6P1	AR6P1_W[+32]97	97	ARL6IP1	T4	OUT
sp|Q15149|PLEC_HUMAN	DLLPSDM[+16]AVALLEAQAGTGHIIDPATSAR	Plectin OS=Homo sapiens OX=9606 GN=PLEC PE=1 SV=3	Q15149	3183	0.0315368	0.0344223	0.0457415	0.049125	0.0843239	0.0495901	0.0645412	0.0836596	0.0928799	PLEC	PLEC_M[+16]3190	3190	PLEC	T4	OUT
sp|Q15149|PLEC_HUMAN	DLLP[+16]SDMAVALLEAQAGTGHIIDPATSAR	Plectin OS=Homo sapiens OX=9606 GN=PLEC PE=1 SV=3	Q15149	3183	0.031481	0.0338513	0.0467233	0.0491268	0.0843262	0.0532542	0.0645368	0.0836596	0.0942238	PLEC	PLEC_P[+16]3187	3187	PLEC	T4	OUT
sp|Q16850|CP51A_HUMAN	LYEFDLIDGYFPTVNYTTM[+16]IHTPENPVIR	Lanosterol 14-alpha demethylase OS=Homo sapiens OX=9606 GN=CYP51A1 PE=1 SV=3	Q16850	468	0.0252629	0.10215	0.0458294	0.038066	0.0772275	0.028253	0.0414754	0.00351739	0.072639	CP51A	CP51A_M[+16]487	487	CYP51A1	T4	L2
sp|Q3ZCM7|TBB8_HUMAN	EAESCDCLQGFQLTHSLGGGTGSGM[+16]GTLLLSK	Tubulin beta-8 chain OS=Homo sapiens OX=9606 GN=TUBB8 PE=1 SV=2	Q3ZCM7	122	0.177931	0.131802	0.0788834	0.0988994	0.293731	0.153626	0.160438	0.0950301	0.179825	TBB8	TBB8_M[+16]147	147	TUBB8	T4	L2
sp|Q5SSJ5|HP1B3_HUMAN	KTP[+16]AKSPGK	Heterochromatin protein 1-binding protein 3 OS=Homo sapiens OX=9606 GN=HP1BP3 PE=1 SV=1	Q5SSJ5	459	0.00852302	0.0122249	5.84288e-06	0.000459787	0.0120847	0.00412283	0.00411497	0.00180926	0.00467487	HP1B3	HP1B3_P[+16]462	462	HP1BP3	T4
sp|Q5SSJ5|HP1B3_HUMAN	KTPAK[+16]SPGK	Heterochromatin protein 1-binding protein 3 OS=Homo sapiens OX=9606 GN=HP1BP3 PE=1 SV=1	Q5SSJ5	459	0.991477	0.987775	0.999994	0.99954	0.987915	0.995877	0.995885	0.998191	0.995325	HP1B3	HP1B3_K[+16]464	464	HP1BP3	T4
sp|Q6PIU2|NCEH1_HUMAN	NY[+32]KPVVQTTGNAR	Neutral cholesterol ester hydrolase 1 OS=Homo sapiens OX=9606 GN=NCEH1 PE=1 SV=3	Q6PIU2	298	0.00871056	0.00970244	0.000537628	0.00272087	0.00968512	0.0068664	0.0191042	0.00733987	0.00658206	NCEH1	NCEH1_Y[+32]300	300	NCEH1	T4	L2
sp|Q6PIU2|NCEH1_HUMAN	TYILTCEHDVLRDDGIM[+16]YAK	Neutral cholesterol ester hydrolase 1 OS=Homo sapiens OX=9606 GN=NCEH1 PE=1 SV=3	Q6PIU2	339	0.114536	0.135144	0.168544	0.119279	0.197562	0.174901	0.161256	0.121666	0.150005	NCEH1	NCEH1_M[+16]356	356	NCEH1	T4	L2
sp|Q6PIU2|NCEH1_HUMAN	TYILTCEHDVLR[+16]DDGIMYAK	Neutral cholesterol ester hydrolase 1 OS=Homo sapiens OX=9606 GN=NCEH1 PE=1 SV=3	Q6PIU2	339	0.109147	0.126414	0.155995	0.107743	0.173148	0.16217	0.00423699	0.109161	0.11412	NCEH1	NCEH1_R[+16]351	351	NCEH1	T4	L2
sp|Q86UE4|LYRIC_HUMAN	EM[+16]LSVGLGFLR	Protein LYRIC OS=Homo sapiens OX=9606 GN=MTDH PE=1 SV=2	Q86UE4	22	0.532656	0.852872	0.621151	0.463824	0.580918	0.813668	0.999813	0.38134	0.668853	LYRIC	LYRIC_M[+16]24	24	MTDH	T4
sp|Q86UE4|LYRIC_HUMAN	EM[+32]LSVGLGFLR	Protein LYRIC OS=Homo sapiens OX=9606 GN=MTDH PE=1 SV=2	Q86UE4	22	0.467344	0.147128	0.378849	0.536176	0.419082	0.186332	0.000187189	0.61866	0.331147	LYRIC	LYRIC_M[+32]24	24	MTDH	T4
sp|Q8N2K0|ABD12_HUMAN	GM[+16]TYDALHVFDWIK	Lysophosphatidylserine lipase ABHD12 OS=Homo sapiens OX=9606 GN=ABHD12 PE=1 SV=2	Q8N2K0	218	0.166575	0.140986	0.134141	0.240314	0.220844	0.157491	0.16707	0.185214	0.202021	ABD12	ABD12_M[+16]220	220	ABHD12	T4	OUT
sp|Q8NFJ5|RAI3_HUMAN	AHAW[+32]PSPYK	Retinoic acid-induced protein 3 OS=Homo sapiens OX=9606 GN=GPRC5A PE=1 SV=2	Q8NFJ5	339	0.0458474	0.126989	0.122052	0.180801	0.115226	0.181027	0.0716136	0.0797546	0.302281	RAI3	RAI3_W[+32]343	343	GPRC5A	T4	OUT
sp|Q8TC12|RDH11_HUMAN	M[+16]VELMFPLLLLLLPFLLYMAAPQIR	Retinol dehydrogenase 11 OS=Homo sapiens OX=9606 GN=RDH11 PE=1 SV=2	Q8TC12	0	0.335557	0.0781005	0.0895024	0.349005	0.28873	0.353769	0.148304	0.32047	0.272644	RDH11	RDH11_M[+16]1	1	RDH11	T4	OUT
sp|Q8TC12|RDH11_HUMAN	M[+32]VELMFPLLLLLLPFLLYMAAPQIR	Retinol dehydrogenase 11 OS=Homo sapiens OX=9606 GN=RDH11 PE=1 SV=2	Q8TC12	0	0.0837308	0.335646	0.379175	0.0557388	0.17494	0.134562	0.413566	0.0999729	0.440527	RDH11	RDH11_M[+32]1	1	RDH11	T4	OUT
sp|Q8TC12|RDH11_HUMAN	MVELM[+32]FPLLLLLLPFLLYMAAPQIR	Retinol dehydrogenase 11 OS=Homo sapiens OX=9606 GN=RDH11 PE=1 SV=2	Q8TC12	0	0.0909535	0.0108443	0.381297	0.0665515	0.175021	0.134013	0.0438833	0.0925015	0.00454347	RDH11	RDH11_M[+32]5	5	RDH11	T4	OUT
sp|Q8TC12|RDH11_HUMAN	MVELMFPLLLLLLPFLLY[+16]MAAPQIR	Retinol dehydrogenase 11 OS=Homo sapiens OX=9606 GN=RDH11 PE=1 SV=2	Q8TC12	0	0.0109535	0.528192	0.0221473	0.0271021	0.025097	0.0208432	0.00372405	0.0116777	0.0253513	RDH11	RDH11_Y[+16]18	18	RDH11	T4	OUT
sp|Q8TCJ2|STT3B_HUMAN	STHHLASHGFYEF[+32]LNWFDER	Dolichyl-diphosphooligosaccharide--protein glycosyltransferase subunit STT3B OS=Homo sapiens OX=9606 GN=STT3B PE=1 SV=1	Q8TCJ2	109	0.0279638	0.0740702	0.0464519	0.0720185	0.0264837	0.0247285	0.0267899	0	0.000261699	STT3B	STT3B_F[+32]122	122	STT3B	T4	OUT
sp|Q8TCJ2|STT3B_HUMAN	STHHLASHGFY[+32]EFLNWFDER	Dolichyl-diphosphooligosaccharide--protein glycosyltransferase subunit STT3B OS=Homo sapiens OX=9606 GN=STT3B PE=1 SV=1	Q8TCJ2	109	0.0260952	0.0106733	5.8533e-05	0.0195886	0.0250077	0.0260206	0.055127	0.0111962	0.0179399	STT3B	STT3B_Y[+32]120	120	STT3B	T4	OUT
sp|Q92621|NU205_HUMAN	VHNLITDFLALMPM[+16]K	Nuclear pore complex protein Nup205 OS=Homo sapiens OX=9606 GN=NUP205 PE=1 SV=3	Q92621	391	0.192335	0.138003	0.191565	0.111654	0.174319	0.192318	0.165843	0.224502	0.115679	NU205	NU205_M[+16]405	405	NUP205	T4	OUT
sp|Q92621|NU205_HUMAN	VHNLITDFLALMP[+16]MK	Nuclear pore complex protein Nup205 OS=Homo sapiens OX=9606 GN=NUP205 PE=1 SV=3	Q92621	391	0.295963	0.223105	0.18053	0.233613	0.133755	0.200247	0.214339	0.149852	0.286519	NU205	NU205_P[+16]404	404	NUP205	T4	OUT
sp|Q96AG4|LRC59_HUMAN	RHEILQW[+32]VLQTDSQQ	Leucine-rich repeat-containing protein 59 OS=Homo sapiens OX=9606 GN=LRRC59 PE=1 SV=1	Q96AG4	292	0.050136	0.0151319	0.0488105	0.0376502	0.0473618	0.0567425	0.0498186	0.0304749	0.0381664	LRC59	LRC59_W[+32]299	299	LRRC59	T4	OUT
sp|Q99640|PMYT1_HUMAN	Y[+16]MAPELLQGSYGTAADVFSLGLTILEVACNMELPHGGEGWQQLR	Membrane-associated tyrosine- and threonine-specific cdc2-inhibitory kinase OS=Homo sapiens OX=9606 GN=PKMYT1 PE=1 SV=1	Q99640	272	0.115753	0.321997	0.366785	0.124429	0.119789	0.0509496	0.216924	0.159149	0.391677	PMYT1	PMYT1_Y[+16]273	273	PKMYT1	T4	OUT
sp|Q99805|TM9S2_HUMAN	HTHIDKPDCSGPP[+16]MDISNK	Transmembrane 9 superfamily member 2 OS=Homo sapiens OX=9606 GN=TM9SF2 PE=1 SV=1	Q99805	241	0.050789	0.0482578	0.0069299	0.055397	0.150555	0.0669541	0.0706218	0.050916	0.0515841	TM9S2	TM9S2_P[+16]254	254	TM9SF2	T4	L1
sp|Q99805|TM9S2_HUMAN	HTHIDKPDCSGPPM[+16]DISNK	Transmembrane 9 superfamily member 2 OS=Homo sapiens OX=9606 GN=TM9SF2 PE=1 SV=1	Q99805	241	0.155779	0.110561	0.0469635	0.134171	0.260913	0.163104	0.116124	0.116715	0.110713	TM9S2	TM9S2_M[+16]255	255	TM9SF2	T4	L1
sp|Q9BQG0|MBB1A_HUMAN	AMLR[+16]PALFANLFGVLALFQSGR	Myb-binding protein 1A OS=Homo sapiens OX=9606 GN=MYBBP1A PE=1 SV=2	Q9BQG0	126	0.092314	0.396836	0.0966562	0.0432157	0.384792	0.0681925	0.136773	0.0447838	0.748255	MBB1A	MBB1A_R[+16]130	130	MYBBP1A	T4	L1
sp|Q9BQG0|MBB1A_HUMAN	AM[+16]LRPALFANLFGVLALFQSGR	Myb-binding protein 1A OS=Homo sapiens OX=9606 GN=MYBBP1A PE=1 SV=2	Q9BQG0	126	0.32179	0.397147	0.451219	0.463415	0.212799	0.37479	0.0475563	0.311577	0.137232	MBB1A	MBB1A_M[+16]128	128	MYBBP1A	T4	L1
sp|Q9BUN8|DERL1_HUMAN	HNW[+32]GQGFR	Derlin-1 OS=Homo sapiens OX=9606 GN=DERL1 PE=1 SV=1	Q9BUN8	239	0.436482	0.353485	0.181002	0.177372	0.327764	0.3068	0.0981767	0.282031	0.314056	DERL1	DERL1_W[+32]242	242	DERL1	T4	OUT
sp|Q9BW60|ELOV1_HUMAN	IQGYPLM[+32]GSPLLMTSILLTYVYFVLSLGPR	Elongation of very long chain fatty acids protein 1 OS=Homo sapiens OX=9606 GN=ELOVL1 PE=1 SV=1	Q9BW60	18	0.0179077	0.00288613	0.0148522	0.00190034	0.0396426	0.0259891	0.00414549	0.00336348	0.00384231	ELOV1	ELOV1_M[+32]25	25	ELOVL1	T4	OUT
sp|Q9BW60|ELOV1_HUMAN	IQGYPLM[+16]GSPLLMTSILLTYVYFVLSLGPR	Elongation of very long chain fatty acids protein 1 OS=Homo sapiens OX=9606 GN=ELOVL1 PE=1 SV=1	Q9BW60	18	0.186392	0.389163	0.016284	0.205007	0.247498	0.360039	0.026624	0.230683	0.280239	ELOV1	ELOV1_M[+16]25	25	ELOVL1	T4	OUT
sp|Q9BW60|ELOV1_HUMAN	IQGYPLMGSPLLM[+32]TSILLTYVYFVLSLGPR	Elongation of very long chain fatty acids protein 1 OS=Homo sapiens OX=9606 GN=ELOVL1 PE=1 SV=1	Q9BW60	18	0.0200687	0.00163442	0.0342487	0.0156275	0.0396701	0.0261734	0.0325923	0.0127509	0.00416613	ELOV1	ELOV1_M[+32]31	31	ELOVL1	T4	OUT
sp|Q9BYG3|MK67I_HUMAN	LLECHF[+16]MPPEK	MKI67 FHA domain-interacting nucleolar phosphoprotein OS=Homo sapiens OX=9606 GN=NIFK PE=1 SV=1	Q9BYG3	114	0.401325	0.19355	0.0947784	0.142185	0.479921	0.0326899	0.765166	0.198241	0.321032	MK67I	MK67I_F[+16]120	120	NIFK	T4	OUT
sp|Q9GZP9|DERL2_HUMAN	AIF[+32]DTPDEDPNYNPLPEERPGGFAWGEGQR	Derlin-2 OS=Homo sapiens OX=9606 GN=DERL2 PE=1 SV=1	Q9GZP9	206	0.0657349	0.0458063	0.042439	0.0362882	0.0697998	0.0583569	0.0617009	0.0491607	0.0610435	DERL2	DERL2_F[+32]209	209	DERL2	T4	OUT
sp|Q9GZP9|DERL2_HUMAN	AIFDTPDEDPNY[+32]NPLPEERPGGFAWGEGQR	Derlin-2 OS=Homo sapiens OX=9606 GN=DERL2 PE=1 SV=1	Q9GZP9	206	0.0676987	0.135878	0.0424946	0.0390633	0.0683256	0.0583634	0.0615195	0.0489589	0.051781	DERL2	DERL2_Y[+32]218	218	DERL2	T4	OUT
sp|Q9H1C4|UN93B_HUMAN	SGNLIVVESVLMAVAFLAMLLVLGLCGAAYR[+16]PTEEIDLR	Protein unc-93 homolog B1 OS=Homo sapiens OX=9606 GN=UNC93B1 PE=1 SV=2	Q9H1C4	281	0.0746269	0.157116	0.00222019	0.0562053	0.0287501	0.0893291	0.0347571	0.000777683	0.00836032	UN93B	UN93B_R[+16]312	312	UNC93B1	T4	L2
sp|Q9H1C4|UN93B_HUMAN	SGNLIVVESVLMAVAF[+32]LAMLLVLGLCGAAYRPTEEIDLR	Protein unc-93 homolog B1 OS=Homo sapiens OX=9606 GN=UNC93B1 PE=1 SV=2	Q9H1C4	281	0.0475054	0.0446172	0.02159	0.0705502	0.117198	0.099205	0.0212474	0.0204054	0.111937	UN93B	UN93B_F[+32]297	297	UNC93B1	T4	L2
sp|Q9H1C4|UN93B_HUMAN	SGNLIVVESVLM[+16]AVAFLAMLLVLGLCGAAYRPTEEIDLR	Protein unc-93 homolog B1 OS=Homo sapiens OX=9606 GN=UNC93B1 PE=1 SV=2	Q9H1C4	281	0.254742	0.0596206	0.0319757	0.0489468	0.277698	0.289168	0.305631	0.239491	0.100208	UN93B	UN93B_M[+16]293	293	UNC93B1	T4	L2
sp|Q9H583|HEAT1_HUMAN	LLETVLGYISAVAQSM[+16]ER	HEAT repeat-containing protein 1 OS=Homo sapiens OX=9606 GN=HEATR1 PE=1 SV=3	Q9H583	1549	0.112217	0.0555176	0.0566747	0.0688057	0.0991767	0.108446	0.103012	0.116505	0.199626	HEAT1	HEAT1_M[+16]1565	1565	HEATR1	T4	OUT
sp|Q9H9B4|SFXN1_HUMAN	W[+32]DQSTFIGR	Sideroflexin-1 OS=Homo sapiens OX=9606 GN=SFXN1 PE=1 SV=4	Q9H9B4	15	0.406929	0.105431	0.080953	0.0183815	0.385761	0.366417	0.112255	0.05097	0.0269307	SFXN1	SFXN1_W[+32]16	16	SFXN1	T4	L1
sp|Q9NZM1|MYOF_HUMAN	APNLYM[+16]VPQGIRPVVQLTAIEILAWGLR	Myoferlin OS=Homo sapiens OX=9606 GN=MYOF PE=1 SV=1	Q9NZM1	1286	0.232671	0.190892	0.121204	0.150496	0.195564	0.137272	0.124752	0.164555	0.092348	MYOF	MYOF_M[+16]1292	1292	MYOF	T4	L1
sp|Q9NZM1|MYOF_HUMAN	APNLY[+16]MVPQGIRPVVQLTAIEILAWGLR	Myoferlin OS=Homo sapiens OX=9606 GN=MYOF PE=1 SV=1	Q9NZM1	1286	0.232656	0.190888	0.0331377	0.150497	0.19544	0.137272	0.127788	0.163425	0.0923243	MYOF	MYOF_Y[+16]1291	1291	MYOF	T4	L1
sp|Q9NZM1|MYOF_HUMAN	APNLYM[+32]VPQGIRPVVQLTAIEILAWGLR	Myoferlin OS=Homo sapiens OX=9606 GN=MYOF PE=1 SV=1	Q9NZM1	1286	0.0565372	0.329761	0.00336934	0.0250183	0.0099736	0.0242383	0.0120432	0.00890594	0.0151854	MYOF	MYOF_M[+32]1292	1292	MYOF	T4	L1
sp|Q9P003|CNIH4_HUMAN	YIMVP[+16]SGNMGVFDPTEIHNR	Protein cornichon homolog 4 OS=Homo sapiens OX=9606 GN=CNIH4 PE=1 SV=1	Q9P003	84	0.108439	0.111177	0.0918565	0.137436	0.177343	0.124948	0.0995138	0.149808	0.137349	CNIH4	CNIH4_P[+16]89	89	CNIH4	T4	L1
sp|Q9P003|CNIH4_HUMAN	YIM[+16]VPSGNMGVFDPTEIHNR	Protein cornichon homolog 4 OS=Homo sapiens OX=9606 GN=CNIH4 PE=1 SV=1	Q9P003	84	0.144735	0.123931	0.0993429	0.145265	0.169895	0.156044	0.110659	0.136426	0.103987	CNIH4	CNIH4_M[+16]87	87	CNIH4	T4	L1
sp|Q9P003|CNIH4_HUMAN	YIMVPSGNM[+16]GVFDPTEIHNR	Protein cornichon homolog 4 OS=Homo sapiens OX=9606 GN=CNIH4 PE=1 SV=1	Q9P003	84	0.114232	0.110493	0.0744795	0.1332	0.177396	0.127817	0.0982174	0.150148	0.137394	CNIH4	CNIH4_M[+16]93	93	CNIH4	T4	L1
sp|Q9P003|CNIH4_HUMAN	YIMVPSGNM[+32]GVFDPTEIHNR	Protein cornichon homolog 4 OS=Homo sapiens OX=9606 GN=CNIH4 PE=1 SV=1	Q9P003	84	0.0300793	0.175759	0.0110228	0.0141935	0.102145	0.043584	0.265568	0.03332	0.0296465	CNIH4	CNIH4_M[+32]93	93	CNIH4	T4	L1
sp|Q9UBM7|DHCR7_HUMAN	TASQGQW[+32]GR	7-dehydrocholesterol reductase OS=Homo sapiens OX=9606 GN=DHCR7 PE=1 SV=1	Q9UBM7	22	0.231402	0.193463	0.217096	0.205313	0.16873	0.224912	0.0303856	0.179789	0.230829	DHCR7	DHCR7_W[+32]29	29	DHCR7	T4	L1
sp|Q9UBM7|DHCR7_HUMAN	TASQGQW[+16]GR	7-dehydrocholesterol reductase OS=Homo sapiens OX=9606 GN=DHCR7 PE=1 SV=1	Q9UBM7	22	0.231779	0.238745	0.20526	0.209588	0.450212	0.225129	0.212189	0.190272	0.208774	DHCR7	DHCR7_W[+16]29	29	DHCR7	T4	L1
sp|Q9Y3A6|TMED5_HUMAN	YITGTDILDM[+16]KLEDILESINSIK	Transmembrane emp24 domain-containing protein 5 OS=Homo sapiens OX=9606 GN=TMED5 PE=1 SV=1	Q9Y3A6	141	0.0904759	0.370329	0.271511	0.175041	0.244486	0.11163	0.154968	0.38806	0.187356	TMED5	TMED5_M[+16]151	151	TMED5	T4	OUT
sp|Q9Y3A6|TMED5_HUMAN	YITGTDILDMK[+16]LEDILESINSIK	Transmembrane emp24 domain-containing protein 5 OS=Homo sapiens OX=9606 GN=TMED5 PE=1 SV=1	Q9Y3A6	141	0.0889177	0.370458	0.265984	0.175105	0.244578	0.0920315	0.0577292	0.0890112	0.187317	TMED5	TMED5_K[+16]152	152	TMED5	T4	OUT
sp|Q9Y4A5|TRRAP_HUMAN	LDLQF[+32]QAIK	Transformation/transcription domain-associated protein OS=Homo sapiens OX=9606 GN=TRRAP PE=1 SV=3	Q9Y4A5	1635	0.247362	0.281153	0.325227	0.353411	0.758235	0.72227	0.174324	0.287137	0.145769	TRRAP	TRRAP_F[+32]1640	1640	TRRAP	T4	L1

## Sheet: STableIb
Protein	Protein_Description	Protein_Accession	M1	M2	M3	M4	M5	M6	C1	C3	C2	Gene_name	STRING_type	AAPL_score	AAPL_type
sp|O94973|AP2A2_HUMAN	AP-2 complex subunit alpha-2 OS=Homo sapiens OX=9606 GN=AP2A2 PE=1 SV=2	O94973	0.00582806	0.00470575	0.00114942	0.00427947	0.0076843	0.00576257	0.00179623	0.00132705	0.00265325	AP2A2	T2	0.348344	L2
sp|P05023|AT1A1_HUMAN	Sodium/potassium-transporting ATPase subunit alpha-1 OS=Homo sapiens OX=9606 GN=ATP1A1 PE=1 SV=1	P05023	0.0634903	0.0529389	0.0377474	0.0450845	0.0928344	0.0456615	0.0380226	0.0378068	0.0411855	ATP1A1	Bait	\	Bait
sp|P16615|AT2A2_HUMAN	Sarcoplasmic/endoplasmic reticulum calcium ATPase 2 OS=Homo sapiens OX=9606 GN=ATP2A2 PE=1 SV=1	P16615	0.0568616	0.0585085	0.0424674	0.0584971	0.114679	0.0703044	0.0654496	0.0494358	0.0666165	ATP2A2	T1	2.45052	L1
sp|P20020|AT2B1_HUMAN	Plasma membrane calcium-transporting ATPase 1 OS=Homo sapiens OX=9606 GN=ATP2B1 PE=1 SV=4	P20020	0.00697006	0.00387161	0.00368375	0.00692088	0.0140634	0.0102839	0.00220297	0.00362649	0.00305773	ATP2B1	T1	1.70416	L1
sp|P21796|VDAC1_HUMAN	Voltage-dependent anion-selective channel protein 1 OS=Homo sapiens OX=9606 GN=VDAC1 PE=1 SV=2	P21796	0.0155411	0.0139194	0.0145463	0.0148925	0.0231169	0.0172567	0.00592534	0.00597092	0.00585412	VDAC1	T2	3.63025	L1
sp|P22695|QCR2_HUMAN	Cytochrome b-c1 complex subunit 2, mitochondrial OS=Homo sapiens OX=9606 GN=UQCRC2 PE=1 SV=3	P22695	0.0378364	0.0254806	0.0133303	0.0204868	0.0425415	0.0399608	0.0345373	0.0336484	0.022337	UQCRC2	T2	-0.0901767	OUT
sp|P35232|PHB_HUMAN	Prohibitin OS=Homo sapiens OX=9606 GN=PHB PE=1 SV=1	P35232	0.00137536	0.000951678	0.000791493	0.000982778	0.000626525	0.000781222	0.000463914	0.000653851	0.00068593	PHB	T2	0	OUT
sp|P45880|VDAC2_HUMAN	Voltage-dependent anion-selective channel protein 2 OS=Homo sapiens OX=9606 GN=VDAC2 PE=1 SV=2	P45880	0.00811602	0.00728615	0.00430377	0.00555669	0.00766484	0.00653156	0.00400061	0.00409255	0.00505367	VDAC2	T2	0.391311	L2
sp|P50990|TCPQ_HUMAN	T-complex protein 1 subunit theta OS=Homo sapiens OX=9606 GN=CCT8 PE=1 SV=4	P50990	0.0160318	0.00549946	0.011297	0.006639	0.018157	0.0113856	0.00631513	0.00589076	0.00486315	CCT8	T2	6.01149	L1
sp|P55084|ECHB_HUMAN	Trifunctional enzyme subunit beta, mitochondrial OS=Homo sapiens OX=9606 GN=HADHB PE=1 SV=3	P55084	0.0153084	0.00447449	0.017684	0.0119682	0.0139511	0.0179577	0.00847092	0.0113534	0.00606535	HADHB	T1	-0.55177	OUT
sp|Q00610|CLH1_HUMAN	Clathrin heavy chain 1 OS=Homo sapiens OX=9606 GN=CLTC PE=1 SV=5	Q00610	0.0276422	0.0119843	0.00943598	0.0168468	0.0327557	0.012867	0.00864627	0.0109237	0.0157833	CLTC	T2	7.56185	L1
sp|Q14573|ITPR3_HUMAN	Inositol 1,4,5-trisphosphate receptor type 3 OS=Homo sapiens OX=9606 GN=ITPR3 PE=1 SV=2	Q14573	0.00568052	0.00554957	0.00472856	0.00329718	0.00791767	0.0060189	0.000988897	0.00358451	0.00228072	ITPR3	T2	8.50587	L1
sp|Q9H0U4|RAB1B_HUMAN	Ras-related protein Rab-1B OS=Homo sapiens OX=9606 GN=RAB1B PE=1 SV=1	Q9H0U4	0.0123381	0.0101768	0.00775441	0.0249707	0.049449	0.0160136	0.02757	0.0133833	0.0269107	RAB1B	T2	-0.0213315	OUT
sp|O14653|GOSR2_HUMAN	Golgi SNAP receptor complex member 2 OS=Homo sapiens OX=9606 GN=GOSR2 PE=1 SV=2	O14653	0.00978364	0.00265977	0.474196	0.000803323	0.0451571	0.00534881	0.0289389	0.0103834	0.000834482	GOSR2	T3	3.96081	L1
sp|O15258|RER1_HUMAN	Protein RER1 OS=Homo sapiens OX=9606 GN=RER1 PE=1 SV=1	O15258	0.0921427	0.171993	0.00280556	0.00913537	0.0456276	0.0661694	0.0819594	0.0835519	0.0573599	RER1	T3	-0.520943	OUT
sp|O43169|CYB5B_HUMAN	Cytochrome b5 type B OS=Homo sapiens OX=9606 GN=CYB5B PE=1 SV=3	O43169	0.0528764	0.0633688	0.0466005	0.0599278	0.0515668	0.0689305	0.0469654	0.047885	0.0680268	CYB5B	T3	-0.605942	OUT
sp|O95406|CNIH1_HUMAN	Protein cornichon homolog 1 OS=Homo sapiens OX=9606 GN=CNIH1 PE=1 SV=1	O95406	0.389357	0.45132	0.395984	0.413283	0.529914	0.477985	0.567904	0.478355	0.597531	CNIH1	T3	-1.03779	OUT
sp|O95573|ACSL3_HUMAN	Long-chain-fatty-acid--CoA ligase 3 OS=Homo sapiens OX=9606 GN=ACSL3 PE=1 SV=3	O95573	0.277511	0.19422	0.273139	0.2342	0.321847	0.279148	0.242698	0.252553	0.259569	ACSL3	T3	-2.17043	OUT
sp|O96008|TOM40_HUMAN	Mitochondrial import receptor subunit TOM40 homolog OS=Homo sapiens OX=9606 GN=TOMM40 PE=1 SV=1	O96008	0.111481	0.0597454	0.0858965	0.112831	0.24531	0.156144	0.104213	0.153964	0.0992223	TOMM40	T3	0.251114	L2
sp|P00338|LDHA_HUMAN	L-lactate dehydrogenase A chain OS=Homo sapiens OX=9606 GN=LDHA PE=1 SV=2	P00338	0.0723398	0.0858831	0.179247	0.0792429	0.0653152	0.0669485	0.0467518	0.0644433	0.0880567	LDHA	T3	-2.23554	OUT
sp|P00387|NB5R3_HUMAN	NADH-cytochrome b5 reductase 3 OS=Homo sapiens OX=9606 GN=CYB5R3 PE=1 SV=3	P00387	0.057228	0.0309255	0.018408	0.0459891	0.0712325	0.0643387	0.0310494	0.0387418	0.065509	CYB5R3	T3	-2.13897	OUT
sp|P00395|COX1_HUMAN	Cytochrome c oxidase subunit 1 OS=Homo sapiens OX=9606 GN=MT-CO1 PE=1 SV=1	P00395	0.474309	0.572358	0.261523	0.389791	0.47074	0.493121	0.377581	0.457307	0.518281	MT-CO1	T3	-2.08759	OUT
sp|P02545|LMNA_HUMAN	Prelamin-A/C OS=Homo sapiens OX=9606 GN=LMNA PE=1 SV=1	P02545	0.00279357	0.0492085	0.0601643	0.052442	0.0573781	0.741302	0.0344267	0.0973121	0.024508	LMNA	T3	-1.11219	OUT
sp|P02786|TFR1_HUMAN	Transferrin receptor protein 1 OS=Homo sapiens OX=9606 GN=TFRC PE=1 SV=2	P02786	0.043915	0.117389	0.0647508	0.0358827	0.037516	0.0438859	0.055912	0.0347631	0.0518061	TFRC	T3	-5.63951	OUT
sp|P03891|NU2M_HUMAN	NADH-ubiquinone oxidoreductase chain 2 OS=Homo sapiens OX=9606 GN=MT-ND2 PE=1 SV=2	P03891	0.00682185	0.0270051	0.00588337	0.0369715	0.0104977	0.0130573	0.022161	0.0133444	0.0175377	MT-ND2	T3	0.0753753	OUT
sp|P04406|G3P_HUMAN	Glyceraldehyde-3-phosphate dehydrogenase OS=Homo sapiens OX=9606 GN=GAPDH PE=1 SV=3	P04406	0.100637	0.114726	0.114965	0.107788	0.0964109	0.0997491	0.104173	0.102729	0.133119	GAPDH	T3	-7.42456	OUT
sp|P05141|ADT2_HUMAN	ADP/ATP translocase 2 OS=Homo sapiens OX=9606 GN=SLC25A5 PE=1 SV=7	P05141	0.135861	0.167966	0.198908	0.127774	0.194494	0.137927	0.154779	0.128665	0.138264	SLC25A5	T3	0.791141	OUT
sp|P06748|NPM_HUMAN	Nucleophosmin OS=Homo sapiens OX=9606 GN=NPM1 PE=1 SV=2	P06748	0.038591	0.40185	0.0518441	0.0410448	0.0290409	0.0332353	0.00481428	0.0333791	0.0070943	NPM1	T3	2.5016	L1
sp|P07437|TBB5_HUMAN	Tubulin beta chain OS=Homo sapiens OX=9606 GN=TUBB PE=1 SV=2	P07437	0.0725281	0.047922	0.0740824	0.0486615	0.12766	0.0551678	0.0610097	0.0376887	0.0828089	TUBB	T3	-0.0736199	OUT
sp|P08195|4F2_HUMAN	4F2 cell-surface antigen heavy chain OS=Homo sapiens OX=9606 GN=SLC3A2 PE=1 SV=3	P08195	0.323417	0.104305	0.0651547	0.0932359	0.157622	0.242637	0.102788	0.082566	0.112483	SLC3A2	T3	-1.20265	OUT
sp|P08574|CY1_HUMAN	Cytochrome c1, heme protein, mitochondrial OS=Homo sapiens OX=9606 GN=CYC1 PE=1 SV=3	P08574	0.26025	0.20329	0.208178	0.217503	0.338075	0.294175	0.179326	0.295181	0.214498	CYC1	T3	-1.83274	OUT
sp|P10176|COX8A_HUMAN	Cytochrome c oxidase subunit 8A, mitochondrial OS=Homo sapiens OX=9606 GN=COX8A PE=1 SV=2	P10176	0.0666517	0.0291822	0.217363	0.140484	0.133812	0.108657	0.095497	0.116328	0.148398	COX8A	T3	-0.759885	OUT
sp|P10809|CH60_HUMAN	60 kDa heat shock protein, mitochondrial OS=Homo sapiens OX=9606 GN=HSPD1 PE=1 SV=2	P10809	0.230097	0.149238	0.137249	0.208895	0.282877	0.165622	0.217069	0.153294	0.198928	HSPD1	T3	-1.59326	OUT
sp|P11021|BIP_HUMAN	Endoplasmic reticulum chaperone BiP OS=Homo sapiens OX=9606 GN=HSPA5 PE=1 SV=2	P11021	0.0920926	0.473294	0.0555274	0.0514127	0.0736217	0.0702284	0.0327346	0.0567098	0.0571194	HSPA5	T3	0	OUT
sp|P12236|ADT3_HUMAN	ADP/ATP translocase 3 OS=Homo sapiens OX=9606 GN=SLC25A6 PE=1 SV=4	P12236	0.125502	0.151472	0.111153	0.107161	0.142465	0.137846	0.0981583	0.106913	0.106657	SLC25A6	T3	-4.61738	OUT
sp|P13667|PDIA4_HUMAN	Protein disulfide-isomerase A4 OS=Homo sapiens OX=9606 GN=PDIA4 PE=1 SV=2	P13667	0.328299	0.00280463	0.217923	0.31599	0.342604	0.198833	0.284996	0.211308	0.269274	PDIA4	T3	-1.31989	OUT
sp|P14625|ENPL_HUMAN	Endoplasmin OS=Homo sapiens OX=9606 GN=HSP90B1 PE=1 SV=1	P14625	0.329494	0.299762	0.256103	0.269165	0.287062	0.327598	0.175285	0.223852	0.147758	HSP90B1	T3	-0.464412	OUT
sp|P14854|CX6B1_HUMAN	Cytochrome c oxidase subunit 6B1 OS=Homo sapiens OX=9606 GN=COX6B1 PE=1 SV=2	P14854	0.0924667	0.0952143	0.0781016	0.0631096	0.0893993	0.0754366	0	0.0135473	0.0727544	COX6B1	T3	0.649513	L2
sp|P14927|QCR7_HUMAN	Cytochrome b-c1 complex subunit 7 OS=Homo sapiens OX=9606 GN=UQCRB PE=1 SV=2	P14927	0.166968	0.127808	0.0165256	0.0358422	0.47743	0.14354	0.0315466	0.0732821	0.055947	UQCRB	T3	0	OUT
sp|P18754|RCC1_HUMAN	Regulator of chromosome condensation OS=Homo sapiens OX=9606 GN=RCC1 PE=1 SV=1	P18754	0.160812	0.121688	0.107947	0.471913	0.435776	0.146932	0.590077	0.14696	0.227177	RCC1	T3	0.232775	OUT
sp|P20340|RAB6A_HUMAN	Ras-related protein Rab-6A OS=Homo sapiens OX=9606 GN=RAB6A PE=1 SV=3	P20340	0.105885	0.0494928	0.0574577	0.0386839	0.0477743	0.04918	0.0431971	0.0454066	0.053831	RAB6A	T3	-1.11698	OUT
sp|P20674|COX5A_HUMAN	Cytochrome c oxidase subunit 5A, mitochondrial OS=Homo sapiens OX=9606 GN=COX5A PE=1 SV=2	P20674	0.0536912	0.0592478	0.015224	0.0427462	0.0631252	0.0546912	0.0324179	0.0524388	0.0547859	COX5A	T3	-0.132041	OUT
sp|P26641|EF1G_HUMAN	Elongation factor 1-gamma OS=Homo sapiens OX=9606 GN=EEF1G PE=1 SV=3	P26641	0.0712533	0.110981	0.00990969	0.0437271	0.0561871	0.0487901	0.0501797	0.0849314	0.123142	EEF1G	T3	-2.62888	OUT
sp|P27797|CALR_HUMAN	Calreticulin OS=Homo sapiens OX=9606 GN=CALR PE=1 SV=1	P27797	0.240693	0.132297	0.0759342	0.0699653	0.136312	0.107984	0.0968268	0.104913	0.109789	CALR	T3	-1.81705	OUT
sp|P27824|CALX_HUMAN	Calnexin OS=Homo sapiens OX=9606 GN=CANX PE=1 SV=2	P27824	0.12776	0.087654	0.0916964	0.140647	0.119425	0.136175	0.111876	0.131949	0.0923671	CANX	T3	-12.1192	OUT
sp|P33947|ERD22_HUMAN	ER lumen protein-retaining receptor 2 OS=Homo sapiens OX=9606 GN=KDELR2 PE=1 SV=1	P33947	0.0216925	0.0179036	0.020161	0.0202469	0.0103668	0.0140874	0.0116484	0.0132304	0.0125978	KDELR2	T3	-0.0888781	OUT
sp|P48730|KC1D_HUMAN	Casein kinase I isoform delta OS=Homo sapiens OX=9606 GN=CSNK1D PE=1 SV=2	P48730	0.922246	0.506461	0.940985	0.407556	0.612731	0.446765	0.478187	0.502528	0.430148	CSNK1D	T3	0	OUT
sp|P49257|LMAN1_HUMAN	Protein ERGIC-53 OS=Homo sapiens OX=9606 GN=LMAN1 PE=1 SV=2	P49257	0.257042	0.224921	0.231981	0.277932	0.304497	0.274146	0.2409	0.271559	0.230315	LMAN1	T3	-2.33892	OUT
sp|P49368|TCPG_HUMAN	T-complex protein 1 subunit gamma OS=Homo sapiens OX=9606 GN=CCT3 PE=1 SV=4	P49368	0.0903591	0.060728	0.0463375	0.141836	0.107606	0.24728	0.259718	0.110913	0.153416	CCT3	T3	-2.08235	OUT
sp|P51149|RAB7A_HUMAN	Ras-related protein Rab-7a OS=Homo sapiens OX=9606 GN=RAB7A PE=1 SV=1	P51149	0.0408203	0.0983061	0.0419427	0.0286165	0.0749708	0.0521672	0.075801	0.0539953	0.0826173	RAB7A	T3	-2.65739	OUT
sp|P60709|ACTB_HUMAN	Actin, cytoplasmic 1 OS=Homo sapiens OX=9606 GN=ACTB PE=1 SV=1	P60709	0.168624	0.158027	0.132419	0.156871	0.284431	0.192612	0.187037	0.181056	0.186762	ACTB	T3	1.9569	L1
sp|P60842|IF4A1_HUMAN	Eukaryotic initiation factor 4A-I OS=Homo sapiens OX=9606 GN=EIF4A1 PE=1 SV=1	P60842	0.0192825	0.0146091	0.00127066	0.00466467	0.020824	0.00633363	0.0312937	0.00566714	0.00476436	EIF4A1	T3	1.24019	L1
sp|P61019|RAB2A_HUMAN	Ras-related protein Rab-2A OS=Homo sapiens OX=9606 GN=RAB2A PE=1 SV=1	P61019	0.0582601	0.104448	0.13335	0.0591347	0.0643293	0.0948197	0.145897	0.0433048	0.0531934	RAB2A	T3	-0.561981	OUT
sp|P61106|RAB14_HUMAN	Ras-related protein Rab-14 OS=Homo sapiens OX=9606 GN=RAB14 PE=1 SV=4	P61106	0.0872825	0.117988	0.101238	0.264405	0.131809	0.0944497	0.107975	0.100383	0.0870243	RAB14	T3	-0.271986	OUT
sp|P61158|ARP3_HUMAN	Actin-related protein 3 OS=Homo sapiens OX=9606 GN=ACTR3 PE=1 SV=3	P61158	0.474446	0.331738	0.167204	0.315097	0.461318	0.402144	0.203994	0.278208	0.331854	ACTR3	T3	-0.635459	OUT
sp|P61619|S61A1_HUMAN	Protein transport protein Sec61 subunit alpha isoform 1 OS=Homo sapiens OX=9606 GN=SEC61A1 PE=1 SV=2	P61619	0.113303	0.0687345	0.134227	0.208339	0.224094	0.15224	0.15787	0.257756	0.119458	SEC61A1	T3	-7.25803	OUT
sp|P62491|RB11A_HUMAN	Ras-related protein Rab-11A OS=Homo sapiens OX=9606 GN=RAB11A PE=1 SV=3	P62491	0.0369971	0.10313	0.0861581	0.16536	0.0875087	0.055848	0.147058	0.0780895	0.069139	RAB11A	T3	-1.20515	OUT
sp|P62826|RAN_HUMAN	GTP-binding nuclear protein Ran OS=Homo sapiens OX=9606 GN=RAN PE=1 SV=3	P62826	0.0831609	0.0690922	0.0763974	0.054987	0.0575905	0.115593	0.0765259	0.038545	0.0312862	RAN	T3	0.440424	OUT
sp|P68104|EF1A1_HUMAN	Elongation factor 1-alpha 1 OS=Homo sapiens OX=9606 GN=EEF1A1 PE=1 SV=1	P68104	0.342802	0.334802	0.178915	0.47216	0.528245	0.316216	0.382179	0.440425	0.306925	EEF1A1	T3	-4.53241	OUT
sp|P68363|TBA1B_HUMAN	Tubulin alpha-1B chain OS=Homo sapiens OX=9606 GN=TUBA1B PE=1 SV=1	P68363	0.0847333	0.244669	0.192003	0.139133	0.135125	0.103243	0.088715	0.0946831	0.117467	TUBA1B	T3	-1.12157	OUT
sp|Q05639|EF1A2_HUMAN	Elongation factor 1-alpha 2 OS=Homo sapiens OX=9606 GN=EEF1A2 PE=1 SV=1	Q05639	0.682337	0.302693	0.145003	0.249866	0.397744	0.349473	0.194607	0.24886	0.303304	EEF1A2	T3	-0.241653	OUT
sp|Q12797|ASPH_HUMAN	Aspartyl/asparaginyl beta-hydroxylase OS=Homo sapiens OX=9606 GN=ASPH PE=1 SV=3	Q12797	0.173659	0.381824	0.318885	0.7218	0.160205	0.652891	0.251201	0.0985438	0.185234	ASPH	T3	-1.72409	OUT
sp|Q12907|LMAN2_HUMAN	Vesicular integral-membrane protein VIP36 OS=Homo sapiens OX=9606 GN=LMAN2 PE=1 SV=1	Q12907	0.19888	0.121633	0.197603	0.197432	0.256853	0.246742	0.211136	0.19475	0.177263	LMAN2	T3	-1.38003	OUT
sp|Q13283|G3BP1_HUMAN	Ras GTPase-activating protein-binding protein 1 OS=Homo sapiens OX=9606 GN=G3BP1 PE=1 SV=1	Q13283	0.0479149	0.0675835	0.0763437	0.0587287	0.207991	0.159565	0.127238	0.0887772	0.133338	G3BP1	T3	0.885934	L2
sp|Q14108|SCRB2_HUMAN	Lysosome membrane protein 2 OS=Homo sapiens OX=9606 GN=SCARB2 PE=1 SV=2	Q14108	0.0146617	0.187482	0.00452286	0.00793915	0.0614355	0.0110739	0.0231935	0.0479345	0.0317669	SCARB2	T3	0.50235	L2
sp|Q14204|DYHC1_HUMAN	Cytoplasmic dynein 1 heavy chain 1 OS=Homo sapiens OX=9606 GN=DYNC1H1 PE=1 SV=5	Q14204	0.0806352	0.142947	0.126797	0.161561	0.19368	0.137709	0.283044	0.159087	0.167218	DYNC1H1	T3	-2.73105	OUT
sp|Q14697|GANAB_HUMAN	Neutral alpha-glucosidase AB OS=Homo sapiens OX=9606 GN=GANAB PE=1 SV=3	Q14697	0.0721033	0.0906464	0.0508288	0.0346685	0.059976	0.0722159	0.0437835	0.0451929	0.0746224	GANAB	T3	-0.178744	OUT
sp|Q15836|VAMP3_HUMAN	Vesicle-associated membrane protein 3 OS=Homo sapiens OX=9606 GN=VAMP3 PE=1 SV=3	Q15836	0.092347	0.0816623	0.107188	0.133531	0.406215	0.188818	0.200687	0.111147	0.207434	VAMP3	T3	0.285655	L2
sp|Q16678|CP1B1_HUMAN	Cytochrome P450 1B1 OS=Homo sapiens OX=9606 GN=CYP1B1 PE=1 SV=2	Q16678	0.850993	0.994223	0.958882	0.889931	0.884063	0.902776	0.985139	0.937985	0.851956	CYP1B1	T3	-0.667554	OUT
sp|Q6DD88|ATLA3_HUMAN	Atlastin-3 OS=Homo sapiens OX=9606 GN=ATL3 PE=1 SV=1	Q6DD88	0.189871	0.345419	0.250733	0.296954	0.337161	0.276888	0.219703	0.0874634	0.309663	ATL3	T3	-1.14078	OUT
sp|Q96A33|CCD47_HUMAN	Coiled-coil domain-containing protein 47 OS=Homo sapiens OX=9606 GN=CCDC47 PE=1 SV=1	Q96A33	0.197199	0.393759	0.19996	0.245272	0.311485	0.294993	0.16616	0.289331	0.212719	CCDC47	T3	-3.31826	OUT
sp|Q9BVK6|TMED9_HUMAN	Transmembrane emp24 domain-containing protein 9 OS=Homo sapiens OX=9606 GN=TMED9 PE=1 SV=2	Q9BVK6	0.133626	0.27799	0.237489	0.0582035	0.224637	0.130082	0.108833	0.269742	0.0838467	TMED9	T3	-1.11868	OUT
sp|Q9BWM7|SFXN3_HUMAN	Sideroflexin-3 OS=Homo sapiens OX=9606 GN=SFXN3 PE=1 SV=3	Q9BWM7	0.406929	0.105431	0.080953	0.0183815	0.385761	0.366417	0.110944	0.05097	0.0269307	SFXN3	T3	0	OUT
sp|Q9H3N1|TMX1_HUMAN	Thioredoxin-related transmembrane protein 1 OS=Homo sapiens OX=9606 GN=TMX1 PE=1 SV=1	Q9H3N1	0.0399074	0.0664968	0.0527201	0.0306784	0.0348492	0.0656233	0.0869525	0.0469877	0.0318631	TMX1	T3	-0.776506	OUT
sp|Q9H4M9|EHD1_HUMAN	EH domain-containing protein 1 OS=Homo sapiens OX=9606 GN=EHD1 PE=1 SV=2	Q9H4M9	0.200798	0.0998181	0.134656	0.181107	0.292427	0.236899	0.194969	0.179161	0.145899	EHD1	T3	0	OUT
sp|Q9HD20|AT131_HUMAN	Manganese-transporting ATPase 13A1 OS=Homo sapiens OX=9606 GN=ATP13A1 PE=1 SV=2	Q9HD20	0.267889	0.226209	0.320472	0.170496	0.2778	0.254121	0.217397	0.218953	0.237702	ATP13A1	T3	-0.0710113	OUT
sp|Q9NQC3|RTN4_HUMAN	Reticulon-4 OS=Homo sapiens OX=9606 GN=RTN4 PE=1 SV=2	Q9NQC3	0.0130131	0.0832181	0.061876	0.0839802	0.0599282	0.0540793	0.0549143	0.0642629	0.0982698	RTN4	T3	-1.51123	OUT
sp|Q9P0L0|VAPA_HUMAN	Vesicle-associated membrane protein-associated protein A OS=Homo sapiens OX=9606 GN=VAPA PE=1 SV=3	Q9P0L0	0.269215	0.26976	0.260886	0.33776	0.330112	0.358067	0.232844	0.325923	0.447775	VAPA	T3	-5.28832	OUT
sp|Q9UJS0|CMC2_HUMAN	Calcium-binding mitochondrial carrier protein Aralar2 OS=Homo sapiens OX=9606 GN=SLC25A13 PE=1 SV=2	Q9UJS0	0.132873	0.306899	0.0738942	0.187917	0.202399	0.120657	0.139741	0.18799	0.206841	SLC25A13	T3	0.243384	OUT
sp|Q9UJZ1|STML2_HUMAN	Stomatin-like protein 2, mitochondrial OS=Homo sapiens OX=9606 GN=STOML2 PE=1 SV=1	Q9UJZ1	0.047791	0.0210924	0.0947981	0.0232515	0.0422866	0.0230849	0.0201366	0.0320599	0.198336	STOML2	T3	-0.803901	OUT
sp|O00255|MEN1_HUMAN	Menin OS=Homo sapiens OX=9606 GN=MEN1 PE=1 SV=4	O00255	0.383197	0.157865	0.92036	0.147598	0.313065	0.341903	0	0.0390727	0.262596	MEN1	T4	0	OUT
sp|O00264|PGRC1_HUMAN	Membrane-associated progesterone receptor component 1 OS=Homo sapiens OX=9606 GN=PGRMC1 PE=1 SV=3	O00264	0.0628653	0.0809081	0.0732489	0.133093	0.105384	0.0988638	0.101801	0.111616	0.149399	PGRMC1	T4	-0.537975	OUT
sp|O14684|PTGES_HUMAN	Prostaglandin E synthase OS=Homo sapiens OX=9606 GN=PTGES PE=1 SV=2	O14684	0.14324	0.232858	0.194265	0.161965	0.203649	0.154702	0.162636	0.171461	0.274314	PTGES	T4	-4.89387	OUT
sp|O14880|MGST3_HUMAN	Microsomal glutathione S-transferase 3 OS=Homo sapiens OX=9606 GN=MGST3 PE=1 SV=1	O14880	0.0811052	0.0812044	0.0633172	0.108043	0.166002	0.0998152	0.0821338	0.0893939	0.109476	MGST3	T4	-0.528244	OUT
sp|O15173|PGRC2_HUMAN	Membrane-associated progesterone receptor component 2 OS=Homo sapiens OX=9606 GN=PGRMC2 PE=1 SV=1	O15173	0.117602	0.224674	0.164848	0.222075	0.209125	0.106912	0.232561	0.257628	0.214239	PGRMC2	T4	-1.06881	OUT
sp|O43795|MYO1B_HUMAN	Unconventional myosin-Ib OS=Homo sapiens OX=9606 GN=MYO1B PE=1 SV=3	O43795	0.0627185	0.0608858	0.0487682	0.0721622	0.0728438	0.0693131	0.0972943	0.0591244	0.0711988	MYO1B	T4	-3.2779	OUT
sp|O75369|FLNB_HUMAN	Filamin-B OS=Homo sapiens OX=9606 GN=FLNB PE=1 SV=2	O75369	0.251367	0.168131	0.181835	0.257331	0.37384	0.261473	0.282438	0.195985	0.192279	FLNB	T4	-4.28593	OUT
sp|O75915|PRAF3_HUMAN	PRA1 family protein 3 OS=Homo sapiens OX=9606 GN=ARL6IP5 PE=1 SV=1	O75915	0.0143752	0.00966245	0.00904444	0.0107315	0.00985842	0.00948398	0.00269113	0.0131037	0.012203	ARL6IP5	T4	-0.127663	OUT
sp|O95159|ZFPL1_HUMAN	Zinc finger protein-like 1 OS=Homo sapiens OX=9606 GN=ZFPL1 PE=1 SV=2	O95159	0.0487355	0.0461662	0.0459496	0.042927	0.0441603	0.0513623	0.0495739	0.0466393	0.0568381	ZFPL1	T4	-0.251084	OUT
sp|O95292|VAPB_HUMAN	Vesicle-associated membrane protein-associated protein B/C OS=Homo sapiens OX=9606 GN=VAPB PE=1 SV=3	O95292	0.313998	0.36109	0.206892	0.266672	0.39348	0.257263	0.270267	0.280769	0.339211	VAPB	T4	-2.42145	OUT
sp|O95347|SMC2_HUMAN	Structural maintenance of chromosomes protein 2 OS=Homo sapiens OX=9606 GN=SMC2 PE=1 SV=2	O95347	0.113952	0.348912	0.0103841	0.105377	0.142288	0.0863847	0.143121	0.198589	0.0993544	SMC2	T4	0	OUT
sp|O95471|CLD7_HUMAN	Claudin-7 OS=Homo sapiens OX=9606 GN=CLDN7 PE=1 SV=4	O95471	0.603557	0.53884	0.748868	0.597051	0.688682	0.70972	0.541154	0.66017	0.77952	CLDN7	T4	-1.39735	OUT
sp|P05187|PPB1_HUMAN	Alkaline phosphatase, placental type OS=Homo sapiens OX=9606 GN=ALPP PE=1 SV=2	P05187	0.247849	0.261041	0.267544	0.276852	0.28457	0.241397	0.286738	0.186086	0.271506	ALPP	T4	-2.10775	OUT
sp|P05556|ITB1_HUMAN	Integrin beta-1 OS=Homo sapiens OX=9606 GN=ITGB1 PE=1 SV=2	P05556	0.541836	0.451078	0.461454	0.463816	0.641252	0.542887	0.496377	0.366917	0.505645	ITGB1	T4	0.0874548	OUT
sp|P09758|TACD2_HUMAN	Tumor-associated calcium signal transducer 2 OS=Homo sapiens OX=9606 GN=TACSTD2 PE=1 SV=3	P09758	0.0178983	0.0398074	0.0326866	0.0488319	0.765666	0.0317222	0.0585785	0.0127076	0.0238633	TACSTD2	T4	31.0371	L1
sp|P0C6T2|OST4_HUMAN	Dolichyl-diphosphooligosaccharide--protein glycosyltransferase subunit 4 OS=Homo sapiens OX=9606 GN=OST4 PE=1 SV=1	P0C6T2	0.431075	0.109986	0.447211	0.462302	0.276825	0.262415	0.335964	0.236791	0.523966	OST4	T4	-0.122419	OUT
sp|P10620|MGST1_HUMAN	Microsomal glutathione S-transferase 1 OS=Homo sapiens OX=9606 GN=MGST1 PE=1 SV=1	P10620	0.279011	0.277965	0.206563	0.298282	0.241278	0.116258	0.0799443	0.0834573	0.569441	MGST1	T4	-1.76777	OUT
sp|P11233|RALA_HUMAN	Ras-related protein Ral-A OS=Homo sapiens OX=9606 GN=RALA PE=1 SV=1	P11233	0.0855639	0.0838893	0.104523	0.114013	0.0852716	0.0869473	0.091134	0.0999079	0.112226	RALA	T4	-0.724582	OUT
sp|P12956|XRCC6_HUMAN	X-ray repair cross-complementing protein 6 OS=Homo sapiens OX=9606 GN=XRCC6 PE=1 SV=2	P12956	0.136322	0.0828099	0.0631333	0.204376	0.0191118	0.1475	0.00127541	0.193885	0.215248	XRCC6	T4	-0.53018	OUT
sp|P14618|KPYM_HUMAN	Pyruvate kinase PKM OS=Homo sapiens OX=9606 GN=PKM PE=1 SV=4	P14618	0.0934169	0.120556	0.0655853	0.117437	0.165604	0.114645	0.119518	0.101112	0.193579	PKM	T4	-4.31915	OUT
sp|P15144|AMPN_HUMAN	Aminopeptidase N OS=Homo sapiens OX=9606 GN=ANPEP PE=1 SV=4	P15144	0.123686	0.11704	0.0956529	0.131697	0.209552	0.137482	0.114385	0.11622	0.125812	ANPEP	T4	-2.59155	OUT
sp|P17301|ITA2_HUMAN	Integrin alpha-2 OS=Homo sapiens OX=9606 GN=ITGA2 PE=1 SV=1	P17301	0.16249	0.166493	0.175288	0.22321	0.334172	0.21471	0.208134	0.160194	0.187738	ITGA2	T4	0.191223	L2
sp|P17693|HLAG_HUMAN	HLA class I histocompatibility antigen, alpha chain G OS=Homo sapiens OX=9606 GN=HLA-G PE=1 SV=1	P17693	0.744699	0.787299	0.257151	0.0199091	0.377915	0.138873	0.781298	0.0283346	0.520655	HLA-G	T4	0	OUT
sp|P18031|PTN1_HUMAN	Tyrosine-protein phosphatase non-receptor type 1 OS=Homo sapiens OX=9606 GN=PTPN1 PE=1 SV=1	P18031	0.139154	0.447297	0.102437	0.275377	0.182161	0.145683	0.164173	0.199844	0.322125	PTPN1	T4	-1.32504	OUT
sp|P18583|SON_HUMAN	Protein SON OS=Homo sapiens OX=9606 GN=SON PE=1 SV=4	P18583	0.0230834	0.0590345	0.16069	0.2194	0.284439	0.203076	0.212006	0.330254	0.343681	SON	T4	1.16573	L1
sp|P27449|VATL_HUMAN	V-type proton ATPase 16 kDa proteolipid subunit OS=Homo sapiens OX=9606 GN=ATP6V0C PE=1 SV=1	P27449	0.11234	0.000294191	0.0151181	0.0743264	0.166026	0.109213	0.0187493	0.0537987	0.0446042	ATP6V0C	T4	11.5893	L1
sp|P29317|EPHA2_HUMAN	Ephrin type-A receptor 2 OS=Homo sapiens OX=9606 GN=EPHA2 PE=1 SV=2	P29317	0.241092	0.385201	0.0437584	0.17332	0.31909	0.322922	0.330352	0.451725	0.222001	EPHA2	T4	-0.667406	OUT
sp|P29401|TKT_HUMAN	Transketolase OS=Homo sapiens OX=9606 GN=TKT PE=1 SV=3	P29401	0.0720995	0.063441	0.0199905	0.058491	0.0962889	0.0484601	0.010368	0.0639045	0.0469409	TKT	T4	0.574	L2
sp|P42167|LAP2B_HUMAN	Lamina-associated polypeptide 2, isoforms beta/gamma OS=Homo sapiens OX=9606 GN=TMPO PE=1 SV=2	P42167	0.264644	0.132919	0.0968503	0.102447	0.154244	0.119602	0.157201	0.129023	0.146352	TMPO	T4	-1.5118	OUT
sp|P43243|MATR3_HUMAN	Matrin-3 OS=Homo sapiens OX=9606 GN=MATR3 PE=1 SV=2	P43243	0.230771	0.0975585	0.169472	0.27583	0.215248	0.271677	0.292619	0.185029	0.242821	MATR3	T4	-0.302331	OUT
sp|P48509|CD151_HUMAN	CD151 antigen OS=Homo sapiens OX=9606 GN=CD151 PE=1 SV=3	P48509	0.0819691	0.0221867	0.0180965	0.102827	0.626544	0.258031	0.0757198	0.108573	0.041882	CD151	T4	6.77057	L1
sp|P50402|EMD_HUMAN	Emerin OS=Homo sapiens OX=9606 GN=EMD PE=1 SV=1	P50402	0.0829739	0.0712089	0.0871874	0.0722841	0.0809595	0.0800008	0.00504685	0.0779966	0.0768391	EMD	T4	-0.409652	OUT
sp|P50454|SERPH_HUMAN	Serpin H1 OS=Homo sapiens OX=9606 GN=SERPINH1 PE=1 SV=2	P50454	0.139727	0.120928	0.192437	0.146613	0.65554	0.00284441	0.0531367	0.243024	0.153523	SERPINH1	T4	3.24825	L1
sp|P53985|MOT1_HUMAN	Monocarboxylate transporter 1 OS=Homo sapiens OX=9606 GN=SLC16A1 PE=1 SV=3	P53985	0.0171405	1.2771e-05	0.00241618	0.0151642	0.0442572	0.0177937	0.000234216	0.00704679	0.00117994	SLC16A1	T4	58.1571	L1
sp|P60468|SC61B_HUMAN	Protein transport protein Sec61 subunit beta OS=Homo sapiens OX=9606 GN=SEC61B PE=1 SV=2	P60468	0.302202	0.336608	0.568575	0.349722	0.313508	0.330865	0.251602	0.262701	0.253242	SEC61B	T4	-1.69113	OUT
sp|P60903|S10AA_HUMAN	Protein S100-A10 OS=Homo sapiens OX=9606 GN=S100A10 PE=1 SV=2	P60903	0.0874079	0.129716	0.26214	0.11902	0.1263	0.131909	0.174506	0.170907	0.219449	S100A10	T4	0	OUT
sp|Q04637|IF4G1_HUMAN	Eukaryotic translation initiation factor 4 gamma 1 OS=Homo sapiens OX=9606 GN=EIF4G1 PE=1 SV=4	Q04637	0.124655	0.242989	0.127151	0.0843369	0.113466	0.587264	0.0929661	0.129428	0.128763	EIF4G1	T4	0.342706	OUT
sp|Q11201|SIA4A_HUMAN	CMP-N-acetylneuraminate-beta-galactosamide-alpha-2,3-sialyltransferase 1 OS=Homo sapiens OX=9606 GN=ST3GAL1 PE=2 SV=1	Q11201	0.458153	0.0943933	0.0950951	0.00794139	0.113519	0.376944	0.113902	0.374862	0.400444	ST3GAL1	T4	0	OUT
sp|Q13045|FLII_HUMAN	Protein flightless-1 homolog OS=Homo sapiens OX=9606 GN=FLII PE=1 SV=2	Q13045	0.513472	0.219362	0.074506	0.486171	0.489466	0.48426	0.464765	0.411486	0.564256	FLII	T4	0	OUT
sp|Q13740|CD166_HUMAN	CD166 antigen OS=Homo sapiens OX=9606 GN=ALCAM PE=1 SV=2	Q13740	0.0697058	0.0971549	0.0771002	0.0764184	0.115276	0.0576954	0.094217	0.0705032	0.0695062	ALCAM	T4	-1.73014	OUT
sp|Q14435|GALT3_HUMAN	Polypeptide N-acetylgalactosaminyltransferase 3 OS=Homo sapiens OX=9606 GN=GALNT3 PE=1 SV=2	Q14435	0.0533527	0.0592865	0.04116	0.0500251	0.053063	0.060592	0.052602	0.0466695	0.0483282	GALNT3	T4	-0.795912	OUT
sp|Q15041|AR6P1_HUMAN	ADP-ribosylation factor-like protein 6-interacting protein 1 OS=Homo sapiens OX=9606 GN=ARL6IP1 PE=1 SV=2	Q15041	0.0418088	0.00361633	0.0668968	0.0397119	0.00211157	0.0391879	0.0150742	0.0110009	0.139366	ARL6IP1	T4	-0.535824	OUT
sp|Q15149|PLEC_HUMAN	Plectin OS=Homo sapiens OX=9606 GN=PLEC PE=1 SV=3	Q15149	0.0381009	0.0482543	0.0629803	0.0543025	0.076638	0.0514541	0.0775895	0.0930114	0.114761	PLEC	T4	-12.3728	OUT
sp|Q16850|CP51A_HUMAN	Lanosterol 14-alpha demethylase OS=Homo sapiens OX=9606 GN=CYP51A1 PE=1 SV=3	Q16850	0.0252629	0.10215	0.0458294	0.038066	0.0772275	0.028253	0.0414754	0.00351739	0.072639	CYP51A1	T4	0.0762354	L2
sp|Q3ZCM7|TBB8_HUMAN	Tubulin beta-8 chain OS=Homo sapiens OX=9606 GN=TUBB8 PE=1 SV=2	Q3ZCM7	0.177931	0.131802	0.0788834	0.0988994	0.293731	0.153626	0.160438	0.0950301	0.179825	TUBB8	T4	0.106172	L2
sp|Q6PIU2|NCEH1_HUMAN	Neutral cholesterol ester hydrolase 1 OS=Homo sapiens OX=9606 GN=NCEH1 PE=1 SV=3	Q6PIU2	0.127012	0.132244	0.176828	0.12455	0.213175	0.166469	0.0954905	0.135918	0.138071	NCEH1	T4	0.563531	L2
sp|Q8N2K0|ABD12_HUMAN	Lysophosphatidylserine lipase ABHD12 OS=Homo sapiens OX=9606 GN=ABHD12 PE=1 SV=2	Q8N2K0	0.166575	0.140986	0.134141	0.240314	0.220844	0.157491	0.16707	0.185214	0.202021	ABHD12	T4	-0.355047	OUT
sp|Q8NFJ5|RAI3_HUMAN	Retinoic acid-induced protein 3 OS=Homo sapiens OX=9606 GN=GPRC5A PE=1 SV=2	Q8NFJ5	0.0458474	0.126989	0.122052	0.180801	0.115226	0.181027	0.0716136	0.0797546	0.302281	GPRC5A	T4	-0.59813	OUT
sp|Q8TC12|RDH11_HUMAN	Retinol dehydrogenase 11 OS=Homo sapiens OX=9606 GN=RDH11 PE=1 SV=2	Q8TC12	0.521195	0.952782	0.872122	0.498398	0.663787	0.643187	0.609477	0.524623	0.743066	RDH11	T4	-2.98128	OUT
sp|Q8TCJ2|STT3B_HUMAN	Dolichyl-diphosphooligosaccharide--protein glycosyltransferase subunit STT3B OS=Homo sapiens OX=9606 GN=STT3B PE=1 SV=1	Q8TCJ2	0.0540589	0.0847435	0.0465104	0.091607	0.0514914	0.0507491	0.0819169	0.0111962	0.0182016	STT3B	T4	0.673871	OUT
sp|Q92621|NU205_HUMAN	Nuclear pore complex protein Nup205 OS=Homo sapiens OX=9606 GN=NUP205 PE=1 SV=3	Q92621	0.488297	0.361108	0.372095	0.345266	0.308074	0.392564	0.380183	0.374354	0.402198	NUP205	T4	-0.843167	OUT
sp|Q96AG4|LRC59_HUMAN	Leucine-rich repeat-containing protein 59 OS=Homo sapiens OX=9606 GN=LRRC59 PE=1 SV=1	Q96AG4	0.050136	0.0151319	0.0488105	0.0376502	0.0473618	0.0567425	0.0498186	0.0304749	0.0381664	LRRC59	T4	-0.471766	OUT
sp|Q99640|PMYT1_HUMAN	Membrane-associated tyrosine- and threonine-specific cdc2-inhibitory kinase OS=Homo sapiens OX=9606 GN=PKMYT1 PE=1 SV=1	Q99640	0.115753	0.321997	0.366785	0.124429	0.119789	0.0509496	0.216924	0.159149	0.391677	PKMYT1	T4	0	OUT
sp|Q99805|TM9S2_HUMAN	Transmembrane 9 superfamily member 2 OS=Homo sapiens OX=9606 GN=TM9SF2 PE=1 SV=1	Q99805	0.206568	0.158819	0.0538934	0.189568	0.411468	0.230058	0.186746	0.167631	0.162297	TM9SF2	T4	5.32962	L1
sp|Q9BQG0|MBB1A_HUMAN	Myb-binding protein 1A OS=Homo sapiens OX=9606 GN=MYBBP1A PE=1 SV=2	Q9BQG0	0.212342	0.399971	0.271372	0.118035	0.365456	0.147195	0.0551247	0.0912009	0.362596	MYBBP1A	T4	2.95187	L1
sp|Q9BUN8|DERL1_HUMAN	Derlin-1 OS=Homo sapiens OX=9606 GN=DERL1 PE=1 SV=1	Q9BUN8	0.436482	0.353485	0.181002	0.177372	0.327764	0.3068	0.0981767	0.282031	0.314056	DERL1	T4	-0.318038	OUT
sp|Q9BW60|ELOV1_HUMAN	Elongation of very long chain fatty acids protein 1 OS=Homo sapiens OX=9606 GN=ELOVL1 PE=1 SV=1	Q9BW60	0.224369	0.393683	0.0653848	0.222535	0.326811	0.412201	0.0633617	0.246798	0.288248	ELOVL1	T4	-0.160632	OUT
sp|Q9BYG3|MK67I_HUMAN	MKI67 FHA domain-interacting nucleolar phosphoprotein OS=Homo sapiens OX=9606 GN=NIFK PE=1 SV=1	Q9BYG3	0.401325	0.19355	0.0947784	0.142185	0.479921	0.0326899	0.765166	0.198241	0.321032	NIFK	T4	0.696975	OUT
sp|Q9GZP9|DERL2_HUMAN	Derlin-2 OS=Homo sapiens OX=9606 GN=DERL2 PE=1 SV=1	Q9GZP9	0.133434	0.181684	0.0849336	0.0753515	0.138125	0.11672	0.12322	0.0981197	0.112825	DERL2	T4	0	OUT
sp|Q9H1C4|UN93B_HUMAN	Protein unc-93 homolog B1 OS=Homo sapiens OX=9606 GN=UNC93B1 PE=1 SV=2	Q9H1C4	0.376874	0.261354	0.0557858	0.175702	0.423646	0.477702	0.361636	0.260674	0.220506	UNC93B1	T4	0.134523	L2
sp|Q9H583|HEAT1_HUMAN	HEAT repeat-containing protein 1 OS=Homo sapiens OX=9606 GN=HEATR1 PE=1 SV=3	Q9H583	0.112217	0.0555176	0.0566747	0.0688057	0.0991767	0.108446	0.103012	0.116505	0.199626	HEATR1	T4	-1.06696	OUT
sp|Q9H9B4|SFXN1_HUMAN	Sideroflexin-1 OS=Homo sapiens OX=9606 GN=SFXN1 PE=1 SV=4	Q9H9B4	0.406929	0.105431	0.080953	0.0183815	0.385761	0.366417	0.112255	0.05097	0.0269307	SFXN1	T4	8.46936	L1
sp|Q9NZM1|MYOF_HUMAN	Myoferlin OS=Homo sapiens OX=9606 GN=MYOF PE=1 SV=1	Q9NZM1	0.406769	0.0595134	0.0943171	0.171467	0.33808	0.151023	0.223152	0.238374	0.0800338	MYOF	T4	1.79716	L1
sp|Q9P003|CNIH4_HUMAN	Protein cornichon homolog 4 OS=Homo sapiens OX=9606 GN=CNIH4 PE=1 SV=1	Q9P003	0.397486	0.52136	0.276702	0.430093	0.626779	0.452393	0.573958	0.469702	0.408376	CNIH4	T4	2.37007	L1
sp|Q9UBM7|DHCR7_HUMAN	7-dehydrocholesterol reductase OS=Homo sapiens OX=9606 GN=DHCR7 PE=1 SV=1	Q9UBM7	0.42507	0.0695082	0.0606747	0.34484	0.575202	0.101067	0.0504613	0.109055	0.131732	DHCR7	T4	11.2042	L1
sp|Q9Y3A6|TMED5_HUMAN	Transmembrane emp24 domain-containing protein 5 OS=Homo sapiens OX=9606 GN=TMED5 PE=1 SV=1	Q9Y3A6	0.179394	0.740787	0.537495	0.350146	0.489065	0.203661	0.212697	0.477071	0.374673	TMED5	T4	0.774693	OUT
sp|Q9Y4A5|TRRAP_HUMAN	Transformation/transcription domain-associated protein OS=Homo sapiens OX=9606 GN=TRRAP PE=1 SV=3	Q9Y4A5	0.247362	0.281153	0.325227	0.353411	0.758235	0.72227	0.174324	0.287137	0.145769	TRRAP	T4	1.39056	L1
