# Supplementary material for: A proximity labeling method for protein–protein interactions on cell membrane
Source: Chem Sci. 2022 Apr 30;13(20):6028–38. doi: 10.1039/d1sc06898a (PMC9132088; doi:10.1039/d1sc06898a)
Supplement: SC-013-D1SC06898A-s003 [file SC-013-D1SC06898A-s003.xlsx]

## Sheet: STableIIa
Protein	roundoxiseq	Protein_Description	Protein_Accession	Begin_Pos	M1	M2	M3	M4	M5	M6	C1	C3	C2	Gene	Oxidation	OxidationSite	Gene_name	STRING_type	AAPL_type
sp|O75131|CPNE3_HUMAN	VVLFEM[+16]EAR	Copine-3 OS=Homo sapiens GN=CPNE3 PE=1 SV=1	O75131	139	0.0942791	0.00822065	0.0159552	0.0449332	0.103268	0.0549283	0.0158023	0.0270383	0.0580134	CPNE3	CPNE3_M[+16]145	145	CPNE3	T2	L1
sp|O75131|CPNE3_HUMAN	ISLNSLCYGDM[+16]DK	Copine-3 OS=Homo sapiens GN=CPNE3 PE=1 SV=1	O75131	195	0.138196	0.0340252	0.0323726	0.166794	0.121192	0.0646256	0.0247945	0.0316937	0.0509057	CPNE3	CPNE3_M[+16]206	206	CPNE3	T2	L1
sp|O75131|CPNE3_HUMAN	VECYDYDNDGSHDLIGTFQTTM[+16]TK	Copine-3 OS=Homo sapiens GN=CPNE3 PE=1 SV=1	O75131	211	0.0648568	0.0172009	0.0125676	0.0653943	0.0497743	0.0194202	0.0121813	0.0185044	0.016675	CPNE3	CPNE3_M[+16]233	233	CPNE3	T2	L1
sp|P02786|TFR1_HUMAN	LAQMFSDM[+16]VLK	Transferrin receptor protein 1 OS=Homo sapiens GN=TFRC PE=1 SV=2	P02786	428	0.255111	0.122714	0.0247637	0.076146	0.393189	0.156217	0.0341728	0.0335293	0.0455024	TFR1	TFR1_M[+16]436	436	TFRC	T2	L1
sp|P04406|G3P_HUMAN	RVIISAPSADAPMFVM[+16]GVNHEK	Glyceraldehyde-3-phosphate dehydrogenase OS=Homo sapiens GN=GAPDH PE=1 SV=3	P04406	117	0.0776231	0.0666208	0.00689498	0.0171039	0.0556522	0.00509265	0.0142301	0.00750913	0.00974301	G3P	G3P_M[+16]133	133	GAPDH	T1	L1
sp|P04406|G3P_HUMAN	VIISAPSADAP[+16]MFVMGVNHEK	Glyceraldehyde-3-phosphate dehydrogenase OS=Homo sapiens GN=GAPDH PE=1 SV=3	P04406	118	0.0191429	0.00222416	0.00161283	0.00256292	0.0186823	0.0102185	0.00138525	0.0016599	0.00186134	G3P	G3P_P[+16]129	129	GAPDH	T1	L1
sp|P04406|G3P_HUMAN	VIISAPSADAPM[+16]FVMGVNHEK	Glyceraldehyde-3-phosphate dehydrogenase OS=Homo sapiens GN=GAPDH PE=1 SV=3	P04406	118	0.0807299	0.0337937	0.0138042	0.0457355	0.0639453	0.0355642	0.0179736	0.0186906	0.0285716	G3P	G3P_M[+16]130	130	GAPDH	T1	L1
sp|P04406|G3P_HUMAN	VIHDNFGIVEGLM[+16]TTVHAITATQK	Glyceraldehyde-3-phosphate dehydrogenase OS=Homo sapiens GN=GAPDH PE=1 SV=3	P04406	162	0.104772	0.0202269	0.0117763	0.0217206	0.0483101	0.0278901	0.0154458	0.0313903	0.0177466	G3P	G3P_M[+16]175	175	GAPDH	T1	L1
sp|P04406|G3P_HUMAN	LISW[+16]YDNEFGYSNR	Glyceraldehyde-3-phosphate dehydrogenase OS=Homo sapiens GN=GAPDH PE=1 SV=3	P04406	309	0.0630308	0.049304	0.011593	0.0146358	0.0347298	0.0247995	0.0144387	0.0104323	0.0175052	G3P	G3P_W[+16]313	313	GAPDH	T1	L1
sp|P04406|G3P_HUMAN	LISW[+32]YDNEFGYSNR	Glyceraldehyde-3-phosphate dehydrogenase OS=Homo sapiens GN=GAPDH PE=1 SV=3	P04406	309	0.021232	0.00100802	0.00111409	0.0023649	0.0344705	0.136047	0.000651417	0.000583729	0.000625477	G3P	G3P_W[+32]313	313	GAPDH	T1	L1
sp|P04406|G3P_HUMAN	WGDAGAEYVVESTGVFTTMEK[+16]	Glyceraldehyde-3-phosphate dehydrogenase OS=Homo sapiens GN=GAPDH PE=1 SV=3	P04406	86	0.0353865	0.00563535	0.00897898	0.0122433	0.0466207	0.012919	0.00674027	0.00967053	0.00768871	G3P	G3P_K[+16]107	107	GAPDH	T1	L1
sp|P04406|G3P_HUMAN	VDIVAINDPFIDLNYMVY[+16]MFQYDSTHGK	Glyceraldehyde-3-phosphate dehydrogenase OS=Homo sapiens GN=GAPDH PE=1 SV=3	P04406	27	0.0603216	0.0264231	0.0140047	0.0291407	0.0633878	0.0511757	0.0154497	0.0261734	0.0208425	G3P	G3P_Y[+16]45	45	GAPDH	T1	L1
sp|P04406|G3P_HUMAN	WGDAGAEYVVESTGVFTTM[+16]EK	Glyceraldehyde-3-phosphate dehydrogenase OS=Homo sapiens GN=GAPDH PE=1 SV=3	P04406	86	0.076599	0.021915	0.0133348	0.0253773	0.0766873	0.0351151	0.00496582	0.0235682	0.0217499	G3P	G3P_M[+16]105	105	GAPDH	T1	L1
sp|P04626|ERBB2_HUMAN	VCYGLGM[+16]EHLR	Receptor tyrosine-protein kinase erbB-2 OS=Homo sapiens GN=ERBB2 PE=1 SV=1	P04626	340	0.0870047	0.023274	0.0240933	0.027523	0.0516254	0.0215547	0.0184339	0.0187531	0.0246166	ERBB2	ERBB2_M[+16]347	347	ERBB2	Bait	Bait
sp|P04626|ERBB2_HUMAN	LPASPETHLDM[+16]LR	Receptor tyrosine-protein kinase erbB-2 OS=Homo sapiens GN=ERBB2 PE=1 SV=1	P04626	34	0.0553894	0.0332104	0.0281044	0.0404423	0.0358508	0.00920164	0.0217611	0.0186835	0.0251422	ERBB2	ERBB2_M[+16]45	45	ERBB2	Bait	Bait
sp|P04626|ERBB2_HUMAN	LLQETELVEPLTP[+16]SGAMPNQAQMR	Receptor tyrosine-protein kinase erbB-2 OS=Homo sapiens GN=ERBB2 PE=1 SV=1	P04626	689	0.0475039	0.0153121	0.0119735	0.0255513	0.0287522	0.0156928	0.0109731	0.0154061	0.0145767	ERBB2	ERBB2_P[+16]702	702	ERBB2	Bait	Bait
sp|P04626|ERBB2_HUMAN	LLGICLTSTVQLVTQLM[+16]PYGCLLDHVR	Receptor tyrosine-protein kinase erbB-2 OS=Homo sapiens GN=ERBB2 PE=1 SV=1	P04626	784	0.0575578	0.027551	0.041002	0.287612	0.0591007	0.0542261	0.0317953	0.0387257	0.0475586	ERBB2	ERBB2_M[+16]801	801	ERBB2	Bait	Bait
sp|P04626|ERBB2_HUMAN	WM[+16]ALESILR	Receptor tyrosine-protein kinase erbB-2 OS=Homo sapiens GN=ERBB2 PE=1 SV=1	P04626	887	0.231503	0.15113	0.100708	0.156437	0.185718	0.0360981	0.130721	0.0409634	0.0442427	ERBB2	ERBB2_M[+16]889	889	ERBB2	Bait	Bait
sp|P04626|ERBB2_HUMAN	SPLAPSEGAGSDVFDGDLGMGAAK[+16]	Receptor tyrosine-protein kinase erbB-2 OS=Homo sapiens GN=ERBB2 PE=1 SV=1	P04626	1072	0.326926	0.0734129	0.0503785	0.0915525	0.324645	0.23897	0.151567	0.119114	0.161351	ERBB2	ERBB2_K[+16]1096	1096	ERBB2	Bait	Bait
sp|P04626|ERBB2_HUMAN	LLQETELVEPLTPSGAM[+16]PNQAQMR	Receptor tyrosine-protein kinase erbB-2 OS=Homo sapiens GN=ERBB2 PE=1 SV=1	P04626	689	0.0475039	0.0153121	0.0119735	0.0255481	0.0287525	0.0156928	0.0109731	0.0154061	0.0159445	ERBB2	ERBB2_M[+16]706	706	ERBB2	Bait	Bait
sp|P06748|NPM_HUMAN	M[+16]SVQPTVSLGGFEITPPVVLR	Nucleophosmin OS=Homo sapiens GN=NPM1 PE=1 SV=2	P06748	80	0.0582528	0.0382623	0.0144327	0.050206	0.0669008	0.0404985	0.0080186	0.00844789	0.0185695	NPM	NPM_M[+16]81	81	NPM1	T2	OUT
sp|P11021|GRP78_HUMAN	STM[+16]KPVQK	78 kDa glucose-regulated protein OS=Homo sapiens GN=HSPA5 PE=1 SV=2	P11021	336	0.194664	0.143301	0.00915753	0.133087	0.0449251	0.106484	0.049645	0.0766948	0.125078	GRP78	GRP78_M[+16]339	339	HSPA5	T2	OUT
sp|P11142|HSP7C_HUMAN	NQVAM[+16]NPTNTVFDAK	Heat shock cognate 71 kDa protein OS=Homo sapiens GN=HSPA8 PE=1 SV=1	P11142	56	0.152747	0.244014	0.224349	0.281029	0.202046	0.0299984	0.229579	0.253153	0.23995	HSP7C	HSP7C_M[+16]61	61	HSPA8	T2	OUT
sp|P11142|HSP7C_HUMAN	M[+16]VNHFIAEFK	Heat shock cognate 71 kDa protein OS=Homo sapiens GN=HSPA8 PE=1 SV=1	P11142	236	0.049795	0.0286821	0.0277209	0.0105853	0.163012	0.0118446	0.0228442	0.023635	0.019008	HSP7C	HSP7C_M[+16]237	237	HSPA8	T2	OUT
sp|P18031|PTN1_HUMAN	M[+16]GLIQTADQLR	Tyrosine-protein phosphatase non-receptor type 1 OS=Homo sapiens GN=PTPN1 PE=1 SV=1	P18031	257	0.626562	0.339523	0.111438	0.143389	0.517053	0.620679	0.122604	0.119636	0.318637	PTN1	PTN1_M[+16]258	258	PTPN1	T2	L1
sp|P19367|HXK1_HUMAN	IYAIPIEIMQGTGEELFDHIVSCISDFLDY[+16]MGIK	Hexokinase-1 OS=Homo sapiens GN=HK1 PE=1 SV=3	P19367	558	0.136088	0.120065	0.0762771	0.0471054	0.0762007	0.219742	0.0631001	0.0979754	0.0887568	HXK1	HXK1_Y[+16]588	588	HK1	T2	OUT
sp|P19367|HXK1_HUMAN	LSDETLIDIM[+16]TR	Hexokinase-1 OS=Homo sapiens GN=HK1 PE=1 SV=3	P19367	30	0.072264	0.0123817	0.114969	0.0797113	0.0508934	0.0508774	0.0115018	0.00954206	0.11405	HXK1	HXK1_M[+16]40	40	HK1	T2	OUT
sp|P19367|HXK1_HUMAN	AEM[+16]ELGLR	Hexokinase-1 OS=Homo sapiens GN=HK1 PE=1 SV=3	P19367	492	0.120076	0.0636392	0.0711729	0.0691537	0.117265	0.0243142	0.0754014	0.0694102	0.0786885	HXK1	HXK1_M[+16]495	495	HK1	T2	OUT
sp|P49327|FAS_HUMAN	LGM[+16]LSPEGTCK	Fatty acid synthase OS=Homo sapiens GN=FASN PE=1 SV=3	P49327	202	0.155574	0.0516259	0.0857171	0.220073	0.193505	0.131039	0.0427668	0.039485	0.046831	FAS	FAS_M[+16]205	205	FASN	T1	L1
sp|P49327|FAS_HUMAN	DNWVSFMDTMLQM[+16]SILGSAK	Fatty acid synthase OS=Homo sapiens GN=FASN PE=1 SV=3	P49327	1023	0.114821	0.0236829	0.018348	0.0195381	0.0969408	0.026119	0.0149468	0.0221816	0.0214224	FAS	FAS_M[+16]1036	1036	FASN	T1	L1
sp|P49327|FAS_HUMAN	M[+16]VVPGLDGAQIPR	Fatty acid synthase OS=Homo sapiens GN=FASN PE=1 SV=3	P49327	1158	0.339921	0.144673	0.0976017	0.205187	0.361241	0.212057	0.150417	0.0935372	0.107129	FAS	FAS_M[+16]1159	1159	FASN	T1	L1
sp|P49327|FAS_HUMAN	W[+16]TSQDSLLGMEFSGR	Fatty acid synthase OS=Homo sapiens GN=FASN PE=1 SV=3	P49327	1591	0.038641	0.0117154	0.0178153	0.00563626	0.0695888	0.0252766	0.0117925	0.0153999	0.00988081	FAS	FAS_W[+16]1592	1592	FASN	T1	L1
sp|P49327|FAS_HUMAN	SLLVNPEGPTLM[+16]R	Fatty acid synthase OS=Homo sapiens GN=FASN PE=1 SV=3	P49327	2220	0.127234	0.0445005	0.0283503	0.0530002	0.220346	0.0646673	0.0318488	0.0418429	0.0334184	FAS	FAS_M[+16]2232	2232	FASN	T1	L1
sp|P49327|FAS_HUMAN	LPESENLQEFWDNLIGGVDM[+16]VTDDDRR	Fatty acid synthase OS=Homo sapiens GN=FASN PE=1 SV=3	P49327	12	0.0171621	0.00668443	0.00544906	0.0125069	0.0152536	0.0103509	0.00432338	0.00589078	0.00656911	FAS	FAS_M[+16]32	32	FASN	T1	L1
sp|P49327|FAS_HUMAN	QAHTM[+16]DPQLR	Fatty acid synthase OS=Homo sapiens GN=FASN PE=1 SV=3	P49327	70	0.132834	0.0459578	0.0317118	0.0624569	0.100894	0.0180564	0.0397701	0.0492912	0.0409788	FAS	FAS_M[+16]75	75	FASN	T1	L1
sp|P49327|FAS_HUMAN	VM[+16]GLVPAK	Fatty acid synthase OS=Homo sapiens GN=FASN PE=1 SV=3	P49327	1612	0.215947	0.068586	0.154919	0.196505	0.181091	0.30625	0.164819	0.106748	0.184778	FAS	FAS_M[+16]1614	1614	FASN	T1	L1
sp|P49327|FAS_HUMAN	HSQDLAFLSM[+16]LNDIAAVPATAMPFR	Fatty acid synthase OS=Homo sapiens GN=FASN PE=1 SV=3	P49327	443	0.10751	0.0355096	0.0329452	0.0629588	0.0858625	0.0465237	0.0371481	0.0263341	0.0389226	FAS	FAS_M[+16]453	453	FASN	T1	L1
sp|P49327|FAS_HUMAN	GGPEVQQVPAGERPLWFICSGMGTQW[+16]R	Fatty acid synthase OS=Homo sapiens GN=FASN PE=1 SV=3	P49327	477	0.0928632	0.0224218	0.0243962	0.00217984	0.0747697	0.251324	0.0164265	0.0285748	0.0318488	FAS	FAS_W[+16]503	503	FASN	T1	L1
sp|P49327|FAS_HUMAN	SNM[+16]GHPEPASGLAALAK	Fatty acid synthase OS=Homo sapiens GN=FASN PE=1 SV=3	P49327	326	0.162491	0.0191225	0.0111378	0.219384	0.2539	0.000142368	0.0163137	0.00102084	0.0123592	FAS	FAS_M[+16]329	329	FASN	T1	L1
sp|P49327|FAS_HUMAN	SYIIAGGLGGFGLELAQW[+32]LIQR	Fatty acid synthase OS=Homo sapiens GN=FASN PE=1 SV=3	P49327	1885	0.0189768	0.00228469	0.00268205	0.00635764	0.0138761	0.00858008	0.00324487	0.00284073	0.00458883	FAS	FAS_W[+32]1903	1903	FASN	T1	L1
sp|P49327|FAS_HUMAN	M[+16]ASCLEVLDLFLNQPHMVLSSFVLAEK	Fatty acid synthase OS=Homo sapiens GN=FASN PE=1 SV=3	P49327	2087	0.127738	0.08047	0.0505449	0.0614851	0.148283	0.116808	0.053416	0.0660852	0.07779	FAS	FAS_M[+16]2088	2088	FASN	T1	L1
sp|P49327|FAS_HUMAN	LTPGCEAEAETEAICFFVQQFTDM[+16]EHNR	Fatty acid synthase OS=Homo sapiens GN=FASN PE=1 SV=3	P49327	2354	0.121353	0.0413855	0.0333191	0.658889	0.111706	0.0668247	0.0293028	0.0340305	0.0365667	FAS	FAS_M[+16]2378	2378	FASN	T1	L1
sp|P67809|YBOX1_HUMAN	RPQYSNPPVQGEVM[+16]EGADNQGAGEQGRPVR	Nuclease-sensitive element-binding protein 1 OS=Homo sapiens GN=YBX1 PE=1 SV=3	P67809	204	0.0510819	0.00717776	0.00422849	0.0147161	0.0278968	0.0302037	0.00272208	0.00264711	0.00758795	YBOX1	YBOX1_M[+16]218	218	YBX1	T1	OUT
sp|Q9HCY8|S10AE_HUMAN	DLVTQQLPHLM[+16]PSNCGLEEK	Protein S100-A14 OS=Homo sapiens GN=S100A14 PE=1 SV=1	Q9HCY8	47	0.151398	0.0601418	0.0467345	0.0649757	0.090464	0.031871	0.0135836	0.0259036	0.0208388	S10AE	S10AE_M[+16]58	58	S100A14	T2	L1
sp|O15260|SURF4_HUMAN	SM[+16]FAGVPTMR	Surfeit locus protein 4 OS=Homo sapiens GN=SURF4 PE=1 SV=3	O15260	139	0.130449	0.0970901	0.0696054	0.0887634	0.0953507	0.146262	0.0940954	0.0767286	0.105507	SURF4	SURF4_M[+16]141	141	SURF4	T3	OUT
sp|O75396|SC22B_HUMAN	IM[+16]VANIEEVLQR	Vesicle-trafficking protein SEC22b OS=Homo sapiens GN=SEC22B PE=1 SV=4	O75396	147	0.0676947	0.0361819	0.0364406	0.0457014	0.0900177	0.0463318	0.0434816	0.0294162	0.0496689	SC22B	SC22B_M[+16]149	149	SEC22B	T3	OUT
sp|O75844|FACE1_HUMAN	DNLGFPVSDWLFSM[+16]WHYSHPPLLER	CAAX prenyl protease 1 homolog OS=Homo sapiens GN=ZMPSTE24 PE=1 SV=2	O75844	440	0.12206	0.0740577	0.069825	0.0797485	0.0796814	0.0788992	0.0592343	0.0700127	0.0761635	FACE1	FACE1_M[+16]454	454	ZMPSTE24	T3	OUT
sp|P00395|COX1_HUMAN	VLM[+16]VEEPSMNLEWLYGCPPPYHTFEEPVYMK	Cytochrome c oxidase subunit 1 OS=Homo sapiens GN=MT-CO1 PE=1 SV=1	P00395	481	0.184985	0.10266	0.0826633	0.162542	0.170626	0.110713	0.0853104	0.0895298	0.103606	COX1	COX1_M[+16]484	484	MT-CO1	T3	OUT
sp|P00403|COX2_HUMAN	MM[+16]ITSQDVLHSWAVPTLGLK	Cytochrome c oxidase subunit 2 OS=Homo sapiens GN=MT-CO2 PE=1 SV=1	P00403	151	0.13529	0.0857387	0.0615831	0.0864477	0.096026	0.0850181	0.04882	0.0614515	0.0838815	COX2	COX2_M[+16]153	153	MT-CO2	T3	OUT
sp|P00403|COX2_HUMAN	M[+16]MITSQDVLHSWAVPTLGLK	Cytochrome c oxidase subunit 2 OS=Homo sapiens GN=MT-CO2 PE=1 SV=1	P00403	151	0.135318	0.0857387	0.0615707	0.0864689	0.0960354	0.0850297	0.0489707	0.0614514	0.0838815	COX2	COX2_M[+16]152	152	MT-CO2	T3	OUT
sp|P04075|ALDOA_HUMAN	IGEHTPSALAIM[+16]ENANVLAR	Fructose-bisphosphate aldolase A OS=Homo sapiens GN=ALDOA PE=1 SV=2	P04075	153	0.0532552	0.114068	0.00631365	0.0369937	0.0522381	0.0982063	0.010567	0.00573562	0.0152948	ALDOA	ALDOA_M[+16]165	165	ALDOA	T3	L1
sp|P04843|RPN1_HUMAN	VHYENNSPFLTITSM[+16]TR	Dolichyl-diphosphooligosaccharide--protein glycosyltransferase subunit 1 OS=Homo sapiens GN=RPN1 PE=1 SV=1	P04843	215	0.153381	0.0385257	0.00987198	0.0318425	0.104664	0.000523086	0.00510052	0.00814624	0.00848944	RPN1	RPN1_M[+16]230	230	RPN1	T3	L1
sp|P04844|RPN2_HUMAN	TSFTPVGDVFELNFM[+16]NVK	Dolichyl-diphosphooligosaccharide--protein glycosyltransferase subunit 2 OS=Homo sapiens GN=RPN2 PE=1 SV=3	P04844	322	0.0673255	0.0170892	0.00948883	0.0138865	0.0431376	0.0151544	0.0127754	0.0142153	0.0184491	RPN2	RPN2_M[+16]337	337	RPN2	T3	L1
sp|P04844|RPN2_HUMAN	M[+16]LAQQAVK	Dolichyl-diphosphooligosaccharide--protein glycosyltransferase subunit 2 OS=Homo sapiens GN=RPN2 PE=1 SV=3	P04844	619	0.0989535	0.107652	0.0240697	0.12549	0.0311015	0.0456396	0.0491853	0.0374727	0.0694933	RPN2	RPN2_M[+16]620	620	RPN2	T3	L1
sp|P05023|AT1A1_HUMAN	MY[+16]PLKPTWWFCAFPYSLLIFVYDEVRK	Sodium/potassium-transporting ATPase subunit alpha-1 OS=Homo sapiens GN=ATP1A1 PE=1 SV=1	P05023	979	0.168153	0.167039	0.151349	0.107833	0.000736666	0.00128143	0.144622	0.167422	0.179379	AT1A1	AT1A1_Y[+16]981	981	ATP1A1	T3	OUT
sp|P05023|AT1A1_HUMAN	NSVFQQGMKNKILIF[+16]GLFEETALAAFLSYCPGMGVALR	Sodium/potassium-transporting ATPase subunit alpha-1 OS=Homo sapiens GN=ATP1A1 PE=1 SV=1	P05023	941	0.183382	0.204754	0.128451	0.0273093	0.318777	0.105081	0.143009	0.171593	0.206619	AT1A1	AT1A1_F[+16]956	956	ATP1A1	T3	OUT
sp|P05023|AT1A1_HUMAN	M[+16]YPLKPTWWFCAFPYSLLIFVYDEVRK	Sodium/potassium-transporting ATPase subunit alpha-1 OS=Homo sapiens GN=ATP1A1 PE=1 SV=1	P05023	979	0.190284	0.214716	0.150982	0.10166	0.195921	0.00126038	0.141218	0.166888	0.179909	AT1A1	AT1A1_M[+16]980	980	ATP1A1	T3	OUT
sp|P05141|ADT2_HUMAN	NTHIVISW[+16]MIAQTVTAVAGLTSYPFDTVR	ADP/ATP translocase 2 OS=Homo sapiens GN=SLC25A5 PE=1 SV=7	P05141	206	0.00939318	0.0126135	0.00622123	0.00466228	0.0074336	0.0345767	0.00634894	0.00408326	0.00918843	ADT2	ADT2_W[+16]214	214	SLC25A5	T3	OUT
sp|P05141|ADT2_HUMAN	NTHIVISWM[+32]IAQTVTAVAGLTSYPFDTVR	ADP/ATP translocase 2 OS=Homo sapiens GN=SLC25A5 PE=1 SV=7	P05141	206	0.0319905	0.00286856	0.00273635	0.00391714	0.0267244	0.00516956	0.00193703	0.00158568	0.00179647	ADT2	ADT2_M[+32]215	215	SLC25A5	T3	OUT
sp|P05141|ADT2_HUMAN	KGTDIM[+16]YTGTLDCWR	ADP/ATP translocase 2 OS=Homo sapiens GN=SLC25A5 PE=1 SV=7	P05141	244	0.115314	0.0472138	0.0259123	0.0732759	0.0858564	0.0546061	0.0328242	0.0366349	0.0462025	ADT2	ADT2_M[+16]250	250	SLC25A5	T3	OUT
sp|P05141|ADT2_HUMAN	GM[+16]GGAFVLVLYDEIKKYT	ADP/ATP translocase 2 OS=Homo sapiens GN=SLC25A5 PE=1 SV=7	P05141	280	0.288204	0.213145	0.177033	0.246597	0.275972	0.326806	0.173939	0.305044	0.239946	ADT2	ADT2_M[+16]282	282	SLC25A5	T3	OUT
sp|P05141|ADT2_HUMAN	GM[+16]LPDPKNTHIVISWMIAQTVTAVAGLTSYPFDTVR	ADP/ATP translocase 2 OS=Homo sapiens GN=SLC25A5 PE=1 SV=7	P05141	199	0.304491	0.19717	0.152968	0.220183	0.0233801	0.00358912	0.159071	0.161051	0.216767	ADT2	ADT2_M[+16]201	201	SLC25A5	T3	OUT
sp|P07237|PDIA1_HUMAN	LITLEEEM[+16]TK	Protein disulfide-isomerase OS=Homo sapiens GN=P4HB PE=1 SV=3	P07237	316	0.250641	0.151955	0.134485	0.206344	0.236419	0.149742	0.117436	0.130327	0.172716	PDIA1	PDIA1_M[+16]324	324	P4HB	T3	OUT
sp|P07237|PDIA1_HUMAN	KNVFVEFYAP[+16]WCGHCK	Protein disulfide-isomerase OS=Homo sapiens GN=P4HB PE=1 SV=3	P07237	385	0.195492	0.222935	0.234186	0.0484743	0.261684	0.271723	0.23525	0.196528	0.231966	PDIA1	PDIA1_P[+16]395	395	P4HB	T3	OUT
sp|P07237|PDIA1_HUMAN	KNVFVEFYAPW[+16]CGHCK	Protein disulfide-isomerase OS=Homo sapiens GN=P4HB PE=1 SV=3	P07237	385	0.167179	0.222913	0.233548	0.625467	0.261731	0.141668	0.269779	0.196592	0.232057	PDIA1	PDIA1_W[+16]396	396	P4HB	T3	OUT
sp|P07237|PDIA1_HUMAN	M[+16]DSTANEVEAVK	Protein disulfide-isomerase OS=Homo sapiens GN=P4HB PE=1 SV=3	P07237	424	0.150257	0.0985866	0.0985056	0.0593985	0.191606	0.136447	0.0786758	0.103556	0.117871	PDIA1	PDIA1_M[+16]425	425	P4HB	T3	OUT
sp|P09110|THIK_HUMAN	SITVTQDEGIRPSTTM[+16]EGLAK	3-ketoacyl-CoA thiolase, peroxisomal OS=Homo sapiens GN=ACAA1 PE=1 SV=2	P09110	238	0.00854985	0.0130324	0.015729	0.00900306	0.0342622	0.0110776	0.0159974	0.0106464	0.0150913	THIK	THIK_M[+16]254	254	ACAA1	T3	L2
sp|P09110|THIK_HUMAN	DVNLRPEQLGDICVGNVLQPGAGAIM[+16]AR	3-ketoacyl-CoA thiolase, peroxisomal OS=Homo sapiens GN=ACAA1 PE=1 SV=2	P09110	74	0.0653487	0.031811	0.023849	0.09295	0.0584082	0.0372724	0.0232932	0.0205662	0.0305865	THIK	THIK_M[+16]100	100	ACAA1	T3	L2
sp|P09758|TACD2_HUMAN	M[+16]TVCSPDGPGGR	Tumor-associated calcium signal transducer 2 OS=Homo sapiens GN=TACSTD2 PE=1 SV=3	P09758	40	0.0842623	0.254042	0.142365	0.380234	0.0467292	0.0723814	0.227956	0.00546632	0.195813	TACD2	TACD2_M[+16]41	41	TACSTD2	T3	OUT
sp|P09758|TACD2_HUMAN	ALGSGM[+16]AVDCSTLTSK	Tumor-associated calcium signal transducer 2 OS=Homo sapiens GN=TACSTD2 PE=1 SV=3	P09758	56	0.0614968	0.0174632	0.0130059	0.330384	0.0417662	0.0210029	0.0510004	0.0116489	0.0163726	TACD2	TACD2_M[+16]62	62	TACSTD2	T3	OUT
sp|P10809|CH60_HUMAN	GVM[+16]LAVDAVIAELKK	60 kDa heat shock protein, mitochondrial OS=Homo sapiens GN=HSPD1 PE=1 SV=2	P10809	142	0.0965618	0.00352099	0.0146341	0.027748	0.0516543	0.00433457	0.00329308	0.011764	0.00727579	CH60	CH60_M[+16]145	145	HSPD1	T3	L1
sp|P10809|CH60_HUMAN	ALMLQGVDLLADAVAVTM[+16]GPK	60 kDa heat shock protein, mitochondrial OS=Homo sapiens GN=HSPD1 PE=1 SV=2	P10809	37	0.121675	0.0542615	0.0369377	0.039828	0.0821856	0.0377758	0.0384647	0.039545	0.0324041	CH60	CH60_M[+16]55	55	HSPD1	T3	L1
sp|P12236|ADT3_HUMAN	GM[+16]GGAFVLVLYDELKK	ADP/ATP translocase 3 OS=Homo sapiens GN=SLC25A6 PE=1 SV=4	P12236	280	0.206236	0.217556	0.201353	0.151789	0.12959	0.206706	0.0989112	0.200095	0.137688	ADT3	ADT3_M[+16]282	282	SLC25A6	T3	OUT
sp|P12236|ADT3_HUMAN	GM[+16]LPDPKNTHIVVSWMIAQTVTAVAGVVSYPFDTVR	ADP/ATP translocase 3 OS=Homo sapiens GN=SLC25A6 PE=1 SV=4	P12236	199	0.170265	0.169623	0.0845874	0.0298268	0.0574312	2.88991e-05	0.0783657	0.0637573	0.0771776	ADT3	ADT3_M[+16]201	201	SLC25A6	T3	OUT
sp|P13010|XRCC5_HUMAN	ASFEEASNQLINHIEQFLDTNETPYFMK[+16]	X-ray repair cross-complementing protein 5 OS=Homo sapiens GN=XRCC5 PE=1 SV=3	P13010	606	0.186708	0.0153481	0.0129231	0.0471131	0.24774	0.448413	0.00922184	0.0144505	0.0102691	XRCC5	XRCC5_K[+16]634	634	XRCC5	T3	L1
sp|P13639|EF2_HUMAN	W[+16]LPAGDALLQMITIHLPSPVTAQK	Elongation factor 2 OS=Homo sapiens GN=EEF2 PE=1 SV=4	P13639	342	0.106049	0.0341618	0.0216452	0.0390651	0.0717785	0.0610048	0.0201084	0.0253905	0.0207304	EF2	EF2_W[+16]343	343	EEF2	T3	L1
sp|P16435|NCPR_HUMAN	VYM[+16]GEMGR	NADPH--cytochrome P450 reductase OS=Homo sapiens GN=POR PE=1 SV=2	P16435	257	0.0723638	0.0511836	0.0317593	0.00811352	0.0498564	0.0816169	0.0332038	0.0134091	0.0476851	NCPR	NCPR_M[+16]260	260	POR	T3	OUT
sp|P16435|NCPR_HUMAN	HLM[+16]HLELDISDSK	NADPH--cytochrome P450 reductase OS=Homo sapiens GN=POR PE=1 SV=2	P16435	298	0.485398	0.49679	0.00301781	0.102913	0.0478332	0.435375	0.0969983	0.49528	0.0253655	NCPR	NCPR_M[+16]301	301	POR	T3	OUT
sp|P16435|NCPR_HUMAN	DVQNTFYDIVAELGAM[+16]EHAQAVDYIK	NADPH--cytochrome P450 reductase OS=Homo sapiens GN=POR PE=1 SV=2	P16435	637	0.0717535	0.0319651	0.021787	0.0405699	0.0620347	0.0454442	0.0213158	0.0244216	0.0272738	NCPR	NCPR_M[+16]653	653	POR	T3	OUT
sp|P16435|NCPR_HUMAN	ALVPM[+16]FVR	NADPH--cytochrome P450 reductase OS=Homo sapiens GN=POR PE=1 SV=2	P16435	506	0.206461	0.0469129	0.0889145	0.113932	0.106817	0.0763266	0.0234889	0.0789659	0.0911078	NCPR	NCPR_M[+16]511	511	POR	T3	OUT
sp|P16435|NCPR_HUMAN	ATTPVIM[+16]VGPGTGVAPFIGFIQER	NADPH--cytochrome P450 reductase OS=Homo sapiens GN=POR PE=1 SV=2	P16435	523	0.109264	0.0325834	0.025327	0.0436004	0.0601898	0.0262626	0.0231747	0.0256387	0.0341101	NCPR	NCPR_M[+16]530	530	POR	T3	OUT
sp|P16615|AT2A2_HUMAN	M[+16]NVFDTELK	Sarcoplasmic/endoplasmic reticulum calcium ATPase 2 OS=Homo sapiens GN=ATP2A2 PE=1 SV=1	P16615	451	0.167729	0.0749911	0.0656024	0.0704273	0.0226341	0.095754	0.0516496	0.0467291	0.0852121	AT2A2	AT2A2_M[+16]452	452	ATP2A2	T3	OUT
sp|P20340|RAB6A_HUMAN	VAAALPGM[+16]ESTQDR	Ras-related protein Rab-6A OS=Homo sapiens GN=RAB6A PE=1 SV=3	P20340	169	0.0814374	0.012744	0.00941201	0.0143252	0.0706814	0.00453529	0.191741	0.00780502	0.0133073	RAB6A	RAB6A_M[+16]177	177	RAB6A	T3	OUT
sp|P20674|COX5A_HUMAN	GINTLVTYDM[+16]VPEPK	Cytochrome c oxidase subunit 5A, mitochondrial OS=Homo sapiens GN=COX5A PE=1 SV=2	P20674	72	0.120768	0.0167937	0.0100112	0.0211969	0.109436	0.0603823	0.00412354	0.00726355	0.0067092	COX5A	COX5A_M[+16]82	82	COX5A	T3	L1
sp|P21796|VDAC1_HUMAN	W[+16]TEYGLTFTEK	Voltage-dependent anion-selective channel protein 1 OS=Homo sapiens GN=VDAC1 PE=1 SV=2	P21796	63	0.00832728	0.0222831	0.0108373	0.0125404	0.0185055	0.0179274	0.0157394	0.0108743	0.0123809	VDAC1	VDAC1_W[+16]64	64	VDAC1	T3	L1
sp|P21796|VDAC1_HUMAN	EHINLGCDM[+16]DFDIAGPSIR	Voltage-dependent anion-selective channel protein 1 OS=Homo sapiens GN=VDAC1 PE=1 SV=2	P21796	120	0.144455	0.0345531	0.0230287	0.0339148	0.0940888	0.0342019	0.0216419	0.0268394	0.0333826	VDAC1	VDAC1_M[+16]129	129	VDAC1	T3	L1
sp|P27824|CALX_HUMAN	WKPPM[+16]IDNPSYQGIWKPR	Calnexin OS=Homo sapiens GN=CANX PE=1 SV=2	P27824	382	0.116842	0.0188698	0.0362653	0.0165425	0.0681696	0.0376492	0.0131065	0.013721	0.0222206	CALX	CALX_M[+16]387	387	CANX	T3	L1
sp|P27824|CALX_HUMAN	W[+16]KPPMIDNPSYQGIWKPR	Calnexin OS=Homo sapiens GN=CANX PE=1 SV=2	P27824	382	0.116459	0.00856578	0.0362335	0.0131276	0.068098	0.0435237	0.00991652	0.0101633	0.0115847	CALX	CALX_W[+16]383	383	CANX	T3	L1
sp|P27824|CALX_HUMAN	KTHLYTLILNPDNSFEILVDQSVVNSGNLLNDM[+16]TPPVNPSR	Calnexin OS=Homo sapiens GN=CANX PE=1 SV=2	P27824	233	0.200122	0.0523031	0.0372064	0.0500747	0.195773	0.0603254	0.0371469	0.028994	0.0561656	CALX	CALX_M[+16]266	266	CANX	T3	L1
sp|P27824|CALX_HUMAN	WKP[+16]PMIDNPSYQGIWKPR	Calnexin OS=Homo sapiens GN=CANX PE=1 SV=2	P27824	382	0.0533971	0.0192095	0.0169533	0.0178973	0.0807335	0.0394244	0.00589048	0.01325	0.0179218	CALX	CALX_P[+16]385	385	CANX	T3	L1
sp|P30101|PDIA3_HUMAN	M[+16]DATANDVPSPYEVR	Protein disulfide-isomerase A3 OS=Homo sapiens GN=PDIA3 PE=1 SV=4	P30101	433	0.0965618	0.00992472	0.00272518	0.111451	0.0919039	0.0073204	0.000990288	0.102878	0.0106089	PDIA3	PDIA3_M[+16]434	434	PDIA3	T3	L2
sp|P31930|QCR1_HUMAN	M[+16]VLAAAGGVEHQQLLDLAQK	Cytochrome b-c1 complex subunit 1, mitochondrial OS=Homo sapiens GN=UQCRC1 PE=1 SV=3	P31930	228	0.27725	0.055753	0.034384	0.0447774	0.206645	0.0313477	0.039231	0.0389461	0.0427164	QCR1	QCR1_M[+16]229	229	UQCRC1	T3	L2
sp|P31930|QCR1_HUMAN	EVESMGAH[+16]LNAYSTR	Cytochrome b-c1 complex subunit 1, mitochondrial OS=Homo sapiens GN=UQCRC1 PE=1 SV=3	P31930	111	0.145129	0.0413315	0.041866	0.0617055	0.129997	0.0359857	0.0742695	0.0422773	0.048566	QCR1	QCR1_H[+16]119	119	UQCRC1	T3	L2
sp|P31930|QCR1_HUMAN	EVESM[+16]GAHLNAYSTR	Cytochrome b-c1 complex subunit 1, mitochondrial OS=Homo sapiens GN=UQCRC1 PE=1 SV=3	P31930	111	0.182477	0.0329703	0.0208017	0.0724828	0.00643093	0.0326024	0.0628784	0.0401639	0.0426318	QCR1	QCR1_M[+16]116	116	UQCRC1	T3	L2
sp|P39656|OST48_HUMAN	GVGM[+16]VADPDNPLVLDILTGSSTSYSFFPDKPITQYPHAVGK	Dolichyl-diphosphooligosaccharide--protein glycosyltransferase 48 kDa subunit OS=Homo sapiens GN=DDOST PE=1 SV=4	P39656	198	0.157005	0.0352959	0.0441111	0.0603325	0.109609	0.0431634	0.050328	0.0351483	0.0366324	OST48	OST48_M[+16]202	202	DDOST	T3	OUT
sp|P39656|OST48_HUMAN	FIPSAYPYYASAFSMMLGLFIFSIVFLHMK[+16]EK	Dolichyl-diphosphooligosaccharide--protein glycosyltransferase 48 kDa subunit OS=Homo sapiens GN=DDOST PE=1 SV=4	P39656	420	0.756544	0.239674	0.589199	0.541717	0.78891	0.536222	0.484429	0.207103	0.60512	OST48	OST48_K[+16]450	450	DDOST	T3	OUT
sp|P40939|ECHA_HUMAN	ADM[+16]VIEAVFEDLSLK	Trifunctional enzyme subunit alpha, mitochondrial OS=Homo sapiens GN=HADHA PE=1 SV=2	P40939	440	0.494685	0.314455	0.229824	0.239045	0.535923	0.34788	0.165307	0.205305	0.191425	ECHA	ECHA_M[+16]443	443	HADHA	T3	L1
sp|P49257|LMAN1_HUMAN	GAGMP[+16]GQHGQITQQELDTVVK	Protein ERGIC-53 OS=Homo sapiens GN=LMAN1 PE=1 SV=2	P49257	373	0.911391	0.907082	0.913203	0.900912	0.828847	0.844593	0.905352	0.915994	0.899922	LMAN1	LMAN1_P[+16]378	378	LMAN1	T3	OUT
sp|P49257|LMAN1_HUMAN	LVSGMQH[+16]PGSAGGVYETTQHFIDIK	Protein ERGIC-53 OS=Homo sapiens GN=LMAN1 PE=1 SV=2	P49257	415	0.121205	0.0472664	0.0164827	0.129853	0.0812971	0.0516305	0.100684	0.0394884	0.129892	LMAN1	LMAN1_H[+16]422	422	LMAN1	T3	OUT
sp|P49755|TMEDA_HUMAN	IPDQLVILDM[+16]K	Transmembrane emp24 domain-containing protein 10 OS=Homo sapiens GN=TMED10 PE=1 SV=2	P49755	116	0.120026	0.0155296	0.0103687	0.0460038	0.0612473	0.0283856	0.0152905	0.00785894	0.0294725	TMEDA	TMEDA_M[+16]126	126	TMED10	T3	L2
sp|P50416|CPT1A_HUMAN	AM[+16]VDPAQTVEQR	Carnitine O-palmitoyltransferase 1, liver isoform OS=Homo sapiens GN=CPT1A PE=1 SV=2	P50416	617	0.066991	0.0845291	0.0558484	0.0943672	0.139145	0.0107833	0.313541	0.0678998	0.0107795	CPT1A	CPT1A_M[+16]619	619	CPT1A	T3	OUT
sp|P51148|RAB5C_HUMAN	TAMNVNEIFM[+16]AIAK	Ras-related protein Rab-5C OS=Homo sapiens GN=RAB5C PE=1 SV=2	P51148	166	0.124442	0.0523164	0.03181	0.064554	0.0995229	0.0474254	0.0244032	0.0307946	0.0402184	RAB5C	RAB5C_M[+16]176	176	RAB5C	T3	OUT
sp|P51148|RAB5C_HUMAN	AVEFQEAQAYADDNSLLF[+16]METSAK	Ras-related protein Rab-5C OS=Homo sapiens GN=RAB5C PE=1 SV=2	P51148	142	0.0695728	0.0174709	0.0150426	0.021827	0.0344655	0.00102433	0.016687	0.0195516	0.0163074	RAB5C	RAB5C_F[+16]160	160	RAB5C	T3	OUT
sp|P51148|RAB5C_HUMAN	AVEFQEAQAYADDNSLLFM[+16]ETSAK	Ras-related protein Rab-5C OS=Homo sapiens GN=RAB5C PE=1 SV=2	P51148	142	0.0695894	0.0174709	0.0150426	0.0218393	0.0344655	0.00108438	0.0166953	0.0195548	0.016809	RAB5C	RAB5C_M[+16]161	161	RAB5C	T3	OUT
sp|P51148|RAB5C_HUMAN	TAM[+16]NVNEIFMAIAK	Ras-related protein Rab-5C OS=Homo sapiens GN=RAB5C PE=1 SV=2	P51148	166	0.0524003	0.0379727	0.00985801	0.0765288	0.0397055	0.0659535	0.0104983	0.0303787	0.0507638	RAB5C	RAB5C_M[+16]169	169	RAB5C	T3	OUT
sp|P51571|SSRD_HUMAN	VQNM[+16]ALYADVGGK	Translocon-associated protein subunit delta OS=Homo sapiens GN=SSR4 PE=1 SV=1	P51571	60	0.159766	0.0699303	0.0170437	0.0862089	0.203781	0.272205	0.0453678	0.0341627	0.0634772	SSRD	SSRD_M[+16]64	64	SSR4	T3	L2
sp|P51572|BAP31_HUMAN	VNLQNNPGAMEH[+16]FHMK	B-cell receptor-associated protein 31 OS=Homo sapiens GN=BCAP31 PE=1 SV=3	P51572	79	0.10148	0.00328874	0.000648843	0.0018193	0.104653	0.0621397	0.00193989	0.0499632	0.000908212	BAP31	BAP31_H[+16]91	91	BCAP31	T3	OUT
sp|P51572|BAP31_HUMAN	AENQVLAM[+16]R	B-cell receptor-associated protein 31 OS=Homo sapiens GN=BCAP31 PE=1 SV=3	P51572	204	0.0733705	0.0493498	0.0808161	0.0675488	0.0854082	0.102509	0.0175529	0.0332314	0.126394	BAP31	BAP31_M[+16]212	212	BCAP31	T3	OUT
sp|P53007|TXTP_HUMAN	FGMFEFLSNH[+16]MR	Tricarboxylate transport protein, mitochondrial OS=Homo sapiens GN=SLC25A1 PE=1 SV=2	P53007	101	0.12076	0.0623318	0.0492438	0.0847044	0.0976401	0.0815757	0.0508341	0.0541515	0.0630987	TXTP	TXTP_H[+16]111	111	SLC25A1	T3	OUT
sp|P53007|TXTP_HUMAN	FGMFEFLSNHM[+16]R	Tricarboxylate transport protein, mitochondrial OS=Homo sapiens GN=SLC25A1 PE=1 SV=2	P53007	101	0.120963	0.0625251	0.0492437	0.0847034	0.097668	0.0789915	0.0536587	0.0541599	0.0630553	TXTP	TXTP_M[+16]112	112	SLC25A1	T3	OUT
sp|P60468|SC61B_HUMAN	TTSAGTGGMW[+16]R	Protein transport protein Sec61 subunit beta OS=Homo sapiens GN=SEC61B PE=1 SV=2	P60468	46	0.103004	0.0775389	0.0616718	0.093291	0.140134	0.0388581	0.0710692	0.0792974	0.0826698	SC61B	SC61B_W[+16]56	56	SEC61B	T3	OUT
sp|P61619|S61A1_HUMAN	GM[+16]EFEGAIIALFHLLATR	Protein transport protein Sec61 subunit alpha isoform 1 OS=Homo sapiens GN=SEC61A1 PE=1 SV=2	P61619	205	0.342729	0.305001	0.250056	0.27034	0.330102	0.509469	0.215775	0.26105	0.273956	S61A1	S61A1_M[+16]207	207	SEC61A1	T3	OUT
sp|P62820|RAB1A_HUMAN	M[+16]GPGATAGGAEK	Ras-related protein Rab-1A OS=Homo sapiens GN=RAB1A PE=1 SV=3	P62820	175	0.0889541	0.0453214	0.0299035	0.0222966	0.0567199	0.00203577	0.0318099	0.0104364	0.0434149	RAB1A	RAB1A_M[+16]176	176	RAB1A	T3	OUT
sp|Q00325|MPCP_HUMAN	M[+16]YKEEGLK	Phosphate carrier protein, mitochondrial OS=Homo sapiens GN=SLC25A3 PE=1 SV=2	Q00325	206	0.0915659	0.0604082	0.0981908	0.120444	0.0602353	0.110378	0.140449	0.0280567	0.0268223	MPCP	MPCP_M[+16]207	207	SLC25A3	T3	OUT
sp|Q07065|CKAP4_HUMAN	LQHVEDGVLSM[+16]QVASAR	Cytoskeleton-associated protein 4 OS=Homo sapiens GN=CKAP4 PE=1 SV=2	Q07065	412	0.664887	0.404959	0.562057	0.552022	0.727321	0.07392	0.414487	0.550405	0.504102	CKAP4	CKAP4_M[+16]423	423	CKAP4	T3	L2
sp|Q14126|DSG2_HUMAN	F[+16]LDDLGLK	Desmoglein-2 OS=Homo sapiens GN=DSG2 PE=1 SV=2	Q14126	824	0.448283	0.466943	0.408188	0.449864	0.33053	0.459079	0.437153	0.375943	0.49691	DSG2	DSG2_F[+16]825	825	DSG2	T3	OUT
sp|Q14697|GANAB_HUMAN	LYNLDVF[+16]QYELYNPMALYGSVPVLLAHNPHR	Neutral alpha-glucosidase AB OS=Homo sapiens GN=GANAB PE=1 SV=3	Q14697	278	0.042171	0.0546014	0.0103194	0.0123287	0.0738496	0.052523	0.0426429	0.0100163	0.0473545	GANAB	GANAB_F[+16]285	285	GANAB	T3	L2
sp|Q14697|GANAB_HUMAN	SGGM[+16]ERPFVLAR	Neutral alpha-glucosidase AB OS=Homo sapiens GN=GANAB PE=1 SV=3	Q14697	590	0.187033	0.0916228	0.0388581	0.110066	0.125459	0.0614079	0.0810245	0.0535855	0.0444163	GANAB	GANAB_M[+16]594	594	GANAB	T3	L2
sp|Q15363|TMED2_HUMAN	HEQEYM[+16]EVR	Transmembrane emp24 domain-containing protein 2 OS=Homo sapiens GN=TMED2 PE=1 SV=1	Q15363	145	0.0108119	0.0688159	0.000868659	0.00166889	0.0182775	0.0106577	0.0180318	0.00237992	0.0390114	TMED2	TMED2_M[+16]151	151	TMED2	T3	OUT
sp|Q15363|TMED2_HUMAN	IVM[+16]FTIDIGEAPK	Transmembrane emp24 domain-containing protein 2 OS=Homo sapiens GN=TMED2 PE=1 SV=1	Q15363	104	0.862122	0.078621	0.0688002	0.0842066	0.112902	0.0726494	0.074172	0.0168009	0.0167755	TMED2	TMED2_M[+16]107	107	TMED2	T3	OUT
sp|Q7KZF4|SND1_HUMAN	LRPLYDIPYM[+16]FEAR	Staphylococcal nuclease domain-containing protein 1 OS=Homo sapiens GN=SND1 PE=1 SV=1	Q7KZF4	389	0.0234236	0.0147255	0.0185575	0.0186466	0.023263	0.00170343	0.0212606	0.0233863	0.019453	SND1	SND1_M[+16]399	399	SND1	T3	L2
sp|Q7KZF4|SND1_HUMAN	ALLLPDYYLVTVM[+16]LSGIK	Staphylococcal nuclease domain-containing protein 1 OS=Homo sapiens GN=SND1 PE=1 SV=1	Q7KZF4	209	0.0261278	0.0135368	0.0102247	0.0113498	0.0202146	0.0219147	0.00587806	0.00935262	0.00879217	SND1	SND1_M[+16]222	222	SND1	T3	L2
sp|Q7KZF4|SND1_HUMAN	AGNFIGW[+32]LHIDGANLSVLLVEHALSK	Staphylococcal nuclease domain-containing protein 1 OS=Homo sapiens GN=SND1 PE=1 SV=1	Q7KZF4	603	0.156583	0.0159349	0.0132284	0.00749317	0.0821907	0.075619	0.030021	0.0101113	0.012299	SND1	SND1_W[+32]610	610	SND1	T3	L2
sp|Q93084|AT2A3_HUMAN	NM[+16]LFSGTNITSGK	Sarcoplasmic/endoplasmic reticulum calcium ATPase 3 OS=Homo sapiens GN=ATP2A3 PE=1 SV=2	Q93084	205	0.16659	0.0509694	0.0404228	0.386364	0.108162	0.073594	0.0452417	0.0521397	0.0540254	AT2A3	AT2A3_M[+16]207	207	ATP2A3	T3	L2
sp|Q99623|PHB2_HUMAN	DLQM[+16]VNISLR	Prohibitin-2 OS=Homo sapiens GN=PHB2 PE=1 SV=2	Q99623	97	0.168868	0.28165	0.0505658	0.0913887	0.15413	0.1972	0.0627282	0.0612801	0.375968	PHB2	PHB2_M[+16]101	101	PHB2	T3	L2
sp|Q99623|PHB2_HUMAN	VLSRPNAQELPSM[+16]YQR	Prohibitin-2 OS=Homo sapiens GN=PHB2 PE=1 SV=2	Q99623	107	0.093485	0.042372	0.032236	0.0548148	0.0949888	0.0444283	0.02305	0.0330388	0.0312215	PHB2	PHB2_M[+16]120	120	PHB2	T3	L2
sp|Q99623|PHB2_HUMAN	VLSRPNAQELPSMY[+16]QR	Prohibitin-2 OS=Homo sapiens GN=PHB2 PE=1 SV=2	Q99623	107	0.0830505	0.0405596	0.032236	0.0521819	0.0676587	0.0351433	0.02305	0.0330388	0.0297961	PHB2	PHB2_Y[+16]121	121	PHB2	T3	L2
sp|Q9BQG0|MBB1A_HUMAN	AM[+16]LRPALFANLFGVLALFQSGR	Myb-binding protein 1A OS=Homo sapiens GN=MYBBP1A PE=1 SV=2	Q9BQG0	126	0.336779	0.369435	0.334238	0.396023	0.38673	0.466772	0.336566	0.33074	0.355351	MBB1A	MBB1A_M[+16]128	128	MYBBP1A	T3	OUT
sp|Q9H3H5|GPT_HUMAN	MW[+16]AFSELPMPLLINLIVSLLGFVATVTLIPAFR	UDP-N-acetylglucosamine--dolichyl-phosphate N-acetylglucosaminephosphotransferase OS=Homo sapiens GN=DPAGT1 PE=1 SV=2	Q9H3H5	0	0.92565	0.730377	0.544367	0.604953	0.682334	0.724996	0.558157	0.612089	0.685097	GPT	GPT_W[+16]2	2	DPAGT1	T3	OUT
sp|Q9NS69|TOM22_HUMAN	LQM[+16]EQQQQLQQR	Mitochondrial import receptor subunit TOM22 homolog OS=Homo sapiens GN=TOMM22 PE=1 SV=3	Q9NS69	105	0.0230993	0.00389103	0.00503499	0.0082503	0.0351147	0.0171879	0.00112304	0.00485325	0.00379839	TOM22	TOM22_M[+16]108	108	TOMM22	T3	L1
sp|Q9Y5M8|SRPRB_HUMAN	DVAEFLYQVLIDSM[+16]GLK	Signal recognition particle receptor subunit beta OS=Homo sapiens GN=SRPRB PE=1 SV=3	Q9Y5M8	153	0.192721	0.231403	0.233408	0.0718124	0.530003	0.460297	0.134937	0.199777	0.146493	SRPRB	SRPRB_M[+16]167	167	SRPRB	T3	L1
sp|A1L0T0|ILVBL_HUMAN	NAQM[+16]AQSPILLLGGAASTLLQNR	Acetolactate synthase-like protein OS=Homo sapiens GN=ILVBL PE=1 SV=2	A1L0T0	134	0.167545	0.135891	0.170078	0.210143	0.128393	0.107925	0.113396	0.162046	0.16256	ILVBL	ILVBL_M[+16]138	138	ILVBL	T4	OUT
sp|A1L0T0|ILVBL_HUMAN	AAM[+16]PVAQHLNPVQVLQLVEETLPDNSILVVDGGDFVGTAAHLVQPR	Acetolactate synthase-like protein OS=Homo sapiens GN=ILVBL PE=1 SV=2	A1L0T0	436	0.171774	0.0406785	0.0299284	0.0563316	0.152637	0.0619702	0.0302241	0.0355176	0.0410007	ILVBL	ILVBL_M[+16]439	439	ILVBL	T4	OUT
sp|O75438|NDUB1_HUMAN	DHWVHVLVP[+16]MGFVIGCYLDR	NADH dehydrogenase [ubiquinone] 1 beta subcomplex subunit 1 OS=Homo sapiens GN=NDUFB1 PE=1 SV=1	O75438	9	0.139387	0.0357912	0.0130204	0.262344	0.108411	0.107713	0.0490653	0.00850994	0.210123	NDUB1	NDUB1_P[+16]18	18	NDUFB1	T4	OUT
sp|O96008|TOM40_HUMAN	RPGEEGTVM[+16]SLAGK	Mitochondrial import receptor subunit TOM40 homolog OS=Homo sapiens GN=TOMM40 PE=1 SV=1	O96008	239	0.15279	0.0758793	0.0714735	0.0966345	0.158623	0.118935	0.0437264	0.0997098	0.0665754	TOM40	TOM40_M[+16]248	248	TOMM40	T4	L1
sp|P07099|HYEP_HUMAN	MW[+16]LEILLTSVLGFAIYWFISR	Epoxide hydrolase 1 OS=Homo sapiens GN=EPHX1 PE=1 SV=1	P07099	0	0.529042	0.734367	0.625959	0.942238	0	0.610875	0.570328	0.659549	0.715601	HYEP	HYEP_W[+16]2	2	EPHX1	T4	OUT
sp|P07099|HYEP_HUMAN	M[+16]WLEILLTSVLGFAIYWFISRDKEETLPLEDGWWGPGTR	Epoxide hydrolase 1 OS=Homo sapiens GN=EPHX1 PE=1 SV=1	P07099	0	0.505321	0.789582	0.995595	0.956878	0.263764	0.000597377	0.993507	0.999223	0.826622	HYEP	HYEP_M[+16]1	1	EPHX1	T4	OUT
sp|P07099|HYEP_HUMAN	KFSLDDLLTNVM[+16]LYWTTGTIISSQR	Epoxide hydrolase 1 OS=Homo sapiens GN=EPHX1 PE=1 SV=1	P07099	347	0.0884124	0.0983872	0.0705821	0.0967978	0.106086	0.142983	0.0680248	0.0771306	0.0901963	HYEP	HYEP_M[+16]359	359	EPHX1	T4	OUT
sp|P07099|HYEP_HUMAN	F[+16]SLDDLLTNVMLYWTTGTIISSQR	Epoxide hydrolase 1 OS=Homo sapiens GN=EPHX1 PE=1 SV=1	P07099	348	0.0910026	0.0567769	0.0399078	0.0982256	0.989776	0.999111	0.0583261	0.0433223	0.0711725	HYEP	HYEP_F[+16]349	349	EPHX1	T4	OUT
sp|P12532|KCRU_HUMAN	TVGM[+16]VAGDEETYEVFADLFDPVIQER	Creatine kinase U-type, mitochondrial OS=Homo sapiens GN=CKMT1A PE=1 SV=1	P12532	103	0.142362	0.0620751	0.0967617	0.125598	0.12631	0.0912582	0.0403127	0.0561993	0.058482	KCRU	KCRU_M[+16]107	107	CKMT1B	T4	L2
sp|P12532|KCRU_HUMAN	LSEMTEAEQQQLIDDHFLFDK[+16]PVSPLLTAAGMAR	Creatine kinase U-type, mitochondrial OS=Homo sapiens GN=CKMT1A PE=1 SV=1	P12532	208	0.09585	0.0130407	0.014077	0.034546	0.107755	0.0323242	0.0127075	0.0259388	0.0271368	KCRU	KCRU_K[+16]229	229	CKMT1B	T4	L2
sp|P12532|KCRU_HUMAN	LSEMTEAEQQQLIDDHFLFDKPVSPLLTAAGM[+16]AR	Creatine kinase U-type, mitochondrial OS=Homo sapiens GN=CKMT1A PE=1 SV=1	P12532	208	0.113541	0.0311608	0.0192073	0.0419077	0.0657684	0.0498633	0.0153445	0.0229167	0.0289625	KCRU	KCRU_M[+16]240	240	CKMT1B	T4	L2
sp|Q00765|REEP5_HUMAN	HESQM[+16]DSVVK	Receptor expression-enhancing protein 5 OS=Homo sapiens GN=REEP5 PE=1 SV=3	Q00765	147	0.0797078	0.023233	0.0839827	0.0813949	0.063767	0.000282356	0.0606464	0.0569017	0.111941	REEP5	REEP5_M[+16]152	152	REEP5	T4	OUT
sp|Q00765|REEP5_HUMAN	NCM[+16]TDLLAK	Receptor expression-enhancing protein 5 OS=Homo sapiens GN=REEP5 PE=1 SV=3	Q00765	16	0.0534096	0.221671	0.0707914	0.0921024	0.0780407	0.19057	0.0750402	0.15903	0.227049	REEP5	REEP5_M[+16]19	19	REEP5	T4	OUT
sp|Q15041|AR6P1_HUMAN	STNLLAAETASLEEQLQGWGEVMLMADK[+16]	ADP-ribosylation factor-like protein 6-interacting protein 1 OS=Homo sapiens GN=ARL6IP1 PE=1 SV=2	Q15041	7	0.107622	0.0741969	0.0574921	0.138768	0.0845998	0.089008	0.0470891	0.0723242	0.140524	AR6P1	AR6P1_K[+16]35	35	ARL6IP1	T4	OUT
sp|Q6NUQ4|TM214_HUMAN	VLAF[+32]GAKPDSTLHTYFPSFLSR	Transmembrane protein 214 OS=Homo sapiens GN=TMEM214 PE=1 SV=2	Q6NUQ4	350	0.416057	0.154764	0.452685	0.304111	0.286017	0.305049	0.337677	0.475015	0.468131	TM214	TM214_F[+32]354	354	TMEM214	T4	OUT
sp|Q8N2K0|ABD12_HUMAN	GM[+16]TYDALHVFDWIK	Monoacylglycerol lipase ABHD12 OS=Homo sapiens GN=ABHD12 PE=1 SV=2	Q8N2K0	218	0.166313	0.0361101	0.00560357	0.0544693	0.140691	0.00749355	0.0277999	0.034454	0.029607	ABD12	ABD12_M[+16]220	220	ABHD12	T4	L2
sp|Q8TCT9|HM13_HUMAN	GEVTEMF[+16]SYEESNPKDPAAVTESK	Minor histocompatibility antigen H13 OS=Homo sapiens GN=HM13 PE=1 SV=1	Q8TCT9	337	0.0944664	0.0253896	0.0201729	0.035024	0.0516018	0.0236282	0.0084289	0.0249717	0.0283324	HM13	HM13_F[+16]344	344	HM13	T4	L2
sp|Q8TCT9|HM13_HUMAN	NASDM[+16]PETITSR	Minor histocompatibility antigen H13 OS=Homo sapiens GN=HM13 PE=1 SV=1	Q8TCT9	61	0.0578251	0.0233255	0.0126012	0.0560538	0.0546874	0.00125391	0.0263595	0.0177019	0.0219349	HM13	HM13_M[+16]66	66	HM13	T4	L2
sp|Q92504|S39A7_HUMAN	EASPLQSLLEVLGLLGGVIMM[+16]VLIAHLE	Zinc transporter SLC39A7 OS=Homo sapiens GN=SLC39A7 PE=1 SV=2	Q92504	441	0.859947	0.211354	0.119535	0.162365	0.686703	0.00622801	0.123414	0.135195	0.139258	S39A7	S39A7_M[+16]462	462	SLC39A7	T4	OUT
sp|Q92520|FAM3C_HUMAN	Y[+16]FDMWGGDVAPFIEFLK	Protein FAM3C OS=Homo sapiens GN=FAM3C PE=1 SV=1	Q92520	120	0.0322401	0.0127116	0.0121745	0.0163358	0.0205314	0.0151217	0.0104101	0.0128279	0.0128706	FAM3C	FAM3C_Y[+16]121	121	FAM3C	T4	L2
sp|Q92520|FAM3C_HUMAN	YFDM[+16]WGGDVAPFIEFLK	Protein FAM3C OS=Homo sapiens GN=FAM3C PE=1 SV=1	Q92520	120	0.0322394	0.0127114	0.0121751	0.0162353	0.0206458	0.0151223	0.0104101	0.0128222	0.0128039	FAM3C	FAM3C_M[+16]124	124	FAM3C	T4	L2
sp|Q99805|TM9S2_HUMAN	IYYHVVETGSM[+16]GAR	Transmembrane 9 superfamily member 2 OS=Homo sapiens GN=TM9SF2 PE=1 SV=1	Q99805	215	0.0761665	0.00640318	0.00890755	0.0167692	0.0869226	0.0546493	0.0197953	0.00527997	0.00934892	TM9S2	TM9S2_M[+16]226	226	TM9SF2	T4	L1
sp|Q99805|TM9S2_HUMAN	SM[+16]LLNYQHHWIVDNMPVTWCYDVEDGQR	Transmembrane 9 superfamily member 2 OS=Homo sapiens GN=TM9SF2 PE=1 SV=1	Q99805	144	0.0827256	0.0260785	0.0224783	0.107601	0.0478078	0.0237517	0.0137277	0.0255878	0.0218011	TM9S2	TM9S2_M[+16]146	146	TM9SF2	T4	L1
sp|Q9BW72|HIG2A_HUMAN	IAAQGFTVAAILLGLAVTAM[+16]K	HIG1 domain family member 2A, mitochondrial OS=Homo sapiens GN=HIGD2A PE=1 SV=1	Q9BW72	82	0.254555	0.316698	0.217326	0.277295	0.317563	0.988909	0.222339	0.270494	0.278257	HIG2A	HIG2A_M[+16]102	102	HIGD2A	T4	OUT
sp|Q9H0U4|RAB1B_HUMAN	M[+16]GPGAASGGERPNLK	Ras-related protein Rab-1B OS=Homo sapiens GN=RAB1B PE=1 SV=1	Q9H0U4	172	0.0334899	0.0351952	0.0152421	0.025881	0.0368677	0.0247442	0.0208594	0.0152013	0.0408636	RAB1B	RAB1B_M[+16]173	173	RAB1B	T4	OUT
sp|Q9UJS0|CMC2_HUMAN	WFYIDFGGVKP[+16]MGSEPVPK	Calcium-binding mitochondrial carrier protein Aralar2 OS=Homo sapiens GN=SLC25A13 PE=1 SV=2	Q9UJS0	605	0.138796	0.0071522	0.0665926	0.0688126	0.0864502	0.0662658	0.0453015	0.0534503	0.0683732	CMC2	CMC2_P[+16]616	616	SLC25A13	T4	L2
sp|Q9UJS0|CMC2_HUMAN	FGQVTP[+16]MEVDILFQLADLYEPR	Calcium-binding mitochondrial carrier protein Aralar2 OS=Homo sapiens GN=SLC25A13 PE=1 SV=2	Q9UJS0	260	0.0983851	0	0.00282822	0.00664943	0.0679319	0.0395191	0.000681154	0.0399435	0.0431569	CMC2	CMC2_P[+16]266	266	SLC25A13	T4	L2
sp|Q9UJS0|CMC2_HUMAN	ASFANEDGQVSPGSLLLAGAIAGM[+16]PAASLVTPADVIK	Calcium-binding mitochondrial carrier protein Aralar2 OS=Homo sapiens GN=SLC25A13 PE=1 SV=2	Q9UJS0	508	0.0745118	0.0206522	0.012422	0.0189374	0.0621593	0.0329771	0.0116999	0.0144072	0.0168921	CMC2	CMC2_M[+16]532	532	SLC25A13	T4	L2
sp|Q9Y4P3|TBL2_HUMAN	M[+16]ELSQMSELMGLSVLLGLLALMATAAVAR	Transducin beta-like protein 2 OS=Homo sapiens GN=TBL2 PE=1 SV=1	Q9Y4P3	0	0.670655	0.75957	0.760745	0.551673	0.590437	0.560217	0.641445	0.675684	0.465014	TBL2	TBL2_M[+16]1	1	TBL2	T4	L1

## Sheet: STableIIb
Protein	Protein_Description	Protein_Accession	M1	M2	M3	M4	M5	M6	C1	C3	C2	Gene_name	STRING_type	AAPL_score	AAPL_type
sp|O75131|CPNE3_HUMAN	Copine-3 OS=Homo sapiens GN=CPNE3 PE=1 SV=1	O75131	0.0113602	0.00180811	0.00251622	0.00296846	0.0102861	0.00419867	0.00194399	0.00319136	0.00399151	CPNE3	T2	1.2823	L1
sp|O95471|CLD7_HUMAN	Claudin-7 OS=Homo sapiens GN=CLDN7 PE=1 SV=4	O95471	0.135335	0.138568	0.0917553	0.811188	0	0.230476	0.161139	0.0986853	0.178967	CLDN7	T2	0	OUT
sp|P02786|TFR1_HUMAN	Transferrin receptor protein 1 OS=Homo sapiens GN=TFRC PE=1 SV=2	P02786	0.00808521	0.00222667	0.000868218	0.00131622	0.00643666	0.0035864	0.000881212	0.0010581	0.00102447	TFRC	T2	1.51794	L1
sp|P04406|G3P_HUMAN	Glyceraldehyde-3-phosphate dehydrogenase OS=Homo sapiens GN=GAPDH PE=1 SV=3	P04406	0.0667791	0.0162719	0.0107551	0.0167522	0.0443738	0.032014	0.0102786	0.0160988	0.0121617	GAPDH	T1	4.12301	L1
sp|P04626|ERBB2_HUMAN	Receptor tyrosine-protein kinase erbB-2 OS=Homo sapiens GN=ERBB2 PE=1 SV=1	P04626	0.0275941	0.00810709	0.00808339	0.0127364	0.0213559	0.00911257	0.0101125	0.00863451	0.00871048	ERBB2	Bait	\	Bait
sp|P06748|NPM_HUMAN	Nucleophosmin OS=Homo sapiens GN=NPM1 PE=1 SV=2	P06748	0.01536	0.00918082	0.00415168	0.0123899	0.0167548	0.00975148	0.00212313	0.00237736	0.00494497	NPM1	T2	0	OUT
sp|P11021|GRP78_HUMAN	78 kDa glucose-regulated protein OS=Homo sapiens GN=HSPA5 PE=1 SV=2	P11021	0.000794021	0.00037662	3.10722e-05	0.000355079	0.000214444	0.000313657	0.000170077	0.000296867	0.000343301	HSPA5	T2	-0.30896	OUT
sp|P11142|HSP7C_HUMAN	Heat shock cognate 71 kDa protein OS=Homo sapiens GN=HSPA8 PE=1 SV=1	P11142	0.0193113	0.0233973	0.0265511	0.0262444	0.0247946	0.00315246	0.0234601	0.0291168	0.0218059	HSPA8	T2	0.22045	OUT
sp|P18031|PTN1_HUMAN	Tyrosine-protein phosphatase non-receptor type 1 OS=Homo sapiens GN=PTPN1 PE=1 SV=1	P18031	0.106646	0.0367427	0.011731	0.0144035	0.0578702	0.0804079	0.0110337	0.0103358	0.031644	PTPN1	T2	1.44385	L1
sp|P19367|HXK1_HUMAN	Hexokinase-1 OS=Homo sapiens GN=HK1 PE=1 SV=3	P19367	0.00833077	0.00388082	0.00785522	0.00562326	0.00544067	0.00506738	0.00355077	0.00408389	0.00736877	HK1	T2	-3.35407	OUT
sp|P49327|FAS_HUMAN	Fatty acid synthase OS=Homo sapiens GN=FASN PE=1 SV=3	P49327	0.0126625	0.00414373	0.00487609	0.00827934	0.0168198	0.00992112	0.00522667	0.00439942	0.00416369	FASN	T1	2.22527	L1
sp|P67809|YBOX1_HUMAN	Nuclease-sensitive element-binding protein 1 OS=Homo sapiens GN=YBX1 PE=1 SV=3	P67809	0.0216337	0.00276892	0.00205796	0.00539757	0.00994686	0.00900971	0.00128847	0.00125164	0.00311831	YBX1	T1	0	OUT
sp|Q9HCY8|S10AE_HUMAN	Protein S100-A14 OS=Homo sapiens GN=S100A14 PE=1 SV=1	Q9HCY8	0.0224118	0.00870223	0.00859452	0.00273751	0.0149297	0.00479377	0.00232108	0.00471239	0.00311589	S100A14	T2	2.5893	L1
sp|O15260|SURF4_HUMAN	Surfeit locus protein 4 OS=Homo sapiens GN=SURF4 PE=1 SV=3	O15260	0.130449	0.0970901	0.0696054	0.0887634	0.0953507	0.146262	0.0940954	0.0767286	0.105507	SURF4	T3	-0.243073	OUT
sp|O75396|SC22B_HUMAN	Vesicle-trafficking protein SEC22b OS=Homo sapiens GN=SEC22B PE=1 SV=4	O75396	0.0676947	0.0361819	0.0364406	0.0457014	0.0900177	0.0463318	0.0434816	0.0294162	0.0496689	SEC22B	T3	-0.93743	OUT
sp|O75844|FACE1_HUMAN	CAAX prenyl protease 1 homolog OS=Homo sapiens GN=ZMPSTE24 PE=1 SV=2	O75844	0.12206	0.0740577	0.069825	0.0797485	0.0796814	0.0788992	0.0592343	0.0700127	0.0761635	ZMPSTE24	T3	0.159517	OUT
sp|P00395|COX1_HUMAN	Cytochrome c oxidase subunit 1 OS=Homo sapiens GN=MT-CO1 PE=1 SV=1	P00395	0.151013	0.0848005	0.073987	0.0332017	0.14315	0.0973686	0.0721026	0.0817249	0.0846178	MT-CO1	T3	-3.19383	OUT
sp|P00403|COX2_HUMAN	Cytochrome c oxidase subunit 2 OS=Homo sapiens GN=MT-CO2 PE=1 SV=1	P00403	0.270608	0.171477	0.123154	0.172917	0.192061	0.170048	0.0977907	0.122903	0.167763	MT-CO2	T3	0.408757	OUT
sp|P04075|ALDOA_HUMAN	Fructose-bisphosphate aldolase A OS=Homo sapiens GN=ALDOA PE=1 SV=2	P04075	0.0532552	0.114068	0.00631365	0.0369937	0.0522381	0.0982063	0.010567	0.00573562	0.0152948	ALDOA	T3	1.85885	L1
sp|P04843|RPN1_HUMAN	Dolichyl-diphosphooligosaccharide--protein glycosyltransferase subunit 1 OS=Homo sapiens GN=RPN1 PE=1 SV=1	P04843	0.153381	0.0385257	0.00987198	0.0318425	0.104664	0.000523086	0.00510052	0.00814624	0.00848944	RPN1	T3	6.03757	L1
sp|P04844|RPN2_HUMAN	Dolichyl-diphosphooligosaccharide--protein glycosyltransferase subunit 2 OS=Homo sapiens GN=RPN2 PE=1 SV=3	P04844	0.0754835	0.0409508	0.0132538	0.0385601	0.0398335	0.0230223	0.0246971	0.02018	0.0324648	RPN2	T3	1.37671	L1
sp|P05023|AT1A1_HUMAN	Sodium/potassium-transporting ATPase subunit alpha-1 OS=Homo sapiens GN=ATP1A1 PE=1 SV=1	P05023	0.0231555	0.028685	0.0180138	0.00332866	0.00971304	0.00141004	0.0208214	0.0204625	0.0285184	ATP1A1	T3	-8.09485	OUT
sp|P05141|ADT2_HUMAN	ADP/ATP translocase 2 OS=Homo sapiens GN=SLC25A5 PE=1 SV=7	P05141	0.157866	0.0836126	0.0691044	0.143293	0.116641	0.0861116	0.0630855	0.0866506	0.0839248	SLC25A5	T3	-3.48668	OUT
sp|P07237|PDIA1_HUMAN	Protein disulfide-isomerase OS=Homo sapiens GN=P4HB PE=1 SV=3	P07237	0.231496	0.223046	0.188624	0.179631	0.262243	0.219845	0.198923	0.183096	0.22897	P4HB	T3	-0.50676	OUT
sp|P09110|THIK_HUMAN	3-ketoacyl-CoA thiolase, peroxisomal OS=Homo sapiens GN=ACAA1 PE=1 SV=2	P09110	0.0246786	0.0166635	0.0140917	0.0161985	0.0322603	0.0182527	0.0139057	0.0112676	0.0167518	ACAA1	T3	0.790106	L2
sp|P09758|TACD2_HUMAN	Tumor-associated calcium signal transducer 2 OS=Homo sapiens GN=TACSTD2 PE=1 SV=3	P09758	0.0698908	0.0983825	0.0591446	0.349861	0.0435374	0.0372171	0.114542	0.00979136	0.0780425	TACSTD2	T3	0.119266	OUT
sp|P10809|CH60_HUMAN	60 kDa heat shock protein, mitochondrial OS=Homo sapiens GN=HSPD1 PE=1 SV=2	P10809	0.113544	0.0320143	0.0286056	0.0344775	0.0704283	0.0228914	0.0238027	0.0288649	0.0211843	HSPD1	T3	3.15341	L1
sp|P12236|ADT3_HUMAN	ADP/ATP translocase 3 OS=Homo sapiens GN=SLC25A6 PE=1 SV=4	P12236	0.142905	0.117787	0.114464	0.101434	0.0894622	0.098184	0.0728651	0.109097	0.0891417	SLC25A6	T3	-4.91486	OUT
sp|P13010|XRCC5_HUMAN	X-ray repair cross-complementing protein 5 OS=Homo sapiens GN=XRCC5 PE=1 SV=3	P13010	0.0277082	0.00293461	0.002435	0.00737309	0.0363057	0.107242	0.00161519	0.00263981	0.00189542	XRCC5	T3	15.9266	L1
sp|P13639|EF2_HUMAN	Elongation factor 2 OS=Homo sapiens GN=EEF2 PE=1 SV=4	P13639	0.0439879	0.0112797	0.00803999	0.0250297	0.0289192	0.0206632	0.00720437	0.00951147	0.00725924	EEF2	T3	1.59544	L1
sp|P16435|NCPR_HUMAN	NADPH--cytochrome P450 reductase OS=Homo sapiens GN=POR PE=1 SV=2	P16435	0.390627	0.389591	0.0125461	0.0835364	0.0509996	0.332819	0.0696304	0.369089	0.027559	POR	T3	-4.60169	OUT
sp|P16615|AT2A2_HUMAN	Sarcoplasmic/endoplasmic reticulum calcium ATPase 2 OS=Homo sapiens GN=ATP2A2 PE=1 SV=1	P16615	0.101676	0.0365886	0.0381536	0.0375228	0.0124899	0.0506109	0.02775	0.0284582	0.0422067	ATP2A2	T3	-1.42219	OUT
sp|P20340|RAB6A_HUMAN	Ras-related protein Rab-6A OS=Homo sapiens GN=RAB6A PE=1 SV=3	P20340	0.0814374	0.012744	0.00941201	0.0143252	0.0706814	0.00453529	0.191741	0.00780502	0.0133073	RAB6A	T3	-0.0137851	OUT
sp|P20674|COX5A_HUMAN	Cytochrome c oxidase subunit 5A, mitochondrial OS=Homo sapiens GN=COX5A PE=1 SV=2	P20674	0.0540483	0.00700237	0.00466717	0.00776665	0.0477349	0.0177709	0.00178321	0.00357144	0.0027113	COX5A	T3	10.7509	L1
sp|P21796|VDAC1_HUMAN	Voltage-dependent anion-selective channel protein 1 OS=Homo sapiens GN=VDAC1 PE=1 SV=2	P21796	0.0665047	0.0282097	0.0180067	0.0172584	0.0499665	0.0255312	0.0189427	0.0201103	0.0226402	VDAC1	T3	1.1907	L1
sp|P27824|CALX_HUMAN	Calnexin OS=Homo sapiens GN=CANX PE=1 SV=2	P27824	0.0972212	0.0181745	0.0301273	0.020858	0.0774147	0.0375009	0.0128923	0.0183445	0.0194083	CANX	T3	4.20554	L1
sp|P30101|PDIA3_HUMAN	Protein disulfide-isomerase A3 OS=Homo sapiens GN=PDIA3 PE=1 SV=4	P30101	0.0965618	0.00992472	0.00272518	0.111451	0.0919039	0.0073204	0.000990288	0.102878	0.0106089	PDIA3	T3	0.656216	L2
sp|P31930|QCR1_HUMAN	Cytochrome b-c1 complex subunit 1, mitochondrial OS=Homo sapiens GN=UQCRC1 PE=1 SV=3	P31930	0.292411	0.0615136	0.0420198	0.0699647	0.1905	0.0445179	0.0692247	0.0511028	0.0574353	UQCRC1	T3	0.391565	L2
sp|P39656|OST48_HUMAN	Dolichyl-diphosphooligosaccharide--protein glycosyltransferase 48 kDa subunit OS=Homo sapiens GN=DDOST PE=1 SV=4	P39656	0.200939	0.0428738	0.0696441	0.0812287	0.109692	0.0644179	0.0708931	0.0396248	0.0609056	DDOST	T3	-1.37043	OUT
sp|P40939|ECHA_HUMAN	Trifunctional enzyme subunit alpha, mitochondrial OS=Homo sapiens GN=HADHA PE=1 SV=2	P40939	0.046277	0.0208241	0.0117279	0.0163281	0.0425071	0.0188753	0.00845885	0.0114166	0.0104615	HADHA	T3	3.37653	L1
sp|P49257|LMAN1_HUMAN	Protein ERGIC-53 OS=Homo sapiens GN=LMAN1 PE=1 SV=2	P49257	0.476104	0.427909	0.418523	0.462287	0.44204	0.36818	0.458176	0.423704	0.473076	LMAN1	T3	-1.8929	OUT
sp|P49755|TMEDA_HUMAN	Transmembrane emp24 domain-containing protein 10 OS=Homo sapiens GN=TMED10 PE=1 SV=2	P49755	0.102664	0.0123693	0.00879338	0.0359285	0.0515821	0.023924	0.0123837	0.00670241	0.0234795	TMED10	T3	0.96501	L2
sp|P50416|CPT1A_HUMAN	Carnitine O-palmitoyltransferase 1, liver isoform OS=Homo sapiens GN=CPT1A PE=1 SV=2	P50416	0.0375999	0.0509682	0.0299118	0.0627537	0.089765	0.00698186	0.204234	0.0358311	0.00629428	CPT1A	T3	-0.624693	OUT
sp|P51148|RAB5C_HUMAN	Ras-related protein Rab-5C OS=Homo sapiens GN=RAB5C PE=1 SV=2	P51148	0.164938	0.0664454	0.0383161	0.0968843	0.115789	0.0729927	0.0344082	0.054482	0.0650457	RAB5C	T3	-0.0855428	OUT
sp|P51571|SSRD_HUMAN	Translocon-associated protein subunit delta OS=Homo sapiens GN=SSR4 PE=1 SV=1	P51571	0.159766	0.0699303	0.0170437	0.0862089	0.203781	0.272205	0.0453678	0.0341627	0.0634772	SSR4	T3	0.942388	L2
sp|P51572|BAP31_HUMAN	B-cell receptor-associated protein 31 OS=Homo sapiens GN=BCAP31 PE=1 SV=3	P51572	0.0886742	0.027254	0.0370009	0.0395671	0.0968249	0.0839806	0.00963225	0.0431341	0.0686741	BCAP31	T3	0	OUT
sp|P53007|TXTP_HUMAN	Tricarboxylate transport protein, mitochondrial OS=Homo sapiens GN=SLC25A1 PE=1 SV=2	P53007	0.150141	0.0485495	0.0462452	0.0765018	0.114941	0.0748727	0.046746	0.0483531	0.050578	SLC25A1	T3	-0.131126	OUT
sp|P60468|SC61B_HUMAN	Protein transport protein Sec61 subunit beta OS=Homo sapiens GN=SEC61B PE=1 SV=2	P60468	0.10073	0.0744864	0.0612045	0.0867909	0.119286	0.0388568	0.0686769	0.077437	0.0796307	SEC61B	T3	-0.380437	OUT
sp|P61619|S61A1_HUMAN	Protein transport protein Sec61 subunit alpha isoform 1 OS=Homo sapiens GN=SEC61A1 PE=1 SV=2	P61619	0.20928	0.123908	0.123743	0.101779	0.189595	0.327299	0.107836	0.135114	0.124573	SEC61A1	T3	-2.81896	OUT
sp|P62820|RAB1A_HUMAN	Ras-related protein Rab-1A OS=Homo sapiens GN=RAB1A PE=1 SV=3	P62820	0.0889541	0.0453214	0.0299035	0.0222966	0.0567199	0.00203577	0.0318099	0.0104364	0.0434149	RAB1A	T3	-0.136948	OUT
sp|Q00325|MPCP_HUMAN	Phosphate carrier protein, mitochondrial OS=Homo sapiens GN=SLC25A3 PE=1 SV=2	Q00325	0.0204216	0.0100441	0.0196445	0.0244359	0.0182626	0.0286464	0.0260782	0.00495173	0.00430293	SLC25A3	T3	-1.05607	OUT
sp|Q07065|CKAP4_HUMAN	Cytoskeleton-associated protein 4 OS=Homo sapiens GN=CKAP4 PE=1 SV=2	Q07065	0.433225	0.187662	0.325861	0.286091	0.454593	0.0283015	0.217471	0.318821	0.228361	CKAP4	T3	0.175163	L2
sp|Q14126|DSG2_HUMAN	Desmoglein-2 OS=Homo sapiens GN=DSG2 PE=1 SV=2	Q14126	0.448283	0.466943	0.408188	0.449864	0.33053	0.459079	0.437153	0.375943	0.49691	DSG2	T3	0.166864	OUT
sp|Q14697|GANAB_HUMAN	Neutral alpha-glucosidase AB OS=Homo sapiens GN=GANAB PE=1 SV=3	Q14697	0.0414637	0.0273153	0.0100725	0.0219472	0.0372383	0.0226074	0.0241705	0.0116426	0.0179481	GANAB	T3	0.758075	L2
sp|Q15363|TMED2_HUMAN	Transmembrane emp24 domain-containing protein 2 OS=Homo sapiens GN=TMED2 PE=1 SV=1	Q15363	0.111026	0.0461416	0.0286759	0.0474237	0.0599566	0.0363323	0.0343725	0.00717322	0.0130063	TMED2	T3	-0.0644279	OUT
sp|Q7KZF4|SND1_HUMAN	Staphylococcal nuclease domain-containing protein 1 OS=Homo sapiens GN=SND1 PE=1 SV=1	Q7KZF4	0.0372227	0.0127643	0.0113421	0.00962662	0.0287515	0.0101331	0.0124995	0.0112717	0.0115048	SND1	T3	0.617112	L2
sp|Q93084|AT2A3_HUMAN	Sarcoplasmic/endoplasmic reticulum calcium ATPase 3 OS=Homo sapiens GN=ATP2A3 PE=1 SV=2	Q93084	0.0298674	0.0089787	0.00822357	0.0938207	0.0229724	0.0131314	0.00774959	0.010258	0.00924668	ATP2A3	T3	0.686966	L2
sp|Q99623|PHB2_HUMAN	Prohibitin-2 OS=Homo sapiens GN=PHB2 PE=1 SV=2	Q99623	0.0993324	0.076006	0.0326513	0.0472392	0.0895894	0.0631738	0.0260684	0.0333195	0.089942	PHB2	T3	0.272851	L2
sp|Q9BQG0|MBB1A_HUMAN	Myb-binding protein 1A OS=Homo sapiens GN=MYBBP1A PE=1 SV=2	Q9BQG0	0.16518	0.155005	0.15929	0.14155	0.216692	0.221828	0.140542	0.121585	0.132647	MYBBP1A	T3	-0.613748	OUT
sp|Q9H3H5|GPT_HUMAN	UDP-N-acetylglucosamine--dolichyl-phosphate N-acetylglucosaminephosphotransferase OS=Homo sapiens GN=DPAGT1 PE=1 SV=2	Q9H3H5	0.92565	0.730377	0.544367	0.604953	0.682334	0.724996	0.558157	0.612089	0.685097	DPAGT1	T3	-1.73833	OUT
sp|Q9NS69|TOM22_HUMAN	Mitochondrial import receptor subunit TOM22 homolog OS=Homo sapiens GN=TOMM22 PE=1 SV=3	Q9NS69	0.0230993	0.00389103	0.00503499	0.0082503	0.0351147	0.0171879	0.00112304	0.00485325	0.00379839	TOMM22	T3	1.72895	L1
sp|Q9Y5M8|SRPRB_HUMAN	Signal recognition particle receptor subunit beta OS=Homo sapiens GN=SRPRB PE=1 SV=3	Q9Y5M8	0.192721	0.231403	0.233408	0.0718124	0.530003	0.460297	0.134937	0.199777	0.146493	SRPRB	T3	1.05121	L1
sp|A1L0T0|ILVBL_HUMAN	Acetolactate synthase-like protein OS=Homo sapiens GN=ILVBL PE=1 SV=2	A1L0T0	0.125435	0.0764207	0.0850727	0.129136	0.107583	0.0740535	0.0581816	0.0820952	0.087184	ILVBL	T4	0.0937682	OUT
sp|O75438|NDUB1_HUMAN	NADH dehydrogenase [ubiquinone] 1 beta subcomplex subunit 1 OS=Homo sapiens GN=NDUFB1 PE=1 SV=1	O75438	0.139387	0.0357912	0.0130204	0.262344	0.108411	0.107713	0.0490653	0.00850994	0.210123	NDUFB1	T4	0	OUT
sp|O96008|TOM40_HUMAN	Mitochondrial import receptor subunit TOM40 homolog OS=Homo sapiens GN=TOMM40 PE=1 SV=1	O96008	0.0523617	0.0192164	0.0159351	0.0297516	0.049665	0.024884	0.0103582	0.0242538	0.0156806	TOMM40	T4	1.34883	L1
sp|P07099|HYEP_HUMAN	Epoxide hydrolase 1 OS=Homo sapiens GN=EPHX1 PE=1 SV=1	P07099	0.100779	0.0590133	0.0389152	0.10604	0.0285193	0.0586052	0.048128	0.046956	0.0672594	EPHX1	T4	-4.36686	OUT
sp|P12532|KCRU_HUMAN	Creatine kinase U-type, mitochondrial OS=Homo sapiens GN=CKMT1A PE=1 SV=1	P12532	0.180279	0.052158	0.0580639	0.102361	0.151686	0.086066	0.0328592	0.0517714	0.0571192	CKMT1B	T4	0.305856	L2
sp|Q00765|REEP5_HUMAN	Receptor expression-enhancing protein 5 OS=Homo sapiens GN=REEP5 PE=1 SV=3	Q00765	0.0709784	0.167888	0.0747679	0.0869947	0.0687999	0.117802	0.0700918	0.129482	0.192675	REEP5	T4	-0.884985	OUT
sp|Q15041|AR6P1_HUMAN	ADP-ribosylation factor-like protein 6-interacting protein 1 OS=Homo sapiens GN=ARL6IP1 PE=1 SV=2	Q15041	0.107622	0.0741969	0.0574921	0.138768	0.0845998	0.089008	0.0470891	0.0723242	0.140524	ARL6IP1	T4	0.860966	OUT
sp|Q6NUQ4|TM214_HUMAN	Transmembrane protein 214 OS=Homo sapiens GN=TMEM214 PE=1 SV=2	Q6NUQ4	0.416057	0.154764	0.452685	0.304111	0.286017	0.305049	0.337677	0.475015	0.468131	TMEM214	T4	-0.315043	OUT
sp|Q8N2K0|ABD12_HUMAN	Monoacylglycerol lipase ABHD12 OS=Homo sapiens GN=ABHD12 PE=1 SV=2	Q8N2K0	0.166313	0.0361101	0.00560357	0.0544693	0.140691	0.00749355	0.0277999	0.034454	0.029607	ABHD12	T4	0.691087	L2
sp|Q8TCT9|HM13_HUMAN	Minor histocompatibility antigen H13 OS=Homo sapiens GN=HM13 PE=1 SV=1	Q8TCT9	0.0769834	0.0242729	0.0162095	0.0465325	0.0530498	0.0126189	0.0183154	0.021311	0.0247594	HM13	T4	0.131287	L2
sp|Q92504|S39A7_HUMAN	Zinc transporter SLC39A7 OS=Homo sapiens GN=SLC39A7 PE=1 SV=2	Q92504	0.7689	0.126268	0.0917396	0.102095	0.283858	0.004962	0.086907	0.0959537	0.087283	SLC39A7	T4	0	OUT
sp|Q92520|FAM3C_HUMAN	Protein FAM3C OS=Homo sapiens GN=FAM3C PE=1 SV=1	Q92520	0.0416065	0.0171525	0.0154334	0.0212626	0.0256603	0.0178534	0.0134101	0.0165997	0.0169266	FAM3C	T4	0.572366	L2
sp|Q99805|TM9S2_HUMAN	Transmembrane 9 superfamily member 2 OS=Homo sapiens GN=TM9SF2 PE=1 SV=1	Q99805	0.0526893	0.0115403	0.0116878	0.0150156	0.0412418	0.0189068	0.00971625	0.0123431	0.0107535	TM9SF2	T4	1.23324	L1
sp|Q9BW72|HIG2A_HUMAN	HIG1 domain family member 2A, mitochondrial OS=Homo sapiens GN=HIGD2A PE=1 SV=1	Q9BW72	0.254555	0.316698	0.217326	0.277295	0.317563	0.988909	0.222339	0.270494	0.278257	HIGD2A	T4	0	OUT
sp|Q9H0U4|RAB1B_HUMAN	Ras-related protein Rab-1B OS=Homo sapiens GN=RAB1B PE=1 SV=1	Q9H0U4	0.0253822	0.0248955	0.0110229	0.0180826	0.0292815	0.0177299	0.0148436	0.0107062	0.0285037	RAB1B	T4	-0.10388	OUT
sp|Q9UJS0|CMC2_HUMAN	Calcium-binding mitochondrial carrier protein Aralar2 OS=Homo sapiens GN=SLC25A13 PE=1 SV=2	Q9UJS0	0.0981951	0.0116529	0.024798	0.0270798	0.0709283	0.043719	0.0171743	0.0315108	0.037337	SLC25A13	T4	0.768585	L2
sp|Q9Y4P3|TBL2_HUMAN	Transducin beta-like protein 2 OS=Homo sapiens GN=TBL2 PE=1 SV=1	Q9Y4P3	0.103484	0.107049	0.0856999	0.362471	0.338707	0.286914	0.0670976	0.174148	0.0629689	TBL2	T4	1.71726	L1
