# Supplementary material for: A proximity labeling method for protein–protein interactions on cell membrane
Source: Chem Sci. 2022 Apr 30;13(20):6028–38. doi: 10.1039/d1sc06898a (PMC9132088; doi:10.1039/d1sc06898a)
Supplement: SC-013-D1SC06898A-s004 [file SC-013-D1SC06898A-s004.xlsx]

## Sheet: STableIIIa
Protein	roundoxiseq	Protein_Description	Protein_Accession	Begin_Pos	C2	C1	A1	A2	Kif1	Kif2	SI1	SI2	C3	Gene	Oxidation	OxidationSite	Gene_name	STRING_type	AAPL_type
sp|O60716|CTND1_HUMAN	SYEDM[+32]IGEEVPSDQYYWAPLAQHER	Catenin delta-1 OS=Homo sapiens OX=9606 GN=CTNND1 PE=1 SV=1	O60716	319	0.00594636	0	0.0182857	0.0103817	0.0175838	0.0280873	0.00925447	0.00129263	0.0184512	CTND1	CTND1_M[+32]324	324	CTNND1	T1	OUT
sp|O60716|CTND1_HUMAN	DM[+16]DLTEVITGTLWNLSSHDSIK	Catenin delta-1 OS=Homo sapiens OX=9606 GN=CTNND1 PE=1 SV=1	O60716	464	0.0317957	0.0400746	0.017348	0.0237768	0.0221155	0.0395025	0.0162404	0.0226268	0.0285437	CTND1	CTND1_M[+16]466	466	CTNND1	T1	OUT
sp|O60716|CTND1_HUMAN	DMDLTEVITGTLW[+32]NLSSHDSIK	Catenin delta-1 OS=Homo sapiens OX=9606 GN=CTNND1 PE=1 SV=1	O60716	464	0.00770697	0.0106997	0.00900966	0.00476372	0.0110814	0.01068	0.00215951	0.000853872	0.00904212	CTND1	CTND1_W[+32]477	477	CTNND1	T1	OUT
sp|P04004|VTNC_HUMAN	M[+16]DWLVPATCEPIQSVFFFSGDK	Vitronectin OS=Homo sapiens OX=9606 GN=VTN PE=1 SV=1	P04004	421	0.0193755	0.0105748	0.016278	0.0251006	0.0106553	0.0116615	0.00156369	0.0178952	0.0220875	VTNC	VTNC_M[+16]422	422	VTN	T2	L2
sp|P04406|G3P_HUMAN	VIHDNFGIVEGLM[+16]TTVHAITATQK	Glyceraldehyde-3-phosphate dehydrogenase OS=Homo sapiens OX=9606 GN=GAPDH PE=1 SV=3	P04406	162	0.198428	0.247222	0.220941	0.153559	0.21726	0.215113	0.131388	0.173872	0.236775	G3P	G3P_M[+16]175	175	GAPDH	T2	OUT
sp|P04406|G3P_HUMAN	LISW[+32]YDNEFGYSNR	Glyceraldehyde-3-phosphate dehydrogenase OS=Homo sapiens OX=9606 GN=GAPDH PE=1 SV=3	P04406	309	0.00122508	0.000429889	0.0359735	0.0268101	0.0327616	0.0302257	0.0275504	0.0299234	0.0354707	G3P	G3P_W[+32]313	313	GAPDH	T2	OUT
sp|P15924|DESP_HUMAN	WYVTGPGGVDM[+16]LVPSVGLIIPPPNPLAVDLSCKIEQYYEAILALWNQLYINMK	Desmoplakin OS=Homo sapiens OX=9606 GN=DSP PE=1 SV=3	P15924	492	0.162894	0.160797	0.0294363	0.0515103	0.0549543	0.0265419	0.0428014	0.0435782	0.140869	DESP	DESP_M[+16]503	503	DSP	T1	OUT
sp|P15924|DESP_HUMAN	WYVTGPGGVDMLVPSVGLIIPPPNPLAVDLSCKIEQYYEAILALWNQLYINM[+16]K	Desmoplakin OS=Homo sapiens OX=9606 GN=DSP PE=1 SV=3	P15924	492	0.117691	0.0371859	0.0503564	0.0601748	0.0514853	0.0482847	0.0490917	0.047858	0.135825	DESP	DESP_M[+16]544	544	DSP	T1	OUT
sp|P15924|DESP_HUMAN	ALLQAILQTEDM[+16]LK	Desmoplakin OS=Homo sapiens OX=9606 GN=DSP PE=1 SV=3	P15924	771	0.0351461	0.0380957	0.038446	0.0153977	0.0238181	0.0281338	0.0222002	0.0242301	0.0460287	DESP	DESP_M[+16]783	783	DSP	T1	OUT
sp|P15924|DESP_HUMAN	AVTGYNDPETGNIISLFQAM[+16]NK	Desmoplakin OS=Homo sapiens OX=9606 GN=DSP PE=1 SV=3	P15924	2334	0.015264	0.00446684	0.0441544	0.0310005	0.0228779	0.0376506	0.0150637	0.014836	0.0632154	DESP	DESP_M[+16]2354	2354	DSP	T1	OUT
sp|P16422|EPCAM_HUMAN	KM[+16]DLTVNGEQLDLDPGQTLIYYVDEK	Epithelial cell adhesion molecule OS=Homo sapiens OX=9606 GN=EPCAM PE=1 SV=2	P16422	229	0.0390824	0.0286835	0.099867	0.144418	0.0548969	0.0574819	0.0504709	0.0544204	0.0208973	EPCAM	EPCAM_M[+16]231	231	EPCAM	T2	OUT
sp|P16422|EPCAM_HUMAN	EMGEM[+16]HR	Epithelial cell adhesion molecule OS=Homo sapiens OX=9606 GN=EPCAM PE=1 SV=2	P16422	303	0.00582103	0.00359693	0.0145116	0.0210366	0.00580821	0.00973175	0.00326015	0.00380423	0.00436544	EPCAM	EPCAM_M[+16]308	308	EPCAM	T2	OUT
sp|P18031|PTN1_HUMAN	EETQEDK[+16]DCPIKEEK	Tyrosine-protein phosphatase non-receptor type 1 OS=Homo sapiens OX=9606 GN=PTPN1 PE=1 SV=1	P18031	335	0.0100695	0.0843823	0.0411258	0.046344	0.350009	0.0478594	0.211537	0.296252	0.0313963	PTN1	PTN1_K[+16]342	342	PTPN1	T2	L1
sp|P18031|PTN1_HUMAN	EILHFHYTTWPDF[+16]GVPESPASFLNFLFK	Tyrosine-protein phosphatase non-receptor type 1 OS=Homo sapiens OX=9606 GN=PTPN1 PE=1 SV=1	P18031	169	0.0210714	0.0422773	0.185366	0.105097	0.0402171	0.106823	0.0344127	0.0254235	0.0387021	PTN1	PTN1_F[+16]182	182	PTPN1	T2	L1
sp|P35221|CTNA1_HUMAN	AVMDH[+16]VSDSFLETNVPLLVLIEAAK	Catenin alpha-1 OS=Homo sapiens OX=9606 GN=CTNNA1 PE=1 SV=1	P35221	384	0.0262962	0.0284689	0.0422337	0.0302807	0.0438834	0.0122206	0.0284002	0.015592	0.0262195	CTNA1	CTNA1_H[+16]389	389	CTNNA1	T1	OUT
sp|P35222|CTNB1_HUMAN	TM[+16]QNTNDVETAR	Catenin beta-1 OS=Homo sapiens OX=9606 GN=CTNNB1 PE=1 SV=1	P35222	200	0.000217713	0.00151381	0.000397653	0.0018018	0.00414307	0.016941	0.00203288	0.00173709	0.00862458	CTNB1	CTNB1_M[+16]202	202	CTNNB1	T1	OUT
sp|P35222|CTNB1_HUMAN	M[+16]LGSPVDSVLFYAITTLHNLLLHQEGAK	Catenin beta-1 OS=Homo sapiens OX=9606 GN=CTNNB1 PE=1 SV=1	P35222	242	0.475914	0.324958	0.972561	0.0178952	0.823221	0.0959055	0.0106189	0.259222	0.00698835	CTNB1	CTNB1_M[+16]243	243	CTNNB1	T1	OUT
sp|P46940|IQGA1_HUMAN	QNVAY[+16]EYLCHLEEAK	Ras GTPase-activating-like protein IQGAP1 OS=Homo sapiens OX=9606 GN=IQGAP1 PE=1 SV=1	P46940	36	0.446981	0.821779	0.235243	0.778653	0.425874	0.0927238	0.93932	0.764662	0.773023	IQGA1	IQGA1_Y[+16]41	41	IQGAP1	T2	OUT
sp|P63000|RAC1_HUMAN	KLTPITYPQGLAM[+16]AK	Ras-related C3 botulinum toxin substrate 1 OS=Homo sapiens OX=9606 GN=RAC1 PE=1 SV=1	P63000	132	0.357729	0.380754	0.582512	0.48591	0.552981	0.556712	0.493258	0.52358	0.417358	RAC1	RAC1_M[+16]145	145	RAC1	T2	OUT
sp|Q12864|CAD17_HUMAN	FSGPLKP[+16]MTFSIYEGQEPSQIIFQFK	Cadherin-17 OS=Homo sapiens OX=9606 GN=CDH17 PE=2 SV=3	Q12864	26	0.0083908	0.00611965	0.0242687	0.0360636	0.0155352	0.0100334	0.0217155	0.0169285	0.0214618	CAD17	CAD17_P[+16]33	33	CDH17	Bait	Bait
sp|Q12864|CAD17_HUMAN	W[+32]NDPGAQYSLVDKEK	Cadherin-17 OS=Homo sapiens OX=9606 GN=CDH17 PE=2 SV=3	Q12864	263	0.00135073	0.00179858	0.0103602	0.00669456	0.00545238	0.00608119	0.00154893	0.00257877	0.00524419	CAD17	CAD17_W[+32]264	264	CDH17	Bait	Bait
sp|O43707|ACTN4_HUMAN	HR[+16]PELIEYDKLR	Alpha-actinin-4 OS=Homo sapiens OX=9606 GN=ACTN4 PE=1 SV=2	O43707	204	0.11895	0.011493	0.0064246	0.453992	0.0972447	0.094676	0.238473	0.795656	0.00518675	ACTN4	ACTN4_R[+16]206	206	ACTN4	T3	L1
sp|O43707|ACTN4_HUMAN	AAPFNNW[+16]MESAMEDLQDMFIVHTIEEIEGLISAHDQFK	Alpha-actinin-4 OS=Homo sapiens OX=9606 GN=ACTN4 PE=1 SV=2	O43707	536	0.000493459	0.00105768	0.00252648	0.129987	0.0259922	0.00331571	0.0536709	0.0105959	0.00193325	ACTN4	ACTN4_W[+16]543	543	ACTN4	T3	L1
sp|O43795|MYO1B_HUMAN	NAM[+16]QIVGFMDHEAESVLAVVAAVLK	Unconventional myosin-Ib OS=Homo sapiens OX=9606 GN=MYO1B PE=1 SV=3	O43795	255	0.0219442	0.0140404	0.0164005	0.0656286	0.0245847	0.0106701	0.0186453	0.0552009	0.00273473	MYO1B	MYO1B_M[+16]258	258	MYO1B	T3	L1
sp|O75844|FACE1_HUMAN	DNLGFPVSDWLF[+16]SMWHYSHPPLLER	CAAX prenyl protease 1 homolog OS=Homo sapiens OX=9606 GN=ZMPSTE24 PE=1 SV=2	O75844	440	0.0401065	0.0392298	0.0388308	0.00716231	0.042013	0.00360071	0.0153218	0.00388444	0.0056206	FACE1	FACE1_F[+16]452	452	ZMPSTE24	T3	OUT
sp|O75844|FACE1_HUMAN	DNLGFPVSDWLFSM[+16]WHYSHPPLLER	CAAX prenyl protease 1 homolog OS=Homo sapiens OX=9606 GN=ZMPSTE24 PE=1 SV=2	O75844	440	0.0401065	0.0791304	0.0388359	0.00717928	0.0404607	0.00127684	0.0047626	0.0208862	0.0056206	FACE1	FACE1_M[+16]454	454	ZMPSTE24	T3	OUT
sp|O95994|AGR2_HUMAN	GWGDQLIW[+32]TQTYEEALYK	Anterior gradient protein 2 homolog OS=Homo sapiens OX=9606 GN=AGR2 PE=1 SV=1	O95994	46	0.0562418	0.0412236	0.0337955	0.0434409	0.0363443	0.0726531	0.0322018	0.0456467	0.0647246	AGR2	AGR2_W[+32]54	54	AGR2	T3	OUT
sp|O95994|AGR2_HUMAN	IM[+16]FVDPSLTVR	Anterior gradient protein 2 homolog OS=Homo sapiens OX=9606 GN=AGR2 PE=1 SV=1	O95994	127	0.0535802	0.0302471	0.0376662	0.0396335	0.0395313	0.0456562	0.0516284	0.0430643	0.0533487	AGR2	AGR2_M[+16]129	129	AGR2	T3	OUT
sp|P00338|LDHA_HUMAN	LLIVSNPVDILTYVAW[+32]K	L-lactate dehydrogenase A chain OS=Homo sapiens OX=9606 GN=LDHA PE=1 SV=2	P00338	132	0.054595	0.140779	0.0320334	0.00777235	0.0212013	0.0343712	0.00873858	0.0147822	0.0335368	LDHA	LDHA_W[+32]148	148	LDHA	T3	OUT
sp|P00367|DHE3_HUMAN	DDGSW[+32]EVIEGYR	Glutamate dehydrogenase 1, mitochondrial OS=Homo sapiens OX=9606 GN=GLUD1 PE=1 SV=2	P00367	124	0.0915797	0.0645814	0.0476552	0.00296642	0.0570079	0.05164	0.0368763	0.0503513	0.0623102	DHE3	DHE3_W[+32]129	129	GLUD1	T3	L1
sp|P00367|DHE3_HUMAN	GVFHGIENFINEASY[+16]MSILGMTPGFGDK	Glutamate dehydrogenase 1, mitochondrial OS=Homo sapiens OX=9606 GN=GLUD1 PE=1 SV=2	P00367	274	0.0457909	0.0461509	0.012716	0.036987	0.021038	0.00959046	0.00722295	0.0326789	0.0578772	DHE3	DHE3_Y[+16]289	289	GLUD1	T3	L1
sp|P00367|DHE3_HUMAN	GVFHGIENFINEASYMSILGM[+16]TPGFGDK	Glutamate dehydrogenase 1, mitochondrial OS=Homo sapiens OX=9606 GN=GLUD1 PE=1 SV=2	P00367	274	0.0534463	0.153224	0.7671	0.364344	0.684698	0.662326	0.529803	0.513269	0.0202206	DHE3	DHE3_M[+16]295	295	GLUD1	T3	L1
sp|P00367|DHE3_HUMAN	TFVVQGFGNVGLHSM[+16]R	Glutamate dehydrogenase 1, mitochondrial OS=Homo sapiens OX=9606 GN=GLUD1 PE=1 SV=2	P00367	302	0.0455059	0.0353652	0.0392761	0.024586	0.0313373	0.0238714	0.0136467	0.0459199	0.0546151	DHE3	DHE3_M[+16]317	317	GLUD1	T3	L1
sp|P00395|COX1_HUMAN	YSDYPDAYTTWNILSSVGSFISLTAVMLMIF[+16]MIWEAFASKRK	Cytochrome c oxidase subunit 1 OS=Homo sapiens OX=9606 GN=MT-CO1 PE=1 SV=1	P00395	439	0.0484171	0.224636	0.209933	0.465656	0.195546	0.402835	0.0383736	0.501857	0.241324	COX1	COX1_F[+16]470	470	MT-CO1	T3	OUT
sp|P00395|COX1_HUMAN	YSDYPDAYTTWNILSSVGSFISLTAVMLMIFM[+16]IWEAFASKRK	Cytochrome c oxidase subunit 1 OS=Homo sapiens OX=9606 GN=MT-CO1 PE=1 SV=1	P00395	439	0.0935102	0.327432	0.218238	0.473887	0.195973	0.354619	0.426306	0.335558	0.261151	COX1	COX1_M[+16]471	471	MT-CO1	T3	OUT
sp|P00395|COX1_HUMAN	VLM[+16]VEEPSMNLEWLYGCPPPYHTFEEPVYMK	Cytochrome c oxidase subunit 1 OS=Homo sapiens OX=9606 GN=MT-CO1 PE=1 SV=1	P00395	481	0.10584	0.10186	0.0866293	0.0499984	0.0625447	0.156647	0.24657	0.0661923	0.0486961	COX1	COX1_M[+16]484	484	MT-CO1	T3	OUT
sp|P00395|COX1_HUMAN	VLMVEEP[+16]SMNLEWLYGCPPPYHTFEEPVYMK	Cytochrome c oxidase subunit 1 OS=Homo sapiens OX=9606 GN=MT-CO1 PE=1 SV=1	P00395	481	0.0240176	0.0814761	0.0640726	0.0440418	0.0526846	0.13188	0.0996551	0.0514138	0.0648599	COX1	COX1_P[+16]488	488	MT-CO1	T3	OUT
sp|P00395|COX1_HUMAN	VLMVEEPSMNLEWLYGCPPPYHTF[+16]EEPVYMK	Cytochrome c oxidase subunit 1 OS=Homo sapiens OX=9606 GN=MT-CO1 PE=1 SV=1	P00395	481	0.0185366	0.0139646	0.0419794	0.0208115	0.0441887	0.111285	0.0491	0.00852637	0.0817769	COX1	COX1_F[+16]505	505	MT-CO1	T3	OUT
sp|P00395|COX1_HUMAN	VLMVEEPSMNLEWLYGCPPPYHTFEEPVY[+16]MK	Cytochrome c oxidase subunit 1 OS=Homo sapiens OX=9606 GN=MT-CO1 PE=1 SV=1	P00395	481	0.084031	0.0814511	0.0526778	0.0438196	0.0525792	0.129867	0.0998746	0.0506942	0.0615716	COX1	COX1_Y[+16]510	510	MT-CO1	T3	OUT
sp|P00395|COX1_HUMAN	VLMVEEPSMNLEWLYGCPPPYHTFEEPVYM[+16]K	Cytochrome c oxidase subunit 1 OS=Homo sapiens OX=9606 GN=MT-CO1 PE=1 SV=1	P00395	481	0.106797	0.10266	0.0474831	0.0564896	0.0620633	0.189452	0.247324	0.00686657	0.0742605	COX1	COX1_M[+16]511	511	MT-CO1	T3	OUT
sp|P00403|COX2_HUMAN	ILYM[+16]TDEVNDPSLTIK	Cytochrome c oxidase subunit 2 OS=Homo sapiens OX=9606 GN=MT-CO2 PE=1 SV=1	P00403	82	0.204872	0.176953	0.0720686	0.0235557	0.025383	0.138691	0.0295556	0.0447889	0.032539	COX2	COX2_M[+16]86	86	MT-CO2	T3	OUT
sp|P00403|COX2_HUMAN	M[+16]MITSQDVLHSWAVPTLGLK	Cytochrome c oxidase subunit 2 OS=Homo sapiens OX=9606 GN=MT-CO2 PE=1 SV=1	P00403	151	0.102746	0.064991	0.0397776	0.0366108	0.0559349	0.0555346	0.0482703	0.0644694	0.0843961	COX2	COX2_M[+16]152	152	MT-CO2	T3	OUT
sp|P00403|COX2_HUMAN	MM[+16]ITSQDVLHSWAVPTLGLK	Cytochrome c oxidase subunit 2 OS=Homo sapiens OX=9606 GN=MT-CO2 PE=1 SV=1	P00403	151	0.087949	0.0570032	0.0474491	0.0408366	0.0497536	0.0471991	0.0437137	0.0553446	0.0647377	COX2	COX2_M[+16]153	153	MT-CO2	T3	OUT
sp|P00403|COX2_HUMAN	IFEM[+16]GPVFTL	Cytochrome c oxidase subunit 2 OS=Homo sapiens OX=9606 GN=MT-CO2 PE=1 SV=1	P00403	217	0.0665195	0.0262327	0.0244471	0.0714246	0.0497515	0.0445083	0.0432187	0.0527292	0.0447187	COX2	COX2_M[+16]221	221	MT-CO2	T3	OUT
sp|P02649|APOE_HUMAN	QQTEW[+32]QSGQR	Apolipoprotein E OS=Homo sapiens OX=9606 GN=APOE PE=1 SV=1	P02649	33	0.678946	0.000621714	0.0490508	0.055475	0.0656568	0.0587034	0.0545031	0.0230278	0.0791288	APOE	APOE_W[+32]38	38	APOE	T3	OUT
sp|P02649|APOE_HUMAN	GEVQAM[+16]LGQSTEELR	Apolipoprotein E OS=Homo sapiens OX=9606 GN=APOE PE=1 SV=1	P02649	137	0.0455957	0.0783931	0.0502099	0.020004	0.0693192	0.00441642	0.0847028	0.0244821	0.0660551	APOE	APOE_M[+16]143	143	APOE	T3	OUT
sp|P02786|TFR1_HUMAN	QVDGDNSHVEM[+16]K	Transferrin receptor protein 1 OS=Homo sapiens OX=9606 GN=TFRC PE=1 SV=2	P02786	27	0.000374723	0.00326972	0.00180195	0.00258702	0.00145725	0.00972814	0.001868	0.0105039	0.0156622	TFR1	TFR1_M[+16]38	38	TFRC	T3	OUT
sp|P02786|TFR1_HUMAN	LFGNM[+16]EGDCPSDWK	Transferrin receptor protein 1 OS=Homo sapiens OX=9606 GN=TFRC PE=1 SV=2	P02786	344	0.0355681	0.028665	0.0276123	0.0242537	0.0286718	0.0321534	0.0322151	0.0309357	0.0366166	TFR1	TFR1_M[+16]349	349	TFRC	T3	OUT
sp|P02786|TFR1_HUMAN	EM[+16]GLSLQWLYSAR	Transferrin receptor protein 1 OS=Homo sapiens OX=9606 GN=TFRC PE=1 SV=2	P02786	633	0.518669	0.382866	0.153561	0.291376	0.144402	0.182969	0.36514	0.0504331	0.19665	TFR1	TFR1_M[+16]635	635	TFRC	T3	OUT
sp|P05141|ADT2_HUMAN	KGTDIM[+16]YTGTLDCWR	ADP/ATP translocase 2 OS=Homo sapiens OX=9606 GN=SLC25A5 PE=1 SV=7	P05141	244	0.0421687	0.0317465	0.0294061	0.0287784	0.0259816	0.0383667	0.0241432	0.0212913	0.0525379	ADT2	ADT2_M[+16]250	250	SLC25A5	T3	OUT
sp|P05141|ADT2_HUMAN	KGTDIMY[+32]TGTLDCWR	ADP/ATP translocase 2 OS=Homo sapiens OX=9606 GN=SLC25A5 PE=1 SV=7	P05141	244	0.017354	0.0195115	0.0199043	0.017411	0.0211135	0.019136	0.00082687	0.0195806	0.00268416	ADT2	ADT2_Y[+32]251	251	SLC25A5	T3	OUT
sp|P05141|ADT2_HUMAN	GM[+16]LPDPKNTHIVISWMIAQTVTAVAGLTSYPFDTVR	ADP/ATP translocase 2 OS=Homo sapiens OX=9606 GN=SLC25A5 PE=1 SV=7	P05141	199	0.27505	0.132256	0.0713152	0.304501	0.0369529	0.0456107	0.219315	0.0260356	0.0213734	ADT2	ADT2_M[+16]201	201	SLC25A5	T3	OUT
sp|P07237|PDIA1_HUMAN	YLLVEFYAP[+16]WCGHCK	Protein disulfide-isomerase OS=Homo sapiens OX=9606 GN=P4HB PE=1 SV=3	P07237	42	0.517695	0.390322	0.217999	0.475629	0.453352	0.287343	0.401486	0.452368	0.308458	PDIA1	PDIA1_P[+16]51	51	P4HB	T3	OUT
sp|P07237|PDIA1_HUMAN	KNVFVEFYAP[+16]WCGHCK	Protein disulfide-isomerase OS=Homo sapiens OX=9606 GN=P4HB PE=1 SV=3	P07237	385	0.223604	0.504112	0.19997	0.455626	0.072352	0.102732	0.939402	0.684024	0.271146	PDIA1	PDIA1_P[+16]395	395	P4HB	T3	OUT
sp|P08238|HS90B_HUMAN	LGLGIDEDEVAAEEP[+16]NAAVPDEIPPLEGDEDASR	Heat shock protein HSP 90-beta OS=Homo sapiens OX=9606 GN=HSP90AB1 PE=1 SV=4	P08238	685	0.0136999	0.538392	0.33115	0.00581048	0.295588	0.227208	0.0159329	0.028631	0.525739	HS90B	HS90B_P[+16]700	700	HSP90AB1	T3	OUT
sp|P08574|CY1_HUMAN	ELAAEVEVQDGPNEDGEMF[+16]MRPGK	Cytochrome c1, heme protein, mitochondrial OS=Homo sapiens OX=9606 GN=CYC1 PE=1 SV=3	P08574	146	0.0297343	0.0154817	0.0248131	0.0090964	0.0107167	0.00768346	0.0154547	0.00452834	0.0132037	CY1	CY1_F[+16]165	165	CYC1	T3	L1
sp|P08574|CY1_HUMAN	EGLY[+16]FNPYFPGQAIAMAPPIYTDVLEFDDGTPATMSQIAK	Cytochrome c1, heme protein, mitochondrial OS=Homo sapiens OX=9606 GN=CYC1 PE=1 SV=3	P08574	228	0.0140947	0.0214479	0.00761636	0.00717328	0.00953635	0.00562479	0.00707577	0.00993585	0.00227963	CY1	CY1_Y[+16]232	232	CYC1	T3	L1
sp|P08574|CY1_HUMAN	EGLYFNPYFP[+16]GQAIAMAPPIYTDVLEFDDGTPATMSQIAK	Cytochrome c1, heme protein, mitochondrial OS=Homo sapiens OX=9606 GN=CYC1 PE=1 SV=3	P08574	228	0.0362975	0	0.097271	0.0505366	0.0768504	0.0625105	0.0530681	0.0473906	0.194887	CY1	CY1_P[+16]238	238	CYC1	T3	L1
sp|P08574|CY1_HUMAN	EGLYFNPYFPGQAIAMAPPIYTDVLEFDDGTPATM[+16]SQIAK	Cytochrome c1, heme protein, mitochondrial OS=Homo sapiens OX=9606 GN=CYC1 PE=1 SV=3	P08574	228	0.0268466	0.0388288	0.0451696	0.0317717	0.0371767	0.0487425	0.037855	0.0396343	0.0384373	CY1	CY1_M[+16]263	263	CYC1	T3	L1
sp|P08574|CY1_HUMAN	M[+16]LMMMALLVPLVYTIK	Cytochrome c1, heme protein, mitochondrial OS=Homo sapiens OX=9606 GN=CYC1 PE=1 SV=3	P08574	291	0.525672	0.581564	0.459651	0.717517	0.591131	0.440126	0.456045	0.305207	0.338418	CY1	CY1_M[+16]292	292	CYC1	T3	L1
sp|P08574|CY1_HUMAN	MLM[+16]MMALLVPLVYTIK	Cytochrome c1, heme protein, mitochondrial OS=Homo sapiens OX=9606 GN=CYC1 PE=1 SV=3	P08574	291	0.357146	0.379488	0.524303	0.181613	0.356896	0.488198	0.47893	0.591537	0.634969	CY1	CY1_M[+16]294	294	CYC1	T3	L1
sp|P08962|CD63_HUMAN	VM[+16]SEFNNNFR	CD63 antigen OS=Homo sapiens OX=9606 GN=CD63 PE=1 SV=2	P08962	110	0.246088	0.0251251	0.159574	0.0868095	0.198579	0.10912	0.168009	0.1295	0.205994	CD63	CD63_M[+16]112	112	CD63	T3	OUT
sp|P09525|ANXA4_HUMAN	DLIDDLKSELSGNF[+16]EQVIVGMMTPTVLYDVQELR	Annexin A4 OS=Homo sapiens OX=9606 GN=ANXA4 PE=1 SV=4	P09525	62	0.0120609	0.0101379	0.00268511	0.0132127	0.0473783	0.00807256	0.00944752	0.00870256	0.0186143	ANXA4	ANXA4_F[+16]76	76	ANXA4	T3	OUT
sp|P10515|ODP2_HUMAN	LQPHEFQGGTFTISNLGM[+16]FGIK	Dihydrolipoyllysine-residue acetyltransferase component of pyruvate dehydrogenase complex, mitochondrial OS=Homo sapiens OX=9606 GN=DLAT PE=1 SV=3	P10515	552	0.119102	0.0949777	0.0599511	0.00416532	0.042483	0.0758998	0.00705587	0.00180082	0.0796662	ODP2	ODP2_M[+16]570	570	DLAT	T3	OUT
sp|P10809|CH60_HUMAN	ALM[+16]LQGVDLLADAVAVTMGPK	60 kDa heat shock protein, mitochondrial OS=Homo sapiens OX=9606 GN=HSPD1 PE=1 SV=2	P10809	37	0.0617622	0.0442602	0.0192429	0.0310212	0.00410349	0.0290513	0.0266249	0.028397	0.0252725	CH60	CH60_M[+16]40	40	HSPD1	T3	OUT
sp|P10809|CH60_HUMAN	ALMLQGVDLLADAVAVTM[+16]GPK	60 kDa heat shock protein, mitochondrial OS=Homo sapiens OX=9606 GN=HSPD1 PE=1 SV=2	P10809	37	0.0553234	0.0392071	0.0488342	0.0173343	0.0360229	0.0330147	0.0515923	0.0203913	0.0332525	CH60	CH60_M[+16]55	55	HSPD1	T3	OUT
sp|P10809|CH60_HUMAN	GVM[+16]LAVDAVIAELKK	60 kDa heat shock protein, mitochondrial OS=Homo sapiens OX=9606 GN=HSPD1 PE=1 SV=2	P10809	142	0.0180548	0.0224352	0.00421097	0.017236	0.00580803	0.015442	0.0198495	0.0165064	0.00208631	CH60	CH60_M[+16]145	145	HSPD1	T3	OUT
sp|P10809|CH60_HUMAN	TLNDELEIIEGM[+16]K	60 kDa heat shock protein, mitochondrial OS=Homo sapiens OX=9606 GN=HSPD1 PE=1 SV=2	P10809	205	0.0246221	0.03628	0.00156929	0.015932	0.0444367	0.249177	0.0114419	0.0159965	0.0309311	CH60	CH60_M[+16]217	217	HSPD1	T3	OUT
sp|P10809|CH60_HUMAN	TALLDAAGVASLLTTAEVVVTEIPKEEKDP[+16]GMGAMGGMGGGMGGGMF	60 kDa heat shock protein, mitochondrial OS=Homo sapiens OX=9606 GN=HSPD1 PE=1 SV=2	P10809	526	0.179822	0.152672	0.0475832	0.121416	0.27975	0.184153	0.207658	0.146839	0.230642	CH60	CH60_P[+16]556	556	HSPD1	T3	OUT
sp|P10809|CH60_HUMAN	TALLDAAGVASLLTTAEVVVTEIPKEEKDPGMGAMGGM[+16]GGGMGGGMF	60 kDa heat shock protein, mitochondrial OS=Homo sapiens OX=9606 GN=HSPD1 PE=1 SV=2	P10809	526	0.178118	0.145513	0.349844	0.0743836	0.291859	0.119247	0.213762	0.146373	0.132932	CH60	CH60_M[+16]564	564	HSPD1	T3	OUT
sp|P10809|CH60_HUMAN	TALLDAAGVASLLTTAEVVVTEIPKEEKDPGMGAMGGMGGGM[+16]GGGMF	60 kDa heat shock protein, mitochondrial OS=Homo sapiens OX=9606 GN=HSPD1 PE=1 SV=2	P10809	526	0.186961	0.129894	0.348981	0.211137	0.0954548	0.120218	0.20791	0.146372	0.0969074	CH60	CH60_M[+16]568	568	HSPD1	T3	OUT
sp|P10809|CH60_HUMAN	TALLDAAGVASLLTTAEVVVTEIPKEEKDPGMGAMGGMGGGMGGGM[+16]F	60 kDa heat shock protein, mitochondrial OS=Homo sapiens OX=9606 GN=HSPD1 PE=1 SV=2	P10809	526	0.0543622	0.147946	0.0116909	0.070155	0.0616915	0.027683	0.0417708	0.109492	0.018955	CH60	CH60_M[+16]572	572	HSPD1	T3	OUT
sp|P10809|CH60_HUMAN	TALLDAAGVASLLTTAEVVVTEIPKEEKDPGMGAMGGMGGGMGGGMF[+16]	60 kDa heat shock protein, mitochondrial OS=Homo sapiens OX=9606 GN=HSPD1 PE=1 SV=2	P10809	526	0.0543144	0.136367	0.0116839	0.054849	0.0362494	0.106961	0.043359	0.1215	0.014246	CH60	CH60_F[+16]573	573	HSPD1	T3	OUT
sp|P11021|BIP_HUMAN	DAGTIAGLNVM[+16]R	Endoplasmic reticulum chaperone BiP OS=Homo sapiens OX=9606 GN=HSPA5 PE=1 SV=2	P11021	185	0.051017	0.0123466	0.0129617	0.0268948	0.0191112	0.0193507	0.0270077	0.0408264	0.02662	BIP	BIP_M[+16]196	196	HSPA5	T3	OUT
sp|P11021|BIP_HUMAN	IEW[+32]LESHQDADIEDFK	Endoplasmic reticulum chaperone BiP OS=Homo sapiens OX=9606 GN=HSPA5 PE=1 SV=2	P11021	601	0.0220113	0.054215	0.0015264	0.00284477	0.001635	0.00517871	0.00147664	0.0031045	0.0104814	BIP	BIP_W[+32]604	604	HSPA5	T3	OUT
sp|P11166|GTR1_HUMAN	RNSMLM[+16]MNLLAFVSAVLMGFSK	Solute carrier family 2, facilitated glucose transporter member 1 OS=Homo sapiens OX=9606 GN=SLC2A1 PE=1 SV=2	P11166	92	0.16036	0.0361697	0.299048	0.215758	0.281074	0.326975	0.256846	0.385126	0.28537	GTR1	GTR1_M[+16]98	98	SLC2A1	T3	L1
sp|P11166|GTR1_HUMAN	RNSMLMM[+16]NLLAFVSAVLMGFSK	Solute carrier family 2, facilitated glucose transporter member 1 OS=Homo sapiens OX=9606 GN=SLC2A1 PE=1 SV=2	P11166	92	0.237141	0.296244	0.302168	0.217216	0.273044	0.216558	0.256064	0.375967	0.28958	GTR1	GTR1_M[+16]99	99	SLC2A1	T3	L1
sp|P11166|GTR1_HUMAN	RNSMLMM[+32]NLLAFVSAVLMGFSK	Solute carrier family 2, facilitated glucose transporter member 1 OS=Homo sapiens OX=9606 GN=SLC2A1 PE=1 SV=2	P11166	92	0.0963445	0.507441	0.0637072	0.340084	0.0221331	0.287237	0.180029	0.163725	0.012382	GTR1	GTR1_M[+32]99	99	SLC2A1	T3	L1
sp|P11166|GTR1_HUMAN	RNSMLMMNLLAF[+16]VSAVLMGFSK	Solute carrier family 2, facilitated glucose transporter member 1 OS=Homo sapiens OX=9606 GN=SLC2A1 PE=1 SV=2	P11166	92	0.23928	0.137359	0.30283	0.208707	0.244678	0.0189926	0.231113	0.00722477	0.260627	GTR1	GTR1_F[+16]104	104	SLC2A1	T3	L1
sp|P11166|GTR1_HUMAN	NSM[+16]LMMNLLAFVSAVLMGFSK	Solute carrier family 2, facilitated glucose transporter member 1 OS=Homo sapiens OX=9606 GN=SLC2A1 PE=1 SV=2	P11166	93	0.409892	0.681769	0.218672	0.214492	0.186336	0.205048	0.236276	0.22612	0.218983	GTR1	GTR1_M[+16]96	96	SLC2A1	T3	L1
sp|P11166|GTR1_HUMAN	NSMLMMNLLAF[+32]VSAVLMGFSK	Solute carrier family 2, facilitated glucose transporter member 1 OS=Homo sapiens OX=9606 GN=SLC2A1 PE=1 SV=2	P11166	93	0.028111	0.00962442	0.229047	0.0534545	0.214317	0.211912	0.20862	0.253749	0.233254	GTR1	GTR1_F[+32]104	104	SLC2A1	T3	L1
sp|P11166|GTR1_HUMAN	SFEM[+16]LILGR	Solute carrier family 2, facilitated glucose transporter member 1 OS=Homo sapiens OX=9606 GN=SLC2A1 PE=1 SV=2	P11166	117	0.0775267	0.0890632	0.0566414	0.0526509	0.0751988	0.0734109	0.0542293	0.0633582	0.0946816	GTR1	GTR1_M[+16]121	121	SLC2A1	T3	L1
sp|P11166|GTR1_HUMAN	FIIGVYCGLTTGFVP[+16]MYVGEVSPTALR	Solute carrier family 2, facilitated glucose transporter member 1 OS=Homo sapiens OX=9606 GN=SLC2A1 PE=1 SV=2	P11166	126	0.109945	0.0850635	0.181614	0.0518527	0.238615	0.157949	0.419004	0.0923323	0.0763997	GTR1	GTR1_P[+16]141	141	SLC2A1	T3	L1
sp|P11166|GTR1_HUMAN	FIIGVYCGLTTGFVPM[+16]YVGEVSPTALR	Solute carrier family 2, facilitated glucose transporter member 1 OS=Homo sapiens OX=9606 GN=SLC2A1 PE=1 SV=2	P11166	126	0.110716	0.281013	0.184696	0.0480594	0.13779	0.0735447	0.358244	0.12102	0.0794241	GTR1	GTR1_M[+16]142	142	SLC2A1	T3	L1
sp|P11166|GTR1_HUMAN	GTADVTHDLQEM[+16]K	Solute carrier family 2, facilitated glucose transporter member 1 OS=Homo sapiens OX=9606 GN=SLC2A1 PE=1 SV=2	P11166	232	0.00578879	0.00867471	0.0026252	0.00528083	0.00484579	0.00860672	0.0072652	0.00328579	0.00725435	GTR1	GTR1_M[+16]244	244	SLC2A1	T3	L1
sp|P11166|GTR1_HUMAN	GTADVTHDLQEMK[+16]EESR	Solute carrier family 2, facilitated glucose transporter member 1 OS=Homo sapiens OX=9606 GN=SLC2A1 PE=1 SV=2	P11166	232	0.0154889	0.0138156	0.00928919	0.00926706	0.012116	0.0123078	0.00917164	0.0128029	0.0121677	GTR1	GTR1_K[+16]245	245	SLC2A1	T3	L1
sp|P11169|GTR3_HUMAN	R[+16]NSMLIVNLLAVTGGCFMGLCK	Solute carrier family 2, facilitated glucose transporter member 3 OS=Homo sapiens OX=9606 GN=SLC2A3 PE=1 SV=1	P11169	90	0.590552	0.65838	0.569941	0.124775	0.0899266	0.117288	0.104341	0.162209	0.147815	GTR3	GTR3_R[+16]91	91	SLC2A3	T3	OUT
sp|P11169|GTR3_HUMAN	RNSM[+16]LIVNLLAVTGGCFMGLCK	Solute carrier family 2, facilitated glucose transporter member 3 OS=Homo sapiens OX=9606 GN=SLC2A3 PE=1 SV=1	P11169	90	0.0772238	0.0659461	0.0568686	0.146712	0.079263	0.12745	0.114629	0.127745	0.135158	GTR3	GTR3_M[+16]94	94	SLC2A3	T3	OUT
sp|P11169|GTR3_HUMAN	RNSMLIVNLLAVTGGCFM[+16]GLCK	Solute carrier family 2, facilitated glucose transporter member 3 OS=Homo sapiens OX=9606 GN=SLC2A3 PE=1 SV=1	P11169	90	0.0747777	0.0663947	0.044066	0.137548	0.0806209	0.0832287	0.111966	0.0545732	0.125979	GTR3	GTR3_M[+16]108	108	SLC2A3	T3	OUT
sp|P11169|GTR3_HUMAN	SVEM[+16]LILGR	Solute carrier family 2, facilitated glucose transporter member 3 OS=Homo sapiens OX=9606 GN=SLC2A3 PE=1 SV=1	P11169	115	0.0555651	0.0596571	0.0479907	0.0472696	0.043575	0.0531723	0.0388544	0.0448289	0.0577921	GTR3	GTR3_M[+16]119	119	SLC2A3	T3	OUT
sp|P11169|GTR3_HUMAN	LVIGLFCGLCTGFVP[+16]MYIGEISPTALR	Solute carrier family 2, facilitated glucose transporter member 3 OS=Homo sapiens OX=9606 GN=SLC2A3 PE=1 SV=1	P11169	124	0.303039	0.219812	0.181639	0.130526	0.154245	0.148968	0.11963	0.12993	0.15486	GTR3	GTR3_P[+16]139	139	SLC2A3	T3	OUT
sp|P11169|GTR3_HUMAN	LVIGLFCGLCTGFVPM[+16]YIGEISPTALR	Solute carrier family 2, facilitated glucose transporter member 3 OS=Homo sapiens OX=9606 GN=SLC2A3 PE=1 SV=1	P11169	124	0.29658	0.219774	0.159434	0.126823	0.15015	0.151656	0.119261	0.149599	0.156041	GTR3	GTR3_M[+16]140	140	SLC2A3	T3	OUT
sp|P11169|GTR3_HUMAN	LW[+32]GTQDVSQDIQEMK	Solute carrier family 2, facilitated glucose transporter member 3 OS=Homo sapiens OX=9606 GN=SLC2A3 PE=1 SV=1	P11169	228	0.0130434	0.0105823	0.0135752	0.0061068	0.0148988	0.015003	0.00612061	0.0074987	0.0158411	GTR3	GTR3_W[+32]230	230	SLC2A3	T3	OUT
sp|P11169|GTR3_HUMAN	LWGTQDVSQDIQEM[+16]K	Solute carrier family 2, facilitated glucose transporter member 3 OS=Homo sapiens OX=9606 GN=SLC2A3 PE=1 SV=1	P11169	228	0.0283155	0.0208026	0.0368996	0.0219445	0.0166977	0.0178885	0.025222	0.0269509	0.0297763	GTR3	GTR3_M[+16]242	242	SLC2A3	T3	OUT
sp|P11169|GTR3_HUMAN	LW[+16]GTQDVSQDIQEMKDESAR	Solute carrier family 2, facilitated glucose transporter member 3 OS=Homo sapiens OX=9606 GN=SLC2A3 PE=1 SV=1	P11169	228	0.00663323	0.00073745	0.00258217	0.000916761	0.00423762	0.000982344	0.000331182	0.00095467	0.00639987	GTR3	GTR3_W[+16]230	230	SLC2A3	T3	OUT
sp|P11169|GTR3_HUMAN	TLHMIGLGGM[+16]AFCSTLMTVSLLLK	Solute carrier family 2, facilitated glucose transporter member 3 OS=Homo sapiens OX=9606 GN=SLC2A3 PE=1 SV=1	P11169	332	0.41481	0.622909	0.446421	0.278093	0.164365	0.27197	0.195878	0.199981	0.415552	GTR3	GTR3_M[+16]342	342	SLC2A3	T3	OUT
sp|P11169|GTR3_HUMAN	TLHMIGLGGMAFCSTLM[+16]TVSLLLK	Solute carrier family 2, facilitated glucose transporter member 3 OS=Homo sapiens OX=9606 GN=SLC2A3 PE=1 SV=1	P11169	332	0.515887	0.146946	0.459067	0.360117	0.333319	0.509799	0.548959	0.474826	0.419856	GTR3	GTR3_M[+16]349	349	SLC2A3	T3	OUT
sp|P11169|GTR3_HUMAN	SGKDGVMEM[+16]NSIEPAK	Solute carrier family 2, facilitated glucose transporter member 3 OS=Homo sapiens OX=9606 GN=SLC2A3 PE=1 SV=1	P11169	474	0.0181179	0.0141623	0.00487404	0.00381778	0.0056749	0.00191	0.00401997	0.00163052	0.00513928	GTR3	GTR3_M[+16]483	483	SLC2A3	T3	OUT
sp|P11169|GTR3_HUMAN	SGKDGVM[+16]EMNSIEPAKETTTNV	Solute carrier family 2, facilitated glucose transporter member 3 OS=Homo sapiens OX=9606 GN=SLC2A3 PE=1 SV=1	P11169	474	0.01199	0.0153513	0.00956356	0.00495784	0.0142779	0.0167307	0.00961756	0.0107593	0.0121432	GTR3	GTR3_M[+16]481	481	SLC2A3	T3	OUT
sp|P11233|RALA_HUMAN	AEQW[+32]NVNYVETSAK	Ras-related protein Ral-A OS=Homo sapiens OX=9606 GN=RALA PE=1 SV=1	P11233	145	0.0719417	0	0	0.303514	0	0.0715954	0.000187434	0.251554	0.000780882	RALA	RALA_W[+32]149	149	RALA	T3	OUT
sp|P11234|RALB_HUMAN	SKAEEW[+32]GVQYVETSAK	Ras-related protein Ral-B OS=Homo sapiens OX=9606 GN=RALB PE=1 SV=1	P11234	144	0.000753713	0.0204641	0.0142708	0.0200596	0.0164903	0.0146944	0.0092857	0.0135092	0.0117297	RALB	RALB_W[+32]150	150	RALB	T3	OUT
sp|P12236|ADT3_HUMAN	HTQF[+32]WR	ADP/ATP translocase 3 OS=Homo sapiens OX=9606 GN=SLC25A6 PE=1 SV=4	P12236	105	0.00137867	0.000342517	0.049319	0.000646639	0.0518636	0.0217999	0.219933	0.000154956	0.0128831	ADT3	ADT3_F[+32]109	109	SLC25A6	T3	OUT
sp|P12236|ADT3_HUMAN	HTQFW[+32]R	ADP/ATP translocase 3 OS=Homo sapiens OX=9606 GN=SLC25A6 PE=1 SV=4	P12236	105	0.0268005	0.0685911	0.00688904	0.00251463	0.0588494	0.0929778	0.0657645	0.111325	0.123941	ADT3	ADT3_W[+32]110	110	SLC25A6	T3	OUT
sp|P12236|ADT3_HUMAN	GM[+16]LPDPKNTHIVVSWMIAQTVTAVAGVVSYPFDTVR	ADP/ATP translocase 3 OS=Homo sapiens OX=9606 GN=SLC25A6 PE=1 SV=4	P12236	199	0.0337275	0.62646	0.218649	0.0205959	0.00410672	0.140348	0.00963074	0.565198	0.0733761	ADT3	ADT3_M[+16]201	201	SLC25A6	T3	OUT
sp|P12236|ADT3_HUMAN	GM[+16]GGAFVLVLYDELKK	ADP/ATP translocase 3 OS=Homo sapiens OX=9606 GN=SLC25A6 PE=1 SV=4	P12236	280	0.183994	0.101495	0.0614261	0.0923812	0.121363	0.130386	0.0459959	0.0800401	0.0141544	ADT3	ADT3_M[+16]282	282	SLC25A6	T3	OUT
sp|P12277|KCRB_HUMAN	SM[+16]TEAEQQQLIDDHFLFDKPVSPLLLASGMAR	Creatine kinase B-type OS=Homo sapiens OX=9606 GN=CKB PE=1 SV=1	P12277	177	0.0254597	0.0528765	0.0255254	0.0249322	0.0310451	0.0323135	0.0358794	0.0351857	0.0160136	KCRB	KCRB_M[+16]179	179	CKB	T3	OUT
sp|P12277|KCRB_HUMAN	SMTEAEQQQLIDDHFLFDKPVSPLLLASGM[+16]AR	Creatine kinase B-type OS=Homo sapiens OX=9606 GN=CKB PE=1 SV=1	P12277	177	0.0323624	0.033781	0.0231487	0.0195224	0.0242809	0.0314128	0.0327357	0.034388	0.0293971	KCRB	KCRB_M[+16]207	207	CKB	T3	OUT
sp|P12277|KCRB_HUMAN	LGFSEVELVQM[+16]VVDGVK	Creatine kinase B-type OS=Homo sapiens OX=9606 GN=CKB PE=1 SV=1	P12277	341	0.000632969	0.000881117	0.00547254	0.000649324	0.00717046	0.0113689	0.0551746	0.0064512	0.000711198	KCRB	KCRB_M[+16]352	352	CKB	T3	OUT
sp|P13010|XRCC5_HUMAN	HLM[+16]LPDFDLLEDIESK	X-ray repair cross-complementing protein 5 OS=Homo sapiens OX=9606 GN=XRCC5 PE=1 SV=3	P13010	81	0.0350326	0.0483789	0.0275347	0.0216961	0.0289705	0.0423268	0.0346047	0.0405233	0.0058443	XRCC5	XRCC5_M[+16]84	84	XRCC5	T3	OUT
sp|P13073|COX41_HUMAN	FKESF[+16]AEMNR	Cytochrome c oxidase subunit 4 isoform 1, mitochondrial OS=Homo sapiens OX=9606 GN=COX4I1 PE=1 SV=1	P13073	85	0.025734	0.0350348	0.00486214	0.00369101	0.00760386	0.00509667	0.000637581	0.0937484	0.00401479	COX41	COX41_F[+16]90	90	COX4I1	T3	OUT
sp|P13073|COX41_HUMAN	FKESFAEM[+16]NR	Cytochrome c oxidase subunit 4 isoform 1, mitochondrial OS=Homo sapiens OX=9606 GN=COX4I1 PE=1 SV=1	P13073	85	0.0257288	0.0357516	0.00487851	0.00051236	0.000875138	0.00417878	0.000618911	0.0403573	0.00401479	COX41	COX41_M[+16]93	93	COX4I1	T3	OUT
sp|P13667|PDIA4_HUMAN	ENFDEVVNDADIILVEFYAP[+16]WCGHCK	Protein disulfide-isomerase A4 OS=Homo sapiens OX=9606 GN=PDIA4 PE=1 SV=2	P13667	184	0.55521	0.369982	0.281212	0.329933	0.284354	0.328274	0.350118	0.321636	0.332213	PDIA4	PDIA4_P[+16]204	204	PDIA4	T3	OUT
sp|P13667|PDIA4_HUMAN	KDVLIEFYAP[+16]WCGHCK	Protein disulfide-isomerase A4 OS=Homo sapiens OX=9606 GN=PDIA4 PE=1 SV=2	P13667	543	0.373648	0.232511	0.418449	0.395045	0.310013	0.49613	0.459566	0.018478	0.578561	PDIA4	PDIA4_P[+16]553	553	PDIA4	T3	OUT
sp|P13688|CEAM1_HUMAN	EVLLLVHNLPQQLFGY[+32]SWYK	Carcinoembryonic antigen-related cell adhesion molecule 1 OS=Homo sapiens OX=9606 GN=CEACAM1 PE=1 SV=2	P13688	49	0.0319965	0.0343552	0.0481088	0.0569192	0.0278679	0.0289251	0.0259955	0.0232519	0.0238437	CEAM1	CEAM1_Y[+32]65	65	CEACAM1	T3	L1
sp|P13688|CEAM1_HUMAN	EVLLLVHNLPQQLFGYSW[+32]YK	Carcinoembryonic antigen-related cell adhesion molecule 1 OS=Homo sapiens OX=9606 GN=CEACAM1 PE=1 SV=2	P13688	49	0.0346562	0.0284524	0.0715413	0.0849133	0.0278679	0.0292948	0.0256065	0.0269705	0.0237757	CEAM1	CEAM1_W[+32]67	67	CEACAM1	T3	L1
sp|P13688|CEAM1_HUMAN	EDAGTYW[+32]CEVFNPISK	Carcinoembryonic antigen-related cell adhesion molecule 1 OS=Homo sapiens OX=9606 GN=CEACAM1 PE=1 SV=2	P13688	388	0.00659586	0.00455968	0.0435859	0.0433987	0.0271525	0.0312456	0.016337	0.0233266	0.0135322	CEAM1	CEAM1_W[+32]395	395	CEACAM1	T3	L1
sp|P13688|CEAM1_HUMAN	EDAGTYW[+16]CEVFNPISK	Carcinoembryonic antigen-related cell adhesion molecule 1 OS=Homo sapiens OX=9606 GN=CEACAM1 PE=1 SV=2	P13688	388	0.0130921	0.00728051	0.043956	0.0292325	0.0197337	0.00945717	0.0167006	0.0105151	0.0236339	CEAM1	CEAM1_W[+16]395	395	CEACAM1	T3	L1
sp|P14625|ENPL_HUMAN	TVWDWELM[+16]NDIKPIWQRPSK	Endoplasmin OS=Homo sapiens OX=9606 GN=HSP90B1 PE=1 SV=1	P14625	328	0.0140507	0.00387673	0.0348215	0.00233556	0.00107545	0	0.00606119	0.022715	0.0925817	ENPL	ENPL_M[+16]336	336	HSP90B1	T3	OUT
sp|P16435|NCPR_HUMAN	ATTPVIM[+16]VGPGTGVAPFIGFIQER	NADPH--cytochrome P450 reductase OS=Homo sapiens OX=9606 GN=POR PE=1 SV=2	P16435	523	0.0219161	0.018916	0.025258	0.0156332	0.024231	0.00963257	0.0128495	0.00812297	0.0333149	NCPR	NCPR_M[+16]530	530	POR	T3	OUT
sp|P16435|NCPR_HUMAN	DVQNTFYDIVAELGAM[+16]EHAQAVDYIK	NADPH--cytochrome P450 reductase OS=Homo sapiens OX=9606 GN=POR PE=1 SV=2	P16435	637	0.039239	0.0237881	0.0213023	0.0141892	0.0139468	0.0167909	0.0189255	0.0215438	0.0254126	NCPR	NCPR_M[+16]653	653	POR	T3	OUT
sp|P16615|AT2A2_HUMAN	TGTLTTNQM[+16]SVCR	Sarcoplasmic/endoplasmic reticulum calcium ATPase 2 OS=Homo sapiens OX=9606 GN=ATP2A2 PE=1 SV=1	P16615	352	0.0189044	0.0486026	0.329674	0.104001	0.0115332	0.0926934	0.10269	0.084106	0.0196883	AT2A2	AT2A2_M[+16]361	361	ATP2A2	T3	OUT
sp|P16615|AT2A2_HUMAN	SM[+16]SVYCTPNKPSR	Sarcoplasmic/endoplasmic reticulum calcium ATPase 2 OS=Homo sapiens OX=9606 GN=ATP2A2 PE=1 SV=1	P16615	492	0.0144528	0.0106373	0.000219295	0.0184518	0.000351499	0.0152998	0.0158805	0.000257463	0.000526411	AT2A2	AT2A2_M[+16]494	494	ATP2A2	T3	OUT
sp|P16615|AT2A2_HUMAN	NM[+16]LFSGTNIAAGK	Sarcoplasmic/endoplasmic reticulum calcium ATPase 2 OS=Homo sapiens OX=9606 GN=ATP2A2 PE=1 SV=1	P16615	205	0.042813	0.0597158	0.0279777	0.0249836	0.0318117	0.028423	0.0251061	0.0353727	0.0411819	AT2A2	AT2A2_M[+16]207	207	ATP2A2	T3	OUT
sp|P16615|AT2A2_HUMAN	TASEM[+16]VLADDNFSTIVAAVEEGR	Sarcoplasmic/endoplasmic reticulum calcium ATPase 2 OS=Homo sapiens OX=9606 GN=ATP2A2 PE=1 SV=1	P16615	727	0.0600988	0.0412056	0.0428828	0.0207934	0.040847	0.0398196	0.0347768	0.0348533	0.0456997	AT2A2	AT2A2_M[+16]732	732	ATP2A2	T3	OUT
sp|P16615|AT2A2_HUMAN	EW[+32]GSGSDTLR	Sarcoplasmic/endoplasmic reticulum calcium ATPase 2 OS=Homo sapiens OX=9606 GN=ATP2A2 PE=1 SV=1	P16615	549	0.0268766	0.0143075	0.033118	0.0385133	0.0316339	0.0315912	0.0046592	0.00337649	0.0332981	AT2A2	AT2A2_W[+32]551	551	ATP2A2	T3	OUT
sp|P20700|LMNB1_HUMAN	NQNSW[+32]GTGEDVK	Lamin-B1 OS=Homo sapiens OX=9606 GN=LMNB1 PE=1 SV=2	P20700	516	0.0166288	0.00266157	0.0049834	0.0270705	0.0614582	0.0678756	0.0529134	0.0441255	0.0321161	LMNB1	LMNB1_W[+32]521	521	LMNB1	T3	OUT
sp|P20700|LMNB1_HUMAN	LSSEM[+16]NTSTVNSAR	Lamin-B1 OS=Homo sapiens OX=9606 GN=LMNB1 PE=1 SV=2	P20700	276	0.00215646	0.000941284	0.00217933	0.00330543	0.000632206	0.0256784	0.00170744	0.00596239	0.0206382	LMNB1	LMNB1_M[+16]281	281	LMNB1	T3	OUT
sp|P21796|VDAC1_HUMAN	W[+16]TEYGLTFTEK	Voltage-dependent anion-selective channel protein 1 OS=Homo sapiens OX=9606 GN=VDAC1 PE=1 SV=2	P21796	63	0.0109832	0.0148227	0.00815071	0.00861401	0.0102869	0.0132123	0.00709307	0.0111784	0.00979274	VDAC1	VDAC1_W[+16]64	64	VDAC1	T3	OUT
sp|P21796|VDAC1_HUMAN	W[+32]NTDNTLGTEITVEDQLAR	Voltage-dependent anion-selective channel protein 1 OS=Homo sapiens OX=9606 GN=VDAC1 PE=1 SV=2	P21796	74	0.00572396	0.0124294	0.00703184	0.00866076	0.0107504	0.00627705	0.00666249	0.00257009	0.00635808	VDAC1	VDAC1_W[+32]75	75	VDAC1	T3	OUT
sp|P21796|VDAC1_HUMAN	EHINLGCDM[+16]DFDIAGPSIR	Voltage-dependent anion-selective channel protein 1 OS=Homo sapiens OX=9606 GN=VDAC1 PE=1 SV=2	P21796	120	0.832873	0.958882	0.647531	0.364739	0.639095	0.856326	0.894859	0.955702	0.767343	VDAC1	VDAC1_M[+16]129	129	VDAC1	T3	OUT
sp|P21796|VDAC1_HUMAN	W[+32]TEYGLTFTEK	Voltage-dependent anion-selective channel protein 1 OS=Homo sapiens OX=9606 GN=VDAC1 PE=1 SV=2	P21796	63	0.0211279	0.0233903	0.0296447	0.0226748	0.0326872	0.0302653	0.0206366	0.0209433	0.0288829	VDAC1	VDAC1_W[+32]64	64	VDAC1	T3	OUT
sp|P21796|VDAC1_HUMAN	W[+16]NTDNTLGTEITVEDQLAR	Voltage-dependent anion-selective channel protein 1 OS=Homo sapiens OX=9606 GN=VDAC1 PE=1 SV=2	P21796	74	0.0272705	0.0137411	0.0181231	0.000901709	0.0321588	0.0310224	0.0106973	0.000704466	0.0114534	VDAC1	VDAC1_W[+16]75	75	VDAC1	T3	OUT
sp|P21796|VDAC1_HUMAN	GALVLGYEGWLAGY[+16]QMNFETAK	Voltage-dependent anion-selective channel protein 1 OS=Homo sapiens OX=9606 GN=VDAC1 PE=1 SV=2	P21796	139	0.0565873	0.138445	0.0361864	0.00267455	0.00562341	0.0631516	0.0097653	0.0866219	0.0889704	VDAC1	VDAC1_Y[+16]153	153	VDAC1	T3	OUT
sp|P21796|VDAC1_HUMAN	EHINLGCDMDF[+16]DIAGPSIR	Voltage-dependent anion-selective channel protein 1 OS=Homo sapiens OX=9606 GN=VDAC1 PE=1 SV=2	P21796	120	0.00200957	0.000860678	0.00457646	0.00242764	0.00695069	0.0111133	0.0053696	0.0023288	0.00569372	VDAC1	VDAC1_F[+16]131	131	VDAC1	T3	OUT
sp|P27487|DPP4_HUMAN	M[+16]KTPWKVLLGLLGAAALVTIITVPVVLLNK	Dipeptidyl peptidase 4 OS=Homo sapiens OX=9606 GN=DPP4 PE=1 SV=2	P27487	0	0.0735781	0.252658	0.701841	0.0639401	0.355066	0.788057	0.0314435	0.29172	0.340202	DPP4	DPP4_M[+16]1	1	DPP4	T3	OUT
sp|P27487|DPP4_HUMAN	FWYQMILP[+16]PHFDK	Dipeptidyl peptidase 4 OS=Homo sapiens OX=9606 GN=DPP4 PE=1 SV=2	P27487	523	0.00676185	0.00807456	0.0490935	0.00281151	0.00391966	0.0283694	0.00706852	0.00970163	0.0048729	DPP4	DPP4_P[+16]531	531	DPP4	T3	OUT
sp|P27487|DPP4_HUMAN	LNWATY[+32]LASTENIIVASFDGR	Dipeptidyl peptidase 4 OS=Homo sapiens OX=9606 GN=DPP4 PE=1 SV=2	P27487	560	0.0142471	0.0141154	0.0166576	0.0096708	0.0128995	0.0188543	0.00718339	0.0111944	0.0206326	DPP4	DPP4_Y[+32]566	566	DPP4	T3	OUT
sp|P27487|DPP4_HUMAN	MK[+16]TPWKVLLGLLGAAALVTIITVPVVLLNK	Dipeptidyl peptidase 4 OS=Homo sapiens OX=9606 GN=DPP4 PE=1 SV=2	P27487	0	0.375615	0.483506	0.181441	0.89441	0.355132	0.11439	0.822646	0.173121	0.538626	DPP4	DPP4_K[+16]2	2	DPP4	T3	OUT
sp|P27487|DPP4_HUMAN	MLQNVQM[+16]PSK	Dipeptidyl peptidase 4 OS=Homo sapiens OX=9606 GN=DPP4 PE=1 SV=2	P27487	502	0.0526347	0.0743892	0.0273724	0.00239071	0.0128225	0.00609772	0.0318422	0.028802	0.00678555	DPP4	DPP4_M[+16]509	509	DPP4	T3	OUT
sp|P27487|DPP4_HUMAN	QVEY[+16]LLIHGTADDNVHFQQSAQISK	Dipeptidyl peptidase 4 OS=Homo sapiens OX=9606 GN=DPP4 PE=1 SV=2	P27487	696	0.00154246	0.00239405	7.36122e-07	0.00197499	4.13247e-06	0.00960498	0.00575985	0.000110953	0.000144305	DPP4	DPP4_Y[+16]700	700	DPP4	T3	OUT
sp|P27487|DPP4_HUMAN	W[+32]EYYDSVYTER	Dipeptidyl peptidase 4 OS=Homo sapiens OX=9606 GN=DPP4 PE=1 SV=2	P27487	658	0.0224809	0.0254119	0.00999142	0.0190395	0.0216541	0.00436587	0.0163803	0.00854799	0.00867908	DPP4	DPP4_W[+32]659	659	DPP4	T3	OUT
sp|P27487|DPP4_HUMAN	Y[+16]MGLPTPEDNLDHYR	Dipeptidyl peptidase 4 OS=Homo sapiens OX=9606 GN=DPP4 PE=1 SV=2	P27487	669	0.0199164	0.026775	0.00846786	0.00701715	0.0265225	0.0100682	0.011545	0.013756	0.0177641	DPP4	DPP4_Y[+16]670	670	DPP4	T3	OUT
sp|P27797|CALR_HUMAN	EQFLDGDGW[+32]TSR	Calreticulin OS=Homo sapiens OX=9606 GN=CALR PE=1 SV=1	P27797	24	0.0788095	0.0740492	0.0788188	0.0251681	0.0947329	0.092027	0.0419531	0.0493763	0.0752561	CALR	CALR_W[+32]33	33	CALR	T3	OUT
sp|P27797|CALR_HUMAN	GTWIHPEIDNPEYSPDPSIYAYDNF[+32]GVLGLDLWQVK	Calreticulin OS=Homo sapiens OX=9606 GN=CALR PE=1 SV=1	P27797	286	0.00102639	0.000508814	0.0562498	0.0434581	0.0125358	0.0455082	0.0419674	0.0363054	0.0551918	CALR	CALR_F[+32]311	311	CALR	T3	OUT
sp|P27797|CALR_HUMAN	SGTIFDNF[+32]LITNDEAYAEEFGNETWGVTK	Calreticulin OS=Homo sapiens OX=9606 GN=CALR PE=1 SV=1	P27797	322	0.00705806	0.00356069	0.00153328	0.0246213	0.02307	0.0307051	0.0213247	0.028264	0.0313632	CALR	CALR_F[+32]330	330	CALR	T3	OUT
sp|P27797|CALR_HUMAN	SGTIFDNFLITNDEAY[+16]AEEFGNETWGVTK	Calreticulin OS=Homo sapiens OX=9606 GN=CALR PE=1 SV=1	P27797	322	0.0967233	0.0786353	0.117012	0.138284	0.0760139	0.0789816	0.100192	0.0877483	0.208518	CALR	CALR_Y[+16]338	338	CALR	T3	OUT
sp|P27797|CALR_HUMAN	HEQNIDCGGGY[+32]VK	Calreticulin OS=Homo sapiens OX=9606 GN=CALR PE=1 SV=1	P27797	98	0.0188943	0.0310612	0.0404678	0.040115	0.0349814	0.0408997	0.0499379	0.0521442	0.0377728	CALR	CALR_Y[+32]109	109	CALR	T3	OUT
sp|P27797|CALR_HUMAN	GTWIHPEIDNPEY[+32]SPDPSIYAYDNFGVLGLDLWQVK	Calreticulin OS=Homo sapiens OX=9606 GN=CALR PE=1 SV=1	P27797	286	0.0183274	0.0308802	0.0117936	0.0754104	0.0522677	0.0706029	0.0262591	0.0601395	0.0650137	CALR	CALR_Y[+32]299	299	CALR	T3	OUT
sp|P27824|CALX_HUMAN	GTLSGW[+16]ILSK	Calnexin OS=Homo sapiens OX=9606 GN=CANX PE=1 SV=2	P27824	77	0.0623421	0.0706383	0.0555686	0.0485888	0.0494828	0.0455548	0.0500618	0.0461851	0.0455929	CALX	CALX_W[+16]83	83	CANX	T3	OUT
sp|P27824|CALX_HUMAN	THLYTLILNP[+16]DNSFEILVDQSVVNSGNLLNDMTPPVNPSR	Calnexin OS=Homo sapiens OX=9606 GN=CANX PE=1 SV=2	P27824	234	0.0228707	0.0132036	0.0206609	0.0153757	0.00581997	0.0389954	0.0301269	0.00586483	0.0696765	CALX	CALX_P[+16]244	244	CANX	T3	OUT
sp|P27824|CALX_HUMAN	THLYTLILNPDNSF[+16]EILVDQSVVNSGNLLNDMTPPVNPSR	Calnexin OS=Homo sapiens OX=9606 GN=CANX PE=1 SV=2	P27824	234	0.00570982	0.000421745	0.021515	0.0212745	0.0153516	0.0342457	0.00803235	0.0230225	0.077403	CALX	CALX_F[+16]248	248	CANX	T3	OUT
sp|P27824|CALX_HUMAN	GTLSGW[+32]ILSK	Calnexin OS=Homo sapiens OX=9606 GN=CANX PE=1 SV=2	P27824	77	0.0125584	0.0141783	0.011643	0.00391137	0.0103462	0.00685133	0.00872665	0.00810517	0.0100689	CALX	CALX_W[+32]83	83	CANX	T3	OUT
sp|P27824|CALX_HUMAN	TGIY[+32]EEK	Calnexin OS=Homo sapiens OX=9606 GN=CANX PE=1 SV=2	P27824	210	0.0198132	0.0285289	0.0224113	0.021572	0.0212246	0.023666	0.0277695	0.0264566	0.0241815	CALX	CALX_Y[+32]214	214	CANX	T3	OUT
sp|P27824|CALX_HUMAN	W[+32]KPPMIDNPSYQGIWKPR	Calnexin OS=Homo sapiens OX=9606 GN=CANX PE=1 SV=2	P27824	382	0.0339286	0.0378375	0.0494612	0.00133864	0.0346458	0.0159641	0.0413297	0.0139063	0.0357902	CALX	CALX_W[+32]383	383	CANX	T3	OUT
sp|P27824|CALX_HUMAN	WKP[+16]PMIDNPSYQGIWKPR	Calnexin OS=Homo sapiens OX=9606 GN=CANX PE=1 SV=2	P27824	382	0.0333551	0.0255786	0.0347684	0.0416893	0.0417374	0.0352797	0.034835	0.0375781	0.0281677	CALX	CALX_P[+16]385	385	CANX	T3	OUT
sp|P27824|CALX_HUMAN	THLYTLILNPDNSFEILVDQSVVNSGNLLNDM[+16]TPPVNPSR	Calnexin OS=Homo sapiens OX=9606 GN=CANX PE=1 SV=2	P27824	234	0.188749	0.0275456	0.0164334	0.0155796	0.0212379	0.0377682	0.0288151	0.0478639	0.039473	CALX	CALX_M[+16]266	266	CANX	T3	OUT
sp|P27824|CALX_HUMAN	IPDEEATKPEGWLDDEPEY[+32]VPDPDAEKPEDWDEDMDGEWEAPQIANPR	Calnexin OS=Homo sapiens OX=9606 GN=CANX PE=1 SV=2	P27824	311	0.0202602	0.00947215	0.0535456	0.0480078	0.0439872	0.0445628	0.0323011	0.0351774	0.0375612	CALX	CALX_Y[+32]330	330	CANX	T3	OUT
sp|P27824|CALX_HUMAN	WKPPMIDNPSY[+32]QGIWKPR	Calnexin OS=Homo sapiens OX=9606 GN=CANX PE=1 SV=2	P27824	382	0.000935343	0.000194649	0.0231245	0.000416631	0.0272499	0.027359	0.00293332	0.000697872	0.00597165	CALX	CALX_Y[+32]393	393	CANX	T3	OUT
sp|P27824|CALX_HUMAN	IVDDW[+32]ANDGWGLKK	Calnexin OS=Homo sapiens OX=9606 GN=CANX PE=1 SV=2	P27824	445	0.129029	0.0656947	0.0733594	0.0378309	0.127444	0.0701389	0.0239466	0.0373141	0.102356	CALX	CALX_W[+32]450	450	CANX	T3	OUT
sp|P27824|CALX_HUMAN	WKPP[+16]MIDNPSYQGIWKPR	Calnexin OS=Homo sapiens OX=9606 GN=CANX PE=1 SV=2	P27824	382	0.012899	0.0115075	0.0155327	0.00786027	0.00851012	0.00954915	0.00542205	0.0106089	0.0285827	CALX	CALX_P[+16]386	386	CANX	T3	OUT
sp|P27824|CALX_HUMAN	WKPPM[+16]IDNPSYQGIWKPR	Calnexin OS=Homo sapiens OX=9606 GN=CANX PE=1 SV=2	P27824	382	0.0105305	0.0115075	0.0167986	0.00563897	0.00873681	0.00585204	0.0054294	0.0108609	0.034762	CALX	CALX_M[+16]387	387	CANX	T3	OUT
sp|P30101|PDIA3_HUMAN	ISDTGSAGLMLVEFFAP[+16]WCGHCK	Protein disulfide-isomerase A3 OS=Homo sapiens OX=9606 GN=PDIA3 PE=1 SV=4	P30101	38	0.323457	0.219289	0.404313	0.297615	0.155659	0.294742	0.37719	0.274433	0.213388	PDIA3	PDIA3_P[+16]55	55	PDIA3	T3	OUT
sp|P30101|PDIA3_HUMAN	VVVAENFDEIVNNENKDVLIEFYAP[+16]WCGHCK	Protein disulfide-isomerase A3 OS=Homo sapiens OX=9606 GN=PDIA3 PE=1 SV=4	P30101	379	0.498174	0.466395	0.372682	0.537043	0.328407	0.422903	0.469044	0.428233	0.398613	PDIA3	PDIA3_P[+16]404	404	PDIA3	T3	OUT
sp|P30101|PDIA3_HUMAN	M[+16]DATANDVPSPYEVR	Protein disulfide-isomerase A3 OS=Homo sapiens OX=9606 GN=PDIA3 PE=1 SV=4	P30101	433	0.152947	0.00154651	0.00471163	0.00144444	0.00458907	0.131461	0.144039	0.0071097	0.0098469	PDIA3	PDIA3_M[+16]434	434	PDIA3	T3	OUT
sp|P35232|PHB_HUMAN	GVQDIVVGEGTHFLIPW[+32]VQKPIIFDCR	Prohibitin OS=Homo sapiens OX=9606 GN=PHB PE=1 SV=1	P35232	43	4.64486e-05	0.000128091	0.000595694	0.000357699	0.000817316	0.00249674	0.00113713	0.000878485	0.00138024	PHB	PHB_W[+32]60	60	PHB	T3	OUT
sp|P35579|MYH9_HUMAN	EQADF[+16]AIEALAK	Myosin-9 OS=Homo sapiens OX=9606 GN=MYH9 PE=1 SV=4	P35579	407	0.304933	0.401466	0.0115251	0.872114	0.00306369	0.840156	0.0436217	0.0299751	0.0310262	MYH9	MYH9_F[+16]412	412	MYH9	T3	L1
sp|P35613|BASI_HUMAN	VDSDDQWGEYSCVFLPEP[+16]MGTANIQLHGPPR	Basigin OS=Homo sapiens OX=9606 GN=BSG PE=1 SV=2	P35613	191	0.00787047	0.00876984	0.00219345	0.00512739	0.00392281	0.00677173	0.00259219	0.00113296	0.00889812	BASI	BASI_P[+16]209	209	BSG	T3	OUT
sp|P35613|BASI_HUMAN	SELHIENLNM[+16]EADPGQYR	Basigin OS=Homo sapiens OX=9606 GN=BSG PE=1 SV=2	P35613	282	0.0188904	0.014109	0.0109139	0.00856444	0.0168894	0.0182885	0.0137215	0.0148631	0.016807	BASI	BASI_M[+16]292	292	BSG	T3	OUT
sp|P38646|GRP75_HUMAN	ERVEAVNM[+16]AEGIIHDTETK	Stress-70 protein, mitochondrial OS=Homo sapiens OX=9606 GN=HSPA9 PE=1 SV=2	P38646	576	0.00456024	0.00422167	0.0928056	0.000744307	0.0040643	0.00254846	0.168709	0.0997786	0.000645651	GRP75	GRP75_M[+16]584	584	HSPA9	T3	OUT
sp|P38646|GRP75_HUMAN	ER[+16]VEAVNMAEGIIHDTETK	Stress-70 protein, mitochondrial OS=Homo sapiens OX=9606 GN=HSPA9 PE=1 SV=2	P38646	576	0.0712709	0.0414534	0.0759395	0.0889174	0.00888808	0.0824749	0.557278	0.238094	0.0281798	GRP75	GRP75_R[+16]578	578	HSPA9	T3	OUT
sp|P45880|VDAC2_HUMAN	W[+32]CEYGLTFTEK	Voltage-dependent anion-selective channel protein 2 OS=Homo sapiens OX=9606 GN=VDAC2 PE=1 SV=2	P45880	74	0.0308756	0.0258	0.203633	0.0211838	0.0333498	0.0343923	0.0200954	0.0254423	0.0296895	VDAC2	VDAC2_W[+32]75	75	VDAC2	T3	L1
sp|P50402|EMD_HUMAN	TY[+32]GEPESAGPSR	Emerin OS=Homo sapiens OX=9606 GN=EMD PE=1 SV=1	P50402	103	0.0552257	0.00406142	0.0358	0.0323446	0.049908	0.0504437	0.0350891	0.0213425	0.0490043	EMD	EMD_Y[+32]105	105	EMD	T3	OUT
sp|P51149|RAB7A_HUMAN	LVTM[+16]QIWDTAGQER	Ras-related protein Rab-7a OS=Homo sapiens OX=9606 GN=RAB7A PE=1 SV=1	P51149	55	0.0731812	0.0372947	0.0740968	0.0422651	0.0525429	0.0623353	0.055407	0.0441756	0.0179003	RAB7A	RAB7A_M[+16]59	59	RAB7A	T3	OUT
sp|P51572|BAP31_HUMAN	VNLQNNPGAM[+16]EHFHMK	B-cell receptor-associated protein 31 OS=Homo sapiens OX=9606 GN=BCAP31 PE=1 SV=3	P51572	79	0.161914	0.163243	0.0800566	0.0674551	0.0978375	0.0312352	0.0858559	0.0872374	0.0498615	BAP31	BAP31_M[+16]89	89	BCAP31	T3	OUT
sp|P51572|BAP31_HUMAN	AENQVLAM[+16]R	B-cell receptor-associated protein 31 OS=Homo sapiens OX=9606 GN=BCAP31 PE=1 SV=3	P51572	204	0.00951004	0.0169884	0.0145767	0.0132376	0.0223164	0.0202742	0.00926791	0.0129905	0.0178444	BAP31	BAP31_M[+16]212	212	BCAP31	T3	OUT
sp|P51572|BAP31_HUMAN	VNLQNNP[+16]GAMEHFHMK	B-cell receptor-associated protein 31 OS=Homo sapiens OX=9606 GN=BCAP31 PE=1 SV=3	P51572	79	0.000124944	0.000337578	0.0110021	0.00134107	0.0465745	0.0611453	0.000202649	0.0590368	0.0562689	BAP31	BAP31_P[+16]86	86	BCAP31	T3	OUT
sp|P52272|HNRPM_HUMAN	M[+16]GPAMGPALGAGIER	Heterogeneous nuclear ribonucleoprotein M OS=Homo sapiens OX=9606 GN=HNRNPM PE=1 SV=3	P52272	591	0.0157416	0.0592809	0.0804293	0.204814	0.126805	0.0782124	0.0295992	0.0341337	0.0164012	HNRPM	HNRPM_M[+16]592	592	HNRNPM	T3	L1
sp|P62330|ARF6_HUMAN	NWYVQPSCATSGDGLY[+32]EGLTWLTSNYK	ADP-ribosylation factor 6 OS=Homo sapiens OX=9606 GN=ARF6 PE=1 SV=2	P62330	147	0.0566525	0.0485363	0.032796	0.00301197	0.0193053	0.525164	0.00478307	0.302879	0.155425	ARF6	ARF6_Y[+32]163	163	ARF6	T3	OUT
sp|P68104|EF1A1_HUMAN	IGYNPDTVAFVPISGW[+32]NGDNMLEPSANMPWFK	Elongation factor 1-alpha 1 OS=Homo sapiens OX=9606 GN=EEF1A1 PE=1 SV=1	P68104	180	0.0149271	0.0141926	0.0869662	0.0623544	0.000366616	0.0287946	0.0554848	0.00118699	0.198092	EF1A1	EF1A1_W[+32]196	196	EEF1A1	T3	OUT
sp|P68104|EF1A1_HUMAN	IGYNPDTVAFVPISGWNGDNMLEP[+16]SANMPWFK	Elongation factor 1-alpha 1 OS=Homo sapiens OX=9606 GN=EEF1A1 PE=1 SV=1	P68104	180	0.00662771	0.00347626	0.00383576	0.00174768	0.0118495	0.0195549	0.0011342	0.0155052	0.0125347	EF1A1	EF1A1_P[+16]204	204	EEF1A1	T3	OUT
sp|P68104|EF1A1_HUMAN	IGYNPDTVAFVPISGW[+16]NGDNMLEPSANMPWFK	Elongation factor 1-alpha 1 OS=Homo sapiens OX=9606 GN=EEF1A1 PE=1 SV=1	P68104	180	0.48379	0.550352	0.539757	0.586131	0.608692	0.21693	0.0581304	0.607831	0.593687	EF1A1	EF1A1_W[+16]196	196	EEF1A1	T3	OUT
sp|P68104|EF1A1_HUMAN	VETGVLKP[+16]GMVVTFAPVNVTTEVK	Elongation factor 1-alpha 1 OS=Homo sapiens OX=9606 GN=EEF1A1 PE=1 SV=1	P68104	266	0.0236996	0.0294528	0.0175978	0.0154911	0.0167528	0.0145838	0.0107804	0.0172056	0.00685781	EF1A1	EF1A1_P[+16]274	274	EEF1A1	T3	OUT
sp|P68104|EF1A1_HUMAN	VETGVLKPGM[+16]VVTFAPVNVTTEVK	Elongation factor 1-alpha 1 OS=Homo sapiens OX=9606 GN=EEF1A1 PE=1 SV=1	P68104	266	0.0224278	0.0285737	0.0166027	0.0155728	0.0166431	0.0145838	0.0107314	0.0168341	0.0068325	EF1A1	EF1A1_M[+16]276	276	EEF1A1	T3	OUT
sp|P68363|TBA1B_HUMAN	AFVHWYVGEGM[+16]EEGEFSEAR	Tubulin alpha-1B chain OS=Homo sapiens OX=9606 GN=TUBA1B PE=1 SV=1	P68363	402	0.0922783	0.120376	0.0711497	0.161598	0.00451555	0.00689087	0.00584305	0.0050168	0.0132179	TBA1B	TBA1B_M[+16]413	413	TUBA1B	T3	OUT
sp|P78527|PRKDC_HUMAN	VYQM[+16]PSFLQSVASVLLYLDTVPEVYTPVLEHLVVMQIDSFPQYSPK	DNA-dependent protein kinase catalytic subunit OS=Homo sapiens OX=9606 GN=PRKDC PE=1 SV=3	P78527	406	0.0574955	0.145209	0.0439924	0.0374645	0.0318958	0.0299441	0.0585786	0.0519357	0.0176911	PRKDC	PRKDC_M[+16]410	410	PRKDC	T3	L1
sp|P78527|PRKDC_HUMAN	F[+16]MNAVFFLLPK	DNA-dependent protein kinase catalytic subunit OS=Homo sapiens OX=9606 GN=PRKDC PE=1 SV=3	P78527	2377	0.22439	0.226257	0.316991	0.207069	0.15262	0.0715912	0.101649	0.315166	0.0554621	PRKDC	PRKDC_F[+16]2378	2378	PRKDC	T3	L1
sp|P78527|PRKDC_HUMAN	F[+16]LNTTFSFFPPFVSCIQDISCQHAALLSLDPAAVSAGCLASLQQPVGIR	DNA-dependent protein kinase catalytic subunit OS=Homo sapiens OX=9606 GN=PRKDC PE=1 SV=3	P78527	2842	0.0223761	0.000683449	0.0928582	0.0500719	0.0181694	0.105109	0.00696921	0.0120292	0.152166	PRKDC	PRKDC_F[+16]2843	2843	PRKDC	T3	L1
sp|P78527|PRKDC_HUMAN	VYQMPSFLQSVASVLLYLDTVPEVYTPVLEHLVVMQIDSF[+16]PQYSPK	DNA-dependent protein kinase catalytic subunit OS=Homo sapiens OX=9606 GN=PRKDC PE=1 SV=3	P78527	406	0.0149444	0.00734255	0.00367451	0.0465412	0.0194602	0.00551815	0.063571	0.0154799	0.011197	PRKDC	PRKDC_F[+16]446	446	PRKDC	T3	L1
sp|P78527|PRKDC_HUMAN	FLDALELSQSP[+16]MLLELMTEVLCR	DNA-dependent protein kinase catalytic subunit OS=Homo sapiens OX=9606 GN=PRKDC PE=1 SV=3	P78527	1745	0.0501168	0.135796	0.0869731	0.109745	0.183326	0.152925	0.1037	0.0941622	0.0296707	PRKDC	PRKDC_P[+16]1756	1756	PRKDC	T3	L1
sp|Q00325|MPCP_HUMAN	VLY[+16]SNMLGEENTYLWR	Phosphate carrier protein, mitochondrial OS=Homo sapiens OX=9606 GN=SLC25A3 PE=1 SV=2	Q00325	145	0.00222036	0.00670992	0.00908963	0.0175712	0.0313639	0.0269813	0.0157936	0.023054	0.0328278	MPCP	MPCP_Y[+16]148	148	SLC25A3	T3	OUT
sp|Q00325|MPCP_HUMAN	VLYSNM[+16]LGEENTYLWR	Phosphate carrier protein, mitochondrial OS=Homo sapiens OX=9606 GN=SLC25A3 PE=1 SV=2	Q00325	145	0.0200011	0.389495	0.0108477	0.0175712	0.0323006	0.0254167	0.018058	0.0239268	0.0345773	MPCP	MPCP_M[+16]151	151	SLC25A3	T3	OUT
sp|Q00325|MPCP_HUMAN	M[+16]YKEEGLK	Phosphate carrier protein, mitochondrial OS=Homo sapiens OX=9606 GN=SLC25A3 PE=1 SV=2	Q00325	206	0.0212642	0.0183126	0.00902147	0.00964955	0.0130982	0.0156923	0.00967951	0.00267831	0.00378623	MPCP	MPCP_M[+16]207	207	SLC25A3	T3	OUT
sp|Q00325|MPCP_HUMAN	SECSKP[+16]EQLVVTFVAGYIAGVFCAIVSHPADSVVSVLNK	Phosphate carrier protein, mitochondrial OS=Homo sapiens OX=9606 GN=SLC25A3 PE=1 SV=2	Q00325	254	0.00687053	0.00315265	0.00181892	0.000237304	0.00131999	0.00286278	0.000402255	0.00217805	0.00173632	MPCP	MPCP_P[+16]260	260	SLC25A3	T3	OUT
sp|Q00325|MPCP_HUMAN	M[+32]YKEEGLK	Phosphate carrier protein, mitochondrial OS=Homo sapiens OX=9606 GN=SLC25A3 PE=1 SV=2	Q00325	206	0.00559757	0.00372797	0.00709897	0.00903734	0.0201802	0.0134562	0.0246177	0.034428	0.0197591	MPCP	MPCP_M[+32]207	207	SLC25A3	T3	OUT
sp|Q00325|MPCP_HUMAN	GWAPTFLGYSM[+16]QGLCK	Phosphate carrier protein, mitochondrial OS=Homo sapiens OX=9606 GN=SLC25A3 PE=1 SV=2	Q00325	121	0.0805699	0.0661888	0.0156073	0.0167133	0.0679936	0.0196025	0.0123819	0.0157139	0.0533233	MPCP	MPCP_M[+16]132	132	SLC25A3	T3	OUT
sp|Q00610|CLH1_HUMAN	ISPDQGQQFAQM[+16]LVQDEEPLADITQIVDVFMEYNLIQQCTAFLLDALK	Clathrin heavy chain 1 OS=Homo sapiens OX=9606 GN=CLTC PE=1 SV=5	Q00610	523	0.0109355	0.00398274	0.0435061	0.0486394	0.000860731	0.0486992	0.00628472	0.0500584	0.0613073	CLH1	CLH1_M[+16]535	535	CLTC	T3	L1
sp|Q01082|SPTB2_HUMAN	IFQEMLYIMDWMDEM[+16]K	Spectrin beta chain, non-erythrocytic 1 OS=Homo sapiens OX=9606 GN=SPTBN1 PE=1 SV=2	Q01082	532	0.000261328	0.0524221	0.0264892	0.102424	0.0571225	0.0716592	0.0716594	0.0836998	0.0245687	SPTB2	SPTB2_M[+16]547	547	SPTBN1	T3	OUT
sp|Q01082|SPTB2_HUMAN	LEEASLLHQFQADADDIDAW[+16]MLDILK	Spectrin beta chain, non-erythrocytic 1 OS=Homo sapiens OX=9606 GN=SPTBN1 PE=1 SV=2	Q01082	739	0.0675783	0.158521	0.0382688	0.0424778	0.0401759	0.0532525	0.0347249	0.0459146	0.0819887	SPTB2	SPTB2_W[+16]759	759	SPTBN1	T3	OUT
sp|Q13813|SPTN1_HUMAN	SLGYDLPMVEEGEPDPEF[+16]EAILDTVDPNR	Spectrin alpha chain, non-erythrocytic 1 OS=Homo sapiens OX=9606 GN=SPTAN1 PE=1 SV=3	Q13813	2353	0.0645718	0.0116563	0.335318	0.089191	0.290212	0.261044	0.191501	0.234174	0.513647	SPTN1	SPTN1_F[+16]2371	2371	SPTAN1	T3	OUT
sp|Q13813|SPTN1_HUMAN	QK[+16]LDILDQER	Spectrin alpha chain, non-erythrocytic 1 OS=Homo sapiens OX=9606 GN=SPTAN1 PE=1 SV=3	Q13813	1417	0.264443	0.232012	0.38546	0.0172994	0.220382	0.483696	0.627499	0.168533	0.533154	SPTN1	SPTN1_K[+16]1419	1419	SPTAN1	T3	OUT
sp|Q14126|DSG2_HUMAN	GFTPIP[+16]GTIEMLHPWNNEGAPPEDK	Desmoglein-2 OS=Homo sapiens OX=9606 GN=DSG2 PE=1 SV=2	Q14126	642	0.0101649	0.00878469	0.00273685	0.00170022	0.0693102	0.0153421	0.000665107	0.0126983	0.0518285	DSG2	DSG2_P[+16]648	648	DSG2	T3	OUT
sp|Q14126|DSG2_HUMAN	VIQPHGGGSNPLEGTQHLQDVPYVM[+16]VR	Desmoglein-2 OS=Homo sapiens OX=9606 GN=DSG2 PE=1 SV=2	Q14126	990	0.09565	0.0712609	0.00334866	0.00384849	0.00490485	0.00691594	0.112277	0.00778075	0.00417905	DSG2	DSG2_M[+16]1015	1015	DSG2	T3	OUT
sp|Q14126|DSG2_HUMAN	VLDINDNEPVFTQDVFVGSVEELSAAHTLVM[+16]K	Desmoglein-2 OS=Homo sapiens OX=9606 GN=DSG2 PE=1 SV=2	Q14126	148	0.00176039	0.012029	0.0121998	0.011499	0.0195828	0.0131935	0.0147086	0.0118571	0.026987	DSG2	DSG2_M[+16]179	179	DSG2	T3	OUT
sp|Q14974|IMB1_HUMAN	MF[+16]QSTAGSGGVQEDALMAVSTLVEVLGGEFLK	Importin subunit beta-1 OS=Homo sapiens OX=9606 GN=KPNB1 PE=1 SV=2	Q14974	613	0.17226	0.158468	0.103256	0.139839	0.139399	0.122743	0.120606	0.169466	0.163895	IMB1	IMB1_F[+16]615	615	KPNB1	T3	OUT
sp|Q14974|IMB1_HUMAN	M[+16]FQSTAGSGGVQEDALMAVSTLVEVLGGEFLK	Importin subunit beta-1 OS=Homo sapiens OX=9606 GN=KPNB1 PE=1 SV=2	Q14974	613	0.174649	0.0577027	0.123737	0.132019	0.136128	0.123555	0.119323	0.148121	0.143673	IMB1	IMB1_M[+16]614	614	KPNB1	T3	OUT
sp|Q8WTV0|SCRB1_HUMAN	EIPIPFYLSVYFFDVM[+16]NPSEILK	Scavenger receptor class B member 1 OS=Homo sapiens OX=9606 GN=SCARB1 PE=1 SV=1	Q8WTV0	57	0.172496	0.430463	0.16431	0.242474	0.0913872	0.184341	0.263866	0.214885	0.107019	SCRB1	SCRB1_M[+16]73	73	SCARB1	T3	OUT
sp|Q8WTV0|SCRB1_HUMAN	IEPVVLPLLWFAESGAMEGETLHTFYTQLVLM[+16]PK	Scavenger receptor class B member 1 OS=Homo sapiens OX=9606 GN=SCARB1 PE=1 SV=1	Q8WTV0	405	0.193132	0.111435	0.0659902	0.099259	0.158096	0.0148161	0.071877	0.0866164	0.117385	SCRB1	SCRB1_M[+16]437	437	SCARB1	T3	OUT
sp|Q8WTV0|SCRB1_HUMAN	IDPSSLSFNM[+16]WK	Scavenger receptor class B member 1 OS=Homo sapiens OX=9606 GN=SCARB1 PE=1 SV=1	Q8WTV0	45	0.0635934	0.0444836	0.13194	0.0466017	0.103304	0.146153	0.0299267	0.119695	0.154523	SCRB1	SCRB1_M[+16]55	55	SCARB1	T3	OUT
sp|Q9NR30|DDX21_HUMAN	EGAF[+16]SNFPISEETIK	Nucleolar RNA helicase 2 OS=Homo sapiens OX=9606 GN=DDX21 PE=1 SV=5	Q9NR30	184	0.0155165	0.0612155	0.152401	0.127772	0.0693855	0.255725	0.116656	0.207131	0.214012	DDX21	DDX21_F[+16]188	188	DDX21	T3	L1
sp|Q9NR30|DDX21_HUMAN	HVVLDEVDQMLDMGF[+16]ADQVEEILSVAYK	Nucleolar RNA helicase 2 OS=Homo sapiens OX=9606 GN=DDX21 PE=1 SV=5	Q9NR30	334	0.00617229	0.00983937	0.0146688	0.0834672	0.070433	0.0280069	0.0689382	0.0526254	0.00825772	DDX21	DDX21_F[+16]349	349	DDX21	T3	L1
sp|A0FGR8|ESYT2_HUMAN	VILEPLIGDM[+16]PLVGALSIFFLR	Extended synaptotagmin-2 OS=Homo sapiens OX=9606 GN=ESYT2 PE=1 SV=1	A0FGR8	301	0.18937	0.120166	0.0133559	0.0598662	0.0660553	0.0632114	0.0577077	0.0793781	0.0492126	ESYT2	ESYT2_M[+16]311	311	ESYT2	T4	OUT
sp|A1L0T0|ILVBL_HUMAN	NAQM[+16]AQSPILLLGGAASTLLQNR	Acetolactate synthase-like protein OS=Homo sapiens OX=9606 GN=ILVBL PE=1 SV=2	A1L0T0	134	0.0449488	0.0409334	0.0262862	0.00681732	0.0290275	0.0333338	0.0188839	0.0258207	0.0201729	ILVBL	ILVBL_M[+16]138	138	ILVBL	T4	OUT
sp|A1L0T0|ILVBL_HUMAN	VVSW[+32]YLENYLANLFAGAWEPQPEGPLPLDIPQASPQQVQR	Acetolactate synthase-like protein OS=Homo sapiens OX=9606 GN=ILVBL PE=1 SV=2	A1L0T0	235	0.0303771	0.00502364	0.0369423	0.0109576	0.123044	0.065856	0.0137553	0.00713229	0.176477	ILVBL	ILVBL_W[+32]239	239	ILVBL	T4	OUT
sp|A1L0T0|ILVBL_HUMAN	AAM[+16]PVAQHLNPVQVLQLVEETLPDNSILVVDGGDFVGTAAHLVQPR	Acetolactate synthase-like protein OS=Homo sapiens OX=9606 GN=ILVBL PE=1 SV=2	A1L0T0	436	0.0232971	0.0249489	0.0799662	0.041995	0.21678	0.0591752	0.0262891	0.0194363	0.101588	ILVBL	ILVBL_M[+16]439	439	ILVBL	T4	OUT
sp|O00264|PGRC1_HUMAN	GLATFCLDKEALKDEY[+32]DDLSDLTAAQQETLSDWESQFTFK	Membrane-associated progesterone receptor component 1 OS=Homo sapiens OX=9606 GN=PGRMC1 PE=1 SV=3	O00264	123	0.0418814	0.00109282	0.0131394	0.00408876	0.0135118	0.0106469	0.00101788	0.00253609	0.0101716	PGRC1	PGRC1_Y[+32]139	139	PGRMC1	T4	OUT
sp|O14880|MGST3_HUMAN	YKVEYPIM[+16]YSTDPENGHIFNCIQR	Microsomal glutathione S-transferase 3 OS=Homo sapiens OX=9606 GN=MGST3 PE=1 SV=1	O14880	35	0.0656716	0.0768338	0.0890473	0.00200921	0.0196286	0.0208846	0.0326604	0.0014281	0.0670105	MGST3	MGST3_M[+16]43	43	MGST3	T4	L1
sp|O14880|MGST3_HUMAN	GALGSIALLGLVGTTVCSAFQHLGW[+16]VK	Microsomal glutathione S-transferase 3 OS=Homo sapiens OX=9606 GN=MGST3 PE=1 SV=1	O14880	114	0.00705421	0.0125826	0.021423	0.00682696	0.00909611	0.00776987	0.00700216	0.0189001	0.0152153	MGST3	MGST3_W[+16]139	139	MGST3	T4	L1
sp|O14880|MGST3_HUMAN	GALGSIALLGLVGTTVCSAFQHLGW[+32]VK	Microsomal glutathione S-transferase 3 OS=Homo sapiens OX=9606 GN=MGST3 PE=1 SV=1	O14880	114	0.0421417	0.00385984	0.00953087	0.00177071	0.00554865	0.00478838	0.00354007	0.00223416	0.00218299	MGST3	MGST3_W[+32]139	139	MGST3	T4	L1
sp|O15121|DEGS1_HUMAN	WFGM[+16]FANLPIGIPYSISFK	Sphingolipid delta(4)-desaturase DES1 OS=Homo sapiens OX=9606 GN=DEGS1 PE=1 SV=1	O15121	106	0.421738	0.333154	0.120297	0.076587	0.766082	0.359676	0.188472	0.29559	0.374111	DEGS1	DEGS1_M[+16]110	110	DEGS1	T4	OUT
sp|O15260|SURF4_HUMAN	M[+16]WFQWSEQR	Surfeit locus protein 4 OS=Homo sapiens OX=9606 GN=SURF4 PE=1 SV=3	O15260	43	0.0507353	0.0488296	0.0316867	0.0358551	0.0374225	0.0570598	0.0484937	0.0529332	0.0490682	SURF4	SURF4_M[+16]44	44	SURF4	T4	OUT
sp|O15260|SURF4_HUMAN	MW[+16]FQWSEQR	Surfeit locus protein 4 OS=Homo sapiens OX=9606 GN=SURF4 PE=1 SV=3	O15260	43	0.0564077	0.0438003	0.0539005	0.0690032	0.0554653	0.0570075	0.0431763	0.0487947	0.0707758	SURF4	SURF4_W[+16]45	45	SURF4	T4	OUT
sp|O15260|SURF4_HUMAN	MWF[+32]QWSEQR	Surfeit locus protein 4 OS=Homo sapiens OX=9606 GN=SURF4 PE=1 SV=3	O15260	43	0.012642	0.00931975	0.0144487	0.000850838	0.00630458	0.0108301	0.00107778	0.0018045	0.00687693	SURF4	SURF4_F[+32]46	46	SURF4	T4	OUT
sp|O15260|SURF4_HUMAN	SM[+16]FAGVPTMR	Surfeit locus protein 4 OS=Homo sapiens OX=9606 GN=SURF4 PE=1 SV=3	O15260	139	0.0463714	0.0488477	0.0421535	0.0321625	0.0402881	0.045108	0.0360256	0.0384683	0.0466342	SURF4	SURF4_M[+16]141	141	SURF4	T4	OUT
sp|O43169|CYB5B_HUMAN	ELW[+16]LVIHGR	Cytochrome b5 type B OS=Homo sapiens OX=9606 GN=CYB5B PE=1 SV=3	O43169	39	0.0112036	0.0378151	0.00711391	0.00146748	0.00575714	0.00291216	0.00381786	0.0102005	0.0054169	CYB5B	CYB5B_W[+16]42	42	CYB5B	T4	OUT
sp|O43169|CYB5B_HUMAN	ELW[+32]LVIHGR	Cytochrome b5 type B OS=Homo sapiens OX=9606 GN=CYB5B PE=1 SV=3	O43169	39	0.00388791	0.0018086	0.0230204	0.015028	0.0247058	0.0190616	0.0115399	0.0135136	0.0180171	CYB5B	CYB5B_W[+32]42	42	CYB5B	T4	OUT
sp|O43826|G6PT1_HUMAN	FVSGVLSDQM[+16]SAR	Glucose-6-phosphate exchanger SLC37A4 OS=Homo sapiens OX=9606 GN=SLC37A4 PE=1 SV=1	O43826	64	0.189582	0.158224	0.0526239	0.032686	0.0628465	0.055977	0.026604	0.0417571	0.0102658	G6PT1	G6PT1_M[+16]74	74	SLC37A4	T4	OUT
sp|O43837|IDH3B_HUMAN	EQTEGEY[+16]SSLEHESAR	Isocitrate dehydrogenase [NAD] subunit beta, mitochondrial OS=Homo sapiens OX=9606 GN=IDH3B PE=1 SV=2	O43837	164	0.03246	0.640124	0.273256	0.43711	0.0717572	0.656839	0.128649	0.336517	0.436864	IDH3B	IDH3B_Y[+16]171	171	IDH3B	T4	OUT
sp|O75396|SC22B_HUMAN	IM[+16]VANIEEVLQR	Vesicle-trafficking protein SEC22b OS=Homo sapiens OX=9606 GN=SEC22B PE=1 SV=4	O75396	147	0.00121365	0.0318919	0.00252176	0.00298842	0.0260039	0.0289086	0.0291546	0.0443105	0.0322639	SC22B	SC22B_M[+16]149	149	SEC22B	T4	OUT
sp|O75880|SCO1_HUMAN	M[+16]IQVVDEIDSITTLPDLTPLFISIDPER	Protein SCO1 homolog, mitochondrial OS=Homo sapiens OX=9606 GN=SCO1 PE=1 SV=1	O75880	179	0.0510475	0.0193521	0.0196044	0.0290351	0.105909	0.0270013	0.04701	0.0550395	0.0140575	SCO1	SCO1_M[+16]180	180	SCO1	T4	OUT
sp|O94956|SO2B1_HUMAN	MIGYGAILVALAGLLM[+32]TLPHFISEPYR	Solute carrier organic anion transporter family member 2B1 OS=Homo sapiens OX=9606 GN=SLCO2B1 PE=1 SV=2	O94956	116	0.362599	0.400549	0.287895	0.335015	0.313841	0.296831	0.363831	0.370975	0.333541	SO2B1	SO2B1_M[+32]132	132	SLCO2B1	T4
sp|O94956|SO2B1_HUMAN	M[+16]IGYGAILVALAGLLMTLPHFISEPYR	Solute carrier organic anion transporter family member 2B1 OS=Homo sapiens OX=9606 GN=SLCO2B1 PE=1 SV=2	O94956	116	0.528661	0.502326	0.419166	0.269402	0.380003	0.386789	0.447959	0.297186	0.491955	SO2B1	SO2B1_M[+16]117	117	SLCO2B1	T4
sp|O94956|SO2B1_HUMAN	MIGY[+32]GAILVALAGLLMTLPHFISEPYR	Solute carrier organic anion transporter family member 2B1 OS=Homo sapiens OX=9606 GN=SLCO2B1 PE=1 SV=2	O94956	116	0.10874	0.0971253	0.292939	0.395583	0.306156	0.31638	0.18821	0.331839	0.174504	SO2B1	SO2B1_Y[+32]120	120	SLCO2B1	T4
sp|O94973|AP2A2_HUMAN	QLSNP[+16]QQEVQNIFK	AP-2 complex subunit alpha-2 OS=Homo sapiens OX=9606 GN=AP2A2 PE=1 SV=2	O94973	842	0.670272	0.540617	0.671371	0.0910169	0.300377	0.754672	0.24428	0.568052	0.643639	AP2A2	AP2A2_P[+16]847	847	AP2A2	T4	OUT
sp|O95292|VAPB_HUMAN	F[+16]MVQSMFAPTDTSDMEAVWK	Vesicle-associated membrane protein-associated protein B/C OS=Homo sapiens OX=9606 GN=VAPB PE=1 SV=3	O95292	87	0.066156	0.0026277	0.0640838	0.0598659	0.0637147	0.0724908	0.0638568	0.0571366	0.0648072	VAPB	VAPB_F[+16]88	88	VAPB	T4	OUT
sp|O95470|SGPL1_HUMAN	AYGDF[+16]AWSNPLHPDIFPGLR	Sphingosine-1-phosphate lyase 1 OS=Homo sapiens OX=9606 GN=SGPL1 PE=1 SV=3	O95470	162	0.0169941	0.0543239	0.0130865	0.00737746	0.0128589	0.0103588	0.00996889	0.00806199	0.0156789	SGPL1	SGPL1_F[+16]167	167	SGPL1	T4	OUT
sp|O95470|SGPL1_HUMAN	NTAM[+16]LVCSTPQFPHGVIDPVPEVAK	Sphingosine-1-phosphate lyase 1 OS=Homo sapiens OX=9606 GN=SGPL1 PE=1 SV=3	O95470	278	0.00483422	0.00361754	0.0120022	0.0166896	0.0113026	0.0044758	0.010077	0.00676851	0.0144308	SGPL1	SGPL1_M[+16]282	282	SGPL1	T4	OUT
sp|O96000|NDUBA_HUMAN	EGQNY[+32]QQNCIK	NADH dehydrogenase [ubiquinone] 1 beta subcomplex subunit 10 OS=Homo sapiens OX=9606 GN=NDUFB10 PE=1 SV=3	O96000	110	0.0779912	0.313827	0.115595	0.0145638	0.0530935	0.0992433	0.462183	0.0385713	0.0858882	NDUBA	NDUBA_Y[+32]115	115	NDUFB10	T4	OUT
sp|O96008|TOM40_HUMAN	QLSPTEAF[+16]PVLVGDMDNSGSLNAQVIHQLGPGLR	Mitochondrial import receptor subunit TOM40 homolog OS=Homo sapiens OX=9606 GN=TOMM40 PE=1 SV=1	O96008	139	0.24482	0.259563	0.265974	0.2291	0.243786	0.242393	0.17515	0.253159	0.225081	TOM40	TOM40_F[+16]147	147	TOMM40	T4	OUT
sp|O96008|TOM40_HUMAN	FVNW[+32]QVDGEYR	Mitochondrial import receptor subunit TOM40 homolog OS=Homo sapiens OX=9606 GN=TOMM40 PE=1 SV=1	O96008	184	0.026572	0.0300103	0.0945809	0.0793646	0.0783322	0.0274992	0.080874	0.0799714	0.0471414	TOM40	TOM40_W[+32]188	188	TOMM40	T4	OUT
sp|P00167|CYB5_HUMAN	LNKPPETLITTIDSSSSWWTNWVIPAISAVAVALM[+16]YR	Cytochrome b5 OS=Homo sapiens OX=9606 GN=CYB5A PE=1 SV=2	P00167	91	0.384521	0.245303	0.106982	0.340202	0.393359	0.506821	0.276019	0.346622	0.25381	CYB5	CYB5_M[+16]126	126	CYB5A	T4	OUT
sp|P01892|1A02_HUMAN	SWTAADM[+16]AAQTTK	HLA class I histocompatibility antigen, A-2 alpha chain OS=Homo sapiens OX=9606 GN=HLA-A PE=1 SV=1	P01892	155	0.0142312	0.208037	0.0160689	0.237249	0.00667288	0.0084482	0.00157741	0.00662699	0.0147405	1A02	1A02_M[+16]162	162	HLA-A	T4	L2
sp|P04843|RPN1_HUMAN	THYIVGYNLPSY[+32]EYLYNLGDQYALK	Dolichyl-diphosphooligosaccharide--protein glycosyltransferase subunit 1 OS=Homo sapiens OX=9606 GN=RPN1 PE=1 SV=1	P04843	327	0.000874718	0.00691183	0.00333748	0.000567369	0.00487034	0.00629715	0.000205747	0.00141846	0.00481019	RPN1	RPN1_Y[+32]339	339	RPN1	T4	OUT
sp|P04843|RPN1_HUMAN	THYIVGYNLPSYEYLY[+32]NLGDQYALK	Dolichyl-diphosphooligosaccharide--protein glycosyltransferase subunit 1 OS=Homo sapiens OX=9606 GN=RPN1 PE=1 SV=1	P04843	327	0.00314288	0.0069949	0.00213367	0.00191711	0.00479177	0.00673022	0.00320618	0.00140305	0.0048567	RPN1	RPN1_Y[+32]343	343	RPN1	T4	OUT
sp|P04843|RPN1_HUMAN	QFVVF[+16]EGNHYFYSPYPTK	Dolichyl-diphosphooligosaccharide--protein glycosyltransferase subunit 1 OS=Homo sapiens OX=9606 GN=RPN1 PE=1 SV=1	P04843	151	0.00199005	0.306722	0.0179305	0.00902044	0.00989721	0.00523817	0.0114731	0.0148373	0.00774202	RPN1	RPN1_F[+16]156	156	RPN1	T4	OUT
sp|P04844|RPN2_HUMAN	M[+16]LAQQAVK	Dolichyl-diphosphooligosaccharide--protein glycosyltransferase subunit 2 OS=Homo sapiens OX=9606 GN=RPN2 PE=1 SV=3	P04844	619	0.0700593	0.087243	0.0163708	0.0240021	0.0139123	0.057116	0.0191561	0.031263	0.00860657	RPN2	RPN2_M[+16]620	620	RPN2	T4	OUT
sp|P04844|RPN2_HUMAN	LMDH[+16]VGTEPSIKEDQVIQLMNAIFSK	Dolichyl-diphosphooligosaccharide--protein glycosyltransferase subunit 2 OS=Homo sapiens OX=9606 GN=RPN2 PE=1 SV=3	P04844	217	0.0303628	0.0151858	0.0128341	0.0687616	0.0083463	0.0175935	0.0291348	0.0710619	0.0243267	RPN2	RPN2_H[+16]221	221	RPN2	T4	OUT
sp|P04844|RPN2_HUMAN	TSFTPVGDVFELNFM[+16]NVK	Dolichyl-diphosphooligosaccharide--protein glycosyltransferase subunit 2 OS=Homo sapiens OX=9606 GN=RPN2 PE=1 SV=3	P04844	322	0.040808	0.0266303	0.0214954	0.0206632	0.0276805	0.0333272	0.0319009	0.036957	0.0427602	RPN2	RPN2_M[+16]337	337	RPN2	T4	OUT
sp|P05023|AT1A1_HUMAN	DKY[+32]EPAAVSEQGDKK	Sodium/potassium-transporting ATPase subunit alpha-1 OS=Homo sapiens OX=9606 GN=ATP1A1 PE=1 SV=1	P05023	7	0.0144474	0.00272487	0.0298406	0.00296713	0.0137871	0.0117865	0.000860004	0.00961878	0.0265276	AT1A1	AT1A1_Y[+32]10	10	ATP1A1	T4	OUT
sp|P05023|AT1A1_HUMAN	M[+16]SINAEEVVVGDLVEVK	Sodium/potassium-transporting ATPase subunit alpha-1 OS=Homo sapiens OX=9606 GN=ATP1A1 PE=1 SV=1	P05023	177	0.0145192	0.0691295	0.024127	0.0130041	0.0322547	0.0279981	0.0315947	0.0342642	0.125238	AT1A1	AT1A1_M[+16]178	178	ATP1A1	T4	OUT
sp|P05023|AT1A1_HUMAN	M[+16]TVAHMWFDNQIHEADTTENQSGVSFDK	Sodium/potassium-transporting ATPase subunit alpha-1 OS=Homo sapiens OX=9606 GN=ATP1A1 PE=1 SV=1	P05023	385	0.0242655	0.00985156	0.0377119	0.0175887	0.0257115	0.0418749	0.0383	0.0215473	0.0397141	AT1A1	AT1A1_M[+16]386	386	ATP1A1	T4	OUT
sp|P05023|AT1A1_HUMAN	MTVAHMW[+16]FDNQIHEADTTENQSGVSFDK	Sodium/potassium-transporting ATPase subunit alpha-1 OS=Homo sapiens OX=9606 GN=ATP1A1 PE=1 SV=1	P05023	385	0.00266388	0.00172899	0.00142456	0	0.000256428	0.000977587	0.0157054	0.00136216	0.00171478	AT1A1	AT1A1_W[+16]392	392	ATP1A1	T4	OUT
sp|P05023|AT1A1_HUMAN	TSATW[+16]LALSR	Sodium/potassium-transporting ATPase subunit alpha-1 OS=Homo sapiens OX=9606 GN=ATP1A1 PE=1 SV=1	P05023	413	0.0479373	0.0184761	0.0305848	0.0226027	0.0370176	0.039331	0.0268061	0.00652332	0.0333121	AT1A1	AT1A1_W[+16]418	418	ATP1A1	T4	OUT
sp|P05023|AT1A1_HUMAN	TSATW[+32]LALSR	Sodium/potassium-transporting ATPase subunit alpha-1 OS=Homo sapiens OX=9606 GN=ATP1A1 PE=1 SV=1	P05023	413	0.00859511	0.0118968	0.0109817	0.0101944	0.0107323	0.0142616	0.0146414	0.0129391	0.0126491	AT1A1	AT1A1_W[+32]418	418	ATP1A1	T4	OUT
sp|P05023|AT1A1_HUMAN	VLGFCHLFLPDEQF[+16]PEGFQFDTDDVNFPIDNLCFVGLISMIDPPR	Sodium/potassium-transporting ATPase subunit alpha-1 OS=Homo sapiens OX=9606 GN=ATP1A1 PE=1 SV=1	P05023	551	0.000303101	1.34984e-05	0.0169908	0.0437698	0.00463518	0.000691146	0.0043671	0.00173863	0.0144568	AT1A1	AT1A1_F[+16]565	565	ATP1A1	T4	OUT
sp|P05023|AT1A1_HUMAN	VLGFCHLFLPDEQFPEGFQFDTDDVNFPIDNLCFVGLISM[+16]IDPPR	Sodium/potassium-transporting ATPase subunit alpha-1 OS=Homo sapiens OX=9606 GN=ATP1A1 PE=1 SV=1	P05023	551	0.0655	0.0432152	0.146854	0.0728735	0.061136	0.155912	0.0271544	0.304124	0.124512	AT1A1	AT1A1_M[+16]591	591	ATP1A1	T4	OUT
sp|P05023|AT1A1_HUMAN	DM[+16]TSEQLDDILK	Sodium/potassium-transporting ATPase subunit alpha-1 OS=Homo sapiens OX=9606 GN=ATP1A1 PE=1 SV=1	P05023	671	0.0270594	0.0291235	0.0264149	0.0240249	0.0259755	0.0305548	0.0294309	0.0317145	0.0413235	AT1A1	AT1A1_M[+16]673	673	ATP1A1	T4	OUT
sp|P05023|AT1A1_HUMAN	ADIGVAM[+16]GIAGSDVSK	Sodium/potassium-transporting ATPase subunit alpha-1 OS=Homo sapiens OX=9606 GN=ATP1A1 PE=1 SV=1	P05023	727	0.164646	0.0208802	0.168673	0.00259056	0.0287255	0.109746	0.16093	0.00547577	0.0376114	AT1A1	AT1A1_M[+16]734	734	ATP1A1	T4	OUT
sp|P05023|AT1A1_HUMAN	LISM[+16]AYGQIGMIQALGGFFTYFVILAENGFLPIHLLGLR	Sodium/potassium-transporting ATPase subunit alpha-1 OS=Homo sapiens OX=9606 GN=ATP1A1 PE=1 SV=1	P05023	848	0.242349	0.176882	0.112304	0.0366198	0.0841786	0.13026	0.250125	0.0873427	0.207118	AT1A1	AT1A1_M[+16]852	852	ATP1A1	T4	OUT
sp|P05023|AT1A1_HUMAN	LISMAY[+16]GQIGMIQALGGFFTYFVILAENGFLPIHLLGLR	Sodium/potassium-transporting ATPase subunit alpha-1 OS=Homo sapiens OX=9606 GN=ATP1A1 PE=1 SV=1	P05023	848	0.184027	0.140244	0.0884581	0.0486459	0.0679215	0.0979577	0.0401278	0.0778332	0.141418	AT1A1	AT1A1_Y[+16]854	854	ATP1A1	T4	OUT
sp|P05023|AT1A1_HUMAN	VDWDDRWINDVEDSY[+32]GQQWTYEQR	Sodium/potassium-transporting ATPase subunit alpha-1 OS=Homo sapiens OX=9606 GN=ATP1A1 PE=1 SV=1	P05023	887	0.000387629	0.000684361	0.0583941	0.0848615	0.0553796	0.0489844	0.120277	0.0911388	0.0564693	AT1A1	AT1A1_Y[+32]902	902	ATP1A1	T4	OUT
sp|P05023|AT1A1_HUMAN	W[+32]INDVEDSYGQQWTYEQR	Sodium/potassium-transporting ATPase subunit alpha-1 OS=Homo sapiens OX=9606 GN=ATP1A1 PE=1 SV=1	P05023	893	0.00586776	0.000459785	0.0261266	0.00131605	0.0349134	0.033007	0.000727837	0.000245183	0.0315206	AT1A1	AT1A1_W[+32]894	894	ATP1A1	T4	OUT
sp|P05023|AT1A1_HUMAN	NSVFQQGMK[+16]NKILIFGLFEETALAAFLSYCPGMGVALR	Sodium/potassium-transporting ATPase subunit alpha-1 OS=Homo sapiens OX=9606 GN=ATP1A1 PE=1 SV=1	P05023	941	0.113426	0.0073791	0.0146351	0.13565	0.196478	0.0034975	0.192272	0.188341	0.00580846	AT1A1	AT1A1_K[+16]950	950	ATP1A1	T4	OUT
sp|P05023|AT1A1_HUMAN	NSVFQQGMKNKILIFGLFEETALAAF[+16]LSYCPGMGVALR	Sodium/potassium-transporting ATPase subunit alpha-1 OS=Homo sapiens OX=9606 GN=ATP1A1 PE=1 SV=1	P05023	941	0.240862	0.198336	0.222426	0.694524	0.0251878	0.028831	0.305633	0.240792	0.249164	AT1A1	AT1A1_F[+16]967	967	ATP1A1	T4	OUT
sp|P05023|AT1A1_HUMAN	M[+16]YPLKPTWWFCAFPYSLLIFVYDEVR	Sodium/potassium-transporting ATPase subunit alpha-1 OS=Homo sapiens OX=9606 GN=ATP1A1 PE=1 SV=1	P05023	979	0.0213133	0.427026	0.338187	0.258001	0.102635	0.270326	0.0574863	0.0178309	0.250215	AT1A1	AT1A1_M[+16]980	980	ATP1A1	T4	OUT
sp|P05023|AT1A1_HUMAN	MY[+16]PLKPTWWFCAFPYSLLIFVYDEVR	Sodium/potassium-transporting ATPase subunit alpha-1 OS=Homo sapiens OX=9606 GN=ATP1A1 PE=1 SV=1	P05023	979	0.225858	0.316194	0.33331	0.225742	0.310689	0.227391	0.0397884	0.405213	0.256954	AT1A1	AT1A1_Y[+16]981	981	ATP1A1	T4	OUT
sp|P05026|AT1B1_HUMAN	DDM[+16]IFEDCGDVPSEPK	Sodium/potassium-transporting ATPase subunit beta-1 OS=Homo sapiens OX=9606 GN=ATP1B1 PE=1 SV=1	P05026	118	0.0292614	0.0323792	0.0178994	0.000782269	0.0176577	0.0120151	0.0024276	0.038661	0.0140362	AT1B1	AT1B1_M[+16]121	121	ATP1B1	T4	OUT
sp|P05026|AT1B1_HUMAN	AY[+32]GENIGYSEK	Sodium/potassium-transporting ATPase subunit beta-1 OS=Homo sapiens OX=9606 GN=ATP1B1 PE=1 SV=1	P05026	277	0.0469955	0.00171738	0.0620498	0.00893555	0.0594123	0.0591402	0.0118433	0.00935673	0.0497127	AT1B1	AT1B1_Y[+32]279	279	ATP1B1	T4	OUT
sp|P07099|HYEP_HUMAN	M[+16]WLEILLTSVLGFAIYWFISRDKEETLPLEDGWWGPGTR	Epoxide hydrolase 1 OS=Homo sapiens OX=9606 GN=EPHX1 PE=1 SV=1	P07099	0	0.569244	0.122163	0.577883	0.500123	0	0.476383	0.518755	0.500216	0.500177	HYEP	HYEP_M[+16]1	1	EPHX1	T4
sp|P07099|HYEP_HUMAN	MW[+16]LEILLTSVLGFAIYWFISRDKEETLPLEDGWWGPGTR	Epoxide hydrolase 1 OS=Homo sapiens OX=9606 GN=EPHX1 PE=1 SV=1	P07099	0	0.430756	0.877837	0.422117	0.499877	1	0.523617	0.481245	0.499784	0.499823	HYEP	HYEP_W[+16]2	2	EPHX1	T4
sp|P09327|VILI_HUMAN	HVETNSY[+32]DVQR	Villin-1 OS=Homo sapiens OX=9606 GN=VIL1 PE=1 SV=4	P09327	127	0.021598	0.0201274	0.0301663	0.0167201	0.0243721	0.020777	0.0120022	0.00722474	0.0311755	VILI	VILI_Y[+32]134	134	VIL1	T4	OUT
sp|P09327|VILI_HUMAN	M[+16]VDDGSGEVQVWR	Villin-1 OS=Homo sapiens OX=9606 GN=VIL1 PE=1 SV=4	P09327	391	0.0349494	0.0288357	0.0326434	0.00433295	0.0573846	0.0476849	0.00214474	0.0412133	0.0458453	VILI	VILI_M[+16]392	392	VIL1	T4	OUT
sp|P14854|CX6B1_HUMAN	NCW[+32]QNYLDFHR	Cytochrome c oxidase subunit 6B1 OS=Homo sapiens OX=9606 GN=COX6B1 PE=1 SV=2	P14854	28	0.018709	0.0124881	0.0206765	0.0275811	0.0328101	0.0326819	0.0243332	0.0273566	0.0280505	CX6B1	CX6B1_W[+32]31	31	COX6B1	T4	L1
sp|P15328|FOLR1_HUMAN	TELLNVCM[+16]NAK	Folate receptor alpha OS=Homo sapiens OX=9606 GN=FOLR1 PE=1 SV=3	P15328	30	0.0654514	0.053922	0.0102288	0.00362008	0.0593175	0.0484475	0.00837156	0.0313486	0.0451381	FOLR1	FOLR1_M[+16]38	38	FOLR1	T4	OUT
sp|P15328|FOLR1_HUMAN	HFIQDTCLY[+32]ECSPNLGPWIQQVDQSWR	Folate receptor alpha OS=Homo sapiens OX=9606 GN=FOLR1 PE=1 SV=3	P15328	98	0.014694	0.0101609	0.0304341	0.0142346	0.0188283	0.0262348	0.0181574	0.0103986	0.0300421	FOLR1	FOLR1_Y[+32]107	107	FOLR1	T4	OUT
sp|P20020|AT2B1_HUMAN	AVQM[+16]LWVNLIMDTLASLALATEPPTESLLLR	Plasma membrane calcium-transporting ATPase 1 OS=Homo sapiens OX=9606 GN=ATP2B1 PE=1 SV=4	P20020	883	0.180706	0.269422	0.284713	0.255772	0.24819	0.178215	0.226348	0.228409	0.231252	AT2B1	AT2B1_M[+16]887	887	ATP2B1	T4	OUT
sp|P20674|COX5A_HUMAN	WVTY[+32]FNKPDIDAWELR	Cytochrome c oxidase subunit 5A, mitochondrial OS=Homo sapiens OX=9606 GN=COX5A PE=1 SV=2	P20674	55	0.102816	0.0825923	0.0928257	0.0415075	0.095871	0.0784138	0.0350075	0.0180502	0.1119	COX5A	COX5A_Y[+32]59	59	COX5A	T4	OUT
sp|P27216|ANX13_HUMAN	GM[+16]GTNEAAIIEILSGR	Annexin A13 OS=Homo sapiens OX=9606 GN=ANXA13 PE=1 SV=3	P27216	28	0.0280723	0.0747729	0.00116725	0.0196862	0.437877	0.00494579	0.0134302	0.00674621	0.0569582	ANX13	ANX13_M[+16]30	30	ANXA13	T4	OUT
sp|P27449|VATL_HUMAN	SGP[+16]EYASFFAVMGASAAMVFSALGAAYGTAK	V-type proton ATPase 16 kDa proteolipid subunit OS=Homo sapiens OX=9606 GN=ATP6V0C PE=1 SV=1	P27449	5	0.0716858	0.0264432	0.056049	0.109414	0.0988377	0.186406	0.0528627	0.0877223	0.0941333	VATL	VATL_P[+16]8	8	ATP6V0C	T4	L1
sp|P39656|OST48_HUMAN	GVGM[+16]VADPDNPLVLDILTGSSTSYSFFPDKPITQYPHAVGK	Dolichyl-diphosphooligosaccharide--protein glycosyltransferase 48 kDa subunit OS=Homo sapiens OX=9606 GN=DDOST PE=1 SV=4	P39656	198	0.029116	0.0289877	0.0517925	0.0401783	0.0565101	0.0587391	0.0361749	0.0445992	0.0223894	OST48	OST48_M[+16]202	202	DDOST	T4	L1
sp|P39656|OST48_HUMAN	FIPSAYPYYASAFSMMLGLFIFSIVFLH[+16]MK	Dolichyl-diphosphooligosaccharide--protein glycosyltransferase 48 kDa subunit OS=Homo sapiens OX=9606 GN=DDOST PE=1 SV=4	P39656	420	0.362947	0.472043	0.397311	0.13737	0.010981	0.445512	0.104159	0.0407179	0.358954	OST48	OST48_H[+16]448	448	DDOST	T4	L1
sp|P39656|OST48_HUMAN	FIPSAYPYYASAFSMMLGLFIFSIVFLHM[+16]K	Dolichyl-diphosphooligosaccharide--protein glycosyltransferase 48 kDa subunit OS=Homo sapiens OX=9606 GN=DDOST PE=1 SV=4	P39656	420	0.397714	0.472798	0.428229	0.137272	0.73743	0.445512	0.107331	0.450991	0.35911	OST48	OST48_M[+16]449	449	DDOST	T4	L1
sp|P39656|OST48_HUMAN	FIPSAYPYYASAFSMMLGLFIFSIVFLHMK[+16]EK	Dolichyl-diphosphooligosaccharide--protein glycosyltransferase 48 kDa subunit OS=Homo sapiens OX=9606 GN=DDOST PE=1 SV=4	P39656	420	0.347301	0.166125	0.26271	0.293991	0.254618	0.261984	0.245434	0.265684	0.265741	OST48	OST48_K[+16]450	450	DDOST	T4	L1
sp|P42167|LAP2B_HUMAN	EM[+16]FPYEASTPTGISASCR	Lamina-associated polypeptide 2, isoforms beta/gamma OS=Homo sapiens OX=9606 GN=TMPO PE=1 SV=2	P42167	346	0.0438536	0.044727	0.0431387	0.13181	0.0306353	0.0315255	0.00789597	0.0148543	0.0409121	LAP2B	LAP2B_M[+16]348	348	TMPO	T4	OUT
sp|P46977|STT3A_HUMAN	ENDY[+32]YTPTGEFR	Dolichyl-diphosphooligosaccharide--protein glycosyltransferase subunit STT3A OS=Homo sapiens OX=9606 GN=STT3A PE=1 SV=2	P46977	613	0.000488196	0.00303727	0.0122113	0.00830147	0.000962696	0.0147015	0.00898515	0.0132944	0.000864189	STT3A	STT3A_Y[+32]617	617	STT3A	T4	L1
sp|P46977|STT3A_HUMAN	VGQAM[+16]ASTEEK	Dolichyl-diphosphooligosaccharide--protein glycosyltransferase subunit STT3A OS=Homo sapiens OX=9606 GN=STT3A PE=1 SV=2	P46977	554	0.0386687	0.0133454	0.00190977	0.000218407	0.0193156	0.0518326	0.000569176	0.0115484	0.0586527	STT3A	STT3A_M[+16]559	559	STT3A	T4	L1
sp|P49257|LMAN1_HUMAN	GAGM[+16]PGQHGQITQQELDTVVK	Protein ERGIC-53 OS=Homo sapiens OX=9606 GN=LMAN1 PE=1 SV=2	P49257	373	0.488942	0.493711	0.468064	0.494179	0.487754	0.49785	0.489535	0.491708	0.507327	LMAN1	LMAN1_M[+16]377	377	LMAN1	T4	OUT
sp|P49257|LMAN1_HUMAN	CPELPPFPSCLSTVHFIIFVVVQTVLFIGYIMYR[+16]SQQEAAAK	Protein ERGIC-53 OS=Homo sapiens OX=9606 GN=LMAN1 PE=1 SV=2	P49257	465	0.0843574	0.141527	0.0247558	0.0672602	0.0264358	0.0978889	0.0768243	0.119093	0.00935292	LMAN1	LMAN1_R[+16]499	499	LMAN1	T4	OUT
sp|P49257|LMAN1_HUMAN	GAGMP[+16]GQHGQITQQELDTVVK	Protein ERGIC-53 OS=Homo sapiens OX=9606 GN=LMAN1 PE=1 SV=2	P49257	373	0.488851	0.493952	0.514738	0.494414	0.4863	0.493812	0.495571	0.501644	0.471071	LMAN1	LMAN1_P[+16]378	378	LMAN1	T4	OUT
sp|P49281|NRAM2_HUMAN	TPQIEQAVGIVGAVIMPH[+16]NMYLHSALVK	Natural resistance-associated macrophage protein 2 OS=Homo sapiens OX=9606 GN=SLC11A2 PE=1 SV=2	P49281	249	0.242958	0.274193	0.201551	0.214144	0.181941	0.235484	0.182761	0.0176206	0.188066	NRAM2	NRAM2_H[+16]267	267	SLC11A2	T4	OUT
sp|P49281|NRAM2_HUMAN	GM[+16]FVPSCSGCR	Natural resistance-associated macrophage protein 2 OS=Homo sapiens OX=9606 GN=SLC11A2 PE=1 SV=2	P49281	238	0.0295299	0.0054484	0.0139295	0.00274477	0.0144568	0.0109183	0.0128888	0.0130234	0.00316621	NRAM2	NRAM2_M[+16]240	240	SLC11A2	T4	OUT
sp|P51148|RAB5C_HUMAN	FEIW[+32]DTAGQER	Ras-related protein Rab-5C OS=Homo sapiens OX=9606 GN=RAB5C PE=1 SV=2	P51148	71	0.00860396	0.00418098	0.047239	0.12717	0.0227963	0.00881324	0.00608556	0.00121061	0.0362681	RAB5C	RAB5C_W[+32]75	75	RAB5C	T4	OUT
sp|P57088|TMM33_HUMAN	F[+16]IACNEIFLMPATVFMLFSGQGSLLQPFIYYR	Transmembrane protein 33 OS=Homo sapiens OX=9606 GN=TMEM33 PE=1 SV=2	P57088	158	0.241294	0.0259641	0.00193842	0.00606735	0.483222	0.40296	0.000806755	0.00183997	0.00170658	TMM33	TMM33_F[+16]159	159	TMEM33	T4	OUT
sp|P62820|RAB1A_HUMAN	NATNVEQSF[+16]MTMAAEIK	Ras-related protein Rab-1A OS=Homo sapiens OX=9606 GN=RAB1A PE=1 SV=3	P62820	156	0.0255228	0.022873	0.00487415	0.0110664	0.0104394	0.0120844	0.0270765	0.0257875	0.0280749	RAB1A	RAB1A_F[+16]165	165	RAB1A	T4	OUT
sp|P62820|RAB1A_HUMAN	NATNVEQSFM[+16]TMAAEIK	Ras-related protein Rab-1A OS=Homo sapiens OX=9606 GN=RAB1A PE=1 SV=3	P62820	156	0.0956525	0.0235522	0.00100646	0.0110934	0.000197904	0.0177725	0.00268722	0.0270197	0.0273692	RAB1A	RAB1A_M[+16]166	166	RAB1A	T4	OUT
sp|P98196|AT11A_HUMAN	EP[+16]PPGAEAYIPQR	Probable phospholipid-transporting ATPase IH OS=Homo sapiens OX=9606 GN=ATP11A PE=1 SV=3	P98196	31	0.278074	0.0650201	0.4562	0.883435	0.373697	0.24438	0.109364	0.600846	0.642188	AT11A	AT11A_P[+16]33	33	ATP11A	T4	L2
sp|Q02978|M2OM_HUMAN	LGPHTVLTFIFLEQM[+16]NK	Mitochondrial 2-oxoglutarate/malate carrier protein OS=Homo sapiens OX=9606 GN=SLC25A11 PE=1 SV=3	Q02978	288	0.0164529	0.00331187	0.00291279	0.0212681	0.00072497	0.00146563	0.0166606	0.0133414	0.0139616	M2OM	M2OM_M[+16]303	303	SLC25A11	T4	OUT
sp|Q12907|LMAN2_HUMAN	EHSLIKPYQGVGSSSMPLW[+16]DFQGSTMLTSQYVR	Vesicular integral-membrane protein VIP36 OS=Homo sapiens OX=9606 GN=LMAN2 PE=1 SV=1	Q12907	56	0.0524743	0.0710102	0.0759115	0.00337395	0.0740246	0.0267674	0.0270471	0.00491728	0.201509	LMAN2	LMAN2_W[+16]75	75	LMAN2	T4	OUT
sp|Q12907|LMAN2_HUMAN	EHSLIKPYQGVGSSSMP[+16]LWDFQGSTMLTSQYVR	Vesicular integral-membrane protein VIP36 OS=Homo sapiens OX=9606 GN=LMAN2 PE=1 SV=1	Q12907	56	0.0164903	0.0127972	0.0115298	0.00242989	0.02228	0.00860242	0.00247478	0.00165178	0.172058	LMAN2	LMAN2_P[+16]73	73	LMAN2	T4	OUT
sp|Q12907|LMAN2_HUMAN	EHSLIK[+16]PYQGVGSSSMPLWDFQGSTMLTSQYVR	Vesicular integral-membrane protein VIP36 OS=Homo sapiens OX=9606 GN=LMAN2 PE=1 SV=1	Q12907	56	0.00945685	0.00225929	0.0132058	0.00229782	0.0361451	0.0432115	0.00632028	0.00117704	0.065052	LMAN2	LMAN2_K[+16]62	62	LMAN2	T4	OUT
sp|Q14108|SCRB2_HUMAN	TLNIPVLTVIEW[+32]SQVHFLR	Lysosome membrane protein 2 OS=Homo sapiens OX=9606 GN=SCARB2 PE=1 SV=2	Q14108	134	0.0048429	0.00275516	0.0571176	0.0200468	0.0371055	0.0196989	0.0184192	0.0310777	0.00701391	SCRB2	SCRB2_W[+32]146	146	SCARB2	T4	OUT
sp|Q14108|SCRB2_HUMAN	FVSAIEGMH[+16]PNQEDHETFVDINPLTGIILK	Lysosome membrane protein 2 OS=Homo sapiens OX=9606 GN=SCARB2 PE=1 SV=2	Q14108	348	0.0051832	0.000292909	0.000103013	0.0161322	0.0177194	0.0255992	0.000512324	9.76375e-05	0.00229096	SCRB2	SCRB2_H[+16]357	357	SCARB2	T4	OUT
sp|Q14108|SCRB2_HUMAN	FVSAIEGMHP[+16]NQEDHETFVDINPLTGIILK	Lysosome membrane protein 2 OS=Homo sapiens OX=9606 GN=SCARB2 PE=1 SV=2	Q14108	348	0.0184733	0.0325818	0.0045594	0.0235343	0.0290933	0.0323097	0.0275404	0.0266815	0.023948	SCRB2	SCRB2_P[+16]358	358	SCARB2	T4	OUT
sp|Q14697|GANAB_HUMAN	M[+16]MDYLQGSGETPQTDVR	Neutral alpha-glucosidase AB OS=Homo sapiens OX=9606 GN=GANAB PE=1 SV=3	Q14697	337	0.0443822	0.0464896	0.0230304	0.0175704	0.0321845	0.0170215	0.0227054	0.00898392	0.00684891	GANAB	GANAB_M[+16]338	338	GANAB	T4	OUT
sp|Q14697|GANAB_HUMAN	MM[+16]DYLQGSGETPQTDVR	Neutral alpha-glucosidase AB OS=Homo sapiens OX=9606 GN=GANAB PE=1 SV=3	Q14697	337	0.0438675	0.0465424	0.0234278	0.0175663	0.0322233	0.0191586	0.0216652	0.0219939	0.0181684	GANAB	GANAB_M[+16]339	339	GANAB	T4	OUT
sp|Q14697|GANAB_HUMAN	LYNLDVF[+16]QYELYNPMALYGSVPVLLAHNPHR	Neutral alpha-glucosidase AB OS=Homo sapiens OX=9606 GN=GANAB PE=1 SV=3	Q14697	278	0.00756757	0.00713736	0.0036481	0.000686205	0.00335236	0.00632847	0.0015474	0.00149374	0.00889675	GANAB	GANAB_F[+16]285	285	GANAB	T4	OUT
sp|Q14697|GANAB_HUMAN	LYNLDVFQYELYNP[+16]MALYGSVPVLLAHNPHR	Neutral alpha-glucosidase AB OS=Homo sapiens OX=9606 GN=GANAB PE=1 SV=3	Q14697	278	0.0447423	0.0416299	0.0214215	0.0403684	0.0274994	0.051286	0.0389092	0.0552014	0.0195529	GANAB	GANAB_P[+16]292	292	GANAB	T4	OUT
sp|Q14697|GANAB_HUMAN	W[+16]MSETGIIDVFLLLGPSISDVFR	Neutral alpha-glucosidase AB OS=Homo sapiens OX=9606 GN=GANAB PE=1 SV=3	Q14697	354	0.623961	0.217124	0.0863789	0.291413	0.253614	0.0911106	0.124587	0.147029	0.427482	GANAB	GANAB_W[+16]355	355	GANAB	T4	OUT
sp|Q15041|AR6P1_HUMAN	STNLLAAETASLEEQLQGWGEVMLM[+16]ADK	ADP-ribosylation factor-like protein 6-interacting protein 1 OS=Homo sapiens OX=9606 GN=ARL6IP1 PE=1 SV=2	Q15041	7	0.104086	0.178687	0.157052	0.120764	0.0816502	0.138257	0.127241	0.131566	0.0743817	AR6P1	AR6P1_M[+16]32	32	ARL6IP1	T4	OUT
sp|Q15041|AR6P1_HUMAN	W[+32]TTEQQQR	ADP-ribosylation factor-like protein 6-interacting protein 1 OS=Homo sapiens OX=9606 GN=ARL6IP1 PE=1 SV=2	Q15041	96	0.0665539	0.0470435	0.0159137	0.0253757	0.00566262	0.00772073	0.0345623	0.0162088	0.0185641	AR6P1	AR6P1_W[+32]97	97	ARL6IP1	T4	OUT
sp|Q15084|PDIA6_HUMAN	EVIQSDSLWLVEFYAP[+16]WCGHCQR	Protein disulfide-isomerase A6 OS=Homo sapiens OX=9606 GN=PDIA6 PE=1 SV=1	Q15084	37	0.461021	0.424412	0.413021	0.309168	0.317451	0.430768	0.392385	0.386375	0.46979	PDIA6	PDIA6_P[+16]53	53	PDIA6	T4	OUT
sp|Q15084|PDIA6_HUMAN	NLEPEW[+32]AAAASEVK	Protein disulfide-isomerase A6 OS=Homo sapiens OX=9606 GN=PDIA6 PE=1 SV=1	Q15084	194	0.00469302	0.00336221	0.00278878	0.0558849	0.0175421	0.0104573	0.00626302	0.0203697	0.0129425	PDIA6	PDIA6_W[+32]200	200	PDIA6	T4	OUT
sp|Q15363|TMED2_HUMAN	GQDM[+16]ETEAHQNKLEEMINELAVAMTAVK	Transmembrane emp24 domain-containing protein 2 OS=Homo sapiens OX=9606 GN=TMED2 PE=1 SV=1	Q15363	117	0.0194583	0.0479388	0.0117859	0.0297028	0.0143343	0.00281182	0.0268922	0.0345304	0.00873655	TMED2	TMED2_M[+16]121	121	TMED2	T4	OUT
sp|Q15363|TMED2_HUMAN	HEQEY[+32]MEVR	Transmembrane emp24 domain-containing protein 2 OS=Homo sapiens OX=9606 GN=TMED2 PE=1 SV=1	Q15363	145	0.01481	0.0165194	0.0204109	0.0180096	0.0191201	0.0187618	0.021013	0.0220937	0.0203943	TMED2	TMED2_Y[+32]150	150	TMED2	T4	OUT
sp|Q15363|TMED2_HUMAN	VVLW[+16]SFFEALVLVAMTLGQIYYLKRFFEVR	Transmembrane emp24 domain-containing protein 2 OS=Homo sapiens OX=9606 GN=TMED2 PE=1 SV=1	Q15363	168	0.0264429	0.0188472	0.0808855	0.0713286	0.0838576	0.0771201	0.0778979	0.103754	0.066719	TMED2	TMED2_W[+16]172	172	TMED2	T4	OUT
sp|Q15363|TMED2_HUMAN	HEQEYM[+32]EVR	Transmembrane emp24 domain-containing protein 2 OS=Homo sapiens OX=9606 GN=TMED2 PE=1 SV=1	Q15363	145	0.0148394	0.0165176	0.0204291	0.0181923	0	0.0001057	0.0210229	0.0251131	0.000215154	TMED2	TMED2_M[+32]151	151	TMED2	T4	OUT
sp|Q15363|TMED2_HUMAN	VVLWSFFEALVLVAM[+16]TLGQIYYLK	Transmembrane emp24 domain-containing protein 2 OS=Homo sapiens OX=9606 GN=TMED2 PE=1 SV=1	Q15363	168	0.522294	0.500049	0.393985	0.517828	0.373888	0.54474	0.600354	0.347942	0.424039	TMED2	TMED2_M[+16]183	183	TMED2	T4	OUT
sp|Q16891|MIC60_HUMAN	QK[+16]GDTPASATAPTEAAQIISAAGDTLSVPAPAVQPEESLK	MICOS complex subunit MIC60 OS=Homo sapiens OX=9606 GN=IMMT PE=1 SV=1	Q16891	130	0.154867	0.19169	0.231222	0.2703	0.220446	0.255381	0.230914	0.0880709	0.254968	MIC60	MIC60_K[+16]132	132	IMMT	T4	OUT
sp|Q4KMQ2|ANO6_HUMAN	AIWNNIQEVLLPWIM[+16]NLIGR	Anoctamin-6 OS=Homo sapiens OX=9606 GN=ANO6 PE=1 SV=2	Q4KMQ2	615	0.660625	0.906116	0.894884	0.832618	0.851582	0.607158	0.610085	0.693012	0.590812	ANO6	ANO6_M[+16]630	630	ANO6	T4	OUT
sp|Q4KMQ2|ANO6_HUMAN	YLTPQTATSITASIISFIIIMILNTIYEKVAIM[+16]ITNFELPR	Anoctamin-6 OS=Homo sapiens OX=9606 GN=ANO6 PE=1 SV=2	Q4KMQ2	500	0.53399	0.488331	0.478561	0.379676	0.194046	0.667858	0.624657	0.160135	0.332151	ANO6	ANO6_M[+16]533	533	ANO6	T4	OUT
sp|Q4KMQ2|ANO6_HUMAN	YLTPQTATSITASIISFIIIMILNTIYEKVAIM[+32]ITNFELPR	Anoctamin-6 OS=Homo sapiens OX=9606 GN=ANO6 PE=1 SV=2	Q4KMQ2	500	0.0154457	0.114235	0.0224587	0.0434963	0.0711254	0.0145573	0.0350932	0.0182366	0.00258508	ANO6	ANO6_M[+32]533	533	ANO6	T4	OUT
sp|Q53GQ0|DHB12_HUMAN	GAILNISSGSGM[+16]LPVPLLTIYSATK	Very-long-chain 3-oxoacyl-CoA reductase OS=Homo sapiens OX=9606 GN=HSD17B12 PE=1 SV=2	Q53GQ0	181	0.092127	0.0932377	0.06389	0.0836812	0.0895861	0.094322	0.0620984	0.106578	0.0774645	DHB12	DHB12_M[+16]193	193	HSD17B12	T4	OUT
sp|Q5BJD5|TM41B_HUMAN	SWVEAGSAR[+16]MSLLILVSIFLSAAFVMFLVYKNFPQLSEEER	Transmembrane protein 41B OS=Homo sapiens OX=9606 GN=TMEM41B PE=1 SV=1	Q5BJD5	42	0.309136	0.339647	0.168772	0.722786	0.34664	0.282526	0.830485	0.312677	0.742157	TM41B	TM41B_R[+16]51	51	TMEM41B	T4	L1
sp|Q5BJD5|TM41B_HUMAN	SWVEAGSARM[+16]SLLILVSIFLSAAFVMFLVYKNFPQLSEEER	Transmembrane protein 41B OS=Homo sapiens OX=9606 GN=TMEM41B PE=1 SV=1	Q5BJD5	42	0.586626	0.54417	0.743819	0.206031	0.457399	0.435004	0.145208	0.403377	0.0914995	TM41B	TM41B_M[+16]52	52	TMEM41B	T4	L1
sp|Q5JPE7|NOMO2_HUMAN	AGLTLKPQTFPLTVTDRPVMDVAFVQF[+32]LASVSGK	Nodal modulator 2 OS=Homo sapiens OX=9606 GN=NOMO2 PE=1 SV=1	Q5JPE7	474	0.015063	0.00980006	0.00714225	0.000288427	0.00771833	0.00497756	0.061958	0.00295569	0.0258455	NOMO2	NOMO2_F[+32]501	501	NOMO2	T4	L2
sp|Q5JPE7|NOMO2_HUMAN	AGLTLKPQTFPLTVTDRPVM[+32]DVAFVQFLASVSGK	Nodal modulator 2 OS=Homo sapiens OX=9606 GN=NOMO2 PE=1 SV=1	Q5JPE7	474	0.188084	0.258345	0.161636	0.28785	0.294538	0.296987	0.360843	0.334431	0.0748972	NOMO2	NOMO2_M[+32]494	494	NOMO2	T4	L2
sp|Q6DD88|ATLA3_HUMAN	SM[+16]LQATAEANNLAAAASAK	Atlastin-3 OS=Homo sapiens OX=9606 GN=ATL3 PE=1 SV=1	Q6DD88	341	0.107302	0.107159	0.0757564	0.145789	0.0651572	0.0546633	0.0705582	0.00439454	0.0649028	ATLA3	ATLA3_M[+16]343	343	ATL3	T4	L1
sp|Q7Z7H5|TMED4_HUMAN	VLWWSIAQTVILILTGIW[+16]QMR	Transmembrane emp24 domain-containing protein 4 OS=Homo sapiens OX=9606 GN=TMED4 PE=1 SV=1	Q7Z7H5	194	0.450394	0.441255	0.40515	0.488425	0.420737	0.389035	0.020091	0.389532	0.424778	TMED4	TMED4_W[+16]212	212	TMED4	T4	OUT
sp|Q7Z7H5|TMED4_HUMAN	VLWWSIAQTVILILTGIWQM[+16]R	Transmembrane emp24 domain-containing protein 4 OS=Homo sapiens OX=9606 GN=TMED4 PE=1 SV=1	Q7Z7H5	194	0.451591	0.44227	0.40445	0.494184	0.361691	0.391556	0.795897	0.393979	0.431172	TMED4	TMED4_M[+16]214	214	TMED4	T4	OUT
sp|Q8IZ81|ELMD2_HUMAN	GM[+16]GILGLINLVYFSENYTSEAHQILSR	ELMO domain-containing protein 2 OS=Homo sapiens OX=9606 GN=ELMOD2 PE=1 SV=1	Q8IZ81	167	0.278892	0.269221	0.114869	0.152888	0.01706	0.106087	0.0838533	0.170847	0.177488	ELMD2	ELMD2_M[+16]169	169	ELMOD2	T4	OUT
sp|Q8N2K0|ABD12_HUMAN	DQM[+16]WYEDALASSHPIILYLHGNAGTR	Lysophosphatidylserine lipase ABHD12 OS=Homo sapiens OX=9606 GN=ABHD12 PE=1 SV=2	Q8N2K0	155	0.0354857	0.0171681	0.0304372	0.0224805	0.0294059	0.0268757	0.0543738	0.003318	0.0181946	ABD12	ABD12_M[+16]158	158	ABHD12	T4	L2
sp|Q8N2K0|ABD12_HUMAN	Y[+32]FPGFDWFFLDPITSSGIK	Lysophosphatidylserine lipase ABHD12 OS=Homo sapiens OX=9606 GN=ABHD12 PE=1 SV=2	Q8N2K0	292	2.61457e-05	0.000423248	0.0448115	0.0401162	0.0465974	0.0195241	0.0531496	0.0924257	0.0269718	ABD12	ABD12_Y[+32]293	293	ABHD12	T4	L2
sp|Q8NI27|THOC2_HUMAN	ECGNY[+16]PGFLTILR	THO complex subunit 2 OS=Homo sapiens OX=9606 GN=THOC2 PE=1 SV=2	Q8NI27	1062	0.817515	0.254416	0.111545	0.13921	0.311919	0.38634	0.456066	0.303269	0.382004	THOC2	THOC2_Y[+16]1067	1067	THOC2	T4	OUT
sp|Q8TC12|RDH11_HUMAN	M[+32]VELMFPLLLLLLPFLLYMAAPQIR	Retinol dehydrogenase 11 OS=Homo sapiens OX=9606 GN=RDH11 PE=1 SV=2	Q8TC12	0	0.220185	0.14489	0.387253	0.428333	0.397401	0.387044	0.406147	0.408635	0.104834	RDH11	RDH11_M[+32]1	1	RDH11	T4	OUT
sp|Q8TC12|RDH11_HUMAN	MVELMF[+32]PLLLLLLPFLLYMAAPQIR	Retinol dehydrogenase 11 OS=Homo sapiens OX=9606 GN=RDH11 PE=1 SV=2	Q8TC12	0	0.220363	0.148853	0.388597	0.424381	0.402462	0.389259	0.416639	0.408637	0.00920726	RDH11	RDH11_F[+32]6	6	RDH11	T4	OUT
sp|Q8TC12|RDH11_HUMAN	MVELMFPLLLLLLPFLLY[+16]MAAPQIR	Retinol dehydrogenase 11 OS=Homo sapiens OX=9606 GN=RDH11 PE=1 SV=2	Q8TC12	0	0.152206	0.408555	0.0447425	0.0402928	0.0491889	0.0450661	0.0420595	0.0463598	0.193945	RDH11	RDH11_Y[+16]18	18	RDH11	T4	OUT
sp|Q8TC12|RDH11_HUMAN	M[+16]VELMFPLLLLLLPFLLYMAAPQIR	Retinol dehydrogenase 11 OS=Homo sapiens OX=9606 GN=RDH11 PE=1 SV=2	Q8TC12	0	0.246836	0.00942372	0.0858356	0.0593873	0.0657675	0.0793866	0.0534323	0.0588626	0.256444	RDH11	RDH11_M[+16]1	1	RDH11	T4	OUT
sp|Q8TC12|RDH11_HUMAN	MVELMFPLLLLLLPFLLYM[+16]AAPQIR	Retinol dehydrogenase 11 OS=Homo sapiens OX=9606 GN=RDH11 PE=1 SV=2	Q8TC12	0	0.154631	0.274249	0.0460092	0.0419291	0.0457225	0.0574861	0.0418219	0.0379142	0.244262	RDH11	RDH11_M[+16]19	19	RDH11	T4	OUT
sp|Q92504|S39A7_HUMAN	EASPLQSLLEVLGLLGGVIM[+16]MVLIAHLE	Zinc transporter SLC39A7 OS=Homo sapiens OX=9606 GN=SLC39A7 PE=1 SV=2	Q92504	441	0.152352	0.105577	0.0396564	0.0011455	0.0186239	0.0653125	0.284534	0.0266574	0.0478434	S39A7	S39A7_M[+16]461	461	SLC39A7	T4	OUT
sp|Q92504|S39A7_HUMAN	EASPLQSLLEVLGLLGGVIMM[+16]VLIAHLE	Zinc transporter SLC39A7 OS=Homo sapiens OX=9606 GN=SLC39A7 PE=1 SV=2	Q92504	441	0.0137933	0.0204092	0.0215495	0.00806283	0.0207005	0.0209408	0.00193866	0.0261924	0.0141841	S39A7	S39A7_M[+16]462	462	SLC39A7	T4	OUT
sp|Q92597|NDRG1_HUMAN	QHIVNDM[+16]NPGNLHLFINAYNSR	Protein NDRG1 OS=Homo sapiens OX=9606 GN=NDRG1 PE=1 SV=1	Q92597	212	0.00877856	0.00242032	0.133936	0.0173851	0.15631	0.136259	0.00982974	0.260117	0.0676628	NDRG1	NDRG1_M[+16]219	219	NDRG1	T4	OUT
sp|Q96A33|CCD47_HUMAN	ELLESNF[+16]TLVGDDGTNK	Coiled-coil domain-containing protein 47 OS=Homo sapiens OX=9606 GN=CCDC47 PE=1 SV=1	Q96A33	172	0.334955	0.329822	0.346905	0.522776	0.334335	0.0110482	0.412936	0.427658	0.406775	CCD47	CCD47_F[+16]179	179	CCDC47	T4	OUT
sp|Q96AA3|RFT1_HUMAN	YVMTF[+16]LNVLNFGDQGVYDIVNNLGSLVAR	Protein RFT1 homolog OS=Homo sapiens OX=9606 GN=RFT1 PE=1 SV=1	Q96AA3	261	0.0965253	0.165206	0.0172846	0.00441625	0.0289997	0.012745	0.00749005	0.0217697	0.0197663	RFT1	RFT1_F[+16]266	266	RFT1	T4	OUT
sp|Q96AA3|RFT1_HUMAN	Y[+16]VMTFLNVLNFGDQGVYDIVNNLGSLVAR	Protein RFT1 homolog OS=Homo sapiens OX=9606 GN=RFT1 PE=1 SV=1	Q96AA3	261	0.0421597	0.117526	0.207927	0.131222	0.125994	0.123967	0.132302	0.108963	0.0582283	RFT1	RFT1_Y[+16]262	262	RFT1	T4	OUT
sp|Q96AA3|RFT1_HUMAN	YVM[+16]TFLNVLNFGDQGVYDIVNNLGSLVAR	Protein RFT1 homolog OS=Homo sapiens OX=9606 GN=RFT1 PE=1 SV=1	Q96AA3	261	0.0148253	0.0540815	0.197825	0.128679	0.125399	0.125379	0.131356	0.0814107	0.175456	RFT1	RFT1_M[+16]264	264	RFT1	T4	OUT
sp|Q96N66|MBOA7_HUMAN	M[+16]SPEEWTYLVVLLISIPIGFLFK	Lysophospholipid acyltransferase 7 OS=Homo sapiens OX=9606 GN=MBOAT7 PE=1 SV=2	Q96N66	0	0.0326449	0.54553	0.0440063	0.0717549	0.0986111	0.0756237	0.0328926	0.0798335	0.0305906	MBOA7	MBOA7_M[+16]1	1	MBOAT7	T4	OUT
sp|Q96SQ9|CP2S1_HUMAN	M[+16]EATGTWALLLALALLLLLTLALSGTR	Cytochrome P450 2S1 OS=Homo sapiens OX=9606 GN=CYP2S1 PE=1 SV=2	Q96SQ9	0	0.946317	0.950196	0.753463	0.905114	0.659578	0.914706	0.93781	0.747151	0.77665	CP2S1	CP2S1_M[+16]1	1	CYP2S1	T4	OUT
sp|Q96SQ9|CP2S1_HUMAN	GHLPPGPTPLPLLGNLLQLRP[+16]GALYSGLMR	Cytochrome P450 2S1 OS=Homo sapiens OX=9606 GN=CYP2S1 PE=1 SV=2	Q96SQ9	29	0.219014	0.0879148	0.0991779	0.148293	0.114235	0.104331	0.110247	0.152295	0.132397	CP2S1	CP2S1_P[+16]50	50	CYP2S1	T4	OUT
sp|Q96SQ9|CP2S1_HUMAN	LLALVPM[+16]GIPR	Cytochrome P450 2S1 OS=Homo sapiens OX=9606 GN=CYP2S1 PE=1 SV=2	Q96SQ9	362	0.0781004	0.0628134	0.065731	0.0446167	0.05374	0.0794261	0.043662	0.036872	0.0777991	CP2S1	CP2S1_M[+16]369	369	CYP2S1	T4	OUT
sp|Q96SQ9|CP2S1_HUMAN	M[+32]EATGTWALLLALALLLLLTLALSGTR	Cytochrome P450 2S1 OS=Homo sapiens OX=9606 GN=CYP2S1 PE=1 SV=2	Q96SQ9	0	0.00433856	0.0465049	0.0315249	0.00408958	0.0250267	0.0191558	2.35445e-06	0.00170979	0.028273	CP2S1	CP2S1_M[+32]1	1	CYP2S1	T4	OUT
sp|Q96SQ9|CP2S1_HUMAN	MEATGTW[+32]ALLLALALLLLLTLALSGTR	Cytochrome P450 2S1 OS=Homo sapiens OX=9606 GN=CYP2S1 PE=1 SV=2	Q96SQ9	0	0.0403051	0.00328386	0.00314103	0.00434596	0.115755	0.00516337	0.00125237	0.0196553	0.00363196	CP2S1	CP2S1_W[+32]7	7	CYP2S1	T4	OUT
sp|Q99720|SGMR1_HUMAN	SEVFYPGETVVHGPGEATAVEWGP[+16]NTWMVEYGR	Sigma non-opioid intracellular receptor 1 OS=Homo sapiens OX=9606 GN=SIGMAR1 PE=1 SV=1	Q99720	142	0.0491551	0.0822329	0.0953004	0.00758347	0.0753631	0.0528621	0.146446	0.0544296	0.160684	SGMR1	SGMR1_P[+16]166	166	SIGMAR1	T4	OUT
sp|Q99720|SGMR1_HUMAN	SEVFY[+32]PGETVVHGPGEATAVEWGPNTWMVEYGR	Sigma non-opioid intracellular receptor 1 OS=Homo sapiens OX=9606 GN=SIGMAR1 PE=1 SV=1	Q99720	142	0.0140481	0.000467726	0.021368	0.0207982	0.0251289	0.0194517	0.00835458	0.0140283	0.02339	SGMR1	SGMR1_Y[+32]147	147	SIGMAR1	T4	OUT
sp|Q99720|SGMR1_HUMAN	SEVFYPGETVVHGPGEATAVEW[+32]GPNTWMVEYGR	Sigma non-opioid intracellular receptor 1 OS=Homo sapiens OX=9606 GN=SIGMAR1 PE=1 SV=1	Q99720	142	0.0140406	0.0247252	0.0209886	0.0206564	0.0251588	0.0194823	0.00831528	0.0140283	0.0233844	SGMR1	SGMR1_W[+32]164	164	SIGMAR1	T4	OUT
sp|Q9BSJ8|ESYT1_HUMAN	VILEPLIGDLPFVGAVSM[+16]FFIR	Extended synaptotagmin-1 OS=Homo sapiens OX=9606 GN=ESYT1 PE=1 SV=1	Q9BSJ8	244	0.0271377	0.189582	0.0534472	0.181635	0.0462541	0.026323	0.0730578	0.0410141	0.0301954	ESYT1	ESYT1_M[+16]262	262	ESYT1	T4	L1
sp|Q9BSJ8|ESYT1_HUMAN	VILEPLIGDLPFVGAVSMF[+16]FIR	Extended synaptotagmin-1 OS=Homo sapiens OX=9606 GN=ESYT1 PE=1 SV=1	Q9BSJ8	244	0.0102116	0.216271	0.0474006	0.180919	0.022469	0.0296759	0.0617454	0.017278	0.0431986	ESYT1	ESYT1_F[+16]263	263	ESYT1	T4	L1
sp|Q9BVC6|TM109_HUMAN	RDFAPP[+16]GQQK	Transmembrane protein 109 OS=Homo sapiens OX=9606 GN=TMEM109 PE=1 SV=1	Q9BVC6	36	0.335391	0.375794	0.286953	0.262284	0.0721224	0.32936	0.347365	0.300823	0.248422	TM109	TM109_P[+16]42	42	TMEM109	T4	OUT
sp|Q9BVK6|TMED9_HUMAN	VLWWSILQTLILVAIGVWQM[+16]R	Transmembrane emp24 domain-containing protein 9 OS=Homo sapiens OX=9606 GN=TMED9 PE=1 SV=2	Q9BVK6	202	0.467012	0.476314	0.396817	0.464903	0.363651	0.41982	0.335104	0.380979	0.421182	TMED9	TMED9_M[+16]222	222	TMED9	T4	OUT
sp|Q9BVK6|TMED9_HUMAN	VLWWSILQTLILVAIGVW[+16]QMR	Transmembrane emp24 domain-containing protein 9 OS=Homo sapiens OX=9606 GN=TMED9 PE=1 SV=2	Q9BVK6	202	0.466793	0.484046	0.441319	0.464131	0.348576	0.455705	0.46498	0.406569	0.395565	TMED9	TMED9_W[+16]220	220	TMED9	T4	OUT
sp|Q9BW60|ELOV1_HUMAN	IQGYPLM[+16]GSPLLMTSILLTYVYFVLSLGPR	Elongation of very long chain fatty acids protein 1 OS=Homo sapiens OX=9606 GN=ELOVL1 PE=1 SV=1	Q9BW60	18	0.00231491	0.357317	0.294289	0.32111	0.565512	0.256992	0.382584	0.315055	0.281861	ELOV1	ELOV1_M[+16]25	25	ELOVL1	T4	L1
sp|Q9BW60|ELOV1_HUMAN	IQGYPLM[+32]GSPLLMTSILLTYVYFVLSLGPR	Elongation of very long chain fatty acids protein 1 OS=Homo sapiens OX=9606 GN=ELOVL1 PE=1 SV=1	Q9BW60	18	0.0014502	0.112798	0.0349568	0.0197405	0.0794397	0.174468	0.00499359	0.00420667	0.00366938	ELOV1	ELOV1_M[+32]25	25	ELOVL1	T4	L1
sp|Q9BW60|ELOV1_HUMAN	IQGYPLMGSPLLM[+32]TSILLTYVYFVLSLGPR	Elongation of very long chain fatty acids protein 1 OS=Homo sapiens OX=9606 GN=ELOVL1 PE=1 SV=1	Q9BW60	18	0.000587413	0.152346	0.0164842	0.0310079	0.0565684	0.00293034	0.0296117	0.0239543	0.0325405	ELOV1	ELOV1_M[+32]31	31	ELOVL1	T4	L1
sp|Q9GZU7|CTDS1_HUMAN	VLILDNSPASYVFHP[+16]DNAVPVASWFDNMSDTELHDLLPFFEQLSR	Carboxy-terminal domain RNA polymerase II polypeptide A small phosphatase 1 OS=Homo sapiens OX=9606 GN=CTDSP1 PE=1 SV=1	Q9GZU7	201	0.644244	0.0236399	0.128073	0.0678955	0.175957	0.237861	0.0574885	0.0991425	0.0937524	CTDS1	CTDS1_P[+16]216	216	CTDSP1	T4	OUT
sp|Q9GZU7|CTDS1_HUMAN	VLILDNSPASYVFHPDNAVPVASWF[+16]DNMSDTELHDLLPFFEQLSR	Carboxy-terminal domain RNA polymerase II polypeptide A small phosphatase 1 OS=Homo sapiens OX=9606 GN=CTDSP1 PE=1 SV=1	Q9GZU7	201	0	0.758495	0.00566434	0.0658874	0	0.239717	0.0634236	0.0606234	0.00176026	CTDS1	CTDS1_F[+16]226	226	CTDSP1	T4	OUT
sp|Q9H3H5|GPT_HUMAN	MW[+16]AFSELPMPLLINLIVSLLGFVATVTLIPAFR	UDP-N-acetylglucosamine--dolichyl-phosphate N-acetylglucosaminephosphotransferase OS=Homo sapiens OX=9606 GN=DPAGT1 PE=1 SV=2	Q9H3H5	0	0.729573	0.429373	0.420162	0.297129	0.421431	0.483955	0.375345	0.421693	0.429398	GPT	GPT_W[+16]2	2	DPAGT1	T4	OUT
sp|Q9H3H5|GPT_HUMAN	MWAFSELPM[+32]PLLINLIVSLLGFVATVTLIPAFR	UDP-N-acetylglucosamine--dolichyl-phosphate N-acetylglucosaminephosphotransferase OS=Homo sapiens OX=9606 GN=DPAGT1 PE=1 SV=2	Q9H3H5	0	0.0479774	0.2999	0.00766859	0.0075027	0.0109474	0.0026586	0	0.0033823	0.00581951	GPT	GPT_M[+32]9	9	DPAGT1	T4	OUT
sp|Q9H3H5|GPT_HUMAN	M[+16]WAFSELPMPLLINLIVSLLGFVATVTLIPAFR	UDP-N-acetylglucosamine--dolichyl-phosphate N-acetylglucosaminephosphotransferase OS=Homo sapiens OX=9606 GN=DPAGT1 PE=1 SV=2	Q9H3H5	0	0.00103192	0.00234895	0.294645	0.304936	0.318333	0.354266	0.445284	0.313685	0.30537	GPT	GPT_M[+16]1	1	DPAGT1	T4	OUT
sp|Q9H3H5|GPT_HUMAN	M[+32]WAFSELPMPLLINLIVSLLGFVATVTLIPAFR	UDP-N-acetylglucosamine--dolichyl-phosphate N-acetylglucosaminephosphotransferase OS=Homo sapiens OX=9606 GN=DPAGT1 PE=1 SV=2	Q9H3H5	0	0.0129238	0.00117595	0.122564	0.34226	0.158109	0.0122314	0.124333	0.0796037	0.157815	GPT	GPT_M[+32]1	1	DPAGT1	T4	OUT
sp|Q9H4M9|EHD1_HUMAN	F[+16]MCAQLPNPVLDSISIIDTPGILSGEK	EH domain-containing protein 1 OS=Homo sapiens OX=9606 GN=EHD1 PE=1 SV=2	Q9H4M9	135	0.0151016	0.0982052	0.0873713	0.0647068	0.0908264	0.158337	0.0268326	0.0641972	0.162479	EHD1	EHD1_F[+16]136	136	EHD1	T4	OUT
sp|Q9H9B4|SFXN1_HUMAN	QAITQVVVSRILMAAP[+16]GMAIPPFIMNTLEK	Sideroflexin-1 OS=Homo sapiens OX=9606 GN=SFXN1 PE=1 SV=4	Q9H9B4	223	0.366914	0.932956	0.179655	0.327757	0.125661	0.264612	0.212473	0.0800631	0.205765	SFXN1	SFXN1_P[+16]239	239	SFXN1	T4	OUT
sp|Q9H9B4|SFXN1_HUMAN	ILMAAPGM[+16]AIPPFIMNTLEK	Sideroflexin-1 OS=Homo sapiens OX=9606 GN=SFXN1 PE=1 SV=4	Q9H9B4	233	0.0126596	0.0371563	0.0153584	0.0109392	0.00893984	0.00242036	0.00483996	0.0119116	0.0321718	SFXN1	SFXN1_M[+16]241	241	SFXN1	T4	OUT
sp|Q9HD20|AT131_HUMAN	EVTP[+16]VSSIPVETHR	Manganese-transporting ATPase 13A1 OS=Homo sapiens OX=9606 GN=ATP13A1 PE=1 SV=2	Q9HD20	555	0.0197929	0.0205213	0.0505286	0.164179	0.107033	0.105079	0.132563	0.058551	0.0715082	AT131	AT131_P[+16]559	559	ATP13A1	T4	OUT
sp|Q9NS69|TOM22_HUMAN	LWGLTEM[+16]FPER	Mitochondrial import receptor subunit TOM22 homolog OS=Homo sapiens OX=9606 GN=TOMM22 PE=1 SV=3	Q9NS69	47	0.0232493	0.0292142	0.0140698	0.00943949	0.0227204	0.00684188	0.00643359	0.0208042	0.0301523	TOM22	TOM22_M[+16]54	54	TOMM22	T4	OUT
sp|Q9NS69|TOM22_HUMAN	LQM[+16]EQQQQLQQR	Mitochondrial import receptor subunit TOM22 homolog OS=Homo sapiens OX=9606 GN=TOMM22 PE=1 SV=3	Q9NS69	105	0.00105415	0.00548131	0.00425561	0.00212804	0.000134109	0.000259812	0.00505322	0.00189477	0.00292716	TOM22	TOM22_M[+16]108	108	TOMM22	T4	OUT
sp|Q9NZ01|TECR_HUMAN	THPQW[+32]YPAR	Very-long-chain enoyl-CoA reductase OS=Homo sapiens OX=9606 GN=TECR PE=1 SV=1	Q9NZ01	38	0.0842999	0.0639292	0.0836481	0.0466172	0.104693	0.0479815	0.00180006	0.0600582	0.0324674	TECR	TECR_W[+32]43	43	TECR	T4	OUT
sp|Q9NZ01|TECR_HUMAN	THPQWY[+32]PAR	Very-long-chain enoyl-CoA reductase OS=Homo sapiens OX=9606 GN=TECR PE=1 SV=1	Q9NZ01	38	0.0655757	0.0272622	0.00294953	0.000627039	0.013062	0.0490193	0.000783321	0.00164852	0.00381339	TECR	TECR_Y[+32]44	44	TECR	T4	OUT
sp|Q9P0L0|VAPA_HUMAN	F[+16]MVQTIFAPPNTSDMEAVWK	Vesicle-associated membrane protein-associated protein A OS=Homo sapiens OX=9606 GN=VAPA PE=1 SV=3	Q9P0L0	94	0.0311102	0.0465146	0.0213838	0.0241911	0.0225221	0.0564705	0.0284451	0.0299912	0.0229931	VAPA	VAPA_F[+16]95	95	VAPA	T4	OUT
sp|Q9P0L0|VAPA_HUMAN	QDGP[+16]MPKPHSVSLNDTETR	Vesicle-associated membrane protein-associated protein A OS=Homo sapiens OX=9606 GN=VAPA PE=1 SV=3	Q9P0L0	154	0.0203188	0.000513254	2.15352e-05	0.00330709	0.0154928	0.00278869	0.0057898	0.00206777	0.00545463	VAPA	VAPA_P[+16]158	158	VAPA	T4	OUT
sp|Q9P2E9|RRBP1_HUMAN	AM[+16]EALATAEQACK	Ribosome-binding protein 1 OS=Homo sapiens OX=9606 GN=RRBP1 PE=1 SV=5	Q9P2E9	1026	0.0687789	0.0333987	0.658961	0.0095481	0.0791725	0.0927429	0.00119198	0.11406	0.0830367	RRBP1	RRBP1_M[+16]1028	1028	RRBP1	T4	L1
sp|Q9P2E9|RRBP1_HUMAN	QLCLIEAQTM[+16]EALLALLPELSVLAQQNYTEWLQDLK	Ribosome-binding protein 1 OS=Homo sapiens OX=9606 GN=RRBP1 PE=1 SV=5	Q9P2E9	1054	0.0399549	0.377639	0.00604698	0.0284384	0.0273324	0.0353792	0.024721	0.0364325	0.0401787	RRBP1	RRBP1_M[+16]1064	1064	RRBP1	T4	L1
sp|Q9P2E9|RRBP1_HUMAN	HMAAASAECQNY[+32]AK	Ribosome-binding protein 1 OS=Homo sapiens OX=9606 GN=RRBP1 PE=1 SV=5	Q9P2E9	1207	0.00529112	0.00545904	0.00302995	0.0264755	0.0432044	0.0460943	0.00986312	0.0341554	0.0505479	RRBP1	RRBP1_Y[+32]1219	1219	RRBP1	T4	L1
sp|Q9P2E9|RRBP1_HUMAN	QLCLIEAQTMEALLALLPELSVLAQQNY[+32]TEWLQDLK	Ribosome-binding protein 1 OS=Homo sapiens OX=9606 GN=RRBP1 PE=1 SV=5	Q9P2E9	1054	0.0169902	0.0109362	0.00755942	0.0389134	0.00938774	0.00829583	0.00384516	0.000987944	0.0231485	RRBP1	RRBP1_Y[+32]1082	1082	RRBP1	T4	L1
sp|Q9UBV2|SE1L1_HUMAN	DMF[+16]TQLDMDQLLGPEWDLYLMTIIALLLGTVIAYR	Protein sel-1 homolog 1 OS=Homo sapiens OX=9606 GN=SEL1L PE=1 SV=3	Q9UBV2	727	0.00356256	0.00200803	0.0311062	0.0830991	0.005027	0.014951	0.107097	0.0629373	0.0358548	SE1L1	SE1L1_F[+16]730	730	SEL1L	T4	OUT
sp|Q9UBV2|SE1L1_HUMAN	DM[+16]FTQLDMDQLLGPEWDLYLMTIIALLLGTVIAYR	Protein sel-1 homolog 1 OS=Homo sapiens OX=9606 GN=SEL1L PE=1 SV=3	Q9UBV2	727	0.400584	0.313544	0.203177	0.238941	0.217896	0.315449	0.0488403	0.117312	0.316965	SE1L1	SE1L1_M[+16]729	729	SEL1L	T4	OUT
sp|Q9UGT4|SUSD2_HUMAN	TGGLEVLLNQEVLSFTEQSW[+16]MDLK	Sushi domain-containing protein 2 OS=Homo sapiens OX=9606 GN=SUSD2 PE=1 SV=1	Q9UGT4	523	0.0137481	0.0396236	0.156552	0.0793285	0.0813613	0.089287	0.0830896	0.0874159	0.236042	SUSD2	SUSD2_W[+16]543	543	SUSD2	T4	OUT
sp|Q9UGT4|SUSD2_HUMAN	TGGLEVLLNQEVLSFTEQSWM[+16]DLK	Sushi domain-containing protein 2 OS=Homo sapiens OX=9606 GN=SUSD2 PE=1 SV=1	Q9UGT4	523	0.151326	0.133434	0.152662	0.101434	0.0845094	0.0850811	0.0801212	0.0862604	0.231301	SUSD2	SUSD2_M[+16]544	544	SUSD2	T4	OUT
sp|Q9UJS0|CMC2_HUMAN	FGQVTP[+16]MEVDILFQLADLYEPR	Calcium-binding mitochondrial carrier protein Aralar2 OS=Homo sapiens OX=9606 GN=SLC25A13 PE=1 SV=2	Q9UJS0	260	0.0400211	0.159854	0.0320704	0.0204128	0.0318028	0.0295155	0.0241149	0.0288615	0.0387451	CMC2	CMC2_P[+16]266	266	SLC25A13	T4	OUT
sp|Q9UJS0|CMC2_HUMAN	FGQVTPM[+16]EVDILFQLADLYEPR	Calcium-binding mitochondrial carrier protein Aralar2 OS=Homo sapiens OX=9606 GN=SLC25A13 PE=1 SV=2	Q9UJS0	260	0.0746628	0.159396	0.01652	0.0016928	0.00577552	0.00346001	0.00405854	0.00202845	0.0390947	CMC2	CMC2_M[+16]267	267	SLC25A13	T4	OUT
sp|Q9UJS0|CMC2_HUMAN	QVFGQTTIHQHIP[+16]FNWDSEFVQLHFGK	Calcium-binding mitochondrial carrier protein Aralar2 OS=Homo sapiens OX=9606 GN=SLC25A13 PE=1 SV=2	Q9UJS0	113	0.00080863	0.00958048	0.00344064	0.035413	0.0151871	0.0607636	0.0261487	0.0437932	0.0024854	CMC2	CMC2_P[+16]126	126	SLC25A13	T4	OUT
sp|Q9UJS0|CMC2_HUMAN	ASFANEDGQVSPGSLLLAGAIAGM[+16]PAASLVTPADVIK	Calcium-binding mitochondrial carrier protein Aralar2 OS=Homo sapiens OX=9606 GN=SLC25A13 PE=1 SV=2	Q9UJS0	508	0.0173523	0.00870221	0.0168644	0.00496167	0.0084525	0.018295	0.00163348	0.00101236	0.0297743	CMC2	CMC2_M[+16]532	532	SLC25A13	T4	OUT
sp|Q9Y241|HIG1A_HUMAN	M[+16]SIHLIHMR	HIG1 domain family member 1A, mitochondrial OS=Homo sapiens OX=9606 GN=HIGD1A PE=1 SV=1	Q9Y241	55	0.0969847	0.0257591	0.000130169	0.413781	0.00584275	0.000104467	0.0252077	0.466314	0.00267228	HIG1A	HIG1A_M[+16]56	56	HIGD1A	T4	OUT
sp|Q9Y241|HIG1A_HUMAN	EAP[+16]FVPVGIAGFAAIVAYGLYK	HIG1 domain family member 1A, mitochondrial OS=Homo sapiens OX=9606 GN=HIGD1A PE=1 SV=1	Q9Y241	25	0.000274144	6.79506e-05	0.00276106	0.000567457	0.000489674	0.000251009	0.000272353	0.000341728	0.00107816	HIG1A	HIG1A_P[+16]28	28	HIGD1A	T4	OUT
sp|Q9Y282|ERGI3_HUMAN	TCGGATVTIVSGLLMLLLFLSELQY[+16]YLTTEVHPELYVDK	Endoplasmic reticulum-Golgi intermediate compartment protein 3 OS=Homo sapiens OX=9606 GN=ERGIC3 PE=1 SV=1	Q9Y282	23	0.10999	0.0111157	0.0767454	0.135408	0.0769911	0.130907	0.101029	0.137125	0.177637	ERGI3	ERGI3_Y[+16]48	48	ERGIC3	T4	OUT
sp|Q9Y4P3|TBL2_HUMAN	MELSQM[+16]SELMGLSVLLGLLALMATAAVAR	Transducin beta-like protein 2 OS=Homo sapiens OX=9606 GN=TBL2 PE=1 SV=1	Q9Y4P3	0	0.177087	0.147034	0.0951975	0.161499	0.0983151	0.106323	0.105858	0.164502	0.0893464	TBL2	TBL2_M[+16]6	6	TBL2	T4	OUT
sp|Q9Y4P3|TBL2_HUMAN	MELSQM[+32]SELMGLSVLLGLLALMATAAVAR	Transducin beta-like protein 2 OS=Homo sapiens OX=9606 GN=TBL2 PE=1 SV=1	Q9Y4P3	0	0.00212773	0.00621943	0.112236	0.128414	0.120119	0.17108	0.102268	0.113117	0.124364	TBL2	TBL2_M[+32]6	6	TBL2	T4	OUT
sp|Q9Y4P3|TBL2_HUMAN	MELSQMSELM[+16]GLSVLLGLLALMATAAVAR	Transducin beta-like protein 2 OS=Homo sapiens OX=9606 GN=TBL2 PE=1 SV=1	Q9Y4P3	0	0.129052	0.144123	0.116327	0.0641437	0.0920267	0.10693	0.0620631	0.0933603	0.0953206	TBL2	TBL2_M[+16]10	10	TBL2	T4	OUT
sp|Q9Y4P3|TBL2_HUMAN	MELSQMSELM[+32]GLSVLLGLLALMATAAVAR	Transducin beta-like protein 2 OS=Homo sapiens OX=9606 GN=TBL2 PE=1 SV=1	Q9Y4P3	0	0.0848488	0.170475	0.0525435	0.0939502	0.0752653	0.0500078	0.064743	0.0700609	0.0883593	TBL2	TBL2_M[+32]10	10	TBL2	T4	OUT
sp|Q9Y4P3|TBL2_HUMAN	M[+32]ELSQMSELMGLSVLLGLLALMATAAVAR	Transducin beta-like protein 2 OS=Homo sapiens OX=9606 GN=TBL2 PE=1 SV=1	Q9Y4P3	0	0.183762	0.16715	0.112285	0.123544	0.107827	0.171149	0.102281	0.0748268	0.145109	TBL2	TBL2_M[+32]1	1	TBL2	T4	OUT
sp|Q9Y4P3|TBL2_HUMAN	M[+16]ELSQMSELMGLSVLLGLLALMATAAVAR	Transducin beta-like protein 2 OS=Homo sapiens OX=9606 GN=TBL2 PE=1 SV=1	Q9Y4P3	0	0.191456	0.14691	0.134514	0.117536	0.129204	0.106183	0.133563	0.120827	0.129692	TBL2	TBL2_M[+16]1	1	TBL2	T4	OUT
sp|Q9Y4W6|AFG32_HUMAN	EVLDK[+16]NDMVELLGPRPFAEK	AFG3-like protein 2 OS=Homo sapiens OX=9606 GN=AFG3L2 PE=1 SV=2	Q9Y4W6	733	0.317363	0.572322	0.287992	0.497772	0.275529	0.187112	0.350087	0.325701	0.535595	AFG32	AFG32_K[+16]738	738	AFG3L2	T4	OUT
sp|Q9Y5M8|SRPRB_HUMAN	EVKDVAEFLYQVLIDSM[+16]GLK	Signal recognition particle receptor subunit beta OS=Homo sapiens OX=9606 GN=SRPRB PE=1 SV=3	Q9Y5M8	150	0.50412	0.149623	0.202652	0.117492	0.131565	0.0829536	0.0180123	0.185312	0.139154	SRPRB	SRPRB_M[+16]167	167	SRPRB	T4	L1
sp|Q9Y5U8|MPC1_HUMAN	DYLM[+16]STHFWGPVANWGLPIAAINDMK	Mitochondrial pyruvate carrier 1 OS=Homo sapiens OX=9606 GN=MPC1 PE=1 SV=1	Q9Y5U8	19	0.0881529	0.110984	0.213095	0.190645	0.234672	0.208742	0.217239	0.242548	0.224787	MPC1	MPC1_M[+16]23	23	MPC1	T4	OUT
sp|Q9Y5U8|MPC1_HUMAN	DYLMSTHFWGPVANWGLPIAAINDM[+16]K	Mitochondrial pyruvate carrier 1 OS=Homo sapiens OX=9606 GN=MPC1 PE=1 SV=1	Q9Y5U8	19	0.0769808	0.229506	0.0605782	0.0400137	0.00482295	0.0386152	0.0560945	0.00408971	0.0889202	MPC1	MPC1_M[+16]44	44	MPC1	T4	OUT
sp|Q9Y5U9|IR3IP_HUMAN	TVMR[+16]VPLIIVNSIAIVLLLLFG	Immediate early response 3-interacting protein 1 OS=Homo sapiens OX=9606 GN=IER3IP1 PE=1 SV=1	Q9Y5U9	60	0.366656	0.579665	0.245806	0.0240416	0.266911	0.219106	0.147882	0.493826	0.235512	IR3IP	IR3IP_R[+16]64	64	IER3IP1	T4	OUT
sp|Q9Y6C9|MTCH2_HUMAN	LLGDILSLWLCNSLAYLVNTYALDSGVSTM[+16]NEMK	Mitochondrial carrier homolog 2 OS=Homo sapiens OX=9606 GN=MTCH2 PE=1 SV=1	Q9Y6C9	185	0.0107704	0.0150962	0.226811	0.193149	0.229798	0.205596	0.191145	0.196157	0.190468	MTCH2	MTCH2_M[+16]215	215	MTCH2	T4	OUT
sp|Q9Y6C9|MTCH2_HUMAN	LLGDILSLWLCNSLAYLVNTYALDSGVSTMNEM[+16]K	Mitochondrial carrier homolog 2 OS=Homo sapiens OX=9606 GN=MTCH2 PE=1 SV=1	Q9Y6C9	185	0.453957	0.292301	0.207443	0.347558	0.216117	0.188845	0.280291	0.25743	0.311529	MTCH2	MTCH2_M[+16]218	218	MTCH2	T4	OUT

## Sheet: STableIIIb
Protein	Protein_Description	Protein_Accession	C2	C1	A1	A2	Kif1	Kif2	SI1	SI2	C3	Gene_name	STRING_type	AAPL_score	AAPL_type
sp|O60716|CTND1_HUMAN	Catenin delta-1 OS=Homo sapiens OX=9606 GN=CTNND1 PE=1 SV=1	O60716	0.00224105	0.0019282	0.00226808	0.0021651	0.00262099	0.00350549	0.00156628	0.0013952	0.00214433	CTNND1	T1	-0.0736125	OUT
sp|P04004|VTNC_HUMAN	Vitronectin OS=Homo sapiens OX=9606 GN=VTN PE=1 SV=1	P04004	0.00249726	0.00128504	0.00243687	0.00350817	0.000865268	0.0013859	0.000252369	0.00257881	0.00189202	VTN	T2	0.32828	L2
sp|P04406|G3P_HUMAN	Glyceraldehyde-3-phosphate dehydrogenase OS=Homo sapiens OX=9606 GN=GAPDH PE=1 SV=3	P04406	0.046074	0.0590966	0.0612414	0.0492597	0.0604814	0.057758	0.041583	0.0552451	0.0553601	GAPDH	T2	0.916267	OUT
sp|P15924|DESP_HUMAN	Desmoplakin OS=Homo sapiens OX=9606 GN=DSP PE=1 SV=3	P15924	0.000605227	0.000444522	0.000933606	0.000505983	0.000472254	0.000641539	0.000483577	0.000467353	0.00110126	DSP	T1	-0.456102	OUT
sp|P16422|EPCAM_HUMAN	Epithelial cell adhesion molecule OS=Homo sapiens OX=9606 GN=EPCAM PE=1 SV=2	P16422	0.0086956	0.00540384	0.0139543	0.0199339	0.0141402	0.0129008	0.0112008	0.011648	0.00420446	EPCAM	T2	-0.167665	OUT
sp|P18031|PTN1_HUMAN	Tyrosine-protein phosphatase non-receptor type 1 OS=Homo sapiens OX=9606 GN=PTPN1 PE=1 SV=1	P18031	0.000467738	0.00183902	0.0076194	0.00501037	0.00249902	0.0053208	0.00755835	0.0060715	0.00197394	PTPN1	T2	2.79287	L1
sp|P35221|CTNA1_HUMAN	Catenin alpha-1 OS=Homo sapiens OX=9606 GN=CTNNA1 PE=1 SV=1	P35221	0.000688221	0.000670289	0.000952888	0.00076631	0.000988123	0.000343728	0.000828187	0.000418043	0.000798247	CTNNA1	T1	0	OUT
sp|P35222|CTNB1_HUMAN	Catenin beta-1 OS=Homo sapiens OX=9606 GN=CTNNB1 PE=1 SV=1	P35222	2.51868e-05	0.000165505	0.00241804	0.0018598	0.00182364	0.00292814	0.00116522	0.00320401	0.000343515	CTNNB1	T1	0	OUT
sp|P46940|IQGA1_HUMAN	Ras GTPase-activating-like protein IQGAP1 OS=Homo sapiens OX=9606 GN=IQGAP1 PE=1 SV=1	P46940	0.0177925	0.000618221	9.47841e-05	0.00369974	0.000126248	0.000398979	0.0307515	0.00692844	0.000435195	IQGAP1	T2	-0.0595071	OUT
sp|P63000|RAC1_HUMAN	Ras-related C3 botulinum toxin substrate 1 OS=Homo sapiens OX=9606 GN=RAC1 PE=1 SV=1	P63000	0.0540075	0.0536827	0.0768159	0.0716379	0.0776843	0.066837	0.0749516	0.107497	0.0676338	RAC1	T2	0.513508	OUT
sp|Q12864|CAD17_HUMAN	Cadherin-17 OS=Homo sapiens OX=9606 GN=CDH17 PE=2 SV=3	Q12864	0.000243749	0.000182659	0.000863634	0.000934525	0.000495406	0.000412849	0.000511758	0.000431103	0.00064566	CDH17	Bait	\	Bait
sp|O43707|ACTN4_HUMAN	Alpha-actinin-4 OS=Homo sapiens OX=9606 GN=ACTN4 PE=1 SV=2	O43707	0.00701609	0.00380524	0.0012701	0.0240003	0.0216924	0.0123474	0.00712187	0.0266978	0.0018208	ACTN4	T3	1.81474	L1
sp|O43795|MYO1B_HUMAN	Unconventional myosin-Ib OS=Homo sapiens OX=9606 GN=MYO1B PE=1 SV=3	O43795	0.0219442	0.0140404	0.0164005	0.0656286	0.0245847	0.0106701	0.0186453	0.0552009	0.00273473	MYO1B	T3	2.45135	L1
sp|O75844|FACE1_HUMAN	CAAX prenyl protease 1 homolog OS=Homo sapiens OX=9606 GN=ZMPSTE24 PE=1 SV=2	O75844	0.080213	0.11836	0.0776667	0.0143416	0.0824737	0.00487755	0.0200844	0.0247707	0.0112412	ZMPSTE24	T3	0	OUT
sp|O95994|AGR2_HUMAN	Anterior gradient protein 2 homolog OS=Homo sapiens OX=9606 GN=AGR2 PE=1 SV=1	O95994	0.0540694	0.0327567	0.0369448	0.0403164	0.0389416	0.0511557	0.048258	0.0434372	0.0556647	AGR2	T3	-0.242956	OUT
sp|P00338|LDHA_HUMAN	L-lactate dehydrogenase A chain OS=Homo sapiens OX=9606 GN=LDHA PE=1 SV=2	P00338	0.054595	0.140779	0.0320334	0.00777235	0.0212013	0.0343712	0.00873858	0.0147822	0.0335368	LDHA	T3	0	OUT
sp|P00367|DHE3_HUMAN	Glutamate dehydrogenase 1, mitochondrial OS=Homo sapiens OX=9606 GN=GLUD1 PE=1 SV=2	P00367	0.0711707	0.0756742	0.449856	0.173844	0.325283	0.378017	0.24231	0.284966	0.0644932	GLUD1	T3	5.12236	L1
sp|P00395|COX1_HUMAN	Cytochrome c oxidase subunit 1 OS=Homo sapiens OX=9606 GN=MT-CO1 PE=1 SV=1	P00395	0.336698	0.383183	0.29855	0.229513	0.277017	0.722211	0.728742	0.198014	0.341058	MT-CO1	T3	-2.05086	OUT
sp|P00403|COX2_HUMAN	Cytochrome c oxidase subunit 2 OS=Homo sapiens OX=9606 GN=MT-CO2 PE=1 SV=1	P00403	0.165418	0.112958	0.0767245	0.0717199	0.0925454	0.0975616	0.0824974	0.103964	0.108498	MT-CO2	T3	-0.803353	OUT
sp|P02649|APOE_HUMAN	Apolipoprotein E OS=Homo sapiens OX=9606 GN=APOE PE=1 SV=1	P02649	0.279249	0.0648161	0.0500125	0.0233237	0.0688925	0.0132046	0.0803174	0.0242356	0.0680005	APOE	T3	-0.0641491	OUT
sp|P02786|TFR1_HUMAN	Transferrin receptor protein 1 OS=Homo sapiens OX=9606 GN=TFRC PE=1 SV=2	P02786	0.104542	0.0787242	0.0458663	0.0508731	0.0475494	0.0564014	0.0518861	0.0273511	0.0531134	TFRC	T3	-0.470188	OUT
sp|P05141|ADT2_HUMAN	ADP/ATP translocase 2 OS=Homo sapiens OX=9606 GN=SLC25A5 PE=1 SV=7	P05141	0.0411811	0.0345396	0.0430339	0.0440961	0.0368521	0.0437221	0.0227483	0.03434	0.0464564	SLC25A5	T3	-1.02652	OUT
sp|P07237|PDIA1_HUMAN	Protein disulfide-isomerase OS=Homo sapiens OX=9606 GN=P4HB PE=1 SV=3	P07237	0.442783	0.506789	0.564473	0.564225	0.538337	0.486111	0.671431	0.673568	0.763702	P4HB	T3	0.839468	OUT
sp|P08238|HS90B_HUMAN	Heat shock protein HSP 90-beta OS=Homo sapiens OX=9606 GN=HSP90AB1 PE=1 SV=4	P08238	0.00132531	0.139985	0.0514251	0.000775307	0.0383574	0.0313203	0.00130857	0.00558369	0.100104	HSP90AB1	T3	0.125097	OUT
sp|P08574|CY1_HUMAN	Cytochrome c1, heme protein, mitochondrial OS=Homo sapiens OX=9606 GN=CYC1 PE=1 SV=3	P08574	0.0478388	0.031413	0.0887291	0.061807	0.0712708	0.0715837	0.0719957	0.0586851	0.120855	CYC1	T3	1.1201	L1
sp|P08962|CD63_HUMAN	CD63 antigen OS=Homo sapiens OX=9606 GN=CD63 PE=1 SV=2	P08962	0.246088	0.0251251	0.159574	0.0868095	0.198579	0.10912	0.168009	0.1295	0.205994	CD63	T3	-0.137581	OUT
sp|P09525|ANXA4_HUMAN	Annexin A4 OS=Homo sapiens OX=9606 GN=ANXA4 PE=1 SV=4	P09525	0.0120609	0.0101379	0.00268511	0.0132127	0.0473783	0.00807256	0.00944752	0.00870256	0.0186143	ANXA4	T3	0.0118309	OUT
sp|P10515|ODP2_HUMAN	Dihydrolipoyllysine-residue acetyltransferase component of pyruvate dehydrogenase complex, mitochondrial OS=Homo sapiens OX=9606 GN=DLAT PE=1 SV=3	P10515	0.0343179	0.0304737	0.031464	0.00207174	0.0191546	0.0371818	0.00354604	0.000928348	0.0306444	DLAT	T3	-0.345038	OUT
sp|P10809|CH60_HUMAN	60 kDa heat shock protein, mitochondrial OS=Homo sapiens OX=9606 GN=HSPD1 PE=1 SV=2	P10809	0.0412135	0.0360259	0.0257593	0.0276628	0.0285166	0.0442866	0.0410859	0.0265585	0.0291715	HSPD1	T3	-1.6912	OUT
sp|P11021|BIP_HUMAN	Endoplasmic reticulum chaperone BiP OS=Homo sapiens OX=9606 GN=HSPA5 PE=1 SV=2	P11021	0.0212578	0.0224377	0.00409192	0.00685633	0.00556483	0.00670627	0.00655495	0.0106471	0.0109	HSPA5	T3	0	OUT
sp|P11166|GTR1_HUMAN	Solute carrier family 2, facilitated glucose transporter member 1 OS=Homo sapiens OX=9606 GN=SLC2A1 PE=1 SV=2	P11166	0.0343299	0.0335392	0.0321102	0.0298805	0.035879	0.0395649	0.0394282	0.0337008	0.0388704	SLC2A1	T3	2.35548	L1
sp|P11169|GTR3_HUMAN	Solute carrier family 2, facilitated glucose transporter member 3 OS=Homo sapiens OX=9606 GN=SLC2A3 PE=1 SV=1	P11169	0.0506989	0.0242442	0.0360731	0.0211943	0.0365199	0.0293013	0.0322838	0.0232894	0.0404594	SLC2A3	T3	-3.93688	OUT
sp|P11233|RALA_HUMAN	Ras-related protein Ral-A OS=Homo sapiens OX=9606 GN=RALA PE=1 SV=1	P11233	0.0719417	0	0	0.303514	0	0.0715954	0.000187434	0.251554	0.000780882	RALA	T3	0	OUT
sp|P11234|RALB_HUMAN	Ras-related protein Ral-B OS=Homo sapiens OX=9606 GN=RALB PE=1 SV=1	P11234	0.000753713	0.0204641	0.0142708	0.0200596	0.0164903	0.0146944	0.0092857	0.0135092	0.0117297	RALB	T3	-0.175162	OUT
sp|P12236|ADT3_HUMAN	ADP/ATP translocase 3 OS=Homo sapiens OX=9606 GN=SLC25A6 PE=1 SV=4	P12236	0.0663235	0.0761835	0.0588922	0.038675	0.112353	0.121082	0.197324	0.103389	0.104573	SLC25A6	T3	-1.81089	OUT
sp|P12277|KCRB_HUMAN	Creatine kinase B-type OS=Homo sapiens OX=9606 GN=CKB PE=1 SV=1	P12277	0.0407051	0.0617754	0.0358411	0.0298937	0.0427549	0.0499132	0.0637099	0.0484584	0.0330478	CKB	T3	-0.627463	OUT
sp|P13010|XRCC5_HUMAN	X-ray repair cross-complementing protein 5 OS=Homo sapiens OX=9606 GN=XRCC5 PE=1 SV=3	P13010	0.0285214	0.0392864	0.0214035	0.0150521	0.018418	0.0257493	0.0257419	0.0279558	0.003211	XRCC5	T3	0.598081	OUT
sp|P13073|COX41_HUMAN	Cytochrome c oxidase subunit 4 isoform 1, mitochondrial OS=Homo sapiens OX=9606 GN=COX4I1 PE=1 SV=1	P13073	0.0514628	0.0707864	0.00974065	0.00420337	0.008479	0.00927545	0.00125649	0.134106	0.00802958	COX4I1	T3	-0.117132	OUT
sp|P13667|PDIA4_HUMAN	Protein disulfide-isomerase A4 OS=Homo sapiens OX=9606 GN=PDIA4 PE=1 SV=2	P13667	0.110861	0.110253	0.128692	0.11662	0.120671	0.259484	0.149466	0.0352141	0.214954	PDIA4	T3	0.0560496	OUT
sp|P13688|CEAM1_HUMAN	Carcinoembryonic antigen-related cell adhesion molecule 1 OS=Homo sapiens OX=9606 GN=CEACAM1 PE=1 SV=2	P13688	0.0444856	0.0379407	0.106504	0.112582	0.0523048	0.0506654	0.0433505	0.0437978	0.0433437	CEACAM1	T3	1.16888	L1
sp|P14625|ENPL_HUMAN	Endoplasmin OS=Homo sapiens OX=9606 GN=HSP90B1 PE=1 SV=1	P14625	0.00652003	0.00167425	0.0153595	0.0011242	0.000492989	0	0.00287024	0.0108005	0.0301656	HSP90B1	T3	-0.112742	OUT
sp|P16435|NCPR_HUMAN	NADPH--cytochrome P450 reductase OS=Homo sapiens OX=9606 GN=POR PE=1 SV=2	P16435	0.0153124	0.0115517	0.0133402	0.0089319	0.0106537	0.00693223	0.00953147	0.0091457	0.0168476	POR	T3	-0.10114	OUT
sp|P16615|AT2A2_HUMAN	Sarcoplasmic/endoplasmic reticulum calcium ATPase 2 OS=Homo sapiens OX=9606 GN=ATP2A2 PE=1 SV=1	P16615	0.0336755	0.0380051	0.032055	0.0447237	0.0237119	0.0428054	0.0422727	0.0372835	0.0285046	ATP2A2	T3	-0.798827	OUT
sp|P20700|LMNB1_HUMAN	Lamin-B1 OS=Homo sapiens OX=9606 GN=LMNB1 PE=1 SV=2	P20700	0.00875813	0.00170947	0.00353445	0.0132663	0.030133	0.045747	0.0183289	0.0232045	0.026263	LMNB1	T3	0.264628	OUT
sp|P21796|VDAC1_HUMAN	Voltage-dependent anion-selective channel protein 1 OS=Homo sapiens OX=9606 GN=VDAC1 PE=1 SV=2	P21796	0.0480006	0.0519857	0.0387709	0.0314445	0.0494102	0.0502825	0.0325262	0.0321101	0.0413878	VDAC1	T3	-0.151925	OUT
sp|P27487|DPP4_HUMAN	Dipeptidyl peptidase 4 OS=Homo sapiens OX=9606 GN=DPP4 PE=1 SV=2	P27487	0.0203738	0.0324573	0.0194744	0.00801012	0.0145574	0.0140081	0.0160904	0.0142736	0.0105708	DPP4	T3	-1.33788	OUT
sp|P27797|CALR_HUMAN	Calreticulin OS=Homo sapiens OX=9606 GN=CALR PE=1 SV=1	P27797	0.0422801	0.0429143	0.0560543	0.0457439	0.0555203	0.0632939	0.0469592	0.051047	0.0809051	CALR	T3	0.624003	OUT
sp|P27824|CALX_HUMAN	Calnexin OS=Homo sapiens OX=9606 GN=CANX PE=1 SV=2	P27824	0.085442	0.0650372	0.0872461	0.0507638	0.0758561	0.0757584	0.0650858	0.059365	0.102349	CANX	T3	0.858617	OUT
sp|P30101|PDIA3_HUMAN	Protein disulfide-isomerase A3 OS=Homo sapiens OX=9606 GN=PDIA3 PE=1 SV=4	P30101	0.24021	0.133529	0.131513	0.165002	0.101202	0.20498	0.235498	0.122878	0.0902544	PDIA3	T3	-0.142649	OUT
sp|P35232|PHB_HUMAN	Prohibitin OS=Homo sapiens OX=9606 GN=PHB PE=1 SV=1	P35232	4.64486e-05	0.000128091	0.000595694	0.000357699	0.000817316	0.00249674	0.00113713	0.000878485	0.00138024	PHB	T3	0	OUT
sp|P35579|MYH9_HUMAN	Myosin-9 OS=Homo sapiens OX=9606 GN=MYH9 PE=1 SV=4	P35579	0.241574	0.220275	0.00706336	0.77499	0.00194856	0.78585	0.0240317	0.0210859	0.0220408	MYH9	T3	2.48616	L1
sp|P35613|BASI_HUMAN	Basigin OS=Homo sapiens OX=9606 GN=BSG PE=1 SV=2	P35613	0.0142214	0.0117425	0.0070744	0.006973	0.0112289	0.0138794	0.00866205	0.00889299	0.0139764	BSG	T3	-0.460071	OUT
sp|P38646|GRP75_HUMAN	Stress-70 protein, mitochondrial OS=Homo sapiens OX=9606 GN=HSPA9 PE=1 SV=2	P38646	0.0660102	0.0417738	0.134672	0.0706632	0.010362	0.0662639	0.48903	0.28904	0.0232821	HSPA9	T3	0	OUT
sp|P45880|VDAC2_HUMAN	Voltage-dependent anion-selective channel protein 2 OS=Homo sapiens OX=9606 GN=VDAC2 PE=1 SV=2	P45880	0.0308756	0.0258	0.203633	0.0211838	0.0333498	0.0343923	0.0200954	0.0254423	0.0296895	VDAC2	T3	4.41698	L1
sp|P50402|EMD_HUMAN	Emerin OS=Homo sapiens OX=9606 GN=EMD PE=1 SV=1	P50402	0.0552257	0.00406142	0.0358	0.0323446	0.049908	0.0504437	0.0350891	0.0213425	0.0490043	EMD	T3	0	OUT
sp|P51149|RAB7A_HUMAN	Ras-related protein Rab-7a OS=Homo sapiens OX=9606 GN=RAB7A PE=1 SV=1	P51149	0.0633298	0.0329246	0.062299	0.0345055	0.04589	0.0560005	0.0489836	0.036654	0.0147132	RAB7A	T3	0.235298	OUT
sp|P51572|BAP31_HUMAN	B-cell receptor-associated protein 31 OS=Homo sapiens OX=9606 GN=BCAP31 PE=1 SV=3	P51572	0.0864951	0.0899573	0.0561063	0.0406391	0.0864187	0.0558496	0.0461891	0.0778791	0.0623392	BCAP31	T3	-0.111853	OUT
sp|P52272|HNRPM_HUMAN	Heterogeneous nuclear ribonucleoprotein M OS=Homo sapiens OX=9606 GN=HNRNPM PE=1 SV=3	P52272	0.0130894	0.0494654	0.0464163	0.109604	0.0807133	0.0458627	0.0188512	0.0171369	0.0115317	HNRNPM	T3	5.45181	L1
sp|P62330|ARF6_HUMAN	ADP-ribosylation factor 6 OS=Homo sapiens OX=9606 GN=ARF6 PE=1 SV=2	P62330	0.0136204	0.0146426	0.00970283	0.00161062	0.00465521	0.224026	0.00155354	0.140699	0.0275768	ARF6	T3	-0.208179	OUT
sp|P68104|EF1A1_HUMAN	Elongation factor 1-alpha 1 OS=Homo sapiens OX=9606 GN=EEF1A1 PE=1 SV=1	P68104	0.0587173	0.0748249	0.060613	0.0702086	0.0573443	0.0272079	0.0171899	0.0629291	0.0781841	EEF1A1	T3	0.0854334	OUT
sp|P68363|TBA1B_HUMAN	Tubulin alpha-1B chain OS=Homo sapiens OX=9606 GN=TUBA1B PE=1 SV=1	P68363	0.00816904	0.0111689	0.00794962	0.00850705	0.000612706	0.000694861	0.000728138	0.000633627	0.00100675	TUBA1B	T3	0.0181867	OUT
sp|P78527|PRKDC_HUMAN	DNA-dependent protein kinase catalytic subunit OS=Homo sapiens OX=9606 GN=PRKDC PE=1 SV=3	P78527	0.0337731	0.0500496	0.0751897	0.0473175	0.0376335	0.0245542	0.0298034	0.0580317	0.0165373	PRKDC	T3	2.7817	L1
sp|Q00325|MPCP_HUMAN	Phosphate carrier protein, mitochondrial OS=Homo sapiens OX=9606 GN=SLC25A3 PE=1 SV=2	Q00325	0.016597	0.063217	0.014825	0.015963	0.0412039	0.025438	0.0146534	0.0212464	0.0299279	SLC25A3	T3	-2.01999	OUT
sp|Q00610|CLH1_HUMAN	Clathrin heavy chain 1 OS=Homo sapiens OX=9606 GN=CLTC PE=1 SV=5	Q00610	0.000531654	0.000209501	0.00403175	0.00804805	7.00466e-05	0.00708355	0.00102876	0.00534999	0.0133344	CLTC	T3	1.13954	L1
sp|Q01082|SPTB2_HUMAN	Spectrin beta chain, non-erythrocytic 1 OS=Homo sapiens OX=9606 GN=SPTBN1 PE=1 SV=2	Q01082	0.00133664	0.00260229	0.00212517	0.00511378	0.00289719	0.00377501	0.00416504	0.00689705	0.00492272	SPTBN1	T3	0.848989	OUT
sp|Q13813|SPTN1_HUMAN	Spectrin alpha chain, non-erythrocytic 1 OS=Homo sapiens OX=9606 GN=SPTAN1 PE=1 SV=3	Q13813	0.146446	0.111611	0.250274	0.02481	0.181014	0.280106	0.489591	0.133343	0.446102	SPTAN1	T3	0.226011	OUT
sp|Q14126|DSG2_HUMAN	Desmoglein-2 OS=Homo sapiens OX=9606 GN=DSG2 PE=1 SV=2	Q14126	0.0658376	0.0315996	0.00415333	0.0034739	0.0195703	0.00865758	0.0665216	0.00861889	0.0107106	DSG2	T3	-0.263907	OUT
sp|Q14974|IMB1_HUMAN	Importin subunit beta-1 OS=Homo sapiens OX=9606 GN=KPNB1 PE=1 SV=2	Q14974	0.346908	0.216171	0.226993	0.271858	0.275527	0.246299	0.239929	0.317587	0.307567	KPNB1	T3	0.0776872	OUT
sp|Q8WTV0|SCRB1_HUMAN	Scavenger receptor class B member 1 OS=Homo sapiens OX=9606 GN=SCARB1 PE=1 SV=1	Q8WTV0	0.0227962	0.0154391	0.0487357	0.0242732	0.0345305	0.0493402	0.0237532	0.0516995	0.0514511	SCARB1	T3	0.422804	OUT
sp|Q9NR30|DDX21_HUMAN	Nucleolar RNA helicase 2 OS=Homo sapiens OX=9606 GN=DDX21 PE=1 SV=5	Q9NR30	0.014534	0.0556603	0.142676	0.120224	0.0694434	0.229335	0.10772	0.187697	0.18725	DDX21	T3	1.77241	L1
sp|A0FGR8|ESYT2_HUMAN	Extended synaptotagmin-2 OS=Homo sapiens OX=9606 GN=ESYT2 PE=1 SV=1	A0FGR8	0.052105	0.115278	0.0101314	0.0443738	0.051916	0.0506149	0.0420129	0.0440808	0.041291	ESYT2	T4	-0.130728	OUT
sp|A1L0T0|ILVBL_HUMAN	Acetolactate synthase-like protein OS=Homo sapiens OX=9606 GN=ILVBL PE=1 SV=2	A1L0T0	0.0410189	0.0384565	0.0310707	0.0199743	0.0497917	0.040849	0.0218214	0.0221299	0.0323619	ILVBL	T4	0.517141	OUT
sp|O00264|PGRC1_HUMAN	Membrane-associated progesterone receptor component 1 OS=Homo sapiens OX=9606 GN=PGRMC1 PE=1 SV=3	O00264	0.0156195	0.0113709	0.0187278	0.0125769	0.0188609	0.0227374	0.0117862	0.0129957	0.0205598	PGRMC1	T4	-0.60341	OUT
sp|O14880|MGST3_HUMAN	Microsomal glutathione S-transferase 3 OS=Homo sapiens OX=9606 GN=MGST3 PE=1 SV=1	O14880	0.0384978	0.0424414	0.0531139	0.00379885	0.0123573	0.0134164	0.0157502	0.00485323	0.0335984	MGST3	T4	1.91051	L1
sp|O15121|DEGS1_HUMAN	Sphingolipid delta(4)-desaturase DES1 OS=Homo sapiens OX=9606 GN=DEGS1 PE=1 SV=1	O15121	0.421738	0.333154	0.120297	0.076587	0.766082	0.359676	0.188472	0.29559	0.374111	DEGS1	T4	-0.0647628	OUT
sp|O15260|SURF4_HUMAN	Surfeit locus protein 4 OS=Homo sapiens OX=9606 GN=SURF4 PE=1 SV=3	O15260	0.0654346	0.0645635	0.0593735	0.0534478	0.0579386	0.0691955	0.052244	0.0571298	0.0637799	SURF4	T4	-1.19855	OUT
sp|O43169|CYB5B_HUMAN	Cytochrome b5 type B OS=Homo sapiens OX=9606 GN=CYB5B PE=1 SV=3	O43169	0.0150915	0.0396237	0.0301343	0.0164955	0.0304629	0.0219737	0.0153578	0.023714	0.0234339	CYB5B	T4	-0.250773	OUT
sp|O43826|G6PT1_HUMAN	Glucose-6-phosphate exchanger SLC37A4 OS=Homo sapiens OX=9606 GN=SLC37A4 PE=1 SV=1	O43826	0.189582	0.158224	0.0526239	0.032686	0.0628465	0.055977	0.026604	0.0417571	0.0102658	SLC37A4	T4	-0.199259	OUT
sp|O43837|IDH3B_HUMAN	Isocitrate dehydrogenase [NAD] subunit beta, mitochondrial OS=Homo sapiens OX=9606 GN=IDH3B PE=1 SV=2	O43837	0.03246	0.640124	0.273256	0.43711	0.0717572	0.656839	0.128649	0.336517	0.436864	IDH3B	T4	0.370433	OUT
sp|O75396|SC22B_HUMAN	Vesicle-trafficking protein SEC22b OS=Homo sapiens OX=9606 GN=SEC22B PE=1 SV=4	O75396	0.00121365	0.0318919	0.00252176	0.00298842	0.0260039	0.0289086	0.0291546	0.0443105	0.0322639	SEC22B	T4	-0.160439	OUT
sp|O75880|SCO1_HUMAN	Protein SCO1 homolog, mitochondrial OS=Homo sapiens OX=9606 GN=SCO1 PE=1 SV=1	O75880	0.0510475	0.0193521	0.0196044	0.0290351	0.105909	0.0270013	0.04701	0.0550395	0.0140575	SCO1	T4	0	OUT
sp|O94973|AP2A2_HUMAN	AP-2 complex subunit alpha-2 OS=Homo sapiens OX=9606 GN=AP2A2 PE=1 SV=2	O94973	0.670272	0.540617	0.671371	0.0910169	0.300377	0.754672	0.24428	0.568052	0.643639	AP2A2	T4	0	OUT
sp|O95292|VAPB_HUMAN	Vesicle-associated membrane protein-associated protein B/C OS=Homo sapiens OX=9606 GN=VAPB PE=1 SV=3	O95292	0.066156	0.0026277	0.0640838	0.0598659	0.0637147	0.0724908	0.0638568	0.0571366	0.0648072	VAPB	T4	0.774752	OUT
sp|O95470|SGPL1_HUMAN	Sphingosine-1-phosphate lyase 1 OS=Homo sapiens OX=9606 GN=SGPL1 PE=1 SV=3	O95470	0.00873379	0.0234696	0.0123578	0.0127375	0.0117892	0.00653815	0.0100351	0.00720721	0.0148174	SGPL1	T4	0.926314	OUT
sp|O96000|NDUBA_HUMAN	NADH dehydrogenase [ubiquinone] 1 beta subcomplex subunit 10 OS=Homo sapiens OX=9606 GN=NDUFB10 PE=1 SV=3	O96000	0.374954	0.316602	0.242112	0.0250198	0.336426	0.249534	0.472284	0.0694	0.2299	NDUFB10	T4	0.0879993	OUT
sp|O96008|TOM40_HUMAN	Mitochondrial import receptor subunit TOM40 homolog OS=Homo sapiens OX=9606 GN=TOMM40 PE=1 SV=1	O96008	0.184421	0.193015	0.227132	0.195625	0.196017	0.183692	0.156268	0.207672	0.168855	TOMM40	T4	-0.267361	OUT
sp|P00167|CYB5_HUMAN	Cytochrome b5 OS=Homo sapiens OX=9606 GN=CYB5A PE=1 SV=2	P00167	0.00645014	0.00854827	0.00600979	0.0236627	0.00515315	0.0133143	0.0267701	0.0222047	0.0215679	CYB5A	T4	0.644322	OUT
sp|P01892|1A02_HUMAN	HLA class I histocompatibility antigen, A-2 alpha chain OS=Homo sapiens OX=9606 GN=HLA-A PE=1 SV=1	P01892	0.0142312	0.208037	0.0160689	0.237249	0.00667288	0.0084482	0.00157741	0.00662699	0.0147405	HLA-A	T4	0.618354	L2
sp|P04843|RPN1_HUMAN	Dolichyl-diphosphooligosaccharide--protein glycosyltransferase subunit 1 OS=Homo sapiens OX=9606 GN=RPN1 PE=1 SV=1	P04843	0.00269975	0.213567	0.0127032	0.00544417	0.00980233	0.00821525	0.00704229	0.0081025	0.00854983	RPN1	T4	-0.414472	OUT
sp|P04844|RPN2_HUMAN	Dolichyl-diphosphooligosaccharide--protein glycosyltransferase subunit 2 OS=Homo sapiens OX=9606 GN=RPN2 PE=1 SV=3	P04844	0.0380588	0.0267135	0.0152669	0.0519657	0.0136121	0.0256171	0.0287933	0.0586936	0.0266439	RPN2	T4	-0.840922	OUT
sp|P05023|AT1A1_HUMAN	Sodium/potassium-transporting ATPase subunit alpha-1 OS=Homo sapiens OX=9606 GN=ATP1A1 PE=1 SV=1	P05023	0.0338322	0.0257201	0.0459742	0.0340999	0.0397491	0.0498909	0.0407021	0.0318484	0.0742463	ATP1A1	T4	-3.43925	OUT
sp|P05026|AT1B1_HUMAN	Sodium/potassium-transporting ATPase subunit beta-1 OS=Homo sapiens OX=9606 GN=ATP1B1 PE=1 SV=1	P05026	0.0362513	0.0183488	0.0367608	0.00393635	0.0333692	0.0301799	0.00605388	0.0271398	0.0299334	ATP1B1	T4	0.394196	OUT
sp|P09327|VILI_HUMAN	Villin-1 OS=Homo sapiens OX=9606 GN=VIL1 PE=1 SV=4	P09327	0.0166061	0.0148607	0.0171885	0.00442558	0.0219108	0.0182134	0.00242528	0.0104519	0.0207992	VIL1	T4	-0.330859	OUT
sp|P14854|CX6B1_HUMAN	Cytochrome c oxidase subunit 6B1 OS=Homo sapiens OX=9606 GN=COX6B1 PE=1 SV=2	P14854	0.0100502	0.00679351	0.0117985	0.0155689	0.0183329	0.0189604	0.0137239	0.0158272	0.0167269	COX6B1	T4	1.10864	L1
sp|P15328|FOLR1_HUMAN	Folate receptor alpha OS=Homo sapiens OX=9606 GN=FOLR1 PE=1 SV=3	P15328	0.0434025	0.0357172	0.0155467	0.00696756	0.0398843	0.0381593	0.0118557	0.0207362	0.0388829	FOLR1	T4	-0.744779	OUT
sp|P20020|AT2B1_HUMAN	Plasma membrane calcium-transporting ATPase 1 OS=Homo sapiens OX=9606 GN=ATP2B1 PE=1 SV=4	P20020	0.00309101	0.00761327	0.00616384	0.00640453	0.00532701	0.00523841	0.00534575	0.00330862	0.00846324	ATP2B1	T4	0.433275	OUT
sp|P20674|COX5A_HUMAN	Cytochrome c oxidase subunit 5A, mitochondrial OS=Homo sapiens OX=9606 GN=COX5A PE=1 SV=2	P20674	0.102816	0.0825923	0.0928257	0.0415075	0.095871	0.0784138	0.0350075	0.0180502	0.1119	COX5A	T4	0.261403	OUT
sp|P27216|ANX13_HUMAN	Annexin A13 OS=Homo sapiens OX=9606 GN=ANXA13 PE=1 SV=3	P27216	0.0191244	0.049414	0.000699475	0.0126883	0.331978	0.00292161	0.00835489	0.00420984	0.0355454	ANXA13	T4	-0.209159	OUT
sp|P27449|VATL_HUMAN	V-type proton ATPase 16 kDa proteolipid subunit OS=Homo sapiens OX=9606 GN=ATP6V0C PE=1 SV=1	P27449	0.0716858	0.0264432	0.056049	0.109414	0.0988377	0.186406	0.0528627	0.0877223	0.0941333	ATP6V0C	T4	2.52074	L1
sp|P39656|OST48_HUMAN	Dolichyl-diphosphooligosaccharide--protein glycosyltransferase 48 kDa subunit OS=Homo sapiens OX=9606 GN=DDOST PE=1 SV=4	P39656	0.0525534	0.0433028	0.0972874	0.0601713	0.0895278	0.101607	0.0736392	0.0628112	0.0548096	DDOST	T4	3.32411	L1
sp|P42167|LAP2B_HUMAN	Lamina-associated polypeptide 2, isoforms beta/gamma OS=Homo sapiens OX=9606 GN=TMPO PE=1 SV=2	P42167	0.0181687	0.0176896	0.0167432	0.018354	0.0123123	0.012351	0.00355186	0.00678588	0.017085	TMPO	T4	-0.264502	OUT
sp|P46977|STT3A_HUMAN	Dolichyl-diphosphooligosaccharide--protein glycosyltransferase subunit STT3A OS=Homo sapiens OX=9606 GN=STT3A PE=1 SV=2	P46977	0.0184173	0.0134677	0.0243914	0.0158479	0.0222482	0.0346209	0.0186731	0.0149489	0.0105793	STT3A	T4	1.09056	L1
sp|P49257|LMAN1_HUMAN	Protein ERGIC-53 OS=Homo sapiens OX=9606 GN=LMAN1 PE=1 SV=2	P49257	0.972399	0.983359	0.935724	0.98681	0.955148	0.974994	0.98333	0.976806	0.949742	LMAN1	T4	-0.413475	OUT
sp|P49281|NRAM2_HUMAN	Natural resistance-associated macrophage protein 2 OS=Homo sapiens OX=9606 GN=SLC11A2 PE=1 SV=2	P49281	0.0920159	0.0930124	0.0956086	0.0803758	0.0852909	0.0953659	0.0876066	0.0149399	0.0665624	SLC11A2	T4	0.0774025	OUT
sp|P51148|RAB5C_HUMAN	Ras-related protein Rab-5C OS=Homo sapiens OX=9606 GN=RAB5C PE=1 SV=2	P51148	0.00860396	0.00418098	0.047239	0.12717	0.0227963	0.00881324	0.00608556	0.00121061	0.0362681	RAB5C	T4	0	OUT
sp|P57088|TMM33_HUMAN	Transmembrane protein 33 OS=Homo sapiens OX=9606 GN=TMEM33 PE=1 SV=2	P57088	0.241294	0.0259641	0.00193842	0.00606735	0.483222	0.40296	0.000806755	0.00183997	0.00170658	TMEM33	T4	0	OUT
sp|P62820|RAB1A_HUMAN	Ras-related protein Rab-1A OS=Homo sapiens OX=9606 GN=RAB1A PE=1 SV=3	P62820	0.0825408	0.0297789	0.0038836	0.0212716	0.00923916	0.0257941	0.0272772	0.0491534	0.0470772	RAB1A	T4	0	OUT
sp|P98196|AT11A_HUMAN	Probable phospholipid-transporting ATPase IH OS=Homo sapiens OX=9606 GN=ATP11A PE=1 SV=3	P98196	0.278074	0.0650201	0.4562	0.883435	0.373697	0.24438	0.109364	0.600846	0.642188	ATP11A	T4	0.786613	L2
sp|Q02978|M2OM_HUMAN	Mitochondrial 2-oxoglutarate/malate carrier protein OS=Homo sapiens OX=9606 GN=SLC25A11 PE=1 SV=3	Q02978	0.0162091	0.00325822	0.00281168	0.0206838	0.000704414	0.00140754	0.016208	0.0129134	0.0138709	SLC25A11	T4	0	OUT
sp|Q12907|LMAN2_HUMAN	Vesicular integral-membrane protein VIP36 OS=Homo sapiens OX=9606 GN=LMAN2 PE=1 SV=1	Q12907	0.0404678	0.0373348	0.0386411	0.00329781	0.0487936	0.0294096	0.0147321	0.00361624	0.221585	LMAN2	T4	-0.193875	OUT
sp|Q14108|SCRB2_HUMAN	Lysosome membrane protein 2 OS=Homo sapiens OX=9606 GN=SCARB2 PE=1 SV=2	Q14108	0.0172093	0.0235037	0.0164949	0.0318035	0.0438068	0.0412215	0.0238573	0.02862	0.0180501	SCARB2	T4	-0.569764	OUT
sp|Q14697|GANAB_HUMAN	Neutral alpha-glucosidase AB OS=Homo sapiens OX=9606 GN=GANAB PE=1 SV=3	Q14697	0.0499667	0.0501022	0.0242993	0.0339727	0.0320199	0.0404716	0.0327101	0.0382383	0.0312962	GANAB	T4	-1.02527	OUT
sp|Q15041|AR6P1_HUMAN	ADP-ribosylation factor-like protein 6-interacting protein 1 OS=Homo sapiens OX=9606 GN=ARL6IP1 PE=1 SV=2	Q15041	0.0779036	0.0662718	0.0524806	0.069413	0.0503875	0.0609181	0.0742066	0.0601753	0.037396	ARL6IP1	T4	0.0456701	OUT
sp|Q15084|PDIA6_HUMAN	Protein disulfide-isomerase A6 OS=Homo sapiens OX=9606 GN=PDIA6 PE=1 SV=1	Q15084	0.0367591	0.0376633	0.0224317	0.0883779	0.042239	0.0375213	0.0580811	0.0420114	0.0384544	PDIA6	T4	0.18651	OUT
sp|Q15363|TMED2_HUMAN	Transmembrane emp24 domain-containing protein 2 OS=Homo sapiens OX=9606 GN=TMED2 PE=1 SV=1	Q15363	0.0300572	0.0442417	0.0336951	0.0399889	0.025287	0.0199927	0.0455153	0.0478337	0.0242503	TMED2	T4	0.809964	OUT
sp|Q16891|MIC60_HUMAN	MICOS complex subunit MIC60 OS=Homo sapiens OX=9606 GN=IMMT PE=1 SV=1	Q16891	0.154867	0.19169	0.231222	0.2703	0.220446	0.255381	0.230914	0.0880709	0.254968	IMMT	T4	0	OUT
sp|Q4KMQ2|ANO6_HUMAN	Anoctamin-6 OS=Homo sapiens OX=9606 GN=ANO6 PE=1 SV=2	Q4KMQ2	0.0537753	0.0380447	0.167239	0.0958272	0.0573415	0.0894328	0.0717699	0.075143	0.110985	ANO6	T4	-0.0650434	OUT
sp|Q53GQ0|DHB12_HUMAN	Very-long-chain 3-oxoacyl-CoA reductase OS=Homo sapiens OX=9606 GN=HSD17B12 PE=1 SV=2	Q53GQ0	0.0901739	0.089993	0.0627888	0.083399	0.0883904	0.0917274	0.0615793	0.105338	0.0756866	HSD17B12	T4	-0.227868	OUT
sp|Q5BJD5|TM41B_HUMAN	Transmembrane protein 41B OS=Homo sapiens OX=9606 GN=TMEM41B PE=1 SV=1	Q5BJD5	0.78346	0.259506	0.593818	0.667384	0.627258	0.403476	0.63643	0.573167	0.786936	TMEM41B	T4	1.16498	L1
sp|Q5JPE7|NOMO2_HUMAN	Nodal modulator 2 OS=Homo sapiens OX=9606 GN=NOMO2 PE=1 SV=1	Q5JPE7	0.0682402	0.102972	0.084395	0.153596	0.141862	0.149482	0.218691	0.143302	0.0336616	NOMO2	T4	0.17697	L2
sp|Q6DD88|ATLA3_HUMAN	Atlastin-3 OS=Homo sapiens OX=9606 GN=ATL3 PE=1 SV=1	Q6DD88	0.107302	0.107159	0.0757564	0.145789	0.0651572	0.0546633	0.0705582	0.00439454	0.0649028	ATL3	T4	1.37642	L1
sp|Q7Z7H5|TMED4_HUMAN	Transmembrane emp24 domain-containing protein 4 OS=Homo sapiens OX=9606 GN=TMED4 PE=1 SV=1	Q7Z7H5	0.901984	0.883525	0.8096	0.982609	0.782428	0.78059	0.815988	0.783511	0.85595	TMED4	T4	0.177076	OUT
sp|Q8IZ81|ELMD2_HUMAN	ELMO domain-containing protein 2 OS=Homo sapiens OX=9606 GN=ELMOD2 PE=1 SV=1	Q8IZ81	0.0456371	0.0588138	0.0426297	0.0518517	0.00778254	0.0432794	0.0342296	0.0550814	0.04851	ELMOD2	T4	0.240604	OUT
sp|Q8N2K0|ABD12_HUMAN	Lysophosphatidylserine lipase ABHD12 OS=Homo sapiens OX=9606 GN=ABHD12 PE=1 SV=2	Q8N2K0	0.0129591	0.00659546	0.0317013	0.0270211	0.0356542	0.021239	0.0464151	0.0392062	0.0185051	ABHD12	T4	0.366164	L2
sp|Q8NI27|THOC2_HUMAN	THO complex subunit 2 OS=Homo sapiens OX=9606 GN=THOC2 PE=1 SV=2	Q8NI27	0.817515	0.254416	0.111545	0.13921	0.311919	0.38634	0.456066	0.303269	0.382004	THOC2	T4	-0.135262	OUT
sp|Q8TC12|RDH11_HUMAN	Retinol dehydrogenase 11 OS=Homo sapiens OX=9606 GN=RDH11 PE=1 SV=2	Q8TC12	0.992735	0.983851	0.935793	0.990535	0.95081	0.946569	0.939516	0.955401	0.783891	RDH11	T4	-0.932654	OUT
sp|Q8TEM1|PO210_HUMAN	Nuclear pore membrane glycoprotein 210 OS=Homo sapiens OX=9606 GN=NUP210 PE=1 SV=3	Q8TEM1	0.346219	0.290507	0.372109	0.397761	0.732217	0.455493	0.873271	0.720949	0.671555	NUP210	T4	-0.131615	OUT
sp|Q92504|S39A7_HUMAN	Zinc transporter SLC39A7 OS=Homo sapiens OX=9606 GN=SLC39A7 PE=1 SV=2	Q92504	0.141636	0.104033	0.0498274	0.00737457	0.0358313	0.0482235	0.279342	0.0478373	0.0469532	SLC39A7	T4	-0.609579	OUT
sp|Q92597|NDRG1_HUMAN	Protein NDRG1 OS=Homo sapiens OX=9606 GN=NDRG1 PE=1 SV=1	Q92597	0.00187131	0.000889487	0.0657696	0.00622387	0.0762844	0.0744782	0.00323437	0.122933	0.0292975	NDRG1	T4	0	OUT
sp|Q96A33|CCD47_HUMAN	Coiled-coil domain-containing protein 47 OS=Homo sapiens OX=9606 GN=CCDC47 PE=1 SV=1	Q96A33	0.215408	0.288481	0.204519	0.277642	0.172766	0.0063912	0.203569	0.195643	0.197435	CCDC47	T4	0.463338	OUT
sp|Q96AA3|RFT1_HUMAN	Protein RFT1 homolog OS=Homo sapiens OX=9606 GN=RFT1 PE=1 SV=1	Q96AA3	0.15351	0.336814	0.423037	0.264317	0.280393	0.262091	0.271148	0.212144	0.253451	RFT1	T4	0.524991	OUT
sp|Q96N66|MBOA7_HUMAN	Lysophospholipid acyltransferase 7 OS=Homo sapiens OX=9606 GN=MBOAT7 PE=1 SV=2	Q96N66	0.395487	0.499937	0.293909	0.358144	0.308048	0.293869	0.247644	0.238285	0.403638	MBOAT7	T4	-0.837917	OUT
sp|Q96SQ9|CP2S1_HUMAN	Cytochrome P450 2S1 OS=Homo sapiens OX=9606 GN=CYP2S1 PE=1 SV=2	Q96SQ9	0.15376	0.0967238	0.122615	0.0969524	0.0787488	0.115236	0.0971269	0.0883159	0.126717	CYP2S1	T4	-0.442116	OUT
sp|Q99720|SGMR1_HUMAN	Sigma non-opioid intracellular receptor 1 OS=Homo sapiens OX=9606 GN=SIGMAR1 PE=1 SV=1	Q99720	0.0772437	0.107426	0.137657	0.0490381	0.125651	0.0917961	0.163116	0.0824861	0.207458	SIGMAR1	T4	0	OUT
sp|Q9BSJ8|ESYT1_HUMAN	Extended synaptotagmin-1 OS=Homo sapiens OX=9606 GN=ESYT1 PE=1 SV=1	Q9BSJ8	0.00184177	0.00209909	0.0105337	0.0126147	0.00630441	0.00529106	0.00942212	0.00452976	0.00668682	ESYT1	T4	1.64786	L1
sp|Q9BVC6|TM109_HUMAN	Transmembrane protein 109 OS=Homo sapiens OX=9606 GN=TMEM109 PE=1 SV=1	Q9BVC6	0.332125	0.361527	0.332012	0.304495	0.0917729	0.284658	0.450664	0.387172	0.173123	TMEM109	T4	0.730864	OUT
sp|Q9BVK6|TMED9_HUMAN	Transmembrane emp24 domain-containing protein 9 OS=Homo sapiens OX=9606 GN=TMED9 PE=1 SV=2	Q9BVK6	0.0197294	0.0139294	0.0167394	0.00840599	0.0107318	0.0188516	0.0185809	0.0105632	0.0247276	TMED9	T4	-0.563083	OUT
sp|Q9BW60|ELOV1_HUMAN	Elongation of very long chain fatty acids protein 1 OS=Homo sapiens OX=9606 GN=ELOVL1 PE=1 SV=1	Q9BW60	0.00435252	0.622462	0.34573	0.371858	0.70152	0.43439	0.417189	0.343216	0.318071	ELOVL1	T4	1.10319	L1
sp|Q9GZU7|CTDS1_HUMAN	Carboxy-terminal domain RNA polymerase II polypeptide A small phosphatase 1 OS=Homo sapiens OX=9606 GN=CTDSP1 PE=1 SV=1	Q9GZU7	0.644244	0.782135	0.133737	0.133783	0.175957	0.477578	0.120912	0.159766	0.0955126	CTDSP1	T4	0	OUT
sp|Q9H3H5|GPT_HUMAN	UDP-N-acetylglucosamine--dolichyl-phosphate N-acetylglucosaminephosphotransferase OS=Homo sapiens OX=9606 GN=DPAGT1 PE=1 SV=2	Q9H3H5	0.761271	0.490444	0.830928	0.38729	0.808498	0.710506	0.494579	0.695513	0.826939	DPAGT1	T4	-1.21189	OUT
sp|Q9H4M9|EHD1_HUMAN	EH domain-containing protein 1 OS=Homo sapiens OX=9606 GN=EHD1 PE=1 SV=2	Q9H4M9	0.00870297	0.0563928	0.0540946	0.0513045	0.0587922	0.0874737	0.0171363	0.0591056	0.0929587	EHD1	T4	0	OUT
sp|Q9H9B4|SFXN1_HUMAN	Sideroflexin-1 OS=Homo sapiens OX=9606 GN=SFXN1 PE=1 SV=4	Q9H9B4	0.0182986	0.0500285	0.015918	0.00925538	0.0109881	0.00735489	0.00617108	0.0110457	0.0363103	SFXN1	T4	-0.599157	OUT
sp|Q9HD20|AT131_HUMAN	Manganese-transporting ATPase 13A1 OS=Homo sapiens OX=9606 GN=ATP13A1 PE=1 SV=2	Q9HD20	0.0197929	0.0205213	0.0505286	0.164179	0.107033	0.105079	0.132563	0.058551	0.0715082	ATP13A1	T4	0	OUT
sp|Q9NS69|TOM22_HUMAN	Mitochondrial import receptor subunit TOM22 homolog OS=Homo sapiens OX=9606 GN=TOMM22 PE=1 SV=3	Q9NS69	0.0138716	0.0201408	0.00990493	0.00652846	0.0132747	0.00343414	0.00588357	0.0133847	0.0160729	TOMM22	T4	-0.166244	OUT
sp|Q9NZ01|TECR_HUMAN	Very-long-chain enoyl-CoA reductase OS=Homo sapiens OX=9606 GN=TECR PE=1 SV=1	Q9NZ01	0.149876	0.0911914	0.0865977	0.0472442	0.117755	0.0970008	0.00258338	0.0617067	0.0362808	TECR	T4	-0.0988454	OUT
sp|Q9P0L0|VAPA_HUMAN	Vesicle-associated membrane protein-associated protein A OS=Homo sapiens OX=9606 GN=VAPA PE=1 SV=3	Q9P0L0	0.0264438	0.025177	0.0123329	0.0154431	0.0195518	0.0354727	0.0193727	0.0192744	0.0157082	VAPA	T4	0.0498818	OUT
sp|Q9P2E9|RRBP1_HUMAN	Ribosome-binding protein 1 OS=Homo sapiens OX=9606 GN=RRBP1 PE=1 SV=5	Q9P2E9	0.0291244	0.0568554	0.132502	0.0162528	0.0397838	0.0454975	0.00553325	0.0521227	0.0435194	RRBP1	T4	2.42358	L1
sp|Q9UBV2|SE1L1_HUMAN	Protein sel-1 homolog 1 OS=Homo sapiens OX=9606 GN=SEL1L PE=1 SV=3	Q9UBV2	0.404146	0.315552	0.234283	0.32204	0.222923	0.3304	0.155937	0.180249	0.35282	SEL1L	T4	-0.290602	OUT
sp|Q9UGT4|SUSD2_HUMAN	Sushi domain-containing protein 2 OS=Homo sapiens OX=9606 GN=SUSD2 PE=1 SV=1	Q9UGT4	0.00554394	0.00491732	0.0110599	0.0107019	0.0122878	0.0127604	0.0126818	0.0123028	0.0201082	SUSD2	T4	-0.0831628	OUT
sp|Q9UJS0|CMC2_HUMAN	Calcium-binding mitochondrial carrier protein Aralar2 OS=Homo sapiens OX=9606 GN=SLC25A13 PE=1 SV=2	Q9UJS0	0.0243752	0.0280525	0.0180443	0.0181844	0.0172008	0.0339676	0.0148918	0.0212972	0.0396779	SLC25A13	T4	-0.115417	OUT
sp|Q9Y241|HIG1A_HUMAN	HIG1 domain family member 1A, mitochondrial OS=Homo sapiens OX=9606 GN=HIGD1A PE=1 SV=1	Q9Y241	0.0597187	0.0234947	0.00018915	0.0172824	0.00434959	0.000116997	0.0103478	0.197974	0.00260583	HIGD1A	T4	-0.271335	OUT
sp|Q9Y282|ERGI3_HUMAN	Endoplasmic reticulum-Golgi intermediate compartment protein 3 OS=Homo sapiens OX=9606 GN=ERGIC3 PE=1 SV=1	Q9Y282	0.10999	0.0111157	0.0767454	0.135408	0.0769911	0.130907	0.101029	0.137125	0.177637	ERGIC3	T4	0.0909771	OUT
sp|Q9Y4P3|TBL2_HUMAN	Transducin beta-like protein 2 OS=Homo sapiens OX=9606 GN=TBL2 PE=1 SV=1	Q9Y4P3	0.768334	0.781912	0.623103	0.689087	0.622756	0.711674	0.570777	0.636693	0.672191	TBL2	T4	-0.586232	OUT
sp|Q9Y4W6|AFG32_HUMAN	AFG3-like protein 2 OS=Homo sapiens OX=9606 GN=AFG3L2 PE=1 SV=2	Q9Y4W6	0.317363	0.572322	0.287992	0.497772	0.275529	0.187112	0.350087	0.325701	0.535595	AFG3L2	T4	0	OUT
sp|Q9Y5M8|SRPRB_HUMAN	Signal recognition particle receptor subunit beta OS=Homo sapiens OX=9606 GN=SRPRB PE=1 SV=3	Q9Y5M8	0.0678114	0.0415164	0.050663	0.0668038	0.0353055	0.0660043	0.0391076	0.0484109	0.0518512	SRPRB	T4	1.51165	L1
sp|Q9Y5U8|MPC1_HUMAN	Mitochondrial pyruvate carrier 1 OS=Homo sapiens OX=9606 GN=MPC1 PE=1 SV=1	Q9Y5U8	0.165134	0.34049	0.273673	0.230659	0.239495	0.247357	0.273333	0.246637	0.313707	MPC1	T4	0	OUT
sp|Q9Y5U9|IR3IP_HUMAN	Immediate early response 3-interacting protein 1 OS=Homo sapiens OX=9606 GN=IER3IP1 PE=1 SV=1	Q9Y5U9	0.366656	0.579665	0.245806	0.0240416	0.266911	0.219106	0.147882	0.493826	0.235512	IER3IP1	T4	-0.835726	OUT
sp|Q9Y6C9|MTCH2_HUMAN	Mitochondrial carrier homolog 2 OS=Homo sapiens OX=9606 GN=MTCH2 PE=1 SV=1	Q9Y6C9	0.464727	0.307397	0.434254	0.540707	0.445915	0.394441	0.471436	0.453587	0.501996	MTCH2	T4	0.159257	OUT
