# Supplementary material for: A proximity labeling method for protein–protein interactions on cell membrane
Source: Chem Sci. 2022 Apr 30;13(20):6028–38. doi: 10.1039/d1sc06898a (PMC9132088; doi:10.1039/d1sc06898a)
Supplement: SC-013-D1SC06898A-s005 [file SC-013-D1SC06898A-s005.xlsx]

## Sheet: DifCaco2_filtspec
Query #:z	Protein Rank	Peptide < ProteinMetrics Confidential >	Glycans.NHFAGNa	Modification.Types	Observed m/z	z	Observed (M+H)	Calc. mass (M+H)	Off-by-x error	Mass error (ppm)	Starting position	Cleavage	Score	Delta	Delta.Mod	X.Log.Prob.	# of unique peptides	Protein.Name	Protein DB number	Comment	Scan #	Scan Time
06801:3	1	R.AN[+2262.814]GTTYATYER.G	HexNAc(5)Hex(5)Fuc(1)NeuAc(1)	N[+2263]	1170.47	3	3509.39	3509.38	0	2.2	436	Specific	412.02	166.7	166.7	5.92	175	>sp|P14410|SUIS_HUMAN Sucrase-isomaltase, intestinal OS=Homo sapiens GN=SI PE=1 SV=6	16726	Caco2P7_diffgpep1.7526.7526.3	controllerType=0 controllerNumber=1 scan=7526	34.8624
17461:4	1	R.KNPLGLIVALGEN[+2684.968]NTAK.G	HexNAc(7)Hex(6)Fuc(0)NeuAc(1)	N[+2685]	1110	4	4436.99	4436.97	0	4	811	Specific	163.49	135.67	17.53	3.37	175	>sp|P14410|SUIS_HUMAN Sucrase-isomaltase, intestinal OS=Homo sapiens GN=SI PE=1 SV=6	16726	Caco2P7_diffgpep1.16457.16457.4	controllerType=0 controllerNumber=1 scan=16457	78.2357
19729:4	1	R.KNPLGLIVALGEN[+3139.137]NTAK.G	HexNAc(7)Hex(7)Fuc(2)NeuAc(1)	N[+3139]	1223.54	4	4891.14	4891.14	0	-0.2	811	Specific	171.67	93.26	19.43	2.32	175	>sp|P14410|SUIS_HUMAN Sucrase-isomaltase, intestinal OS=Homo sapiens GN=SI PE=1 SV=6	16726	Caco2P7_diffgpep1.18250.18250.4	controllerType=0 controllerNumber=1 scan=18250	86.8379
19931:4	1	R.KNPLGLIVALGEN[+2627.947]NTAK.G	HexNAc(6)Hex(6)Fuc(1)NeuAc(1)	N[+2628]	1095.75	4	4379.97	4379.95	0	4.5	811	Specific	196.04	134.75	11.94	2.05	175	>sp|P14410|SUIS_HUMAN Sucrase-isomaltase, intestinal OS=Homo sapiens GN=SI PE=1 SV=6	16726	Caco2P7_diffgpep1.18418.18418.4	controllerType=0 controllerNumber=1 scan=18418	87.6202
18223:3	1	R.KNPLGLIVALGEN[+1647.613]NTAK.G	HexNAc(5)Hex(3)Fuc(1)NeuAc(0)	N[+1648]	1133.88	3	3399.62	3399.61	0	1.4	811	Specific	205.71	154.57	154.57	3.27	175	>sp|P14410|SUIS_HUMAN Sucrase-isomaltase, intestinal OS=Homo sapiens GN=SI PE=1 SV=6	16726	Caco2P7_diffgpep1.17034.17034.3	controllerType=0 controllerNumber=1 scan=17034	81.0749
17106:4	1	R.KNPLGLIVALGEN[+3066.120]NTAK.G	HexNAc(6)Hex(6)Fuc(4)NeuAc(1)	N[+3066]	1205.29	4	4818.12	4818.12	0	0.5	811	Specific	209.3	180.67	28.86	2.41	175	>sp|P14410|SUIS_HUMAN Sucrase-isomaltase, intestinal OS=Homo sapiens GN=SI PE=1 SV=6	16726	Caco2P7_diffgpep1.16176.16176.4	controllerType=0 controllerNumber=1 scan=16176	76.8213
19906:4	1	R.KNPLGLIVALGEN[+3139.137]NTAK.G	HexNAc(7)Hex(7)Fuc(2)NeuAc(1)	N[+3139]	1223.3	4	4890.16	4891.14	-1	4.8	811	Specific	212.17	163.53	12.6	2.2	175	>sp|P14410|SUIS_HUMAN Sucrase-isomaltase, intestinal OS=Homo sapiens GN=SI PE=1 SV=6	16726	Caco2P7_diffgpep1.18396.18396.4	controllerType=0 controllerNumber=1 scan=18396	87.5163
19965:4	1	R.KNPLGLIVALGEN[+2936.057]NTAK.G	HexNAc(6)Hex(7)Fuc(2)NeuAc(1)	N[+2936]	1172.52	4	4687.06	4688.06	-1	2	811	Specific	213.22	142.35	21.19	4.22	175	>sp|P14410|SUIS_HUMAN Sucrase-isomaltase, intestinal OS=Homo sapiens GN=SI PE=1 SV=6	16726	Caco2P7_diffgpep1.18445.18445.4	controllerType=0 controllerNumber=1 scan=18445	87.7511
17498:3	1	R.KNPLGLIVALGEN[+2538.935]NTAK.G	HexNAc(5)Hex(4)Fuc(4)NeuAc(1)	N[+2539]	1431.32	3	4291.95	4290.94	1	3.3	811	Specific	214.5	143.78	38.97	4.31	175	>sp|P14410|SUIS_HUMAN Sucrase-isomaltase, intestinal OS=Homo sapiens GN=SI PE=1 SV=6	16726	Caco2P7_diffgpep1.16484.16484.3	controllerType=0 controllerNumber=1 scan=16484	78.3716
17442:4	1	R.KNPLGLIVALGEN[+2993.079]NTAK.G	HexNAc(7)Hex(7)Fuc(1)NeuAc(1)	N[+2993]	1187.29	4	4746.12	4745.08	1	7.3	811	Specific	247.46	160.91	19.27	4.45	175	>sp|P14410|SUIS_HUMAN Sucrase-isomaltase, intestinal OS=Homo sapiens GN=SI PE=1 SV=6	16726	Caco2P7_diffgpep1.16441.16441.4	controllerType=0 controllerNumber=1 scan=16441	78.1556
17627:3	1	R.KNPLGLIVALGEN[+2538.935]NTAK.G	HexNAc(5)Hex(4)Fuc(4)NeuAc(1)	N[+2539]	1430.99	3	4290.95	4290.94	0	2.6	811	Specific	253.23	199.66	19.33	6.13	175	>sp|P14410|SUIS_HUMAN Sucrase-isomaltase, intestinal OS=Homo sapiens GN=SI PE=1 SV=6	16726	Caco2P7_diffgpep1.16578.16578.3	controllerType=0 controllerNumber=1 scan=16578	78.8455
20056:3	1	R.KNPLGLIVALGEN[+2627.947]NTAK.G	HexNAc(6)Hex(6)Fuc(1)NeuAc(1)	N[+2628]	1460.33	3	4378.97	4379.95	-1	6.2	811	Specific	256.58	152.67	152.67	5.43	175	>sp|P14410|SUIS_HUMAN Sucrase-isomaltase, intestinal OS=Homo sapiens GN=SI PE=1 SV=6	16726	Caco2P7_diffgpep1.18512.18512.3	controllerType=0 controllerNumber=1 scan=18512	88.0802
18096:3	1	R.KNPLGLIVALGEN[+1971.719]NTAK.G	HexNAc(5)Hex(5)Fuc(1)NeuAc(0)	N[+1972]	1241.92	3	3723.73	3723.72	0	3.9	811	Specific	272.63	149.78	149.78	6.15	175	>sp|P14410|SUIS_HUMAN Sucrase-isomaltase, intestinal OS=Homo sapiens GN=SI PE=1 SV=6	16726	Caco2P7_diffgpep1.16930.16930.3	controllerType=0 controllerNumber=1 scan=16930	80.5801
19914:4	1	R.KNPLGLIVALGEN[+2936.057]NTAK.G	HexNAc(6)Hex(7)Fuc(2)NeuAc(1)	N[+2936]	1172.78	4	4688.09	4688.06	0	5.7	811	Specific	278.26	243.53	16.1	5.83	175	>sp|P14410|SUIS_HUMAN Sucrase-isomaltase, intestinal OS=Homo sapiens GN=SI PE=1 SV=6	16726	Caco2P7_diffgpep1.18403.18403.4	controllerType=0 controllerNumber=1 scan=18403	87.5504
20138:4	1	R.KNPLGLIVALGEN[+2262.814]NTAK.G	HexNAc(5)Hex(5)Fuc(1)NeuAc(1)	N[+2263]	1004.46	4	4014.82	4014.82	0	0.4	811	Specific	281.94	206.99	31.08	6.21	175	>sp|P14410|SUIS_HUMAN Sucrase-isomaltase, intestinal OS=Homo sapiens GN=SI PE=1 SV=6	16726	Caco2P7_diffgpep1.18579.18579.4	controllerType=0 controllerNumber=1 scan=18579	88.4006
17407:3	1	R.KNPLGLIVALGEN[+2700.988]NTAK.G	HexNAc(5)Hex(5)Fuc(4)NeuAc(1)	N[+2701]	1485.34	3	4454	4452.99	1	2	811	Specific	287.59	252.73	23.81	6.67	175	>sp|P14410|SUIS_HUMAN Sucrase-isomaltase, intestinal OS=Homo sapiens GN=SI PE=1 SV=6	16726	Caco2P7_diffgpep1.16414.16414.3	controllerType=0 controllerNumber=1 scan=16414	78.0205
17356:4	1	R.KNPLGLIVALGEN[+2700.988]NTAK.G	HexNAc(5)Hex(5)Fuc(4)NeuAc(1)	N[+2701]	1114.25	4	4454	4452.99	1	0.8	811	Specific	332.98	251.54	29.27	6.51	175	>sp|P14410|SUIS_HUMAN Sucrase-isomaltase, intestinal OS=Homo sapiens GN=SI PE=1 SV=6	16726	Caco2P7_diffgpep1.16373.16373.4	controllerType=0 controllerNumber=1 scan=16373	77.7996
18030:4	1	R.KNPLGLIVALGEN[+1971.719]NTAK.G	HexNAc(5)Hex(5)Fuc(1)NeuAc(0)	N[+1972]	931.687	4	3723.73	3723.72	0	1.7	811	Specific	339.16	177.1	177.1	6.33	175	>sp|P14410|SUIS_HUMAN Sucrase-isomaltase, intestinal OS=Homo sapiens GN=SI PE=1 SV=6	16726	Caco2P7_diffgpep1.16884.16884.4	controllerType=0 controllerNumber=1 scan=16884	80.3571
17561:3	1	R.KNPLGLIVALGEN[+2336.851]NTAK.G	HexNAc(6)Hex(6)Fuc(1)NeuAc(0)	N[+2337]	1363.62	3	4088.85	4088.85	0	-0.1	811	Specific	355.64	227.53	227.53	6.44	175	>sp|P14410|SUIS_HUMAN Sucrase-isomaltase, intestinal OS=Homo sapiens GN=SI PE=1 SV=6	16726	Caco2P7_diffgpep1.16530.16530.3	controllerType=0 controllerNumber=1 scan=16530	78.6025
17873:3	1	R.KNPLGLIVALGEN[+1809.666]NTAK.G	HexNAc(5)Hex(4)Fuc(1)NeuAc(0)	N[+1810]	1187.89	3	3561.67	3561.67	0	0	811	Specific	385.9	191.26	191.26	6.48	175	>sp|P14410|SUIS_HUMAN Sucrase-isomaltase, intestinal OS=Homo sapiens GN=SI PE=1 SV=6	16726	Caco2P7_diffgpep1.16767.16767.3	controllerType=0 controllerNumber=1 scan=16767	79.7887
20099:4	1	R.KNPLGLIVALGEN[+2627.947]NTAK.G	HexNAc(6)Hex(6)Fuc(1)NeuAc(1)	N[+2628]	1095.74	4	4379.96	4379.95	0	2.1	811	Specific	394.31	335.46	24.02	7.08	175	>sp|P14410|SUIS_HUMAN Sucrase-isomaltase, intestinal OS=Homo sapiens GN=SI PE=1 SV=6	16726	Caco2P7_diffgpep1.18549.18549.4	controllerType=0 controllerNumber=1 scan=18549	88.2534
17795:3	1	R.KNPLGLIVALGEN[+2336.851]NTAK.G	HexNAc(6)Hex(6)Fuc(1)NeuAc(0)	N[+2337]	1363.62	3	4088.86	4088.85	0	1.8	811	Specific	407.37	278.54	278.54	7.18	175	>sp|P14410|SUIS_HUMAN Sucrase-isomaltase, intestinal OS=Homo sapiens GN=SI PE=1 SV=6	16726	Caco2P7_diffgpep1.16705.16705.3	controllerType=0 controllerNumber=1 scan=16705	79.4749
17823:3	1	R.KNPLGLIVALGEN[+2117.777]NTAK.G	HexNAc(5)Hex(5)Fuc(2)NeuAc(0)	N[+2118]	1290.6	3	3869.78	3869.78	0	0	811	Specific	411.68	237.2	237.2	6.74	175	>sp|P14410|SUIS_HUMAN Sucrase-isomaltase, intestinal OS=Homo sapiens GN=SI PE=1 SV=6	16726	Caco2P7_diffgpep1.16729.16729.3	controllerType=0 controllerNumber=1 scan=16729	79.5979
17819:4	1	R.KNPLGLIVALGEN[+1971.719]NTAK.G	HexNAc(5)Hex(5)Fuc(1)NeuAc(0)	N[+1972]	931.688	4	3723.73	3723.72	0	2.4	811	Specific	432.58	241.23	241.23	6.8	175	>sp|P14410|SUIS_HUMAN Sucrase-isomaltase, intestinal OS=Homo sapiens GN=SI PE=1 SV=6	16726	Caco2P7_diffgpep1.16725.16725.4	controllerType=0 controllerNumber=1 scan=16725	79.5758
17935:3	1	R.KNPLGLIVALGEN[+1971.719]NTAK.G	HexNAc(5)Hex(5)Fuc(1)NeuAc(0)	N[+1972]	1241.91	3	3723.73	3723.72	0	2.4	811	Specific	506.08	313.34	313.34	7.5	175	>sp|P14410|SUIS_HUMAN Sucrase-isomaltase, intestinal OS=Homo sapiens GN=SI PE=1 SV=6	16726	Caco2P7_diffgpep1.16813.16813.3	controllerType=0 controllerNumber=1 scan=16813	80.0149
20287:3	1	R.KNPLGLIVALGEN[+2262.814]NTAK.G	HexNAc(5)Hex(5)Fuc(1)NeuAc(1)	N[+2263]	1338.95	3	4014.83	4014.82	0	2.7	811	Specific	510.61	387.55	56.99	9.37	175	>sp|P14410|SUIS_HUMAN Sucrase-isomaltase, intestinal OS=Homo sapiens GN=SI PE=1 SV=6	16726	Caco2P7_diffgpep1.18693.18693.3	controllerType=0 controllerNumber=1 scan=18693	88.9528
20447:3	1	R.KNPLGLIVALGEN[+2262.814]NTAK.G	HexNAc(5)Hex(5)Fuc(1)NeuAc(1)	N[+2263]	1338.61	3	4013.82	4014.82	-1	2.5	811	Specific	512.11	400.13	400.13	9.35	175	>sp|P14410|SUIS_HUMAN Sucrase-isomaltase, intestinal OS=Homo sapiens GN=SI PE=1 SV=6	16726	Caco2P7_diffgpep1.18821.18821.3	controllerType=0 controllerNumber=1 scan=18821	89.5896
17770:3	1	R.KNPLGLIVALGEN[+1971.719]NTAK.G	HexNAc(5)Hex(5)Fuc(1)NeuAc(0)	N[+1972]	1241.92	3	3723.73	3723.72	0	3.2	811	Specific	533.39	389.61	389.61	9.47	175	>sp|P14410|SUIS_HUMAN Sucrase-isomaltase, intestinal OS=Homo sapiens GN=SI PE=1 SV=6	16726	Caco2P7_diffgpep1.16686.16686.3	controllerType=0 controllerNumber=1 scan=16686	79.3793
17943:3	1	R.KNPLGLIVALGEN[+1971.719]NTAK.G	HexNAc(5)Hex(5)Fuc(1)NeuAc(0)	N[+1972]	1241.91	3	3723.73	3723.72	0	2	811	Specific	580.19	494.28	494.28	11.19	175	>sp|P14410|SUIS_HUMAN Sucrase-isomaltase, intestinal OS=Homo sapiens GN=SI PE=1 SV=6	16726	Caco2P7_diffgpep1.16819.16819.3	controllerType=0 controllerNumber=1 scan=16819	80.0419
17868:3	1	R.KNPLGLIVALGEN[+1864.634]NTAK.G	HexNAc(2)Hex(9)Fuc(0)NeuAc(0)	N[+1865]	1206.22	3	3616.65	3616.64	0	3.5	811	Specific	601.37	363.55	363.55	10.63	175	>sp|P14410|SUIS_HUMAN Sucrase-isomaltase, intestinal OS=Homo sapiens GN=SI PE=1 SV=6	16726	Caco2P7_diffgpep1.16763.16763.3	controllerType=0 controllerNumber=1 scan=16763	79.7667
18049:3	1	R.KNPLGLIVALGEN[+1809.666]NTAK.G	HexNAc(5)Hex(4)Fuc(1)NeuAc(0)	N[+1810]	1187.9	3	3561.68	3561.67	0	2.5	811	Specific	621.22	551.81	551.81	12.05	175	>sp|P14410|SUIS_HUMAN Sucrase-isomaltase, intestinal OS=Homo sapiens GN=SI PE=1 SV=6	16726	Caco2P7_diffgpep1.16898.16898.3	controllerType=0 controllerNumber=1 scan=16898	80.4254
20336:4	1	R.KNPLGLIVALGEN[+2262.814]NTAK.G	HexNAc(5)Hex(5)Fuc(1)NeuAc(1)	N[+2263]	1004.46	4	4014.82	4014.82	0	1.4	811	Specific	627.2	560.09	31.62	11.95	175	>sp|P14410|SUIS_HUMAN Sucrase-isomaltase, intestinal OS=Homo sapiens GN=SI PE=1 SV=6	16726	Caco2P7_diffgpep1.18732.18732.4	controllerType=0 controllerNumber=1 scan=18732	89.1427
24346:3	1	K.NPLGLIVALGEN[+2262.814]NTAK.G	HexNAc(5)Hex(5)Fuc(1)NeuAc(1)	N[+2263]	1296.25	3	3886.74	3886.72	0	4.1	812	Specific	216.48	66.93	66.93	2.23	175	>sp|P14410|SUIS_HUMAN Sucrase-isomaltase, intestinal OS=Homo sapiens GN=SI PE=1 SV=6	16726	Caco2P7_diffgpep1.22324.22324.3	controllerType=0 controllerNumber=1 scan=22324	105.404
24572:4	1	R.VAENNQPMNAHSN[+2116.756]FTYDASNQVLLIADLK.L	HexNAc(5)Hex(5)Fuc(0)NeuAc(1)	N[+2117]	1334.1	4	5333.36	5334.31	-1	9.2	892	Specific	249.45	244.93	244.93	5.16	175	>sp|P14410|SUIS_HUMAN Sucrase-isomaltase, intestinal OS=Homo sapiens GN=SI PE=1 SV=6	16726	Caco2P7_diffgpep1.22548.22548.4	controllerType=0 controllerNumber=1 scan=22548	106.388
24724:4	1	R.VAENNQPMNAHSN[+1913.677]FTYDASNQVLLIADLK.L	HexNAc(4)Hex(5)Fuc(0)NeuAc(1)	N[+1914]	1283.81	4	5132.22	5131.24	1	-3	892	Specific	253.34	157.08	47.58	4.88	175	>sp|P14410|SUIS_HUMAN Sucrase-isomaltase, intestinal OS=Homo sapiens GN=SI PE=1 SV=6	16726	Caco2P7_diffgpep1.22685.22685.4	controllerType=0 controllerNumber=1 scan=22685	107.012
22995:4	1	R.VAENNQPMNAHSN[+1825.661]FTYDASNQVLLIADLK.L	HexNAc(5)Hex(5)Fuc(0)NeuAc(0)	N[+1826]	1261.56	4	5043.21	5043.22	0	-1.1	892	Specific	283.34	203.06	203.06	5.52	175	>sp|P14410|SUIS_HUMAN Sucrase-isomaltase, intestinal OS=Homo sapiens GN=SI PE=1 SV=6	16726	Caco2P7_diffgpep1.21020.21020.4	controllerType=0 controllerNumber=1 scan=21020	99.6073
24754:4	1	R.VAENNQPMNAHSN[+1913.677]FTYDASNQVLLIADLK.L	HexNAc(4)Hex(5)Fuc(0)NeuAc(1)	N[+1914]	1283.82	4	5132.26	5131.24	1	5	892	Specific	310.11	146.87	29.95	5.58	175	>sp|P14410|SUIS_HUMAN Sucrase-isomaltase, intestinal OS=Homo sapiens GN=SI PE=1 SV=6	16726	Caco2P7_diffgpep1.22719.22719.4	controllerType=0 controllerNumber=1 scan=22719	107.157
24013:4	1	R.VAENNQPMNAHSN[+2278.809]FTYDASNQVLLIADLK.L	HexNAc(5)Hex(6)Fuc(0)NeuAc(1)	N[+2279]	1374.6	4	5495.39	5496.37	-1	5.4	892	Specific	324.31	239.1	239.1	5.87	175	>sp|P14410|SUIS_HUMAN Sucrase-isomaltase, intestinal OS=Homo sapiens GN=SI PE=1 SV=6	16726	Caco2P7_diffgpep1.21966.21966.4	controllerType=0 controllerNumber=1 scan=21966	103.857
22412:4	1	R.VAENNQPMNAHSN[+1825.661]FTYDASNQVLLIADLK.L	HexNAc(5)Hex(5)Fuc(0)NeuAc(0)	N[+1826]	1261.57	4	5043.25	5043.22	0	6	892	Specific	333.12	247.7	247.7	5.91	175	>sp|P14410|SUIS_HUMAN Sucrase-isomaltase, intestinal OS=Homo sapiens GN=SI PE=1 SV=6	16726	Caco2P7_diffgpep1.20513.20513.4	controllerType=0 controllerNumber=1 scan=20513	97.3223
22297:4	1	R.VAENNQPMNAHSN[+1622.582]FTYDASNQVLLIADLK.L	HexNAc(4)Hex(5)Fuc(0)NeuAc(0)	N[+1623]	1211.04	4	4841.14	4840.14	1	-0.1	892	Specific	369.05	263.38	263.38	6.26	175	>sp|P14410|SUIS_HUMAN Sucrase-isomaltase, intestinal OS=Homo sapiens GN=SI PE=1 SV=6	16726	Caco2P7_diffgpep1.20430.20430.4	controllerType=0 controllerNumber=1 scan=20430	96.9249
24593:4	1	R.VAENNQPMNAHSN[+1913.677]FTYDASNQVLLIADLK.L	HexNAc(4)Hex(5)Fuc(0)NeuAc(1)	N[+1914]	1283.81	4	5132.22	5131.24	1	-2.9	892	Specific	417.37	268.95	48.44	6.02	175	>sp|P14410|SUIS_HUMAN Sucrase-isomaltase, intestinal OS=Homo sapiens GN=SI PE=1 SV=6	16726	Caco2P7_diffgpep1.22565.22565.4	controllerType=0 controllerNumber=1 scan=22565	106.469
22392:4	1	R.VAENNQPMNAHSN[+1663.608]FTYDASNQVLLIADLK.L	HexNAc(5)Hex(4)Fuc(0)NeuAc(0)	N[+1664]	1221.05	4	4881.19	4881.17	0	4.9	892	Specific	534.01	352.31	352.31	7.19	175	>sp|P14410|SUIS_HUMAN Sucrase-isomaltase, intestinal OS=Homo sapiens GN=SI PE=1 SV=6	16726	Caco2P7_diffgpep1.20497.20497.4	controllerType=0 controllerNumber=1 scan=20497	97.2472
24108:4	1	R.VAENNQPMNAHSN[+2116.756]FTYDASNQVLLIADLK.L	HexNAc(5)Hex(5)Fuc(0)NeuAc(1)	N[+2117]	1334.34	4	5334.33	5334.31	0	3.2	892	Specific	543.22	356.57	29.58	7.68	175	>sp|P14410|SUIS_HUMAN Sucrase-isomaltase, intestinal OS=Homo sapiens GN=SI PE=1 SV=6	16726	Caco2P7_diffgpep1.22052.22052.4	controllerType=0 controllerNumber=1 scan=22052	104.235
24251:4	1	R.VAENNQPMNAHSN[+2116.756]FTYDASNQVLLIADLK.L	HexNAc(5)Hex(5)Fuc(0)NeuAc(1)	N[+2117]	1334.34	4	5334.32	5334.31	0	1.3	892	Specific	543.27	316.66	39.34	7.52	175	>sp|P14410|SUIS_HUMAN Sucrase-isomaltase, intestinal OS=Homo sapiens GN=SI PE=1 SV=6	16726	Caco2P7_diffgpep1.22210.22210.4	controllerType=0 controllerNumber=1 scan=22210	104.944
24183:4	1	R.VAENNQPMNAHSN[+2116.756]FTYDASNQVLLIADLK.L	HexNAc(5)Hex(5)Fuc(0)NeuAc(1)	N[+2117]	1334.34	4	5334.33	5334.31	0	2.7	892	Specific	617.08	393.26	32.57	11.68	175	>sp|P14410|SUIS_HUMAN Sucrase-isomaltase, intestinal OS=Homo sapiens GN=SI PE=1 SV=6	16726	Caco2P7_diffgpep1.22140.22140.4	controllerType=0 controllerNumber=1 scan=22140	104.629
22227:4	1	R.VAENNQPMNAHSN[+1825.661]FTYDASNQVLLIADLK.L	HexNAc(5)Hex(5)Fuc(0)NeuAc(0)	N[+1826]	1261.57	4	5043.25	5043.22	0	6.1	892	Specific	617.09	416.02	416.02	11.23	175	>sp|P14410|SUIS_HUMAN Sucrase-isomaltase, intestinal OS=Homo sapiens GN=SI PE=1 SV=6	16726	Caco2P7_diffgpep1.20375.20375.4	controllerType=0 controllerNumber=1 scan=20375	96.6653
24136:4	1	R.VAENNQPMNAHSN[+1913.677]FTYDASNQVLLIADLK.L	HexNAc(4)Hex(5)Fuc(0)NeuAc(1)	N[+1914]	1283.57	4	5131.24	5131.24	0	0.7	892	Specific	629.76	487.66	51.35	11.7	175	>sp|P14410|SUIS_HUMAN Sucrase-isomaltase, intestinal OS=Homo sapiens GN=SI PE=1 SV=6	16726	Caco2P7_diffgpep1.22077.22077.4	controllerType=0 controllerNumber=1 scan=22077	104.35
24158:4	1	R.VAENNQPMNAHSN[+2116.756]FTYDASNQVLLIADLK.L	HexNAc(5)Hex(5)Fuc(0)NeuAc(1)	N[+2117]	1334.34	4	5334.34	5334.31	0	4.1	892	Specific	634.04	454.75	28.05	11.65	175	>sp|P14410|SUIS_HUMAN Sucrase-isomaltase, intestinal OS=Homo sapiens GN=SI PE=1 SV=6	16726	Caco2P7_diffgpep1.22099.22099.4	controllerType=0 controllerNumber=1 scan=22099	104.465
22254:4	1	R.VAENNQPMNAHSN[+1825.661]FTYDASNQVLLIADLK.L	HexNAc(5)Hex(5)Fuc(0)NeuAc(0)	N[+1826]	1261.56	4	5043.23	5043.22	0	2.2	892	Specific	728.07	520.77	520.77	13.82	175	>sp|P14410|SUIS_HUMAN Sucrase-isomaltase, intestinal OS=Homo sapiens GN=SI PE=1 SV=6	16726	Caco2P7_diffgpep1.20400.20400.4	controllerType=0 controllerNumber=1 scan=20400	96.7775
22259:4	1	R.N[+2481.889]FSVQWNQIFSENER.F	HexNAc(6)Hex(6)Fuc(0)NeuAc(1)	N[+2482]	1095.95	4	4380.79	4379.77	1	3.8	926	Specific	163.15	81.16	10.79	2.01	175	>sp|P14410|SUIS_HUMAN Sucrase-isomaltase, intestinal OS=Homo sapiens GN=SI PE=1 SV=6	16726	Caco2P7_diffgpep1.20403.20403.4	controllerType=0 controllerNumber=1 scan=20403	96.794
24996:4	1	R.N[+2116.756]FSVQWNQIFSENER.F	HexNAc(5)Hex(5)Fuc(0)NeuAc(1)	N[+2117]	1004.42	4	4014.64	4014.64	0	1.4	926	Specific	225.4	79.51	29.37	3.96	175	>sp|P14410|SUIS_HUMAN Sucrase-isomaltase, intestinal OS=Homo sapiens GN=SI PE=1 SV=6	16726	Caco2P7_diffgpep1.23018.23018.4	controllerType=0 controllerNumber=1 scan=23018	108.385
22569:3	1	R.N[+1825.661]FSVQWNQIFSENER.F	HexNAc(5)Hex(5)Fuc(0)NeuAc(0)	N[+1826]	1241.85	3	3723.54	3723.54	0	0.3	926	Specific	242.36	105.3	105.3	3.99	175	>sp|P14410|SUIS_HUMAN Sucrase-isomaltase, intestinal OS=Homo sapiens GN=SI PE=1 SV=6	16726	Caco2P7_diffgpep1.20658.20658.3	controllerType=0 controllerNumber=1 scan=20658	97.9609
24998:3	1	R.N[+2116.756]FSVQWNQIFSENER.F	HexNAc(5)Hex(5)Fuc(0)NeuAc(1)	N[+2117]	1338.55	3	4013.64	4014.64	-1	0.2	926	Specific	247.81	90.33	90.33	4.47	175	>sp|P14410|SUIS_HUMAN Sucrase-isomaltase, intestinal OS=Homo sapiens GN=SI PE=1 SV=6	16726	Caco2P7_diffgpep1.23021.23021.3	controllerType=0 controllerNumber=1 scan=23021	108.397
25023:3	1	R.N[+2116.756]FSVQWNQIFSENER.F	HexNAc(5)Hex(5)Fuc(0)NeuAc(1)	N[+2117]	1338.89	3	4014.64	4014.64	0	1.5	926	Specific	275.75	132.68	37.07	4.64	175	>sp|P14410|SUIS_HUMAN Sucrase-isomaltase, intestinal OS=Homo sapiens GN=SI PE=1 SV=6	16726	Caco2P7_diffgpep1.23056.23056.3	controllerType=0 controllerNumber=1 scan=23056	108.54
21977:4	1	R.N[+2700.988]FSVQWNQIFSENER.F	HexNAc(5)Hex(5)Fuc(4)NeuAc(1)	N[+2701]	1150.73	4	4599.88	4598.87	1	2	926	Specific	288.02	143.49	21.67	5.36	175	>sp|P14410|SUIS_HUMAN Sucrase-isomaltase, intestinal OS=Homo sapiens GN=SI PE=1 SV=6	16726	Caco2P7_diffgpep1.20142.20142.4	controllerType=0 controllerNumber=1 scan=20142	95.6708
22540:3	1	R.N[+1864.634]FSVQWNQIFSENER.F	HexNAc(2)Hex(9)Fuc(0)NeuAc(0)	N[+1865]	1254.85	3	3762.52	3762.52	0	1.3	926	Specific	402.49	202.76	202.76	6.27	175	>sp|P14410|SUIS_HUMAN Sucrase-isomaltase, intestinal OS=Homo sapiens GN=SI PE=1 SV=6	16726	Caco2P7_diffgpep1.20635.20635.3	controllerType=0 controllerNumber=1 scan=20635	97.8603
22474:3	1	R.N[+1864.634]FSVQWNQIFSENER.F	HexNAc(2)Hex(9)Fuc(0)NeuAc(0)	N[+1865]	1254.85	3	3762.53	3762.52	0	3.2	926	Specific	430.5	293.66	293.66	6.42	175	>sp|P14410|SUIS_HUMAN Sucrase-isomaltase, intestinal OS=Homo sapiens GN=SI PE=1 SV=6	16726	Caco2P7_diffgpep1.20566.20566.3	controllerType=0 controllerNumber=1 scan=20566	97.5658
22498:3	1	R.N[+1864.634]FSVQWNQIFSENER.F	HexNAc(2)Hex(9)Fuc(0)NeuAc(0)	N[+1865]	1254.85	3	3762.54	3762.52	0	6.2	926	Specific	519.95	386.35	386.35	8.15	175	>sp|P14410|SUIS_HUMAN Sucrase-isomaltase, intestinal OS=Homo sapiens GN=SI PE=1 SV=6	16726	Caco2P7_diffgpep1.20590.20590.3	controllerType=0 controllerNumber=1 scan=20590	97.6717
07234:3	1	R.YGYAN[+2627.947]TSEVR.E	HexNAc(6)Hex(6)Fuc(1)NeuAc(1)	N[+2628]	1263.17	3	3787.49	3787.48	0	1.9	1231	Specific	217.49	88.3	88.3	2.05	175	>sp|P14410|SUIS_HUMAN Sucrase-isomaltase, intestinal OS=Homo sapiens GN=SI PE=1 SV=6	16726	Caco2P7_diffgpep1.7880.7880.3	controllerType=0 controllerNumber=1 scan=7880	36.6133
09275:3	1	R.YGYAN[+2553.910]TSEVR.E	HexNAc(5)Hex(5)Fuc(1)NeuAc(2)	N[+2554]	1238.49	3	3713.45	3713.45	0	1	1231	Specific	239.1	71.34	71.34	3.81	175	>sp|P14410|SUIS_HUMAN Sucrase-isomaltase, intestinal OS=Homo sapiens GN=SI PE=1 SV=6	16726	Caco2P7_diffgpep1.9658.9658.3	controllerType=0 controllerNumber=1 scan=9658	45.2195
07370:3	1	R.YGYAN[+2262.814]TSEVR.E	HexNAc(5)Hex(5)Fuc(1)NeuAc(1)	N[+2263]	1141.46	3	3422.36	3422.35	0	1.4	1231	Specific	339.12	130.01	130.01	5.35	175	>sp|P14410|SUIS_HUMAN Sucrase-isomaltase, intestinal OS=Homo sapiens GN=SI PE=1 SV=6	16726	Caco2P7_diffgpep1.7990.7990.3	controllerType=0 controllerNumber=1 scan=7990	37.1586
07392:3	1	R.YGYAN[+2627.947]TSEVR.E	HexNAc(6)Hex(6)Fuc(1)NeuAc(1)	N[+2628]	1263.17	3	3787.49	3787.48	0	2.6	1231	Specific	400.68	156.87	156.87	5.73	175	>sp|P14410|SUIS_HUMAN Sucrase-isomaltase, intestinal OS=Homo sapiens GN=SI PE=1 SV=6	16726	Caco2P7_diffgpep1.8008.8008.3	controllerType=0 controllerNumber=1 scan=8008	37.248
18665:3	1	R.YIIILDPAISGN[+1930.692]ETK.T	HexNAc(4)Hex(6)Fuc(1)NeuAc(0)	N[+1931]	1193.21	3	3577.6	3577.59	0	2.4	1292	Specific	247.38	172.6	172.6	5.19	175	>sp|P14410|SUIS_HUMAN Sucrase-isomaltase, intestinal OS=Homo sapiens GN=SI PE=1 SV=6	16726	Caco2P7_diffgpep1.17383.17383.3	controllerType=0 controllerNumber=1 scan=17383	82.77
18284:3	1	R.YIIILDPAISGN[+2498.904]ETK.T	HexNAc(6)Hex(7)Fuc(1)NeuAc(0)	N[+2499]	1382.62	3	4145.84	4145.8	0	8.2	1292	Specific	285.45	169.16	169.16	4.91	175	>sp|P14410|SUIS_HUMAN Sucrase-isomaltase, intestinal OS=Homo sapiens GN=SI PE=1 SV=6	16726	Caco2P7_diffgpep1.17077.17077.3	controllerType=0 controllerNumber=1 scan=17077	81.2886
18297:3	1	R.YIIILDPAISGN[+2149.767]ETK.T	HexNAc(5)Hex(7)Fuc(0)NeuAc(0)	N[+2150]	1266.23	3	3796.67	3796.67	0	1.9	1292	Specific	288.92	161.23	161.23	5.62	175	>sp|P14410|SUIS_HUMAN Sucrase-isomaltase, intestinal OS=Homo sapiens GN=SI PE=1 SV=6	16726	Caco2P7_diffgpep1.17088.17088.3	controllerType=0 controllerNumber=1 scan=17088	81.3443
18787:3	1	R.YIIILDPAISGN[+1540.529]ETK.T	HexNAc(2)Hex(7)Fuc(0)NeuAc(0)	N[+1541]	1063.15	3	3187.42	3187.43	0	-1.3	1292	Specific	291.8	175.57	175.57	4.95	175	>sp|P14410|SUIS_HUMAN Sucrase-isomaltase, intestinal OS=Homo sapiens GN=SI PE=1 SV=6	16726	Caco2P7_diffgpep1.17468.17468.3	controllerType=0 controllerNumber=1 scan=17468	83.1853
18710:3	1	R.YIIILDPAISGN[+1930.692]ETK.T	HexNAc(4)Hex(6)Fuc(1)NeuAc(0)	N[+1931]	1193.21	3	3577.61	3577.59	0	5.8	1292	Specific	313.77	136.19	136.19	4.82	175	>sp|P14410|SUIS_HUMAN Sucrase-isomaltase, intestinal OS=Homo sapiens GN=SI PE=1 SV=6	16726	Caco2P7_diffgpep1.17413.17413.3	controllerType=0 controllerNumber=1 scan=17413	82.9139
18870:3	1	R.YIIILDPAISGN[+1419.502]ETK.T	HexNAc(3)Hex(5)Fuc(0)NeuAc(0)	N[+1420]	1022.81	3	3066.4	3066.4	0	0.5	1292	Specific	329.21	184.12	184.12	5.88	175	>sp|P14410|SUIS_HUMAN Sucrase-isomaltase, intestinal OS=Homo sapiens GN=SI PE=1 SV=6	16726	Caco2P7_diffgpep1.17537.17537.3	controllerType=0 controllerNumber=1 scan=17537	83.5129
18712:3	1	R.YIIILDPAISGN[+1622.582]ETK.T	HexNAc(4)Hex(5)Fuc(0)NeuAc(0)	N[+1623]	1090.51	3	3269.5	3269.48	0	6.7	1292	Specific	342.48	175.16	175.16	5.14	175	>sp|P14410|SUIS_HUMAN Sucrase-isomaltase, intestinal OS=Homo sapiens GN=SI PE=1 SV=6	16726	Caco2P7_diffgpep1.17414.17414.3	controllerType=0 controllerNumber=1 scan=17414	82.9193
21495:3	1	R.YIIILDPAISGN[+2059.735]ETK.T	HexNAc(4)Hex(5)Fuc(1)NeuAc(1)	N[+2060]	1236.22	3	3706.63	3706.63	0	-0.1	1292	Specific	358.14	199.7	199.7	5.6	175	>sp|P14410|SUIS_HUMAN Sucrase-isomaltase, intestinal OS=Homo sapiens GN=SI PE=1 SV=6	16726	Caco2P7_diffgpep1.19738.19738.3	controllerType=0 controllerNumber=1 scan=19738	93.7915
18685:3	1	R.YIIILDPAISGN[+1987.714]ETK.T	HexNAc(5)Hex(6)Fuc(0)NeuAc(0)	N[+1988]	1212.21	3	3634.62	3634.61	0	2.4	1292	Specific	363.56	214.59	214.59	5.97	175	>sp|P14410|SUIS_HUMAN Sucrase-isomaltase, intestinal OS=Homo sapiens GN=SI PE=1 SV=6	16726	Caco2P7_diffgpep1.17396.17396.3	controllerType=0 controllerNumber=1 scan=17396	82.8332
18652:4	1	R.YIIILDPAISGN[+2848.041]ETK.T	HexNAc(7)Hex(7)Fuc(2)NeuAc(0)	N[+2848]	1124.75	4	4495.98	4494.94	1	7	1292	Specific	387.66	113.37	113.37	4.54	175	>sp|P14410|SUIS_HUMAN Sucrase-isomaltase, intestinal OS=Homo sapiens GN=SI PE=1 SV=6	16726	Caco2P7_diffgpep1.17373.17373.3	controllerType=0 controllerNumber=1 scan=17373	82.7237
18634:3	1	R.YIIILDPAISGN[+1768.640]ETK.T	HexNAc(4)Hex(5)Fuc(1)NeuAc(0)	N[+1769]	1139.19	3	3415.56	3415.54	0	5.2	1292	Specific	388.5	216.51	216.51	5.64	175	>sp|P14410|SUIS_HUMAN Sucrase-isomaltase, intestinal OS=Homo sapiens GN=SI PE=1 SV=6	16726	Caco2P7_diffgpep1.17357.17357.3	controllerType=0 controllerNumber=1 scan=17357	82.6485
18658:3	1	R.YIIILDPAISGN[+1581.555]ETK.T	HexNAc(3)Hex(6)Fuc(0)NeuAc(0)	N[+1582]	1076.82	3	3228.45	3228.45	0	-1.4	1292	Specific	399.13	229.6	229.6	5.51	175	>sp|P14410|SUIS_HUMAN Sucrase-isomaltase, intestinal OS=Homo sapiens GN=SI PE=1 SV=6	16726	Caco2P7_diffgpep1.17377.17377.3	controllerType=0 controllerNumber=1 scan=17377	82.7454
21245:3	1	R.YIIILDPAISGN[+2237.783]ETK.T	HexNAc(4)Hex(7)Fuc(0)NeuAc(1)	N[+2238]	1295.56	3	3884.66	3884.68	0	-4.8	1292	Specific	410.75	207.07	207.07	5.18	175	>sp|P14410|SUIS_HUMAN Sucrase-isomaltase, intestinal OS=Homo sapiens GN=SI PE=1 SV=6	16726	Caco2P7_diffgpep1.19510.19510.3	controllerType=0 controllerNumber=1 scan=19510	92.7852
21810:3	1	R.YIIILDPAISGN[+1872.651]ETK.T	HexNAc(3)Hex(6)Fuc(0)NeuAc(1)	N[+1873]	1173.86	3	3519.58	3519.55	0	7.7	1292	Specific	411.67	193.89	193.89	5.56	175	>sp|P14410|SUIS_HUMAN Sucrase-isomaltase, intestinal OS=Homo sapiens GN=SI PE=1 SV=6	16726	Caco2P7_diffgpep1.20001.20001.3	controllerType=0 controllerNumber=1 scan=20001	95.0059
18668:3	1	R.YIIILDPAISGN[+1768.640]ETK.T	HexNAc(4)Hex(5)Fuc(1)NeuAc(0)	N[+1769]	1139.19	3	3415.54	3415.54	0	0.8	1292	Specific	415.39	236.57	236.57	6.24	175	>sp|P14410|SUIS_HUMAN Sucrase-isomaltase, intestinal OS=Homo sapiens GN=SI PE=1 SV=6	16726	Caco2P7_diffgpep1.17385.17385.3	controllerType=0 controllerNumber=1 scan=17385	82.7811
18651:3	1	R.YIIILDPAISGN[+1727.613]ETK.T	HexNAc(3)Hex(6)Fuc(1)NeuAc(0)	N[+1728]	1125.51	3	3374.52	3374.51	0	2.3	1292	Specific	419.43	266.86	266.86	6.29	175	>sp|P14410|SUIS_HUMAN Sucrase-isomaltase, intestinal OS=Homo sapiens GN=SI PE=1 SV=6	16726	Caco2P7_diffgpep1.17373.17373.3	controllerType=0 controllerNumber=1 scan=17373	82.7237
18677:3	1	R.YIIILDPAISGN[+1540.529]ETK.T	HexNAc(2)Hex(7)Fuc(0)NeuAc(0)	N[+1541]	1063.15	3	3187.45	3187.43	0	5.3	1292	Specific	423.01	297.26	297.26	6	175	>sp|P14410|SUIS_HUMAN Sucrase-isomaltase, intestinal OS=Homo sapiens GN=SI PE=1 SV=6	16726	Caco2P7_diffgpep1.17391.17391.3	controllerType=0 controllerNumber=1 scan=17391	82.8099
18334:3	1	R.YIIILDPAISGN[+2238.803]ETK.T	HexNAc(4)Hex(7)Fuc(2)NeuAc(0)	N[+2239]	1295.92	3	3885.73	3885.7	0	7.3	1292	Specific	429.88	314.11	314.11	5.97	175	>sp|P14410|SUIS_HUMAN Sucrase-isomaltase, intestinal OS=Homo sapiens GN=SI PE=1 SV=6	16726	Caco2P7_diffgpep1.17117.17117.3	controllerType=0 controllerNumber=1 scan=17117	81.4862
21416:3	1	R.YIIILDPAISGN[+2237.783]ETK.T	HexNAc(4)Hex(7)Fuc(0)NeuAc(1)	N[+2238]	1295.57	3	3884.71	3884.68	0	6	1292	Specific	452.69	355.82	355.82	6.41	175	>sp|P14410|SUIS_HUMAN Sucrase-isomaltase, intestinal OS=Homo sapiens GN=SI PE=1 SV=6	16726	Caco2P7_diffgpep1.19672.19672.3	controllerType=0 controllerNumber=1 scan=19672	93.4925
21685:3	1	R.YIIILDPAISGN[+1872.651]ETK.T	HexNAc(3)Hex(6)Fuc(0)NeuAc(1)	N[+1873]	1173.86	3	3519.56	3519.55	0	2.5	1292	Specific	454.74	332.05	332.05	6.73	175	>sp|P14410|SUIS_HUMAN Sucrase-isomaltase, intestinal OS=Homo sapiens GN=SI PE=1 SV=6	16726	Caco2P7_diffgpep1.19900.19900.3	controllerType=0 controllerNumber=1 scan=19900	94.541
18579:3	1	R.YIIILDPAISGN[+2133.772]ETK.T	HexNAc(5)Hex(6)Fuc(1)NeuAc(0)	N[+2134]	1260.9	3	3780.69	3780.67	0	5.8	1292	Specific	455.53	327.2	327.2	6.28	175	>sp|P14410|SUIS_HUMAN Sucrase-isomaltase, intestinal OS=Homo sapiens GN=SI PE=1 SV=6	16726	Caco2P7_diffgpep1.17313.17313.3	controllerType=0 controllerNumber=1 scan=17313	82.4402
18691:3	1	R.YIIILDPAISGN[+1784.634]ETK.T	HexNAc(4)Hex(6)Fuc(0)NeuAc(0)	N[+1785]	1144.52	3	3431.55	3431.53	0	5.6	1292	Specific	474.1	295.41	295.41	6.08	175	>sp|P14410|SUIS_HUMAN Sucrase-isomaltase, intestinal OS=Homo sapiens GN=SI PE=1 SV=6	16726	Caco2P7_diffgpep1.17401.17401.3	controllerType=0 controllerNumber=1 scan=17401	82.8565
21340:3	1	R.YIIILDPAISGN[+2221.788]ETK.T	HexNAc(4)Hex(6)Fuc(1)NeuAc(1)	N[+2222]	1290.24	3	3868.71	3868.69	0	5.3	1292	Specific	499.06	284.53	284.53	6.17	175	>sp|P14410|SUIS_HUMAN Sucrase-isomaltase, intestinal OS=Homo sapiens GN=SI PE=1 SV=6	16726	Caco2P7_diffgpep1.19610.19610.3	controllerType=0 controllerNumber=1 scan=19610	93.2114
21514:3	1	R.YIIILDPAISGN[+2075.730]ETK.T	HexNAc(4)Hex(6)Fuc(0)NeuAc(1)	N[+2076]	1241.56	3	3722.65	3722.63	0	6.3	1292	Specific	500.42	275.8	275.8	6.12	175	>sp|P14410|SUIS_HUMAN Sucrase-isomaltase, intestinal OS=Homo sapiens GN=SI PE=1 SV=6	16726	Caco2P7_diffgpep1.19753.19753.3	controllerType=0 controllerNumber=1 scan=19753	93.8647
21232:3	1	R.YIIILDPAISGN[+2383.841]ETK.T	HexNAc(4)Hex(7)Fuc(1)NeuAc(1)	N[+2384]	1344.26	3	4030.75	4030.74	0	3.1	1292	Specific	501.86	349.19	349.19	7.02	175	>sp|P14410|SUIS_HUMAN Sucrase-isomaltase, intestinal OS=Homo sapiens GN=SI PE=1 SV=6	16726	Caco2P7_diffgpep1.19500.19500.3	controllerType=0 controllerNumber=1 scan=19500	92.7379
21606:3	1	R.YIIILDPAISGN[+2075.730]ETK.T	HexNAc(4)Hex(6)Fuc(0)NeuAc(1)	N[+2076]	1241.55	3	3722.64	3722.63	0	3.9	1292	Specific	503.23	351.2	351.2	6.99	175	>sp|P14410|SUIS_HUMAN Sucrase-isomaltase, intestinal OS=Homo sapiens GN=SI PE=1 SV=6	16726	Caco2P7_diffgpep1.19826.19826.3	controllerType=0 controllerNumber=1 scan=19826	94.2062
21280:3	1	R.YIIILDPAISGN[+2383.841]ETK.T	HexNAc(4)Hex(7)Fuc(1)NeuAc(1)	N[+2384]	1344.25	3	4030.74	4030.74	0	0.1	1292	Specific	503.23	355.51	355.51	6.78	175	>sp|P14410|SUIS_HUMAN Sucrase-isomaltase, intestinal OS=Homo sapiens GN=SI PE=1 SV=6	16726	Caco2P7_diffgpep1.19538.19538.3	controllerType=0 controllerNumber=1 scan=19538	92.9159
21603:3	1	R.YIIILDPAISGN[+1913.677]ETK.T	HexNAc(4)Hex(5)Fuc(0)NeuAc(1)	N[+1914]	1187.54	3	3560.59	3560.58	0	4.1	1292	Specific	503.24	257.42	257.42	6.5	175	>sp|P14410|SUIS_HUMAN Sucrase-isomaltase, intestinal OS=Homo sapiens GN=SI PE=1 SV=6	16726	Caco2P7_diffgpep1.19823.19823.3	controllerType=0 controllerNumber=1 scan=19823	94.1937
21390:3	1	R.YIIILDPAISGN[+2075.730]ETK.T	HexNAc(4)Hex(6)Fuc(0)NeuAc(1)	N[+2076]	1241.54	3	3722.62	3722.63	0	-3.2	1292	Specific	514.99	277.51	277.51	5.92	175	>sp|P14410|SUIS_HUMAN Sucrase-isomaltase, intestinal OS=Homo sapiens GN=SI PE=1 SV=6	16726	Caco2P7_diffgpep1.19651.19651.3	controllerType=0 controllerNumber=1 scan=19651	93.3979
18404:3	1	R.YIIILDPAISGN[+1946.687]ETK.T	HexNAc(4)Hex(7)Fuc(0)NeuAc(0)	N[+1947]	1198.53	3	3593.58	3593.59	0	-3.2	1292	Specific	518.35	374.26	374.26	6.56	175	>sp|P14410|SUIS_HUMAN Sucrase-isomaltase, intestinal OS=Homo sapiens GN=SI PE=1 SV=6	16726	Caco2P7_diffgpep1.17175.17175.3	controllerType=0 controllerNumber=1 scan=17175	81.7658
21535:3	1	R.YIIILDPAISGN[+2221.788]ETK.T	HexNAc(4)Hex(6)Fuc(1)NeuAc(1)	N[+2222]	1290.24	3	3868.7	3868.69	0	2.8	1292	Specific	528.3	413.4	413.4	8.72	175	>sp|P14410|SUIS_HUMAN Sucrase-isomaltase, intestinal OS=Homo sapiens GN=SI PE=1 SV=6	16726	Caco2P7_diffgpep1.19769.19769.3	controllerType=0 controllerNumber=1 scan=19769	93.9437
18523:3	1	R.YIIILDPAISGN[+1784.634]ETK.T	HexNAc(4)Hex(6)Fuc(0)NeuAc(0)	N[+1785]	1144.52	3	3431.54	3431.53	0	3	1292	Specific	528.56	363.76	363.76	7.33	175	>sp|P14410|SUIS_HUMAN Sucrase-isomaltase, intestinal OS=Homo sapiens GN=SI PE=1 SV=6	16726	Caco2P7_diffgpep1.17270.17270.3	controllerType=0 controllerNumber=1 scan=17270	82.2343
18794:3	1	R.YIIILDPAISGN[+1378.476]ETK.T	HexNAc(2)Hex(6)Fuc(0)NeuAc(0)	N[+1378]	1009.13	3	3025.38	3025.38	0	2.8	1292	Specific	543.59	348.07	348.07	7.29	175	>sp|P14410|SUIS_HUMAN Sucrase-isomaltase, intestinal OS=Homo sapiens GN=SI PE=1 SV=6	16726	Caco2P7_diffgpep1.17474.17474.3	controllerType=0 controllerNumber=1 scan=17474	83.214
18406:3	1	R.YIIILDPAISGN[+2092.745]ETK.T	HexNAc(4)Hex(7)Fuc(1)NeuAc(0)	N[+2093]	1247.23	3	3739.66	3739.65	0	5.1	1292	Specific	550.35	473.13	473.13	8.55	175	>sp|P14410|SUIS_HUMAN Sucrase-isomaltase, intestinal OS=Homo sapiens GN=SI PE=1 SV=6	16726	Caco2P7_diffgpep1.17177.17177.3	controllerType=0 controllerNumber=1 scan=17177	81.7723
21363:3	1	R.YIIILDPAISGN[+2221.788]ETK.T	HexNAc(4)Hex(6)Fuc(1)NeuAc(1)	N[+2222]	1290.24	3	3868.7	3868.69	0	3.1	1292	Specific	551.55	461.15	461.15	8.88	175	>sp|P14410|SUIS_HUMAN Sucrase-isomaltase, intestinal OS=Homo sapiens GN=SI PE=1 SV=6	16726	Caco2P7_diffgpep1.19629.19629.3	controllerType=0 controllerNumber=1 scan=19629	93.298
18607:3	1	R.YIIILDPAISGN[+1987.714]ETK.T	HexNAc(5)Hex(6)Fuc(0)NeuAc(0)	N[+1988]	1212.21	3	3634.62	3634.61	0	2.3	1292	Specific	559.08	470.84	470.84	8.88	175	>sp|P14410|SUIS_HUMAN Sucrase-isomaltase, intestinal OS=Homo sapiens GN=SI PE=1 SV=6	16726	Caco2P7_diffgpep1.17337.17337.3	controllerType=0 controllerNumber=1 scan=17337	82.555
18467:3	1	R.YIIILDPAISGN[+2076.750]ETK.T	HexNAc(4)Hex(6)Fuc(2)NeuAc(0)	N[+2077]	1241.89	3	3723.66	3723.65	0	3.7	1292	Specific	571.6	374.64	374.64	7.6	175	>sp|P14410|SUIS_HUMAN Sucrase-isomaltase, intestinal OS=Homo sapiens GN=SI PE=1 SV=6	16726	Caco2P7_diffgpep1.17229.17229.3	controllerType=0 controllerNumber=1 scan=17229	82.0312
21718:3	1	R.YIIILDPAISGN[+1710.598]ETK.T	HexNAc(3)Hex(5)Fuc(0)NeuAc(1)	N[+1711]	1119.84	3	3357.49	3357.5	0	-1.2	1292	Specific	611.16	393.97	393.97	10.76	175	>sp|P14410|SUIS_HUMAN Sucrase-isomaltase, intestinal OS=Homo sapiens GN=SI PE=1 SV=6	16726	Caco2P7_diffgpep1.19929.19929.3	controllerType=0 controllerNumber=1 scan=19929	94.6662
18532:3	1	R.YIIILDPAISGN[+1930.692]ETK.T	HexNAc(4)Hex(6)Fuc(1)NeuAc(0)	N[+1931]	1193.21	3	3577.6	3577.59	0	3	1292	Specific	639.28	460.84	460.84	11.3	175	>sp|P14410|SUIS_HUMAN Sucrase-isomaltase, intestinal OS=Homo sapiens GN=SI PE=1 SV=6	16726	Caco2P7_diffgpep1.17277.17277.3	controllerType=0 controllerNumber=1 scan=17277	82.2681
18457:3	1	R.YIIILDPAISGN[+1864.634]ETK.T	HexNAc(2)Hex(9)Fuc(0)NeuAc(0)	N[+1865]	1171.18	3	3511.54	3511.53	0	1.8	1292	Specific	666.9	483.59	483.59	12.43	175	>sp|P14410|SUIS_HUMAN Sucrase-isomaltase, intestinal OS=Homo sapiens GN=SI PE=1 SV=6	16726	Caco2P7_diffgpep1.17221.17221.3	controllerType=0 controllerNumber=1 scan=17221	81.9917
21530:3	1	R.YIIILDPAISGN[+1872.651]ETK.T	HexNAc(3)Hex(6)Fuc(0)NeuAc(1)	N[+1873]	1173.86	3	3519.57	3519.55	0	4.3	1292	Specific	685.61	476.82	476.82	11.97	175	>sp|P14410|SUIS_HUMAN Sucrase-isomaltase, intestinal OS=Homo sapiens GN=SI PE=1 SV=6	16726	Caco2P7_diffgpep1.19766.19766.3	controllerType=0 controllerNumber=1 scan=19766	93.9271
20270:3	1	K.VWPDLPN[+3066.120]ITIDK.T	HexNAc(6)Hex(6)Fuc(4)NeuAc(1)	N[+3066]	1493.3	3	4477.9	4476.88	1	2	1334	Specific	173.25	154.94	154.94	2.85	175	>sp|P14410|SUIS_HUMAN Sucrase-isomaltase, intestinal OS=Homo sapiens GN=SI PE=1 SV=6	16726	Caco2P7_diffgpep1.18680.18680.3	controllerType=0 controllerNumber=1 scan=18680	88.8907
21229:3	1	K.VWPDLPN[+1864.634]ITIDK.T	HexNAc(2)Hex(9)Fuc(0)NeuAc(0)	N[+1865]	1092.47	3	3275.4	3275.4	0	-0.2	1334	Specific	238.84	188.53	188.53	4.95	175	>sp|P14410|SUIS_HUMAN Sucrase-isomaltase, intestinal OS=Homo sapiens GN=SI PE=1 SV=6	16726	Caco2P7_diffgpep1.19497.19497.3	controllerType=0 controllerNumber=1 scan=19497	92.7252
23920:3	1	K.VWPDLPN[+2262.814]ITIDK.T	HexNAc(5)Hex(5)Fuc(1)NeuAc(1)	N[+2263]	1225.2	3	3673.57	3673.58	0	-1.5	1334	Specific	241.18	125.22	125.22	4.37	175	>sp|P14410|SUIS_HUMAN Sucrase-isomaltase, intestinal OS=Homo sapiens GN=SI PE=1 SV=6	16726	Caco2P7_diffgpep1.21827.21827.3	controllerType=0 controllerNumber=1 scan=21827	103.293
20678:3	1	K.VWPDLPN[+2700.988]ITIDK.T	HexNAc(5)Hex(5)Fuc(4)NeuAc(1)	N[+2701]	1371.59	3	4112.75	4111.75	1	0.1	1334	Specific	312.81	247.88	35.56	5.62	175	>sp|P14410|SUIS_HUMAN Sucrase-isomaltase, intestinal OS=Homo sapiens GN=SI PE=1 SV=6	16726	Caco2P7_diffgpep1.19006.19006.3	controllerType=0 controllerNumber=1 scan=19006	90.4949
05496:3	1	K.TLTEDEAVN[+1864.634]ASR.A	HexNAc(2)Hex(9)Fuc(0)NeuAc(0)	N[+1865]	1057.43	3	3170.27	3170.26	0	1.5	1346	Specific	290.15	93.17	93.17	4.88	175	>sp|P14410|SUIS_HUMAN Sucrase-isomaltase, intestinal OS=Homo sapiens GN=SI PE=1 SV=6	16726	Caco2P7_diffgpep1.6292.6292.3	controllerType=0 controllerNumber=1 scan=6292	29.111
19155:4	1	K.FDGLWIDMNEPSSFVN[+2018.708]GTTTNQC[+57.021]R.N	HexNAc(3)Hex(6)Fuc(1)NeuAc(1)	C[+57], N[+2019]	1202.75	4	4807.97	4807.94	0	7.5	1388	Specific	250.14	135.51	135.51	2.87	175	>sp|P14410|SUIS_HUMAN Sucrase-isomaltase, intestinal OS=Homo sapiens GN=SI PE=1 SV=6	16726	Caco2P7_diffgpep1.17757.17757.4	controllerType=0 controllerNumber=1 scan=17757	84.5836
19123:4	1	K.FDGLWIDMNEPSSFVN[+2018.708]GTTTNQC[+57.021]R.N	HexNAc(3)Hex(6)Fuc(1)NeuAc(1)	C[+57], N[+2019]	1202.74	4	4807.95	4807.94	0	1.6	1388	Specific	258.52	171.35	171.35	4.93	175	>sp|P14410|SUIS_HUMAN Sucrase-isomaltase, intestinal OS=Homo sapiens GN=SI PE=1 SV=6	16726	Caco2P7_diffgpep1.17730.17730.4	controllerType=0 controllerNumber=1 scan=17730	84.4532
19145:4	1	K.FDGLWIDMNEPSSFVN[+2018.708]GTTTNQC[+57.021]R.N	HexNAc(3)Hex(6)Fuc(1)NeuAc(1)	C[+57], N[+2019]	1202.75	4	4807.98	4807.94	0	9.1	1388	Specific	280.41	152.85	152.85	4.22	175	>sp|P14410|SUIS_HUMAN Sucrase-isomaltase, intestinal OS=Homo sapiens GN=SI PE=1 SV=6	16726	Caco2P7_diffgpep1.17750.17750.4	controllerType=0 controllerNumber=1 scan=17750	84.5494
24405:4	1	K.FDGLWIDMNEPSSFVN[+1540.529]GTTTNQC[+57.021]R.N	HexNAc(2)Hex(7)Fuc(0)NeuAc(0)	C[+57], N[+1541]	1083.45	4	4330.77	4329.76	1	2.3	1388	Specific	291.09	193.15	193.15	6.02	175	>sp|P14410|SUIS_HUMAN Sucrase-isomaltase, intestinal OS=Homo sapiens GN=SI PE=1 SV=6	16726	Caco2P7_diffgpep1.22386.22386.4	controllerType=0 controllerNumber=1 scan=22386	105.664
19246:4	1	K.FDGLWIDMNEPSSFVN[+1856.656]GTTTNQC[+57.021]R.N	HexNAc(3)Hex(5)Fuc(1)NeuAc(1)	C[+57], N[+1857]	1162.24	4	4645.93	4645.88	0	8.8	1388	Specific	303.54	205.4	205.4	4.76	175	>sp|P14410|SUIS_HUMAN Sucrase-isomaltase, intestinal OS=Homo sapiens GN=SI PE=1 SV=6	16726	Caco2P7_diffgpep1.17829.17829.4	controllerType=0 controllerNumber=1 scan=17829	84.9392
19174:4	1	K.FDGLWIDMNEPSSFVN[+1856.656]GTTTNQC[+57.021]R.N	HexNAc(3)Hex(5)Fuc(1)NeuAc(1)	C[+57], N[+1857]	1162.24	4	4645.92	4645.88	0	7.6	1388	Specific	307.96	183.61	183.61	5.54	175	>sp|P14410|SUIS_HUMAN Sucrase-isomaltase, intestinal OS=Homo sapiens GN=SI PE=1 SV=6	16726	Caco2P7_diffgpep1.17774.17774.4	controllerType=0 controllerNumber=1 scan=17774	84.668
24272:4	1	K.FDGLWIDMNEPSSFVN[+1864.634]GTTTNQC[+57.021]R.N	HexNAc(2)Hex(9)Fuc(0)NeuAc(0)	C[+57], N[+1865]	1164.22	4	4653.85	4653.86	0	-2.9	1388	Specific	507.9	387.3	387.3	8.36	175	>sp|P14410|SUIS_HUMAN Sucrase-isomaltase, intestinal OS=Homo sapiens GN=SI PE=1 SV=6	16726	Caco2P7_diffgpep1.22232.22232.4	controllerType=0 controllerNumber=1 scan=22232	105.033
24274:4	1	K.FDGLWIDMNEPSSFVN[+1864.634]GTTTNQC[+57.021]R.N	HexNAc(2)Hex(9)Fuc(0)NeuAc(0)	C[+57], N[+1865]	1164.23	4	4653.88	4653.86	0	3.3	1388	Specific	520.92	428.16	428.16	9.04	175	>sp|P14410|SUIS_HUMAN Sucrase-isomaltase, intestinal OS=Homo sapiens GN=SI PE=1 SV=6	16726	Caco2P7_diffgpep1.22235.22235.4	controllerType=0 controllerNumber=1 scan=22235	105.046
24250:3	1	K.FDGLWIDMNEPSSFVN[+1702.581]GTTTNQC[+57.021]R.N	HexNAc(2)Hex(8)Fuc(0)NeuAc(0)	C[+57], N[+1703]	1497.95	3	4491.84	4491.81	0	7.1	1388	Specific	557.86	405.57	405.57	8.92	175	>sp|P14410|SUIS_HUMAN Sucrase-isomaltase, intestinal OS=Homo sapiens GN=SI PE=1 SV=6	16726	Caco2P7_diffgpep1.22208.22208.3	controllerType=0 controllerNumber=1 scan=22208	104.937
24311:3	1	K.FDGLWIDMNEPSSFVN[+1540.529]GTTTNQC[+57.021]R.N	HexNAc(2)Hex(7)Fuc(0)NeuAc(0)	C[+57], N[+1541]	1443.93	3	4329.77	4329.76	0	4	1388	Specific	617.46	546.65	546.65	11.83	175	>sp|P14410|SUIS_HUMAN Sucrase-isomaltase, intestinal OS=Homo sapiens GN=SI PE=1 SV=6	16726	Caco2P7_diffgpep1.22273.22273.3	controllerType=0 controllerNumber=1 scan=22273	105.201
24259:3	1	K.FDGLWIDMNEPSSFVN[+1702.581]GTTTNQC[+57.021]R.N	HexNAc(2)Hex(8)Fuc(0)NeuAc(0)	C[+57], N[+1703]	1497.95	3	4491.84	4491.81	0	5.8	1388	Specific	664.55	586.76	586.76	12.4	175	>sp|P14410|SUIS_HUMAN Sucrase-isomaltase, intestinal OS=Homo sapiens GN=SI PE=1 SV=6	16726	Caco2P7_diffgpep1.22221.22221.3	controllerType=0 controllerNumber=1 scan=22221	104.986
24440:3	1	K.FDGLWIDMNEPSSFVN[+1540.529]GTTTNQC[+57.021]R.N	HexNAc(2)Hex(7)Fuc(0)NeuAc(0)	C[+57], N[+1541]	1443.92	3	4329.74	4329.76	0	-3.1	1388	Specific	698.11	605.27	605.27	12.21	175	>sp|P14410|SUIS_HUMAN Sucrase-isomaltase, intestinal OS=Homo sapiens GN=SI PE=1 SV=6	16726	Caco2P7_diffgpep1.22421.22421.3	controllerType=0 controllerNumber=1 scan=22421	105.814
24201:3	1	K.FDGLWIDMNEPSSFVN[+1864.634]GTTTNQC[+57.021]R.N	HexNAc(2)Hex(9)Fuc(0)NeuAc(0)	C[+57], N[+1865]	1551.96	3	4653.88	4653.86	0	3.3	1388	Specific	735.67	573.07	573.07	13.83	175	>sp|P14410|SUIS_HUMAN Sucrase-isomaltase, intestinal OS=Homo sapiens GN=SI PE=1 SV=6	16726	Caco2P7_diffgpep1.22161.22161.3	controllerType=0 controllerNumber=1 scan=22161	104.725
24330:3	1	K.FDGLWIDMNEPSSFVN[+1540.529]GTTTNQC[+57.021]R.N	HexNAc(2)Hex(7)Fuc(0)NeuAc(0)	C[+57], N[+1541]	1443.59	3	4328.77	4329.76	-1	2.5	1388	Specific	740.36	645.03	645.03	13.84	175	>sp|P14410|SUIS_HUMAN Sucrase-isomaltase, intestinal OS=Homo sapiens GN=SI PE=1 SV=6	16726	Caco2P7_diffgpep1.22301.22301.3	controllerType=0 controllerNumber=1 scan=22301	105.311
24285:3	1	K.FDGLWIDMNEPSSFVN[+1702.581]GTTTNQC[+57.021]R.N	HexNAc(2)Hex(8)Fuc(0)NeuAc(0)	C[+57], N[+1703]	1497.95	3	4491.83	4491.81	0	3.2	1388	Specific	750.44	601.21	601.21	14.83	175	>sp|P14410|SUIS_HUMAN Sucrase-isomaltase, intestinal OS=Homo sapiens GN=SI PE=1 SV=6	16726	Caco2P7_diffgpep1.22244.22244.3	controllerType=0 controllerNumber=1 scan=22244	105.083
24244:3	1	K.FDGLWIDMNEPSSFVN[+1864.634]GTTTNQC[+57.021]R.N	HexNAc(2)Hex(9)Fuc(0)NeuAc(0)	C[+57], N[+1865]	1551.96	3	4653.86	4653.86	0	0.2	1388	Specific	776.06	611.15	611.15	14.87	175	>sp|P14410|SUIS_HUMAN Sucrase-isomaltase, intestinal OS=Homo sapiens GN=SI PE=1 SV=6	16726	Caco2P7_diffgpep1.22200.22200.3	controllerType=0 controllerNumber=1 scan=22200	104.902
24421:3	1	K.FDGLWIDMNEPSSFVN[+1378.476]GTTTNQC[+57.021]R.N	HexNAc(2)Hex(6)Fuc(0)NeuAc(0)	C[+57], N[+1378]	1389.91	3	4167.72	4167.7	0	3.8	1388	Specific	826.82	642.73	642.73	15.83	175	>sp|P14410|SUIS_HUMAN Sucrase-isomaltase, intestinal OS=Homo sapiens GN=SI PE=1 SV=6	16726	Caco2P7_diffgpep1.22401.22401.3	controllerType=0 controllerNumber=1 scan=22401	105.726
14523:3	1	R.RQDPASWN[+2320.856]ETFAEMSR.N	HexNAc(6)Hex(5)Fuc(2)NeuAc(0)	N[+2321]	1416.24	3	4246.71	4245.72	1	-2.6	1565	Specific	161.81	75.04	75.04	2.03	175	>sp|P14410|SUIS_HUMAN Sucrase-isomaltase, intestinal OS=Homo sapiens GN=SI PE=1 SV=6	16726	Caco2P7_diffgpep1.14101.14101.3	controllerType=0 controllerNumber=1 scan=14101	66.6598
14515:3	1	R.RQDPASWN[+2174.798]ETFAEMSR.N	HexNAc(6)Hex(5)Fuc(1)NeuAc(0)	N[+2175]	1367.22	3	4099.66	4099.66	0	0.4	1565	Specific	192.98	74.82	74.82	2.39	175	>sp|P14410|SUIS_HUMAN Sucrase-isomaltase, intestinal OS=Homo sapiens GN=SI PE=1 SV=6	16726	Caco2P7_diffgpep1.14092.14092.3	controllerType=0 controllerNumber=1 scan=14092	66.6152
14683:3	1	R.RQDPASWN[+1809.666]ETFAEMSR.N	HexNAc(5)Hex(4)Fuc(1)NeuAc(0)	N[+1810]	1245.51	3	3734.52	3734.53	0	-1.5	1565	Specific	228.13	101.47	101.47	4.71	175	>sp|P14410|SUIS_HUMAN Sucrase-isomaltase, intestinal OS=Homo sapiens GN=SI PE=1 SV=6	16726	Caco2P7_diffgpep1.14239.14239.3	controllerType=0 controllerNumber=1 scan=14239	67.3389
14358:3	1	R.RQDPASWN[+2336.851]ETFAEMSR.N	HexNAc(6)Hex(6)Fuc(1)NeuAc(0)	N[+2337]	1421.25	3	4261.73	4261.71	0	4.4	1565	Specific	231.5	104.36	104.36	4.91	175	>sp|P14410|SUIS_HUMAN Sucrase-isomaltase, intestinal OS=Homo sapiens GN=SI PE=1 SV=6	16726	Caco2P7_diffgpep1.13968.13968.3	controllerType=0 controllerNumber=1 scan=13968	66.0135
14530:3	1	R.RQDPASWN[+1971.719]ETFAEMSR.N	HexNAc(5)Hex(5)Fuc(1)NeuAc(0)	N[+1972]	1299.53	3	3896.57	3896.58	0	-2.2	1565	Specific	243.58	119.11	119.11	4.83	175	>sp|P14410|SUIS_HUMAN Sucrase-isomaltase, intestinal OS=Homo sapiens GN=SI PE=1 SV=6	16726	Caco2P7_diffgpep1.14108.14108.3	controllerType=0 controllerNumber=1 scan=14108	66.6936
14446:3	1	R.RQDPASWN[+1971.719]ETFAEMSR.N	HexNAc(5)Hex(5)Fuc(1)NeuAc(0)	N[+1972]	1299.54	3	3896.59	3896.58	0	3.8	1565	Specific	251.77	119.31	119.31	5.39	175	>sp|P14410|SUIS_HUMAN Sucrase-isomaltase, intestinal OS=Homo sapiens GN=SI PE=1 SV=6	16726	Caco2P7_diffgpep1.14038.14038.3	controllerType=0 controllerNumber=1 scan=14038	66.3503
14616:3	1	R.RQDPASWN[+1809.666]ETFAEMSR.N	HexNAc(5)Hex(4)Fuc(1)NeuAc(0)	N[+1810]	1245.51	3	3734.53	3734.53	0	0	1565	Specific	260.95	123.24	123.24	5.68	175	>sp|P14410|SUIS_HUMAN Sucrase-isomaltase, intestinal OS=Homo sapiens GN=SI PE=1 SV=6	16726	Caco2P7_diffgpep1.14187.14187.3	controllerType=0 controllerNumber=1 scan=14187	67.0808
14285:3	1	R.RQDPASWN[+1864.634]ETFAEMSR.N	HexNAc(2)Hex(9)Fuc(0)NeuAc(0)	N[+1865]	1263.84	3	3789.52	3789.49	0	6.6	1565	Specific	262.53	131.6	131.6	5.41	175	>sp|P14410|SUIS_HUMAN Sucrase-isomaltase, intestinal OS=Homo sapiens GN=SI PE=1 SV=6	16726	Caco2P7_diffgpep1.13909.13909.3	controllerType=0 controllerNumber=1 scan=13909	65.726
14732:3	1	R.RQDPASWN[+1606.587]ETFAEMSR.N	HexNAc(4)Hex(4)Fuc(1)NeuAc(0)	N[+1607]	1177.82	3	3531.45	3531.45	0	0.9	1565	Specific	365.17	214.33	214.33	6.74	175	>sp|P14410|SUIS_HUMAN Sucrase-isomaltase, intestinal OS=Homo sapiens GN=SI PE=1 SV=6	16726	Caco2P7_diffgpep1.14287.14287.3	controllerType=0 controllerNumber=1 scan=14287	67.5769
14245:3	1	R.RQDPASWN[+1864.634]ETFAEMSR.N	HexNAc(2)Hex(9)Fuc(0)NeuAc(0)	N[+1865]	1263.84	3	3789.5	3789.49	0	2.6	1565	Specific	410.4	272.4	272.4	7.05	175	>sp|P14410|SUIS_HUMAN Sucrase-isomaltase, intestinal OS=Homo sapiens GN=SI PE=1 SV=6	16726	Caco2P7_diffgpep1.13875.13875.3	controllerType=0 controllerNumber=1 scan=13875	65.5648
17057:3	1	R.GQFQTFN[+2684.968]ASYDTINLHVR.G	HexNAc(7)Hex(6)Fuc(0)NeuAc(1)	N[+2685]	1599.34	3	4796.02	4796	0	4.3	1669	Specific	72.61	61.85	42.48	2.17	175	>sp|P14410|SUIS_HUMAN Sucrase-isomaltase, intestinal OS=Homo sapiens GN=SI PE=1 SV=6	16726	Caco2P7_diffgpep1.16139.16139.3	controllerType=0 controllerNumber=1 scan=16139	76.6361
17292:3	1	R.GQFQTFN[+2336.851]ASYDTINLHVR.G	HexNAc(6)Hex(6)Fuc(1)NeuAc(0)	N[+2337]	1483.31	3	4447.92	4447.88	0	8.6	1669	Specific	128.39	99.13	99.13	2.1	175	>sp|P14410|SUIS_HUMAN Sucrase-isomaltase, intestinal OS=Homo sapiens GN=SI PE=1 SV=6	16726	Caco2P7_diffgpep1.16320.16320.3	controllerType=0 controllerNumber=1 scan=16320	77.5367
19109:4	1	R.GQFQTFN[+2936.057]ASYDTINLHVR.G	HexNAc(6)Hex(7)Fuc(2)NeuAc(1)	N[+2936]	1262.53	4	5047.09	5047.09	0	0.5	1669	Specific	134.23	82.23	11.31	2.4	175	>sp|P14410|SUIS_HUMAN Sucrase-isomaltase, intestinal OS=Homo sapiens GN=SI PE=1 SV=6	16726	Caco2P7_diffgpep1.17718.17718.4	controllerType=0 controllerNumber=1 scan=17718	84.3927
19432:3	1	R.GQFQTFN[+2262.814]ASYDTINLHVR.G	HexNAc(5)Hex(5)Fuc(1)NeuAc(1)	N[+2263]	1458.29	3	4372.86	4373.84	-1	4.5	1669	Specific	162.58	58.29	58.29	2.01	175	>sp|P14410|SUIS_HUMAN Sucrase-isomaltase, intestinal OS=Homo sapiens GN=SI PE=1 SV=6	16726	Caco2P7_diffgpep1.17979.17979.3	controllerType=0 controllerNumber=1 scan=17979	85.6357
16854:3	1	R.GQFQTFN[+2538.935]ASYDTINLHVR.G	HexNAc(5)Hex(4)Fuc(4)NeuAc(1)	N[+2539]	1550.65	3	4649.95	4649.97	0	-4.3	1669	Specific	169.89	83.4	20.67	2.02	175	>sp|P14410|SUIS_HUMAN Sucrase-isomaltase, intestinal OS=Homo sapiens GN=SI PE=1 SV=6	16726	Caco2P7_diffgpep1.15978.15978.3	controllerType=0 controllerNumber=1 scan=15978	75.8347
19059:4	1	R.GQFQTFN[+2789.999]ASYDTINLHVR.G	HexNAc(6)Hex(7)Fuc(1)NeuAc(1)	N[+2790]	1226.01	4	4901.04	4901.03	0	1.3	1669	Specific	184.79	94.91	33.42	2.01	175	>sp|P14410|SUIS_HUMAN Sucrase-isomaltase, intestinal OS=Homo sapiens GN=SI PE=1 SV=6	16726	Caco2P7_diffgpep1.17680.17680.4	controllerType=0 controllerNumber=1 scan=17680	84.2029
19088:4	1	R.GQFQTFN[+2936.057]ASYDTINLHVR.G	HexNAc(6)Hex(7)Fuc(2)NeuAc(1)	N[+2936]	1262.28	4	5046.08	5047.09	-1	-0.4	1669	Specific	185.43	78.36	29.14	2.05	175	>sp|P14410|SUIS_HUMAN Sucrase-isomaltase, intestinal OS=Homo sapiens GN=SI PE=1 SV=6	16726	Caco2P7_diffgpep1.17701.17701.4	controllerType=0 controllerNumber=1 scan=17701	84.3087
17045:3	1	R.GQFQTFN[+2685.988]ASYDTINLHVR.G	HexNAc(7)Hex(6)Fuc(2)NeuAc(0)	N[+2686]	1600.02	3	4798.04	4797.02	1	3.3	1669	Specific	197.9	110.12	110.12	3.92	175	>sp|P14410|SUIS_HUMAN Sucrase-isomaltase, intestinal OS=Homo sapiens GN=SI PE=1 SV=6	16726	Caco2P7_diffgpep1.16129.16129.3	controllerType=0 controllerNumber=1 scan=16129	76.5857
19448:4	1	R.GQFQTFN[+2262.814]ASYDTINLHVR.G	HexNAc(5)Hex(5)Fuc(1)NeuAc(1)	N[+2263]	1094.22	4	4373.87	4373.84	0	6	1669	Specific	199.84	102.4	14.95	2.32	175	>sp|P14410|SUIS_HUMAN Sucrase-isomaltase, intestinal OS=Homo sapiens GN=SI PE=1 SV=6	16726	Caco2P7_diffgpep1.17995.17995.4	controllerType=0 controllerNumber=1 scan=17995	85.703
17110:3	1	R.GQFQTFN[+2336.851]ASYDTINLHVR.G	HexNAc(6)Hex(6)Fuc(1)NeuAc(0)	N[+2337]	1483.3	3	4447.88	4447.88	0	-0.6	1669	Specific	216.02	107.29	107.29	2.61	175	>sp|P14410|SUIS_HUMAN Sucrase-isomaltase, intestinal OS=Homo sapiens GN=SI PE=1 SV=6	16726	Caco2P7_diffgpep1.16179.16179.3	controllerType=0 controllerNumber=1 scan=16179	76.8376
18912:4	1	R.GQFQTFN[+3139.137]ASYDTINLHVR.G	HexNAc(7)Hex(7)Fuc(2)NeuAc(1)	N[+3139]	1313.3	4	5250.18	5250.17	0	3.3	1669	Specific	219.87	143.33	20.76	4.09	175	>sp|P14410|SUIS_HUMAN Sucrase-isomaltase, intestinal OS=Homo sapiens GN=SI PE=1 SV=6	16726	Caco2P7_diffgpep1.17570.17570.4	controllerType=0 controllerNumber=1 scan=17570	83.6759
16839:4	1	R.GQFQTFN[+3066.120]ASYDTINLHVR.G	HexNAc(6)Hex(6)Fuc(4)NeuAc(1)	N[+3066]	1295.3	4	5178.16	5177.15	1	0.8	1669	Specific	238.03	147.07	147.07	5.48	175	>sp|P14410|SUIS_HUMAN Sucrase-isomaltase, intestinal OS=Homo sapiens GN=SI PE=1 SV=6	16726	Caco2P7_diffgpep1.15967.15967.4	controllerType=0 controllerNumber=1 scan=15967	75.7797
17406:4	1	R.GQFQTFN[+1955.724]ASYDTINLHVR.G	HexNAc(5)Hex(4)Fuc(2)NeuAc(0)	N[+1956]	1017.45	4	4066.76	4066.75	0	2.6	1669	Specific	238.66	136.86	13.27	5.21	175	>sp|P14410|SUIS_HUMAN Sucrase-isomaltase, intestinal OS=Homo sapiens GN=SI PE=1 SV=6	16726	Caco2P7_diffgpep1.16413.16413.4	controllerType=0 controllerNumber=1 scan=16413	78.0087
16846:3	1	R.GQFQTFN[+2538.935]ASYDTINLHVR.G	HexNAc(5)Hex(4)Fuc(4)NeuAc(1)	N[+2539]	1550.66	3	4649.96	4649.97	0	-2.1	1669	Specific	245.42	99.93	19.99	4.61	175	>sp|P14410|SUIS_HUMAN Sucrase-isomaltase, intestinal OS=Homo sapiens GN=SI PE=1 SV=6	16726	Caco2P7_diffgpep1.15972.15972.3	controllerType=0 controllerNumber=1 scan=15972	75.8068
17281:3	1	R.GQFQTFN[+2336.851]ASYDTINLHVR.G	HexNAc(6)Hex(6)Fuc(1)NeuAc(0)	N[+2337]	1483.31	3	4447.92	4447.88	0	9.3	1669	Specific	253.07	211.9	211.9	5.44	175	>sp|P14410|SUIS_HUMAN Sucrase-isomaltase, intestinal OS=Homo sapiens GN=SI PE=1 SV=6	16726	Caco2P7_diffgpep1.16311.16311.3	controllerType=0 controllerNumber=1 scan=16311	77.4918
18953:4	1	R.GQFQTFN[+2936.057]ASYDTINLHVR.G	HexNAc(6)Hex(7)Fuc(2)NeuAc(1)	N[+2936]	1262.53	4	5047.09	5047.09	0	1.3	1669	Specific	262.94	116.96	32.21	5.6	175	>sp|P14410|SUIS_HUMAN Sucrase-isomaltase, intestinal OS=Homo sapiens GN=SI PE=1 SV=6	16726	Caco2P7_diffgpep1.17603.17603.4	controllerType=0 controllerNumber=1 scan=17603	83.8355
18997:4	1	R.GQFQTFN[+2789.999]ASYDTINLHVR.G	HexNAc(6)Hex(7)Fuc(1)NeuAc(1)	N[+2790]	1226.02	4	4901.05	4901.03	0	4.2	1669	Specific	263.72	176.11	19.99	4.92	175	>sp|P14410|SUIS_HUMAN Sucrase-isomaltase, intestinal OS=Homo sapiens GN=SI PE=1 SV=6	16726	Caco2P7_diffgpep1.17639.17639.4	controllerType=0 controllerNumber=1 scan=17639	84.0078
18971:4	1	R.GQFQTFN[+2936.057]ASYDTINLHVR.G	HexNAc(6)Hex(7)Fuc(2)NeuAc(1)	N[+2936]	1262.53	4	5047.1	5047.09	0	2.7	1669	Specific	277.26	203.44	22.84	6.18	175	>sp|P14410|SUIS_HUMAN Sucrase-isomaltase, intestinal OS=Homo sapiens GN=SI PE=1 SV=6	16726	Caco2P7_diffgpep1.17618.17618.4	controllerType=0 controllerNumber=1 scan=17618	83.9094
17484:3	1	R.GQFQTFN[+1606.587]ASYDTINLHVR.G	HexNAc(4)Hex(4)Fuc(1)NeuAc(0)	N[+1607]	1239.88	3	3717.63	3717.62	0	4	1669	Specific	294.06	161.07	161.07	5.54	175	>sp|P14410|SUIS_HUMAN Sucrase-isomaltase, intestinal OS=Homo sapiens GN=SI PE=1 SV=6	16726	Caco2P7_diffgpep1.16473.16473.3	controllerType=0 controllerNumber=1 scan=16473	78.3189
16933:4	1	R.GQFQTFN[+3139.137]ASYDTINLHVR.G	HexNAc(7)Hex(7)Fuc(2)NeuAc(1)	N[+3139]	1313.55	4	5251.19	5250.17	1	4.7	1669	Specific	295	209.63	10.24	5.87	175	>sp|P14410|SUIS_HUMAN Sucrase-isomaltase, intestinal OS=Homo sapiens GN=SI PE=1 SV=6	16726	Caco2P7_diffgpep1.16043.16043.4	controllerType=0 controllerNumber=1 scan=16043	76.1568
17029:3	1	R.GQFQTFN[+2700.988]ASYDTINLHVR.G	HexNAc(5)Hex(5)Fuc(4)NeuAc(1)	N[+2701]	1605.02	3	4813.03	4812.02	1	2	1669	Specific	321.87	234.86	31.36	6.85	175	>sp|P14410|SUIS_HUMAN Sucrase-isomaltase, intestinal OS=Homo sapiens GN=SI PE=1 SV=6	16726	Caco2P7_diffgpep1.16118.16118.3	controllerType=0 controllerNumber=1 scan=16118	76.53
16704:4	1	R.GQFQTFN[+3049.105]ASYDTINLHVR.G	HexNAc(6)Hex(5)Fuc(3)NeuAc(2)	N[+3049]	1291.05	4	5161.17	5160.14	1	5.3	1669	Specific	331.6	202.19	202.19	5.94	175	>sp|P14410|SUIS_HUMAN Sucrase-isomaltase, intestinal OS=Homo sapiens GN=SI PE=1 SV=6	16726	Caco2P7_diffgpep1.15870.15870.4	controllerType=0 controllerNumber=1 scan=15870	75.2975
17314:3	1	R.GQFQTFN[+2174.798]ASYDTINLHVR.G	HexNAc(6)Hex(5)Fuc(1)NeuAc(0)	N[+2175]	1429.29	3	4285.85	4285.83	0	4.3	1669	Specific	331.61	257.22	257.22	6.41	175	>sp|P14410|SUIS_HUMAN Sucrase-isomaltase, intestinal OS=Homo sapiens GN=SI PE=1 SV=6	16726	Caco2P7_diffgpep1.16338.16338.3	controllerType=0 controllerNumber=1 scan=16338	77.6261
19478:4	1	R.GQFQTFN[+2100.761]ASYDTINLHVR.G	HexNAc(5)Hex(4)Fuc(1)NeuAc(1)	N[+2101]	1053.71	4	4211.81	4211.79	0	4	1669	Specific	332.59	183.36	18.64	6.36	175	>sp|P14410|SUIS_HUMAN Sucrase-isomaltase, intestinal OS=Homo sapiens GN=SI PE=1 SV=6	16726	Caco2P7_diffgpep1.18018.18018.4	controllerType=0 controllerNumber=1 scan=18018	85.8088
17438:3	1	R.GQFQTFN[+1702.581]ASYDTINLHVR.G	HexNAc(2)Hex(8)Fuc(0)NeuAc(0)	N[+1703]	1271.88	3	3813.61	3813.61	0	-0.3	1669	Specific	335.96	228.81	228.81	6.47	175	>sp|P14410|SUIS_HUMAN Sucrase-isomaltase, intestinal OS=Homo sapiens GN=SI PE=1 SV=6	16726	Caco2P7_diffgpep1.16437.16437.3	controllerType=0 controllerNumber=1 scan=16437	78.138
16678:4	1	R.GQFQTFN[+3066.120]ASYDTINLHVR.G	HexNAc(6)Hex(6)Fuc(4)NeuAc(1)	N[+3066]	1295.3	4	5178.16	5177.15	1	1.5	1669	Specific	343.14	183.33	183.33	6.49	175	>sp|P14410|SUIS_HUMAN Sucrase-isomaltase, intestinal OS=Homo sapiens GN=SI PE=1 SV=6	16726	Caco2P7_diffgpep1.15849.15849.4	controllerType=0 controllerNumber=1 scan=15849	75.1913
17371:4	1	R.GQFQTFN[+1971.719]ASYDTINLHVR.G	HexNAc(5)Hex(5)Fuc(1)NeuAc(0)	N[+1972]	1021.44	4	4082.75	4082.75	0	1	1669	Specific	352.55	280.87	280.87	6.65	175	>sp|P14410|SUIS_HUMAN Sucrase-isomaltase, intestinal OS=Homo sapiens GN=SI PE=1 SV=6	16726	Caco2P7_diffgpep1.16385.16385.4	controllerType=0 controllerNumber=1 scan=16385	77.8611
16731:4	1	R.GQFQTFN[+3066.120]ASYDTINLHVR.G	HexNAc(6)Hex(6)Fuc(4)NeuAc(1)	N[+3066]	1295.3	4	5178.17	5177.15	1	2.2	1669	Specific	354.79	229.67	229.67	6.58	175	>sp|P14410|SUIS_HUMAN Sucrase-isomaltase, intestinal OS=Homo sapiens GN=SI PE=1 SV=6	16726	Caco2P7_diffgpep1.15887.15887.4	controllerType=0 controllerNumber=1 scan=15887	75.3816
17372:4	1	R.GQFQTFN[+1809.666]ASYDTINLHVR.G	HexNAc(5)Hex(4)Fuc(1)NeuAc(0)	N[+1810]	980.932	4	3920.71	3920.7	0	2.3	1669	Specific	403.93	265.83	265.83	6.81	175	>sp|P14410|SUIS_HUMAN Sucrase-isomaltase, intestinal OS=Homo sapiens GN=SI PE=1 SV=6	16726	Caco2P7_diffgpep1.16386.16386.4	controllerType=0 controllerNumber=1 scan=16386	77.8666
17357:4	1	R.GQFQTFN[+1809.666]ASYDTINLHVR.G	HexNAc(5)Hex(4)Fuc(1)NeuAc(0)	N[+1810]	980.932	4	3920.71	3920.7	0	2.3	1669	Specific	406.35	290.59	290.59	6.93	175	>sp|P14410|SUIS_HUMAN Sucrase-isomaltase, intestinal OS=Homo sapiens GN=SI PE=1 SV=6	16726	Caco2P7_diffgpep1.16374.16374.4	controllerType=0 controllerNumber=1 scan=16374	77.8054
17521:3	1	R.GQFQTFN[+1663.608]ASYDTINLHVR.G	HexNAc(5)Hex(4)Fuc(0)NeuAc(0)	N[+1664]	1258.89	3	3774.66	3774.64	0	4.5	1669	Specific	416.84	304.27	304.27	6.88	175	>sp|P14410|SUIS_HUMAN Sucrase-isomaltase, intestinal OS=Homo sapiens GN=SI PE=1 SV=6	16726	Caco2P7_diffgpep1.16500.16500.3	controllerType=0 controllerNumber=1 scan=16500	78.4512
17009:3	1	R.GQFQTFN[+2538.935]ASYDTINLHVR.G	HexNAc(5)Hex(4)Fuc(4)NeuAc(1)	N[+2539]	1551.01	3	4651.01	4649.97	1	8.2	1669	Specific	417.93	380.18	31.98	8.5	175	>sp|P14410|SUIS_HUMAN Sucrase-isomaltase, intestinal OS=Homo sapiens GN=SI PE=1 SV=6	16726	Caco2P7_diffgpep1.16103.16103.3	controllerType=0 controllerNumber=1 scan=16103	76.4563
17368:3	1	R.GQFQTFN[+1971.719]ASYDTINLHVR.G	HexNAc(5)Hex(5)Fuc(1)NeuAc(0)	N[+1972]	1361.26	3	4081.75	4082.75	-1	1.7	1669	Specific	420.33	261.98	261.98	7.2	175	>sp|P14410|SUIS_HUMAN Sucrase-isomaltase, intestinal OS=Homo sapiens GN=SI PE=1 SV=6	16726	Caco2P7_diffgpep1.16383.16383.3	controllerType=0 controllerNumber=1 scan=16383	77.85
17411:3	1	R.GQFQTFN[+1702.581]ASYDTINLHVR.G	HexNAc(2)Hex(8)Fuc(0)NeuAc(0)	N[+1703]	1271.88	3	3813.63	3813.61	0	4.8	1669	Specific	437.34	277.71	277.71	6.76	175	>sp|P14410|SUIS_HUMAN Sucrase-isomaltase, intestinal OS=Homo sapiens GN=SI PE=1 SV=6	16726	Caco2P7_diffgpep1.16417.16417.3	controllerType=0 controllerNumber=1 scan=16417	78.0368
17017:4	1	R.GQFQTFN[+2538.935]ASYDTINLHVR.G	HexNAc(5)Hex(4)Fuc(4)NeuAc(1)	N[+2539]	1163.5	4	4650.97	4649.97	1	0.4	1669	Specific	441.64	291.21	18.57	7.07	175	>sp|P14410|SUIS_HUMAN Sucrase-isomaltase, intestinal OS=Homo sapiens GN=SI PE=1 SV=6	16726	Caco2P7_diffgpep1.16109.16109.4	controllerType=0 controllerNumber=1 scan=16109	76.4846
17054:4	1	R.GQFQTFN[+2700.988]ASYDTINLHVR.G	HexNAc(5)Hex(5)Fuc(4)NeuAc(1)	N[+2701]	1204.01	4	4813.03	4812.02	1	1.3	1669	Specific	446.7	290.22	19.08	7.19	175	>sp|P14410|SUIS_HUMAN Sucrase-isomaltase, intestinal OS=Homo sapiens GN=SI PE=1 SV=6	16726	Caco2P7_diffgpep1.16136.16136.4	controllerType=0 controllerNumber=1 scan=16136	76.6195
17132:3	1	R.GQFQTFN[+2174.798]ASYDTINLHVR.G	HexNAc(6)Hex(5)Fuc(1)NeuAc(0)	N[+2175]	1429.28	3	4285.84	4285.83	0	1.9	1669	Specific	453.35	256.74	256.74	7.26	175	>sp|P14410|SUIS_HUMAN Sucrase-isomaltase, intestinal OS=Homo sapiens GN=SI PE=1 SV=6	16726	Caco2P7_diffgpep1.16195.16195.3	controllerType=0 controllerNumber=1 scan=16195	76.9167
19487:3	1	R.GQFQTFN[+2100.761]ASYDTINLHVR.G	HexNAc(5)Hex(4)Fuc(1)NeuAc(1)	N[+2101]	1404.6	3	4211.8	4211.79	0	1.4	1669	Specific	468.07	367.89	42.29	7.94	175	>sp|P14410|SUIS_HUMAN Sucrase-isomaltase, intestinal OS=Homo sapiens GN=SI PE=1 SV=6	16726	Caco2P7_diffgpep1.18028.18028.3	controllerType=0 controllerNumber=1 scan=18028	85.855
17381:3	1	R.GQFQTFN[+1809.666]ASYDTINLHVR.G	HexNAc(5)Hex(4)Fuc(1)NeuAc(0)	N[+1810]	1307.57	3	3920.7	3920.7	0	2	1669	Specific	586.48	410.43	410.43	11.19	175	>sp|P14410|SUIS_HUMAN Sucrase-isomaltase, intestinal OS=Homo sapiens GN=SI PE=1 SV=6	16726	Caco2P7_diffgpep1.16393.16393.3	controllerType=0 controllerNumber=1 scan=16393	77.9003
17370:3	1	R.GQFQTFN[+1864.634]ASYDTINLHVR.G	HexNAc(2)Hex(9)Fuc(0)NeuAc(0)	N[+1865]	1325.89	3	3975.67	3975.66	0	0.3	1669	Specific	603.78	466.79	466.79	12.07	175	>sp|P14410|SUIS_HUMAN Sucrase-isomaltase, intestinal OS=Homo sapiens GN=SI PE=1 SV=6	16726	Caco2P7_diffgpep1.16384.16384.3	controllerType=0 controllerNumber=1 scan=16384	77.8557
00639:2	1	R.GYIN[+1378.476]K.S	HexNAc(2)Hex(6)Fuc(0)NeuAc(0)	N[+1378]	986.907	2	1972.81	1972.8	0	3.3	1760	Specific	287.43	75.39	75.39	2.39	175	>sp|P14410|SUIS_HUMAN Sucrase-isomaltase, intestinal OS=Homo sapiens GN=SI PE=1 SV=6	16726	Caco2P7_diffgpep1.2318.2318.2	controllerType=0 controllerNumber=1 scan=2318	10.4262
00516:2	1	R.GYIN[+1864.634]K.S	HexNAc(2)Hex(9)Fuc(0)NeuAc(0)	N[+1865]	1229.99	2	2458.97	2458.96	0	2.5	1760	Specific	311.59	75.27	75.27	2.43	175	>sp|P14410|SUIS_HUMAN Sucrase-isomaltase, intestinal OS=Homo sapiens GN=SI PE=1 SV=6	16726	Caco2P7_diffgpep1.2181.2181.2	controllerType=0 controllerNumber=1 scan=2181	9.8587
00545:2	1	R.GYIN[+1540.529]K.S	HexNAc(2)Hex(7)Fuc(0)NeuAc(0)	N[+1541]	1067.93	2	2134.85	2134.85	0	-0.9	1760	Specific	324.52	75.45	75.45	2.39	175	>sp|P14410|SUIS_HUMAN Sucrase-isomaltase, intestinal OS=Homo sapiens GN=SI PE=1 SV=6	16726	Caco2P7_diffgpep1.2231.2231.2	controllerType=0 controllerNumber=1 scan=2231	10.0536
00531:2	1	R.GYIN[+1702.581]K.S	HexNAc(2)Hex(8)Fuc(0)NeuAc(0)	N[+1703]	1148.96	2	2296.91	2296.91	0	3.3	1760	Specific	329.95	51.04	51.04	2.33	175	>sp|P14410|SUIS_HUMAN Sucrase-isomaltase, intestinal OS=Homo sapiens GN=SI PE=1 SV=6	16726	Caco2P7_diffgpep1.2203.2203.2	controllerType=0 controllerNumber=1 scan=2203	9.9453
24874:3	1	R.IDLTTHN[+1809.666]VTLEEPIEINWS.-	HexNAc(5)Hex(4)Fuc(1)NeuAc(0)	N[+1810]	1345.27	3	4033.8	4033.78	0	4.2	1809	CRagged	174.07	91.33	37.54	2.39	175	>sp|P14410|SUIS_HUMAN Sucrase-isomaltase, intestinal OS=Homo sapiens GN=SI PE=1 SV=6	16726	Caco2P7_diffgpep1.22858.22858.3	controllerType=0 controllerNumber=1 scan=22858	107.734
26500:3	1	R.IDLTTHN[+2059.735]VTLEEPIEINWS.-	HexNAc(4)Hex(5)Fuc(1)NeuAc(1)	N[+2060]	1428.62	3	4283.86	4283.85	0	2.3	1809	CRagged	177.29	124.66	27.92	3.81	175	>sp|P14410|SUIS_HUMAN Sucrase-isomaltase, intestinal OS=Homo sapiens GN=SI PE=1 SV=6	16726	Caco2P7_diffgpep1.25047.25047.3	controllerType=0 controllerNumber=1 scan=25047	116.741
26512:4	1	R.IDLTTHN[+2262.814]VTLEEPIEINWS.-	HexNAc(5)Hex(5)Fuc(1)NeuAc(1)	N[+2263]	1122.49	4	4486.95	4486.93	0	3.9	1809	CRagged	185.51	125.12	22.02	2.57	175	>sp|P14410|SUIS_HUMAN Sucrase-isomaltase, intestinal OS=Homo sapiens GN=SI PE=1 SV=6	16726	Caco2P7_diffgpep1.25062.25062.4	controllerType=0 controllerNumber=1 scan=25062	116.804
26324:4	1	R.IDLTTHN[+2774.004]VTLEEPIEINWS.-	HexNAc(6)Hex(6)Fuc(2)NeuAc(1)	N[+2774]	1250.29	4	4998.13	4998.12	0	2.6	1809	CRagged	193.56	127.17	15.78	2.02	175	>sp|P14410|SUIS_HUMAN Sucrase-isomaltase, intestinal OS=Homo sapiens GN=SI PE=1 SV=6	16726	Caco2P7_diffgpep1.24816.24816.4	controllerType=0 controllerNumber=1 scan=24816	115.802
28171:4	1	R.IDLTTHN[+2554.930]VTLEEPIEINWS.-	HexNAc(5)Hex(5)Fuc(3)NeuAc(1)	N[+2555]	1195.27	4	4778.05	4779.04	-1	1.2	1809	CRagged	212.98	176.89	19.64	4.08	175	>sp|P14410|SUIS_HUMAN Sucrase-isomaltase, intestinal OS=Homo sapiens GN=SI PE=1 SV=6	16726	Caco2P7_diffgpep1.27688.27688.4	controllerType=0 controllerNumber=1 scan=27688	127.579
24860:3	1	R.IDLTTHN[+1809.666]VTLEEPIEINWS.-	HexNAc(5)Hex(4)Fuc(1)NeuAc(0)	N[+1810]	1345.27	3	4033.78	4033.78	0	0.6	1809	CRagged	221.69	154.37	28.63	4.82	175	>sp|P14410|SUIS_HUMAN Sucrase-isomaltase, intestinal OS=Homo sapiens GN=SI PE=1 SV=6	16726	Caco2P7_diffgpep1.22844.22844.3	controllerType=0 controllerNumber=1 scan=22844	107.677
24759:3	1	R.IDLTTHN[+1971.719]VTLEEPIEINWS.-	HexNAc(5)Hex(5)Fuc(1)NeuAc(0)	N[+1972]	1399.28	3	4195.84	4195.83	0	1	1809	CRagged	230.62	124.55	27.86	5.23	175	>sp|P14410|SUIS_HUMAN Sucrase-isomaltase, intestinal OS=Homo sapiens GN=SI PE=1 SV=6	16726	Caco2P7_diffgpep1.22725.22725.3	controllerType=0 controllerNumber=1 scan=22725	107.182
26428:3	1	R.IDLTTHN[+2262.814]VTLEEPIEINWS.-	HexNAc(5)Hex(5)Fuc(1)NeuAc(1)	N[+2263]	1496.32	3	4486.94	4486.93	0	2.4	1809	CRagged	274.15	108.67	31.76	5.47	175	>sp|P14410|SUIS_HUMAN Sucrase-isomaltase, intestinal OS=Homo sapiens GN=SI PE=1 SV=6	16726	Caco2P7_diffgpep1.24963.24963.3	controllerType=0 controllerNumber=1 scan=24963	116.398
26469:3	1	R.IDLTTHN[+2059.735]VTLEEPIEINWS.-	HexNAc(4)Hex(5)Fuc(1)NeuAc(1)	N[+2060]	1428.29	3	4282.85	4283.85	-1	1.8	1809	CRagged	286.48	174.65	46.31	6.12	175	>sp|P14410|SUIS_HUMAN Sucrase-isomaltase, intestinal OS=Homo sapiens GN=SI PE=1 SV=6	16726	Caco2P7_diffgpep1.25009.25009.3	controllerType=0 controllerNumber=1 scan=25009	116.582
26317:4	1	R.IDLTTHN[+2774.004]VTLEEPIEINWS.-	HexNAc(6)Hex(6)Fuc(2)NeuAc(1)	N[+2774]	1250.03	4	4997.12	4998.12	-1	0.4	1809	CRagged	296.71	168.25	19.53	5.12	175	>sp|P14410|SUIS_HUMAN Sucrase-isomaltase, intestinal OS=Homo sapiens GN=SI PE=1 SV=6	16726	Caco2P7_diffgpep1.24803.24803.4	controllerType=0 controllerNumber=1 scan=24803	115.751
26312:4	1	R.IDLTTHN[+2627.947]VTLEEPIEINWS.-	HexNAc(6)Hex(6)Fuc(1)NeuAc(1)	N[+2628]	1213.77	4	4852.06	4852.06	0	0.8	1809	CRagged	307.83	212.25	35.63	6.09	175	>sp|P14410|SUIS_HUMAN Sucrase-isomaltase, intestinal OS=Homo sapiens GN=SI PE=1 SV=6	16726	Caco2P7_diffgpep1.24795.24795.4	controllerType=0 controllerNumber=1 scan=24795	115.721
26472:3	1	R.IDLTTHN[+2262.814]VTLEEPIEINWS.-	HexNAc(5)Hex(5)Fuc(1)NeuAc(1)	N[+2263]	1496.32	3	4486.95	4486.93	0	4.3	1809	CRagged	367.08	186.22	24.59	6.15	175	>sp|P14410|SUIS_HUMAN Sucrase-isomaltase, intestinal OS=Homo sapiens GN=SI PE=1 SV=6	16726	Caco2P7_diffgpep1.25012.25012.3	controllerType=0 controllerNumber=1 scan=25012	116.594
26432:4	1	R.IDLTTHN[+2262.814]VTLEEPIEINWS.-	HexNAc(5)Hex(5)Fuc(1)NeuAc(1)	N[+2263]	1122.24	4	4485.94	4486.93	-1	4	1809	CRagged	383.48	258.16	75.94	6.33	175	>sp|P14410|SUIS_HUMAN Sucrase-isomaltase, intestinal OS=Homo sapiens GN=SI PE=1 SV=6	16726	Caco2P7_diffgpep1.24966.24966.4	controllerType=0 controllerNumber=1 scan=24966	116.411
24804:3	1	R.IDLTTHN[+1971.719]VTLEEPIEINWS.-	HexNAc(5)Hex(5)Fuc(1)NeuAc(0)	N[+1972]	1399.28	3	4195.83	4195.83	0	0.4	1809	CRagged	415.69	243.63	70.45	6.77	175	>sp|P14410|SUIS_HUMAN Sucrase-isomaltase, intestinal OS=Homo sapiens GN=SI PE=1 SV=6	16726	Caco2P7_diffgpep1.22783.22783.3	controllerType=0 controllerNumber=1 scan=22783	107.422
17910:4	2	R.IPN[+2920.062]NTQWVTWSPVGHK.L	HexNAc(6)Hex(6)Fuc(3)NeuAc(1)	N[+2920]	1197.01	4	4785.02	4784.01	1	1.5	148	Specific	202.18	103.42	29.94	3.03	112	>sp|P27487|DPP4_HUMAN Dipeptidyl peptidase 4 OS=Homo sapiens GN=DPP4 PE=1 SV=2	4838	Caco2P7_diffgpep1.16794.16794.4	controllerType=0 controllerNumber=1 scan=16794	79.9236
18383:3	2	R.IPN[+2262.814]NTQWVTWSPVGHK.L	HexNAc(5)Hex(5)Fuc(1)NeuAc(1)	N[+2263]	1376.26	3	4126.78	4126.76	0	3.1	148	Specific	226.02	73.74	53.44	4.73	112	>sp|P27487|DPP4_HUMAN Dipeptidyl peptidase 4 OS=Homo sapiens GN=DPP4 PE=1 SV=2	4838	Caco2P7_diffgpep1.17156.17156.3	controllerType=0 controllerNumber=1 scan=17156	81.6746
18073:4	2	R.IPN[+2774.004]NTQWVTWSPVGHK.L	HexNAc(6)Hex(6)Fuc(2)NeuAc(1)	N[+2774]	1160.25	4	4637.96	4637.95	0	2	148	Specific	254.65	144.21	20.33	5.79	112	>sp|P27487|DPP4_HUMAN Dipeptidyl peptidase 4 OS=Homo sapiens GN=DPP4 PE=1 SV=2	4838	Caco2P7_diffgpep1.16916.16916.4	controllerType=0 controllerNumber=1 scan=16916	80.5116
20576:4	2	R.IPN[+2919.042]NTQWVTWSPVGHK.L	HexNAc(6)Hex(6)Fuc(1)NeuAc(2)	N[+2919]	1196.26	4	4782.01	4782.99	-1	3.6	148	Specific	269.63	155.74	155.74	5.89	112	>sp|P27487|DPP4_HUMAN Dipeptidyl peptidase 4 OS=Homo sapiens GN=DPP4 PE=1 SV=2	4838	Caco2P7_diffgpep1.18921.18921.4	controllerType=0 controllerNumber=1 scan=18921	90.0824
18152:3	2	R.IPN[+2262.814]NTQWVTWSPVGHK.L	HexNAc(5)Hex(5)Fuc(1)NeuAc(1)	N[+2263]	1376.27	3	4126.79	4126.76	0	5.9	148	Specific	276.61	148.69	47.63	5.72	112	>sp|P27487|DPP4_HUMAN Dipeptidyl peptidase 4 OS=Homo sapiens GN=DPP4 PE=1 SV=2	4838	Caco2P7_diffgpep1.16975.16975.3	controllerType=0 controllerNumber=1 scan=16975	80.7931
20759:3	2	R.IPN[+2554.930]NTQWVTWSPVGHK.L	HexNAc(5)Hex(5)Fuc(3)NeuAc(1)	N[+2555]	1473.31	3	4417.91	4418.88	-1	7.9	148	Specific	296.27	161.03	161.03	5.65	112	>sp|P27487|DPP4_HUMAN Dipeptidyl peptidase 4 OS=Homo sapiens GN=DPP4 PE=1 SV=2	4838	Caco2P7_diffgpep1.19072.19072.3	controllerType=0 controllerNumber=1 scan=19072	90.8253
18169:3	2	R.IPN[+2262.814]NTQWVTWSPVGHK.L	HexNAc(5)Hex(5)Fuc(1)NeuAc(1)	N[+2263]	1376.26	3	4126.78	4126.76	0	3.5	148	Specific	319.08	151.69	69.03	6.25	112	>sp|P27487|DPP4_HUMAN Dipeptidyl peptidase 4 OS=Homo sapiens GN=DPP4 PE=1 SV=2	4838	Caco2P7_diffgpep1.16988.16988.3	controllerType=0 controllerNumber=1 scan=16988	80.8559
28632:5	2	K.FFVVNTDSLSSVTN[+2319.836]ATSIQITAPASMLIGDHYLC[+57.021]DVTWATQER.I	HexNAc(6)Hex(5)Fuc(0)NeuAc(1)	C[+57], N[+2320]	1416.64	5	7079.15	7079.14	0	1.8	268	Specific	237.08	219.27	33.49	6.38	112	>sp|P27487|DPP4_HUMAN Dipeptidyl peptidase 4 OS=Homo sapiens GN=DPP4 PE=1 SV=2	4838	Caco2P7_diffgpep1.28786.28786.5	controllerType=0 controllerNumber=1 scan=28786	132.1
16632:4	2	R.RIQN[+2116.756]YSVMDIC[+57.021]DYDESSGR.W	HexNAc(5)Hex(5)Fuc(0)NeuAc(1)	C[+57], N[+2117]	1106.69	4	4423.75	4424.75	-1	1	318	Specific	155.46	77.95	77.95	2.27	112	>sp|P27487|DPP4_HUMAN Dipeptidyl peptidase 4 OS=Homo sapiens GN=DPP4 PE=1 SV=2	4838	Caco2P7_diffgpep1.15815.15815.4	controllerType=0 controllerNumber=1 scan=15815	75.0226
16651:4	2	R.RIQN[+2116.756]YSVMDIC[+57.021]DYDESSGR.W	HexNAc(5)Hex(5)Fuc(0)NeuAc(1)	C[+57], N[+2117]	1106.95	4	4424.77	4424.75	0	3.1	318	Specific	155.79	74.07	26.63	2.27	112	>sp|P27487|DPP4_HUMAN Dipeptidyl peptidase 4 OS=Homo sapiens GN=DPP4 PE=1 SV=2	4838	Caco2P7_diffgpep1.15828.15828.4	controllerType=0 controllerNumber=1 scan=15828	75.0893
14688:3	2	R.RIQN[+1946.687]YSVMDIC[+57.021]DYDESSGR.W	HexNAc(4)Hex(7)Fuc(0)NeuAc(0)	C[+57], N[+1947]	1419.23	3	4255.68	4254.68	1	-0.9	318	Specific	189.33	76.64	76.64	2.04	112	>sp|P27487|DPP4_HUMAN Dipeptidyl peptidase 4 OS=Homo sapiens GN=DPP4 PE=1 SV=2	4838	Caco2P7_diffgpep1.14244.14244.3	controllerType=0 controllerNumber=1 scan=14244	67.366
16791:3	2	R.RIQN[+1710.598]YSVMDIC[+57.021]DYDESSGR.W	HexNAc(3)Hex(5)Fuc(0)NeuAc(1)	C[+57], N[+1711]	1339.87	3	4017.6	4018.59	-1	2.9	318	Specific	203.74	109	109	3.9	112	>sp|P27487|DPP4_HUMAN Dipeptidyl peptidase 4 OS=Homo sapiens GN=DPP4 PE=1 SV=2	4838	Caco2P7_diffgpep1.15932.15932.3	controllerType=0 controllerNumber=1 scan=15932	75.6083
16506:4	2	R.RIQN[+2424.867]YSVMDIC[+57.021]DYDESSGR.W	HexNAc(5)Hex(6)Fuc(1)NeuAc(1)	C[+57], N[+2425]	1183.97	4	4732.85	4732.86	0	-3	318	Specific	225.71	137.21	36.69	4.62	112	>sp|P27487|DPP4_HUMAN Dipeptidyl peptidase 4 OS=Homo sapiens GN=DPP4 PE=1 SV=2	4838	Caco2P7_diffgpep1.15713.15713.4	controllerType=0 controllerNumber=1 scan=15713	74.5191
18724:4	2	R.RIQN[+2569.905]YSVMDIC[+57.021]DYDESSGR.W	HexNAc(5)Hex(6)Fuc(0)NeuAc(2)	C[+57], N[+2570]	1220.23	4	4877.91	4877.9	0	1.3	318	Specific	232.22	155.19	10.65	5.6	112	>sp|P27487|DPP4_HUMAN Dipeptidyl peptidase 4 OS=Homo sapiens GN=DPP4 PE=1 SV=2	4838	Caco2P7_diffgpep1.17421.17421.4	controllerType=0 controllerNumber=1 scan=17421	82.9534
16669:3	2	R.RIQN[+2075.730]YSVMDIC[+57.021]DYDESSGR.W	HexNAc(4)Hex(6)Fuc(0)NeuAc(1)	C[+57], N[+2076]	1461.58	3	4382.73	4383.73	-1	2	318	Specific	237.22	151.59	151.59	5.82	112	>sp|P27487|DPP4_HUMAN Dipeptidyl peptidase 4 OS=Homo sapiens GN=DPP4 PE=1 SV=2	4838	Caco2P7_diffgpep1.15842.15842.3	controllerType=0 controllerNumber=1 scan=15842	75.1572
16591:4	2	R.RIQN[+2075.730]YSVMDIC[+57.021]DYDESSGR.W	HexNAc(4)Hex(6)Fuc(0)NeuAc(1)	C[+57], N[+2076]	1096.69	4	4383.72	4383.73	0	-1.7	318	Specific	243.54	143.69	38.17	5.12	112	>sp|P27487|DPP4_HUMAN Dipeptidyl peptidase 4 OS=Homo sapiens GN=DPP4 PE=1 SV=2	4838	Caco2P7_diffgpep1.15781.15781.4	controllerType=0 controllerNumber=1 scan=15781	74.8542
14795:3	2	R.RIQN[+1784.634]YSVMDIC[+57.021]DYDESSGR.W	HexNAc(4)Hex(6)Fuc(0)NeuAc(0)	C[+57], N[+1785]	1364.54	3	4091.62	4092.63	-1	-2.8	318	Specific	252.71	110.74	110.74	4.81	112	>sp|P27487|DPP4_HUMAN Dipeptidyl peptidase 4 OS=Homo sapiens GN=DPP4 PE=1 SV=2	4838	Caco2P7_diffgpep1.14341.14341.3	controllerType=0 controllerNumber=1 scan=14341	67.8501
16543:3	2	R.RIQN[+2116.756]YSVMDIC[+57.021]DYDESSGR.W	HexNAc(5)Hex(5)Fuc(0)NeuAc(1)	C[+57], N[+2117]	1475.26	3	4423.77	4424.75	-1	5.5	318	Specific	254.95	171.56	171.56	5.48	112	>sp|P27487|DPP4_HUMAN Dipeptidyl peptidase 4 OS=Homo sapiens GN=DPP4 PE=1 SV=2	4838	Caco2P7_diffgpep1.15742.15742.3	controllerType=0 controllerNumber=1 scan=15742	74.6622
16472:3	2	R.RIQN[+2237.783]YSVMDIC[+57.021]DYDESSGR.W	HexNAc(4)Hex(7)Fuc(0)NeuAc(1)	C[+57], N[+2238]	1515.6	3	4544.79	4545.78	-1	2.4	318	Specific	263.82	177.98	177.98	6.21	112	>sp|P27487|DPP4_HUMAN Dipeptidyl peptidase 4 OS=Homo sapiens GN=DPP4 PE=1 SV=2	4838	Caco2P7_diffgpep1.15685.15685.3	controllerType=0 controllerNumber=1 scan=15685	74.3828
16600:4	2	R.RIQN[+2221.788]YSVMDIC[+57.021]DYDESSGR.W	HexNAc(4)Hex(6)Fuc(1)NeuAc(1)	C[+57], N[+2222]	1133.2	4	4529.79	4529.78	0	1.5	318	Specific	266.16	173.77	173.77	6.12	112	>sp|P27487|DPP4_HUMAN Dipeptidyl peptidase 4 OS=Homo sapiens GN=DPP4 PE=1 SV=2	4838	Caco2P7_diffgpep1.15788.15788.4	controllerType=0 controllerNumber=1 scan=15788	74.8878
16763:3	2	R.RIQN[+1710.598]YSVMDIC[+57.021]DYDESSGR.W	HexNAc(3)Hex(5)Fuc(0)NeuAc(1)	C[+57], N[+1711]	1340.2	3	4018.59	4018.59	0	0.1	318	Specific	269.17	138.45	64.03	5.68	112	>sp|P27487|DPP4_HUMAN Dipeptidyl peptidase 4 OS=Homo sapiens GN=DPP4 PE=1 SV=2	4838	Caco2P7_diffgpep1.15910.15910.3	controllerType=0 controllerNumber=1 scan=15910	75.4989
16398:4	2	R.RIQN[+2383.841]YSVMDIC[+57.021]DYDESSGR.W	HexNAc(4)Hex(7)Fuc(1)NeuAc(1)	C[+57], N[+2384]	1173.71	4	4691.83	4691.84	0	-1.5	318	Specific	272.1	139.23	139.23	5.15	112	>sp|P27487|DPP4_HUMAN Dipeptidyl peptidase 4 OS=Homo sapiens GN=DPP4 PE=1 SV=2	4838	Caco2P7_diffgpep1.15625.15625.4	controllerType=0 controllerNumber=1 scan=15625	74.0816
16394:4	2	R.RIQN[+2383.841]YSVMDIC[+57.021]DYDESSGR.W	HexNAc(4)Hex(7)Fuc(1)NeuAc(1)	C[+57], N[+2384]	1173.71	4	4691.83	4691.84	0	-1.2	318	Specific	286.29	144.95	144.95	5.41	112	>sp|P27487|DPP4_HUMAN Dipeptidyl peptidase 4 OS=Homo sapiens GN=DPP4 PE=1 SV=2	4838	Caco2P7_diffgpep1.15620.15620.4	controllerType=0 controllerNumber=1 scan=15620	74.0586
18749:4	2	R.RIQN[+2407.852]YSVMDIC[+57.021]DYDESSGR.W	HexNAc(5)Hex(5)Fuc(0)NeuAc(2)	C[+57], N[+2408]	1179.47	4	4714.87	4715.85	-1	5.5	318	Specific	295.71	188.82	188.82	5.72	112	>sp|P27487|DPP4_HUMAN Dipeptidyl peptidase 4 OS=Homo sapiens GN=DPP4 PE=1 SV=2	4838	Caco2P7_diffgpep1.17439.17439.4	controllerType=0 controllerNumber=1 scan=17439	83.0396
16559:4	2	R.RIQN[+1872.651]YSVMDIC[+57.021]DYDESSGR.W	HexNAc(3)Hex(6)Fuc(0)NeuAc(1)	C[+57], N[+1873]	1045.92	4	4180.65	4180.65	0	0.2	318	Specific	296.77	184.19	38.59	6.2	112	>sp|P27487|DPP4_HUMAN Dipeptidyl peptidase 4 OS=Homo sapiens GN=DPP4 PE=1 SV=2	4838	Caco2P7_diffgpep1.15756.15756.4	controllerType=0 controllerNumber=1 scan=15756	74.7301
16588:4	2	R.RIQN[+2221.788]YSVMDIC[+57.021]DYDESSGR.W	HexNAc(4)Hex(6)Fuc(1)NeuAc(1)	C[+57], N[+2222]	1133.21	4	4529.8	4529.78	0	3.4	318	Specific	314	181.25	181.25	6.24	112	>sp|P27487|DPP4_HUMAN Dipeptidyl peptidase 4 OS=Homo sapiens GN=DPP4 PE=1 SV=2	4838	Caco2P7_diffgpep1.15779.15779.4	controllerType=0 controllerNumber=1 scan=15779	74.843
16527:4	2	R.RIQN[+2262.814]YSVMDIC[+57.021]DYDESSGR.W	HexNAc(5)Hex(5)Fuc(1)NeuAc(1)	C[+57], N[+2263]	1143.46	4	4570.8	4570.81	0	-2.5	318	Specific	330.45	233.12	33.79	5.87	112	>sp|P27487|DPP4_HUMAN Dipeptidyl peptidase 4 OS=Homo sapiens GN=DPP4 PE=1 SV=2	4838	Caco2P7_diffgpep1.15728.15728.4	controllerType=0 controllerNumber=1 scan=15728	74.5924
18791:4	2	R.RIQN[+2407.852]YSVMDIC[+57.021]DYDESSGR.W	HexNAc(5)Hex(5)Fuc(0)NeuAc(2)	C[+57], N[+2408]	1179.72	4	4715.86	4715.85	0	3.4	318	Specific	404.44	304.32	19.07	6.94	112	>sp|P27487|DPP4_HUMAN Dipeptidyl peptidase 4 OS=Homo sapiens GN=DPP4 PE=1 SV=2	4838	Caco2P7_diffgpep1.17472.17472.4	controllerType=0 controllerNumber=1 scan=17472	83.2029
16436:4	2	R.RIQN[+2237.783]YSVMDIC[+57.021]DYDESSGR.W	HexNAc(4)Hex(7)Fuc(0)NeuAc(1)	C[+57], N[+2238]	1137.2	4	4545.77	4545.78	0	-2.6	318	Specific	405.22	185.85	40.87	6.04	112	>sp|P27487|DPP4_HUMAN Dipeptidyl peptidase 4 OS=Homo sapiens GN=DPP4 PE=1 SV=2	4838	Caco2P7_diffgpep1.15656.15656.4	controllerType=0 controllerNumber=1 scan=15656	74.2374
13550:3	2	R.IQN[+1930.692]YSVMDIC[+57.021]DYDESSGR.W	HexNAc(4)Hex(6)Fuc(1)NeuAc(0)	C[+57], N[+1931]	1361.2	3	4081.6	4082.59	-1	2.8	319	Specific	130.3	49.95	49.95	2.02	112	>sp|P27487|DPP4_HUMAN Dipeptidyl peptidase 4 OS=Homo sapiens GN=DPP4 PE=1 SV=2	4838	Caco2P7_diffgpep1.13312.13312.3	controllerType=0 controllerNumber=1 scan=13312	62.7871
21843:3	2	R.IQN[+2407.852]YSVMDIC[+57.021]DYDESSGR.W	HexNAc(5)Hex(5)Fuc(0)NeuAc(2)	C[+57], N[+2408]	1520.92	3	4560.74	4559.75	1	-2.7	319	Specific	209.63	135.74	13.2	2.34	112	>sp|P27487|DPP4_HUMAN Dipeptidyl peptidase 4 OS=Homo sapiens GN=DPP4 PE=1 SV=2	4838	Caco2P7_diffgpep1.20030.20030.3	controllerType=0 controllerNumber=1 scan=20030	95.1355
19227:4	2	R.IQN[+2278.809]YSVMDIC[+57.021]DYDESSGR.W	HexNAc(5)Hex(6)Fuc(0)NeuAc(1)	C[+57], N[+2279]	1108.18	4	4429.71	4430.7	-1	1.3	319	Specific	273.25	132.23	132.23	4.65	112	>sp|P27487|DPP4_HUMAN Dipeptidyl peptidase 4 OS=Homo sapiens GN=DPP4 PE=1 SV=2	4838	Caco2P7_diffgpep1.17816.17816.4	controllerType=0 controllerNumber=1 scan=17816	84.8762
19253:4	2	R.IQN[+2278.809]YSVMDIC[+57.021]DYDESSGR.W	HexNAc(5)Hex(6)Fuc(0)NeuAc(1)	C[+57], N[+2279]	1108.43	4	4430.7	4430.7	0	-1.2	319	Specific	275.03	87.34	38.84	2.43	112	>sp|P27487|DPP4_HUMAN Dipeptidyl peptidase 4 OS=Homo sapiens GN=DPP4 PE=1 SV=2	4838	Caco2P7_diffgpep1.17835.17835.4	controllerType=0 controllerNumber=1 scan=17835	84.9677
17052:3	2	R.IQN[+1971.719]YSVMDIC[+57.021]DYDESSGR.W	HexNAc(5)Hex(5)Fuc(1)NeuAc(0)	C[+57], N[+1972]	1375.55	3	4124.64	4123.61	1	5.5	319	Specific	276.3	196.74	196.74	5.72	112	>sp|P27487|DPP4_HUMAN Dipeptidyl peptidase 4 OS=Homo sapiens GN=DPP4 PE=1 SV=2	4838	Caco2P7_diffgpep1.16134.16134.3	controllerType=0 controllerNumber=1 scan=16134	76.6128
19481:3	2	R.IQN[+2075.730]YSVMDIC[+57.021]DYDESSGR.W	HexNAc(4)Hex(6)Fuc(0)NeuAc(1)	C[+57], N[+2076]	1409.87	3	4227.6	4227.63	0	-6.4	319	Specific	315.48	209.4	209.4	5.2	112	>sp|P27487|DPP4_HUMAN Dipeptidyl peptidase 4 OS=Homo sapiens GN=DPP4 PE=1 SV=2	4838	Caco2P7_diffgpep1.18021.18021.3	controllerType=0 controllerNumber=1 scan=18021	85.825
16986:3	2	R.IQN[+1946.687]YSVMDIC[+57.021]DYDESSGR.W	HexNAc(4)Hex(7)Fuc(0)NeuAc(0)	C[+57], N[+1947]	1366.87	3	4098.58	4098.58	0	0.2	319	Specific	342.67	213.6	213.6	6.38	112	>sp|P27487|DPP4_HUMAN Dipeptidyl peptidase 4 OS=Homo sapiens GN=DPP4 PE=1 SV=2	4838	Caco2P7_diffgpep1.16081.16081.3	controllerType=0 controllerNumber=1 scan=16081	76.3494
19262:4	2	R.IQN[+2424.867]YSVMDIC[+57.021]DYDESSGR.W	HexNAc(5)Hex(6)Fuc(1)NeuAc(1)	C[+57], N[+2425]	1144.94	4	4576.74	4576.76	0	-4.8	319	Specific	357.84	235.2	38.7	5.28	112	>sp|P27487|DPP4_HUMAN Dipeptidyl peptidase 4 OS=Homo sapiens GN=DPP4 PE=1 SV=2	4838	Caco2P7_diffgpep1.17841.17841.4	controllerType=0 controllerNumber=1 scan=17841	84.9967
19236:3	2	R.IQN[+2262.814]YSVMDIC[+57.021]DYDESSGR.W	HexNAc(5)Hex(5)Fuc(1)NeuAc(1)	C[+57], N[+2263]	1471.91	3	4413.71	4414.71	-1	0.8	319	Specific	399.59	288.75	288.75	6.76	112	>sp|P27487|DPP4_HUMAN Dipeptidyl peptidase 4 OS=Homo sapiens GN=DPP4 PE=1 SV=2	4838	Caco2P7_diffgpep1.17821.17821.3	controllerType=0 controllerNumber=1 scan=17821	84.9035
17173:3	2	R.IQN[+1784.634]YSVMDIC[+57.021]DYDESSGR.W	HexNAc(4)Hex(6)Fuc(0)NeuAc(0)	C[+57], N[+1785]	1312.85	3	3936.54	3936.53	0	2.6	319	Specific	401.92	273.49	273.49	6.81	112	>sp|P27487|DPP4_HUMAN Dipeptidyl peptidase 4 OS=Homo sapiens GN=DPP4 PE=1 SV=2	4838	Caco2P7_diffgpep1.16228.16228.3	controllerType=0 controllerNumber=1 scan=16228	77.0798
19274:3	2	R.IQN[+1913.677]YSVMDIC[+57.021]DYDESSGR.W	HexNAc(4)Hex(5)Fuc(0)NeuAc(1)	C[+57], N[+1914]	1355.53	3	4064.57	4065.57	-1	0	319	Specific	420.75	286.94	286.94	6.71	112	>sp|P27487|DPP4_HUMAN Dipeptidyl peptidase 4 OS=Homo sapiens GN=DPP4 PE=1 SV=2	4838	Caco2P7_diffgpep1.17854.17854.3	controllerType=0 controllerNumber=1 scan=17854	85.0594
19305:3	2	R.IQN[+2116.756]YSVMDIC[+57.021]DYDESSGR.W	HexNAc(5)Hex(5)Fuc(0)NeuAc(1)	C[+57], N[+2117]	1423.56	3	4268.67	4268.65	0	5.2	319	Specific	434.74	329.8	27.08	6.83	112	>sp|P27487|DPP4_HUMAN Dipeptidyl peptidase 4 OS=Homo sapiens GN=DPP4 PE=1 SV=2	4838	Caco2P7_diffgpep1.17881.17881.3	controllerType=0 controllerNumber=1 scan=17881	85.1816
19286:3	2	R.IQN[+2262.814]YSVMDIC[+57.021]DYDESSGR.W	HexNAc(5)Hex(5)Fuc(1)NeuAc(1)	C[+57], N[+2263]	1472.25	3	4414.73	4414.71	0	3.6	319	Specific	448.46	328.41	25.8	7.22	112	>sp|P27487|DPP4_HUMAN Dipeptidyl peptidase 4 OS=Homo sapiens GN=DPP4 PE=1 SV=2	4838	Caco2P7_diffgpep1.17865.17865.3	controllerType=0 controllerNumber=1 scan=17865	85.1102
19221:4	2	R.IQN[+2262.814]YSVMDIC[+57.021]DYDESSGR.W	HexNAc(5)Hex(5)Fuc(1)NeuAc(1)	C[+57], N[+2263]	1104.18	4	4413.7	4414.71	-1	-0.5	319	Specific	455.81	284.2	284.2	6.59	112	>sp|P27487|DPP4_HUMAN Dipeptidyl peptidase 4 OS=Homo sapiens GN=DPP4 PE=1 SV=2	4838	Caco2P7_diffgpep1.17810.17810.4	controllerType=0 controllerNumber=1 scan=17810	84.8475
19273:3	2	R.IQN[+2262.814]YSVMDIC[+57.021]DYDESSGR.W	HexNAc(5)Hex(5)Fuc(1)NeuAc(1)	C[+57], N[+2263]	1472.25	3	4414.74	4414.71	0	6.6	319	Specific	460.1	331.98	24.32	6.72	112	>sp|P27487|DPP4_HUMAN Dipeptidyl peptidase 4 OS=Homo sapiens GN=DPP4 PE=1 SV=2	4838	Caco2P7_diffgpep1.17853.17853.3	controllerType=0 controllerNumber=1 scan=17853	85.054
19175:3	2	R.IQN[+2237.783]YSVMDIC[+57.021]DYDESSGR.W	HexNAc(4)Hex(7)Fuc(0)NeuAc(1)	C[+57], N[+2238]	1463.9	3	4389.69	4389.68	0	1.9	319	Specific	474.4	320.02	37.95	7.22	112	>sp|P27487|DPP4_HUMAN Dipeptidyl peptidase 4 OS=Homo sapiens GN=DPP4 PE=1 SV=2	4838	Caco2P7_diffgpep1.17775.17775.3	controllerType=0 controllerNumber=1 scan=17775	84.6734
19279:3	2	R.IQN[+2221.788]YSVMDIC[+57.021]DYDESSGR.W	HexNAc(4)Hex(6)Fuc(1)NeuAc(1)	C[+57], N[+2222]	1458.56	3	4373.67	4373.68	0	-3.6	319	Specific	499.48	335.16	335.16	6.68	112	>sp|P27487|DPP4_HUMAN Dipeptidyl peptidase 4 OS=Homo sapiens GN=DPP4 PE=1 SV=2	4838	Caco2P7_diffgpep1.17859.17859.3	controllerType=0 controllerNumber=1 scan=17859	85.0813
21820:4	2	R.IQN[+2407.852]YSVMDIC[+57.021]DYDESSGR.W	HexNAc(5)Hex(5)Fuc(0)NeuAc(2)	C[+57], N[+2408]	1140.69	4	4559.76	4559.75	0	2	319	Specific	500.24	368.12	12.35	7.66	112	>sp|P27487|DPP4_HUMAN Dipeptidyl peptidase 4 OS=Homo sapiens GN=DPP4 PE=1 SV=2	4838	Caco2P7_diffgpep1.20011.20011.4	controllerType=0 controllerNumber=1 scan=20011	95.0482
19162:4	2	R.IQN[+2237.783]YSVMDIC[+57.021]DYDESSGR.W	HexNAc(4)Hex(7)Fuc(0)NeuAc(1)	C[+57], N[+2238]	1098.18	4	4389.68	4389.68	0	0.4	319	Specific	516.93	367.37	43.26	7.54	112	>sp|P27487|DPP4_HUMAN Dipeptidyl peptidase 4 OS=Homo sapiens GN=DPP4 PE=1 SV=2	4838	Caco2P7_diffgpep1.17763.17763.4	controllerType=0 controllerNumber=1 scan=17763	84.6119
19265:4	2	R.IQN[+2262.814]YSVMDIC[+57.021]DYDESSGR.W	HexNAc(5)Hex(5)Fuc(1)NeuAc(1)	C[+57], N[+2263]	1104.43	4	4414.72	4414.71	0	1.8	319	Specific	531.09	371	31.06	7.77	112	>sp|P27487|DPP4_HUMAN Dipeptidyl peptidase 4 OS=Homo sapiens GN=DPP4 PE=1 SV=2	4838	Caco2P7_diffgpep1.17845.17845.4	controllerType=0 controllerNumber=1 scan=17845	85.0142
19258:4	2	R.IQN[+2116.756]YSVMDIC[+57.021]DYDESSGR.W	HexNAc(5)Hex(5)Fuc(0)NeuAc(1)	C[+57], N[+2117]	1067.92	4	4268.67	4268.65	0	4.2	319	Specific	539.37	382.76	23.93	8.99	112	>sp|P27487|DPP4_HUMAN Dipeptidyl peptidase 4 OS=Homo sapiens GN=DPP4 PE=1 SV=2	4838	Caco2P7_diffgpep1.17839.17839.4	controllerType=0 controllerNumber=1 scan=17839	84.9858
19303:3	2	R.IQN[+2221.788]YSVMDIC[+57.021]DYDESSGR.W	HexNAc(4)Hex(6)Fuc(1)NeuAc(1)	C[+57], N[+2222]	1458.56	3	4373.67	4373.68	0	-3.6	319	Specific	574.84	405.21	405.21	8.88	112	>sp|P27487|DPP4_HUMAN Dipeptidyl peptidase 4 OS=Homo sapiens GN=DPP4 PE=1 SV=2	4838	Caco2P7_diffgpep1.17880.17880.3	controllerType=0 controllerNumber=1 scan=17880	85.1759
19358:3	2	R.IQN[+1872.651]YSVMDIC[+57.021]DYDESSGR.W	HexNAc(3)Hex(6)Fuc(0)NeuAc(1)	C[+57], N[+1873]	1342.19	3	4024.57	4024.55	0	5.1	319	Specific	591.85	449.58	37.16	10.49	112	>sp|P27487|DPP4_HUMAN Dipeptidyl peptidase 4 OS=Homo sapiens GN=DPP4 PE=1 SV=2	4838	Caco2P7_diffgpep1.17920.17920.3	controllerType=0 controllerNumber=1 scan=17920	85.3659
19389:3	2	R.IQN[+2075.730]YSVMDIC[+57.021]DYDESSGR.W	HexNAc(4)Hex(6)Fuc(0)NeuAc(1)	C[+57], N[+2076]	1409.88	3	4227.62	4227.63	0	-0.8	319	Specific	593.48	430.79	56.62	10.57	112	>sp|P27487|DPP4_HUMAN Dipeptidyl peptidase 4 OS=Homo sapiens GN=DPP4 PE=1 SV=2	4838	Caco2P7_diffgpep1.17944.17944.3	controllerType=0 controllerNumber=1 scan=17944	85.4731
19408:4	2	R.IQN[+2075.730]YSVMDIC[+57.021]DYDESSGR.W	HexNAc(4)Hex(6)Fuc(0)NeuAc(1)	C[+57], N[+2076]	1057.66	4	4227.62	4227.63	0	-2.1	319	Specific	676.36	509.71	45.21	12	112	>sp|P27487|DPP4_HUMAN Dipeptidyl peptidase 4 OS=Homo sapiens GN=DPP4 PE=1 SV=2	4838	Caco2P7_diffgpep1.17960.17960.4	controllerType=0 controllerNumber=1 scan=17960	85.5479
16571:3	2	K.KLDFIILN[+2627.947]ETK.F	HexNAc(6)Hex(6)Fuc(1)NeuAc(1)	N[+2628]	1321.24	3	3961.72	3961.72	0	-0.9	513	Specific	183.67	112.75	112.75	2.09	112	>sp|P27487|DPP4_HUMAN Dipeptidyl peptidase 4 OS=Homo sapiens GN=DPP4 PE=1 SV=2	4838	Caco2P7_diffgpep1.15766.15766.3	controllerType=0 controllerNumber=1 scan=15766	74.7807
14457:3	2	K.KLDFIILN[+2076.750]ETK.F	HexNAc(4)Hex(6)Fuc(2)NeuAc(0)	N[+2077]	1137.52	3	3410.53	3410.52	0	3.1	513	Specific	207.03	164.41	164.41	2.84	112	>sp|P27487|DPP4_HUMAN Dipeptidyl peptidase 4 OS=Homo sapiens GN=DPP4 PE=1 SV=2	4838	Caco2P7_diffgpep1.14049.14049.3	controllerType=0 controllerNumber=1 scan=14049	66.4022
14326:3	2	K.KLDFIILN[+1768.640]ETK.F	HexNAc(4)Hex(5)Fuc(1)NeuAc(0)	N[+1769]	1034.81	3	3102.41	3102.41	0	-0.2	513	Specific	240.47	72.72	72.72	4.04	112	>sp|P27487|DPP4_HUMAN Dipeptidyl peptidase 4 OS=Homo sapiens GN=DPP4 PE=1 SV=2	4838	Caco2P7_diffgpep1.13942.13942.3	controllerType=0 controllerNumber=1 scan=13942	65.8843
16883:3	2	K.KLDFIILN[+2262.814]ETK.F	HexNAc(5)Hex(5)Fuc(1)NeuAc(1)	N[+2263]	1199.53	3	3596.59	3596.59	0	-0.5	513	Specific	249.97	133.08	133.08	4.73	112	>sp|P27487|DPP4_HUMAN Dipeptidyl peptidase 4 OS=Homo sapiens GN=DPP4 PE=1 SV=2	4838	Caco2P7_diffgpep1.16001.16001.3	controllerType=0 controllerNumber=1 scan=16001	75.9516
16937:3	2	K.KLDFIILN[+2408.872]ETK.F	HexNAc(5)Hex(5)Fuc(2)NeuAc(1)	N[+2409]	1248.22	3	3742.65	3742.64	0	1.2	513	Specific	270.36	128.73	128.73	5.26	112	>sp|P27487|DPP4_HUMAN Dipeptidyl peptidase 4 OS=Homo sapiens GN=DPP4 PE=1 SV=2	4838	Caco2P7_diffgpep1.16045.16045.3	controllerType=0 controllerNumber=1 scan=16045	76.1677
17305:3	2	K.KLDFIILN[+1694.603]ETK.F	HexNAc(3)Hex(4)Fuc(1)NeuAc(1)	N[+1695]	1010.13	3	3028.39	3028.38	0	4.3	513	Specific	274.68	181.98	181.98	4.67	112	>sp|P27487|DPP4_HUMAN Dipeptidyl peptidase 4 OS=Homo sapiens GN=DPP4 PE=1 SV=2	4838	Caco2P7_diffgpep1.16330.16330.3	controllerType=0 controllerNumber=1 scan=16330	77.5866
14536:3	2	K.KLDFIILN[+1378.476]ETK.F	HexNAc(2)Hex(6)Fuc(0)NeuAc(0)	N[+1378]	904.755	3	2712.25	2712.25	0	0.4	513	Specific	284.02	145.96	145.96	5.53	112	>sp|P27487|DPP4_HUMAN Dipeptidyl peptidase 4 OS=Homo sapiens GN=DPP4 PE=1 SV=2	4838	Caco2P7_diffgpep1.14115.14115.3	controllerType=0 controllerNumber=1 scan=14115	66.7273
14155:3	2	K.KLDFIILN[+2263.835]ETK.F	HexNAc(5)Hex(5)Fuc(3)NeuAc(0)	N[+2264]	1199.88	3	3597.63	3597.61	0	6.3	513	Specific	288.33	177.78	177.78	5.05	112	>sp|P27487|DPP4_HUMAN Dipeptidyl peptidase 4 OS=Homo sapiens GN=DPP4 PE=1 SV=2	4838	Caco2P7_diffgpep1.13797.13797.3	controllerType=0 controllerNumber=1 scan=13797	65.1961
14158:3	2	K.KLDFIILN[+2263.835]ETK.F	HexNAc(5)Hex(5)Fuc(3)NeuAc(0)	N[+2264]	1199.87	3	3597.6	3597.61	0	-2.6	513	Specific	302.06	158.79	158.79	5	112	>sp|P27487|DPP4_HUMAN Dipeptidyl peptidase 4 OS=Homo sapiens GN=DPP4 PE=1 SV=2	4838	Caco2P7_diffgpep1.13800.13800.3	controllerType=0 controllerNumber=1 scan=13800	65.2082
17152:3	2	K.KLDFIILN[+1856.656]ETK.F	HexNAc(3)Hex(5)Fuc(1)NeuAc(1)	N[+1857]	1064.15	3	3190.44	3190.43	0	4.9	513	Specific	305.24	142.49	142.49	5.28	112	>sp|P27487|DPP4_HUMAN Dipeptidyl peptidase 4 OS=Homo sapiens GN=DPP4 PE=1 SV=2	4838	Caco2P7_diffgpep1.16212.16212.3	controllerType=0 controllerNumber=1 scan=16212	77.0009
14364:3	2	K.KLDFIILN[+2263.835]ETK.F	HexNAc(5)Hex(5)Fuc(3)NeuAc(0)	N[+2264]	1199.88	3	3597.63	3597.61	0	6.7	513	Specific	314.35	221.47	221.47	5.4	112	>sp|P27487|DPP4_HUMAN Dipeptidyl peptidase 4 OS=Homo sapiens GN=DPP4 PE=1 SV=2	4838	Caco2P7_diffgpep1.13973.13973.3	controllerType=0 controllerNumber=1 scan=13973	66.0367
14712:3	2	K.KLDFIILN[+1403.507]ETK.F	HexNAc(3)Hex(4)Fuc(1)NeuAc(0)	N[+1404]	913.097	3	2737.28	2737.28	0	-0.8	513	Specific	318.79	177.02	177.02	5.41	112	>sp|P27487|DPP4_HUMAN Dipeptidyl peptidase 4 OS=Homo sapiens GN=DPP4 PE=1 SV=2	4838	Caco2P7_diffgpep1.14268.14268.3	controllerType=0 controllerNumber=1 scan=14268	67.4837
19825:3	2	K.KLDFIILN[+2553.910]ETK.F	HexNAc(5)Hex(5)Fuc(1)NeuAc(2)	N[+2554]	1296.57	3	3887.69	3887.68	0	1.2	513	Specific	321.27	171.74	171.74	5.9	112	>sp|P27487|DPP4_HUMAN Dipeptidyl peptidase 4 OS=Homo sapiens GN=DPP4 PE=1 SV=2	4838	Caco2P7_diffgpep1.18330.18330.3	controllerType=0 controllerNumber=1 scan=18330	87.2087
14572:3	2	K.KLDFIILN[+1768.640]ETK.F	HexNAc(4)Hex(5)Fuc(1)NeuAc(0)	N[+1769]	1034.81	3	3102.41	3102.41	0	0.3	513	Specific	322.19	150.63	150.63	5.73	112	>sp|P27487|DPP4_HUMAN Dipeptidyl peptidase 4 OS=Homo sapiens GN=DPP4 PE=1 SV=2	4838	Caco2P7_diffgpep1.14150.14150.3	controllerType=0 controllerNumber=1 scan=14150	66.9004
16698:3	2	K.KLDFIILN[+2383.841]ETK.F	HexNAc(4)Hex(7)Fuc(1)NeuAc(1)	N[+2384]	1239.88	3	3717.62	3717.61	0	3.2	513	Specific	323.51	161.99	161.99	5.76	112	>sp|P27487|DPP4_HUMAN Dipeptidyl peptidase 4 OS=Homo sapiens GN=DPP4 PE=1 SV=2	4838	Caco2P7_diffgpep1.15864.15864.3	controllerType=0 controllerNumber=1 scan=15864	75.2687
14529:3	2	K.KLDFIILN[+1565.560]ETK.F	HexNAc(3)Hex(5)Fuc(1)NeuAc(0)	N[+1566]	967.119	3	2899.34	2899.33	0	3.4	513	Specific	327.9	58.53	58.53	4.33	112	>sp|P27487|DPP4_HUMAN Dipeptidyl peptidase 4 OS=Homo sapiens GN=DPP4 PE=1 SV=2	4838	Caco2P7_diffgpep1.14107.14107.3	controllerType=0 controllerNumber=1 scan=14107	66.6882
16476:3	2	K.KLDFIILN[+2554.930]ETK.F	HexNAc(5)Hex(5)Fuc(3)NeuAc(1)	N[+2555]	1296.91	3	3888.73	3888.7	0	7.1	513	Specific	341.23	123.53	123.53	4.92	112	>sp|P27487|DPP4_HUMAN Dipeptidyl peptidase 4 OS=Homo sapiens GN=DPP4 PE=1 SV=2	4838	Caco2P7_diffgpep1.15690.15690.3	controllerType=0 controllerNumber=1 scan=15690	74.4057
17164:3	2	K.KLDFIILN[+1710.598]ETK.F	HexNAc(3)Hex(5)Fuc(0)NeuAc(1)	N[+1711]	1015.46	3	3044.38	3044.37	0	2.5	513	Specific	342.04	200.42	200.42	5.93	112	>sp|P27487|DPP4_HUMAN Dipeptidyl peptidase 4 OS=Homo sapiens GN=DPP4 PE=1 SV=2	4838	Caco2P7_diffgpep1.16220.16220.3	controllerType=0 controllerNumber=1 scan=16220	77.0445
16681:3	2	K.KLDFIILN[+2383.841]ETK.F	HexNAc(4)Hex(7)Fuc(1)NeuAc(1)	N[+2384]	1239.87	3	3717.61	3717.61	0	-1.4	513	Specific	352.48	190.74	190.74	5.38	112	>sp|P27487|DPP4_HUMAN Dipeptidyl peptidase 4 OS=Homo sapiens GN=DPP4 PE=1 SV=2	4838	Caco2P7_diffgpep1.15851.15851.3	controllerType=0 controllerNumber=1 scan=15851	75.2021
14295:3	2	K.KLDFIILN[+2092.745]ETK.F	HexNAc(4)Hex(7)Fuc(1)NeuAc(0)	N[+2093]	1142.84	3	3426.51	3426.52	0	-3.6	513	Specific	355.64	242.96	242.96	5.38	112	>sp|P27487|DPP4_HUMAN Dipeptidyl peptidase 4 OS=Homo sapiens GN=DPP4 PE=1 SV=2	4838	Caco2P7_diffgpep1.13916.13916.3	controllerType=0 controllerNumber=1 scan=13916	65.7601
14528:3	2	K.KLDFIILN[+1809.666]ETK.F	HexNAc(5)Hex(4)Fuc(1)NeuAc(0)	N[+1810]	1048.49	3	3143.44	3143.44	0	0.9	513	Specific	389.26	134.03	134.03	5.57	112	>sp|P27487|DPP4_HUMAN Dipeptidyl peptidase 4 OS=Homo sapiens GN=DPP4 PE=1 SV=2	4838	Caco2P7_diffgpep1.14106.14106.3	controllerType=0 controllerNumber=1 scan=14106	66.6825
16931:3	2	K.KLDFIILN[+2221.788]ETK.F	HexNAc(4)Hex(6)Fuc(1)NeuAc(1)	N[+2222]	1185.86	3	3555.57	3555.56	0	1.9	513	Specific	394.56	221.53	221.53	6.26	112	>sp|P27487|DPP4_HUMAN Dipeptidyl peptidase 4 OS=Homo sapiens GN=DPP4 PE=1 SV=2	4838	Caco2P7_diffgpep1.16042.16042.3	controllerType=0 controllerNumber=1 scan=16042	76.1511
16569:3	2	K.KLDFIILN[+2408.872]ETK.F	HexNAc(5)Hex(5)Fuc(2)NeuAc(1)	N[+2409]	1248.22	3	3742.66	3742.64	0	3.7	513	Specific	403.69	246.52	246.52	6.29	112	>sp|P27487|DPP4_HUMAN Dipeptidyl peptidase 4 OS=Homo sapiens GN=DPP4 PE=1 SV=2	4838	Caco2P7_diffgpep1.15764.15764.3	controllerType=0 controllerNumber=1 scan=15764	74.7698
16785:3	2	K.KLDFIILN[+2205.793]ETK.F	HexNAc(4)Hex(5)Fuc(2)NeuAc(1)	N[+2206]	1180.53	3	3539.57	3539.57	0	1.8	513	Specific	404.91	258.19	258.19	6.45	112	>sp|P27487|DPP4_HUMAN Dipeptidyl peptidase 4 OS=Homo sapiens GN=DPP4 PE=1 SV=2	4838	Caco2P7_diffgpep1.15929.15929.3	controllerType=0 controllerNumber=1 scan=15929	75.592
16679:3	2	K.KLDFIILN[+2408.872]ETK.F	HexNAc(5)Hex(5)Fuc(2)NeuAc(1)	N[+2409]	1248.23	3	3742.67	3742.64	0	6.9	513	Specific	405.52	250.26	250.26	5.8	112	>sp|P27487|DPP4_HUMAN Dipeptidyl peptidase 4 OS=Homo sapiens GN=DPP4 PE=1 SV=2	4838	Caco2P7_diffgpep1.15850.15850.3	controllerType=0 controllerNumber=1 scan=15850	75.1967
14700:3	2	K.KLDFIILN[+1216.423]ETK.F	HexNAc(2)Hex(5)Fuc(0)NeuAc(0)	N[+1216]	850.738	3	2550.2	2550.2	0	1.6	513	Specific	415.43	189.86	189.86	6.35	112	>sp|P27487|DPP4_HUMAN Dipeptidyl peptidase 4 OS=Homo sapiens GN=DPP4 PE=1 SV=2	4838	Caco2P7_diffgpep1.14257.14257.3	controllerType=0 controllerNumber=1 scan=14257	67.4279
14496:3	2	K.KLDFIILN[+1581.555]ETK.F	HexNAc(3)Hex(6)Fuc(0)NeuAc(0)	N[+1582]	972.45	3	2915.33	2915.33	0	2.2	513	Specific	424.27	272.55	272.55	6.54	112	>sp|P27487|DPP4_HUMAN Dipeptidyl peptidase 4 OS=Homo sapiens GN=DPP4 PE=1 SV=2	4838	Caco2P7_diffgpep1.14074.14074.3	controllerType=0 controllerNumber=1 scan=14074	66.5255
14224:3	2	K.KLDFIILN[+2117.777]ETK.F	HexNAc(5)Hex(5)Fuc(2)NeuAc(0)	N[+2118]	1151.19	3	3451.56	3451.55	0	4.4	513	Specific	434.81	315.74	315.74	6.24	112	>sp|P27487|DPP4_HUMAN Dipeptidyl peptidase 4 OS=Homo sapiens GN=DPP4 PE=1 SV=2	4838	Caco2P7_diffgpep1.13857.13857.3	controllerType=0 controllerNumber=1 scan=13857	65.4748
16605:3	2	K.KLDFIILN[+2205.793]ETK.F	HexNAc(4)Hex(5)Fuc(2)NeuAc(1)	N[+2206]	1180.53	3	3539.56	3539.57	0	-1.3	513	Specific	438.12	253.41	253.41	5.82	112	>sp|P27487|DPP4_HUMAN Dipeptidyl peptidase 4 OS=Homo sapiens GN=DPP4 PE=1 SV=2	4838	Caco2P7_diffgpep1.15791.15791.3	controllerType=0 controllerNumber=1 scan=15791	74.9041
17120:3	2	K.KLDFIILN[+2100.761]ETK.F	HexNAc(5)Hex(4)Fuc(1)NeuAc(1)	N[+2101]	1145.52	3	3434.54	3434.53	0	2	513	Specific	443.34	195.65	195.65	6.47	112	>sp|P27487|DPP4_HUMAN Dipeptidyl peptidase 4 OS=Homo sapiens GN=DPP4 PE=1 SV=2	4838	Caco2P7_diffgpep1.16186.16186.3	controllerType=0 controllerNumber=1 scan=16186	76.8717
19664:3	2	K.KLDFIILN[+2553.910]ETK.F	HexNAc(5)Hex(5)Fuc(1)NeuAc(2)	N[+2554]	1296.57	3	3887.69	3887.68	0	2.4	513	Specific	444.64	301.87	301.87	6.66	112	>sp|P27487|DPP4_HUMAN Dipeptidyl peptidase 4 OS=Homo sapiens GN=DPP4 PE=1 SV=2	4838	Caco2P7_diffgpep1.18196.18196.3	controllerType=0 controllerNumber=1 scan=18196	86.5883
14354:3	2	K.KLDFIILN[+1727.613]ETK.F	HexNAc(3)Hex(6)Fuc(1)NeuAc(0)	N[+1728]	1021.14	3	3061.39	3061.39	0	2.1	513	Specific	457.57	312.19	312.19	6.79	112	>sp|P27487|DPP4_HUMAN Dipeptidyl peptidase 4 OS=Homo sapiens GN=DPP4 PE=1 SV=2	4838	Caco2P7_diffgpep1.13964.13964.3	controllerType=0 controllerNumber=1 scan=13964	65.9918
16611:3	2	K.KLDFIILN[+2205.793]ETK.F	HexNAc(4)Hex(5)Fuc(2)NeuAc(1)	N[+2206]	1180.53	3	3539.57	3539.57	0	0.5	513	Specific	458.01	300.13	300.13	6.63	112	>sp|P27487|DPP4_HUMAN Dipeptidyl peptidase 4 OS=Homo sapiens GN=DPP4 PE=1 SV=2	4838	Caco2P7_diffgpep1.15797.15797.3	controllerType=0 controllerNumber=1 scan=15797	74.9327
19690:4	2	K.KLDFIILN[+2553.910]ETK.F	HexNAc(5)Hex(5)Fuc(1)NeuAc(2)	N[+2554]	972.678	4	3887.69	3887.68	0	1.9	513	Specific	466.8	280.86	280.86	6.51	112	>sp|P27487|DPP4_HUMAN Dipeptidyl peptidase 4 OS=Homo sapiens GN=DPP4 PE=1 SV=2	4838	Caco2P7_diffgpep1.18219.18219.4	controllerType=0 controllerNumber=1 scan=18219	86.6936
17087:3	2	K.KLDFIILN[+2059.735]ETK.F	HexNAc(4)Hex(5)Fuc(1)NeuAc(1)	N[+2060]	1131.84	3	3393.51	3393.51	0	1.4	513	Specific	474.07	269.48	269.48	6.62	112	>sp|P27487|DPP4_HUMAN Dipeptidyl peptidase 4 OS=Homo sapiens GN=DPP4 PE=1 SV=2	4838	Caco2P7_diffgpep1.16159.16159.3	controllerType=0 controllerNumber=1 scan=16159	76.7368
14375:3	2	K.KLDFIILN[+2117.777]ETK.F	HexNAc(5)Hex(5)Fuc(2)NeuAc(0)	N[+2118]	1151.19	3	3451.56	3451.55	0	2.3	513	Specific	479.28	274.67	274.67	6.49	112	>sp|P27487|DPP4_HUMAN Dipeptidyl peptidase 4 OS=Homo sapiens GN=DPP4 PE=1 SV=2	4838	Caco2P7_diffgpep1.13982.13982.3	controllerType=0 controllerNumber=1 scan=13982	66.0774
16697:3	2	K.KLDFIILN[+2262.814]ETK.F	HexNAc(5)Hex(5)Fuc(1)NeuAc(1)	N[+2263]	1199.54	3	3596.59	3596.59	0	2.2	513	Specific	489.41	220.21	220.21	6.57	112	>sp|P27487|DPP4_HUMAN Dipeptidyl peptidase 4 OS=Homo sapiens GN=DPP4 PE=1 SV=2	4838	Caco2P7_diffgpep1.15863.15863.3	controllerType=0 controllerNumber=1 scan=15863	75.2633
19881:3	2	K.KLDFIILN[+2350.830]ETK.F	HexNAc(4)Hex(5)Fuc(1)NeuAc(2)	N[+2351]	1228.88	3	3684.62	3684.6	0	4.5	513	Specific	498.71	326.06	326.06	6.57	112	>sp|P27487|DPP4_HUMAN Dipeptidyl peptidase 4 OS=Homo sapiens GN=DPP4 PE=1 SV=2	4838	Caco2P7_diffgpep1.18379.18379.3	controllerType=0 controllerNumber=1 scan=18379	87.4357
17117:3	2	K.KLDFIILN[+1872.651]ETK.F	HexNAc(3)Hex(6)Fuc(0)NeuAc(1)	N[+1873]	1069.48	3	3206.43	3206.42	0	2.2	513	Specific	528.51	365.86	365.86	7.54	112	>sp|P27487|DPP4_HUMAN Dipeptidyl peptidase 4 OS=Homo sapiens GN=DPP4 PE=1 SV=2	4838	Caco2P7_diffgpep1.16184.16184.3	controllerType=0 controllerNumber=1 scan=16184	76.8605
14387:3	2	K.KLDFIILN[+1971.719]ETK.F	HexNAc(5)Hex(5)Fuc(1)NeuAc(0)	N[+1972]	1102.5	3	3305.5	3305.49	0	1.2	513	Specific	532.22	364.78	364.78	7.42	112	>sp|P27487|DPP4_HUMAN Dipeptidyl peptidase 4 OS=Homo sapiens GN=DPP4 PE=1 SV=2	4838	Caco2P7_diffgpep1.13991.13991.3	controllerType=0 controllerNumber=1 scan=13991	66.1222
16528:3	2	K.KLDFIILN[+2351.851]ETK.F	HexNAc(4)Hex(5)Fuc(3)NeuAc(1)	N[+2352]	1229.21	3	3685.63	3685.62	0	1.9	513	Specific	535.62	388.36	388.36	8.93	112	>sp|P27487|DPP4_HUMAN Dipeptidyl peptidase 4 OS=Homo sapiens GN=DPP4 PE=1 SV=2	4838	Caco2P7_diffgpep1.15729.15729.3	controllerType=0 controllerNumber=1 scan=15729	74.5982
16951:3	2	K.KLDFIILN[+1872.651]ETK.F	HexNAc(3)Hex(6)Fuc(0)NeuAc(1)	N[+1873]	1069.48	3	3206.43	3206.42	0	2	513	Specific	541.5	375.2	375.2	7.7	112	>sp|P27487|DPP4_HUMAN Dipeptidyl peptidase 4 OS=Homo sapiens GN=DPP4 PE=1 SV=2	4838	Caco2P7_diffgpep1.16055.16055.3	controllerType=0 controllerNumber=1 scan=16055	76.2181
16962:3	2	K.KLDFIILN[+2018.708]ETK.F	HexNAc(3)Hex(6)Fuc(1)NeuAc(1)	N[+2019]	1118.17	3	3352.5	3352.48	0	4.5	513	Specific	546.6	375.14	375.14	7.24	112	>sp|P27487|DPP4_HUMAN Dipeptidyl peptidase 4 OS=Homo sapiens GN=DPP4 PE=1 SV=2	4838	Caco2P7_diffgpep1.16063.16063.3	controllerType=0 controllerNumber=1 scan=16063	76.2576
16908:3	2	K.KLDFIILN[+2059.735]ETK.F	HexNAc(4)Hex(5)Fuc(1)NeuAc(1)	N[+2060]	1131.84	3	3393.51	3393.51	0	1.2	513	Specific	557.47	303.63	303.63	7.22	112	>sp|P27487|DPP4_HUMAN Dipeptidyl peptidase 4 OS=Homo sapiens GN=DPP4 PE=1 SV=2	4838	Caco2P7_diffgpep1.16024.16024.3	controllerType=0 controllerNumber=1 scan=16024	76.0612
17133:3	2	K.KLDFIILN[+1694.603]ETK.F	HexNAc(3)Hex(4)Fuc(1)NeuAc(1)	N[+1695]	1010.13	3	3028.38	3028.38	0	1.2	513	Specific	558.28	421.01	421.01	9.09	112	>sp|P27487|DPP4_HUMAN Dipeptidyl peptidase 4 OS=Homo sapiens GN=DPP4 PE=1 SV=2	4838	Caco2P7_diffgpep1.16196.16196.3	controllerType=0 controllerNumber=1 scan=16196	76.9221
19709:3	2	K.KLDFIILN[+2350.830]ETK.F	HexNAc(4)Hex(5)Fuc(1)NeuAc(2)	N[+2351]	1228.88	3	3684.61	3684.6	0	2.2	513	Specific	568.53	435.62	435.62	9.1	112	>sp|P27487|DPP4_HUMAN Dipeptidyl peptidase 4 OS=Homo sapiens GN=DPP4 PE=1 SV=2	4838	Caco2P7_diffgpep1.18235.18235.3	controllerType=0 controllerNumber=1 scan=18235	86.7688
16734:3	2	K.KLDFIILN[+2059.735]ETK.F	HexNAc(4)Hex(5)Fuc(1)NeuAc(1)	N[+2060]	1131.84	3	3393.52	3393.51	0	2.3	513	Specific	574.96	413.4	413.4	9.1	112	>sp|P27487|DPP4_HUMAN Dipeptidyl peptidase 4 OS=Homo sapiens GN=DPP4 PE=1 SV=2	4838	Caco2P7_diffgpep1.15889.15889.3	controllerType=0 controllerNumber=1 scan=15889	75.3928
16746:3	2	K.KLDFIILN[+2408.872]ETK.F	HexNAc(5)Hex(5)Fuc(2)NeuAc(1)	N[+2409]	1248.22	3	3742.65	3742.64	0	1.8	513	Specific	592.56	403.32	403.32	10.51	112	>sp|P27487|DPP4_HUMAN Dipeptidyl peptidase 4 OS=Homo sapiens GN=DPP4 PE=1 SV=2	4838	Caco2P7_diffgpep1.15897.15897.3	controllerType=0 controllerNumber=1 scan=15897	75.432
16978:3	2	K.KLDFIILN[+1856.656]ETK.F	HexNAc(3)Hex(5)Fuc(1)NeuAc(1)	N[+1857]	1064.15	3	3190.44	3190.43	0	3.7	513	Specific	648.94	417.17	417.17	11.34	112	>sp|P27487|DPP4_HUMAN Dipeptidyl peptidase 4 OS=Homo sapiens GN=DPP4 PE=1 SV=2	4838	Caco2P7_diffgpep1.16075.16075.3	controllerType=0 controllerNumber=1 scan=16075	76.3169
16784:3	2	K.KLDFIILN[+2018.708]ETK.F	HexNAc(3)Hex(6)Fuc(1)NeuAc(1)	N[+2019]	1118.17	3	3352.49	3352.48	0	2.1	513	Specific	700.47	527.56	527.56	13.51	112	>sp|P27487|DPP4_HUMAN Dipeptidyl peptidase 4 OS=Homo sapiens GN=DPP4 PE=1 SV=2	4838	Caco2P7_diffgpep1.15928.15928.3	controllerType=0 controllerNumber=1 scan=15928	75.5866
16988:3	2	K.KLDFIILN[+1856.656]ETK.F	HexNAc(3)Hex(5)Fuc(1)NeuAc(1)	N[+1857]	1064.15	3	3190.44	3190.43	0	3.7	513	Specific	702.57	522.59	522.59	13.34	112	>sp|P27487|DPP4_HUMAN Dipeptidyl peptidase 4 OS=Homo sapiens GN=DPP4 PE=1 SV=2	4838	Caco2P7_diffgpep1.16084.16084.3	controllerType=0 controllerNumber=1 scan=16084	76.361
20736:3	2	K.LDFIILN[+2059.735]ETK.F	HexNAc(4)Hex(5)Fuc(1)NeuAc(1)	N[+2060]	1089.14	3	3265.42	3265.41	0	2.2	514	Specific	224.38	78.79	78.79	3.56	112	>sp|P27487|DPP4_HUMAN Dipeptidyl peptidase 4 OS=Homo sapiens GN=DPP4 PE=1 SV=2	4838	Caco2P7_diffgpep1.19052.19052.3	controllerType=0 controllerNumber=1 scan=19052	90.7245
23955:3	2	K.LDFIILN[+2350.830]ETK.F	HexNAc(4)Hex(5)Fuc(1)NeuAc(2)	N[+2351]	1186.18	3	3556.51	3556.51	0	1.9	514	Specific	245.75	97.17	97.17	4.44	112	>sp|P27487|DPP4_HUMAN Dipeptidyl peptidase 4 OS=Homo sapiens GN=DPP4 PE=1 SV=2	4838	Caco2P7_diffgpep1.21878.21878.3	controllerType=0 controllerNumber=1 scan=21878	103.497
23964:3	2	K.LDFIILN[+2350.830]ETK.F	HexNAc(4)Hex(5)Fuc(1)NeuAc(2)	N[+2351]	1186.18	3	3556.51	3556.51	0	1.7	514	Specific	248.02	131.6	131.6	4.86	112	>sp|P27487|DPP4_HUMAN Dipeptidyl peptidase 4 OS=Homo sapiens GN=DPP4 PE=1 SV=2	4838	Caco2P7_diffgpep1.21891.21891.3	controllerType=0 controllerNumber=1 scan=21891	103.549
20999:3	2	K.LDFIILN[+1872.651]ETK.F	HexNAc(3)Hex(6)Fuc(0)NeuAc(1)	N[+1873]	1026.78	3	3078.33	3078.33	0	1.9	514	Specific	254.58	139.87	139.87	4.22	112	>sp|P27487|DPP4_HUMAN Dipeptidyl peptidase 4 OS=Homo sapiens GN=DPP4 PE=1 SV=2	4838	Caco2P7_diffgpep1.19283.19283.3	controllerType=0 controllerNumber=1 scan=19283	91.7859
20659:3	2	K.LDFIILN[+2262.814]ETK.F	HexNAc(5)Hex(5)Fuc(1)NeuAc(1)	N[+2263]	1156.84	3	3468.5	3468.49	0	2.1	514	Specific	263.98	159.15	159.15	5.39	112	>sp|P27487|DPP4_HUMAN Dipeptidyl peptidase 4 OS=Homo sapiens GN=DPP4 PE=1 SV=2	4838	Caco2P7_diffgpep1.18990.18990.3	controllerType=0 controllerNumber=1 scan=18990	90.4158
23998:3	2	K.LDFIILN[+2553.910]ETK.F	HexNAc(5)Hex(5)Fuc(1)NeuAc(2)	N[+2554]	1253.87	3	3759.59	3759.59	0	1.9	514	Specific	294.24	167.93	167.93	5.46	112	>sp|P27487|DPP4_HUMAN Dipeptidyl peptidase 4 OS=Homo sapiens GN=DPP4 PE=1 SV=2	4838	Caco2P7_diffgpep1.21948.21948.3	controllerType=0 controllerNumber=1 scan=21948	103.781
20739:3	2	K.LDFIILN[+2018.708]ETK.F	HexNAc(3)Hex(6)Fuc(1)NeuAc(1)	N[+2019]	1075.47	3	3224.39	3224.39	0	2.6	514	Specific	302.49	177.2	177.2	5.41	112	>sp|P27487|DPP4_HUMAN Dipeptidyl peptidase 4 OS=Homo sapiens GN=DPP4 PE=1 SV=2	4838	Caco2P7_diffgpep1.19055.19055.3	controllerType=0 controllerNumber=1 scan=19055	90.7408
19361:4	2	R.YMGLPTPEDNLDHYRN[+2554.930]STVMSR.A	HexNAc(5)Hex(5)Fuc(3)NeuAc(1)	N[+2555]	1288.28	4	5150.12	5151.12	-1	-0.5	670	Specific	277.15	228.15	16.37	4.98	112	>sp|P27487|DPP4_HUMAN Dipeptidyl peptidase 4 OS=Homo sapiens GN=DPP4 PE=1 SV=2	4838	Caco2P7_diffgpep1.17923.17923.4	controllerType=0 controllerNumber=1 scan=17923	85.3783
17699:4	2	R.YMGLPTPEDNLDHYRN[+2262.814]STVMSR.A	HexNAc(5)Hex(5)Fuc(1)NeuAc(1)	N[+2263]	1215.51	4	4859.02	4859.01	0	2.2	670	Specific	322.65	152.75	51.32	5.2	112	>sp|P27487|DPP4_HUMAN Dipeptidyl peptidase 4 OS=Homo sapiens GN=DPP4 PE=1 SV=2	4838	Caco2P7_diffgpep1.16633.16633.4	controllerType=0 controllerNumber=1 scan=16633	79.1189
01479:3	2	R.N[+2262.814]STVMSR.A	HexNAc(5)Hex(5)Fuc(1)NeuAc(1)	N[+2263]	1019.74	3	3057.2	3057.2	0	1.8	685	Specific	235.04	69.82	69.82	2.05	112	>sp|P27487|DPP4_HUMAN Dipeptidyl peptidase 4 OS=Homo sapiens GN=DPP4 PE=1 SV=2	4838	Caco2P7_diffgpep1.3016.3016.3	controllerType=0 controllerNumber=1 scan=3016	13.5867
27521:3	3	R.SNLDPSNVDSLFYAAQASQALSGC[+57.021]EISISN[+1378.476]ETK.D	HexNAc(2)Hex(6)Fuc(0)NeuAc(0)	C[+57], N[+1378]	1632.7	3	4896.09	4895.12	1	-6.1	77	Specific	210.99	209.82	209.82	2.36	35	>sp|P04844|RPN2_HUMAN Dolichyl-diphosphooligosaccharide--protein glycosyltransferase subunit 2 OS=Homo sapiens GN=RPN2 PE=1 SV=3	14886	Caco2P7_diffgpep1.26522.26522.3	controllerType=0 controllerNumber=1 scan=26522	122.852
27582:3	3	R.SNLDPSNVDSLFYAAQASQALSGC[+57.021]EISISN[+1216.423]ETK.D	HexNAc(2)Hex(5)Fuc(0)NeuAc(0)	C[+57], N[+1216]	1578.36	3	4733.07	4733.07	0	1	77	Specific	240.46	231.8	231.8	6.02	35	>sp|P04844|RPN2_HUMAN Dolichyl-diphosphooligosaccharide--protein glycosyltransferase subunit 2 OS=Homo sapiens GN=RPN2 PE=1 SV=3	14886	Caco2P7_diffgpep1.26644.26644.3	controllerType=0 controllerNumber=1 scan=26644	123.352
27138:3	3	R.SNLDPSNVDSLFYAAQASQALSGC[+57.021]EISISN[+1378.476]ETK.D	HexNAc(2)Hex(6)Fuc(0)NeuAc(0)	C[+57], N[+1378]	1632.38	3	4895.14	4895.12	0	3.4	77	Specific	285	229.32	229.32	6.27	35	>sp|P04844|RPN2_HUMAN Dolichyl-diphosphooligosaccharide--protein glycosyltransferase subunit 2 OS=Homo sapiens GN=RPN2 PE=1 SV=3	14886	Caco2P7_diffgpep1.25867.25867.3	controllerType=0 controllerNumber=1 scan=25867	120.138
26894:3	3	R.SNLDPSNVDSLFYAAQASQALSGC[+57.021]EISISN[+1702.581]ETK.D	HexNAc(2)Hex(8)Fuc(0)NeuAc(0)	C[+57], N[+1703]	1740.42	3	5219.24	5219.22	0	3.8	77	Specific	293.88	280.91	280.91	6.47	35	>sp|P04844|RPN2_HUMAN Dolichyl-diphosphooligosaccharide--protein glycosyltransferase subunit 2 OS=Homo sapiens GN=RPN2 PE=1 SV=3	14886	Caco2P7_diffgpep1.25585.25585.3	controllerType=0 controllerNumber=1 scan=25585	118.94
26925:3	3	R.SNLDPSNVDSLFYAAQASQALSGC[+57.021]EISISN[+1702.581]ETK.D	HexNAc(2)Hex(8)Fuc(0)NeuAc(0)	C[+57], N[+1703]	1740.42	3	5219.24	5219.22	0	3.8	77	Specific	304.37	251.32	251.32	6.38	35	>sp|P04844|RPN2_HUMAN Dolichyl-diphosphooligosaccharide--protein glycosyltransferase subunit 2 OS=Homo sapiens GN=RPN2 PE=1 SV=3	14886	Caco2P7_diffgpep1.25620.25620.3	controllerType=0 controllerNumber=1 scan=25620	119.091
27575:3	3	R.SNLDPSNVDSLFYAAQASQALSGC[+57.021]EISISN[+1216.423]ETK.D	HexNAc(2)Hex(5)Fuc(0)NeuAc(0)	C[+57], N[+1216]	1578.69	3	4734.06	4733.07	1	-2.7	77	Specific	308.69	264.5	264.5	5.86	35	>sp|P04844|RPN2_HUMAN Dolichyl-diphosphooligosaccharide--protein glycosyltransferase subunit 2 OS=Homo sapiens GN=RPN2 PE=1 SV=3	14886	Caco2P7_diffgpep1.26632.26632.3	controllerType=0 controllerNumber=1 scan=26632	123.305
27527:3	3	R.SNLDPSNVDSLFYAAQASQALSGC[+57.021]EISISN[+1378.476]ETK.D	HexNAc(2)Hex(6)Fuc(0)NeuAc(0)	C[+57], N[+1378]	1632.71	3	4896.11	4895.12	1	-2.3	77	Specific	330.59	269.32	269.32	5.97	35	>sp|P04844|RPN2_HUMAN Dolichyl-diphosphooligosaccharide--protein glycosyltransferase subunit 2 OS=Homo sapiens GN=RPN2 PE=1 SV=3	14886	Caco2P7_diffgpep1.26541.26541.3	controllerType=0 controllerNumber=1 scan=26541	122.936
26969:3	3	R.SNLDPSNVDSLFYAAQASQALSGC[+57.021]EISISN[+1540.529]ETK.D	HexNAc(2)Hex(7)Fuc(0)NeuAc(0)	C[+57], N[+1541]	1686.4	3	5057.18	5057.17	0	0.9	77	Specific	358.57	357.7	357.7	7.01	35	>sp|P04844|RPN2_HUMAN Dolichyl-diphosphooligosaccharide--protein glycosyltransferase subunit 2 OS=Homo sapiens GN=RPN2 PE=1 SV=3	14886	Caco2P7_diffgpep1.25684.25684.3	controllerType=0 controllerNumber=1 scan=25684	119.354
27558:4	3	R.SNLDPSNVDSLFYAAQASQALSGC[+57.021]EISISN[+1378.476]ETK.D	HexNAc(2)Hex(6)Fuc(0)NeuAc(0)	C[+57], N[+1378]	1224.78	4	4896.11	4895.12	1	-3	77	Specific	360.56	302.3	302.3	5.97	35	>sp|P04844|RPN2_HUMAN Dolichyl-diphosphooligosaccharide--protein glycosyltransferase subunit 2 OS=Homo sapiens GN=RPN2 PE=1 SV=3	14886	Caco2P7_diffgpep1.26593.26593.4	controllerType=0 controllerNumber=1 scan=26593	123.143
26959:3	3	R.SNLDPSNVDSLFYAAQASQALSGC[+57.021]EISISN[+1540.529]ETK.D	HexNAc(2)Hex(7)Fuc(0)NeuAc(0)	C[+57], N[+1541]	1686.4	3	5057.2	5057.17	0	5.5	77	Specific	376.23	368.08	368.08	6.85	35	>sp|P04844|RPN2_HUMAN Dolichyl-diphosphooligosaccharide--protein glycosyltransferase subunit 2 OS=Homo sapiens GN=RPN2 PE=1 SV=3	14886	Caco2P7_diffgpep1.25665.25665.3	controllerType=0 controllerNumber=1 scan=25665	119.274
27572:4	3	R.SNLDPSNVDSLFYAAQASQALSGC[+57.021]EISISN[+1216.423]ETK.D	HexNAc(2)Hex(5)Fuc(0)NeuAc(0)	C[+57], N[+1216]	1184.01	4	4733.03	4733.07	0	-6.6	77	Specific	383.63	306.99	306.99	5.54	35	>sp|P04844|RPN2_HUMAN Dolichyl-diphosphooligosaccharide--protein glycosyltransferase subunit 2 OS=Homo sapiens GN=RPN2 PE=1 SV=3	14886	Caco2P7_diffgpep1.26627.26627.4	controllerType=0 controllerNumber=1 scan=26627	123.283
27207:3	3	R.SNLDPSNVDSLFYAAQASQALSGC[+57.021]EISISN[+1054.370]ETK.D	HexNAc(2)Hex(4)Fuc(0)NeuAc(0)	C[+57], N[+1054]	1524.68	3	4572.03	4571.01	1	2.2	77	Specific	386.08	330.87	330.87	7.11	35	>sp|P04844|RPN2_HUMAN Dolichyl-diphosphooligosaccharide--protein glycosyltransferase subunit 2 OS=Homo sapiens GN=RPN2 PE=1 SV=3	14886	Caco2P7_diffgpep1.25974.25974.3	controllerType=0 controllerNumber=1 scan=25974	120.577
27636:4	3	R.SNLDPSNVDSLFYAAQASQALSGC[+57.021]EISISN[+1378.476]ETK.D	HexNAc(2)Hex(6)Fuc(0)NeuAc(0)	C[+57], N[+1378]	1224.79	4	4896.13	4895.12	1	2.4	77	Specific	388.87	324.88	324.88	6.77	35	>sp|P04844|RPN2_HUMAN Dolichyl-diphosphooligosaccharide--protein glycosyltransferase subunit 2 OS=Homo sapiens GN=RPN2 PE=1 SV=3	14886	Caco2P7_diffgpep1.26740.26740.4	controllerType=0 controllerNumber=1 scan=26740	123.746
27208:4	3	R.SNLDPSNVDSLFYAAQASQALSGC[+57.021]EISISN[+2571.946]ETK.D	HexNAc(5)Hex(6)Fuc(4)NeuAc(0)	C[+57], N[+2572]	1523.15	4	6089.59	6088.59	1	0.2	77	Specific	396.07	336.1	336.1	6.79	35	>sp|P04844|RPN2_HUMAN Dolichyl-diphosphooligosaccharide--protein glycosyltransferase subunit 2 OS=Homo sapiens GN=RPN2 PE=1 SV=3	14886	Caco2P7_diffgpep1.25974.25974.3	controllerType=0 controllerNumber=1 scan=25974	120.577
27202:4	3	R.SNLDPSNVDSLFYAAQASQALSGC[+57.021]EISISN[+1054.370]ETK.D	HexNAc(2)Hex(4)Fuc(0)NeuAc(0)	C[+57], N[+1054]	1143.76	4	4572.04	4571.01	1	4.2	77	Specific	424.68	314.99	314.99	6.8	35	>sp|P04844|RPN2_HUMAN Dolichyl-diphosphooligosaccharide--protein glycosyltransferase subunit 2 OS=Homo sapiens GN=RPN2 PE=1 SV=3	14886	Caco2P7_diffgpep1.25963.25963.4	controllerType=0 controllerNumber=1 scan=25963	120.533
26893:4	3	R.SNLDPSNVDSLFYAAQASQALSGC[+57.021]EISISN[+1864.634]ETK.D	HexNAc(2)Hex(9)Fuc(0)NeuAc(0)	C[+57], N[+1865]	1346.08	4	5381.29	5381.28	0	1.8	77	Specific	433.8	362.38	362.38	7.44	35	>sp|P04844|RPN2_HUMAN Dolichyl-diphosphooligosaccharide--protein glycosyltransferase subunit 2 OS=Homo sapiens GN=RPN2 PE=1 SV=3	14886	Caco2P7_diffgpep1.25583.25583.4	controllerType=0 controllerNumber=1 scan=25583	118.933
27123:3	3	R.SNLDPSNVDSLFYAAQASQALSGC[+57.021]EISISN[+1378.476]ETK.D	HexNAc(2)Hex(6)Fuc(0)NeuAc(0)	C[+57], N[+1378]	1632.39	3	4895.14	4895.12	0	4.8	77	Specific	459.89	401.85	401.85	8.67	35	>sp|P04844|RPN2_HUMAN Dolichyl-diphosphooligosaccharide--protein glycosyltransferase subunit 2 OS=Homo sapiens GN=RPN2 PE=1 SV=3	14886	Caco2P7_diffgpep1.25850.25850.3	controllerType=0 controllerNumber=1 scan=25850	120.061
27031:4	3	R.SNLDPSNVDSLFYAAQASQALSGC[+57.021]EISISN[+1540.529]ETK.D	HexNAc(2)Hex(7)Fuc(0)NeuAc(0)	C[+57], N[+1541]	1264.79	4	5056.16	5057.17	-1	-2.5	77	Specific	473.05	312.07	312.07	6.29	35	>sp|P04844|RPN2_HUMAN Dolichyl-diphosphooligosaccharide--protein glycosyltransferase subunit 2 OS=Homo sapiens GN=RPN2 PE=1 SV=3	14886	Caco2P7_diffgpep1.25764.25764.4	controllerType=0 controllerNumber=1 scan=25764	119.682
26867:4	3	R.SNLDPSNVDSLFYAAQASQALSGC[+57.021]EISISN[+1864.634]ETK.D	HexNAc(2)Hex(9)Fuc(0)NeuAc(0)	C[+57], N[+1865]	1346.08	4	5381.29	5381.28	0	2.1	77	Specific	512.91	406.91	406.91	9.08	35	>sp|P04844|RPN2_HUMAN Dolichyl-diphosphooligosaccharide--protein glycosyltransferase subunit 2 OS=Homo sapiens GN=RPN2 PE=1 SV=3	14886	Caco2P7_diffgpep1.25528.25528.4	controllerType=0 controllerNumber=1 scan=25528	118.71
27177:4	3	R.SNLDPSNVDSLFYAAQASQALSGC[+57.021]EISISN[+1054.370]ETK.D	HexNAc(2)Hex(4)Fuc(0)NeuAc(0)	C[+57], N[+1054]	1143.77	4	4572.05	4571.01	1	7.5	77	Specific	537.71	452.9	452.9	8.48	35	>sp|P04844|RPN2_HUMAN Dolichyl-diphosphooligosaccharide--protein glycosyltransferase subunit 2 OS=Homo sapiens GN=RPN2 PE=1 SV=3	14886	Caco2P7_diffgpep1.25931.25931.4	controllerType=0 controllerNumber=1 scan=25931	120.403
27064:3	3	R.SNLDPSNVDSLFYAAQASQALSGC[+57.021]EISISN[+1216.423]ETK.D	HexNAc(2)Hex(5)Fuc(0)NeuAc(0)	C[+57], N[+1216]	1578.36	3	4733.08	4733.07	0	2.2	77	Specific	571.83	502.01	502.01	9.7	35	>sp|P04844|RPN2_HUMAN Dolichyl-diphosphooligosaccharide--protein glycosyltransferase subunit 2 OS=Homo sapiens GN=RPN2 PE=1 SV=3	14886	Caco2P7_diffgpep1.25792.25792.3	controllerType=0 controllerNumber=1 scan=25792	119.811
27520:4	3	R.SNLDPSNVDSLFYAAQASQALSGC[+57.021]EISISN[+1378.476]ETK.D	HexNAc(2)Hex(6)Fuc(0)NeuAc(0)	C[+57], N[+1378]	1224.79	4	4896.12	4895.12	1	-0.1	77	Specific	587.74	481.32	481.32	10.39	35	>sp|P04844|RPN2_HUMAN Dolichyl-diphosphooligosaccharide--protein glycosyltransferase subunit 2 OS=Homo sapiens GN=RPN2 PE=1 SV=3	14886	Caco2P7_diffgpep1.26518.26518.4	controllerType=0 controllerNumber=1 scan=26518	122.836
26877:4	3	R.SNLDPSNVDSLFYAAQASQALSGC[+57.021]EISISN[+1702.581]ETK.D	HexNAc(2)Hex(8)Fuc(0)NeuAc(0)	C[+57], N[+1703]	1305.31	4	5218.22	5219.22	-1	-0.5	77	Specific	596.85	474.03	474.03	10.38	35	>sp|P04844|RPN2_HUMAN Dolichyl-diphosphooligosaccharide--protein glycosyltransferase subunit 2 OS=Homo sapiens GN=RPN2 PE=1 SV=3	14886	Caco2P7_diffgpep1.25551.25551.4	controllerType=0 controllerNumber=1 scan=25551	118.8
27183:4	3	R.SNLDPSNVDSLFYAAQASQALSGC[+57.021]EISISN[+1216.423]ETK.D	HexNAc(2)Hex(5)Fuc(0)NeuAc(0)	C[+57], N[+1216]	1184.03	4	4733.08	4733.07	0	2.7	77	Specific	645.99	555.15	555.15	11.64	35	>sp|P04844|RPN2_HUMAN Dolichyl-diphosphooligosaccharide--protein glycosyltransferase subunit 2 OS=Homo sapiens GN=RPN2 PE=1 SV=3	14886	Caco2P7_diffgpep1.25938.25938.4	controllerType=0 controllerNumber=1 scan=25938	120.43
26989:3	3	R.SNLDPSNVDSLFYAAQASQALSGC[+57.021]EISISN[+1378.476]ETK.D	HexNAc(2)Hex(6)Fuc(0)NeuAc(0)	C[+57], N[+1378]	1632.38	3	4895.14	4895.12	0	4.3	77	Specific	704.04	589.42	589.42	13.52	35	>sp|P04844|RPN2_HUMAN Dolichyl-diphosphooligosaccharide--protein glycosyltransferase subunit 2 OS=Homo sapiens GN=RPN2 PE=1 SV=3	14886	Caco2P7_diffgpep1.25711.25711.3	controllerType=0 controllerNumber=1 scan=25711	119.464
26929:4	3	R.SNLDPSNVDSLFYAAQASQALSGC[+57.021]EISISN[+1540.529]ETK.D	HexNAc(2)Hex(7)Fuc(0)NeuAc(0)	C[+57], N[+1541]	1265.05	4	5057.19	5057.17	0	4.1	77	Specific	735.71	590.66	590.66	13.61	35	>sp|P04844|RPN2_HUMAN Dolichyl-diphosphooligosaccharide--protein glycosyltransferase subunit 2 OS=Homo sapiens GN=RPN2 PE=1 SV=3	14886	Caco2P7_diffgpep1.25625.25625.4	controllerType=0 controllerNumber=1 scan=25625	119.111
26885:4	3	R.SNLDPSNVDSLFYAAQASQALSGC[+57.021]EISISN[+1702.581]ETK.D	HexNAc(2)Hex(8)Fuc(0)NeuAc(0)	C[+57], N[+1703]	1305.31	4	5218.23	5219.22	-1	1.7	77	Specific	745.25	633.25	633.25	13.76	35	>sp|P04844|RPN2_HUMAN Dolichyl-diphosphooligosaccharide--protein glycosyltransferase subunit 2 OS=Homo sapiens GN=RPN2 PE=1 SV=3	14886	Caco2P7_diffgpep1.25564.25564.4	controllerType=0 controllerNumber=1 scan=25564	118.851
27081:3	3	R.SNLDPSNVDSLFYAAQASQALSGC[+57.021]EISISN[+1216.423]ETK.D	HexNAc(2)Hex(5)Fuc(0)NeuAc(0)	C[+57], N[+1216]	1578.37	3	4733.09	4733.07	0	4.7	77	Specific	770.62	656.78	656.78	14.52	35	>sp|P04844|RPN2_HUMAN Dolichyl-diphosphooligosaccharide--protein glycosyltransferase subunit 2 OS=Homo sapiens GN=RPN2 PE=1 SV=3	14886	Caco2P7_diffgpep1.25808.25808.3	controllerType=0 controllerNumber=1 scan=25808	119.879
27118:4	3	R.SNLDPSNVDSLFYAAQASQALSGC[+57.021]EISISN[+1378.476]ETK.D	HexNAc(2)Hex(6)Fuc(0)NeuAc(0)	C[+57], N[+1378]	1224.54	4	4895.14	4895.12	0	3.8	77	Specific	873.08	630.94	630.94	16.61	35	>sp|P04844|RPN2_HUMAN Dolichyl-diphosphooligosaccharide--protein glycosyltransferase subunit 2 OS=Homo sapiens GN=RPN2 PE=1 SV=3	14886	Caco2P7_diffgpep1.25844.25844.4	controllerType=0 controllerNumber=1 scan=25844	120.04
26946:4	3	R.SNLDPSNVDSLFYAAQASQALSGC[+57.021]EISISN[+1540.529]ETK.D	HexNAc(2)Hex(7)Fuc(0)NeuAc(0)	C[+57], N[+1541]	1265.05	4	5057.19	5057.17	0	3	77	Specific	897.11	762.53	762.53	16.64	35	>sp|P04844|RPN2_HUMAN Dolichyl-diphosphooligosaccharide--protein glycosyltransferase subunit 2 OS=Homo sapiens GN=RPN2 PE=1 SV=3	14886	Caco2P7_diffgpep1.25649.25649.4	controllerType=0 controllerNumber=1 scan=25649	119.21
27065:4	3	R.SNLDPSNVDSLFYAAQASQALSGC[+57.021]EISISN[+1216.423]ETK.D	HexNAc(2)Hex(5)Fuc(0)NeuAc(0)	C[+57], N[+1216]	1184.03	4	4733.08	4733.07	0	2.7	77	Specific	957.71	729.16	729.16	18.64	35	>sp|P04844|RPN2_HUMAN Dolichyl-diphosphooligosaccharide--protein glycosyltransferase subunit 2 OS=Homo sapiens GN=RPN2 PE=1 SV=3	14886	Caco2P7_diffgpep1.25794.25794.4	controllerType=0 controllerNumber=1 scan=25794	119.818
26977:4	3	R.SNLDPSNVDSLFYAAQASQALSGC[+57.021]EISISN[+1378.476]ETK.D	HexNAc(2)Hex(6)Fuc(0)NeuAc(0)	C[+57], N[+1378]	1224.54	4	4895.14	4895.12	0	3.5	77	Specific	962.78	687.28	687.28	18.61	35	>sp|P04844|RPN2_HUMAN Dolichyl-diphosphooligosaccharide--protein glycosyltransferase subunit 2 OS=Homo sapiens GN=RPN2 PE=1 SV=3	14886	Caco2P7_diffgpep1.25693.25693.4	controllerType=0 controllerNumber=1 scan=25693	119.392
29384:4	4	K.DIFEVEENTN[+2262.814]VTEPLVDIHVPEGQEVTLGALSTPFAFR.I	HexNAc(5)Hex(5)Fuc(1)NeuAc(1)	N[+2263]	1619.74	4	6475.94	6475.91	0	4.1	35	Specific	350.33	280.29	23.47	7	57	>sp|Q9HBB8|CDHR5_HUMAN Cadherin-related family member 5 OS=Homo sapiens GN=CDHR5 PE=1 SV=3	2656	Caco2P7_diffgpep1.31730.31730.4	controllerType=0 controllerNumber=1 scan=31730	144.662
29377:5	4	K.DIFEVEENTN[+2262.814]VTEPLVDIHVPEGQEVTLGALSTPFAFR.I	HexNAc(5)Hex(5)Fuc(1)NeuAc(1)	N[+2263]	1295.79	5	6474.93	6475.91	-1	2.9	35	Specific	549.43	446.84	446.84	9.56	57	>sp|Q9HBB8|CDHR5_HUMAN Cadherin-related family member 5 OS=Homo sapiens GN=CDHR5 PE=1 SV=3	2656	Caco2P7_diffgpep1.31709.31709.5	controllerType=0 controllerNumber=1 scan=31709	144.574
17652:4	4	R.IQGNQLFLN[+2538.935]VTPDYEEK.S	HexNAc(5)Hex(4)Fuc(4)NeuAc(1)	N[+2539]	1137.74	4	4547.94	4546.94	1	0	73	Specific	136.56	117.94	23.74	2.32	57	>sp|Q9HBB8|CDHR5_HUMAN Cadherin-related family member 5 OS=Homo sapiens GN=CDHR5 PE=1 SV=3	2656	Caco2P7_diffgpep1.16598.16598.4	controllerType=0 controllerNumber=1 scan=16598	78.9464
17036:4	4	R.IQGNQLFLN[+3211.158]VTPDYEEK.S	HexNAc(6)Hex(6)Fuc(3)NeuAc(2)	N[+3211]	1305.81	4	5220.21	5219.16	1	9.3	73	Specific	141.33	141.33	141.33	2.33	57	>sp|Q9HBB8|CDHR5_HUMAN Cadherin-related family member 5 OS=Homo sapiens GN=CDHR5 PE=1 SV=3	2656	Caco2P7_diffgpep1.16122.16122.4	controllerType=0 controllerNumber=1 scan=16122	76.5517
17216:4	4	R.IQGNQLFLN[+2700.988]VTPDYEEK.S	HexNAc(5)Hex(5)Fuc(4)NeuAc(1)	N[+2701]	1178.26	4	4710	4708.99	1	2.2	73	Specific	146.75	104.84	14.37	2.04	57	>sp|Q9HBB8|CDHR5_HUMAN Cadherin-related family member 5 OS=Homo sapiens GN=CDHR5 PE=1 SV=3	2656	Caco2P7_diffgpep1.16260.16260.4	controllerType=0 controllerNumber=1 scan=16260	77.2421
19628:4	4	R.IQGNQLFLN[+3210.137]VTPDYEEK.S	HexNAc(6)Hex(6)Fuc(1)NeuAc(3)	N[+3210]	1305.53	4	5219.09	5218.14	1	-10	73	Specific	147.92	123	123	2	57	>sp|Q9HBB8|CDHR5_HUMAN Cadherin-related family member 5 OS=Homo sapiens GN=CDHR5 PE=1 SV=3	2656	Caco2P7_diffgpep1.18164.18164.4	controllerType=0 controllerNumber=1 scan=18164	86.4364
17542:4	4	R.IQGNQLFLN[+2684.968]VTPDYEEK.S	HexNAc(7)Hex(6)Fuc(0)NeuAc(1)	N[+2685]	1174.25	4	4693.97	4692.97	1	0.3	73	Specific	160.46	112.16	45.13	2.41	57	>sp|Q9HBB8|CDHR5_HUMAN Cadherin-related family member 5 OS=Homo sapiens GN=CDHR5 PE=1 SV=3	2656	Caco2P7_diffgpep1.16516.16516.4	controllerType=0 controllerNumber=1 scan=16516	78.5341
19999:4	4	R.IQGNQLFLN[+2847.021]VTPDYEEK.S	HexNAc(7)Hex(7)Fuc(0)NeuAc(1)	N[+2847]	1214.51	4	4855.03	4855.02	0	1.6	73	Specific	170.36	125.04	36.52	3.08	57	>sp|Q9HBB8|CDHR5_HUMAN Cadherin-related family member 5 OS=Homo sapiens GN=CDHR5 PE=1 SV=3	2656	Caco2P7_diffgpep1.18469.18469.4	controllerType=0 controllerNumber=1 scan=18469	87.87
17108:4	4	R.IQGNQLFLN[+3066.120]VTPDYEEK.S	HexNAc(6)Hex(6)Fuc(4)NeuAc(1)	N[+3066]	1269.54	4	5075.13	5074.12	1	1.1	73	Specific	184.29	170.93	170.93	3.99	57	>sp|Q9HBB8|CDHR5_HUMAN Cadherin-related family member 5 OS=Homo sapiens GN=CDHR5 PE=1 SV=3	2656	Caco2P7_diffgpep1.16177.16177.4	controllerType=0 controllerNumber=1 scan=16177	76.8267
20003:4	4	R.IQGNQLFLN[+2847.021]VTPDYEEK.S	HexNAc(7)Hex(7)Fuc(0)NeuAc(1)	N[+2847]	1214.26	4	4854.03	4855.02	-1	3	73	Specific	188.56	125.85	125.85	2.6	57	>sp|Q9HBB8|CDHR5_HUMAN Cadherin-related family member 5 OS=Homo sapiens GN=CDHR5 PE=1 SV=3	2656	Caco2P7_diffgpep1.18472.18472.4	controllerType=0 controllerNumber=1 scan=18472	87.8825
17090:4	4	R.IQGNQLFLN[+3066.120]VTPDYEEK.S	HexNAc(6)Hex(6)Fuc(4)NeuAc(1)	N[+3066]	1269.55	4	5075.16	5074.12	1	7.3	73	Specific	203.41	179.29	179.29	2.4	57	>sp|Q9HBB8|CDHR5_HUMAN Cadherin-related family member 5 OS=Homo sapiens GN=CDHR5 PE=1 SV=3	2656	Caco2P7_diffgpep1.16161.16161.4	controllerType=0 controllerNumber=1 scan=16161	76.7477
20021:4	4	R.IQGNQLFLN[+3140.157]VTPDYEEK.S	HexNAc(7)Hex(7)Fuc(4)NeuAc(0)	N[+3140]	1288.04	4	5149.12	5148.16	1	-8	73	Specific	208.56	180.09	180.09	2.05	57	>sp|Q9HBB8|CDHR5_HUMAN Cadherin-related family member 5 OS=Homo sapiens GN=CDHR5 PE=1 SV=3	2656	Caco2P7_diffgpep1.18484.18484.4	controllerType=0 controllerNumber=1 scan=18484	87.9437
17420:4	4	R.IQGNQLFLN[+2993.079]VTPDYEEK.S	HexNAc(7)Hex(7)Fuc(1)NeuAc(1)	N[+2993]	1251.28	4	5002.11	5001.08	1	5.1	73	Specific	218.48	189.85	13.1	3.26	57	>sp|Q9HBB8|CDHR5_HUMAN Cadherin-related family member 5 OS=Homo sapiens GN=CDHR5 PE=1 SV=3	2656	Caco2P7_diffgpep1.16424.16424.4	controllerType=0 controllerNumber=1 scan=16424	78.0711
20178:4	4	R.IQGNQLFLN[+2847.021]VTPDYEEK.S	HexNAc(7)Hex(7)Fuc(0)NeuAc(1)	N[+2847]	1214.52	4	4855.04	4855.02	0	4.2	73	Specific	223.3	188.9	10.08	5.47	57	>sp|Q9HBB8|CDHR5_HUMAN Cadherin-related family member 5 OS=Homo sapiens GN=CDHR5 PE=1 SV=3	2656	Caco2P7_diffgpep1.18615.18615.4	controllerType=0 controllerNumber=1 scan=18615	88.5728
20444:3	4	R.IQGNQLFLN[+2262.814]VTPDYEEK.S	HexNAc(5)Hex(5)Fuc(1)NeuAc(1)	N[+2263]	1423.95	3	4269.84	4270.82	-1	6.3	73	Specific	231.41	119.36	119.36	3.26	57	>sp|Q9HBB8|CDHR5_HUMAN Cadherin-related family member 5 OS=Homo sapiens GN=CDHR5 PE=1 SV=3	2656	Caco2P7_diffgpep1.18818.18818.3	controllerType=0 controllerNumber=1 scan=18818	89.5775
20761:3	4	R.IQGNQLFLN[+2116.756]VTPDYEEK.S	HexNAc(5)Hex(5)Fuc(0)NeuAc(1)	N[+2117]	1375.25	3	4123.75	4124.76	-1	-2.3	73	Specific	251.16	190.1	190.1	5.27	57	>sp|Q9HBB8|CDHR5_HUMAN Cadherin-related family member 5 OS=Homo sapiens GN=CDHR5 PE=1 SV=3	2656	Caco2P7_diffgpep1.19073.19073.3	controllerType=0 controllerNumber=1 scan=19073	90.8307
19981:4	4	R.IQGNQLFLN[+3139.137]VTPDYEEK.S	HexNAc(7)Hex(7)Fuc(2)NeuAc(1)	N[+3139]	1287.55	4	5147.18	5147.14	0	7.3	73	Specific	254.77	211.82	20.31	5.17	57	>sp|Q9HBB8|CDHR5_HUMAN Cadherin-related family member 5 OS=Homo sapiens GN=CDHR5 PE=1 SV=3	2656	Caco2P7_diffgpep1.18456.18456.4	controllerType=0 controllerNumber=1 scan=18456	87.8072
19795:4	4	R.IQGNQLFLN[+3139.137]VTPDYEEK.S	HexNAc(7)Hex(7)Fuc(2)NeuAc(1)	N[+3139]	1287.55	4	5147.16	5147.14	0	4.7	73	Specific	258.67	200.64	21.13	5.36	57	>sp|Q9HBB8|CDHR5_HUMAN Cadherin-related family member 5 OS=Homo sapiens GN=CDHR5 PE=1 SV=3	2656	Caco2P7_diffgpep1.18301.18301.4	controllerType=0 controllerNumber=1 scan=18301	87.0788
20670:4	4	R.IQGNQLFLN[+2116.756]VTPDYEEK.S	HexNAc(5)Hex(5)Fuc(0)NeuAc(1)	N[+2117]	1031.95	4	4124.77	4124.76	0	3	73	Specific	288.11	238.61	28.69	6.07	57	>sp|Q9HBB8|CDHR5_HUMAN Cadherin-related family member 5 OS=Homo sapiens GN=CDHR5 PE=1 SV=3	2656	Caco2P7_diffgpep1.18999.18999.4	controllerType=0 controllerNumber=1 scan=18999	90.4607
17893:3	4	R.IQGNQLFLN[+2028.740]VTPDYEEK.S	HexNAc(6)Hex(5)Fuc(0)NeuAc(0)	N[+2029]	1346.26	3	4036.76	4036.74	0	4.2	73	Specific	311.13	241.49	241.49	6.35	57	>sp|Q9HBB8|CDHR5_HUMAN Cadherin-related family member 5 OS=Homo sapiens GN=CDHR5 PE=1 SV=3	2656	Caco2P7_diffgpep1.16781.16781.3	controllerType=0 controllerNumber=1 scan=16781	79.8607
17445:4	4	R.IQGNQLFLN[+2700.988]VTPDYEEK.S	HexNAc(5)Hex(5)Fuc(4)NeuAc(1)	N[+2701]	1178.25	4	4709.99	4708.99	1	0.3	73	Specific	379.02	328.12	22.3	6.75	57	>sp|Q9HBB8|CDHR5_HUMAN Cadherin-related family member 5 OS=Homo sapiens GN=CDHR5 PE=1 SV=3	2656	Caco2P7_diffgpep1.16443.16443.4	controllerType=0 controllerNumber=1 scan=16443	78.1669
18085:3	4	R.IQGNQLFLN[+1809.666]VTPDYEEK.S	HexNAc(5)Hex(4)Fuc(1)NeuAc(0)	N[+1810]	1273.23	3	3817.67	3817.67	0	-0.5	73	Specific	392.45	306.95	306.95	6.55	57	>sp|Q9HBB8|CDHR5_HUMAN Cadherin-related family member 5 OS=Homo sapiens GN=CDHR5 PE=1 SV=3	2656	Caco2P7_diffgpep1.16922.16922.3	controllerType=0 controllerNumber=1 scan=16922	80.5444
18282:3	4	R.IQGNQLFLN[+1825.661]VTPDYEEK.S	HexNAc(5)Hex(5)Fuc(0)NeuAc(0)	N[+1826]	1278.56	3	3833.66	3833.66	0	-1	73	Specific	423.54	308.77	308.77	6.46	57	>sp|Q9HBB8|CDHR5_HUMAN Cadherin-related family member 5 OS=Homo sapiens GN=CDHR5 PE=1 SV=3	2656	Caco2P7_diffgpep1.17075.17075.3	controllerType=0 controllerNumber=1 scan=17075	81.2778
20662:3	4	R.IQGNQLFLN[+2116.756]VTPDYEEK.S	HexNAc(5)Hex(5)Fuc(0)NeuAc(1)	N[+2117]	1375.6	3	4124.78	4124.76	0	4.5	73	Specific	428.94	331.32	16.59	6.83	57	>sp|Q9HBB8|CDHR5_HUMAN Cadherin-related family member 5 OS=Homo sapiens GN=CDHR5 PE=1 SV=3	2656	Caco2P7_diffgpep1.18992.18992.3	controllerType=0 controllerNumber=1 scan=18992	90.4266
18126:3	4	R.IQGNQLFLN[+1809.666]VTPDYEEK.S	HexNAc(5)Hex(4)Fuc(1)NeuAc(0)	N[+1810]	1273.23	3	3817.68	3817.67	0	3.8	73	Specific	452.97	369.21	369.21	7.54	57	>sp|Q9HBB8|CDHR5_HUMAN Cadherin-related family member 5 OS=Homo sapiens GN=CDHR5 PE=1 SV=3	2656	Caco2P7_diffgpep1.16951.16951.3	controllerType=0 controllerNumber=1 scan=16951	80.6824
18015:3	4	R.IQGNQLFLN[+2026.687]VTPDYEEK.S	HexNAc(2)Hex(10)Fuc(0)NeuAc(0)	N[+2027]	1345.57	3	4034.69	4034.69	0	0.6	73	Specific	468.01	331.57	331.57	7.26	57	>sp|Q9HBB8|CDHR5_HUMAN Cadherin-related family member 5 OS=Homo sapiens GN=CDHR5 PE=1 SV=3	2656	Caco2P7_diffgpep1.16872.16872.3	controllerType=0 controllerNumber=1 scan=16872	80.3038
18199:3	4	R.IQGNQLFLN[+1825.661]VTPDYEEK.S	HexNAc(5)Hex(5)Fuc(0)NeuAc(0)	N[+1826]	1278.55	3	3833.65	3833.66	0	-3.7	73	Specific	491.83	390.69	390.69	8.4	57	>sp|Q9HBB8|CDHR5_HUMAN Cadherin-related family member 5 OS=Homo sapiens GN=CDHR5 PE=1 SV=3	2656	Caco2P7_diffgpep1.17014.17014.3	controllerType=0 controllerNumber=1 scan=17014	80.9778
18280:3	4	R.IQGNQLFLN[+1663.608]VTPDYEEK.S	HexNAc(5)Hex(4)Fuc(0)NeuAc(0)	N[+1664]	1224.55	3	3671.62	3671.61	0	3.9	73	Specific	493.55	393.05	393.05	9.02	57	>sp|Q9HBB8|CDHR5_HUMAN Cadherin-related family member 5 OS=Homo sapiens GN=CDHR5 PE=1 SV=3	2656	Caco2P7_diffgpep1.17074.17074.3	controllerType=0 controllerNumber=1 scan=17074	81.2723
18062:3	4	R.IQGNQLFLN[+2026.687]VTPDYEEK.S	HexNAc(2)Hex(10)Fuc(0)NeuAc(0)	N[+2027]	1345.57	3	4034.7	4034.69	0	1.5	73	Specific	494.83	356.96	356.96	7.6	57	>sp|Q9HBB8|CDHR5_HUMAN Cadherin-related family member 5 OS=Homo sapiens GN=CDHR5 PE=1 SV=3	2656	Caco2P7_diffgpep1.16908.16908.3	controllerType=0 controllerNumber=1 scan=16908	80.4761
18040:3	4	R.IQGNQLFLN[+2026.687]VTPDYEEK.S	HexNAc(2)Hex(10)Fuc(0)NeuAc(0)	N[+2027]	1345.56	3	4034.67	4034.69	0	-3.5	73	Specific	522.34	356.72	356.72	7	57	>sp|Q9HBB8|CDHR5_HUMAN Cadherin-related family member 5 OS=Homo sapiens GN=CDHR5 PE=1 SV=3	2656	Caco2P7_diffgpep1.16890.16890.3	controllerType=0 controllerNumber=1 scan=16890	80.39
18290:3	4	R.IQGNQLFLN[+1663.608]VTPDYEEK.S	HexNAc(5)Hex(4)Fuc(0)NeuAc(0)	N[+1664]	1224.54	3	3671.62	3671.61	0	1.5	73	Specific	621.2	506.43	506.43	11.95	57	>sp|Q9HBB8|CDHR5_HUMAN Cadherin-related family member 5 OS=Homo sapiens GN=CDHR5 PE=1 SV=3	2656	Caco2P7_diffgpep1.17083.17083.3	controllerType=0 controllerNumber=1 scan=17083	81.3172
18144:3	4	R.IQGNQLFLN[+1702.581]VTPDYEEK.S	HexNAc(2)Hex(8)Fuc(0)NeuAc(0)	N[+1703]	1237.54	3	3710.59	3710.58	0	2.6	73	Specific	686.16	640.17	640.17	12.81	57	>sp|Q9HBB8|CDHR5_HUMAN Cadherin-related family member 5 OS=Homo sapiens GN=CDHR5 PE=1 SV=3	2656	Caco2P7_diffgpep1.16967.16967.3	controllerType=0 controllerNumber=1 scan=16967	80.7574
18061:3	4	R.IQGNQLFLN[+1864.634]VTPDYEEK.S	HexNAc(2)Hex(9)Fuc(0)NeuAc(0)	N[+1865]	1291.55	3	3872.64	3872.64	0	2.2	73	Specific	749.9	644.76	644.76	13.81	57	>sp|Q9HBB8|CDHR5_HUMAN Cadherin-related family member 5 OS=Homo sapiens GN=CDHR5 PE=1 SV=3	2656	Caco2P7_diffgpep1.16907.16907.3	controllerType=0 controllerNumber=1 scan=16907	80.4704
13231:4	4	R.VEEDTKVN[+2424.867]STVIPETQLQAEDR.D	HexNAc(5)Hex(6)Fuc(1)NeuAc(1)	N[+2425]	1232.28	4	4926.11	4926.1	0	2.2	133	Specific	315.28	149.96	25.12	5.52	57	>sp|Q9HBB8|CDHR5_HUMAN Cadherin-related family member 5 OS=Homo sapiens GN=CDHR5 PE=1 SV=3	2656	Caco2P7_diffgpep1.13063.13063.4	controllerType=0 controllerNumber=1 scan=13063	61.5317
11850:3	4	R.VEEDTKVN[+1971.719]STVIPETQLQAEDR.D	HexNAc(5)Hex(5)Fuc(1)NeuAc(0)	N[+1972]	1491.66	3	4472.96	4472.96	0	0.5	133	Specific	330.64	214.84	214.84	6.13	57	>sp|Q9HBB8|CDHR5_HUMAN Cadherin-related family member 5 OS=Homo sapiens GN=CDHR5 PE=1 SV=3	2656	Caco2P7_diffgpep1.11892.11892.3	controllerType=0 controllerNumber=1 scan=11892	55.9622
13421:4	4	R.VEEDTKVN[+2262.814]STVIPETQLQAEDR.D	HexNAc(5)Hex(5)Fuc(1)NeuAc(1)	N[+2263]	1191.77	4	4764.05	4764.05	0	0.4	133	Specific	358.23	216.57	34.64	5.86	57	>sp|Q9HBB8|CDHR5_HUMAN Cadherin-related family member 5 OS=Homo sapiens GN=CDHR5 PE=1 SV=3	2656	Caco2P7_diffgpep1.13209.13209.4	controllerType=0 controllerNumber=1 scan=13209	62.2709
13290:4	4	R.VEEDTKVN[+2059.735]STVIPETQLQAEDR.D	HexNAc(4)Hex(5)Fuc(1)NeuAc(1)	N[+2060]	1141	4	4560.99	4560.97	0	4.3	133	Specific	367.76	339.97	14.13	6.1	57	>sp|Q9HBB8|CDHR5_HUMAN Cadherin-related family member 5 OS=Homo sapiens GN=CDHR5 PE=1 SV=3	2656	Caco2P7_diffgpep1.13109.13109.4	controllerType=0 controllerNumber=1 scan=13109	61.7612
11827:3	4	R.VEEDTKVN[+1971.719]STVIPETQLQAEDR.D	HexNAc(5)Hex(5)Fuc(1)NeuAc(0)	N[+1972]	1491.66	3	4472.97	4472.96	0	2.8	133	Specific	381.03	280.53	280.53	6.48	57	>sp|Q9HBB8|CDHR5_HUMAN Cadherin-related family member 5 OS=Homo sapiens GN=CDHR5 PE=1 SV=3	2656	Caco2P7_diffgpep1.11867.11867.3	controllerType=0 controllerNumber=1 scan=11867	55.8541
13248:4	4	R.VEEDTKVN[+2424.867]STVIPETQLQAEDR.D	HexNAc(5)Hex(6)Fuc(1)NeuAc(1)	N[+2425]	1232.29	4	4926.13	4926.1	0	5.3	133	Specific	383.54	256.19	17.85	5.61	57	>sp|Q9HBB8|CDHR5_HUMAN Cadherin-related family member 5 OS=Homo sapiens GN=CDHR5 PE=1 SV=3	2656	Caco2P7_diffgpep1.13077.13077.4	controllerType=0 controllerNumber=1 scan=13077	61.5992
14895:4	4	R.VEEDTKVN[+2350.830]STVIPETQLQAEDR.D	HexNAc(4)Hex(5)Fuc(1)NeuAc(2)	N[+2351]	1213.53	4	4851.08	4852.07	-1	3.4	133	Specific	404	295.34	295.34	6.36	57	>sp|Q9HBB8|CDHR5_HUMAN Cadherin-related family member 5 OS=Homo sapiens GN=CDHR5 PE=1 SV=3	2656	Caco2P7_diffgpep1.14425.14425.4	controllerType=0 controllerNumber=1 scan=14425	68.2551
13273:3	4	R.VEEDTKVN[+2262.814]STVIPETQLQAEDR.D	HexNAc(5)Hex(5)Fuc(1)NeuAc(1)	N[+2263]	1588.69	3	4764.06	4764.05	0	2.1	133	Specific	412.3	256.11	30.16	6.61	57	>sp|Q9HBB8|CDHR5_HUMAN Cadherin-related family member 5 OS=Homo sapiens GN=CDHR5 PE=1 SV=3	2656	Caco2P7_diffgpep1.13097.13097.3	controllerType=0 controllerNumber=1 scan=13097	61.6999
13214:4	4	R.VEEDTKVN[+2408.872]STVIPETQLQAEDR.D	HexNAc(5)Hex(5)Fuc(2)NeuAc(1)	N[+2409]	1228.04	4	4909.12	4910.11	-1	2.9	133	Specific	417.14	231.87	23.78	6.2	57	>sp|Q9HBB8|CDHR5_HUMAN Cadherin-related family member 5 OS=Homo sapiens GN=CDHR5 PE=1 SV=3	2656	Caco2P7_diffgpep1.13050.13050.4	controllerType=0 controllerNumber=1 scan=13050	61.465
11830:4	4	R.VEEDTKVN[+2117.777]STVIPETQLQAEDR.D	HexNAc(5)Hex(5)Fuc(2)NeuAc(0)	N[+2118]	1155.51	4	4619.02	4619.01	0	0.5	133	Specific	441.2	345.68	20.39	6.87	57	>sp|Q9HBB8|CDHR5_HUMAN Cadherin-related family member 5 OS=Homo sapiens GN=CDHR5 PE=1 SV=3	2656	Caco2P7_diffgpep1.11870.11870.4	controllerType=0 controllerNumber=1 scan=11870	55.8665
13402:4	4	R.VEEDTKVN[+2262.814]STVIPETQLQAEDR.D	HexNAc(5)Hex(5)Fuc(1)NeuAc(1)	N[+2263]	1191.77	4	4764.06	4764.05	0	2.1	133	Specific	456.74	263.8	24.05	6.55	57	>sp|Q9HBB8|CDHR5_HUMAN Cadherin-related family member 5 OS=Homo sapiens GN=CDHR5 PE=1 SV=3	2656	Caco2P7_diffgpep1.13196.13196.4	controllerType=0 controllerNumber=1 scan=13196	62.2034
14769:4	4	R.VEEDTKVN[+2919.042]STVIPETQLQAEDR.D	HexNAc(6)Hex(6)Fuc(1)NeuAc(2)	N[+2919]	1355.58	4	5419.3	5420.28	-1	4	133	Specific	462.81	329.81	329.81	6.67	57	>sp|Q9HBB8|CDHR5_HUMAN Cadherin-related family member 5 OS=Homo sapiens GN=CDHR5 PE=1 SV=3	2656	Caco2P7_diffgpep1.14318.14318.4	controllerType=0 controllerNumber=1 scan=14318	67.7332
11686:3	4	R.VEEDTKVN[+1864.634]STVIPETQLQAEDR.D	HexNAc(2)Hex(9)Fuc(0)NeuAc(0)	N[+1865]	1455.97	3	4365.9	4365.87	0	5.7	133	Specific	495.73	390.58	390.58	8.32	57	>sp|Q9HBB8|CDHR5_HUMAN Cadherin-related family member 5 OS=Homo sapiens GN=CDHR5 PE=1 SV=3	2656	Caco2P7_diffgpep1.11742.11742.3	controllerType=0 controllerNumber=1 scan=11742	55.2581
11729:3	4	R.VEEDTKVN[+1864.634]STVIPETQLQAEDR.D	HexNAc(2)Hex(9)Fuc(0)NeuAc(0)	N[+1865]	1455.97	3	4365.89	4365.87	0	4.7	133	Specific	589.21	451.41	451.41	10.21	57	>sp|Q9HBB8|CDHR5_HUMAN Cadherin-related family member 5 OS=Homo sapiens GN=CDHR5 PE=1 SV=3	2656	Caco2P7_diffgpep1.11781.11781.3	controllerType=0 controllerNumber=1 scan=11781	55.438
11715:3	4	R.VEEDTKVN[+1864.634]STVIPETQLQAEDR.D	HexNAc(2)Hex(9)Fuc(0)NeuAc(0)	N[+1865]	1455.63	3	4364.88	4365.87	-1	3.1	133	Specific	617.13	473.98	473.98	11.52	57	>sp|Q9HBB8|CDHR5_HUMAN Cadherin-related family member 5 OS=Homo sapiens GN=CDHR5 PE=1 SV=3	2656	Caco2P7_diffgpep1.11770.11770.3	controllerType=0 controllerNumber=1 scan=11770	55.3862
11849:4	4	R.VEEDTKVN[+1971.719]STVIPETQLQAEDR.D	HexNAc(5)Hex(5)Fuc(1)NeuAc(0)	N[+1972]	1119	4	4472.97	4472.96	0	2.6	133	Specific	643.68	556.75	556.75	11.29	57	>sp|Q9HBB8|CDHR5_HUMAN Cadherin-related family member 5 OS=Homo sapiens GN=CDHR5 PE=1 SV=3	2656	Caco2P7_diffgpep1.11891.11891.4	controllerType=0 controllerNumber=1 scan=11891	55.9564
11815:3	4	K.VN[+1663.608]STVIPETQLQAEDR.D	HexNAc(5)Hex(4)Fuc(0)NeuAc(0)	N[+1664]	1155.18	3	3463.52	3463.52	0	-0.4	139	Specific	194.96	194.96	194.96	4.11	57	>sp|Q9HBB8|CDHR5_HUMAN Cadherin-related family member 5 OS=Homo sapiens GN=CDHR5 PE=1 SV=3	2656	Caco2P7_diffgpep1.11856.11856.4	controllerType=0 controllerNumber=1 scan=11856	55.7981
11299:3	4	K.VN[+1864.634]STVIPETQLQAEDR.D	HexNAc(2)Hex(9)Fuc(0)NeuAc(0)	N[+1865]	1222.19	3	3664.54	3664.55	0	-0.7	139	Specific	453.25	413.45	413.45	8.72	57	>sp|Q9HBB8|CDHR5_HUMAN Cadherin-related family member 5 OS=Homo sapiens GN=CDHR5 PE=1 SV=3	2656	Caco2P7_diffgpep1.11396.11396.3	controllerType=0 controllerNumber=1 scan=11396	53.6302
20705:4	5	R.GDVFTMPEDEYTVYDDGEEKNN[+1378.476]ATVHEQVGGPSLTSDLQAQSK.G	HexNAc(2)Hex(6)Fuc(0)NeuAc(0)	N[+1378]	1520.65	4	6079.6	6079.58	0	2.6	65	Specific	137.7	137.7	137.7	4.38	51	>sp|P04004|VTNC_HUMAN Vitronectin OS=Homo sapiens GN=VTN PE=1 SV=1	18955	Caco2P7_diffgpep1.19027.19027.4	controllerType=0 controllerNumber=1 scan=19027	90.6007
20913:4	5	R.GDVFTMPEDEYTVYDDGEEKNN[+1702.581]ATVHEQVGGPSLTSDLQAQSK.G	HexNAc(2)Hex(8)Fuc(0)NeuAc(0)	N[+1703]	1601.93	4	6404.71	6403.69	1	3.7	65	Specific	152.98	128.53	128.53	4.35	51	>sp|P04004|VTNC_HUMAN Vitronectin OS=Homo sapiens GN=VTN PE=1 SV=1	18955	Caco2P7_diffgpep1.19199.19199.4	controllerType=0 controllerNumber=1 scan=19199	91.4113
20654:4	5	R.GDVFTMPEDEYTVYDDGEEKNN[+1702.581]ATVHEQVGGPSLTSDLQAQSK.G	HexNAc(2)Hex(8)Fuc(0)NeuAc(0)	N[+1703]	1601.69	4	6403.73	6403.69	0	6.2	65	Specific	266.54	251.43	251.43	6.37	51	>sp|P04004|VTNC_HUMAN Vitronectin OS=Homo sapiens GN=VTN PE=1 SV=1	18955	Caco2P7_diffgpep1.18985.18985.4	controllerType=0 controllerNumber=1 scan=18985	90.3941
20682:4	5	R.GDVFTMPEDEYTVYDDGEEKNN[+1378.476]ATVHEQVGGPSLTSDLQAQSK.G	HexNAc(2)Hex(6)Fuc(0)NeuAc(0)	N[+1378]	1520.65	4	6079.59	6079.58	0	1.3	65	Specific	271.72	250.84	250.84	6.96	51	>sp|P04004|VTNC_HUMAN Vitronectin OS=Homo sapiens GN=VTN PE=1 SV=1	18955	Caco2P7_diffgpep1.19009.19009.4	controllerType=0 controllerNumber=1 scan=19009	90.5112
20549:5	5	R.GDVFTMPEDEYTVYDDGEEKNN[+1727.613]ATVHEQVGGPSLTSDLQAQSK.G	HexNAc(3)Hex(6)Fuc(1)NeuAc(0)	N[+1728]	1286.34	5	6427.66	6428.72	-1	-7.9	65	Specific	372.98	317.69	317.69	6.18	51	>sp|P04004|VTNC_HUMAN Vitronectin OS=Homo sapiens GN=VTN PE=1 SV=1	18955	Caco2P7_diffgpep1.18900.18900.5	controllerType=0 controllerNumber=1 scan=18900	89.9801
20535:4	5	R.GDVFTMPEDEYTVYDDGEEKNN[+1864.634]ATVHEQVGGPSLTSDLQAQSK.G	HexNAc(2)Hex(9)Fuc(0)NeuAc(0)	N[+1865]	1642.2	4	6565.77	6565.74	0	4.6	65	Specific	380.78	323.01	323.01	7.16	51	>sp|P04004|VTNC_HUMAN Vitronectin OS=Homo sapiens GN=VTN PE=1 SV=1	18955	Caco2P7_diffgpep1.18889.18889.4	controllerType=0 controllerNumber=1 scan=18889	89.9281
20622:4	5	R.GDVFTMPEDEYTVYDDGEEKNN[+1540.529]ATVHEQVGGPSLTSDLQAQSK.G	HexNAc(2)Hex(7)Fuc(0)NeuAc(0)	N[+1541]	1561.18	4	6241.69	6241.63	0	8.2	65	Specific	482.98	453.01	453.01	9.02	51	>sp|P04004|VTNC_HUMAN Vitronectin OS=Homo sapiens GN=VTN PE=1 SV=1	18955	Caco2P7_diffgpep1.18958.18958.4	controllerType=0 controllerNumber=1 scan=18958	90.2635
20597:4	5	R.GDVFTMPEDEYTVYDDGEEKNN[+1540.529]ATVHEQVGGPSLTSDLQAQSK.G	HexNAc(2)Hex(7)Fuc(0)NeuAc(0)	N[+1541]	1561.17	4	6241.66	6241.63	0	4	65	Specific	540.93	503.83	503.83	9.9	51	>sp|P04004|VTNC_HUMAN Vitronectin OS=Homo sapiens GN=VTN PE=1 SV=1	18955	Caco2P7_diffgpep1.18938.18938.4	controllerType=0 controllerNumber=1 scan=18938	90.1669
20590:5	5	R.GDVFTMPEDEYTVYDDGEEKNN[+1540.529]ATVHEQVGGPSLTSDLQAQSK.G	HexNAc(2)Hex(7)Fuc(0)NeuAc(0)	N[+1541]	1249.14	5	6241.67	6241.63	0	6.1	65	Specific	565.66	509.94	509.94	9.38	51	>sp|P04004|VTNC_HUMAN Vitronectin OS=Homo sapiens GN=VTN PE=1 SV=1	18955	Caco2P7_diffgpep1.18932.18932.5	controllerType=0 controllerNumber=1 scan=18932	90.1382
20518:5	5	R.GDVFTMPEDEYTVYDDGEEKNN[+1864.634]ATVHEQVGGPSLTSDLQAQSK.G	HexNAc(2)Hex(9)Fuc(0)NeuAc(0)	N[+1865]	1313.96	5	6565.75	6565.74	0	2.2	65	Specific	680.69	603.09	603.09	13.11	51	>sp|P04004|VTNC_HUMAN Vitronectin OS=Homo sapiens GN=VTN PE=1 SV=1	18955	Caco2P7_diffgpep1.18873.18873.5	controllerType=0 controllerNumber=1 scan=18873	89.8529
20566:5	5	R.GDVFTMPEDEYTVYDDGEEKNN[+1702.581]ATVHEQVGGPSLTSDLQAQSK.G	HexNAc(2)Hex(8)Fuc(0)NeuAc(0)	N[+1703]	1281.55	5	6403.7	6403.69	0	2.1	65	Specific	860.02	751.76	751.76	17.25	51	>sp|P04004|VTNC_HUMAN Vitronectin OS=Homo sapiens GN=VTN PE=1 SV=1	18955	Caco2P7_diffgpep1.18913.18913.5	controllerType=0 controllerNumber=1 scan=18913	90.0425
10204:3	5	K.NN[+1864.634]ATVHEQVGGPSLTSDLQAQSK.G	HexNAc(2)Hex(9)Fuc(0)NeuAc(0)	N[+1865]	1415.61	3	4244.81	4245.8	-1	2.4	85	Specific	239.55	128.4	128.4	5.49	51	>sp|P04004|VTNC_HUMAN Vitronectin OS=Homo sapiens GN=VTN PE=1 SV=1	18955	Caco2P7_diffgpep1.10423.10423.3	controllerType=0 controllerNumber=1 scan=10423	48.9887
10160:4	5	K.NN[+1702.581]ATVHEQVGGPSLTSDLQAQSK.G	HexNAc(2)Hex(8)Fuc(0)NeuAc(0)	N[+1703]	1021.7	4	4083.77	4083.75	0	3.7	85	Specific	366.11	178.98	178.98	6.31	51	>sp|P04004|VTNC_HUMAN Vitronectin OS=Homo sapiens GN=VTN PE=1 SV=1	18955	Caco2P7_diffgpep1.10392.10392.4	controllerType=0 controllerNumber=1 scan=10392	48.8362
10216:3	5	K.NN[+1540.529]ATVHEQVGGPSLTSDLQAQSK.G	HexNAc(2)Hex(7)Fuc(0)NeuAc(0)	N[+1541]	1307.91	3	3921.72	3921.7	0	4.4	85	Specific	374.93	288.72	288.72	6.72	51	>sp|P04004|VTNC_HUMAN Vitronectin OS=Homo sapiens GN=VTN PE=1 SV=1	18955	Caco2P7_diffgpep1.10435.10435.3	controllerType=0 controllerNumber=1 scan=10435	49.0417
10189:4	5	K.NN[+1702.581]ATVHEQVGGPSLTSDLQAQSK.G	HexNAc(2)Hex(8)Fuc(0)NeuAc(0)	N[+1703]	1021.69	4	4083.76	4083.75	0	1.4	85	Specific	391.3	210.18	210.18	6.67	51	>sp|P04004|VTNC_HUMAN Vitronectin OS=Homo sapiens GN=VTN PE=1 SV=1	18955	Caco2P7_diffgpep1.10413.10413.4	controllerType=0 controllerNumber=1 scan=10413	48.938
10143:3	5	K.NN[+1864.634]ATVHEQVGGPSLTSDLQAQSK.G	HexNAc(2)Hex(9)Fuc(0)NeuAc(0)	N[+1865]	1415.94	3	4245.82	4245.8	0	3.4	85	Specific	434.26	330.13	330.13	7.41	51	>sp|P04004|VTNC_HUMAN Vitronectin OS=Homo sapiens GN=VTN PE=1 SV=1	18955	Caco2P7_diffgpep1.10381.10381.3	controllerType=0 controllerNumber=1 scan=10381	48.7803
10267:3	5	K.NN[+1540.529]ATVHEQVGGPSLTSDLQAQSK.G	HexNAc(2)Hex(7)Fuc(0)NeuAc(0)	N[+1541]	1307.9	3	3921.7	3921.7	0	0.2	85	Specific	491.91	400.64	400.64	9.35	51	>sp|P04004|VTNC_HUMAN Vitronectin OS=Homo sapiens GN=VTN PE=1 SV=1	18955	Caco2P7_diffgpep1.10481.10481.3	controllerType=0 controllerNumber=1 scan=10481	49.2661
10261:3	5	K.NN[+1540.529]ATVHEQVGGPSLTSDLQAQSK.G	HexNAc(2)Hex(7)Fuc(0)NeuAc(0)	N[+1541]	1307.9	3	3921.67	3921.7	0	-6	85	Specific	541.72	482.33	482.33	8.6	51	>sp|P04004|VTNC_HUMAN Vitronectin OS=Homo sapiens GN=VTN PE=1 SV=1	18955	Caco2P7_diffgpep1.10476.10476.3	controllerType=0 controllerNumber=1 scan=10476	49.2432
10294:3	5	K.NN[+1378.476]ATVHEQVGGPSLTSDLQAQSK.G	HexNAc(2)Hex(6)Fuc(0)NeuAc(0)	N[+1378]	1253.89	3	3759.64	3759.64	0	-0.3	85	Specific	580.99	521.17	521.17	10.86	51	>sp|P04004|VTNC_HUMAN Vitronectin OS=Homo sapiens GN=VTN PE=1 SV=1	18955	Caco2P7_diffgpep1.10506.10506.3	controllerType=0 controllerNumber=1 scan=10506	49.3895
10303:3	5	K.NN[+1378.476]ATVHEQVGGPSLTSDLQAQSK.G	HexNAc(2)Hex(6)Fuc(0)NeuAc(0)	N[+1378]	1253.89	3	3759.67	3759.64	0	5.8	85	Specific	614.34	530.77	530.77	11.65	51	>sp|P04004|VTNC_HUMAN Vitronectin OS=Homo sapiens GN=VTN PE=1 SV=1	18955	Caco2P7_diffgpep1.10515.10515.3	controllerType=0 controllerNumber=1 scan=10515	49.4344
10174:3	5	K.NN[+1702.581]ATVHEQVGGPSLTSDLQAQSK.G	HexNAc(2)Hex(8)Fuc(0)NeuAc(0)	N[+1703]	1361.93	3	4083.76	4083.75	0	2.7	85	Specific	878.05	698.39	698.39	17.1	51	>sp|P04004|VTNC_HUMAN Vitronectin OS=Homo sapiens GN=VTN PE=1 SV=1	18955	Caco2P7_diffgpep1.10403.10403.3	controllerType=0 controllerNumber=1 scan=10403	48.8877
12168:2	5	K.N[+1702.581]GSLFAFR.G	HexNAc(2)Hex(8)Fuc(0)NeuAc(0)	N[+1703]	1307.53	2	2614.06	2614.05	0	2	169	Specific	178.34	107.14	107.14	2	51	>sp|P04004|VTNC_HUMAN Vitronectin OS=Homo sapiens GN=VTN PE=1 SV=1	18955	Caco2P7_diffgpep1.12180.12180.3	controllerType=0 controllerNumber=1 scan=12180	57.2971
12028:2	5	K.N[+2026.687]GSLFAFR.G	HexNAc(2)Hex(10)Fuc(0)NeuAc(0)	N[+2027]	1469.58	2	2938.16	2938.16	0	0.7	169	Specific	208.71	74.16	74.16	2.02	51	>sp|P04004|VTNC_HUMAN Vitronectin OS=Homo sapiens GN=VTN PE=1 SV=1	18955	Caco2P7_diffgpep1.12055.12055.2	controllerType=0 controllerNumber=1 scan=12055	56.7061
12020:2	5	K.N[+2026.687]GSLFAFR.G	HexNAc(2)Hex(10)Fuc(0)NeuAc(0)	N[+2027]	1469.59	2	2938.17	2938.16	0	2.9	169	Specific	243.45	99.55	99.55	4.54	51	>sp|P04004|VTNC_HUMAN Vitronectin OS=Homo sapiens GN=VTN PE=1 SV=1	18955	Caco2P7_diffgpep1.12048.12048.2	controllerType=0 controllerNumber=1 scan=12048	56.6719
12197:2	5	K.N[+1864.634]GSLFAFR.G	HexNAc(2)Hex(9)Fuc(0)NeuAc(0)	N[+1865]	1388.56	2	2776.11	2776.11	0	1.1	169	Specific	265.76	129.27	129.27	5.26	51	>sp|P04004|VTNC_HUMAN Vitronectin OS=Homo sapiens GN=VTN PE=1 SV=1	18955	Caco2P7_diffgpep1.12202.12202.2	controllerType=0 controllerNumber=1 scan=12202	57.4011
12041:2	5	K.N[+1864.634]GSLFAFR.G	HexNAc(2)Hex(9)Fuc(0)NeuAc(0)	N[+1865]	1388.56	2	2776.12	2776.11	0	3.8	169	Specific	279.41	144.99	144.99	5.47	51	>sp|P04004|VTNC_HUMAN Vitronectin OS=Homo sapiens GN=VTN PE=1 SV=1	18955	Caco2P7_diffgpep1.12070.12070.2	controllerType=0 controllerNumber=1 scan=12070	56.7653
12165:2	5	K.N[+1702.581]GSLFAFR.G	HexNAc(2)Hex(8)Fuc(0)NeuAc(0)	N[+1703]	1307.53	2	2614.06	2614.05	0	2	169	Specific	368.4	231.34	231.34	6.26	51	>sp|P04004|VTNC_HUMAN Vitronectin OS=Homo sapiens GN=VTN PE=1 SV=1	18955	Caco2P7_diffgpep1.12178.12178.2	controllerType=0 controllerNumber=1 scan=12178	57.2863
28044:4	5	R.FEDGVLDPDYPRN[+2553.910]ISDGFDGIPDNVDAALALPAHSYSGR.E	HexNAc(5)Hex(5)Fuc(1)NeuAc(2)	N[+2554]	1682.97	4	6728.88	6729.87	-1	1.7	230	Specific	51.86	51.86	51.86	2.56	51	>sp|P04004|VTNC_HUMAN Vitronectin OS=Homo sapiens GN=VTN PE=1 SV=1	18955	Caco2P7_diffgpep1.27456.27456.4	controllerType=0 controllerNumber=1 scan=27456	126.642
27944:5	5	R.FEDGVLDPDYPRN[+3065.100]ISDGFDGIPDNVDAALALPAHSYSGR.E	HexNAc(6)Hex(6)Fuc(2)NeuAc(2)	N[+3065]	1448.82	5	7240.07	7241.06	-1	2.2	230	Specific	363.6	338.8	40.7	7.45	51	>sp|P04004|VTNC_HUMAN Vitronectin OS=Homo sapiens GN=VTN PE=1 SV=1	18955	Caco2P7_diffgpep1.27252.27252.5	controllerType=0 controllerNumber=1 scan=27252	125.824
26932:5	5	R.FEDGVLDPDYPRN[+2774.004]ISDGFDGIPDNVDAALALPAHSYSGR.E	HexNAc(6)Hex(6)Fuc(2)NeuAc(1)	N[+2774]	1390.8	5	6949.99	6949.96	0	3.7	230	Specific	421.1	402.12	19.04	9.36	51	>sp|P04004|VTNC_HUMAN Vitronectin OS=Homo sapiens GN=VTN PE=1 SV=1	18955	Caco2P7_diffgpep1.25630.25630.5	controllerType=0 controllerNumber=1 scan=25630	119.132
26909:5	5	R.FEDGVLDPDYPRN[+2774.004]ISDGFDGIPDNVDAALALPAHSYSGR.E	HexNAc(6)Hex(6)Fuc(2)NeuAc(1)	N[+2774]	1390.8	5	6949.99	6949.96	0	3.6	230	Specific	448.95	409.21	18.45	9.46	51	>sp|P04004|VTNC_HUMAN Vitronectin OS=Homo sapiens GN=VTN PE=1 SV=1	18955	Caco2P7_diffgpep1.25604.25604.5	controllerType=0 controllerNumber=1 scan=25604	119.022
27058:5	5	R.FEDGVLDPDYPRN[+2262.814]ISDGFDGIPDNVDAALALPAHSYSGR.E	HexNAc(5)Hex(5)Fuc(1)NeuAc(1)	N[+2263]	1288.36	5	6437.79	6438.77	-1	3.3	230	Specific	458.76	452.67	452.67	9.44	51	>sp|P04004|VTNC_HUMAN Vitronectin OS=Homo sapiens GN=VTN PE=1 SV=1	18955	Caco2P7_diffgpep1.25785.25785.5	controllerType=0 controllerNumber=1 scan=25785	119.78
25174:5	5	R.N[+2262.814]ISDGFDGIPDNVDAALALPAHSYSGR.E	HexNAc(5)Hex(5)Fuc(1)NeuAc(1)	N[+2263]	1007.83	5	5035.13	5035.14	0	-0.9	242	Specific	190.75	183	32.51	2.41	51	>sp|P04004|VTNC_HUMAN Vitronectin OS=Homo sapiens GN=VTN PE=1 SV=1	18955	Caco2P7_diffgpep1.23259.23259.5	controllerType=0 controllerNumber=1 scan=23259	109.364
23352:4	5	R.N[+2481.889]ISDGFDGIPDNVDAALALPAHSYSGR.E	HexNAc(6)Hex(6)Fuc(0)NeuAc(1)	N[+2482]	1314.57	4	5255.26	5254.21	1	8.3	242	Specific	191.6	99.42	16.07	2.02	51	>sp|P04004|VTNC_HUMAN Vitronectin OS=Homo sapiens GN=VTN PE=1 SV=1	18955	Caco2P7_diffgpep1.21310.21310.4	controllerType=0 controllerNumber=1 scan=21310	100.986
23553:4	5	R.N[+2117.777]ISDGFDGIPDNVDAALALPAHSYSGR.E	HexNAc(5)Hex(5)Fuc(2)NeuAc(0)	N[+2118]	1223.29	4	4890.14	4890.1	0	8	242	Specific	200.93	149.25	149.25	2.01	51	>sp|P04004|VTNC_HUMAN Vitronectin OS=Homo sapiens GN=VTN PE=1 SV=1	18955	Caco2P7_diffgpep1.21483.21483.4	controllerType=0 controllerNumber=1 scan=21483	101.766
25169:4	5	R.N[+2246.819]ISDGFDGIPDNVDAALALPAHSYSGR.E	HexNAc(5)Hex(4)Fuc(2)NeuAc(1)	N[+2247]	1255.54	4	5019.14	5019.14	0	-0.8	242	Specific	203.92	105.53	37.67	2	51	>sp|P04004|VTNC_HUMAN Vitronectin OS=Homo sapiens GN=VTN PE=1 SV=1	18955	Caco2P7_diffgpep1.23248.23248.4	controllerType=0 controllerNumber=1 scan=23248	109.323
23573:3	5	R.N[+2026.687]ISDGFDGIPDNVDAALALPAHSYSGR.E	HexNAc(2)Hex(10)Fuc(0)NeuAc(0)	N[+2027]	1600.68	3	4800.02	4799.01	1	0.9	242	Specific	213.6	179.47	36.81	4.28	51	>sp|P04004|VTNC_HUMAN Vitronectin OS=Homo sapiens GN=VTN PE=1 SV=1	18955	Caco2P7_diffgpep1.21499.21499.3	controllerType=0 controllerNumber=1 scan=21499	101.845
25133:4	5	R.N[+2246.819]ISDGFDGIPDNVDAALALPAHSYSGR.E	HexNAc(5)Hex(4)Fuc(2)NeuAc(1)	N[+2247]	1255.8	4	5020.18	5019.14	1	6.5	242	Specific	231.52	192.95	18.64	4.33	51	>sp|P04004|VTNC_HUMAN Vitronectin OS=Homo sapiens GN=VTN PE=1 SV=1	18955	Caco2P7_diffgpep1.23196.23196.4	controllerType=0 controllerNumber=1 scan=23196	109.111
23611:4	5	R.N[+2026.687]ISDGFDGIPDNVDAALALPAHSYSGR.E	HexNAc(2)Hex(10)Fuc(0)NeuAc(0)	N[+2027]	1200.5	4	4798.97	4799.01	0	-7.7	242	Specific	235.23	185.33	185.33	3.25	51	>sp|P04004|VTNC_HUMAN Vitronectin OS=Homo sapiens GN=VTN PE=1 SV=1	18955	Caco2P7_diffgpep1.21528.21528.4	controllerType=0 controllerNumber=1 scan=21528	101.991
25170:4	5	R.N[+2246.819]ISDGFDGIPDNVDAALALPAHSYSGR.E	HexNAc(5)Hex(4)Fuc(2)NeuAc(1)	N[+2247]	1255.54	4	5019.13	5019.14	0	-3.1	242	Specific	243.29	192.41	36.57	5.11	51	>sp|P04004|VTNC_HUMAN Vitronectin OS=Homo sapiens GN=VTN PE=1 SV=1	18955	Caco2P7_diffgpep1.23251.23251.4	controllerType=0 controllerNumber=1 scan=23251	109.335
25210:4	5	R.N[+2100.761]ISDGFDGIPDNVDAALALPAHSYSGR.E	HexNAc(5)Hex(4)Fuc(1)NeuAc(1)	N[+2101]	1219.03	4	4873.09	4873.08	0	0.9	242	Specific	249.98	65.34	31.58	2.6	51	>sp|P04004|VTNC_HUMAN Vitronectin OS=Homo sapiens GN=VTN PE=1 SV=1	18955	Caco2P7_diffgpep1.23310.23310.4	controllerType=0 controllerNumber=1 scan=23310	109.564
25049:4	5	R.N[+2627.947]ISDGFDGIPDNVDAALALPAHSYSGR.E	HexNAc(6)Hex(6)Fuc(1)NeuAc(1)	N[+2628]	1350.83	4	5400.3	5400.27	0	5.7	242	Specific	251.26	194.42	18.93	5.31	51	>sp|P04004|VTNC_HUMAN Vitronectin OS=Homo sapiens GN=VTN PE=1 SV=1	18955	Caco2P7_diffgpep1.23091.23091.4	controllerType=0 controllerNumber=1 scan=23091	108.688
23689:4	5	R.N[+1809.666]ISDGFDGIPDNVDAALALPAHSYSGR.E	HexNAc(5)Hex(4)Fuc(1)NeuAc(0)	N[+1810]	1146.25	4	4582	4581.99	0	1.6	242	Specific	254.98	158.34	158.34	5.66	51	>sp|P04004|VTNC_HUMAN Vitronectin OS=Homo sapiens GN=VTN PE=1 SV=1	18955	Caco2P7_diffgpep1.21599.21599.4	controllerType=0 controllerNumber=1 scan=21599	102.318
23787:4	5	R.N[+1378.476]ISDGFDGIPDNVDAALALPAHSYSGR.E	HexNAc(2)Hex(6)Fuc(0)NeuAc(0)	N[+1378]	1038.46	4	4150.8	4150.8	0	1.3	242	Specific	257.58	139.8	139.8	4.66	51	>sp|P04004|VTNC_HUMAN Vitronectin OS=Homo sapiens GN=VTN PE=1 SV=1	18955	Caco2P7_diffgpep1.21699.21699.4	controllerType=0 controllerNumber=1 scan=21699	102.752
23407:4	5	R.N[+2482.909]ISDGFDGIPDNVDAALALPAHSYSGR.E	HexNAc(6)Hex(6)Fuc(2)NeuAc(0)	N[+2483]	1314.57	4	5255.27	5255.23	0	7.4	242	Specific	272.54	126.45	126.45	4.98	51	>sp|P04004|VTNC_HUMAN Vitronectin OS=Homo sapiens GN=VTN PE=1 SV=1	18955	Caco2P7_diffgpep1.21359.21359.4	controllerType=0 controllerNumber=1 scan=21359	101.199
23425:4	5	R.N[+2482.909]ISDGFDGIPDNVDAALALPAHSYSGR.E	HexNAc(6)Hex(6)Fuc(2)NeuAc(0)	N[+2483]	1314.82	4	5256.27	5255.23	1	6	242	Specific	276.22	225.2	225.2	5.68	51	>sp|P04004|VTNC_HUMAN Vitronectin OS=Homo sapiens GN=VTN PE=1 SV=1	18955	Caco2P7_diffgpep1.21374.21374.4	controllerType=0 controllerNumber=1 scan=21374	101.269
23347:4	5	R.N[+2627.947]ISDGFDGIPDNVDAALALPAHSYSGR.E	HexNAc(6)Hex(6)Fuc(1)NeuAc(1)	N[+2628]	1351.08	4	5401.31	5400.27	1	6.8	242	Specific	277.97	235.36	15.08	5.61	51	>sp|P04004|VTNC_HUMAN Vitronectin OS=Homo sapiens GN=VTN PE=1 SV=1	18955	Caco2P7_diffgpep1.21307.21307.4	controllerType=0 controllerNumber=1 scan=21307	100.97
23505:4	5	R.N[+1864.634]ISDGFDGIPDNVDAALALPAHSYSGR.E	HexNAc(2)Hex(9)Fuc(0)NeuAc(0)	N[+1865]	1159.74	4	4635.92	4636.96	-1	-6.4	242	Specific	283.45	80.61	80.61	3.06	51	>sp|P04004|VTNC_HUMAN Vitronectin OS=Homo sapiens GN=VTN PE=1 SV=1	18955	Caco2P7_diffgpep1.21444.21444.4	controllerType=0 controllerNumber=1 scan=21444	101.582
25222:4	5	R.N[+2100.761]ISDGFDGIPDNVDAALALPAHSYSGR.E	HexNAc(5)Hex(4)Fuc(1)NeuAc(1)	N[+2101]	1218.78	4	4872.09	4873.08	-1	2.6	242	Specific	285.84	256.88	256.88	6.15	51	>sp|P04004|VTNC_HUMAN Vitronectin OS=Homo sapiens GN=VTN PE=1 SV=1	18955	Caco2P7_diffgpep1.23337.23337.4	controllerType=0 controllerNumber=1 scan=23337	109.674
26770:4	5	R.N[+2392.877]ISDGFDGIPDNVDAALALPAHSYSGR.E	HexNAc(5)Hex(4)Fuc(3)NeuAc(1)	N[+2393]	1292.05	4	5165.19	5165.2	0	-1.9	242	Specific	288.76	150.01	20.6	4.56	51	>sp|P04004|VTNC_HUMAN Vitronectin OS=Homo sapiens GN=VTN PE=1 SV=1	18955	Caco2P7_diffgpep1.25381.25381.4	controllerType=0 controllerNumber=1 scan=25381	118.121
23762:4	5	R.N[+1378.476]ISDGFDGIPDNVDAALALPAHSYSGR.E	HexNAc(2)Hex(6)Fuc(0)NeuAc(0)	N[+1378]	1038.46	4	4150.8	4150.8	0	0.7	242	Specific	303.91	200.86	200.86	6.16	51	>sp|P04004|VTNC_HUMAN Vitronectin OS=Homo sapiens GN=VTN PE=1 SV=1	18955	Caco2P7_diffgpep1.21675.21675.4	controllerType=0 controllerNumber=1 scan=21675	102.641
25157:4	5	R.N[+2246.819]ISDGFDGIPDNVDAALALPAHSYSGR.E	HexNAc(5)Hex(4)Fuc(2)NeuAc(1)	N[+2247]	1255.55	4	5019.16	5019.14	0	4	242	Specific	308.77	85.82	19.72	5.19	51	>sp|P04004|VTNC_HUMAN Vitronectin OS=Homo sapiens GN=VTN PE=1 SV=1	18955	Caco2P7_diffgpep1.23223.23223.4	controllerType=0 controllerNumber=1 scan=23223	109.228
23549:4	5	R.N[+2116.756]ISDGFDGIPDNVDAALALPAHSYSGR.E	HexNAc(5)Hex(5)Fuc(0)NeuAc(1)	N[+2117]	1223.28	4	4890.09	4889.08	1	2.4	242	Specific	330.78	151.6	16.7	6.02	51	>sp|P04004|VTNC_HUMAN Vitronectin OS=Homo sapiens GN=VTN PE=1 SV=1	18955	Caco2P7_diffgpep1.21479.21479.4	controllerType=0 controllerNumber=1 scan=21479	101.749
25067:4	5	R.N[+2627.947]ISDGFDGIPDNVDAALALPAHSYSGR.E	HexNAc(6)Hex(6)Fuc(1)NeuAc(1)	N[+2628]	1350.83	4	5400.29	5400.27	0	3.7	242	Specific	344.46	268.31	19.16	6.35	51	>sp|P04004|VTNC_HUMAN Vitronectin OS=Homo sapiens GN=VTN PE=1 SV=1	18955	Caco2P7_diffgpep1.23114.23114.4	controllerType=0 controllerNumber=1 scan=23114	108.782
23673:3	5	R.N[+1864.634]ISDGFDGIPDNVDAALALPAHSYSGR.E	HexNAc(2)Hex(9)Fuc(0)NeuAc(0)	N[+1865]	1546.66	3	4637.97	4636.96	1	2.1	242	Specific	346.95	331.47	29.92	7.07	51	>sp|P04004|VTNC_HUMAN Vitronectin OS=Homo sapiens GN=VTN PE=1 SV=1	18955	Caco2P7_diffgpep1.21584.21584.3	controllerType=0 controllerNumber=1 scan=21584	102.248
25246:4	5	R.N[+2262.814]ISDGFDGIPDNVDAALALPAHSYSGR.E	HexNAc(5)Hex(5)Fuc(1)NeuAc(1)	N[+2263]	1259.29	4	5034.15	5035.14	-1	3	242	Specific	389.76	267.67	267.67	6.49	51	>sp|P04004|VTNC_HUMAN Vitronectin OS=Homo sapiens GN=VTN PE=1 SV=1	18955	Caco2P7_diffgpep1.23364.23364.4	controllerType=0 controllerNumber=1 scan=23364	109.791
25140:4	5	R.N[+2262.814]ISDGFDGIPDNVDAALALPAHSYSGR.E	HexNAc(5)Hex(5)Fuc(1)NeuAc(1)	N[+2263]	1259.55	4	5035.16	5035.14	0	5.1	242	Specific	392.23	278.82	19.12	6.18	51	>sp|P04004|VTNC_HUMAN Vitronectin OS=Homo sapiens GN=VTN PE=1 SV=1	18955	Caco2P7_diffgpep1.23208.23208.4	controllerType=0 controllerNumber=1 scan=23208	109.159
23829:3	5	R.N[+1378.476]ISDGFDGIPDNVDAALALPAHSYSGR.E	HexNAc(2)Hex(6)Fuc(0)NeuAc(0)	N[+1378]	1384.28	3	4150.82	4150.8	0	6.2	242	Specific	394.36	311.06	311.06	6.45	51	>sp|P04004|VTNC_HUMAN Vitronectin OS=Homo sapiens GN=VTN PE=1 SV=1	18955	Caco2P7_diffgpep1.21740.21740.3	controllerType=0 controllerNumber=1 scan=21740	102.925
25147:4	5	R.N[+2262.814]ISDGFDGIPDNVDAALALPAHSYSGR.E	HexNAc(5)Hex(5)Fuc(1)NeuAc(1)	N[+2263]	1259.54	4	5035.15	5035.14	0	3.6	242	Specific	427.31	365.45	18.22	7.32	51	>sp|P04004|VTNC_HUMAN Vitronectin OS=Homo sapiens GN=VTN PE=1 SV=1	18955	Caco2P7_diffgpep1.23214.23214.4	controllerType=0 controllerNumber=1 scan=23214	109.186
23592:4	5	R.N[+2026.687]ISDGFDGIPDNVDAALALPAHSYSGR.E	HexNAc(2)Hex(10)Fuc(0)NeuAc(0)	N[+2027]	1200.76	4	4800.02	4799.01	1	2.1	242	Specific	470.04	322.54	13.19	7.24	51	>sp|P04004|VTNC_HUMAN Vitronectin OS=Homo sapiens GN=VTN PE=1 SV=1	18955	Caco2P7_diffgpep1.21514.21514.4	controllerType=0 controllerNumber=1 scan=21514	101.919
23522:4	5	R.N[+1864.634]ISDGFDGIPDNVDAALALPAHSYSGR.E	HexNAc(2)Hex(9)Fuc(0)NeuAc(0)	N[+1865]	1159.99	4	4636.95	4636.96	0	-0.4	242	Specific	473.18	269.2	269.2	6.55	51	>sp|P04004|VTNC_HUMAN Vitronectin OS=Homo sapiens GN=VTN PE=1 SV=1	18955	Caco2P7_diffgpep1.21456.21456.4	controllerType=0 controllerNumber=1 scan=21456	101.639
23578:4	5	R.N[+1971.719]ISDGFDGIPDNVDAALALPAHSYSGR.E	HexNAc(5)Hex(5)Fuc(1)NeuAc(0)	N[+1972]	1186.76	4	4744.03	4744.04	0	-1.5	242	Specific	498.62	353.84	353.84	6.8	51	>sp|P04004|VTNC_HUMAN Vitronectin OS=Homo sapiens GN=VTN PE=1 SV=1	18955	Caco2P7_diffgpep1.21504.21504.4	controllerType=0 controllerNumber=1 scan=21504	101.868
23754:3	5	R.N[+1378.476]ISDGFDGIPDNVDAALALPAHSYSGR.E	HexNAc(2)Hex(6)Fuc(0)NeuAc(0)	N[+1378]	1384.28	3	4150.82	4150.8	0	5.1	242	Specific	533.17	401.73	401.73	9.02	51	>sp|P04004|VTNC_HUMAN Vitronectin OS=Homo sapiens GN=VTN PE=1 SV=1	18955	Caco2P7_diffgpep1.21664.21664.3	controllerType=0 controllerNumber=1 scan=21664	102.594
23574:3	5	R.N[+1702.581]ISDGFDGIPDNVDAALALPAHSYSGR.E	HexNAc(2)Hex(8)Fuc(0)NeuAc(0)	N[+1703]	1492.31	3	4474.91	4474.9	0	0.7	242	Specific	552.58	488.82	488.82	9.52	51	>sp|P04004|VTNC_HUMAN Vitronectin OS=Homo sapiens GN=VTN PE=1 SV=1	18955	Caco2P7_diffgpep1.21500.21500.3	controllerType=0 controllerNumber=1 scan=21500	101.851
23523:4	5	R.N[+2026.687]ISDGFDGIPDNVDAALALPAHSYSGR.E	HexNAc(2)Hex(10)Fuc(0)NeuAc(0)	N[+2027]	1200.51	4	4799.03	4799.01	0	4.2	242	Specific	564.31	416.75	416.75	9.08	51	>sp|P04004|VTNC_HUMAN Vitronectin OS=Homo sapiens GN=VTN PE=1 SV=1	18955	Caco2P7_diffgpep1.21457.21457.4	controllerType=0 controllerNumber=1 scan=21457	101.645
23651:4	5	R.N[+1540.529]ISDGFDGIPDNVDAALALPAHSYSGR.E	HexNAc(2)Hex(7)Fuc(0)NeuAc(0)	N[+1541]	1078.97	4	4312.87	4312.85	0	3.4	242	Specific	575.43	384.03	384.03	9.37	51	>sp|P04004|VTNC_HUMAN Vitronectin OS=Homo sapiens GN=VTN PE=1 SV=1	18955	Caco2P7_diffgpep1.21561.21561.4	controllerType=0 controllerNumber=1 scan=21561	102.151
23658:3	5	R.N[+1540.529]ISDGFDGIPDNVDAALALPAHSYSGR.E	HexNAc(2)Hex(7)Fuc(0)NeuAc(0)	N[+1541]	1438.29	3	4312.86	4312.85	0	2.7	242	Specific	617.41	537.22	537.22	11.92	51	>sp|P04004|VTNC_HUMAN Vitronectin OS=Homo sapiens GN=VTN PE=1 SV=1	18955	Caco2P7_diffgpep1.21568.21568.3	controllerType=0 controllerNumber=1 scan=21568	102.181
23642:4	5	R.N[+1864.634]ISDGFDGIPDNVDAALALPAHSYSGR.E	HexNAc(2)Hex(9)Fuc(0)NeuAc(0)	N[+1865]	1160	4	4636.97	4636.96	0	2.7	242	Specific	692.54	536.7	536.7	12.68	51	>sp|P04004|VTNC_HUMAN Vitronectin OS=Homo sapiens GN=VTN PE=1 SV=1	18955	Caco2P7_diffgpep1.21555.21555.4	controllerType=0 controllerNumber=1 scan=21555	102.118
23612:3	5	R.N[+1702.581]ISDGFDGIPDNVDAALALPAHSYSGR.E	HexNAc(2)Hex(8)Fuc(0)NeuAc(0)	N[+1703]	1492.31	3	4474.91	4474.9	0	2.4	242	Specific	811.65	647.05	647.05	15.92	51	>sp|P04004|VTNC_HUMAN Vitronectin OS=Homo sapiens GN=VTN PE=1 SV=1	18955	Caco2P7_diffgpep1.21530.21530.3	controllerType=0 controllerNumber=1 scan=21530	101.997
27285:3	7	R.LLN[+2279.830]TTDVYLLPSLNPDGFER.A	HexNAc(5)Hex(6)Fuc(2)NeuAc(0)	N[+2280]	1519.69	3	4557.04	4557.01	0	8	170	Specific	131.35	131.35	131.35	2.33	78	>sp|O75976|CBPD_HUMAN Carboxypeptidase D OS=Homo sapiens GN=CPD PE=1 SV=2	2257	Caco2P7_diffgpep1.26116.26116.3	controllerType=0 controllerNumber=1 scan=26116	121.143
27263:4	7	R.LLN[+2278.809]TTDVYLLPSLNPDGFER.A	HexNAc(5)Hex(6)Fuc(0)NeuAc(1)	N[+2279]	1140.01	4	4557.02	4555.99	1	7.6	170	Specific	318.13	298.38	25.88	5.7	78	>sp|O75976|CBPD_HUMAN Carboxypeptidase D OS=Homo sapiens GN=CPD PE=1 SV=2	2257	Caco2P7_diffgpep1.26075.26075.4	controllerType=0 controllerNumber=1 scan=26075	120.982
25516:3	7	R.LLN[+1971.719]TTDVYLLPSLNPDGFER.A	HexNAc(5)Hex(5)Fuc(1)NeuAc(0)	N[+1972]	1416.98	3	4248.92	4248.9	0	5.8	170	Specific	356.23	325.89	325.89	6.3	78	>sp|O75976|CBPD_HUMAN Carboxypeptidase D OS=Homo sapiens GN=CPD PE=1 SV=2	2257	Caco2P7_diffgpep1.23680.23680.3	controllerType=0 controllerNumber=1 scan=23680	111.115
26895:4	7	R.LLN[+2627.947]TTDVYLLPSLNPDGFER.A	HexNAc(6)Hex(6)Fuc(1)NeuAc(1)	N[+2628]	1227.29	4	4906.16	4905.12	1	5.9	170	Specific	370.25	304.84	21.53	6.06	78	>sp|O75976|CBPD_HUMAN Carboxypeptidase D OS=Homo sapiens GN=CPD PE=1 SV=2	2257	Caco2P7_diffgpep1.25589.25589.4	controllerType=0 controllerNumber=1 scan=25589	118.956
25520:4	7	R.LLN[+1971.719]TTDVYLLPSLNPDGFER.A	HexNAc(5)Hex(5)Fuc(1)NeuAc(0)	N[+1972]	1062.98	4	4248.91	4248.9	0	2.4	170	Specific	402.01	402.01	402.01	8.56	78	>sp|O75976|CBPD_HUMAN Carboxypeptidase D OS=Homo sapiens GN=CPD PE=1 SV=2	2257	Caco2P7_diffgpep1.23685.23685.4	controllerType=0 controllerNumber=1 scan=23685	111.134
25473:3	7	R.LLN[+1971.719]TTDVYLLPSLNPDGFER.A	HexNAc(5)Hex(5)Fuc(1)NeuAc(0)	N[+1972]	1416.97	3	4248.91	4248.9	0	3.7	170	Specific	412.75	329.28	329.28	7.02	78	>sp|O75976|CBPD_HUMAN Carboxypeptidase D OS=Homo sapiens GN=CPD PE=1 SV=2	2257	Caco2P7_diffgpep1.23627.23627.3	controllerType=0 controllerNumber=1 scan=23627	110.902
25466:4	7	R.LLN[+1971.719]TTDVYLLPSLNPDGFER.A	HexNAc(5)Hex(5)Fuc(1)NeuAc(0)	N[+1972]	1062.98	4	4248.91	4248.9	0	3	170	Specific	413.17	412.78	412.78	8.56	78	>sp|O75976|CBPD_HUMAN Carboxypeptidase D OS=Homo sapiens GN=CPD PE=1 SV=2	2257	Caco2P7_diffgpep1.23619.23619.4	controllerType=0 controllerNumber=1 scan=23619	110.871
27309:3	7	R.LLN[+2262.814]TTDVYLLPSLNPDGFER.A	HexNAc(5)Hex(5)Fuc(1)NeuAc(1)	N[+2263]	1514.01	3	4540.01	4539.99	0	4.4	170	Specific	423.32	324.26	39.64	6.76	78	>sp|O75976|CBPD_HUMAN Carboxypeptidase D OS=Homo sapiens GN=CPD PE=1 SV=2	2257	Caco2P7_diffgpep1.26163.26163.3	controllerType=0 controllerNumber=1 scan=26163	121.341
27257:4	7	R.LLN[+2424.867]TTDVYLLPSLNPDGFER.A	HexNAc(5)Hex(6)Fuc(1)NeuAc(1)	N[+2425]	1176.27	4	4702.05	4702.04	0	1.9	170	Specific	427.69	427.69	28.37	8.73	78	>sp|O75976|CBPD_HUMAN Carboxypeptidase D OS=Homo sapiens GN=CPD PE=1 SV=2	2257	Caco2P7_diffgpep1.26065.26065.4	controllerType=0 controllerNumber=1 scan=26065	120.944
27244:4	7	R.LLN[+2424.867]TTDVYLLPSLNPDGFER.A	HexNAc(5)Hex(6)Fuc(1)NeuAc(1)	N[+2425]	1176.27	4	4702.06	4702.04	0	3.3	170	Specific	442.05	406.31	21.53	8.66	78	>sp|O75976|CBPD_HUMAN Carboxypeptidase D OS=Homo sapiens GN=CPD PE=1 SV=2	2257	Caco2P7_diffgpep1.26038.26038.4	controllerType=0 controllerNumber=1 scan=26038	120.839
25474:3	7	R.LLN[+1971.719]TTDVYLLPSLNPDGFER.A	HexNAc(5)Hex(5)Fuc(1)NeuAc(0)	N[+1972]	1416.98	3	4248.92	4248.9	0	4.8	170	Specific	454.41	347.13	347.13	6.98	78	>sp|O75976|CBPD_HUMAN Carboxypeptidase D OS=Homo sapiens GN=CPD PE=1 SV=2	2257	Caco2P7_diffgpep1.23629.23629.3	controllerType=0 controllerNumber=1 scan=23629	110.909
26933:4	7	R.LLN[+2627.947]TTDVYLLPSLNPDGFER.A	HexNAc(6)Hex(6)Fuc(1)NeuAc(1)	N[+2628]	1227.04	4	4905.14	4905.12	0	4.2	170	Specific	454.87	394.96	22.39	8.36	78	>sp|O75976|CBPD_HUMAN Carboxypeptidase D OS=Homo sapiens GN=CPD PE=1 SV=2	2257	Caco2P7_diffgpep1.25633.25633.4	controllerType=0 controllerNumber=1 scan=25633	119.144
27247:3	7	R.LLN[+2262.814]TTDVYLLPSLNPDGFER.A	HexNAc(5)Hex(5)Fuc(1)NeuAc(1)	N[+2263]	1514.01	3	4540	4539.99	0	2.5	170	Specific	477.44	401.54	29.93	8.89	78	>sp|O75976|CBPD_HUMAN Carboxypeptidase D OS=Homo sapiens GN=CPD PE=1 SV=2	2257	Caco2P7_diffgpep1.26047.26047.3	controllerType=0 controllerNumber=1 scan=26047	120.875
27334:4	7	R.LLN[+2262.814]TTDVYLLPSLNPDGFER.A	HexNAc(5)Hex(5)Fuc(1)NeuAc(1)	N[+2263]	1135.76	4	4540.01	4539.99	0	4.1	170	Specific	512.79	431.21	18.75	8.81	78	>sp|O75976|CBPD_HUMAN Carboxypeptidase D OS=Homo sapiens GN=CPD PE=1 SV=2	2257	Caco2P7_diffgpep1.26195.26195.4	controllerType=0 controllerNumber=1 scan=26195	121.468
27333:4	7	R.LLN[+2262.814]TTDVYLLPSLNPDGFER.A	HexNAc(5)Hex(5)Fuc(1)NeuAc(1)	N[+2263]	1135.76	4	4540	4539.99	0	2.3	170	Specific	531.6	487.22	26.25	8.95	78	>sp|O75976|CBPD_HUMAN Carboxypeptidase D OS=Homo sapiens GN=CPD PE=1 SV=2	2257	Caco2P7_diffgpep1.26193.26193.4	controllerType=0 controllerNumber=1 scan=26193	121.46
27233:4	7	R.LLN[+2408.872]TTDVYLLPSLNPDGFER.A	HexNAc(5)Hex(5)Fuc(2)NeuAc(1)	N[+2409]	1172.02	4	4685.04	4686.05	-1	-0.6	170	Specific	542.87	463.34	28.16	8.85	78	>sp|O75976|CBPD_HUMAN Carboxypeptidase D OS=Homo sapiens GN=CPD PE=1 SV=2	2257	Caco2P7_diffgpep1.26023.26023.4	controllerType=0 controllerNumber=1 scan=26023	120.773
27241:4	7	R.LLN[+2262.814]TTDVYLLPSLNPDGFER.A	HexNAc(5)Hex(5)Fuc(1)NeuAc(1)	N[+2263]	1135.76	4	4540.01	4539.99	0	3.8	170	Specific	560.36	499.94	20.15	9.23	78	>sp|O75976|CBPD_HUMAN Carboxypeptidase D OS=Homo sapiens GN=CPD PE=1 SV=2	2257	Caco2P7_diffgpep1.26035.26035.4	controllerType=0 controllerNumber=1 scan=26035	120.826
27261:4	7	R.LLN[+2408.872]TTDVYLLPSLNPDGFER.A	HexNAc(5)Hex(5)Fuc(2)NeuAc(1)	N[+2409]	1172.27	4	4686.06	4686.05	0	2.8	170	Specific	586.56	530.39	18.21	10.53	78	>sp|O75976|CBPD_HUMAN Carboxypeptidase D OS=Homo sapiens GN=CPD PE=1 SV=2	2257	Caco2P7_diffgpep1.26070.26070.4	controllerType=0 controllerNumber=1 scan=26070	120.964
29609:4	7	R.LLVPGTYN[+2262.814]LTVVLTGYMPLTVTNVVVK.E	HexNAc(5)Hex(5)Fuc(1)NeuAc(1)	N[+2263]	1292.63	4	5167.49	5167.47	0	3.8	422	Specific	518.78	436.46	19.41	8.76	78	>sp|O75976|CBPD_HUMAN Carboxypeptidase D OS=Homo sapiens GN=CPD PE=1 SV=2	2257	Caco2P7_diffgpep1.32362.32362.4	controllerType=0 controllerNumber=1 scan=32362	147.36
09721:3	7	R.RFANEYPN[+2262.814]ITR.L	HexNAc(5)Hex(5)Fuc(1)NeuAc(1)	N[+2263]	1215.18	3	3643.53	3643.52	0	2.4	515	Specific	246.06	88.56	88.56	4.54	78	>sp|O75976|CBPD_HUMAN Carboxypeptidase D OS=Homo sapiens GN=CPD PE=1 SV=2	2257	Caco2P7_diffgpep1.10032.10032.3	controllerType=0 controllerNumber=1 scan=10032	47.0704
14223:3	7	R.FANEYPN[+2553.910]ITR.L	HexNAc(5)Hex(5)Fuc(1)NeuAc(2)	N[+2554]	1260.18	3	3778.52	3778.51	0	3.2	516	Specific	352.65	147.77	147.77	5.44	78	>sp|O75976|CBPD_HUMAN Carboxypeptidase D OS=Homo sapiens GN=CPD PE=1 SV=2	2257	Caco2P7_diffgpep1.13856.13856.3	controllerType=0 controllerNumber=1 scan=13856	65.4691
11800:3	7	R.FANEYPN[+2262.814]ITR.L	HexNAc(5)Hex(5)Fuc(1)NeuAc(1)	N[+2263]	1163.14	3	3487.42	3487.42	0	0.9	516	Specific	421.11	187.75	187.75	6.02	78	>sp|O75976|CBPD_HUMAN Carboxypeptidase D OS=Homo sapiens GN=CPD PE=1 SV=2	2257	Caco2P7_diffgpep1.11844.11844.3	controllerType=0 controllerNumber=1 scan=11844	55.7408
07316:3	7	R.N[+2262.814]NSNNFDLNR.N	HexNAc(5)Hex(5)Fuc(1)NeuAc(1)	N[+2263]	1157.46	3	3470.37	3470.36	0	2.7	626	Specific	225.76	81.95	81.95	4.14	78	>sp|O75976|CBPD_HUMAN Carboxypeptidase D OS=Homo sapiens GN=CPD PE=1 SV=2	2257	Caco2P7_diffgpep1.7945.7945.3	controllerType=0 controllerNumber=1 scan=7945	36.9344
07045:3	7	R.N[+1872.651]NSNNFDLNR.N	HexNAc(3)Hex(6)Fuc(0)NeuAc(1)	N[+1873]	1027.4	3	3080.19	3080.2	0	-1.7	626	Specific	227.9	45.72	45.72	2.06	78	>sp|O75976|CBPD_HUMAN Carboxypeptidase D OS=Homo sapiens GN=CPD PE=1 SV=2	2257	Caco2P7_diffgpep1.7728.7728.3	controllerType=0 controllerNumber=1 scan=7728	35.8561
06952:3	7	R.N[+2237.783]NSNNFDLNR.N	HexNAc(4)Hex(7)Fuc(0)NeuAc(1)	N[+2238]	1149.12	3	3445.34	3445.33	0	3.3	626	Specific	229.88	43.09	43.09	2.4	78	>sp|O75976|CBPD_HUMAN Carboxypeptidase D OS=Homo sapiens GN=CPD PE=1 SV=2	2257	Caco2P7_diffgpep1.7655.7655.3	controllerType=0 controllerNumber=1 scan=7655	35.487
07151:3	7	R.N[+2075.730]NSNNFDLNR.N	HexNAc(4)Hex(6)Fuc(0)NeuAc(1)	N[+2076]	1095.1	3	3283.28	3283.27	0	2.8	626	Specific	253.51	54.85	54.85	2.61	78	>sp|O75976|CBPD_HUMAN Carboxypeptidase D OS=Homo sapiens GN=CPD PE=1 SV=2	2257	Caco2P7_diffgpep1.7816.7816.3	controllerType=0 controllerNumber=1 scan=7816	36.2901
18321:3	7	R.GILN[+1971.719]ATISVAEINHPVTTYK.T	HexNAc(5)Hex(5)Fuc(1)NeuAc(0)	N[+1972]	1371.64	3	4112.9	4112.88	0	5.5	808	Specific	214.43	171.94	171.94	3.91	78	>sp|O75976|CBPD_HUMAN Carboxypeptidase D OS=Homo sapiens GN=CPD PE=1 SV=2	2257	Caco2P7_diffgpep1.17108.17108.3	controllerType=0 controllerNumber=1 scan=17108	81.4412
18370:3	7	R.GILN[+1540.529]ATISVAEINHPVTTYK.T	HexNAc(2)Hex(7)Fuc(0)NeuAc(0)	N[+1541]	1227.91	3	3681.72	3681.69	0	8.1	808	Specific	226.46	154.61	154.61	5.06	78	>sp|O75976|CBPD_HUMAN Carboxypeptidase D OS=Homo sapiens GN=CPD PE=1 SV=2	2257	Caco2P7_diffgpep1.17148.17148.3	controllerType=0 controllerNumber=1 scan=17148	81.6351
18314:4	7	R.GILN[+1825.661]ATISVAEINHPVTTYK.T	HexNAc(5)Hex(5)Fuc(0)NeuAc(0)	N[+1826]	992.463	4	3966.83	3966.82	0	2.5	808	Specific	232.02	177.45	177.45	5.45	78	>sp|O75976|CBPD_HUMAN Carboxypeptidase D OS=Homo sapiens GN=CPD PE=1 SV=2	2257	Caco2P7_diffgpep1.17104.17104.4	controllerType=0 controllerNumber=1 scan=17104	81.4195
18387:3	7	R.GILN[+1784.634]ATISVAEINHPVTTYK.T	HexNAc(4)Hex(6)Fuc(0)NeuAc(0)	N[+1785]	1309.27	3	3925.8	3925.79	0	2.4	808	Specific	287.84	194.9	194.9	6.36	78	>sp|O75976|CBPD_HUMAN Carboxypeptidase D OS=Homo sapiens GN=CPD PE=1 SV=2	2257	Caco2P7_diffgpep1.17158.17158.3	controllerType=0 controllerNumber=1 scan=17158	81.6855
18394:3	7	R.GILN[+1825.661]ATISVAEINHPVTTYK.T	HexNAc(5)Hex(5)Fuc(0)NeuAc(0)	N[+1826]	1322.95	3	3966.83	3966.82	0	2.1	808	Specific	315.72	214.76	214.76	6.58	78	>sp|O75976|CBPD_HUMAN Carboxypeptidase D OS=Homo sapiens GN=CPD PE=1 SV=2	2257	Caco2P7_diffgpep1.17166.17166.3	controllerType=0 controllerNumber=1 scan=17166	81.7209
18390:3	7	R.GILN[+1784.634]ATISVAEINHPVTTYK.T	HexNAc(4)Hex(6)Fuc(0)NeuAc(0)	N[+1785]	1309.28	3	3925.82	3925.79	0	5.2	808	Specific	317.09	181.83	181.83	5.99	78	>sp|O75976|CBPD_HUMAN Carboxypeptidase D OS=Homo sapiens GN=CPD PE=1 SV=2	2257	Caco2P7_diffgpep1.17161.17161.3	controllerType=0 controllerNumber=1 scan=17161	81.6979
18513:3	7	R.GILN[+1622.582]ATISVAEINHPVTTYK.T	HexNAc(4)Hex(5)Fuc(0)NeuAc(0)	N[+1623]	1255.26	3	3763.75	3763.74	0	3.1	808	Specific	319.77	224.92	224.92	6.53	78	>sp|O75976|CBPD_HUMAN Carboxypeptidase D OS=Homo sapiens GN=CPD PE=1 SV=2	2257	Caco2P7_diffgpep1.17263.17263.3	controllerType=0 controllerNumber=1 scan=17263	82.2002
18464:4	7	R.GILN[+1784.634]ATISVAEINHPVTTYK.T	HexNAc(4)Hex(6)Fuc(0)NeuAc(0)	N[+1785]	982.207	4	3925.81	3925.79	0	3.5	808	Specific	321.97	217.45	217.45	6.29	78	>sp|O75976|CBPD_HUMAN Carboxypeptidase D OS=Homo sapiens GN=CPD PE=1 SV=2	2257	Caco2P7_diffgpep1.17227.17227.4	controllerType=0 controllerNumber=1 scan=17227	82.0201
18568:3	7	R.GILN[+1622.582]ATISVAEINHPVTTYK.T	HexNAc(4)Hex(5)Fuc(0)NeuAc(0)	N[+1623]	1255.26	3	3763.75	3763.74	0	2.5	808	Specific	346.42	224.3	224.3	6.62	78	>sp|O75976|CBPD_HUMAN Carboxypeptidase D OS=Homo sapiens GN=CPD PE=1 SV=2	2257	Caco2P7_diffgpep1.17304.17304.3	controllerType=0 controllerNumber=1 scan=17304	82.3994
18339:3	7	R.GILN[+1946.687]ATISVAEINHPVTTYK.T	HexNAc(4)Hex(7)Fuc(0)NeuAc(0)	N[+1947]	1363.29	3	4087.85	4087.85	0	1.5	808	Specific	355.55	305.43	305.43	6.98	78	>sp|O75976|CBPD_HUMAN Carboxypeptidase D OS=Homo sapiens GN=CPD PE=1 SV=2	2257	Caco2P7_diffgpep1.17122.17122.3	controllerType=0 controllerNumber=1 scan=17122	81.5095
18364:3	7	R.GILN[+1825.661]ATISVAEINHPVTTYK.T	HexNAc(5)Hex(5)Fuc(0)NeuAc(0)	N[+1826]	1322.95	3	3966.83	3966.82	0	2.9	808	Specific	368.29	296.05	296.05	6.93	78	>sp|O75976|CBPD_HUMAN Carboxypeptidase D OS=Homo sapiens GN=CPD PE=1 SV=2	2257	Caco2P7_diffgpep1.17144.17144.3	controllerType=0 controllerNumber=1 scan=17144	81.6131
18274:3	7	R.GILN[+1864.634]ATISVAEINHPVTTYK.T	HexNAc(2)Hex(9)Fuc(0)NeuAc(0)	N[+1865]	1335.61	3	4004.8	4005.79	-1	2.5	808	Specific	385.98	295.75	295.75	6.91	78	>sp|O75976|CBPD_HUMAN Carboxypeptidase D OS=Homo sapiens GN=CPD PE=1 SV=2	2257	Caco2P7_diffgpep1.17069.17069.3	controllerType=0 controllerNumber=1 scan=17069	81.2489
18286:3	7	R.GILN[+1864.634]ATISVAEINHPVTTYK.T	HexNAc(2)Hex(9)Fuc(0)NeuAc(0)	N[+1865]	1335.95	3	4005.82	4005.79	0	6.7	808	Specific	406.18	318.32	318.32	6.61	78	>sp|O75976|CBPD_HUMAN Carboxypeptidase D OS=Homo sapiens GN=CPD PE=1 SV=2	2257	Caco2P7_diffgpep1.17079.17079.3	controllerType=0 controllerNumber=1 scan=17079	81.2994
18514:3	7	R.GILN[+1216.423]ATISVAEINHPVTTYK.T	HexNAc(2)Hex(5)Fuc(0)NeuAc(0)	N[+1216]	1119.87	3	3357.59	3357.58	0	1.5	808	Specific	509.25	418.24	418.24	9.43	78	>sp|O75976|CBPD_HUMAN Carboxypeptidase D OS=Homo sapiens GN=CPD PE=1 SV=2	2257	Caco2P7_diffgpep1.17264.17264.3	controllerType=0 controllerNumber=1 scan=17264	82.2056
17460:3	7	K.SEGAIQVN[+1540.529]FTLVR.S	HexNAc(2)Hex(7)Fuc(0)NeuAc(0)	N[+1541]	992.108	3	2974.31	2974.3	0	1.7	860	Specific	232.75	39.42	39.42	2.37	78	>sp|O75976|CBPD_HUMAN Carboxypeptidase D OS=Homo sapiens GN=CPD PE=1 SV=2	2257	Caco2P7_diffgpep1.16456.16456.3	controllerType=0 controllerNumber=1 scan=16456	78.2298
20393:4	7	R.GLVMNYPHITN[+1378.476]LTNLGQSTEYR.H	HexNAc(2)Hex(6)Fuc(0)NeuAc(0)	N[+1378]	975.688	4	3899.73	3899.73	0	1.5	945	Specific	357.46	276.81	276.81	6.58	78	>sp|O75976|CBPD_HUMAN Carboxypeptidase D OS=Homo sapiens GN=CPD PE=1 SV=2	2257	Caco2P7_diffgpep1.18779.18779.2	controllerType=0 controllerNumber=1 scan=18779	89.382
20327:3	7	R.GLVMNYPHITN[+1378.476]LTNLGQSTEYR.H	HexNAc(2)Hex(6)Fuc(0)NeuAc(0)	N[+1378]	1300.58	3	3899.74	3899.73	0	2.8	945	Specific	605	494.69	494.69	11.98	78	>sp|O75976|CBPD_HUMAN Carboxypeptidase D OS=Homo sapiens GN=CPD PE=1 SV=2	2257	Caco2P7_diffgpep1.18725.18725.3	controllerType=0 controllerNumber=1 scan=18725	89.1091
20397:3	7	R.GLVMNYPHITN[+1378.476]LTNLGQSTEYR.H	HexNAc(2)Hex(6)Fuc(0)NeuAc(0)	N[+1378]	1300.58	3	3899.73	3899.73	0	0.7	945	Specific	641.12	533.4	533.4	12	78	>sp|O75976|CBPD_HUMAN Carboxypeptidase D OS=Homo sapiens GN=CPD PE=1 SV=2	2257	Caco2P7_diffgpep1.18783.18783.3	controllerType=0 controllerNumber=1 scan=18783	89.4
15043:4	7	R.HIWSLEISNKPN[+2100.761]VSEPEEPK.I	HexNAc(5)Hex(4)Fuc(1)NeuAc(1)	N[+2101]	1109.24	4	4433.94	4433.94	0	1.4	967	Specific	102.89	98.71	30.63	2.18	78	>sp|O75976|CBPD_HUMAN Carboxypeptidase D OS=Homo sapiens GN=CPD PE=1 SV=2	2257	Caco2P7_diffgpep1.14548.14548.4	controllerType=0 controllerNumber=1 scan=14548	68.8592
14918:4	7	R.HIWSLEISNKPN[+2059.735]VSEPEEPK.I	HexNAc(4)Hex(5)Fuc(1)NeuAc(1)	N[+2060]	1098.99	4	4392.93	4392.91	0	3.1	967	Specific	149.09	111.85	19.39	3.23	78	>sp|O75976|CBPD_HUMAN Carboxypeptidase D OS=Homo sapiens GN=CPD PE=1 SV=2	2257	Caco2P7_diffgpep1.14445.14445.4	controllerType=0 controllerNumber=1 scan=14445	68.3519
14850:4	7	R.HIWSLEISNKPN[+2262.814]VSEPEEPK.I	HexNAc(5)Hex(5)Fuc(1)NeuAc(1)	N[+2263]	1149.76	4	4596.01	4595.99	0	3.7	967	Specific	179.62	154.1	18.64	4.24	78	>sp|O75976|CBPD_HUMAN Carboxypeptidase D OS=Homo sapiens GN=CPD PE=1 SV=2	2257	Caco2P7_diffgpep1.14386.14386.3	controllerType=0 controllerNumber=1 scan=14386	68.0749
13495:4	7	R.HIWSLEISNKPN[+2117.777]VSEPEEPK.I	HexNAc(5)Hex(5)Fuc(2)NeuAc(0)	N[+2118]	1113.5	4	4450.99	4450.95	0	8.2	967	Specific	204.75	197.46	197.46	3.97	78	>sp|O75976|CBPD_HUMAN Carboxypeptidase D OS=Homo sapiens GN=CPD PE=1 SV=2	2257	Caco2P7_diffgpep1.13270.13270.4	controllerType=0 controllerNumber=1 scan=13270	62.5725
15049:4	7	R.HIWSLEISNKPN[+2262.814]VSEPEEPK.I	HexNAc(5)Hex(5)Fuc(1)NeuAc(1)	N[+2263]	1149.75	4	4595.99	4595.99	0	-0.1	967	Specific	207.84	147.26	34.26	4.05	78	>sp|O75976|CBPD_HUMAN Carboxypeptidase D OS=Homo sapiens GN=CPD PE=1 SV=2	2257	Caco2P7_diffgpep1.14553.14553.4	controllerType=0 controllerNumber=1 scan=14553	68.8863
14875:4	7	R.HIWSLEISNKPN[+2424.867]VSEPEEPK.I	HexNAc(5)Hex(6)Fuc(1)NeuAc(1)	N[+2425]	1190.27	4	4758.06	4758.04	0	3.2	967	Specific	238.9	184.45	19.34	5.87	78	>sp|O75976|CBPD_HUMAN Carboxypeptidase D OS=Homo sapiens GN=CPD PE=1 SV=2	2257	Caco2P7_diffgpep1.14408.14408.4	controllerType=0 controllerNumber=1 scan=14408	68.1784
13482:4	7	R.HIWSLEISNKPN[+2320.856]VSEPEEPK.I	HexNAc(6)Hex(5)Fuc(2)NeuAc(0)	N[+2321]	1164.26	4	4654.03	4654.03	0	-1.1	967	Specific	295.84	238.67	18.29	5.9	78	>sp|O75976|CBPD_HUMAN Carboxypeptidase D OS=Homo sapiens GN=CPD PE=1 SV=2	2257	Caco2P7_diffgpep1.13259.13259.4	controllerType=0 controllerNumber=1 scan=13259	62.5199
13555:4	7	R.HIWSLEISNKPN[+1809.666]VSEPEEPK.I	HexNAc(5)Hex(4)Fuc(1)NeuAc(0)	N[+1810]	1036.47	4	4142.84	4142.84	0	0.3	967	Specific	321.4	190.74	190.74	6.57	78	>sp|O75976|CBPD_HUMAN Carboxypeptidase D OS=Homo sapiens GN=CPD PE=1 SV=2	2257	Caco2P7_diffgpep1.13317.13317.4	controllerType=0 controllerNumber=1 scan=13317	62.8099
14738:4	7	R.HIWSLEISNKPN[+2772.984]VSEPEEPK.I	HexNAc(6)Hex(6)Fuc(0)NeuAc(2)	N[+2773]	1277.04	4	5105.16	5106.16	-1	-0.1	967	Specific	376.19	272.91	272.91	6.54	78	>sp|O75976|CBPD_HUMAN Carboxypeptidase D OS=Homo sapiens GN=CPD PE=1 SV=2	2257	Caco2P7_diffgpep1.14291.14291.2	controllerType=0 controllerNumber=1 scan=14291	67.5986
13380:4	7	R.HIWSLEISNKPN[+2336.851]VSEPEEPK.I	HexNAc(6)Hex(6)Fuc(1)NeuAc(0)	N[+2337]	1168.27	4	4670.04	4670.03	0	2.8	967	Specific	383.16	265.92	265.92	6.81	78	>sp|O75976|CBPD_HUMAN Carboxypeptidase D OS=Homo sapiens GN=CPD PE=1 SV=2	2257	Caco2P7_diffgpep1.13178.13178.4	controllerType=0 controllerNumber=1 scan=13178	62.1133
14752:4	7	R.HIWSLEISNKPN[+2774.004]VSEPEEPK.I	HexNAc(6)Hex(6)Fuc(2)NeuAc(1)	N[+2774]	1277.3	4	5106.19	5107.18	-1	1.6	967	Specific	427.03	379.78	53.24	7.77	78	>sp|O75976|CBPD_HUMAN Carboxypeptidase D OS=Homo sapiens GN=CPD PE=1 SV=2	2257	Caco2P7_diffgpep1.14304.14304.4	controllerType=0 controllerNumber=1 scan=14304	67.6651
13418:4	7	R.HIWSLEISNKPN[+2336.851]VSEPEEPK.I	HexNAc(6)Hex(6)Fuc(1)NeuAc(0)	N[+2337]	1168.26	4	4670.04	4670.03	0	1.5	967	Specific	472.19	235.73	235.73	7.16	78	>sp|O75976|CBPD_HUMAN Carboxypeptidase D OS=Homo sapiens GN=CPD PE=1 SV=2	2257	Caco2P7_diffgpep1.13207.13207.4	controllerType=0 controllerNumber=1 scan=13207	62.26
14829:4	7	R.HIWSLEISNKPN[+2774.004]VSEPEEPK.I	HexNAc(6)Hex(6)Fuc(2)NeuAc(1)	N[+2774]	1277.55	4	5107.2	5107.18	0	2.8	967	Specific	498.04	323.54	23.55	7.5	78	>sp|O75976|CBPD_HUMAN Carboxypeptidase D OS=Homo sapiens GN=CPD PE=1 SV=2	2257	Caco2P7_diffgpep1.14368.14368.4	controllerType=0 controllerNumber=1 scan=14368	67.985
13337:4	7	R.HIWSLEISNKPN[+2627.947]VSEPEEPK.I	HexNAc(6)Hex(6)Fuc(1)NeuAc(1)	N[+2628]	1241.04	4	4961.14	4961.12	0	3.2	967	Specific	499.2	342.44	12.52	7.64	78	>sp|O75976|CBPD_HUMAN Carboxypeptidase D OS=Homo sapiens GN=CPD PE=1 SV=2	2257	Caco2P7_diffgpep1.13147.13147.4	controllerType=0 controllerNumber=1 scan=13147	61.9435
13455:4	7	R.HIWSLEISNKPN[+1971.719]VSEPEEPK.I	HexNAc(5)Hex(5)Fuc(1)NeuAc(0)	N[+1972]	1076.98	4	4304.91	4304.9	0	3.5	967	Specific	533.18	399.03	399.03	9.37	78	>sp|O75976|CBPD_HUMAN Carboxypeptidase D OS=Homo sapiens GN=CPD PE=1 SV=2	2257	Caco2P7_diffgpep1.13237.13237.4	controllerType=0 controllerNumber=1 scan=13237	62.4114
14902:4	7	R.HIWSLEISNKPN[+2262.814]VSEPEEPK.I	HexNAc(5)Hex(5)Fuc(1)NeuAc(1)	N[+2263]	1149.76	4	4596	4595.99	0	1.9	967	Specific	761.8	537.35	26.38	15.12	78	>sp|O75976|CBPD_HUMAN Carboxypeptidase D OS=Homo sapiens GN=CPD PE=1 SV=2	2257	Caco2P7_diffgpep1.14432.14432.4	controllerType=0 controllerNumber=1 scan=14432	68.2889
07237:3	7	R.GKDLDTDFTNN[+1768.640]ASQPETK.A	HexNAc(4)Hex(5)Fuc(1)NeuAc(0)	N[+1769]	1250.53	3	3749.56	3749.55	0	2.9	1060	Specific	153.33	76.31	76.31	2.06	78	>sp|O75976|CBPD_HUMAN Carboxypeptidase D OS=Homo sapiens GN=CPD PE=1 SV=2	2257	Caco2P7_diffgpep1.7882.7882.3	controllerType=0 controllerNumber=1 scan=7882	36.6241
07529:3	7	R.GKDLDTDFTNN[+1606.587]ASQPETK.A	HexNAc(4)Hex(4)Fuc(1)NeuAc(0)	N[+1607]	1196.51	3	3587.52	3587.5	0	4.5	1060	Specific	167.93	106.6	106.6	2.24	78	>sp|O75976|CBPD_HUMAN Carboxypeptidase D OS=Homo sapiens GN=CPD PE=1 SV=2	2257	Caco2P7_diffgpep1.8121.8121.3	controllerType=0 controllerNumber=1 scan=8121	37.8085
08709:3	7	R.GKDLDTDFTNN[+2262.814]ASQPETK.A	HexNAc(5)Hex(5)Fuc(1)NeuAc(1)	N[+2263]	1414.92	3	4242.74	4243.73	-1	2.3	1060	Specific	183.39	122.6	122.6	2.6	78	>sp|O75976|CBPD_HUMAN Carboxypeptidase D OS=Homo sapiens GN=CPD PE=1 SV=2	2257	Caco2P7_diffgpep1.9187.9187.3	controllerType=0 controllerNumber=1 scan=9187	42.9159
07346:3	7	R.GKDLDTDFTNN[+1930.692]ASQPETK.A	HexNAc(4)Hex(6)Fuc(1)NeuAc(0)	N[+1931]	1304.55	3	3911.63	3911.61	0	4.8	1060	Specific	190	73.92	73.92	2.01	78	>sp|O75976|CBPD_HUMAN Carboxypeptidase D OS=Homo sapiens GN=CPD PE=1 SV=2	2257	Caco2P7_diffgpep1.7969.7969.3	controllerType=0 controllerNumber=1 scan=7969	37.0567
08604:4	7	R.GKDLDTDFTNN[+2262.814]ASQPETK.A	HexNAc(5)Hex(5)Fuc(1)NeuAc(1)	N[+2263]	1061.94	4	4244.74	4243.73	1	2.1	1060	Specific	195.1	138.24	24.83	2.44	78	>sp|O75976|CBPD_HUMAN Carboxypeptidase D OS=Homo sapiens GN=CPD PE=1 SV=2	2257	Caco2P7_diffgpep1.9097.9097.4	controllerType=0 controllerNumber=1 scan=9097	42.4724
07363:3	7	R.GKDLDTDFTNN[+2116.756]ASQPETK.A	HexNAc(5)Hex(5)Fuc(0)NeuAc(1)	N[+2117]	1366.9	3	4098.69	4097.67	1	4	1060	Specific	200.85	133.3	20.41	2.57	78	>sp|O75976|CBPD_HUMAN Carboxypeptidase D OS=Homo sapiens GN=CPD PE=1 SV=2	2257	Caco2P7_diffgpep1.7984.7984.3	controllerType=0 controllerNumber=1 scan=7984	37.13
07438:3	7	R.GKDLDTDFTNN[+2117.777]ASQPETK.A	HexNAc(5)Hex(5)Fuc(2)NeuAc(0)	N[+2118]	1366.91	3	4098.73	4098.69	0	8.3	1060	Specific	210.69	105.74	105.74	2.05	78	>sp|O75976|CBPD_HUMAN Carboxypeptidase D OS=Homo sapiens GN=CPD PE=1 SV=2	2257	Caco2P7_diffgpep1.8047.8047.3	controllerType=0 controllerNumber=1 scan=8047	37.4452
07422:3	7	R.GKDLDTDFTNN[+1768.640]ASQPETK.A	HexNAc(4)Hex(5)Fuc(1)NeuAc(0)	N[+1769]	1250.52	3	3749.56	3749.55	0	0.5	1060	Specific	251.05	157.91	157.91	5.46	78	>sp|O75976|CBPD_HUMAN Carboxypeptidase D OS=Homo sapiens GN=CPD PE=1 SV=2	2257	Caco2P7_diffgpep1.8033.8033.3	controllerType=0 controllerNumber=1 scan=8033	37.3751
08612:4	7	R.GKDLDTDFTNN[+2262.814]ASQPETK.A	HexNAc(5)Hex(5)Fuc(1)NeuAc(1)	N[+2263]	1061.69	4	4243.73	4243.73	0	0.7	1060	Specific	287.85	186.52	30.24	5.75	78	>sp|O75976|CBPD_HUMAN Carboxypeptidase D OS=Homo sapiens GN=CPD PE=1 SV=2	2257	Caco2P7_diffgpep1.9106.9106.4	controllerType=0 controllerNumber=1 scan=9106	42.5126
06900:3	7	R.GKDLDTDFTNN[+1864.634]ASQPETK.A	HexNAc(2)Hex(9)Fuc(0)NeuAc(0)	N[+1865]	1282.52	3	3845.55	3845.55	0	1.1	1060	Specific	321.62	208.44	208.44	6.2	78	>sp|O75976|CBPD_HUMAN Carboxypeptidase D OS=Homo sapiens GN=CPD PE=1 SV=2	2257	Caco2P7_diffgpep1.7616.7616.3	controllerType=0 controllerNumber=1 scan=7616	35.2953
07405:4	7	R.GKDLDTDFTNN[+1971.719]ASQPETK.A	HexNAc(5)Hex(5)Fuc(1)NeuAc(0)	N[+1972]	988.916	4	3952.64	3952.63	0	2.5	1060	Specific	343.96	238.71	238.71	6	78	>sp|O75976|CBPD_HUMAN Carboxypeptidase D OS=Homo sapiens GN=CPD PE=1 SV=2	2257	Caco2P7_diffgpep1.8018.8018.4	controllerType=0 controllerNumber=1 scan=8018	37.2983
08635:4	7	R.GKDLDTDFTNN[+2262.814]ASQPETK.A	HexNAc(5)Hex(5)Fuc(1)NeuAc(1)	N[+2263]	1061.69	4	4243.74	4243.73	0	1.6	1060	Specific	419.99	282.24	27.94	6.61	78	>sp|O75976|CBPD_HUMAN Carboxypeptidase D OS=Homo sapiens GN=CPD PE=1 SV=2	2257	Caco2P7_diffgpep1.9126.9126.4	controllerType=0 controllerNumber=1 scan=9126	42.6087
08647:3	7	R.GKDLDTDFTNN[+2262.814]ASQPETK.A	HexNAc(5)Hex(5)Fuc(1)NeuAc(1)	N[+2263]	1415.25	3	4243.74	4243.73	0	2.6	1060	Specific	431.79	266.82	52.52	6.63	78	>sp|O75976|CBPD_HUMAN Carboxypeptidase D OS=Homo sapiens GN=CPD PE=1 SV=2	2257	Caco2P7_diffgpep1.9138.9138.3	controllerType=0 controllerNumber=1 scan=9138	42.6699
07381:3	7	R.GKDLDTDFTNN[+1971.719]ASQPETK.A	HexNAc(5)Hex(5)Fuc(1)NeuAc(0)	N[+1972]	1318.22	3	3952.64	3952.63	0	2.1	1060	Specific	644.89	472.33	472.33	11.74	78	>sp|O75976|CBPD_HUMAN Carboxypeptidase D OS=Homo sapiens GN=CPD PE=1 SV=2	2257	Caco2P7_diffgpep1.7998.7998.3	controllerType=0 controllerNumber=1 scan=7998	37.1976
12300:3	7	K.DLDTDFTNN[+2262.814]ASQPETK.A	HexNAc(5)Hex(5)Fuc(1)NeuAc(1)	N[+2263]	1353.21	3	4057.61	4058.61	-1	0.9	1062	Specific	350.39	225.47	225.47	6.45	78	>sp|O75976|CBPD_HUMAN Carboxypeptidase D OS=Homo sapiens GN=CPD PE=1 SV=2	2257	Caco2P7_diffgpep1.12297.12297.3	controllerType=0 controllerNumber=1 scan=12297	57.8468
10592:3	7	K.DLDTDFTNN[+1971.719]ASQPETK.A	HexNAc(5)Hex(5)Fuc(1)NeuAc(0)	N[+1972]	1256.51	3	3767.53	3767.52	0	2.9	1062	Specific	424.87	266.68	266.68	6.84	78	>sp|O75976|CBPD_HUMAN Carboxypeptidase D OS=Homo sapiens GN=CPD PE=1 SV=2	2257	Caco2P7_diffgpep1.10760.10760.3	controllerType=0 controllerNumber=1 scan=10760	50.6265
26084:5	8	K.TILPAAAQDVYYRDEIGN[+1540.529]VSTSHLLILDDSVEMEIRPR.F	HexNAc(2)Hex(7)Fuc(0)NeuAc(0)	N[+1541]	1168.95	5	5840.74	5840.72	0	3.3	282	Specific	81.85	81.85	81.85	2.01	30	>sp|P04843|RPN1_HUMAN Dolichyl-diphosphooligosaccharide--protein glycosyltransferase subunit 1 OS=Homo sapiens GN=RPN1 PE=1 SV=1	14885	Caco2P7_diffgpep1.24466.24466.5	controllerType=0 controllerNumber=1 scan=24466	114.39
26074:5	8	K.TILPAAAQDVYYRDEIGN[+1540.529]VSTSHLLILDDSVEMEIRPR.F	HexNAc(2)Hex(7)Fuc(0)NeuAc(0)	N[+1541]	1168.96	5	5840.76	5840.72	0	6.7	282	Specific	214.33	165.48	165.48	2.05	30	>sp|P04843|RPN1_HUMAN Dolichyl-diphosphooligosaccharide--protein glycosyltransferase subunit 1 OS=Homo sapiens GN=RPN1 PE=1 SV=1	14885	Caco2P7_diffgpep1.24457.24457.5	controllerType=0 controllerNumber=1 scan=24457	114.352
25889:5	8	K.TILPAAAQDVYYRDEIGN[+1864.634]VSTSHLLILDDSVEMEIRPR.F	HexNAc(2)Hex(9)Fuc(0)NeuAc(0)	N[+1865]	1233.78	5	6164.86	6164.83	0	5	282	Specific	264.91	203.21	203.21	6.03	30	>sp|P04843|RPN1_HUMAN Dolichyl-diphosphooligosaccharide--protein glycosyltransferase subunit 1 OS=Homo sapiens GN=RPN1 PE=1 SV=1	14885	Caco2P7_diffgpep1.24268.24268.5	controllerType=0 controllerNumber=1 scan=24268	113.554
26090:5	8	K.TILPAAAQDVYYRDEIGN[+1378.476]VSTSHLLILDDSVEMEIRPR.F	HexNAc(2)Hex(6)Fuc(0)NeuAc(0)	N[+1378]	1136.34	5	5677.68	5678.67	-1	1.9	282	Specific	362.73	356.78	356.78	7.38	30	>sp|P04843|RPN1_HUMAN Dolichyl-diphosphooligosaccharide--protein glycosyltransferase subunit 1 OS=Homo sapiens GN=RPN1 PE=1 SV=1	14885	Caco2P7_diffgpep1.24472.24472.5	controllerType=0 controllerNumber=1 scan=24472	114.415
25876:5	8	K.TILPAAAQDVYYRDEIGN[+1864.634]VSTSHLLILDDSVEMEIRPR.F	HexNAc(2)Hex(9)Fuc(0)NeuAc(0)	N[+1865]	1233.78	5	6164.85	6164.83	0	4.4	282	Specific	363.59	349.13	349.13	6.94	30	>sp|P04843|RPN1_HUMAN Dolichyl-diphosphooligosaccharide--protein glycosyltransferase subunit 1 OS=Homo sapiens GN=RPN1 PE=1 SV=1	14885	Caco2P7_diffgpep1.24251.24251.5	controllerType=0 controllerNumber=1 scan=24251	113.482
26024:5	8	K.TILPAAAQDVYYRDEIGN[+1540.529]VSTSHLLILDDSVEMEIRPR.F	HexNAc(2)Hex(7)Fuc(0)NeuAc(0)	N[+1541]	1168.75	5	5839.73	5840.72	-1	1.9	282	Specific	390.28	261.2	261.2	6.94	30	>sp|P04843|RPN1_HUMAN Dolichyl-diphosphooligosaccharide--protein glycosyltransferase subunit 1 OS=Homo sapiens GN=RPN1 PE=1 SV=1	14885	Caco2P7_diffgpep1.24413.24413.5	controllerType=0 controllerNumber=1 scan=24413	114.16
25906:5	8	K.TILPAAAQDVYYRDEIGN[+1378.476]VSTSHLLILDDSVEMEIRPR.F	HexNAc(2)Hex(6)Fuc(0)NeuAc(0)	N[+1378]	1136.34	5	5677.67	5678.67	-1	1.1	282	Specific	554.45	506.99	506.99	9.57	30	>sp|P04843|RPN1_HUMAN Dolichyl-diphosphooligosaccharide--protein glycosyltransferase subunit 1 OS=Homo sapiens GN=RPN1 PE=1 SV=1	14885	Caco2P7_diffgpep1.24287.24287.5	controllerType=0 controllerNumber=1 scan=24287	113.638
25877:5	8	K.TILPAAAQDVYYRDEIGN[+1702.581]VSTSHLLILDDSVEMEIRPR.F	HexNAc(2)Hex(8)Fuc(0)NeuAc(0)	N[+1703]	1201.36	5	6002.77	6002.77	0	-0.3	282	Specific	610.96	488.16	488.16	11.75	30	>sp|P04843|RPN1_HUMAN Dolichyl-diphosphooligosaccharide--protein glycosyltransferase subunit 1 OS=Homo sapiens GN=RPN1 PE=1 SV=1	14885	Caco2P7_diffgpep1.24254.24254.5	controllerType=0 controllerNumber=1 scan=24254	113.493
25887:5	8	K.TILPAAAQDVYYRDEIGN[+1540.529]VSTSHLLILDDSVEMEIRPR.F	HexNAc(2)Hex(7)Fuc(0)NeuAc(0)	N[+1541]	1168.96	5	5840.75	5840.72	0	5.9	282	Specific	635.57	551.11	551.11	11.54	30	>sp|P04843|RPN1_HUMAN Dolichyl-diphosphooligosaccharide--protein glycosyltransferase subunit 1 OS=Homo sapiens GN=RPN1 PE=1 SV=1	14885	Caco2P7_diffgpep1.24267.24267.5	controllerType=0 controllerNumber=1 scan=24267	113.548
25898:5	8	K.TILPAAAQDVYYRDEIGN[+1540.529]VSTSHLLILDDSVEMEIRPR.F	HexNAc(2)Hex(7)Fuc(0)NeuAc(0)	N[+1541]	1168.95	5	5840.74	5840.72	0	3.8	282	Specific	727.43	492.74	492.74	13.96	30	>sp|P04843|RPN1_HUMAN Dolichyl-diphosphooligosaccharide--protein glycosyltransferase subunit 1 OS=Homo sapiens GN=RPN1 PE=1 SV=1	14885	Caco2P7_diffgpep1.24279.24279.5	controllerType=0 controllerNumber=1 scan=24279	113.602
23054:4	8	R.DEIGN[+1702.581]VSTSHLLILDDSVEMEIRPR.F	HexNAc(2)Hex(8)Fuc(0)NeuAc(0)	N[+1703]	1136.02	4	4541.04	4541.01	0	6.5	295	Specific	289.94	137.06	137.06	5.46	30	>sp|P04843|RPN1_HUMAN Dolichyl-diphosphooligosaccharide--protein glycosyltransferase subunit 1 OS=Homo sapiens GN=RPN1 PE=1 SV=1	14885	Caco2P7_diffgpep1.21064.21064.4	controllerType=0 controllerNumber=1 scan=21064	99.818
22927:4	8	R.DEIGN[+1864.634]VSTSHLLILDDSVEMEIRPR.F	HexNAc(2)Hex(9)Fuc(0)NeuAc(0)	N[+1865]	1176.27	4	4702.07	4703.06	-1	1.2	295	Specific	339.44	116.39	116.39	6.08	30	>sp|P04843|RPN1_HUMAN Dolichyl-diphosphooligosaccharide--protein glycosyltransferase subunit 1 OS=Homo sapiens GN=RPN1 PE=1 SV=1	14885	Caco2P7_diffgpep1.20962.20962.4	controllerType=0 controllerNumber=1 scan=20962	99.3243
22928:4	8	R.DEIGN[+1866.688]VSTSHLLILDDSVEMEIRPR.F	HexNAc(6)Hex(4)Fuc(0)NeuAc(0)	N[+1867]	1176.78	4	4704.12	4705.12	-1	0.3	295	Specific	341.61	120.82	120.82	6.15	30	>sp|P04843|RPN1_HUMAN Dolichyl-diphosphooligosaccharide--protein glycosyltransferase subunit 1 OS=Homo sapiens GN=RPN1 PE=1 SV=1	14885	Caco2P7_diffgpep1.20962.20962.4	controllerType=0 controllerNumber=1 scan=20962	99.3243
23359:4	8	R.DEIGN[+1378.476]VSTSHLLILDDSVEMEIRPR.F	HexNAc(2)Hex(6)Fuc(0)NeuAc(0)	N[+1378]	1054.98	4	4216.91	4216.91	0	1.2	295	Specific	359.68	213.34	213.34	6.79	30	>sp|P04843|RPN1_HUMAN Dolichyl-diphosphooligosaccharide--protein glycosyltransferase subunit 1 OS=Homo sapiens GN=RPN1 PE=1 SV=1	14885	Caco2P7_diffgpep1.21316.21316.4	controllerType=0 controllerNumber=1 scan=21316	101.011
22901:4	8	R.DEIGN[+1864.634]VSTSHLLILDDSVEMEIRPR.F	HexNAc(2)Hex(9)Fuc(0)NeuAc(0)	N[+1865]	1176.53	4	4703.09	4703.06	0	5.8	295	Specific	368.82	196.34	196.34	6.31	30	>sp|P04843|RPN1_HUMAN Dolichyl-diphosphooligosaccharide--protein glycosyltransferase subunit 1 OS=Homo sapiens GN=RPN1 PE=1 SV=1	14885	Caco2P7_diffgpep1.20940.20940.4	controllerType=0 controllerNumber=1 scan=20940	99.2231
23091:4	8	R.DEIGN[+1540.529]VSTSHLLILDDSVEMEIRPR.F	HexNAc(2)Hex(7)Fuc(0)NeuAc(0)	N[+1541]	1095.5	4	4378.96	4378.96	0	1	295	Specific	395.87	165.56	165.56	6.6	30	>sp|P04843|RPN1_HUMAN Dolichyl-diphosphooligosaccharide--protein glycosyltransferase subunit 1 OS=Homo sapiens GN=RPN1 PE=1 SV=1	14885	Caco2P7_diffgpep1.21093.21093.4	controllerType=0 controllerNumber=1 scan=21093	99.9592
23374:4	8	R.DEIGN[+1378.476]VSTSHLLILDDSVEMEIRPR.F	HexNAc(2)Hex(6)Fuc(0)NeuAc(0)	N[+1378]	1054.99	4	4216.93	4216.91	0	5.2	295	Specific	424.55	245.01	245.01	6.76	30	>sp|P04843|RPN1_HUMAN Dolichyl-diphosphooligosaccharide--protein glycosyltransferase subunit 1 OS=Homo sapiens GN=RPN1 PE=1 SV=1	14885	Caco2P7_diffgpep1.21331.21331.4	controllerType=0 controllerNumber=1 scan=21331	101.073
23270:4	8	R.DEIGN[+1378.476]VSTSHLLILDDSVEMEIRPR.F	HexNAc(2)Hex(6)Fuc(0)NeuAc(0)	N[+1378]	1054.99	4	4216.93	4216.91	0	5.7	295	Specific	462.93	242.09	242.09	6.71	30	>sp|P04843|RPN1_HUMAN Dolichyl-diphosphooligosaccharide--protein glycosyltransferase subunit 1 OS=Homo sapiens GN=RPN1 PE=1 SV=1	14885	Caco2P7_diffgpep1.21242.21242.4	controllerType=0 controllerNumber=1 scan=21242	100.674
22907:4	8	R.DEIGN[+1540.529]VSTSHLLILDDSVEMEIRPR.F	HexNAc(2)Hex(7)Fuc(0)NeuAc(0)	N[+1541]	1095.5	4	4378.96	4378.96	0	0.6	295	Specific	548.76	284.72	284.72	7.79	30	>sp|P04843|RPN1_HUMAN Dolichyl-diphosphooligosaccharide--protein glycosyltransferase subunit 1 OS=Homo sapiens GN=RPN1 PE=1 SV=1	14885	Caco2P7_diffgpep1.20947.20947.4	controllerType=0 controllerNumber=1 scan=20947	99.253
23087:4	8	R.DEIGN[+1378.476]VSTSHLLILDDSVEMEIRPR.F	HexNAc(2)Hex(6)Fuc(0)NeuAc(0)	N[+1378]	1054.98	4	4216.91	4216.91	0	1	295	Specific	872.41	606.55	606.55	17.11	30	>sp|P04843|RPN1_HUMAN Dolichyl-diphosphooligosaccharide--protein glycosyltransferase subunit 1 OS=Homo sapiens GN=RPN1 PE=1 SV=1	14885	Caco2P7_diffgpep1.21090.21090.4	controllerType=0 controllerNumber=1 scan=21090	99.9427
22826:4	8	R.DEIGN[+1702.581]VSTSHLLILDDSVEMEIRPR.F	HexNAc(2)Hex(8)Fuc(0)NeuAc(0)	N[+1703]	1136.01	4	4541.03	4541.01	0	3.6	295	Specific	881.4	690.69	690.69	17.07	30	>sp|P04843|RPN1_HUMAN Dolichyl-diphosphooligosaccharide--protein glycosyltransferase subunit 1 OS=Homo sapiens GN=RPN1 PE=1 SV=1	14885	Caco2P7_diffgpep1.20874.20874.4	controllerType=0 controllerNumber=1 scan=20874	98.9329
22921:4	8	R.DEIGN[+1378.476]VSTSHLLILDDSVEMEIRPR.F	HexNAc(2)Hex(6)Fuc(0)NeuAc(0)	N[+1378]	1054.98	4	4216.92	4216.91	0	2.8	295	Specific	881.61	626.19	626.19	17.1	30	>sp|P04843|RPN1_HUMAN Dolichyl-diphosphooligosaccharide--protein glycosyltransferase subunit 1 OS=Homo sapiens GN=RPN1 PE=1 SV=1	14885	Caco2P7_diffgpep1.20958.20958.4	controllerType=0 controllerNumber=1 scan=20958	99.3023
23024:4	8	R.DEIGN[+1216.423]VSTSHLLILDDSVEMEIRPR.F	HexNAc(2)Hex(5)Fuc(0)NeuAc(0)	N[+1216]	1014.47	4	4054.86	4054.85	0	1.9	295	Specific	981.54	702.7	702.7	19.23	30	>sp|P04843|RPN1_HUMAN Dolichyl-diphosphooligosaccharide--protein glycosyltransferase subunit 1 OS=Homo sapiens GN=RPN1 PE=1 SV=1	14885	Caco2P7_diffgpep1.21043.21043.4	controllerType=0 controllerNumber=1 scan=21043	99.7156
14038:4	9	K.KQDTPQYN[+1955.724]LTIEVSDKDFK.T	HexNAc(5)Hex(4)Fuc(2)NeuAc(0)	N[+1956]	1056.97	4	4224.87	4224.86	0	3.1	412	Specific	162.56	144.04	32.02	2.06	78	>sp|Q12864|CAD17_HUMAN Cadherin-17 OS=Homo sapiens GN=CDH17 PE=2 SV=3	2038	Caco2P7_diffgpep1.13707.13707.4	controllerType=0 controllerNumber=1 scan=13707	64.7592
15572:4	9	K.KQDTPQYN[+2408.872]LTIEVSDKDFK.T	HexNAc(5)Hex(5)Fuc(2)NeuAc(1)	N[+2409]	1170.26	4	4678	4678.01	0	-1.1	412	Specific	221.02	140.69	15.01	4.73	78	>sp|Q12864|CAD17_HUMAN Cadherin-17 OS=Homo sapiens GN=CDH17 PE=2 SV=3	2038	Caco2P7_diffgpep1.14968.14968.4	controllerType=0 controllerNumber=1 scan=14968	70.8785
14125:4	9	K.KQDTPQYN[+1825.661]LTIEVSDKDFK.T	HexNAc(5)Hex(5)Fuc(0)NeuAc(0)	N[+1826]	1024.21	4	4093.81	4094.8	-1	4.7	412	Specific	226.2	119.84	119.84	4.46	78	>sp|Q12864|CAD17_HUMAN Cadherin-17 OS=Homo sapiens GN=CDH17 PE=2 SV=3	2038	Caco2P7_diffgpep1.13773.13773.4	controllerType=0 controllerNumber=1 scan=13773	65.0812
15713:4	9	K.KQDTPQYN[+2116.756]LTIEVSDKDFK.T	HexNAc(5)Hex(5)Fuc(0)NeuAc(1)	N[+2117]	1097.23	4	4385.89	4385.89	0	0.5	412	Specific	235.58	149.29	49.59	5.27	78	>sp|Q12864|CAD17_HUMAN Cadherin-17 OS=Homo sapiens GN=CDH17 PE=2 SV=3	2038	Caco2P7_diffgpep1.15075.15075.4	controllerType=0 controllerNumber=1 scan=15075	71.3969
13875:4	9	K.KQDTPQYN[+2627.947]LTIEVSDKDFK.T	HexNAc(6)Hex(6)Fuc(1)NeuAc(1)	N[+2628]	1225.28	4	4898.11	4897.08	1	4.6	412	Specific	253.35	146.22	20.4	5.12	78	>sp|Q12864|CAD17_HUMAN Cadherin-17 OS=Homo sapiens GN=CDH17 PE=2 SV=3	2038	Caco2P7_diffgpep1.13574.13574.4	controllerType=0 controllerNumber=1 scan=13574	64.0926
17547:4	9	K.KQDTPQYN[+3065.100]LTIEVSDKDFK.T	HexNAc(6)Hex(6)Fuc(2)NeuAc(2)	N[+3065]	1334.07	4	5333.25	5334.23	-1	4.3	412	Specific	292.06	238.7	21.39	5.72	78	>sp|Q12864|CAD17_HUMAN Cadherin-17 OS=Homo sapiens GN=CDH17 PE=2 SV=3	2038	Caco2P7_diffgpep1.16520.16520.4	controllerType=0 controllerNumber=1 scan=16520	78.5514
17493:4	9	K.KQDTPQYN[+2919.042]LTIEVSDKDFK.T	HexNAc(6)Hex(6)Fuc(1)NeuAc(2)	N[+2919]	1297.55	4	5187.18	5188.18	-1	1.6	412	Specific	301.46	187.78	187.78	6.18	78	>sp|Q12864|CAD17_HUMAN Cadherin-17 OS=Homo sapiens GN=CDH17 PE=2 SV=3	2038	Caco2P7_diffgpep1.16479.16479.4	controllerType=0 controllerNumber=1 scan=16479	78.3479
13975:4	9	K.KQDTPQYN[+1864.634]LTIEVSDKDFK.T	HexNAc(2)Hex(9)Fuc(0)NeuAc(0)	N[+1865]	1034.2	4	4133.79	4133.77	0	4.4	412	Specific	330.1	217.54	217.54	5.86	78	>sp|Q12864|CAD17_HUMAN Cadherin-17 OS=Homo sapiens GN=CDH17 PE=2 SV=3	2038	Caco2P7_diffgpep1.13654.13654.4	controllerType=0 controllerNumber=1 scan=13654	64.4955
15736:4	9	K.KQDTPQYN[+2116.756]LTIEVSDKDFK.T	HexNAc(5)Hex(5)Fuc(0)NeuAc(1)	N[+2117]	1096.98	4	4384.9	4385.89	-1	3.3	412	Specific	395.59	263.47	263.47	6.38	78	>sp|Q12864|CAD17_HUMAN Cadherin-17 OS=Homo sapiens GN=CDH17 PE=2 SV=3	2038	Caco2P7_diffgpep1.15092.15092.4	controllerType=0 controllerNumber=1 scan=15092	71.4814
15677:4	9	K.KQDTPQYN[+2424.867]LTIEVSDKDFK.T	HexNAc(5)Hex(6)Fuc(1)NeuAc(1)	N[+2425]	1174.26	4	4694.01	4694	0	2.3	412	Specific	409.76	286.45	50.98	6.72	78	>sp|Q12864|CAD17_HUMAN Cadherin-17 OS=Homo sapiens GN=CDH17 PE=2 SV=3	2038	Caco2P7_diffgpep1.15046.15046.4	controllerType=0 controllerNumber=1 scan=15046	71.2512
15650:4	9	K.KQDTPQYN[+2774.004]LTIEVSDKDFK.T	HexNAc(6)Hex(6)Fuc(2)NeuAc(1)	N[+2774]	1261.54	4	5043.15	5043.14	0	2.4	412	Specific	431.84	300.32	28	6.8	78	>sp|Q12864|CAD17_HUMAN Cadherin-17 OS=Homo sapiens GN=CDH17 PE=2 SV=3	2038	Caco2P7_diffgpep1.15027.15027.4	controllerType=0 controllerNumber=1 scan=15027	71.1557
13953:4	9	K.KQDTPQYN[+2627.947]LTIEVSDKDFK.T	HexNAc(6)Hex(6)Fuc(1)NeuAc(1)	N[+2628]	1225.28	4	4898.11	4897.08	1	5.5	412	Specific	468.96	309.5	25.87	6.43	78	>sp|Q12864|CAD17_HUMAN Cadherin-17 OS=Homo sapiens GN=CDH17 PE=2 SV=3	2038	Caco2P7_diffgpep1.13633.13633.4	controllerType=0 controllerNumber=1 scan=13633	64.3892
14137:4	9	K.KQDTPQYN[+1809.666]LTIEVSDKDFK.T	HexNAc(5)Hex(4)Fuc(1)NeuAc(0)	N[+1810]	1020.46	4	4078.81	4078.8	0	2.1	412	Specific	481.57	369.11	369.11	7.59	78	>sp|Q12864|CAD17_HUMAN Cadherin-17 OS=Homo sapiens GN=CDH17 PE=2 SV=3	2038	Caco2P7_diffgpep1.13784.13784.4	controllerType=0 controllerNumber=1 scan=13784	65.1331
17725:4	9	K.KQDTPQYN[+2408.872]LTIEVSDKDFK.T	HexNAc(5)Hex(5)Fuc(2)NeuAc(1)	N[+2409]	1170.01	4	4677	4678.01	-1	-0.8	412	Specific	537.17	379.87	15.97	7.37	78	>sp|Q12864|CAD17_HUMAN Cadherin-17 OS=Homo sapiens GN=CDH17 PE=2 SV=3	2038	Caco2P7_diffgpep1.16652.16652.4	controllerType=0 controllerNumber=1 scan=16652	79.2142
14047:4	9	K.KQDTPQYN[+1971.719]LTIEVSDKDFK.T	HexNAc(5)Hex(5)Fuc(1)NeuAc(0)	N[+1972]	1060.97	4	4240.86	4240.85	0	1.8	412	Specific	557.75	354.2	354.2	7.73	78	>sp|Q12864|CAD17_HUMAN Cadherin-17 OS=Homo sapiens GN=CDH17 PE=2 SV=3	2038	Caco2P7_diffgpep1.13715.13715.4	controllerType=0 controllerNumber=1 scan=13715	64.7988
15768:4	9	K.KQDTPQYN[+2262.814]LTIEVSDKDFK.T	HexNAc(5)Hex(5)Fuc(1)NeuAc(1)	N[+2263]	1133.74	4	4531.96	4531.95	0	1.9	412	Specific	616.06	455.91	33.26	11.74	78	>sp|Q12864|CAD17_HUMAN Cadherin-17 OS=Homo sapiens GN=CDH17 PE=2 SV=3	2038	Caco2P7_diffgpep1.15120.15120.4	controllerType=0 controllerNumber=1 scan=15120	71.6174
27360:4	9	K.SDYGN[+2789.999]LTLAEDTNIGSTILTIQATDADEPFTGSSK.I	HexNAc(6)Hex(7)Fuc(1)NeuAc(1)	N[+2790]	1609.95	4	6436.78	6435.73	1	7.2	452	Specific	73.79	73.79	31.4	2.03	78	>sp|Q12864|CAD17_HUMAN Cadherin-17 OS=Homo sapiens GN=CDH17 PE=2 SV=3	2038	Caco2P7_diffgpep1.26227.26227.2	controllerType=0 controllerNumber=1 scan=26227	121.628
27299:4	9	K.SDYGN[+2936.057]LTLAEDTNIGSTILTIQATDADEPFTGSSK.I	HexNAc(6)Hex(7)Fuc(2)NeuAc(1)	N[+2936]	1646.46	4	6582.81	6581.79	1	3.1	452	Specific	275.29	239.33	24.53	6.44	78	>sp|Q12864|CAD17_HUMAN Cadherin-17 OS=Homo sapiens GN=CDH17 PE=2 SV=3	2038	Caco2P7_diffgpep1.26140.26140.4	controllerType=0 controllerNumber=1 scan=26140	121.245
25965:4	9	K.SDYGN[+2133.772]LTLAEDTNIGSTILTIQATDADEPFTGSSK.I	HexNAc(5)Hex(6)Fuc(1)NeuAc(0)	N[+2134]	1445.63	4	5779.52	5779.5	0	2.5	452	Specific	356.33	356.33	356.33	7.14	78	>sp|Q12864|CAD17_HUMAN Cadherin-17 OS=Homo sapiens GN=CDH17 PE=2 SV=3	2038	Caco2P7_diffgpep1.24358.24358.4	controllerType=0 controllerNumber=1 scan=24358	113.924
26062:4	9	K.SDYGN[+2133.772]LTLAEDTNIGSTILTIQATDADEPFTGSSK.I	HexNAc(5)Hex(6)Fuc(1)NeuAc(0)	N[+2134]	1445.63	4	5779.48	5779.5	0	-3.4	452	Specific	377.93	377.93	377.93	6.8	78	>sp|Q12864|CAD17_HUMAN Cadherin-17 OS=Homo sapiens GN=CDH17 PE=2 SV=3	2038	Caco2P7_diffgpep1.24445.24445.4	controllerType=0 controllerNumber=1 scan=24445	114.299
25940:4	9	K.SDYGN[+2278.809]LTLAEDTNIGSTILTIQATDADEPFTGSSK.I	HexNAc(5)Hex(6)Fuc(0)NeuAc(1)	N[+2279]	1482.15	4	5925.58	5924.54	1	7	452	Specific	389.78	329.86	18.9	6.61	78	>sp|Q12864|CAD17_HUMAN Cadherin-17 OS=Homo sapiens GN=CDH17 PE=2 SV=3	2038	Caco2P7_diffgpep1.24323.24323.4	controllerType=0 controllerNumber=1 scan=24323	113.783
27361:4	9	K.SDYGN[+2570.925]LTLAEDTNIGSTILTIQATDADEPFTGSSK.I	HexNAc(5)Hex(6)Fuc(2)NeuAc(1)	N[+2571]	1554.93	4	6216.69	6216.65	0	5.7	452	Specific	390.13	357.32	24.47	6.81	78	>sp|Q12864|CAD17_HUMAN Cadherin-17 OS=Homo sapiens GN=CDH17 PE=2 SV=3	2038	Caco2P7_diffgpep1.26228.26228.4	controllerType=0 controllerNumber=1 scan=26228	121.634
25969:4	9	K.SDYGN[+2133.772]LTLAEDTNIGSTILTIQATDADEPFTGSSK.I	HexNAc(5)Hex(6)Fuc(1)NeuAc(0)	N[+2134]	1445.64	4	5779.52	5779.5	0	3.8	452	Specific	468.69	428.24	428.24	9.11	78	>sp|Q12864|CAD17_HUMAN Cadherin-17 OS=Homo sapiens GN=CDH17 PE=2 SV=3	2038	Caco2P7_diffgpep1.24365.24365.4	controllerType=0 controllerNumber=1 scan=24365	113.949
27464:4	9	K.SDYGN[+2424.867]LTLAEDTNIGSTILTIQATDADEPFTGSSK.I	HexNAc(5)Hex(6)Fuc(1)NeuAc(1)	N[+2425]	1518.41	4	6070.62	6070.6	0	4	452	Specific	601.81	527.15	22.54	11.96	78	>sp|Q12864|CAD17_HUMAN Cadherin-17 OS=Homo sapiens GN=CDH17 PE=2 SV=3	2038	Caco2P7_diffgpep1.26392.26392.4	controllerType=0 controllerNumber=1 scan=26392	122.314
26023:4	9	K.SDYGN[+2133.772]LTLAEDTNIGSTILTIQATDADEPFTGSSK.I	HexNAc(5)Hex(6)Fuc(1)NeuAc(0)	N[+2134]	1445.63	4	5779.5	5779.5	0	-0.6	452	Specific	603.85	567.66	567.66	11.75	78	>sp|Q12864|CAD17_HUMAN Cadherin-17 OS=Homo sapiens GN=CDH17 PE=2 SV=3	2038	Caco2P7_diffgpep1.24412.24412.4	controllerType=0 controllerNumber=1 scan=24412	114.155
27479:4	9	K.SDYGN[+2424.867]LTLAEDTNIGSTILTIQATDADEPFTGSSK.I	HexNAc(5)Hex(6)Fuc(1)NeuAc(1)	N[+2425]	1518.41	4	6070.62	6070.6	0	3.7	452	Specific	609.83	508.89	22.82	11.96	78	>sp|Q12864|CAD17_HUMAN Cadherin-17 OS=Homo sapiens GN=CDH17 PE=2 SV=3	2038	Caco2P7_diffgpep1.26411.26411.4	controllerType=0 controllerNumber=1 scan=26411	122.397
27417:4	9	K.SDYGN[+2424.867]LTLAEDTNIGSTILTIQATDADEPFTGSSK.I	HexNAc(5)Hex(6)Fuc(1)NeuAc(1)	N[+2425]	1518.41	4	6070.63	6070.6	0	5.6	452	Specific	671.92	606.18	24.15	12.54	78	>sp|Q12864|CAD17_HUMAN Cadherin-17 OS=Homo sapiens GN=CDH17 PE=2 SV=3	2038	Caco2P7_diffgpep1.26303.26303.4	controllerType=0 controllerNumber=1 scan=26303	121.948
07073:3	9	K.YN[+2424.867]ASSFAK.F	HexNAc(5)Hex(6)Fuc(1)NeuAc(1)	N[+2425]	1104.77	3	3312.3	3312.29	0	0.9	545	Specific	223.07	102.2	102.2	4.35	78	>sp|Q12864|CAD17_HUMAN Cadherin-17 OS=Homo sapiens GN=CDH17 PE=2 SV=3	2038	Caco2P7_diffgpep1.7751.7751.3	controllerType=0 controllerNumber=1 scan=7751	35.9689
07157:3	9	K.YN[+2465.894]ASSFAK.F	HexNAc(6)Hex(5)Fuc(1)NeuAc(1)	N[+2466]	1118.44	3	3353.31	3353.32	0	-1.8	545	Specific	227.32	68.71	68.71	2.36	78	>sp|Q12864|CAD17_HUMAN Cadherin-17 OS=Homo sapiens GN=CDH17 PE=2 SV=3	2038	Caco2P7_diffgpep1.7819.7819.3	controllerType=0 controllerNumber=1 scan=7819	36.3068
09253:3	9	K.YN[+2919.042]ASSFAK.F	HexNAc(6)Hex(6)Fuc(1)NeuAc(2)	N[+2919]	1269.49	3	3806.46	3806.47	0	-1.6	545	Specific	254.86	78.96	78.96	2.42	78	>sp|Q12864|CAD17_HUMAN Cadherin-17 OS=Homo sapiens GN=CDH17 PE=2 SV=3	2038	Caco2P7_diffgpep1.9638.9638.3	controllerType=0 controllerNumber=1 scan=9638	45.1188
09259:3	9	K.YN[+2919.042]ASSFAK.F	HexNAc(6)Hex(6)Fuc(1)NeuAc(2)	N[+2919]	1269.5	3	3806.47	3806.47	0	1.7	545	Specific	273.07	106.85	106.85	4.93	78	>sp|Q12864|CAD17_HUMAN Cadherin-17 OS=Homo sapiens GN=CDH17 PE=2 SV=3	2038	Caco2P7_diffgpep1.9644.9644.3	controllerType=0 controllerNumber=1 scan=9644	45.1475
07134:3	9	K.YN[+2059.735]ASSFAK.F	HexNAc(4)Hex(5)Fuc(1)NeuAc(1)	N[+2060]	983.061	3	2947.17	2947.16	0	2.8	545	Specific	277.18	97.03	97.03	4.58	78	>sp|Q12864|CAD17_HUMAN Cadherin-17 OS=Homo sapiens GN=CDH17 PE=2 SV=3	2038	Caco2P7_diffgpep1.7802.7802.3	controllerType=0 controllerNumber=1 scan=7802	36.2223
09311:3	9	K.YN[+2919.042]ASSFAK.F	HexNAc(6)Hex(6)Fuc(1)NeuAc(2)	N[+2919]	1269.5	3	3806.48	3806.47	0	2.5	545	Specific	292.96	112.45	112.45	4.81	78	>sp|Q12864|CAD17_HUMAN Cadherin-17 OS=Homo sapiens GN=CDH17 PE=2 SV=3	2038	Caco2P7_diffgpep1.9685.9685.3	controllerType=0 controllerNumber=1 scan=9685	45.3497
07014:3	9	K.YN[+2774.004]ASSFAK.F	HexNAc(6)Hex(6)Fuc(2)NeuAc(1)	N[+2774]	1221.15	3	3661.45	3661.43	0	5	545	Specific	294.31	136.38	136.38	4.7	78	>sp|Q12864|CAD17_HUMAN Cadherin-17 OS=Homo sapiens GN=CDH17 PE=2 SV=3	2038	Caco2P7_diffgpep1.7703.7703.3	controllerType=0 controllerNumber=1 scan=7703	35.7282
07043:3	9	K.YN[+2262.814]ASSFAK.F	HexNAc(5)Hex(5)Fuc(1)NeuAc(1)	N[+2263]	1050.75	3	3150.25	3150.24	0	2.2	545	Specific	305.7	102.75	102.75	5.03	78	>sp|Q12864|CAD17_HUMAN Cadherin-17 OS=Homo sapiens GN=CDH17 PE=2 SV=3	2038	Caco2P7_diffgpep1.7727.7727.3	controllerType=0 controllerNumber=1 scan=7727	35.8507
04859:2	9	K.YN[+1864.634]ASSFAK.F	HexNAc(2)Hex(9)Fuc(0)NeuAc(0)	N[+1865]	1376.53	2	2752.06	2752.06	0	0.6	545	Specific	323.9	186.61	186.61	5.96	78	>sp|Q12864|CAD17_HUMAN Cadherin-17 OS=Homo sapiens GN=CDH17 PE=2 SV=3	2038	Caco2P7_diffgpep1.5779.5779.2	controllerType=0 controllerNumber=1 scan=5779	26.6026
07074:3	9	K.YN[+2627.947]ASSFAK.F	HexNAc(6)Hex(6)Fuc(1)NeuAc(1)	N[+2628]	1172.46	3	3515.38	3515.37	0	1.4	545	Specific	367.4	172.19	172.19	5.75	78	>sp|Q12864|CAD17_HUMAN Cadherin-17 OS=Homo sapiens GN=CDH17 PE=2 SV=3	2038	Caco2P7_diffgpep1.7752.7752.3	controllerType=0 controllerNumber=1 scan=7752	35.9746
00664:3	9	K.VGN[+2408.872]VTAK.D	HexNAc(5)Hex(5)Fuc(2)NeuAc(1)	N[+2409]	1033.1	3	3097.28	3097.27	0	1.9	585	Specific	246.92	71.56	71.56	2.16	78	>sp|Q12864|CAD17_HUMAN Cadherin-17 OS=Homo sapiens GN=CDH17 PE=2 SV=3	2038	Caco2P7_diffgpep1.2343.2343.3	controllerType=0 controllerNumber=1 scan=2343	10.5289
01030:3	9	K.VGN[+2627.947]VTAK.D	HexNAc(6)Hex(6)Fuc(1)NeuAc(1)	N[+2628]	1106.12	3	3316.35	3316.35	0	2.1	585	Specific	259.05	66.38	66.38	2.16	78	>sp|Q12864|CAD17_HUMAN Cadherin-17 OS=Homo sapiens GN=CDH17 PE=2 SV=3	2038	Caco2P7_diffgpep1.2638.2638.3	controllerType=0 controllerNumber=1 scan=2638	11.8707
01116:2	9	K.VGN[+2262.814]VTAK.D	HexNAc(5)Hex(5)Fuc(1)NeuAc(1)	N[+2263]	1476.11	2	2951.22	2951.21	0	2.9	585	Specific	263.07	46.11	46.11	2.15	78	>sp|Q12864|CAD17_HUMAN Cadherin-17 OS=Homo sapiens GN=CDH17 PE=2 SV=3	2038	Caco2P7_diffgpep1.2703.2703.2	controllerType=0 controllerNumber=1 scan=2703	12.18
02356:3	9	K.VGN[+2553.910]VTAK.D	HexNAc(5)Hex(5)Fuc(1)NeuAc(2)	N[+2554]	1081.44	3	3242.31	3242.31	0	0.8	585	Specific	268.5	60.94	60.94	2.32	78	>sp|Q12864|CAD17_HUMAN Cadherin-17 OS=Homo sapiens GN=CDH17 PE=2 SV=3	2038	Caco2P7_diffgpep1.3828.3828.3	controllerType=0 controllerNumber=1 scan=3828	17.2192
01367:3	9	K.VGN[+2774.004]VTAK.D	HexNAc(6)Hex(6)Fuc(2)NeuAc(1)	N[+2774]	1154.81	3	3462.42	3462.4	0	3.8	585	Specific	275.3	71.31	71.31	2.29	78	>sp|Q12864|CAD17_HUMAN Cadherin-17 OS=Homo sapiens GN=CDH17 PE=2 SV=3	2038	Caco2P7_diffgpep1.2919.2919.3	controllerType=0 controllerNumber=1 scan=2919	13.1572
00424:3	9	K.VGN[+1971.719]VTAK.D	HexNAc(5)Hex(5)Fuc(1)NeuAc(0)	N[+1972]	887.379	3	2660.12	2660.12	0	2.3	585	Specific	278.95	89.65	89.65	2.41	78	>sp|Q12864|CAD17_HUMAN Cadherin-17 OS=Homo sapiens GN=CDH17 PE=2 SV=3	2038	Caco2P7_diffgpep1.2093.2093.3	controllerType=0 controllerNumber=1 scan=2093	9.4624
02566:3	9	K.VGN[+2553.910]VTAK.D	HexNAc(5)Hex(5)Fuc(1)NeuAc(2)	N[+2554]	1081.44	3	3242.32	3242.31	0	2.8	585	Specific	287.67	86.12	86.12	2.42	78	>sp|Q12864|CAD17_HUMAN Cadherin-17 OS=Homo sapiens GN=CDH17 PE=2 SV=3	2038	Caco2P7_diffgpep1.3992.3992.3	controllerType=0 controllerNumber=1 scan=3992	18.0268
01381:3	9	K.VGN[+2408.872]VTAK.D	HexNAc(5)Hex(5)Fuc(2)NeuAc(1)	N[+2409]	1033.1	3	3097.28	3097.27	0	2.9	585	Specific	289.59	92.92	92.92	2.42	78	>sp|Q12864|CAD17_HUMAN Cadherin-17 OS=Homo sapiens GN=CDH17 PE=2 SV=3	2038	Caco2P7_diffgpep1.2931.2931.3	controllerType=0 controllerNumber=1 scan=2931	13.2091
02981:3	9	K.VGN[+2919.042]VTAK.D	HexNAc(6)Hex(6)Fuc(1)NeuAc(2)	N[+2919]	1203.16	3	3607.45	3607.44	0	3.4	585	Specific	291.95	85.94	85.94	2.41	78	>sp|Q12864|CAD17_HUMAN Cadherin-17 OS=Homo sapiens GN=CDH17 PE=2 SV=3	2038	Caco2P7_diffgpep1.4317.4317.3	controllerType=0 controllerNumber=1 scan=4317	19.5766
01027:2	9	K.VGN[+2262.814]VTAK.D	HexNAc(5)Hex(5)Fuc(1)NeuAc(1)	N[+2263]	1476.11	2	2951.22	2951.21	0	2.9	585	Specific	316.9	71.49	71.49	2.43	78	>sp|Q12864|CAD17_HUMAN Cadherin-17 OS=Homo sapiens GN=CDH17 PE=2 SV=3	2038	Caco2P7_diffgpep1.2632.2632.2	controllerType=0 controllerNumber=1 scan=2632	11.8477
01133:3	9	K.VGN[+2262.814]VTAK.D	HexNAc(5)Hex(5)Fuc(1)NeuAc(1)	N[+2263]	984.411	3	2951.22	2951.21	0	1.8	585	Specific	339.15	139.64	139.64	4.25	78	>sp|Q12864|CAD17_HUMAN Cadherin-17 OS=Homo sapiens GN=CDH17 PE=2 SV=3	2038	Caco2P7_diffgpep1.2717.2717.3	controllerType=0 controllerNumber=1 scan=2717	12.2439
00425:2	9	K.VGN[+1971.719]VTAK.D	HexNAc(5)Hex(5)Fuc(1)NeuAc(0)	N[+1972]	1330.57	2	2660.12	2660.12	0	2.5	585	Specific	371.54	115.59	115.59	4.23	78	>sp|Q12864|CAD17_HUMAN Cadherin-17 OS=Homo sapiens GN=CDH17 PE=2 SV=3	2038	Caco2P7_diffgpep1.2094.2094.2	controllerType=0 controllerNumber=1 scan=2094	9.4681
01301:3	9	K.VGN[+2262.814]VTAK.D	HexNAc(5)Hex(5)Fuc(1)NeuAc(1)	N[+2263]	984.411	3	2951.22	2951.21	0	2	585	Specific	373.88	120.49	120.49	4.13	78	>sp|Q12864|CAD17_HUMAN Cadherin-17 OS=Homo sapiens GN=CDH17 PE=2 SV=3	2038	Caco2P7_diffgpep1.2852.2852.3	controllerType=0 controllerNumber=1 scan=2852	12.8628
02388:3	9	K.VGN[+2553.910]VTAK.D	HexNAc(5)Hex(5)Fuc(1)NeuAc(2)	N[+2554]	1081.44	3	3242.31	3242.31	0	1.3	585	Specific	381.48	131.63	131.63	4.33	78	>sp|Q12864|CAD17_HUMAN Cadherin-17 OS=Homo sapiens GN=CDH17 PE=2 SV=3	2038	Caco2P7_diffgpep1.3857.3857.3	controllerType=0 controllerNumber=1 scan=3857	17.3599
14663:4	9	K.VGN[+2117.777]VTAKDPEGLDISYSLR.G	HexNAc(5)Hex(5)Fuc(2)NeuAc(0)	N[+2118]	1038.71	4	4151.83	4151.83	0	-0.4	585	Specific	140.56	124.47	12.17	2.31	78	>sp|Q12864|CAD17_HUMAN Cadherin-17 OS=Homo sapiens GN=CDH17 PE=2 SV=3	2038	Caco2P7_diffgpep1.14222.14222.4	controllerType=0 controllerNumber=1 scan=14222	67.255
16456:4	9	K.VGN[+2627.947]VTAKDPEGLDISYSLR.G	HexNAc(6)Hex(6)Fuc(1)NeuAc(1)	N[+2628]	1166.26	4	4662.02	4662	0	5.9	585	Specific	214.88	118.69	15.75	2.02	78	>sp|Q12864|CAD17_HUMAN Cadherin-17 OS=Homo sapiens GN=CDH17 PE=2 SV=3	2038	Caco2P7_diffgpep1.15673.15673.4	controllerType=0 controllerNumber=1 scan=15673	74.3216
14692:3	9	K.VGN[+2117.777]VTAKDPEGLDISYSLR.G	HexNAc(5)Hex(5)Fuc(2)NeuAc(0)	N[+2118]	1384.95	3	4152.83	4151.83	1	-0.5	585	Specific	235.4	172.51	172.51	5.07	78	>sp|Q12864|CAD17_HUMAN Cadherin-17 OS=Homo sapiens GN=CDH17 PE=2 SV=3	2038	Caco2P7_diffgpep1.14249.14249.3	controllerType=0 controllerNumber=1 scan=14249	67.3889
18923:4	9	K.VGN[+2553.910]VTAKDPEGLDISYSLR.G	HexNAc(5)Hex(5)Fuc(1)NeuAc(2)	N[+2554]	1147.5	4	4586.97	4587.96	-1	3.2	585	Specific	238.69	181.99	181.99	5.24	78	>sp|Q12864|CAD17_HUMAN Cadherin-17 OS=Homo sapiens GN=CDH17 PE=2 SV=3	2038	Caco2P7_diffgpep1.17580.17580.4	controllerType=0 controllerNumber=1 scan=17580	83.7263
16413:3	9	K.VGN[+2408.872]VTAKDPEGLDISYSLR.G	HexNAc(5)Hex(5)Fuc(2)NeuAc(1)	N[+2409]	1481.97	3	4443.91	4442.92	1	-3.6	585	Specific	266.17	184.84	39.71	5.31	78	>sp|Q12864|CAD17_HUMAN Cadherin-17 OS=Homo sapiens GN=CDH17 PE=2 SV=3	2038	Caco2P7_diffgpep1.15637.15637.3	controllerType=0 controllerNumber=1 scan=15637	74.1425
16402:4	9	K.VGN[+2408.872]VTAKDPEGLDISYSLR.G	HexNAc(5)Hex(5)Fuc(2)NeuAc(1)	N[+2409]	1111.24	4	4441.94	4442.92	-1	4.3	585	Specific	331.12	189.81	19.04	5.6	78	>sp|Q12864|CAD17_HUMAN Cadherin-17 OS=Homo sapiens GN=CDH17 PE=2 SV=3	2038	Caco2P7_diffgpep1.15627.15627.4	controllerType=0 controllerNumber=1 scan=15627	74.0924
14790:3	9	K.VGN[+1971.719]VTAKDPEGLDISYSLR.G	HexNAc(5)Hex(5)Fuc(1)NeuAc(0)	N[+1972]	1335.94	3	4005.8	4005.77	0	6.6	585	Specific	365.87	206.03	206.03	5.76	78	>sp|Q12864|CAD17_HUMAN Cadherin-17 OS=Homo sapiens GN=CDH17 PE=2 SV=3	2038	Caco2P7_diffgpep1.14336.14336.3	controllerType=0 controllerNumber=1 scan=14336	67.8227
16507:3	9	K.VGN[+2262.814]VTAKDPEGLDISYSLR.G	HexNAc(5)Hex(5)Fuc(1)NeuAc(1)	N[+2263]	1432.97	3	4296.89	4296.86	0	6.7	585	Specific	368.58	178.32	27.81	5.56	78	>sp|Q12864|CAD17_HUMAN Cadherin-17 OS=Homo sapiens GN=CDH17 PE=2 SV=3	2038	Caco2P7_diffgpep1.15714.15714.3	controllerType=0 controllerNumber=1 scan=15714	74.5245
16442:4	9	K.VGN[+2408.872]VTAKDPEGLDISYSLR.G	HexNAc(5)Hex(5)Fuc(2)NeuAc(1)	N[+2409]	1111.49	4	4442.93	4442.92	0	1.9	585	Specific	427.66	242.09	32.86	6.48	78	>sp|Q12864|CAD17_HUMAN Cadherin-17 OS=Homo sapiens GN=CDH17 PE=2 SV=3	2038	Caco2P7_diffgpep1.15661.15661.4	controllerType=0 controllerNumber=1 scan=15661	74.2606
16415:4	9	K.VGN[+2408.872]VTAKDPEGLDISYSLR.G	HexNAc(5)Hex(5)Fuc(2)NeuAc(1)	N[+2409]	1111.49	4	4442.92	4442.92	0	0.4	585	Specific	437.68	296.27	20.37	6.53	78	>sp|Q12864|CAD17_HUMAN Cadherin-17 OS=Homo sapiens GN=CDH17 PE=2 SV=3	2038	Caco2P7_diffgpep1.15640.15640.4	controllerType=0 controllerNumber=1 scan=15640	74.1544
16538:4	9	K.VGN[+2262.814]VTAKDPEGLDISYSLR.G	HexNAc(5)Hex(5)Fuc(1)NeuAc(1)	N[+2263]	1074.97	4	4296.87	4296.86	0	1.8	585	Specific	489.13	442.4	26.15	8.74	78	>sp|Q12864|CAD17_HUMAN Cadherin-17 OS=Homo sapiens GN=CDH17 PE=2 SV=3	2038	Caco2P7_diffgpep1.15738.15738.4	controllerType=0 controllerNumber=1 scan=15738	74.6428
12489:3	10	R.SSC[+57.021]GKEN[+2700.988]TSDPSLVIAFGR.G	HexNAc(5)Hex(5)Fuc(4)NeuAc(1)	C[+57], N[+2701]	1576.33	3	4726.98	4725.96	1	4.8	78	Specific	100.54	72.66	42.61	2.01	103	>sp|P11279|LAMP1_HUMAN Lysosome-associated membrane glycoprotein 1 OS=Homo sapiens GN=LAMP1 PE=1 SV=3	9237	Caco2P7_diffgpep1.12457.12457.3	controllerType=0 controllerNumber=1 scan=12457	58.6012
14300:4	10	R.SSC[+57.021]GKEN[+3357.216]TSDPSLVIAFGR.G	HexNAc(6)Hex(6)Fuc(4)NeuAc(2)	C[+57], N[+3357]	1346.56	4	5383.21	5382.19	1	3.4	78	Specific	133.69	133.69	133.69	2.38	103	>sp|P11279|LAMP1_HUMAN Lysosome-associated membrane glycoprotein 1 OS=Homo sapiens GN=LAMP1 PE=1 SV=3	9237	Caco2P7_diffgpep1.13920.13920.4	controllerType=0 controllerNumber=1 scan=13920	65.7818
14476:4	10	R.SSC[+57.021]GKEN[+3139.137]TSDPSLVIAFGR.G	HexNAc(7)Hex(7)Fuc(2)NeuAc(1)	C[+57], N[+3139]	1292.04	4	5165.13	5164.11	1	4.7	78	Specific	145.78	145.78	18.31	2.37	103	>sp|P11279|LAMP1_HUMAN Lysosome-associated membrane glycoprotein 1 OS=Homo sapiens GN=LAMP1 PE=1 SV=3	9237	Caco2P7_diffgpep1.14060.14060.4	controllerType=0 controllerNumber=1 scan=14060	66.4579
15239:4	10	R.SSC[+57.021]GKEN[+2262.814]TSDPSLVIAFGR.G	HexNAc(5)Hex(5)Fuc(1)NeuAc(1)	C[+57], N[+2263]	1072.71	4	4287.8	4287.78	0	3.4	78	Specific	152.75	70.81	18.95	2.01	103	>sp|P11279|LAMP1_HUMAN Lysosome-associated membrane glycoprotein 1 OS=Homo sapiens GN=LAMP1 PE=1 SV=3	9237	Caco2P7_diffgpep1.14703.14703.4	controllerType=0 controllerNumber=1 scan=14703	69.6205
12756:3	10	R.SSC[+57.021]GKEN[+1768.640]TSDPSLVIAFGR.G	HexNAc(4)Hex(5)Fuc(1)NeuAc(0)	C[+57], N[+1769]	1265.21	3	3793.61	3793.61	0	-0.5	78	Specific	169.84	72.53	72.53	2.01	103	>sp|P11279|LAMP1_HUMAN Lysosome-associated membrane glycoprotein 1 OS=Homo sapiens GN=LAMP1 PE=1 SV=3	9237	Caco2P7_diffgpep1.12672.12672.3	controllerType=0 controllerNumber=1 scan=12672	59.6452
12829:3	10	R.SSC[+57.021]GKEN[+2117.777]TSDPSLVIAFGR.G	HexNAc(5)Hex(5)Fuc(2)NeuAc(0)	C[+57], N[+2118]	1381.92	3	4143.75	4142.75	1	-1.1	78	Specific	177.48	119.94	119.94	2.06	103	>sp|P11279|LAMP1_HUMAN Lysosome-associated membrane glycoprotein 1 OS=Homo sapiens GN=LAMP1 PE=1 SV=3	9237	Caco2P7_diffgpep1.12734.12734.3	controllerType=0 controllerNumber=1 scan=12734	59.9384
12891:3	10	R.SSC[+57.021]GKEN[+1768.640]TSDPSLVIAFGR.G	HexNAc(4)Hex(5)Fuc(1)NeuAc(0)	C[+57], N[+1769]	1265.21	3	3793.62	3793.61	0	3.8	78	Specific	185.63	107.22	107.22	2.39	103	>sp|P11279|LAMP1_HUMAN Lysosome-associated membrane glycoprotein 1 OS=Homo sapiens GN=LAMP1 PE=1 SV=3	9237	Caco2P7_diffgpep1.12783.12783.3	controllerType=0 controllerNumber=1 scan=12783	60.1734
17439:4	10	R.SSC[+57.021]GKEN[+2756.989]TSDPSLVIAFGR.G	HexNAc(6)Hex(5)Fuc(1)NeuAc(2)	C[+57], N[+2757]	1196.5	4	4782.99	4781.96	1	4.8	78	Specific	196.36	150.09	25.07	2.37	103	>sp|P11279|LAMP1_HUMAN Lysosome-associated membrane glycoprotein 1 OS=Homo sapiens GN=LAMP1 PE=1 SV=3	9237	Caco2P7_diffgpep1.16438.16438.4	controllerType=0 controllerNumber=1 scan=16438	78.1434
15266:3	10	R.SSC[+57.021]GKEN[+2262.814]TSDPSLVIAFGR.G	HexNAc(5)Hex(5)Fuc(1)NeuAc(1)	C[+57], N[+2263]	1429.59	3	4286.76	4287.78	-1	-5.4	78	Specific	197.49	152.37	152.37	2.11	103	>sp|P11279|LAMP1_HUMAN Lysosome-associated membrane glycoprotein 1 OS=Homo sapiens GN=LAMP1 PE=1 SV=3	9237	Caco2P7_diffgpep1.14723.14723.3	controllerType=0 controllerNumber=1 scan=14723	69.7211
12713:4	10	R.SSC[+57.021]GKEN[+2627.947]TSDPSLVIAFGR.G	HexNAc(6)Hex(6)Fuc(1)NeuAc(1)	C[+57], N[+2628]	1164.24	4	4653.95	4652.92	1	7.1	78	Specific	199.33	172.82	12.64	2.32	103	>sp|P11279|LAMP1_HUMAN Lysosome-associated membrane glycoprotein 1 OS=Homo sapiens GN=LAMP1 PE=1 SV=3	9237	Caco2P7_diffgpep1.12636.12636.4	controllerType=0 controllerNumber=1 scan=12636	59.4774
12801:4	10	R.SSC[+57.021]GKEN[+2336.851]TSDPSLVIAFGR.G	HexNAc(6)Hex(6)Fuc(1)NeuAc(0)	C[+57], N[+2337]	1091.21	4	4361.84	4361.82	0	3.2	78	Specific	202.02	202.02	202.02	3.91	103	>sp|P11279|LAMP1_HUMAN Lysosome-associated membrane glycoprotein 1 OS=Homo sapiens GN=LAMP1 PE=1 SV=3	9237	Caco2P7_diffgpep1.12710.12710.4	controllerType=0 controllerNumber=1 scan=12710	59.8276
14742:4	10	R.SSC[+57.021]GKEN[+2627.947]TSDPSLVIAFGR.G	HexNAc(6)Hex(6)Fuc(1)NeuAc(1)	C[+57], N[+2628]	1164.24	4	4653.92	4652.92	1	0.6	78	Specific	207.1	168.43	31.13	2.85	103	>sp|P11279|LAMP1_HUMAN Lysosome-associated membrane glycoprotein 1 OS=Homo sapiens GN=LAMP1 PE=1 SV=3	9237	Caco2P7_diffgpep1.14296.14296.4	controllerType=0 controllerNumber=1 scan=14296	67.6214
17751:4	10	R.SSC[+57.021]GKEN[+2553.910]TSDPSLVIAFGR.G	HexNAc(5)Hex(5)Fuc(1)NeuAc(2)	C[+57], N[+2554]	1145.48	4	4578.89	4578.88	0	2.9	78	Specific	217.21	165.26	17.41	2.09	103	>sp|P11279|LAMP1_HUMAN Lysosome-associated membrane glycoprotein 1 OS=Homo sapiens GN=LAMP1 PE=1 SV=3	9237	Caco2P7_diffgpep1.16673.16673.4	controllerType=0 controllerNumber=1 scan=16673	79.3168
12638:4	10	R.SSC[+57.021]GKEN[+2336.851]TSDPSLVIAFGR.G	HexNAc(6)Hex(6)Fuc(1)NeuAc(0)	C[+57], N[+2337]	1091.21	4	4361.82	4361.82	0	-1	78	Specific	228.91	166.51	166.51	4.54	103	>sp|P11279|LAMP1_HUMAN Lysosome-associated membrane glycoprotein 1 OS=Homo sapiens GN=LAMP1 PE=1 SV=3	9237	Caco2P7_diffgpep1.12577.12577.4	controllerType=0 controllerNumber=1 scan=12577	59.1845
14883:4	10	R.SSC[+57.021]GKEN[+2627.947]TSDPSLVIAFGR.G	HexNAc(6)Hex(6)Fuc(1)NeuAc(1)	C[+57], N[+2628]	1163.74	4	4651.92	4652.92	-1	1.6	78	Specific	232.71	162.89	162.89	5.19	103	>sp|P11279|LAMP1_HUMAN Lysosome-associated membrane glycoprotein 1 OS=Homo sapiens GN=LAMP1 PE=1 SV=3	9237	Caco2P7_diffgpep1.14417.14417.4	controllerType=0 controllerNumber=1 scan=14417	68.2153
15254:4	10	R.SSC[+57.021]GKEN[+1897.682]TSDPSLVIAFGR.G	HexNAc(4)Hex(4)Fuc(1)NeuAc(1)	C[+57], N[+1898]	981.419	4	3922.65	3922.65	0	0.1	78	Specific	248.6	197.66	197.66	4.27	103	>sp|P11279|LAMP1_HUMAN Lysosome-associated membrane glycoprotein 1 OS=Homo sapiens GN=LAMP1 PE=1 SV=3	9237	Caco2P7_diffgpep1.14714.14714.4	controllerType=0 controllerNumber=1 scan=14714	69.6762
14773:4	10	R.SSC[+57.021]GKEN[+2774.004]TSDPSLVIAFGR.G	HexNAc(6)Hex(6)Fuc(2)NeuAc(1)	C[+57], N[+2774]	1200.26	4	4798	4798.98	-1	6.2	78	Specific	254.28	211.13	20.51	4.98	103	>sp|P11279|LAMP1_HUMAN Lysosome-associated membrane glycoprotein 1 OS=Homo sapiens GN=LAMP1 PE=1 SV=3	9237	Caco2P7_diffgpep1.14321.14321.4	controllerType=0 controllerNumber=1 scan=14321	67.7494
12617:3	10	R.SSC[+57.021]GKEN[+2336.851]TSDPSLVIAFGR.G	HexNAc(6)Hex(6)Fuc(1)NeuAc(0)	C[+57], N[+2337]	1454.28	3	4360.84	4361.82	-1	4.6	78	Specific	264.4	220.17	220.17	5.63	103	>sp|P11279|LAMP1_HUMAN Lysosome-associated membrane glycoprotein 1 OS=Homo sapiens GN=LAMP1 PE=1 SV=3	9237	Caco2P7_diffgpep1.12556.12556.3	controllerType=0 controllerNumber=1 scan=12556	59.0832
12861:3	10	R.SSC[+57.021]GKEN[+2174.798]TSDPSLVIAFGR.G	HexNAc(6)Hex(5)Fuc(1)NeuAc(0)	C[+57], N[+2175]	1400.27	3	4198.79	4199.77	-1	6.1	78	Specific	264.96	147.99	147.99	5.26	103	>sp|P11279|LAMP1_HUMAN Lysosome-associated membrane glycoprotein 1 OS=Homo sapiens GN=LAMP1 PE=1 SV=3	9237	Caco2P7_diffgpep1.12758.12758.3	controllerType=0 controllerNumber=1 scan=12758	60.0533
14760:4	10	R.SSC[+57.021]GKEN[+2774.004]TSDPSLVIAFGR.G	HexNAc(6)Hex(6)Fuc(2)NeuAc(1)	C[+57], N[+2774]	1200.25	4	4797.99	4798.98	-1	2.8	78	Specific	266.11	181.56	21.26	5.71	103	>sp|P11279|LAMP1_HUMAN Lysosome-associated membrane glycoprotein 1 OS=Homo sapiens GN=LAMP1 PE=1 SV=3	9237	Caco2P7_diffgpep1.14311.14311.4	controllerType=0 controllerNumber=1 scan=14311	67.6991
12585:4	10	R.SSC[+57.021]GKEN[+2538.935]TSDPSLVIAFGR.G	HexNAc(5)Hex(4)Fuc(4)NeuAc(1)	C[+57], N[+2539]	1141.98	4	4564.91	4563.91	1	1.2	78	Specific	291.36	176.43	25.35	5.68	103	>sp|P11279|LAMP1_HUMAN Lysosome-associated membrane glycoprotein 1 OS=Homo sapiens GN=LAMP1 PE=1 SV=3	9237	Caco2P7_diffgpep1.12534.12534.4	controllerType=0 controllerNumber=1 scan=12534	58.972
12796:3	10	R.SSC[+57.021]GKEN[+2336.851]TSDPSLVIAFGR.G	HexNAc(6)Hex(6)Fuc(1)NeuAc(0)	C[+57], N[+2337]	1454.61	3	4361.82	4361.82	0	-1	78	Specific	307.72	242.65	242.65	5.63	103	>sp|P11279|LAMP1_HUMAN Lysosome-associated membrane glycoprotein 1 OS=Homo sapiens GN=LAMP1 PE=1 SV=3	9237	Caco2P7_diffgpep1.12705.12705.3	controllerType=0 controllerNumber=1 scan=12705	59.8047
14645:4	10	R.SSC[+57.021]GKEN[+2992.083]TSDPSLVIAFGR.G	HexNAc(5)Hex(5)Fuc(4)NeuAc(2)	C[+57], N[+2992]	1255.27	4	5018.06	5017.05	1	0.3	78	Specific	325.77	262.97	17.64	6.11	103	>sp|P11279|LAMP1_HUMAN Lysosome-associated membrane glycoprotein 1 OS=Homo sapiens GN=LAMP1 PE=1 SV=3	9237	Caco2P7_diffgpep1.14209.14209.4	controllerType=0 controllerNumber=1 scan=14209	67.1883
12898:3	10	R.SSC[+57.021]GKEN[+2174.798]TSDPSLVIAFGR.G	HexNAc(6)Hex(5)Fuc(1)NeuAc(0)	C[+57], N[+2175]	1400.59	3	4199.77	4199.77	0	0.1	78	Specific	326.04	209.09	209.09	5.94	103	>sp|P11279|LAMP1_HUMAN Lysosome-associated membrane glycoprotein 1 OS=Homo sapiens GN=LAMP1 PE=1 SV=3	9237	Caco2P7_diffgpep1.12790.12790.3	controllerType=0 controllerNumber=1 scan=12790	60.2033
12730:3	10	R.SSC[+57.021]GKEN[+1971.719]TSDPSLVIAFGR.G	HexNAc(5)Hex(5)Fuc(1)NeuAc(0)	C[+57], N[+1972]	1332.9	3	3996.69	3996.69	0	0.8	78	Specific	328.5	247.69	247.69	6.3	103	>sp|P11279|LAMP1_HUMAN Lysosome-associated membrane glycoprotein 1 OS=Homo sapiens GN=LAMP1 PE=1 SV=3	9237	Caco2P7_diffgpep1.12651.12651.3	controllerType=0 controllerNumber=1 scan=12651	59.547
12626:3	10	R.SSC[+57.021]GKEN[+2336.851]TSDPSLVIAFGR.G	HexNAc(6)Hex(6)Fuc(1)NeuAc(0)	C[+57], N[+2337]	1454.28	3	4360.83	4361.82	-1	1.9	78	Specific	350.39	284.16	284.16	6.55	103	>sp|P11279|LAMP1_HUMAN Lysosome-associated membrane glycoprotein 1 OS=Homo sapiens GN=LAMP1 PE=1 SV=3	9237	Caco2P7_diffgpep1.12567.12567.3	controllerType=0 controllerNumber=1 scan=12567	59.1343
14920:3	10	R.SSC[+57.021]GKEN[+2262.814]TSDPSLVIAFGR.G	HexNAc(5)Hex(5)Fuc(1)NeuAc(1)	C[+57], N[+2263]	1429.6	3	4286.78	4287.78	-1	0.1	78	Specific	356.47	240.37	240.37	6	103	>sp|P11279|LAMP1_HUMAN Lysosome-associated membrane glycoprotein 1 OS=Homo sapiens GN=LAMP1 PE=1 SV=3	9237	Caco2P7_diffgpep1.14446.14446.3	controllerType=0 controllerNumber=1 scan=14446	68.3573
14816:4	10	R.SSC[+57.021]GKEN[+2627.947]TSDPSLVIAFGR.G	HexNAc(6)Hex(6)Fuc(1)NeuAc(1)	C[+57], N[+2628]	1163.99	4	4652.93	4652.92	0	2.7	78	Specific	362.03	293.49	21.54	6.31	103	>sp|P11279|LAMP1_HUMAN Lysosome-associated membrane glycoprotein 1 OS=Homo sapiens GN=LAMP1 PE=1 SV=3	9237	Caco2P7_diffgpep1.14357.14357.4	controllerType=0 controllerNumber=1 scan=14357	67.9293
13023:3	10	R.SSC[+57.021]GKEN[+1768.640]TSDPSLVIAFGR.G	HexNAc(4)Hex(5)Fuc(1)NeuAc(0)	C[+57], N[+1769]	1265.22	3	3793.63	3793.61	0	5.5	78	Specific	364.28	287.95	287.95	6.1	103	>sp|P11279|LAMP1_HUMAN Lysosome-associated membrane glycoprotein 1 OS=Homo sapiens GN=LAMP1 PE=1 SV=3	9237	Caco2P7_diffgpep1.12899.12899.3	controllerType=0 controllerNumber=1 scan=12899	60.7236
14967:3	10	R.SSC[+57.021]GKEN[+2059.735]TSDPSLVIAFGR.G	HexNAc(4)Hex(5)Fuc(1)NeuAc(1)	C[+57], N[+2060]	1362.25	3	4084.73	4084.71	0	5	78	Specific	365.63	247.91	30.18	6.05	103	>sp|P11279|LAMP1_HUMAN Lysosome-associated membrane glycoprotein 1 OS=Homo sapiens GN=LAMP1 PE=1 SV=3	9237	Caco2P7_diffgpep1.14487.14487.3	controllerType=0 controllerNumber=1 scan=14487	68.5556
12890:4	10	R.SSC[+57.021]GKEN[+1971.719]TSDPSLVIAFGR.G	HexNAc(5)Hex(5)Fuc(1)NeuAc(0)	C[+57], N[+1972]	999.931	4	3996.7	3996.69	0	3.1	78	Specific	367.5	282.74	282.74	6.31	103	>sp|P11279|LAMP1_HUMAN Lysosome-associated membrane glycoprotein 1 OS=Homo sapiens GN=LAMP1 PE=1 SV=3	9237	Caco2P7_diffgpep1.12782.12782.4	controllerType=0 controllerNumber=1 scan=12782	60.1679
12455:4	10	R.SSC[+57.021]GKEN[+2700.988]TSDPSLVIAFGR.G	HexNAc(5)Hex(5)Fuc(4)NeuAc(1)	C[+57], N[+2701]	1182.5	4	4726.97	4725.96	1	1.5	78	Specific	375.4	266.83	22.02	6.32	103	>sp|P11279|LAMP1_HUMAN Lysosome-associated membrane glycoprotein 1 OS=Homo sapiens GN=LAMP1 PE=1 SV=3	9237	Caco2P7_diffgpep1.12429.12429.4	controllerType=0 controllerNumber=1 scan=12429	58.4604
15084:4	10	R.SSC[+57.021]GKEN[+2262.814]TSDPSLVIAFGR.G	HexNAc(5)Hex(5)Fuc(1)NeuAc(1)	C[+57], N[+2263]	1072.7	4	4287.79	4287.78	0	2.2	78	Specific	382.57	247.21	22.96	6.14	103	>sp|P11279|LAMP1_HUMAN Lysosome-associated membrane glycoprotein 1 OS=Homo sapiens GN=LAMP1 PE=1 SV=3	9237	Caco2P7_diffgpep1.14580.14580.4	controllerType=0 controllerNumber=1 scan=14580	69.0167
17265:4	10	R.SSC[+57.021]GKEN[+2920.062]TSDPSLVIAFGR.G	HexNAc(6)Hex(6)Fuc(3)NeuAc(1)	C[+57], N[+2920]	1236.76	4	4944.03	4945.03	-1	-0.3	78	Specific	406.45	300.91	11.13	6.26	103	>sp|P11279|LAMP1_HUMAN Lysosome-associated membrane glycoprotein 1 OS=Homo sapiens GN=LAMP1 PE=1 SV=3	9237	Caco2P7_diffgpep1.16300.16300.4	controllerType=0 controllerNumber=1 scan=16300	77.436
13143:3	10	R.SSC[+57.021]GKEN[+1444.534]TSDPSLVIAFGR.G	HexNAc(4)Hex(3)Fuc(1)NeuAc(0)	C[+57], N[+1445]	1157.17	3	3469.49	3469.5	0	-5.6	78	Specific	409.81	349.23	349.23	6.14	103	>sp|P11279|LAMP1_HUMAN Lysosome-associated membrane glycoprotein 1 OS=Homo sapiens GN=LAMP1 PE=1 SV=3	9237	Caco2P7_diffgpep1.12994.12994.3	controllerType=0 controllerNumber=1 scan=12994	61.1922
15116:4	10	R.SSC[+57.021]GKEN[+2100.761]TSDPSLVIAFGR.G	HexNAc(5)Hex(4)Fuc(1)NeuAc(1)	C[+57], N[+2101]	1032.19	4	4125.74	4125.73	0	2.5	78	Specific	437.66	300.24	23.7	6.55	103	>sp|P11279|LAMP1_HUMAN Lysosome-associated membrane glycoprotein 1 OS=Homo sapiens GN=LAMP1 PE=1 SV=3	9237	Caco2P7_diffgpep1.14605.14605.4	controllerType=0 controllerNumber=1 scan=14605	69.1405
15104:3	10	R.SSC[+57.021]GKEN[+2100.761]TSDPSLVIAFGR.G	HexNAc(5)Hex(4)Fuc(1)NeuAc(1)	C[+57], N[+2101]	1375.92	3	4125.75	4125.73	0	3.6	78	Specific	453.31	321.83	41.66	7.01	103	>sp|P11279|LAMP1_HUMAN Lysosome-associated membrane glycoprotein 1 OS=Homo sapiens GN=LAMP1 PE=1 SV=3	9237	Caco2P7_diffgpep1.14596.14596.3	controllerType=0 controllerNumber=1 scan=14596	69.0958
13009:3	10	R.SSC[+57.021]GKEN[+1809.666]TSDPSLVIAFGR.G	HexNAc(5)Hex(4)Fuc(1)NeuAc(0)	C[+57], N[+1810]	1278.89	3	3834.65	3834.64	0	4	78	Specific	493.32	420.05	420.05	8.81	103	>sp|P11279|LAMP1_HUMAN Lysosome-associated membrane glycoprotein 1 OS=Homo sapiens GN=LAMP1 PE=1 SV=3	9237	Caco2P7_diffgpep1.12888.12888.3	controllerType=0 controllerNumber=1 scan=12888	60.668
13024:3	10	R.SSC[+57.021]GKEN[+1606.587]TSDPSLVIAFGR.G	HexNAc(4)Hex(4)Fuc(1)NeuAc(0)	C[+57], N[+1607]	1211.19	3	3631.56	3631.56	0	1.3	78	Specific	497.9	367.41	367.41	7.59	103	>sp|P11279|LAMP1_HUMAN Lysosome-associated membrane glycoprotein 1 OS=Homo sapiens GN=LAMP1 PE=1 SV=3	9237	Caco2P7_diffgpep1.12900.12900.3	controllerType=0 controllerNumber=1 scan=12900	60.729
15226:3	10	R.SSC[+57.021]GKEN[+1897.682]TSDPSLVIAFGR.G	HexNAc(4)Hex(4)Fuc(1)NeuAc(1)	C[+57], N[+1898]	1308.22	3	3922.66	3922.65	0	1.1	78	Specific	513.07	368.36	368.36	7.54	103	>sp|P11279|LAMP1_HUMAN Lysosome-associated membrane glycoprotein 1 OS=Homo sapiens GN=LAMP1 PE=1 SV=3	9237	Caco2P7_diffgpep1.14692.14692.3	controllerType=0 controllerNumber=1 scan=14692	69.5644
15086:3	10	R.SSC[+57.021]GKEN[+2262.814]TSDPSLVIAFGR.G	HexNAc(5)Hex(5)Fuc(1)NeuAc(1)	C[+57], N[+2263]	1429.94	3	4287.8	4287.78	0	3.8	78	Specific	517.5	376.99	37.59	7.49	103	>sp|P11279|LAMP1_HUMAN Lysosome-associated membrane glycoprotein 1 OS=Homo sapiens GN=LAMP1 PE=1 SV=3	9237	Caco2P7_diffgpep1.14582.14582.3	controllerType=0 controllerNumber=1 scan=14582	69.0276
13031:3	10	R.SSC[+57.021]GKEN[+1606.587]TSDPSLVIAFGR.G	HexNAc(4)Hex(4)Fuc(1)NeuAc(0)	C[+57], N[+1607]	1211.19	3	3631.56	3631.56	0	0.9	78	Specific	521.05	408.49	408.49	9.04	103	>sp|P11279|LAMP1_HUMAN Lysosome-associated membrane glycoprotein 1 OS=Homo sapiens GN=LAMP1 PE=1 SV=3	9237	Caco2P7_diffgpep1.12907.12907.3	controllerType=0 controllerNumber=1 scan=12907	60.7631
15238:3	10	R.SSC[+57.021]GKEN[+1694.603]TSDPSLVIAFGR.G	HexNAc(3)Hex(4)Fuc(1)NeuAc(1)	C[+57], N[+1695]	1240.53	3	3719.58	3719.57	0	1.7	78	Specific	563.98	414.7	414.7	9.46	103	>sp|P11279|LAMP1_HUMAN Lysosome-associated membrane glycoprotein 1 OS=Homo sapiens GN=LAMP1 PE=1 SV=3	9237	Caco2P7_diffgpep1.14702.14702.3	controllerType=0 controllerNumber=1 scan=14702	69.6147
13045:3	10	R.SSC[+57.021]GKEN[+1403.507]TSDPSLVIAFGR.G	HexNAc(3)Hex(4)Fuc(1)NeuAc(0)	C[+57], N[+1404]	1143.5	3	3428.48	3428.48	0	0.2	78	Specific	588.53	447.06	447.06	10.62	103	>sp|P11279|LAMP1_HUMAN Lysosome-associated membrane glycoprotein 1 OS=Homo sapiens GN=LAMP1 PE=1 SV=3	9237	Caco2P7_diffgpep1.12918.12918.3	controllerType=0 controllerNumber=1 scan=12918	60.8147
12896:3	10	R.SSC[+57.021]GKEN[+1971.719]TSDPSLVIAFGR.G	HexNAc(5)Hex(5)Fuc(1)NeuAc(0)	C[+57], N[+1972]	1332.9	3	3996.7	3996.69	0	2	78	Specific	623.03	464.18	464.18	11.74	103	>sp|P11279|LAMP1_HUMAN Lysosome-associated membrane glycoprotein 1 OS=Homo sapiens GN=LAMP1 PE=1 SV=3	9237	Caco2P7_diffgpep1.12787.12787.3	controllerType=0 controllerNumber=1 scan=12787	60.1909
19008:3	10	K.EN[+2262.814]TSDPSLVIAFGR.G	HexNAc(5)Hex(5)Fuc(1)NeuAc(1)	N[+2263]	1256.87	3	3768.6	3768.57	0	6	83	Specific	302.12	159.63	159.63	5.07	103	>sp|P11279|LAMP1_HUMAN Lysosome-associated membrane glycoprotein 1 OS=Homo sapiens GN=LAMP1 PE=1 SV=3	9237	Caco2P7_diffgpep1.17646.17646.3	controllerType=0 controllerNumber=1 scan=17646	84.0419
11964:3	10	R.GHTLTLN[+2075.730]FTR.N	HexNAc(4)Hex(6)Fuc(0)NeuAc(1)	N[+2076]	1079.13	3	3235.37	3235.35	0	4.6	97	Specific	224.86	86.51	86.51	4.06	103	>sp|P11279|LAMP1_HUMAN Lysosome-associated membrane glycoprotein 1 OS=Homo sapiens GN=LAMP1 PE=1 SV=3	9237	Caco2P7_diffgpep1.11998.11998.3	controllerType=0 controllerNumber=1 scan=11998	56.4402
11821:3	10	R.GHTLTLN[+2075.730]FTR.N	HexNAc(4)Hex(6)Fuc(0)NeuAc(1)	N[+2076]	1079.12	3	3235.35	3235.35	0	0.2	97	Specific	236.95	54.81	54.81	2.78	103	>sp|P11279|LAMP1_HUMAN Lysosome-associated membrane glycoprotein 1 OS=Homo sapiens GN=LAMP1 PE=1 SV=3	9237	Caco2P7_diffgpep1.11861.11861.3	controllerType=0 controllerNumber=1 scan=11861	55.8254
09750:3	10	R.GHTLTLN[+1419.502]FTR.N	HexNAc(3)Hex(5)Fuc(0)NeuAc(0)	N[+1420]	860.381	3	2579.13	2579.12	0	1.2	97	Specific	250.65	73.13	73.13	4.39	103	>sp|P11279|LAMP1_HUMAN Lysosome-associated membrane glycoprotein 1 OS=Homo sapiens GN=LAMP1 PE=1 SV=3	9237	Caco2P7_diffgpep1.10054.10054.3	controllerType=0 controllerNumber=1 scan=10054	47.1783
12005:3	10	R.GHTLTLN[+1710.598]FTR.N	HexNAc(3)Hex(5)Fuc(0)NeuAc(1)	N[+1711]	957.415	3	2870.23	2870.22	0	3.7	97	Specific	269.37	76.8	76.8	3.04	103	>sp|P11279|LAMP1_HUMAN Lysosome-associated membrane glycoprotein 1 OS=Homo sapiens GN=LAMP1 PE=1 SV=3	9237	Caco2P7_diffgpep1.12036.12036.3	controllerType=0 controllerNumber=1 scan=12036	56.6151
11869:3	10	R.GHTLTLN[+2237.783]FTR.N	HexNAc(4)Hex(7)Fuc(0)NeuAc(1)	N[+2238]	1133.14	3	3397.41	3397.4	0	2.8	97	Specific	299.59	101.15	101.15	5.04	103	>sp|P11279|LAMP1_HUMAN Lysosome-associated membrane glycoprotein 1 OS=Homo sapiens GN=LAMP1 PE=1 SV=3	9237	Caco2P7_diffgpep1.11908.11908.3	controllerType=0 controllerNumber=1 scan=11908	56.0331
09603:3	10	R.GHTLTLN[+1540.529]FTR.N	HexNAc(2)Hex(7)Fuc(0)NeuAc(0)	N[+1541]	900.722	3	2700.15	2700.15	0	1	97	Specific	305.08	112.24	112.24	4.49	103	>sp|P11279|LAMP1_HUMAN Lysosome-associated membrane glycoprotein 1 OS=Homo sapiens GN=LAMP1 PE=1 SV=3	9237	Caco2P7_diffgpep1.9935.9935.3	controllerType=0 controllerNumber=1 scan=9935	46.5958
09676:3	10	R.GHTLTLN[+1581.555]FTR.N	HexNAc(3)Hex(6)Fuc(0)NeuAc(0)	N[+1582]	914.399	3	2741.18	2741.18	0	2.3	97	Specific	321.65	108.66	108.66	5.24	103	>sp|P11279|LAMP1_HUMAN Lysosome-associated membrane glycoprotein 1 OS=Homo sapiens GN=LAMP1 PE=1 SV=3	9237	Caco2P7_diffgpep1.9990.9990.3	controllerType=0 controllerNumber=1 scan=9990	46.8701
09921:3	10	R.GHTLTLN[+1663.608]FTR.N	HexNAc(5)Hex(4)Fuc(0)NeuAc(0)	N[+1664]	941.751	3	2823.24	2823.23	0	3.2	97	Specific	337.58	123.53	123.53	5.46	103	>sp|P11279|LAMP1_HUMAN Lysosome-associated membrane glycoprotein 1 OS=Homo sapiens GN=LAMP1 PE=1 SV=3	9237	Caco2P7_diffgpep1.10201.10201.3	controllerType=0 controllerNumber=1 scan=10201	47.8793
09707:3	10	R.GHTLTLN[+1622.582]FTR.N	HexNAc(4)Hex(5)Fuc(0)NeuAc(0)	N[+1623]	928.075	3	2782.21	2782.2	0	3	97	Specific	344.79	124.25	124.25	5.43	103	>sp|P11279|LAMP1_HUMAN Lysosome-associated membrane glycoprotein 1 OS=Homo sapiens GN=LAMP1 PE=1 SV=3	9237	Caco2P7_diffgpep1.10019.10019.3	controllerType=0 controllerNumber=1 scan=10019	47.0119
09554:3	10	R.GHTLTLN[+1540.529]FTR.N	HexNAc(2)Hex(7)Fuc(0)NeuAc(0)	N[+1541]	900.722	3	2700.15	2700.15	0	0.5	97	Specific	346.73	189.99	189.99	5.94	103	>sp|P11279|LAMP1_HUMAN Lysosome-associated membrane glycoprotein 1 OS=Homo sapiens GN=LAMP1 PE=1 SV=3	9237	Caco2P7_diffgpep1.9890.9890.3	controllerType=0 controllerNumber=1 scan=9890	46.3739
09829:3	10	R.GHTLTLN[+1825.661]FTR.N	HexNAc(5)Hex(5)Fuc(0)NeuAc(0)	N[+1826]	995.767	3	2985.29	2985.28	0	1.2	97	Specific	351.31	142.63	142.63	5.82	103	>sp|P11279|LAMP1_HUMAN Lysosome-associated membrane glycoprotein 1 OS=Homo sapiens GN=LAMP1 PE=1 SV=3	9237	Caco2P7_diffgpep1.10123.10123.3	controllerType=0 controllerNumber=1 scan=10123	47.5119
11861:3	10	R.GHTLTLN[+1872.651]FTR.N	HexNAc(3)Hex(6)Fuc(0)NeuAc(1)	N[+1873]	1011.43	3	3032.28	3032.27	0	3.2	97	Specific	357.42	144.37	144.37	5.68	103	>sp|P11279|LAMP1_HUMAN Lysosome-associated membrane glycoprotein 1 OS=Homo sapiens GN=LAMP1 PE=1 SV=3	9237	Caco2P7_diffgpep1.11901.11901.3	controllerType=0 controllerNumber=1 scan=11901	56.0029
09681:3	10	R.GHTLTLN[+1378.476]FTR.N	HexNAc(2)Hex(6)Fuc(0)NeuAc(0)	N[+1378]	846.706	3	2538.1	2538.1	0	2.9	97	Specific	384.55	195.36	195.36	6.04	103	>sp|P11279|LAMP1_HUMAN Lysosome-associated membrane glycoprotein 1 OS=Homo sapiens GN=LAMP1 PE=1 SV=3	9237	Caco2P7_diffgpep1.9995.9995.3	controllerType=0 controllerNumber=1 scan=9995	46.8933
09499:3	10	R.GHTLTLN[+1864.634]FTR.N	HexNAc(2)Hex(9)Fuc(0)NeuAc(0)	N[+1865]	1008.76	3	3024.26	3024.26	0	0.6	97	Specific	409.72	215.14	215.14	6.23	103	>sp|P11279|LAMP1_HUMAN Lysosome-associated membrane glycoprotein 1 OS=Homo sapiens GN=LAMP1 PE=1 SV=3	9237	Caco2P7_diffgpep1.9846.9846.3	controllerType=0 controllerNumber=1 scan=9846	46.1549
12004:3	10	R.GHTLTLN[+1872.651]FTR.N	HexNAc(3)Hex(6)Fuc(0)NeuAc(1)	N[+1873]	1011.43	3	3032.28	3032.27	0	2.5	97	Specific	410.67	289.78	289.78	6.49	103	>sp|P11279|LAMP1_HUMAN Lysosome-associated membrane glycoprotein 1 OS=Homo sapiens GN=LAMP1 PE=1 SV=3	9237	Caco2P7_diffgpep1.12035.12035.3	controllerType=0 controllerNumber=1 scan=12035	56.6094
09855:3	10	R.GHTLTLN[+1622.582]FTR.N	HexNAc(4)Hex(5)Fuc(0)NeuAc(0)	N[+1623]	928.074	3	2782.21	2782.2	0	1.9	97	Specific	478.04	237	237	6.56	103	>sp|P11279|LAMP1_HUMAN Lysosome-associated membrane glycoprotein 1 OS=Homo sapiens GN=LAMP1 PE=1 SV=3	9237	Caco2P7_diffgpep1.10142.10142.3	controllerType=0 controllerNumber=1 scan=10142	47.6029
09796:3	10	R.GHTLTLN[+1216.423]FTR.N	HexNAc(2)Hex(5)Fuc(0)NeuAc(0)	N[+1216]	792.688	3	2376.05	2376.04	0	1.4	97	Specific	495.64	282.65	282.65	6.84	103	>sp|P11279|LAMP1_HUMAN Lysosome-associated membrane glycoprotein 1 OS=Homo sapiens GN=LAMP1 PE=1 SV=3	9237	Caco2P7_diffgpep1.10096.10096.3	controllerType=0 controllerNumber=1 scan=10096	47.3781
09667:3	10	R.GHTLTLN[+1784.634]FTR.N	HexNAc(4)Hex(6)Fuc(0)NeuAc(0)	N[+1785]	982.093	3	2944.26	2944.26	0	2.3	97	Specific	518.85	301.48	301.48	6.82	103	>sp|P11279|LAMP1_HUMAN Lysosome-associated membrane glycoprotein 1 OS=Homo sapiens GN=LAMP1 PE=1 SV=3	9237	Caco2P7_diffgpep1.9982.9982.3	controllerType=0 controllerNumber=1 scan=9982	46.8305
09816:3	10	R.GHTLTLN[+1784.634]FTR.N	HexNAc(4)Hex(6)Fuc(0)NeuAc(0)	N[+1785]	982.092	3	2944.26	2944.26	0	1.5	97	Specific	530.67	323.22	323.22	7.21	103	>sp|P11279|LAMP1_HUMAN Lysosome-associated membrane glycoprotein 1 OS=Homo sapiens GN=LAMP1 PE=1 SV=3	9237	Caco2P7_diffgpep1.10113.10113.3	controllerType=0 controllerNumber=1 scan=10113	47.4622
26825:4	10	R.YSVQLMSFVYNLSDTHLFPN[+2092.745]ASSK.E	HexNAc(4)Hex(7)Fuc(1)NeuAc(0)	N[+2093]	1211.03	4	4841.1	4841.08	0	5	111	Specific	488.04	358.82	18.48	7.19	103	>sp|P11279|LAMP1_HUMAN Lysosome-associated membrane glycoprotein 1 OS=Homo sapiens GN=LAMP1 PE=1 SV=3	9237	Caco2P7_diffgpep1.25460.25460.4	controllerType=0 controllerNumber=1 scan=25460	118.428
00266:3	10	R.KDN[+2262.814]TTVTR.L	HexNAc(5)Hex(5)Fuc(1)NeuAc(1)	N[+2263]	1066.44	3	3197.31	3197.31	0	1.3	247	Specific	269.29	30.75	30.75	3.91	103	>sp|P11279|LAMP1_HUMAN Lysosome-associated membrane glycoprotein 1 OS=Homo sapiens GN=LAMP1 PE=1 SV=3	9237	Caco2P7_diffgpep1.1976.1976.3	controllerType=0 controllerNumber=1 scan=1976	8.9046
06557:3	10	R.LLNINPN[+2498.904]K.T	HexNAc(6)Hex(7)Fuc(1)NeuAc(0)	N[+2499]	1142.16	3	3424.46	3424.45	0	1.9	255	Specific	157.27	97.28	97.28	2.05	103	>sp|P11279|LAMP1_HUMAN Lysosome-associated membrane glycoprotein 1 OS=Homo sapiens GN=LAMP1 PE=1 SV=3	9237	Caco2P7_diffgpep1.7314.7314.3	controllerType=0 controllerNumber=1 scan=7314	33.8331
07583:3	10	R.LLNINPN[+1647.613]K.T	HexNAc(5)Hex(3)Fuc(1)NeuAc(0)	N[+1648]	858.394	3	2573.17	2573.16	0	2.9	255	Specific	160.52	95.05	95.05	2.03	103	>sp|P11279|LAMP1_HUMAN Lysosome-associated membrane glycoprotein 1 OS=Homo sapiens GN=LAMP1 PE=1 SV=3	9237	Caco2P7_diffgpep1.8171.8171.3	controllerType=0 controllerNumber=1 scan=8171	38.059
07462:3	10	R.LLNINPN[+2482.909]K.T	HexNAc(6)Hex(6)Fuc(2)NeuAc(0)	N[+2483]	1136.83	3	3408.47	3408.46	0	2.8	255	Specific	174.19	118	118	2.09	103	>sp|P11279|LAMP1_HUMAN Lysosome-associated membrane glycoprotein 1 OS=Homo sapiens GN=LAMP1 PE=1 SV=3	9237	Caco2P7_diffgpep1.8065.8065.3	controllerType=0 controllerNumber=1 scan=8065	37.5296
07584:3	10	R.LLNINPN[+2174.798]K.T	HexNAc(6)Hex(5)Fuc(1)NeuAc(0)	N[+2175]	1034.12	3	3100.34	3100.34	0	-2.4	255	Specific	186.95	130.19	130.19	2	103	>sp|P11279|LAMP1_HUMAN Lysosome-associated membrane glycoprotein 1 OS=Homo sapiens GN=LAMP1 PE=1 SV=3	9237	Caco2P7_diffgpep1.8172.8172.3	controllerType=0 controllerNumber=1 scan=8172	38.0645
08840:3	10	R.LLNINPN[+2018.708]K.T	HexNAc(3)Hex(6)Fuc(1)NeuAc(1)	N[+2019]	982.093	3	2944.26	2944.25	0	3.2	255	Specific	187.56	118.21	118.21	2.07	103	>sp|P11279|LAMP1_HUMAN Lysosome-associated membrane glycoprotein 1 OS=Homo sapiens GN=LAMP1 PE=1 SV=3	9237	Caco2P7_diffgpep1.9296.9296.3	controllerType=0 controllerNumber=1 scan=9296	43.458
08685:3	10	R.LLNINPN[+2992.083]K.T	HexNAc(5)Hex(5)Fuc(4)NeuAc(2)	N[+2992]	1306.55	3	3917.63	3917.63	0	0.2	255	Specific	192.75	89.87	89.87	2.03	103	>sp|P11279|LAMP1_HUMAN Lysosome-associated membrane glycoprotein 1 OS=Homo sapiens GN=LAMP1 PE=1 SV=3	9237	Caco2P7_diffgpep1.9167.9167.3	controllerType=0 controllerNumber=1 scan=9167	42.8154
06795:3	10	R.LLNINPN[+2538.935]K.T	HexNAc(5)Hex(4)Fuc(4)NeuAc(1)	N[+2539]	1155.5	3	3464.48	3464.48	0	-0.5	255	Specific	192.85	121.41	121.41	2.07	103	>sp|P11279|LAMP1_HUMAN Lysosome-associated membrane glycoprotein 1 OS=Homo sapiens GN=LAMP1 PE=1 SV=3	9237	Caco2P7_diffgpep1.7520.7520.3	controllerType=0 controllerNumber=1 scan=7520	34.834
08751:3	10	R.LLNINPN[+1872.651]K.T	HexNAc(3)Hex(6)Fuc(0)NeuAc(1)	N[+1873]	933.405	3	2798.2	2798.2	0	1.2	255	Specific	213.12	122	122	2.36	103	>sp|P11279|LAMP1_HUMAN Lysosome-associated membrane glycoprotein 1 OS=Homo sapiens GN=LAMP1 PE=1 SV=3	9237	Caco2P7_diffgpep1.9223.9223.3	controllerType=0 controllerNumber=1 scan=9223	43.0954
08383:3	10	R.LLNINPN[+2789.999]K.T	HexNAc(6)Hex(7)Fuc(1)NeuAc(1)	N[+2790]	1239.19	3	3715.56	3715.55	0	2.6	255	Specific	213.49	139.56	139.56	2.32	103	>sp|P11279|LAMP1_HUMAN Lysosome-associated membrane glycoprotein 1 OS=Homo sapiens GN=LAMP1 PE=1 SV=3	9237	Caco2P7_diffgpep1.8892.8892.3	controllerType=0 controllerNumber=1 scan=8892	41.4924
07491:3	10	R.LLNINPN[+1809.666]K.T	HexNAc(5)Hex(4)Fuc(1)NeuAc(0)	N[+1810]	912.412	3	2735.22	2735.21	0	3.2	255	Specific	217.49	125.9	125.9	2.32	103	>sp|P11279|LAMP1_HUMAN Lysosome-associated membrane glycoprotein 1 OS=Homo sapiens GN=LAMP1 PE=1 SV=3	9237	Caco2P7_diffgpep1.8090.8090.3	controllerType=0 controllerNumber=1 scan=8090	37.6518
06823:3	10	R.LLNINPN[+2539.930]K.T	HexNAc(7)Hex(6)Fuc(1)NeuAc(0)	N[+2540]	1155.84	3	3465.49	3465.48	0	5	255	Specific	230.03	79.22	79.22	2.43	103	>sp|P11279|LAMP1_HUMAN Lysosome-associated membrane glycoprotein 1 OS=Homo sapiens GN=LAMP1 PE=1 SV=3	9237	Caco2P7_diffgpep1.7545.7545.3	controllerType=0 controllerNumber=1 scan=7545	34.9536
09039:3	10	R.LLNINPN[+2774.004]K.T	HexNAc(6)Hex(6)Fuc(2)NeuAc(1)	N[+2774]	1233.85	3	3699.55	3699.55	0	-1.2	255	Specific	236.13	151.07	151.07	4.28	103	>sp|P11279|LAMP1_HUMAN Lysosome-associated membrane glycoprotein 1 OS=Homo sapiens GN=LAMP1 PE=1 SV=3	9237	Caco2P7_diffgpep1.9470.9470.3	controllerType=0 controllerNumber=1 scan=9470	44.2994
11253:3	10	R.LLNINPN[+2553.910]K.T	HexNAc(5)Hex(5)Fuc(1)NeuAc(2)	N[+2554]	1160.49	3	3479.47	3479.46	0	3.3	255	Specific	253.02	96.89	96.89	4.28	103	>sp|P11279|LAMP1_HUMAN Lysosome-associated membrane glycoprotein 1 OS=Homo sapiens GN=LAMP1 PE=1 SV=3	9237	Caco2P7_diffgpep1.11357.11357.3	controllerType=0 controllerNumber=1 scan=11357	53.4384
06898:3	10	R.LLNINPN[+2847.021]K.T	HexNAc(7)Hex(7)Fuc(0)NeuAc(1)	N[+2847]	1258.2	3	3772.6	3772.57	0	7.4	255	Specific	259.61	105.25	105.25	3.99	103	>sp|P11279|LAMP1_HUMAN Lysosome-associated membrane glycoprotein 1 OS=Homo sapiens GN=LAMP1 PE=1 SV=3	9237	Caco2P7_diffgpep1.7615.7615.3	controllerType=0 controllerNumber=1 scan=7615	35.2899
09003:3	10	R.LLNINPN[+2262.814]K.T	HexNAc(5)Hex(5)Fuc(1)NeuAc(1)	N[+2263]	1063.46	3	3188.36	3188.36	0	0.5	255	Specific	262.33	153.26	153.26	5.27	103	>sp|P11279|LAMP1_HUMAN Lysosome-associated membrane glycoprotein 1 OS=Homo sapiens GN=LAMP1 PE=1 SV=3	9237	Caco2P7_diffgpep1.9438.9438.3	controllerType=0 controllerNumber=1 scan=9438	44.1381
06444:2	10	R.LLNINPN[+1702.581]K.T	HexNAc(2)Hex(8)Fuc(0)NeuAc(0)	N[+1703]	1314.57	2	2628.14	2628.13	0	2.7	255	Specific	265	39.62	39.62	2.91	103	>sp|P11279|LAMP1_HUMAN Lysosome-associated membrane glycoprotein 1 OS=Homo sapiens GN=LAMP1 PE=1 SV=3	9237	Caco2P7_diffgpep1.7215.7215.2	controllerType=0 controllerNumber=1 scan=7215	33.3679
09237:3	10	R.LLNINPN[+2627.947]K.T	HexNAc(6)Hex(6)Fuc(1)NeuAc(1)	N[+2628]	1185.17	3	3553.5	3553.49	0	1.1	255	Specific	270.71	170.45	170.45	5.32	103	>sp|P11279|LAMP1_HUMAN Lysosome-associated membrane glycoprotein 1 OS=Homo sapiens GN=LAMP1 PE=1 SV=3	9237	Caco2P7_diffgpep1.9622.9622.3	controllerType=0 controllerNumber=1 scan=9622	45.0435
07502:3	10	R.LLNINPN[+2336.851]K.T	HexNAc(6)Hex(6)Fuc(1)NeuAc(0)	N[+2337]	1088.14	3	3262.41	3262.4	0	3.2	255	Specific	284.38	190.66	190.66	5.51	103	>sp|P11279|LAMP1_HUMAN Lysosome-associated membrane glycoprotein 1 OS=Homo sapiens GN=LAMP1 PE=1 SV=3	9237	Caco2P7_diffgpep1.8100.8100.3	controllerType=0 controllerNumber=1 scan=8100	37.7021
07345:2	10	R.LLNINPN[+1768.640]K.T	HexNAc(4)Hex(5)Fuc(1)NeuAc(0)	N[+1769]	1347.61	2	2694.21	2694.19	0	7.1	255	Specific	292.74	32.78	32.78	2.34	103	>sp|P11279|LAMP1_HUMAN Lysosome-associated membrane glycoprotein 1 OS=Homo sapiens GN=LAMP1 PE=1 SV=3	9237	Caco2P7_diffgpep1.7968.7968.2	controllerType=0 controllerNumber=1 scan=7968	37.0513
09473:3	10	R.LLNINPN[+2627.947]K.T	HexNAc(6)Hex(6)Fuc(1)NeuAc(1)	N[+2628]	1185.17	3	3553.5	3553.49	0	2.2	255	Specific	299.96	185.96	185.96	5.51	103	>sp|P11279|LAMP1_HUMAN Lysosome-associated membrane glycoprotein 1 OS=Homo sapiens GN=LAMP1 PE=1 SV=3	9237	Caco2P7_diffgpep1.9823.9823.3	controllerType=0 controllerNumber=1 scan=9823	46.0391
07620:3	10	R.LLNINPN[+2482.909]K.T	HexNAc(6)Hex(6)Fuc(2)NeuAc(0)	N[+2483]	1136.83	3	3408.46	3408.46	0	1.9	255	Specific	300.42	230.07	230.07	5.82	103	>sp|P11279|LAMP1_HUMAN Lysosome-associated membrane glycoprotein 1 OS=Homo sapiens GN=LAMP1 PE=1 SV=3	9237	Caco2P7_diffgpep1.8203.8203.3	controllerType=0 controllerNumber=1 scan=8203	38.2159
07587:3	10	R.LLNINPN[+2174.798]K.T	HexNAc(6)Hex(5)Fuc(1)NeuAc(0)	N[+2175]	1034.12	3	3100.35	3100.34	0	1.8	255	Specific	319	261.21	261.21	5.88	103	>sp|P11279|LAMP1_HUMAN Lysosome-associated membrane glycoprotein 1 OS=Homo sapiens GN=LAMP1 PE=1 SV=3	9237	Caco2P7_diffgpep1.8176.8176.3	controllerType=0 controllerNumber=1 scan=8176	38.0817
08990:3	10	R.LLNINPN[+2627.947]K.T	HexNAc(6)Hex(6)Fuc(1)NeuAc(1)	N[+2628]	1185.17	3	3553.5	3553.49	0	1.4	255	Specific	320.55	222.25	222.25	5.93	103	>sp|P11279|LAMP1_HUMAN Lysosome-associated membrane glycoprotein 1 OS=Homo sapiens GN=LAMP1 PE=1 SV=3	9237	Caco2P7_diffgpep1.9426.9426.3	controllerType=0 controllerNumber=1 scan=9426	44.0834
07393:3	10	R.LLNINPN[+1971.719]K.T	HexNAc(5)Hex(5)Fuc(1)NeuAc(0)	N[+1972]	966.428	3	2897.27	2897.27	0	1.7	255	Specific	336.47	208.71	208.71	5.85	103	>sp|P11279|LAMP1_HUMAN Lysosome-associated membrane glycoprotein 1 OS=Homo sapiens GN=LAMP1 PE=1 SV=3	9237	Caco2P7_diffgpep1.8009.8009.3	controllerType=0 controllerNumber=1 scan=8009	37.2537
06818:2	10	R.LLNINPN[+1581.555]K.T	HexNAc(3)Hex(6)Fuc(0)NeuAc(0)	N[+1582]	1254.05	2	2507.1	2507.1	0	-0.4	255	Specific	336.49	89.33	89.33	4.79	103	>sp|P11279|LAMP1_HUMAN Lysosome-associated membrane glycoprotein 1 OS=Homo sapiens GN=LAMP1 PE=1 SV=3	9237	Caco2P7_diffgpep1.7541.7541.2	controllerType=0 controllerNumber=1 scan=7541	34.9361
06953:2	10	R.LLNINPN[+1216.423]K.T	HexNAc(2)Hex(5)Fuc(0)NeuAc(0)	N[+1216]	1071.49	2	2141.98	2141.97	0	3.8	255	Specific	375.12	145.74	145.74	5.77	103	>sp|P11279|LAMP1_HUMAN Lysosome-associated membrane glycoprotein 1 OS=Homo sapiens GN=LAMP1 PE=1 SV=3	9237	Caco2P7_diffgpep1.7656.7656.2	controllerType=0 controllerNumber=1 scan=7656	35.4928
07047:3	10	R.LLNINPN[+2539.930]K.T	HexNAc(7)Hex(6)Fuc(1)NeuAc(0)	N[+2540]	1155.83	3	3465.48	3465.48	0	1.9	255	Specific	387.4	151.28	151.28	5.7	103	>sp|P11279|LAMP1_HUMAN Lysosome-associated membrane glycoprotein 1 OS=Homo sapiens GN=LAMP1 PE=1 SV=3	9237	Caco2P7_diffgpep1.7731.7731.3	controllerType=0 controllerNumber=1 scan=7731	35.8682
06606:2	10	R.LLNINPN[+1540.529]K.T	HexNAc(2)Hex(7)Fuc(0)NeuAc(0)	N[+1541]	1233.55	2	2466.09	2466.07	0	4.6	255	Specific	394.52	153.44	153.44	5.48	103	>sp|P11279|LAMP1_HUMAN Lysosome-associated membrane glycoprotein 1 OS=Homo sapiens GN=LAMP1 PE=1 SV=3	9237	Caco2P7_diffgpep1.7356.7356.2	controllerType=0 controllerNumber=1 scan=7356	34.0294
06789:3	10	R.LLNINPN[+2701.983]K.T	HexNAc(7)Hex(7)Fuc(1)NeuAc(0)	N[+2702]	1209.85	3	3627.54	3627.53	0	3.5	255	Specific	432.91	255.51	255.51	6.09	103	>sp|P11279|LAMP1_HUMAN Lysosome-associated membrane glycoprotein 1 OS=Homo sapiens GN=LAMP1 PE=1 SV=3	9237	Caco2P7_diffgpep1.7514.7514.3	controllerType=0 controllerNumber=1 scan=7514	34.8063
06711:2	10	R.LLNINPN[+1378.476]K.T	HexNAc(2)Hex(6)Fuc(0)NeuAc(0)	N[+1378]	1152.52	2	2304.03	2304.02	0	5.2	255	Specific	434.24	159.18	159.18	5.56	103	>sp|P11279|LAMP1_HUMAN Lysosome-associated membrane glycoprotein 1 OS=Homo sapiens GN=LAMP1 PE=1 SV=3	9237	Caco2P7_diffgpep1.7445.7445.2	controllerType=0 controllerNumber=1 scan=7445	34.4684
04819:2	11	K.FN[+1540.529]FSK.P	HexNAc(2)Hex(7)Fuc(0)NeuAc(0)	N[+1541]	1091.93	2	2182.86	2182.85	0	4.2	5717	Specific	242.04	43.03	43.03	2.02	31	>sp|Q09666|AHNK_HUMAN Neuroblast differentiation-associated protein AHNAK OS=Homo sapiens GN=AHNAK PE=1 SV=2	592	Caco2P7_diffgpep1.5749.5749.2	controllerType=0 controllerNumber=1 scan=5749	26.4565
04679:2	11	K.FN[+1864.634]FSK.P	HexNAc(2)Hex(9)Fuc(0)NeuAc(0)	N[+1865]	1253.98	2	2506.96	2506.96	0	-0.5	5717	Specific	316.75	69.96	69.96	2.35	31	>sp|Q09666|AHNK_HUMAN Neuroblast differentiation-associated protein AHNAK OS=Homo sapiens GN=AHNAK PE=1 SV=2	592	Caco2P7_diffgpep1.5639.5639.2	controllerType=0 controllerNumber=1 scan=5639	25.9199
04686:2	11	K.FN[+1864.634]FSK.P	HexNAc(2)Hex(9)Fuc(0)NeuAc(0)	N[+1865]	1253.99	2	2506.97	2506.96	0	4.5	5717	Specific	328.97	92.57	92.57	2.52	31	>sp|Q09666|AHNK_HUMAN Neuroblast differentiation-associated protein AHNAK OS=Homo sapiens GN=AHNAK PE=1 SV=2	592	Caco2P7_diffgpep1.5645.5645.2	controllerType=0 controllerNumber=1 scan=5645	25.9484
04518:2	11	K.FN[+1864.634]FSK.P	HexNAc(2)Hex(9)Fuc(0)NeuAc(0)	N[+1865]	1253.99	2	2506.97	2506.96	0	2.5	5717	Specific	361.49	68.21	68.21	2.84	31	>sp|Q09666|AHNK_HUMAN Neuroblast differentiation-associated protein AHNAK OS=Homo sapiens GN=AHNAK PE=1 SV=2	592	Caco2P7_diffgpep1.5515.5515.2	controllerType=0 controllerNumber=1 scan=5515	25.3234
04567:2	11	K.FN[+1702.581]FSK.P	HexNAc(2)Hex(8)Fuc(0)NeuAc(0)	N[+1703]	1172.96	2	2344.91	2344.91	0	1.3	5717	Specific	384.17	61.82	61.82	3.9	31	>sp|Q09666|AHNK_HUMAN Neuroblast differentiation-associated protein AHNAK OS=Homo sapiens GN=AHNAK PE=1 SV=2	592	Caco2P7_diffgpep1.5553.5553.2	controllerType=0 controllerNumber=1 scan=5553	25.5016
20536:3	12	R.TDDEVVQREEEAIQLDGLN[+1540.529]ASQIR.E	HexNAc(2)Hex(7)Fuc(0)NeuAc(0)	N[+1541]	1423.63	3	4268.87	4268.87	0	0.9	44	Specific	215.47	42.35	42.35	2	28	>sp|P14625|ENPL_HUMAN Endoplasmin OS=Homo sapiens GN=HSP90B1 PE=1 SV=1	5313	Caco2P7_diffgpep1.18890.18890.3	controllerType=0 controllerNumber=1 scan=18890	89.9335
20478:3	12	R.TDDEVVQREEEAIQLDGLN[+1702.581]ASQIR.E	HexNAc(2)Hex(8)Fuc(0)NeuAc(0)	N[+1703]	1477.65	3	4430.93	4430.92	0	1.9	44	Specific	333.15	148.51	148.51	6.12	28	>sp|P14625|ENPL_HUMAN Endoplasmin OS=Homo sapiens GN=HSP90B1 PE=1 SV=1	5313	Caco2P7_diffgpep1.18843.18843.3	controllerType=0 controllerNumber=1 scan=18843	89.7017
20508:3	12	R.TDDEVVQREEEAIQLDGLN[+1540.529]ASQIR.E	HexNAc(2)Hex(7)Fuc(0)NeuAc(0)	N[+1541]	1423.63	3	4268.87	4268.87	0	-0.2	44	Specific	377.94	223.66	223.66	6.16	28	>sp|P14625|ENPL_HUMAN Endoplasmin OS=Homo sapiens GN=HSP90B1 PE=1 SV=1	5313	Caco2P7_diffgpep1.18864.18864.3	controllerType=0 controllerNumber=1 scan=18864	89.8079
20632:4	12	R.TDDEVVQREEEAIQLDGLN[+1216.423]ASQIR.E	HexNAc(2)Hex(5)Fuc(0)NeuAc(0)	N[+1216]	986.949	4	3944.77	3944.76	0	3.4	44	Specific	447.32	278.27	278.27	6.5	28	>sp|P14625|ENPL_HUMAN Endoplasmin OS=Homo sapiens GN=HSP90B1 PE=1 SV=1	5313	Caco2P7_diffgpep1.18968.18968.4	controllerType=0 controllerNumber=1 scan=18968	90.31
20513:4	12	R.TDDEVVQREEEAIQLDGLN[+1378.476]ASQIR.E	HexNAc(2)Hex(6)Fuc(0)NeuAc(0)	N[+1378]	1027.46	4	4106.82	4106.81	0	0.5	44	Specific	462.74	241.84	241.84	6.49	28	>sp|P14625|ENPL_HUMAN Endoplasmin OS=Homo sapiens GN=HSP90B1 PE=1 SV=1	5313	Caco2P7_diffgpep1.18869.18869.4	controllerType=0 controllerNumber=1 scan=18869	89.8312
20543:3	12	R.TDDEVVQREEEAIQLDGLN[+1378.476]ASQIR.E	HexNAc(2)Hex(6)Fuc(0)NeuAc(0)	N[+1378]	1369.61	3	4106.82	4106.81	0	0.8	44	Specific	490.49	313.83	313.83	7.03	28	>sp|P14625|ENPL_HUMAN Endoplasmin OS=Homo sapiens GN=HSP90B1 PE=1 SV=1	5313	Caco2P7_diffgpep1.18895.18895.3	controllerType=0 controllerNumber=1 scan=18895	89.9565
20531:4	12	R.TDDEVVQREEEAIQLDGLN[+1540.529]ASQIR.E	HexNAc(2)Hex(7)Fuc(0)NeuAc(0)	N[+1541]	1067.98	4	4268.89	4268.87	0	4.3	44	Specific	522.48	239.82	239.82	6.4	28	>sp|P14625|ENPL_HUMAN Endoplasmin OS=Homo sapiens GN=HSP90B1 PE=1 SV=1	5313	Caco2P7_diffgpep1.18886.18886.4	controllerType=0 controllerNumber=1 scan=18886	89.9118
20530:4	12	R.TDDEVVQREEEAIQLDGLN[+1378.476]ASQIR.E	HexNAc(2)Hex(6)Fuc(0)NeuAc(0)	N[+1378]	1027.46	4	4106.82	4106.81	0	1.2	44	Specific	729.34	446.92	446.92	13.54	28	>sp|P14625|ENPL_HUMAN Endoplasmin OS=Homo sapiens GN=HSP90B1 PE=1 SV=1	5313	Caco2P7_diffgpep1.18885.18885.4	controllerType=0 controllerNumber=1 scan=18885	89.9061
16608:3	12	R.EEEAIQLDGLN[+1702.581]ASQIR.E	HexNAc(2)Hex(8)Fuc(0)NeuAc(0)	N[+1703]	1163.5	3	3488.48	3488.48	0	1.5	52	Specific	497.15	321.66	321.66	7.47	28	>sp|P14625|ENPL_HUMAN Endoplasmin OS=Homo sapiens GN=HSP90B1 PE=1 SV=1	5313	Caco2P7_diffgpep1.15793.15793.3	controllerType=0 controllerNumber=1 scan=15793	74.9149
16773:3	12	R.EEEAIQLDGLN[+1378.476]ASQIR.E	HexNAc(2)Hex(6)Fuc(0)NeuAc(0)	N[+1378]	1055.46	3	3164.37	3164.37	0	-0.9	52	Specific	528.49	303.29	303.29	7.12	28	>sp|P14625|ENPL_HUMAN Endoplasmin OS=Homo sapiens GN=HSP90B1 PE=1 SV=1	5313	Caco2P7_diffgpep1.15918.15918.3	controllerType=0 controllerNumber=1 scan=15918	75.5384
16564:3	12	R.EEEAIQLDGLN[+1702.581]ASQIR.E	HexNAc(2)Hex(8)Fuc(0)NeuAc(0)	N[+1703]	1163.51	3	3488.51	3488.48	0	7.9	52	Specific	569.62	506.72	506.72	8.96	28	>sp|P14625|ENPL_HUMAN Endoplasmin OS=Homo sapiens GN=HSP90B1 PE=1 SV=1	5313	Caco2P7_diffgpep1.15759.15759.3	controllerType=0 controllerNumber=1 scan=15759	74.7466
16738:3	12	R.EEEAIQLDGLN[+1378.476]ASQIR.E	HexNAc(2)Hex(6)Fuc(0)NeuAc(0)	N[+1378]	1055.47	3	3164.38	3164.37	0	2.5	52	Specific	589.49	354.58	354.58	9.23	28	>sp|P14625|ENPL_HUMAN Endoplasmin OS=Homo sapiens GN=HSP90B1 PE=1 SV=1	5313	Caco2P7_diffgpep1.15892.15892.3	controllerType=0 controllerNumber=1 scan=15892	75.409
16739:4	12	R.E[-18.011]EEAIQLDGLN[+2449.899]ASQIR.E	HexNAc(6)Hex(4)Fuc(2)NeuAc(1)	E[-18], N[+2450]	1055.2	4	4217.76	4217.79	0	-5.7	52	Specific	231.33	197.31	197.31	4.6	28	>sp|P14625|ENPL_HUMAN Endoplasmin OS=Homo sapiens GN=HSP90B1 PE=1 SV=1	5313	Caco2P7_diffgpep1.15892.15892.3	controllerType=0 controllerNumber=1 scan=15892	75.409
16455:4	12	K.HNN[+1647.613]DTQHIWESDSNEFSVIADPR.G	HexNAc(5)Hex(3)Fuc(1)NeuAc(0)	N[+1648]	1090.71	4	4359.83	4358.82	1	0.9	215	Specific	132.7	30.51	30.51	2.01	28	>sp|P14625|ENPL_HUMAN Endoplasmin OS=Homo sapiens GN=HSP90B1 PE=1 SV=1	5313	Caco2P7_diffgpep1.15672.15672.4	controllerType=0 controllerNumber=1 scan=15672	74.3162
16619:4	12	K.HNN[+1216.423]DTQHIWESDSNEFSVIADPR.G	HexNAc(2)Hex(5)Fuc(0)NeuAc(0)	N[+1216]	982.665	4	3927.64	3927.63	0	2.2	215	Specific	170.82	85	85	2.02	28	>sp|P14625|ENPL_HUMAN Endoplasmin OS=Homo sapiens GN=HSP90B1 PE=1 SV=1	5313	Caco2P7_diffgpep1.15803.15803.4	controllerType=0 controllerNumber=1 scan=15803	74.9653
16929:4	12	K.HNN[+1702.581]DTQHIWESDSNEFSVIADPR.G	HexNAc(2)Hex(8)Fuc(0)NeuAc(0)	N[+1703]	1104.2	4	4413.79	4413.79	0	0.1	215	Specific	173.36	89.75	89.75	2.41	28	>sp|P14625|ENPL_HUMAN Endoplasmin OS=Homo sapiens GN=HSP90B1 PE=1 SV=1	5313	Caco2P7_diffgpep1.16039.16039.4	controllerType=0 controllerNumber=1 scan=16039	76.139
16301:4	12	K.HNN[+1864.634]DTQHIWESDSNEFSVIADPR.G	HexNAc(2)Hex(9)Fuc(0)NeuAc(0)	N[+1865]	1144.47	4	4574.87	4575.84	-1	5.9	215	Specific	174.2	90.81	90.81	2.34	28	>sp|P14625|ENPL_HUMAN Endoplasmin OS=Homo sapiens GN=HSP90B1 PE=1 SV=1	5313	Caco2P7_diffgpep1.15551.15551.4	controllerType=0 controllerNumber=1 scan=15551	73.7278
16438:3	12	K.HNN[+1216.423]DTQHIWESDSNEFSVIADPR.G	HexNAc(2)Hex(5)Fuc(0)NeuAc(0)	N[+1216]	1309.87	3	3927.59	3927.63	0	-9.4	215	Specific	309.39	185.23	185.23	4.55	28	>sp|P14625|ENPL_HUMAN Endoplasmin OS=Homo sapiens GN=HSP90B1 PE=1 SV=1	5313	Caco2P7_diffgpep1.15657.15657.3	controllerType=0 controllerNumber=1 scan=15657	74.2428
17006:4	12	K.HNN[+1378.476]DTQHIWESDSNEFSVIADPR.G	HexNAc(2)Hex(6)Fuc(0)NeuAc(0)	N[+1378]	1023.18	4	4089.69	4089.68	0	2	215	Specific	336.04	254.8	254.8	6.91	28	>sp|P14625|ENPL_HUMAN Endoplasmin OS=Homo sapiens GN=HSP90B1 PE=1 SV=1	5313	Caco2P7_diffgpep1.16099.16099.4	controllerType=0 controllerNumber=1 scan=16099	76.4385
16775:4	12	K.HNN[+1378.476]DTQHIWESDSNEFSVIADPR.G	HexNAc(2)Hex(6)Fuc(0)NeuAc(0)	N[+1378]	1023.18	4	4089.68	4089.68	0	0.3	215	Specific	340.53	207.91	207.91	6.67	28	>sp|P14625|ENPL_HUMAN Endoplasmin OS=Homo sapiens GN=HSP90B1 PE=1 SV=1	5313	Caco2P7_diffgpep1.15920.15920.4	controllerType=0 controllerNumber=1 scan=15920	75.5492
18105:4	12	K.HNN[+1378.476]DTQHIWESDSNEFSVIADPR.G	HexNAc(2)Hex(6)Fuc(0)NeuAc(0)	N[+1378]	1023.43	4	4090.69	4089.68	1	-0.2	215	Specific	347.82	195.79	195.79	6.4	28	>sp|P14625|ENPL_HUMAN Endoplasmin OS=Homo sapiens GN=HSP90B1 PE=1 SV=1	5313	Caco2P7_diffgpep1.16935.16935.4	controllerType=0 controllerNumber=1 scan=16935	80.6072
18054:4	12	K.HNN[+1378.476]DTQHIWESDSNEFSVIADPR.G	HexNAc(2)Hex(6)Fuc(0)NeuAc(0)	N[+1378]	1023.43	4	4090.68	4089.68	1	-1.9	215	Specific	359	217.23	217.23	6.05	28	>sp|P14625|ENPL_HUMAN Endoplasmin OS=Homo sapiens GN=HSP90B1 PE=1 SV=1	5313	Caco2P7_diffgpep1.16902.16902.4	controllerType=0 controllerNumber=1 scan=16902	80.4474
16138:4	12	K.HNN[+1702.581]DTQHIWESDSNEFSVIADPR.G	HexNAc(2)Hex(8)Fuc(0)NeuAc(0)	N[+1703]	1103.95	4	4412.79	4413.79	-1	1.3	215	Specific	412.86	294.41	294.41	7.34	28	>sp|P14625|ENPL_HUMAN Endoplasmin OS=Homo sapiens GN=HSP90B1 PE=1 SV=1	5313	Caco2P7_diffgpep1.15417.15417.4	controllerType=0 controllerNumber=1 scan=15417	73.0874
16548:4	12	K.HNN[+1378.476]DTQHIWESDSNEFSVIADPR.G	HexNAc(2)Hex(6)Fuc(0)NeuAc(0)	N[+1378]	1023.18	4	4089.69	4089.68	0	2.2	215	Specific	483.2	313.18	313.18	7.6	28	>sp|P14625|ENPL_HUMAN Endoplasmin OS=Homo sapiens GN=HSP90B1 PE=1 SV=1	5313	Caco2P7_diffgpep1.15748.15748.4	controllerType=0 controllerNumber=1 scan=15748	74.6908
16319:3	12	K.HNN[+1378.476]DTQHIWESDSNEFSVIADPR.G	HexNAc(2)Hex(6)Fuc(0)NeuAc(0)	N[+1378]	1363.9	3	4089.69	4089.68	0	2.2	215	Specific	528.11	336.89	336.89	7.06	28	>sp|P14625|ENPL_HUMAN Endoplasmin OS=Homo sapiens GN=HSP90B1 PE=1 SV=1	5313	Caco2P7_diffgpep1.15564.15564.3	controllerType=0 controllerNumber=1 scan=15564	73.7898
16144:4	12	K.HNN[+1702.581]DTQHIWESDSNEFSVIADPR.G	HexNAc(2)Hex(8)Fuc(0)NeuAc(0)	N[+1703]	1103.96	4	4412.8	4413.79	-1	3.5	215	Specific	533.94	388.72	388.72	9.48	28	>sp|P14625|ENPL_HUMAN Endoplasmin OS=Homo sapiens GN=HSP90B1 PE=1 SV=1	5313	Caco2P7_diffgpep1.15422.15422.4	controllerType=0 controllerNumber=1 scan=15422	73.1106
16382:4	12	K.HNN[+1540.529]DTQHIWESDSNEFSVIADPR.G	HexNAc(2)Hex(7)Fuc(0)NeuAc(0)	N[+1541]	1063.69	4	4251.75	4251.74	0	3	215	Specific	546.27	379.97	379.97	8.29	28	>sp|P14625|ENPL_HUMAN Endoplasmin OS=Homo sapiens GN=HSP90B1 PE=1 SV=1	5313	Caco2P7_diffgpep1.15614.15614.4	controllerType=0 controllerNumber=1 scan=15614	74.0258
16198:4	12	K.HNN[+1378.476]DTQHIWESDSNEFSVIADPR.G	HexNAc(2)Hex(6)Fuc(0)NeuAc(0)	N[+1378]	1023.42	4	4090.67	4089.68	1	-5.4	215	Specific	546.65	391.6	391.6	8.78	28	>sp|P14625|ENPL_HUMAN Endoplasmin OS=Homo sapiens GN=HSP90B1 PE=1 SV=1	5313	Caco2P7_diffgpep1.15466.15466.4	controllerType=0 controllerNumber=1 scan=15466	73.3171
16213:4	12	K.HNN[+1540.529]DTQHIWESDSNEFSVIADPR.G	HexNAc(2)Hex(7)Fuc(0)NeuAc(0)	N[+1541]	1063.69	4	4251.74	4251.74	0	0.1	215	Specific	667.97	489.19	489.19	13.11	28	>sp|P14625|ENPL_HUMAN Endoplasmin OS=Homo sapiens GN=HSP90B1 PE=1 SV=1	5313	Caco2P7_diffgpep1.15478.15478.4	controllerType=0 controllerNumber=1 scan=15478	73.3745
16174:4	12	K.HNN[+1864.634]DTQHIWESDSNEFSVIADPR.G	HexNAc(2)Hex(9)Fuc(0)NeuAc(0)	N[+1865]	1144.72	4	4575.85	4575.84	0	1.8	215	Specific	685.28	564.57	564.57	13.23	28	>sp|P14625|ENPL_HUMAN Endoplasmin OS=Homo sapiens GN=HSP90B1 PE=1 SV=1	5313	Caco2P7_diffgpep1.15445.15445.4	controllerType=0 controllerNumber=1 scan=15445	73.2197
16396:4	12	K.HNN[+1216.423]DTQHIWESDSNEFSVIADPR.G	HexNAc(2)Hex(5)Fuc(0)NeuAc(0)	N[+1216]	982.665	4	3927.64	3927.63	0	2.2	215	Specific	734.45	551.95	551.95	14.23	28	>sp|P14625|ENPL_HUMAN Endoplasmin OS=Homo sapiens GN=HSP90B1 PE=1 SV=1	5313	Caco2P7_diffgpep1.15622.15622.4	controllerType=0 controllerNumber=1 scan=15622	74.0694
16326:4	12	K.HNN[+1378.476]DTQHIWESDSNEFSVIADPR.G	HexNAc(2)Hex(6)Fuc(0)NeuAc(0)	N[+1378]	1023.18	4	4089.69	4089.68	0	2.4	215	Specific	740.46	559.42	559.42	14.1	28	>sp|P14625|ENPL_HUMAN Endoplasmin OS=Homo sapiens GN=HSP90B1 PE=1 SV=1	5313	Caco2P7_diffgpep1.15569.15569.4	controllerType=0 controllerNumber=1 scan=15569	73.8127
05285:3	13	K.LN[+2076.750]LTTDPK.F	HexNAc(4)Hex(6)Fuc(2)NeuAc(0)	N[+2077]	993.422	3	2978.25	2978.25	0	0.9	164	Specific	220.69	71.64	71.64	3.81	62	>sp|Q92896|GSLG1_HUMAN Golgi apparatus protein 1 OS=Homo sapiens GN=GLG1 PE=1 SV=2	7201	Caco2P7_diffgpep1.6110.6110.3	controllerType=0 controllerNumber=1 scan=6110	28.2276
05113:3	13	K.LN[+2238.803]LTTDPK.F	HexNAc(4)Hex(7)Fuc(2)NeuAc(0)	N[+2239]	1047.44	3	3140.3	3140.3	0	0.5	164	Specific	254.32	169.53	169.53	5.04	62	>sp|Q92896|GSLG1_HUMAN Golgi apparatus protein 1 OS=Homo sapiens GN=GLG1 PE=1 SV=2	7201	Caco2P7_diffgpep1.5972.5972.3	controllerType=0 controllerNumber=1 scan=5972	27.5486
07442:3	13	K.LN[+2716.983]LTTDPK.F	HexNAc(5)Hex(6)Fuc(3)NeuAc(1)	N[+2717]	1206.83	3	3618.49	3618.48	0	1.5	164	Specific	260.54	79.31	79.31	4.43	62	>sp|Q92896|GSLG1_HUMAN Golgi apparatus protein 1 OS=Homo sapiens GN=GLG1 PE=1 SV=2	7201	Caco2P7_diffgpep1.8051.8051.3	controllerType=0 controllerNumber=1 scan=8051	37.4631
07668:3	13	K.LN[+2424.867]LTTDPK.F	HexNAc(5)Hex(6)Fuc(1)NeuAc(1)	N[+2425]	1109.46	3	3326.37	3326.37	0	1.6	164	Specific	297.38	139.4	139.4	5.15	62	>sp|Q92896|GSLG1_HUMAN Golgi apparatus protein 1 OS=Homo sapiens GN=GLG1 PE=1 SV=2	7201	Caco2P7_diffgpep1.8243.8243.3	controllerType=0 controllerNumber=1 scan=8243	38.417
07723:3	13	K.LN[+2570.925]LTTDPK.F	HexNAc(5)Hex(6)Fuc(2)NeuAc(1)	N[+2571]	1158.15	3	3472.43	3472.42	0	3	164	Specific	303.37	160.93	160.93	5.41	62	>sp|Q92896|GSLG1_HUMAN Golgi apparatus protein 1 OS=Homo sapiens GN=GLG1 PE=1 SV=2	7201	Caco2P7_diffgpep1.8285.8285.3	controllerType=0 controllerNumber=1 scan=8285	38.6253
10135:3	13	K.LN[+2407.852]LTTDPK.F	HexNAc(5)Hex(5)Fuc(0)NeuAc(2)	N[+2408]	1103.79	3	3309.37	3309.35	0	5.3	164	Specific	308.95	125.23	125.23	4.79	62	>sp|Q92896|GSLG1_HUMAN Golgi apparatus protein 1 OS=Homo sapiens GN=GLG1 PE=1 SV=2	7201	Caco2P7_diffgpep1.10374.10374.3	controllerType=0 controllerNumber=1 scan=10374	48.7462
10082:3	13	K.LN[+2715.963]LTTDPK.F	HexNAc(5)Hex(6)Fuc(1)NeuAc(2)	N[+2716]	1206.49	3	3617.47	3617.46	0	1.8	164	Specific	372.69	202.83	202.83	5.94	62	>sp|Q92896|GSLG1_HUMAN Golgi apparatus protein 1 OS=Homo sapiens GN=GLG1 PE=1 SV=2	7201	Caco2P7_diffgpep1.10334.10334.3	controllerType=0 controllerNumber=1 scan=10334	48.5476
07279:3	13	K.LN[+2716.983]LTTDPK.F	HexNAc(5)Hex(6)Fuc(3)NeuAc(1)	N[+2717]	1206.84	3	3618.49	3618.48	0	3.3	164	Specific	411.42	190.23	190.23	5.94	62	>sp|Q92896|GSLG1_HUMAN Golgi apparatus protein 1 OS=Homo sapiens GN=GLG1 PE=1 SV=2	7201	Caco2P7_diffgpep1.7917.7917.3	controllerType=0 controllerNumber=1 scan=7917	36.7983
07416:3	13	K.LN[+2570.925]LTTDPK.F	HexNAc(5)Hex(6)Fuc(2)NeuAc(1)	N[+2571]	1158.15	3	3472.43	3472.42	0	2.3	164	Specific	426.35	148.42	148.42	5.77	62	>sp|Q92896|GSLG1_HUMAN Golgi apparatus protein 1 OS=Homo sapiens GN=GLG1 PE=1 SV=2	7201	Caco2P7_diffgpep1.8028.8028.3	controllerType=0 controllerNumber=1 scan=8028	37.3486
10006:3	13	K.LN[+2862.021]LTTDPK.F	HexNAc(5)Hex(6)Fuc(2)NeuAc(2)	N[+2862]	1255.18	3	3763.53	3763.52	0	2.2	164	Specific	453.17	237.95	237.95	6.32	62	>sp|Q92896|GSLG1_HUMAN Golgi apparatus protein 1 OS=Homo sapiens GN=GLG1 PE=1 SV=2	7201	Caco2P7_diffgpep1.10271.10271.3	controllerType=0 controllerNumber=1 scan=10271	48.2318
07654:4	13	R.GN[+2142.808]ITEYQC[+57.021]HQYITK.M	HexNAc(6)Hex(3)Fuc(3)NeuAc(0)	C[+57], N[+2143]	975.164	4	3897.63	3897.63	0	2.2	209	Specific	125.23	125.23	125.23	2.02	62	>sp|Q92896|GSLG1_HUMAN Golgi apparatus protein 1 OS=Homo sapiens GN=GLG1 PE=1 SV=2	7201	Caco2P7_diffgpep1.8233.8233.4	controllerType=0 controllerNumber=1 scan=8233	38.3668
09064:4	13	R.GN[+3008.078]ITEYQC[+57.021]HQYITK.M	HexNAc(5)Hex(6)Fuc(3)NeuAc(2)	C[+57], N[+3008]	1191.73	4	4763.91	4762.9	1	2.2	209	Specific	177.49	125.3	125.3	2.37	62	>sp|Q92896|GSLG1_HUMAN Golgi apparatus protein 1 OS=Homo sapiens GN=GLG1 PE=1 SV=2	7201	Caco2P7_diffgpep1.9488.9488.4	controllerType=0 controllerNumber=1 scan=9488	44.3858
08107:3	13	R.GN[+1971.719]ITEYQC[+57.021]HQYITK.M	HexNAc(5)Hex(5)Fuc(1)NeuAc(0)	C[+57], N[+1972]	1242.85	3	3726.54	3726.54	0	0.4	209	Specific	195.96	74.15	74.15	2.05	62	>sp|Q92896|GSLG1_HUMAN Golgi apparatus protein 1 OS=Homo sapiens GN=GLG1 PE=1 SV=2	7201	Caco2P7_diffgpep1.8632.8632.3	controllerType=0 controllerNumber=1 scan=8632	40.2508
10945:3	13	R.GN[+2392.877]ITEYQC[+57.021]HQYITK.M	HexNAc(5)Hex(4)Fuc(3)NeuAc(1)	C[+57], N[+2393]	1383.23	3	4147.68	4147.69	0	-3.4	209	Specific	206.02	101.03	45.59	2.02	62	>sp|Q92896|GSLG1_HUMAN Golgi apparatus protein 1 OS=Homo sapiens GN=GLG1 PE=1 SV=2	7201	Caco2P7_diffgpep1.11084.11084.3	controllerType=0 controllerNumber=1 scan=11084	52.1878
09380:3	13	R.GN[+2262.814]ITEYQC[+57.021]HQYITK.M	HexNAc(5)Hex(5)Fuc(1)NeuAc(1)	C[+57], N[+2263]	1339.88	3	4017.64	4017.63	0	1.1	209	Specific	209.11	85.17	48.96	2.31	62	>sp|Q92896|GSLG1_HUMAN Golgi apparatus protein 1 OS=Homo sapiens GN=GLG1 PE=1 SV=2	7201	Caco2P7_diffgpep1.9743.9743.3	controllerType=0 controllerNumber=1 scan=9743	45.6411
07625:3	13	R.GN[+2247.840]ITEYQC[+57.021]HQYITK.M	HexNAc(5)Hex(4)Fuc(4)NeuAc(0)	C[+57], N[+2248]	1334.9	3	4002.69	4002.66	0	8	209	Specific	223.87	162.28	162.28	3.19	62	>sp|Q92896|GSLG1_HUMAN Golgi apparatus protein 1 OS=Homo sapiens GN=GLG1 PE=1 SV=2	7201	Caco2P7_diffgpep1.8208.8208.3	controllerType=0 controllerNumber=1 scan=8208	38.2434
07700:3	13	R.GN[+2570.925]ITEYQC[+57.021]HQYITK.M	HexNAc(5)Hex(6)Fuc(2)NeuAc(1)	C[+57], N[+2571]	1442.93	3	4326.78	4325.74	1	8.8	209	Specific	228.04	129.26	17.01	4.27	62	>sp|Q92896|GSLG1_HUMAN Golgi apparatus protein 1 OS=Homo sapiens GN=GLG1 PE=1 SV=2	7201	Caco2P7_diffgpep1.8267.8267.3	controllerType=0 controllerNumber=1 scan=8267	38.5396
07858:3	13	R.GN[+2117.777]ITEYQC[+57.021]HQYITK.M	HexNAc(5)Hex(5)Fuc(2)NeuAc(0)	C[+57], N[+2118]	1291.54	3	3872.61	3872.59	0	3.8	209	Specific	236.44	145.73	145.73	5.16	62	>sp|Q92896|GSLG1_HUMAN Golgi apparatus protein 1 OS=Homo sapiens GN=GLG1 PE=1 SV=2	7201	Caco2P7_diffgpep1.8407.8407.3	controllerType=0 controllerNumber=1 scan=8407	39.219
07680:3	13	R.GN[+2409.893]ITEYQC[+57.021]HQYITK.M	HexNAc(5)Hex(5)Fuc(4)NeuAc(0)	C[+57], N[+2410]	1389.25	3	4165.73	4164.71	1	3.1	209	Specific	242.83	63.01	63.01	4.42	62	>sp|Q92896|GSLG1_HUMAN Golgi apparatus protein 1 OS=Homo sapiens GN=GLG1 PE=1 SV=2	7201	Caco2P7_diffgpep1.8251.8251.3	controllerType=0 controllerNumber=1 scan=8251	38.4607
10959:4	13	R.GN[+2716.983]ITEYQC[+57.021]HQYITK.M	HexNAc(5)Hex(6)Fuc(3)NeuAc(1)	C[+57], N[+2717]	1118.96	4	4472.82	4471.8	1	3	209	Specific	247.91	39.38	39.38	2.38	62	>sp|Q92896|GSLG1_HUMAN Golgi apparatus protein 1 OS=Homo sapiens GN=GLG1 PE=1 SV=2	7201	Caco2P7_diffgpep1.11095.11095.4	controllerType=0 controllerNumber=1 scan=11095	52.2436
10982:4	13	R.GN[+2554.930]ITEYQC[+57.021]HQYITK.M	HexNAc(5)Hex(5)Fuc(3)NeuAc(1)	C[+57], N[+2555]	1077.94	4	4308.74	4309.75	-1	-0.7	209	Specific	248.45	67.78	16.39	3.96	62	>sp|Q92896|GSLG1_HUMAN Golgi apparatus protein 1 OS=Homo sapiens GN=GLG1 PE=1 SV=2	7201	Caco2P7_diffgpep1.11113.11113.4	controllerType=0 controllerNumber=1 scan=11113	52.3297
10958:4	13	R.GN[+2715.963]ITEYQC[+57.021]HQYITK.M	HexNAc(5)Hex(6)Fuc(1)NeuAc(2)	C[+57], N[+2716]	1118.2	4	4469.79	4470.78	-1	3	209	Specific	249.13	39.38	39.38	2.38	62	>sp|Q92896|GSLG1_HUMAN Golgi apparatus protein 1 OS=Homo sapiens GN=GLG1 PE=1 SV=2	7201	Caco2P7_diffgpep1.11095.11095.4	controllerType=0 controllerNumber=1 scan=11095	52.2436
07968:3	13	R.GN[+1590.592]ITEYQC[+57.021]HQYITK.M	HexNAc(4)Hex(3)Fuc(2)NeuAc(0)	C[+57], N[+1591]	1115.81	3	3345.42	3345.41	0	2.8	209	Specific	277.44	88.83	88.83	4.98	62	>sp|Q92896|GSLG1_HUMAN Golgi apparatus protein 1 OS=Homo sapiens GN=GLG1 PE=1 SV=2	7201	Caco2P7_diffgpep1.8495.8495.3	controllerType=0 controllerNumber=1 scan=8495	39.6421
09120:3	13	R.GN[+2408.872]ITEYQC[+57.021]HQYITK.M	HexNAc(5)Hex(5)Fuc(2)NeuAc(1)	C[+57], N[+2409]	1388.57	3	4163.7	4163.69	0	3.8	209	Specific	284.02	114.88	13.48	5.18	62	>sp|Q92896|GSLG1_HUMAN Golgi apparatus protein 1 OS=Homo sapiens GN=GLG1 PE=1 SV=2	7201	Caco2P7_diffgpep1.9535.9535.3	controllerType=0 controllerNumber=1 scan=9535	44.6212
07634:3	13	R.GN[+2247.840]ITEYQC[+57.021]HQYITK.M	HexNAc(5)Hex(4)Fuc(4)NeuAc(0)	C[+57], N[+2248]	1334.9	3	4002.68	4002.66	0	5.8	209	Specific	301.23	130.04	130.04	5.06	62	>sp|Q92896|GSLG1_HUMAN Golgi apparatus protein 1 OS=Homo sapiens GN=GLG1 PE=1 SV=2	7201	Caco2P7_diffgpep1.8215.8215.3	controllerType=0 controllerNumber=1 scan=8215	38.2774
07872:3	13	R.GN[+1752.645]ITEYQC[+57.021]HQYITK.M	HexNAc(4)Hex(4)Fuc(2)NeuAc(0)	C[+57], N[+1753]	1169.83	3	3507.47	3507.46	0	1.9	209	Specific	304.7	127.71	127.71	4.9	62	>sp|Q92896|GSLG1_HUMAN Golgi apparatus protein 1 OS=Homo sapiens GN=GLG1 PE=1 SV=2	7201	Caco2P7_diffgpep1.8417.8417.3	controllerType=0 controllerNumber=1 scan=8417	39.2693
07882:3	13	R.GN[+1752.645]ITEYQC[+57.021]HQYITK.M	HexNAc(4)Hex(4)Fuc(2)NeuAc(0)	C[+57], N[+1753]	1169.83	3	3507.47	3507.46	0	1.5	209	Specific	341.52	99.79	99.79	5.29	62	>sp|Q92896|GSLG1_HUMAN Golgi apparatus protein 1 OS=Homo sapiens GN=GLG1 PE=1 SV=2	7201	Caco2P7_diffgpep1.8423.8423.3	controllerType=0 controllerNumber=1 scan=8423	39.2976
07790:3	13	R.GN[+1996.750]ITEYQC[+57.021]HQYITK.M	HexNAc(6)Hex(3)Fuc(2)NeuAc(0)	C[+57], N[+1997]	1251.19	3	3751.57	3751.57	0	-0.5	209	Specific	379.37	224.33	224.33	6.05	62	>sp|Q92896|GSLG1_HUMAN Golgi apparatus protein 1 OS=Homo sapiens GN=GLG1 PE=1 SV=2	7201	Caco2P7_diffgpep1.8349.8349.3	controllerType=0 controllerNumber=1 scan=8349	38.9367
09785:3	13	R.GN[+2076.750]ITEYQC[+57.021]HQYITK.M	HexNAc(4)Hex(6)Fuc(2)NeuAc(0)	C[+57], N[+2077]	1277.85	3	3831.54	3831.57	0	-6.5	209	Specific	379.64	156.24	156.24	4.89	62	>sp|Q92896|GSLG1_HUMAN Golgi apparatus protein 1 OS=Homo sapiens GN=GLG1 PE=1 SV=2	7201	Caco2P7_diffgpep1.10086.10086.3	controllerType=0 controllerNumber=1 scan=10086	47.3279
07769:3	13	R.GN[+1955.724]ITEYQC[+57.021]HQYITK.M	HexNAc(5)Hex(4)Fuc(2)NeuAc(0)	C[+57], N[+1956]	1237.52	3	3710.56	3710.54	0	4.8	209	Specific	384.61	204.05	204.05	5.89	62	>sp|Q92896|GSLG1_HUMAN Golgi apparatus protein 1 OS=Homo sapiens GN=GLG1 PE=1 SV=2	7201	Caco2P7_diffgpep1.8328.8328.3	controllerType=0 controllerNumber=1 scan=8328	38.831
09154:3	13	R.GN[+2246.819]ITEYQC[+57.021]HQYITK.M	HexNAc(5)Hex(4)Fuc(2)NeuAc(1)	C[+57], N[+2247]	1334.55	3	4001.63	4001.64	0	-2.6	209	Specific	394.15	152.6	38.72	5.36	62	>sp|Q92896|GSLG1_HUMAN Golgi apparatus protein 1 OS=Homo sapiens GN=GLG1 PE=1 SV=2	7201	Caco2P7_diffgpep1.9562.9562.3	controllerType=0 controllerNumber=1 scan=9562	44.7536
09474:3	13	R.GN[+2076.750]ITEYQC[+57.021]HQYITK.M	HexNAc(4)Hex(6)Fuc(2)NeuAc(0)	C[+57], N[+2077]	1277.85	3	3831.53	3831.57	0	-9	209	Specific	398.6	349.31	349.31	5.71	62	>sp|Q92896|GSLG1_HUMAN Golgi apparatus protein 1 OS=Homo sapiens GN=GLG1 PE=1 SV=2	7201	Caco2P7_diffgpep1.9824.9824.3	controllerType=0 controllerNumber=1 scan=9824	46.0446
09489:3	13	R.GN[+2075.730]ITEYQC[+57.021]HQYITK.M	HexNAc(4)Hex(6)Fuc(0)NeuAc(1)	C[+57], N[+2076]	1277.52	3	3830.54	3830.55	0	-1.9	209	Specific	461.16	391.17	391.17	8.08	62	>sp|Q92896|GSLG1_HUMAN Golgi apparatus protein 1 OS=Homo sapiens GN=GLG1 PE=1 SV=2	7201	Caco2P7_diffgpep1.9836.9836.3	controllerType=0 controllerNumber=1 scan=9836	46.1046
07624:3	13	R.GN[+2142.808]ITEYQC[+57.021]HQYITK.M	HexNAc(6)Hex(3)Fuc(3)NeuAc(0)	C[+57], N[+2143]	1299.89	3	3897.64	3897.63	0	4.9	209	Specific	473.72	282.95	282.95	6.45	62	>sp|Q92896|GSLG1_HUMAN Golgi apparatus protein 1 OS=Homo sapiens GN=GLG1 PE=1 SV=2	7201	Caco2P7_diffgpep1.8207.8207.3	controllerType=0 controllerNumber=1 scan=8207	38.238
09802:3	13	R.GN[+2076.750]ITEYQC[+57.021]HQYITK.M	HexNAc(4)Hex(6)Fuc(2)NeuAc(0)	C[+57], N[+2077]	1277.85	3	3831.53	3831.57	0	-9	209	Specific	492.77	273.57	273.57	5.65	62	>sp|Q92896|GSLG1_HUMAN Golgi apparatus protein 1 OS=Homo sapiens GN=GLG1 PE=1 SV=2	7201	Caco2P7_diffgpep1.10103.10103.3	controllerType=0 controllerNumber=1 scan=10103	47.412
07784:3	13	R.GN[+1955.724]ITEYQC[+57.021]HQYITK.M	HexNAc(5)Hex(4)Fuc(2)NeuAc(0)	C[+57], N[+1956]	1237.52	3	3710.55	3710.54	0	1.6	209	Specific	507.73	241.62	241.62	6.9	62	>sp|Q92896|GSLG1_HUMAN Golgi apparatus protein 1 OS=Homo sapiens GN=GLG1 PE=1 SV=2	7201	Caco2P7_diffgpep1.8344.8344.3	controllerType=0 controllerNumber=1 scan=8344	38.9096
07641:3	13	R.GN[+2142.808]ITEYQC[+57.021]HQYITK.M	HexNAc(6)Hex(3)Fuc(3)NeuAc(0)	C[+57], N[+2143]	1299.88	3	3897.63	3897.63	0	2.3	209	Specific	610.19	376.04	376.04	10.15	62	>sp|Q92896|GSLG1_HUMAN Golgi apparatus protein 1 OS=Homo sapiens GN=GLG1 PE=1 SV=2	7201	Caco2P7_diffgpep1.8223.8223.3	controllerType=0 controllerNumber=1 scan=8223	38.3165
07642:3	13	R.GN[+2101.782]ITEYQC[+57.021]HQYITK.M	HexNAc(5)Hex(4)Fuc(3)NeuAc(0)	C[+57], N[+2102]	1286.21	3	3856.61	3856.6	0	2.5	209	Specific	628.82	406	406	11.54	62	>sp|Q92896|GSLG1_HUMAN Golgi apparatus protein 1 OS=Homo sapiens GN=GLG1 PE=1 SV=2	7201	Caco2P7_diffgpep1.8224.8224.3	controllerType=0 controllerNumber=1 scan=8224	38.3222
22390:4	13	R.LC[+57.021]HTHGWN[+2246.819]ETSEFMPQGAVFSC[+57.021]LYR.H	HexNAc(5)Hex(4)Fuc(2)NeuAc(1)	C[+57]*2, N[+2247]	1319.05	4	5273.16	5274.15	-1	2.5	574	Specific	134.79	83.03	83.03	2.75	62	>sp|Q92896|GSLG1_HUMAN Golgi apparatus protein 1 OS=Homo sapiens GN=GLG1 PE=1 SV=2	7201	Caco2P7_diffgpep1.20494.20494.4	controllerType=0 controllerNumber=1 scan=20494	97.2367
22525:4	13	R.LC[+57.021]HTHGWN[+2246.819]ETSEFMPQGAVFSC[+57.021]LYR.H	HexNAc(5)Hex(4)Fuc(2)NeuAc(1)	C[+57]*2, N[+2247]	1319.3	4	5274.18	5274.15	0	4.8	574	Specific	171.96	61.75	19.51	2.22	62	>sp|Q92896|GSLG1_HUMAN Golgi apparatus protein 1 OS=Homo sapiens GN=GLG1 PE=1 SV=2	7201	Caco2P7_diffgpep1.20617.20617.4	controllerType=0 controllerNumber=1 scan=20617	97.7854
20619:4	13	R.LC[+57.021]HTHGWN[+1996.750]ETSEFMPQGAVFSC[+57.021]LYR.H	HexNAc(6)Hex(3)Fuc(2)NeuAc(0)	C[+57]*2, N[+1997]	1256.79	4	5024.13	5024.08	0	8.6	574	Specific	259.48	129.19	129.19	5	62	>sp|Q92896|GSLG1_HUMAN Golgi apparatus protein 1 OS=Homo sapiens GN=GLG1 PE=1 SV=2	7201	Caco2P7_diffgpep1.18954.18954.4	controllerType=0 controllerNumber=1 scan=18954	90.246
24903:4	13	R.LC[+57.021]HTHGWN[+2221.788]ETSEFMPQGAVFSC[+57.021]LYR.H	HexNAc(4)Hex(6)Fuc(1)NeuAc(1)	C[+57]*2, N[+2222]	1312.77	4	5248.07	5249.12	-1	-9.7	574	Specific	284.05	268.76	268.76	5.46	62	>sp|Q92896|GSLG1_HUMAN Golgi apparatus protein 1 OS=Homo sapiens GN=GLG1 PE=1 SV=2	7201	Caco2P7_diffgpep1.22899.22899.4	controllerType=0 controllerNumber=1 scan=22899	107.903
20533:4	13	R.LC[+57.021]HTHGWN[+2142.808]ETSEFMPQGAVFSC[+57.021]LYR.H	HexNAc(6)Hex(3)Fuc(3)NeuAc(0)	C[+57]*2, N[+2143]	1293.54	4	5171.14	5170.14	1	-1.8	574	Specific	299.6	39.06	39.06	2.32	62	>sp|Q92896|GSLG1_HUMAN Golgi apparatus protein 1 OS=Homo sapiens GN=GLG1 PE=1 SV=2	7201	Caco2P7_diffgpep1.18887.18887.4	controllerType=0 controllerNumber=1 scan=18887	89.9172
20679:4	13	R.LC[+57.021]HTHGWN[+1996.750]ETSEFMPQGAVFSC[+57.021]LYR.H	HexNAc(6)Hex(3)Fuc(2)NeuAc(0)	C[+57]*2, N[+1997]	1256.78	4	5024.1	5024.08	0	3.9	574	Specific	321.21	182.31	182.31	6.64	62	>sp|Q92896|GSLG1_HUMAN Golgi apparatus protein 1 OS=Homo sapiens GN=GLG1 PE=1 SV=2	7201	Caco2P7_diffgpep1.19007.19007.4	controllerType=0 controllerNumber=1 scan=19007	90.5003
24855:4	13	R.LC[+57.021]HTHGWN[+2221.788]ETSEFMPQGAVFSC[+57.021]LYR.H	HexNAc(4)Hex(6)Fuc(1)NeuAc(1)	C[+57]*2, N[+2222]	1313.03	4	5249.1	5249.12	0	-3.2	574	Specific	377.67	297.46	297.46	6.39	62	>sp|Q92896|GSLG1_HUMAN Golgi apparatus protein 1 OS=Homo sapiens GN=GLG1 PE=1 SV=2	7201	Caco2P7_diffgpep1.22840.22840.4	controllerType=0 controllerNumber=1 scan=22840	107.659
20649:4	13	R.LC[+57.021]HTHGWN[+1996.750]ETSEFMPQGAVFSC[+57.021]LYR.H	HexNAc(6)Hex(3)Fuc(2)NeuAc(0)	C[+57]*2, N[+1997]	1256.78	4	5024.1	5024.08	0	2.3	574	Specific	379.86	209.16	209.16	6.77	62	>sp|Q92896|GSLG1_HUMAN Golgi apparatus protein 1 OS=Homo sapiens GN=GLG1 PE=1 SV=2	7201	Caco2P7_diffgpep1.18980.18980.4	controllerType=0 controllerNumber=1 scan=18980	90.3708
24864:4	13	R.LC[+57.021]HTHGWN[+2221.788]ETSEFMPQGAVFSC[+57.021]LYR.H	HexNAc(4)Hex(6)Fuc(1)NeuAc(1)	C[+57]*2, N[+2222]	1313.03	4	5249.11	5249.12	0	-2.9	574	Specific	398.16	275.41	275.41	6.32	62	>sp|Q92896|GSLG1_HUMAN Golgi apparatus protein 1 OS=Homo sapiens GN=GLG1 PE=1 SV=2	7201	Caco2P7_diffgpep1.22848.22848.4	controllerType=0 controllerNumber=1 scan=22848	107.691
20839:4	13	R.LC[+57.021]HTHGWN[+1590.592]ETSEFMPQGAVFSC[+57.021]LYR.H	HexNAc(4)Hex(3)Fuc(2)NeuAc(0)	C[+57]*2, N[+1591]	1155.49	4	4618.93	4617.93	1	0.7	574	Specific	441.86	371.63	371.63	7.88	62	>sp|Q92896|GSLG1_HUMAN Golgi apparatus protein 1 OS=Homo sapiens GN=GLG1 PE=1 SV=2	7201	Caco2P7_diffgpep1.19136.19136.4	controllerType=0 controllerNumber=1 scan=19136	91.126
17884:4	13	K.KVDVVIC[+57.021]LSTTVRN[+2716.983]DTLQEAK.E	HexNAc(5)Hex(6)Fuc(3)NeuAc(1)	C[+57], N[+2717]	1277.32	4	5106.27	5106.26	0	3.1	773	Specific	342.13	164.93	25.91	5.89	62	>sp|Q92896|GSLG1_HUMAN Golgi apparatus protein 1 OS=Homo sapiens GN=GLG1 PE=1 SV=2	7201	Caco2P7_diffgpep1.16775.16775.4	controllerType=0 controllerNumber=1 scan=16775	79.8282
17843:4	13	K.KVDVVIC[+57.021]LSTTVRN[+2863.041]DTLQEAK.E	HexNAc(5)Hex(6)Fuc(4)NeuAc(1)	C[+57], N[+2863]	1313.84	4	5252.34	5252.32	0	4.2	773	Specific	443.53	326.39	16.32	6.94	62	>sp|Q92896|GSLG1_HUMAN Golgi apparatus protein 1 OS=Homo sapiens GN=GLG1 PE=1 SV=2	7201	Caco2P7_diffgpep1.16745.16745.4	controllerType=0 controllerNumber=1 scan=16745	79.6767
29096:4	17	K.DSTPLGDGPMLSLSSITFDSN[+1864.634]GTYVC[+57.021]EASLPTVPVLSR.T	HexNAc(2)Hex(9)Fuc(0)NeuAc(0)	C[+57], N[+1865]	1462.9	4	5848.56	5848.56	0	0.9	399	Specific	451.95	422.75	422.75	9.16	32	>sp|P50895|BCAM_HUMAN Basal cell adhesion molecule OS=Homo sapiens GN=BCAM PE=1 SV=2	1579	Caco2P7_diffgpep1.30590.30590.4	controllerType=0 controllerNumber=1 scan=30590	139.802
29131:4	17	K.DSTPLGDGPMLSLSSITFDSN[+1702.581]GTYVC[+57.021]EASLPTVPVLSR.T	HexNAc(2)Hex(8)Fuc(0)NeuAc(0)	C[+57], N[+1703]	1422.38	4	5686.52	5686.51	0	1.7	399	Specific	477.55	462.73	462.73	9.28	32	>sp|P50895|BCAM_HUMAN Basal cell adhesion molecule OS=Homo sapiens GN=BCAM PE=1 SV=2	1579	Caco2P7_diffgpep1.30776.30776.4	controllerType=0 controllerNumber=1 scan=30776	140.63
29152:4	17	K.DSTPLGDGPMLSLSSITFDSN[+1540.529]GTYVC[+57.021]EASLPTVPVLSR.T	HexNAc(2)Hex(7)Fuc(0)NeuAc(0)	C[+57], N[+1541]	1381.87	4	5524.48	5524.45	0	4.3	399	Specific	481.79	476.96	476.96	9.2	32	>sp|P50895|BCAM_HUMAN Basal cell adhesion molecule OS=Homo sapiens GN=BCAM PE=1 SV=2	1579	Caco2P7_diffgpep1.30859.30859.4	controllerType=0 controllerNumber=1 scan=30859	140.976
29139:4	17	K.DSTPLGDGPMLSLSSITFDSN[+1378.476]GTYVC[+57.021]EASLPTVPVLSR.T	HexNAc(2)Hex(6)Fuc(0)NeuAc(0)	C[+57], N[+1378]	1341.36	4	5362.4	5362.4	0	-0.3	399	Specific	494.34	494.34	494.34	8.99	32	>sp|P50895|BCAM_HUMAN Basal cell adhesion molecule OS=Homo sapiens GN=BCAM PE=1 SV=2	1579	Caco2P7_diffgpep1.30819.30819.4	controllerType=0 controllerNumber=1 scan=30819	140.813
29154:4	17	K.DSTPLGDGPMLSLSSITFDSN[+1378.476]GTYVC[+57.021]EASLPTVPVLSR.T	HexNAc(2)Hex(6)Fuc(0)NeuAc(0)	C[+57], N[+1378]	1341.36	4	5362.41	5362.4	0	2	399	Specific	507.96	475.18	475.18	9.44	32	>sp|P50895|BCAM_HUMAN Basal cell adhesion molecule OS=Homo sapiens GN=BCAM PE=1 SV=2	1579	Caco2P7_diffgpep1.30863.30863.4	controllerType=0 controllerNumber=1 scan=30863	140.993
29120:4	17	K.DSTPLGDGPMLSLSSITFDSN[+1540.529]GTYVC[+57.021]EASLPTVPVLSR.T	HexNAc(2)Hex(7)Fuc(0)NeuAc(0)	C[+57], N[+1541]	1381.87	4	5524.47	5524.45	0	3.4	399	Specific	554.03	542.61	542.61	9.54	32	>sp|P50895|BCAM_HUMAN Basal cell adhesion molecule OS=Homo sapiens GN=BCAM PE=1 SV=2	1579	Caco2P7_diffgpep1.30699.30699.4	controllerType=0 controllerNumber=1 scan=30699	140.263
29142:4	17	K.DSTPLGDGPMLSLSSITFDSN[+1540.529]GTYVC[+57.021]EASLPTVPVLSR.T	HexNAc(2)Hex(7)Fuc(0)NeuAc(0)	C[+57], N[+1541]	1381.87	4	5524.47	5524.45	0	3	399	Specific	555.76	511.2	511.2	9.58	32	>sp|P50895|BCAM_HUMAN Basal cell adhesion molecule OS=Homo sapiens GN=BCAM PE=1 SV=2	1579	Caco2P7_diffgpep1.30828.30828.4	controllerType=0 controllerNumber=1 scan=30828	140.85
29129:4	17	K.DSTPLGDGPMLSLSSITFDSN[+1702.581]GTYVC[+57.021]EASLPTVPVLSR.T	HexNAc(2)Hex(8)Fuc(0)NeuAc(0)	C[+57], N[+1703]	1422.39	4	5686.52	5686.51	0	2.8	399	Specific	612.91	579.3	579.3	12	32	>sp|P50895|BCAM_HUMAN Basal cell adhesion molecule OS=Homo sapiens GN=BCAM PE=1 SV=2	1579	Caco2P7_diffgpep1.30753.30753.4	controllerType=0 controllerNumber=1 scan=30753	140.524
29099:4	17	K.DSTPLGDGPMLSLSSITFDSN[+1702.581]GTYVC[+57.021]EASLPTVPVLSR.T	HexNAc(2)Hex(8)Fuc(0)NeuAc(0)	C[+57], N[+1703]	1422.38	4	5686.51	5686.51	0	0.2	399	Specific	650.74	602.95	602.95	13.01	32	>sp|P50895|BCAM_HUMAN Basal cell adhesion molecule OS=Homo sapiens GN=BCAM PE=1 SV=2	1579	Caco2P7_diffgpep1.30601.30601.4	controllerType=0 controllerNumber=1 scan=30601	139.848
17393:3	17	R.TQN[+2174.798]FTLLVQGSPELK.T	HexNAc(6)Hex(5)Fuc(1)NeuAc(0)	N[+2175]	1283.9	3	3849.69	3849.7	0	-3.7	437	Specific	166.49	160.46	160.46	2.12	32	>sp|P50895|BCAM_HUMAN Basal cell adhesion molecule OS=Homo sapiens GN=BCAM PE=1 SV=2	1579	Caco2P7_diffgpep1.16401.16401.3	controllerType=0 controllerNumber=1 scan=16401	77.9428
17379:4	17	R.TQN[+2831.026]FTLLVQGSPELK.T	HexNAc(7)Hex(6)Fuc(1)NeuAc(1)	N[+2831]	1127.49	4	4506.93	4505.93	1	-2.2	437	Specific	168.89	140.77	26.6	2.03	32	>sp|P50895|BCAM_HUMAN Basal cell adhesion molecule OS=Homo sapiens GN=BCAM PE=1 SV=2	1579	Caco2P7_diffgpep1.16390.16390.4	controllerType=0 controllerNumber=1 scan=16390	77.8882
17378:3	17	R.TQN[+1702.581]FTLLVQGSPELK.T	HexNAc(2)Hex(8)Fuc(0)NeuAc(0)	N[+1703]	1126.51	3	3377.5	3377.49	0	4.2	437	Specific	177.41	157.13	157.13	2.35	32	>sp|P50895|BCAM_HUMAN Basal cell adhesion molecule OS=Homo sapiens GN=BCAM PE=1 SV=2	1579	Caco2P7_diffgpep1.16390.16390.4	controllerType=0 controllerNumber=1 scan=16390	77.8882
17451:4	17	R.TQN[+1825.661]FTLLVQGSPELK.T	HexNAc(5)Hex(5)Fuc(0)NeuAc(0)	N[+1826]	875.899	4	3500.58	3500.57	0	2.5	437	Specific	264.04	236.71	236.71	5.54	32	>sp|P50895|BCAM_HUMAN Basal cell adhesion molecule OS=Homo sapiens GN=BCAM PE=1 SV=2	1579	Caco2P7_diffgpep1.16448.16448.4	controllerType=0 controllerNumber=1 scan=16448	78.194
20342:3	17	R.TQN[+1954.704]FTLLVQGSPELK.T	HexNAc(5)Hex(4)Fuc(0)NeuAc(1)	N[+1955]	1210.55	3	3629.62	3629.61	0	4	437	Specific	321.47	174.36	174.36	5.65	32	>sp|P50895|BCAM_HUMAN Basal cell adhesion molecule OS=Homo sapiens GN=BCAM PE=1 SV=2	1579	Caco2P7_diffgpep1.18737.18737.3	controllerType=0 controllerNumber=1 scan=18737	89.1701
17310:4	17	R.TQN[+2190.793]FTLLVQGSPELK.T	HexNAc(6)Hex(6)Fuc(0)NeuAc(0)	N[+2191]	967.185	4	3865.72	3865.7	0	5.2	437	Specific	322.63	304.92	304.92	5.65	32	>sp|P50895|BCAM_HUMAN Basal cell adhesion molecule OS=Homo sapiens GN=BCAM PE=1 SV=2	1579	Caco2P7_diffgpep1.16335.16335.4	controllerType=0 controllerNumber=1 scan=16335	77.6098
17430:3	17	R.TQN[+1809.666]FTLLVQGSPELK.T	HexNAc(5)Hex(4)Fuc(1)NeuAc(0)	N[+1810]	1162.2	3	3484.58	3484.57	0	1	437	Specific	332.08	270.49	270.49	6.04	32	>sp|P50895|BCAM_HUMAN Basal cell adhesion molecule OS=Homo sapiens GN=BCAM PE=1 SV=2	1579	Caco2P7_diffgpep1.16433.16433.3	controllerType=0 controllerNumber=1 scan=16433	78.1163
20028:3	17	R.TQN[+1913.677]FTLLVQGSPELK.T	HexNAc(4)Hex(5)Fuc(0)NeuAc(1)	N[+1914]	1196.87	3	3588.61	3588.58	0	6.5	437	Specific	351.28	226.12	226.12	5.41	32	>sp|P50895|BCAM_HUMAN Basal cell adhesion molecule OS=Homo sapiens GN=BCAM PE=1 SV=2	1579	Caco2P7_diffgpep1.18489.18489.3	controllerType=0 controllerNumber=1 scan=18489	87.967
17824:3	17	R.TQN[+1460.529]FTLLVQGSPELK.T	HexNAc(4)Hex(4)Fuc(0)NeuAc(0)	N[+1461]	1045.82	3	3135.44	3135.43	0	1	437	Specific	361.35	274.68	274.68	6.13	32	>sp|P50895|BCAM_HUMAN Basal cell adhesion molecule OS=Homo sapiens GN=BCAM PE=1 SV=2	1579	Caco2P7_diffgpep1.16730.16730.3	controllerType=0 controllerNumber=1 scan=16730	79.6033
17271:4	17	R.TQN[+2831.026]FTLLVQGSPELK.T	HexNAc(7)Hex(6)Fuc(1)NeuAc(1)	N[+2831]	1126.99	4	4504.94	4505.93	-1	2.3	437	Specific	370.82	223.08	223.08	5.83	32	>sp|P50895|BCAM_HUMAN Basal cell adhesion molecule OS=Homo sapiens GN=BCAM PE=1 SV=2	1579	Caco2P7_diffgpep1.16303.16303.4	controllerType=0 controllerNumber=1 scan=16303	77.4523
20033:4	17	R.TQN[+2116.756]FTLLVQGSPELK.T	HexNAc(5)Hex(5)Fuc(0)NeuAc(1)	N[+2117]	948.669	4	3791.66	3791.66	0	-1.8	437	Specific	384.22	201.8	201.8	5.23	32	>sp|P50895|BCAM_HUMAN Basal cell adhesion molecule OS=Homo sapiens GN=BCAM PE=1 SV=2	1579	Caco2P7_diffgpep1.18494.18494.4	controllerType=0 controllerNumber=1 scan=18494	87.9903
20330:3	17	R.TQN[+1955.724]FTLLVQGSPELK.T	HexNAc(5)Hex(4)Fuc(2)NeuAc(0)	N[+1956]	1210.88	3	3630.64	3630.63	0	2.8	437	Specific	437.74	366.71	366.71	6.97	32	>sp|P50895|BCAM_HUMAN Basal cell adhesion molecule OS=Homo sapiens GN=BCAM PE=1 SV=2	1579	Caco2P7_diffgpep1.18726.18726.3	controllerType=0 controllerNumber=1 scan=18726	89.1145
20061:3	17	R.TQN[+2116.756]FTLLVQGSPELK.T	HexNAc(5)Hex(5)Fuc(0)NeuAc(1)	N[+2117]	1264.56	3	3791.66	3791.66	0	-1	437	Specific	441.27	331.62	331.62	6.19	32	>sp|P50895|BCAM_HUMAN Basal cell adhesion molecule OS=Homo sapiens GN=BCAM PE=1 SV=2	1579	Caco2P7_diffgpep1.18518.18518.3	controllerType=0 controllerNumber=1 scan=18518	88.1051
17612:3	17	R.TQN[+1216.423]FTLLVQGSPELK.T	HexNAc(2)Hex(5)Fuc(0)NeuAc(0)	N[+1216]	964.449	3	2891.33	2891.33	0	1.4	437	Specific	457.96	293.37	293.37	6.68	32	>sp|P50895|BCAM_HUMAN Basal cell adhesion molecule OS=Homo sapiens GN=BCAM PE=1 SV=2	1579	Caco2P7_diffgpep1.16567.16567.5	controllerType=0 controllerNumber=1 scan=16567	78.7896
17258:3	17	R.TQN[+2336.851]FTLLVQGSPELK.T	HexNAc(6)Hex(6)Fuc(1)NeuAc(0)	N[+2337]	1337.93	3	4011.78	4011.76	0	4.8	437	Specific	464.03	319.52	319.52	6.25	32	>sp|P50895|BCAM_HUMAN Basal cell adhesion molecule OS=Homo sapiens GN=BCAM PE=1 SV=2	1579	Caco2P7_diffgpep1.16295.16295.3	controllerType=0 controllerNumber=1 scan=16295	77.4127
17617:3	17	R.TQN[+1622.582]FTLLVQGSPELK.T	HexNAc(4)Hex(5)Fuc(0)NeuAc(0)	N[+1623]	1099.84	3	3297.5	3297.49	0	2.8	437	Specific	499.75	471.75	471.75	8.54	32	>sp|P50895|BCAM_HUMAN Basal cell adhesion molecule OS=Homo sapiens GN=BCAM PE=1 SV=2	1579	Caco2P7_diffgpep1.16570.16570.3	controllerType=0 controllerNumber=1 scan=16570	78.8059
20001:3	17	R.TQN[+2116.756]FTLLVQGSPELK.T	HexNAc(5)Hex(5)Fuc(0)NeuAc(1)	N[+2117]	1264.57	3	3791.68	3791.66	0	4.9	437	Specific	536.02	391.6	391.6	8.39	32	>sp|P50895|BCAM_HUMAN Basal cell adhesion molecule OS=Homo sapiens GN=BCAM PE=1 SV=2	1579	Caco2P7_diffgpep1.18471.18471.3	controllerType=0 controllerNumber=1 scan=18471	87.8768
17311:3	17	R.TQN[+1971.719]FTLLVQGSPELK.T	HexNAc(5)Hex(5)Fuc(1)NeuAc(0)	N[+1972]	1216.21	3	3646.63	3646.62	0	0.9	437	Specific	536.9	355.41	355.41	7.15	32	>sp|P50895|BCAM_HUMAN Basal cell adhesion molecule OS=Homo sapiens GN=BCAM PE=1 SV=2	1579	Caco2P7_diffgpep1.16336.16336.3	controllerType=0 controllerNumber=1 scan=16336	77.6153
17291:3	17	R.TQN[+2190.793]FTLLVQGSPELK.T	HexNAc(6)Hex(6)Fuc(0)NeuAc(0)	N[+2191]	1289.24	3	3865.71	3865.7	0	2.8	437	Specific	537.88	299.7	299.7	6.81	32	>sp|P50895|BCAM_HUMAN Basal cell adhesion molecule OS=Homo sapiens GN=BCAM PE=1 SV=2	1579	Caco2P7_diffgpep1.16319.16319.3	controllerType=0 controllerNumber=1 scan=16319	77.5313
17318:3	17	R.TQN[+2190.793]FTLLVQGSPELK.T	HexNAc(6)Hex(6)Fuc(0)NeuAc(0)	N[+2191]	1289.24	3	3865.71	3865.7	0	3.2	437	Specific	641.16	453.61	453.61	11.3	32	>sp|P50895|BCAM_HUMAN Basal cell adhesion molecule OS=Homo sapiens GN=BCAM PE=1 SV=2	1579	Caco2P7_diffgpep1.16343.16343.3	controllerType=0 controllerNumber=1 scan=16343	77.6489
17543:3	17	R.TQN[+1663.608]FTLLVQGSPELK.T	HexNAc(5)Hex(4)Fuc(0)NeuAc(0)	N[+1664]	1113.51	3	3338.52	3338.51	0	2.3	437	Specific	752.96	509.94	509.94	14.3	32	>sp|P50895|BCAM_HUMAN Basal cell adhesion molecule OS=Homo sapiens GN=BCAM PE=1 SV=2	1579	Caco2P7_diffgpep1.16518.16518.3	controllerType=0 controllerNumber=1 scan=16518	78.5409
17454:3	17	R.TQN[+1825.661]FTLLVQGSPELK.T	HexNAc(5)Hex(5)Fuc(0)NeuAc(0)	N[+1826]	1167.53	3	3500.57	3500.57	0	0.5	437	Specific	760.46	555.28	555.28	14.31	32	>sp|P50895|BCAM_HUMAN Basal cell adhesion molecule OS=Homo sapiens GN=BCAM PE=1 SV=2	1579	Caco2P7_diffgpep1.16451.16451.3	controllerType=0 controllerNumber=1 scan=16451	78.2062
17307:3	17	R.TQN[+1864.634]FTLLVQGSPELK.T	HexNAc(2)Hex(9)Fuc(0)NeuAc(0)	N[+1865]	1180.52	3	3539.54	3539.54	0	0.5	437	Specific	834.31	561.1	561.1	15.31	32	>sp|P50895|BCAM_HUMAN Basal cell adhesion molecule OS=Homo sapiens GN=BCAM PE=1 SV=2	1579	Caco2P7_diffgpep1.16333.16333.3	controllerType=0 controllerNumber=1 scan=16333	77.5986
25410:4	18	R.AFSN[+1987.714]SSYVLNPTTGELVFDPLSASDTGEYSC[+57.021]EAR.N	HexNAc(5)Hex(6)Fuc(0)NeuAc(0)	C[+57], N[+1988]	1418.86	4	5672.43	5672.38	0	8.4	182	Specific	192.83	189.64	189.64	2.52	28	>sp|Q9Y624|JAM1_HUMAN Junctional adhesion molecule A OS=Homo sapiens GN=F11R PE=1 SV=1	8421	Caco2P7_diffgpep1.23565.23565.4	controllerType=0 controllerNumber=1 scan=23565	110.625
25535:4	18	R.AFSN[+1784.634]SSYVLNPTTGELVFDPLSASDTGEYSC[+57.021]EAR.N	HexNAc(4)Hex(6)Fuc(0)NeuAc(0)	C[+57], N[+1785]	1368.09	4	5469.32	5469.3	0	3.8	182	Specific	214.68	214.68	214.68	4.15	28	>sp|Q9Y624|JAM1_HUMAN Junctional adhesion molecule A OS=Homo sapiens GN=F11R PE=1 SV=1	8421	Caco2P7_diffgpep1.23701.23701.4	controllerType=0 controllerNumber=1 scan=23701	111.207
27048:4	18	R.AFSN[+2279.830]SSYVLNPTTGELVFDPLSASDTGEYSC[+57.021]EAR.N	HexNAc(5)Hex(6)Fuc(2)NeuAc(0)	C[+57], N[+2280]	1492.13	4	5965.51	5964.49	1	2.1	182	Specific	229.24	197.62	197.62	5.66	28	>sp|Q9Y624|JAM1_HUMAN Junctional adhesion molecule A OS=Homo sapiens GN=F11R PE=1 SV=1	8421	Caco2P7_diffgpep1.25778.25778.3	controllerType=0 controllerNumber=1 scan=25778	119.746
25330:4	18	R.AFSN[+1913.677]SSYVLNPTTGELVFDPLSASDTGEYSC[+57.021]EAR.N	HexNAc(4)Hex(5)Fuc(0)NeuAc(1)	C[+57], N[+1914]	1400.35	4	5598.39	5598.34	0	8	182	Specific	234.11	228.69	17.37	5.04	28	>sp|Q9Y624|JAM1_HUMAN Junctional adhesion molecule A OS=Homo sapiens GN=F11R PE=1 SV=1	8421	Caco2P7_diffgpep1.23465.23465.4	controllerType=0 controllerNumber=1 scan=23465	110.207
27040:4	18	R.AFSN[+2221.788]SSYVLNPTTGELVFDPLSASDTGEYSC[+57.021]EAR.N	HexNAc(4)Hex(6)Fuc(1)NeuAc(1)	C[+57], N[+2222]	1477.38	4	5906.48	5906.45	0	5.2	182	Specific	246.49	228.63	228.63	5.48	28	>sp|Q9Y624|JAM1_HUMAN Junctional adhesion molecule A OS=Homo sapiens GN=F11R PE=1 SV=1	8421	Caco2P7_diffgpep1.25772.25772.4	controllerType=0 controllerNumber=1 scan=25772	119.718
25337:4	18	R.AFSN[+1913.677]SSYVLNPTTGELVFDPLSASDTGEYSC[+57.021]EAR.N	HexNAc(4)Hex(5)Fuc(0)NeuAc(1)	C[+57], N[+1914]	1400.6	4	5599.37	5598.34	1	4.1	182	Specific	270.16	270.16	16.66	6.12	28	>sp|Q9Y624|JAM1_HUMAN Junctional adhesion molecule A OS=Homo sapiens GN=F11R PE=1 SV=1	8421	Caco2P7_diffgpep1.23471.23471.4	controllerType=0 controllerNumber=1 scan=23471	110.236
25514:4	18	R.AFSN[+1768.640]SSYVLNPTTGELVFDPLSASDTGEYSC[+57.021]EAR.N	HexNAc(4)Hex(5)Fuc(1)NeuAc(0)	C[+57], N[+1769]	1364.08	4	5453.28	5453.3	0	-4.2	182	Specific	308.28	295.98	295.98	5.42	28	>sp|Q9Y624|JAM1_HUMAN Junctional adhesion molecule A OS=Homo sapiens GN=F11R PE=1 SV=1	8421	Caco2P7_diffgpep1.23678.23678.4	controllerType=0 controllerNumber=1 scan=23678	111.105
25380:4	18	R.AFSN[+1971.719]SSYVLNPTTGELVFDPLSASDTGEYSC[+57.021]EAR.N	HexNAc(5)Hex(5)Fuc(1)NeuAc(0)	C[+57], N[+1972]	1414.86	4	5656.4	5656.38	0	3	182	Specific	320.74	320.74	320.74	6.68	28	>sp|Q9Y624|JAM1_HUMAN Junctional adhesion molecule A OS=Homo sapiens GN=F11R PE=1 SV=1	8421	Caco2P7_diffgpep1.23517.23517.4	controllerType=0 controllerNumber=1 scan=23517	110.43
25434:4	18	R.AFSN[+1768.640]SSYVLNPTTGELVFDPLSASDTGEYSC[+57.021]EAR.N	HexNAc(4)Hex(5)Fuc(1)NeuAc(0)	C[+57], N[+1769]	1363.84	4	5452.34	5453.3	-1	6.3	182	Specific	329.3	329.3	329.3	6.21	28	>sp|Q9Y624|JAM1_HUMAN Junctional adhesion molecule A OS=Homo sapiens GN=F11R PE=1 SV=1	8421	Caco2P7_diffgpep1.23592.23592.4	controllerType=0 controllerNumber=1 scan=23592	110.742
28349:4	18	R.AFSN[+2553.910]SSYVLNPTTGELVFDPLSASDTGEYSC[+57.021]EAR.N	HexNAc(5)Hex(5)Fuc(1)NeuAc(2)	C[+57], N[+2554]	1560.15	4	6237.6	6238.57	-1	3.9	182	Specific	357.29	324.79	324.79	6.61	28	>sp|Q9Y624|JAM1_HUMAN Junctional adhesion molecule A OS=Homo sapiens GN=F11R PE=1 SV=1	8421	Caco2P7_diffgpep1.28179.28179.4	controllerType=0 controllerNumber=1 scan=28179	129.625
27003:4	18	R.AFSN[+2076.750]SSYVLNPTTGELVFDPLSASDTGEYSC[+57.021]EAR.N	HexNAc(4)Hex(6)Fuc(2)NeuAc(0)	C[+57], N[+2077]	1441.12	4	5761.46	5761.41	0	7.8	182	Specific	391.23	344.24	344.24	6.33	28	>sp|Q9Y624|JAM1_HUMAN Junctional adhesion molecule A OS=Homo sapiens GN=F11R PE=1 SV=1	8421	Caco2P7_diffgpep1.25735.25735.4	controllerType=0 controllerNumber=1 scan=25735	119.556
25381:4	18	R.AFSN[+1768.640]SSYVLNPTTGELVFDPLSASDTGEYSC[+57.021]EAR.N	HexNAc(4)Hex(5)Fuc(1)NeuAc(0)	C[+57], N[+1769]	1363.84	4	5452.34	5453.3	-1	7.6	182	Specific	411.17	366.31	366.31	6.68	28	>sp|Q9Y624|JAM1_HUMAN Junctional adhesion molecule A OS=Homo sapiens GN=F11R PE=1 SV=1	8421	Caco2P7_diffgpep1.23518.23518.4	controllerType=0 controllerNumber=1 scan=23518	110.436
25480:4	18	R.AFSN[+1809.666]SSYVLNPTTGELVFDPLSASDTGEYSC[+57.021]EAR.N	HexNAc(5)Hex(4)Fuc(1)NeuAc(0)	C[+57], N[+1810]	1374.1	4	5493.36	5494.33	-1	6.1	182	Specific	417.67	380.73	380.73	8.19	28	>sp|Q9Y624|JAM1_HUMAN Junctional adhesion molecule A OS=Homo sapiens GN=F11R PE=1 SV=1	8421	Caco2P7_diffgpep1.23634.23634.4	controllerType=0 controllerNumber=1 scan=23634	110.929
25476:4	18	R.AFSN[+1809.666]SSYVLNPTTGELVFDPLSASDTGEYSC[+57.021]EAR.N	HexNAc(5)Hex(4)Fuc(1)NeuAc(0)	C[+57], N[+1810]	1374.34	4	5494.34	5494.33	0	2.4	182	Specific	423.94	421.61	421.61	8.7	28	>sp|Q9Y624|JAM1_HUMAN Junctional adhesion molecule A OS=Homo sapiens GN=F11R PE=1 SV=1	8421	Caco2P7_diffgpep1.23631.23631.4	controllerType=0 controllerNumber=1 scan=23631	110.916
26942:4	18	R.AFSN[+2059.735]SSYVLNPTTGELVFDPLSASDTGEYSC[+57.021]EAR.N	HexNAc(4)Hex(5)Fuc(1)NeuAc(1)	C[+57], N[+2060]	1436.86	4	5744.42	5744.4	0	2.8	182	Specific	430.68	347.02	26.67	7.11	28	>sp|Q9Y624|JAM1_HUMAN Junctional adhesion molecule A OS=Homo sapiens GN=F11R PE=1 SV=1	8421	Caco2P7_diffgpep1.25644.25644.4	controllerType=0 controllerNumber=1 scan=25644	119.19
28346:4	18	R.AFSN[+2367.846]SSYVLNPTTGELVFDPLSASDTGEYSC[+57.021]EAR.N	HexNAc(4)Hex(6)Fuc(2)NeuAc(1)	C[+57], N[+2368]	1513.89	4	6052.54	6052.51	0	4.1	182	Specific	432.29	389.44	389.44	8.67	28	>sp|Q9Y624|JAM1_HUMAN Junctional adhesion molecule A OS=Homo sapiens GN=F11R PE=1 SV=1	8421	Caco2P7_diffgpep1.28173.28173.4	controllerType=0 controllerNumber=1 scan=28173	129.603
27143:4	18	R.AFSN[+2100.761]SSYVLNPTTGELVFDPLSASDTGEYSC[+57.021]EAR.N	HexNAc(5)Hex(4)Fuc(1)NeuAc(1)	C[+57], N[+2101]	1447.11	4	5785.44	5785.43	0	2	182	Specific	458.17	441.67	31.99	8.92	28	>sp|Q9Y624|JAM1_HUMAN Junctional adhesion molecule A OS=Homo sapiens GN=F11R PE=1 SV=1	8421	Caco2P7_diffgpep1.25874.25874.4	controllerType=0 controllerNumber=1 scan=25874	120.165
25477:4	18	R.AFSN[+1930.692]SSYVLNPTTGELVFDPLSASDTGEYSC[+57.021]EAR.N	HexNAc(4)Hex(6)Fuc(1)NeuAc(0)	C[+57], N[+1931]	1404.6	4	5615.37	5615.36	0	1.9	182	Specific	462.51	462.51	462.51	8.92	28	>sp|Q9Y624|JAM1_HUMAN Junctional adhesion molecule A OS=Homo sapiens GN=F11R PE=1 SV=1	8421	Caco2P7_diffgpep1.23633.23633.4	controllerType=0 controllerNumber=1 scan=23633	110.923
25391:4	18	R.AFSN[+1768.640]SSYVLNPTTGELVFDPLSASDTGEYSC[+57.021]EAR.N	HexNAc(4)Hex(5)Fuc(1)NeuAc(0)	C[+57], N[+1769]	1364.08	4	5453.32	5453.3	0	2.5	182	Specific	470.42	442.67	442.67	8.78	28	>sp|Q9Y624|JAM1_HUMAN Junctional adhesion molecule A OS=Homo sapiens GN=F11R PE=1 SV=1	8421	Caco2P7_diffgpep1.23532.23532.4	controllerType=0 controllerNumber=1 scan=23532	110.493
26961:4	18	R.AFSN[+2278.809]SSYVLNPTTGELVFDPLSASDTGEYSC[+57.021]EAR.N	HexNAc(5)Hex(6)Fuc(0)NeuAc(1)	C[+57], N[+2279]	1491.63	4	5963.51	5963.47	0	6.7	182	Specific	480.56	419.27	28.58	8.36	28	>sp|Q9Y624|JAM1_HUMAN Junctional adhesion molecule A OS=Homo sapiens GN=F11R PE=1 SV=1	8421	Caco2P7_diffgpep1.25671.25671.4	controllerType=0 controllerNumber=1 scan=25671	119.297
27070:4	18	R.AFSN[+2059.735]SSYVLNPTTGELVFDPLSASDTGEYSC[+57.021]EAR.N	HexNAc(4)Hex(5)Fuc(1)NeuAc(1)	C[+57], N[+2060]	1436.85	4	5744.37	5744.4	0	-5.9	182	Specific	491.92	457.38	42.4	7.97	28	>sp|Q9Y624|JAM1_HUMAN Junctional adhesion molecule A OS=Homo sapiens GN=F11R PE=1 SV=1	8421	Caco2P7_diffgpep1.25798.25798.4	controllerType=0 controllerNumber=1 scan=25798	119.836
28378:5	18	R.AFSN[+2350.830]SSYVLNPTTGELVFDPLSASDTGEYSC[+57.021]EAR.N	HexNAc(4)Hex(5)Fuc(1)NeuAc(2)	C[+57], N[+2351]	1207.71	5	6034.52	6035.49	-1	5	182	Specific	492.88	492.88	492.88	8.12	28	>sp|Q9Y624|JAM1_HUMAN Junctional adhesion molecule A OS=Homo sapiens GN=F11R PE=1 SV=1	8421	Caco2P7_diffgpep1.28235.28235.5	controllerType=0 controllerNumber=1 scan=28235	129.855
25547:4	18	R.AFSN[+1768.640]SSYVLNPTTGELVFDPLSASDTGEYSC[+57.021]EAR.N	HexNAc(4)Hex(5)Fuc(1)NeuAc(0)	C[+57], N[+1769]	1364.34	4	5454.34	5453.3	1	6.8	182	Specific	498.89	362.43	362.43	6.96	28	>sp|Q9Y624|JAM1_HUMAN Junctional adhesion molecule A OS=Homo sapiens GN=F11R PE=1 SV=1	8421	Caco2P7_diffgpep1.23721.23721.4	controllerType=0 controllerNumber=1 scan=23721	111.289
26938:4	18	R.AFSN[+2059.735]SSYVLNPTTGELVFDPLSASDTGEYSC[+57.021]EAR.N	HexNAc(4)Hex(5)Fuc(1)NeuAc(1)	C[+57], N[+2060]	1436.86	4	5744.4	5744.4	0	0.4	182	Specific	538.17	532.87	40.6	9.07	28	>sp|Q9Y624|JAM1_HUMAN Junctional adhesion molecule A OS=Homo sapiens GN=F11R PE=1 SV=1	8421	Caco2P7_diffgpep1.25637.25637.4	controllerType=0 controllerNumber=1 scan=25637	119.162
26999:4	18	R.AFSN[+2262.814]SSYVLNPTTGELVFDPLSASDTGEYSC[+57.021]EAR.N	HexNAc(5)Hex(5)Fuc(1)NeuAc(1)	C[+57], N[+2263]	1487.63	4	5947.49	5947.48	0	2.6	182	Specific	549.29	529.52	24.6	9.22	28	>sp|Q9Y624|JAM1_HUMAN Junctional adhesion molecule A OS=Homo sapiens GN=F11R PE=1 SV=1	8421	Caco2P7_diffgpep1.25727.25727.4	controllerType=0 controllerNumber=1 scan=25727	119.525
27002:4	18	R.AFSN[+2018.708]SSYVLNPTTGELVFDPLSASDTGEYSC[+57.021]EAR.N	HexNAc(3)Hex(6)Fuc(1)NeuAc(1)	C[+57], N[+2019]	1426.6	4	5703.39	5703.37	0	3.3	182	Specific	561.46	541.83	541.83	9.33	28	>sp|Q9Y624|JAM1_HUMAN Junctional adhesion molecule A OS=Homo sapiens GN=F11R PE=1 SV=1	8421	Caco2P7_diffgpep1.25732.25732.4	controllerType=0 controllerNumber=1 scan=25732	119.545
25515:4	18	R.AFSN[+1565.560]SSYVLNPTTGELVFDPLSASDTGEYSC[+57.021]EAR.N	HexNAc(3)Hex(5)Fuc(1)NeuAc(0)	C[+57], N[+1566]	1313.06	4	5249.23	5250.22	-1	1	182	Specific	582	573.6	573.6	10.64	28	>sp|Q9Y624|JAM1_HUMAN Junctional adhesion molecule A OS=Homo sapiens GN=F11R PE=1 SV=1	8421	Caco2P7_diffgpep1.23679.23679.4	controllerType=0 controllerNumber=1 scan=23679	111.11
28356:4	18	R.AFSN[+2367.846]SSYVLNPTTGELVFDPLSASDTGEYSC[+57.021]EAR.N	HexNAc(4)Hex(6)Fuc(2)NeuAc(1)	C[+57], N[+2368]	1513.89	4	6052.53	6052.51	0	3.6	182	Specific	583.37	545.63	545.63	10.61	28	>sp|Q9Y624|JAM1_HUMAN Junctional adhesion molecule A OS=Homo sapiens GN=F11R PE=1 SV=1	8421	Caco2P7_diffgpep1.28198.28198.4	controllerType=0 controllerNumber=1 scan=28198	129.701
27190:4	18	R.AFSN[+1694.603]SSYVLNPTTGELVFDPLSASDTGEYSC[+57.021]EAR.N	HexNAc(3)Hex(4)Fuc(1)NeuAc(1)	C[+57], N[+1695]	1345.83	4	5380.29	5379.27	1	3.4	182	Specific	583.61	555.89	555.89	10.61	28	>sp|Q9Y624|JAM1_HUMAN Junctional adhesion molecule A OS=Homo sapiens GN=F11R PE=1 SV=1	8421	Caco2P7_diffgpep1.25946.25946.4	controllerType=0 controllerNumber=1 scan=25946	120.463
27209:4	18	R.AFSN[+1694.603]SSYVLNPTTGELVFDPLSASDTGEYSC[+57.021]EAR.N	HexNAc(3)Hex(4)Fuc(1)NeuAc(1)	C[+57], N[+1695]	1345.58	4	5379.28	5379.27	0	3.3	182	Specific	599.18	566.4	566.4	10.61	28	>sp|Q9Y624|JAM1_HUMAN Junctional adhesion molecule A OS=Homo sapiens GN=F11R PE=1 SV=1	8421	Caco2P7_diffgpep1.25977.25977.4	controllerType=0 controllerNumber=1 scan=25977	120.589
27124:4	18	R.AFSN[+1872.651]SSYVLNPTTGELVFDPLSASDTGEYSC[+57.021]EAR.N	HexNAc(3)Hex(6)Fuc(0)NeuAc(1)	C[+57], N[+1873]	1390.09	4	5557.34	5557.32	0	5	182	Specific	610.15	574.91	23.77	11.31	28	>sp|Q9Y624|JAM1_HUMAN Junctional adhesion molecule A OS=Homo sapiens GN=F11R PE=1 SV=1	8421	Caco2P7_diffgpep1.25852.25852.4	controllerType=0 controllerNumber=1 scan=25852	120.069
27044:4	18	R.AFSN[+2262.814]SSYVLNPTTGELVFDPLSASDTGEYSC[+57.021]EAR.N	HexNAc(5)Hex(5)Fuc(1)NeuAc(1)	C[+57], N[+2263]	1487.38	4	5946.49	5947.48	-1	2	182	Specific	673.37	636.35	636.35	12.76	28	>sp|Q9Y624|JAM1_HUMAN Junctional adhesion molecule A OS=Homo sapiens GN=F11R PE=1 SV=1	8421	Caco2P7_diffgpep1.25776.25776.4	controllerType=0 controllerNumber=1 scan=25776	119.735
27139:4	18	R.AFSN[+1872.651]SSYVLNPTTGELVFDPLSASDTGEYSC[+57.021]EAR.N	HexNAc(3)Hex(6)Fuc(0)NeuAc(1)	C[+57], N[+1873]	1390.09	4	5557.34	5557.32	0	5.3	182	Specific	716.2	690.45	24.73	13.31	28	>sp|Q9Y624|JAM1_HUMAN Junctional adhesion molecule A OS=Homo sapiens GN=F11R PE=1 SV=1	8421	Caco2P7_diffgpep1.25869.25869.4	controllerType=0 controllerNumber=1 scan=25869	120.145
27110:4	18	R.AFSN[+1856.656]SSYVLNPTTGELVFDPLSASDTGEYSC[+57.021]EAR.N	HexNAc(3)Hex(5)Fuc(1)NeuAc(1)	C[+57], N[+1857]	1386.09	4	5541.33	5541.32	0	2.5	182	Specific	853.8	824.32	824.32	16.64	28	>sp|Q9Y624|JAM1_HUMAN Junctional adhesion molecule A OS=Homo sapiens GN=F11R PE=1 SV=1	8421	Caco2P7_diffgpep1.25836.25836.4	controllerType=0 controllerNumber=1 scan=25836	120.004
27001:4	18	R.AFSN[+2059.735]SSYVLNPTTGELVFDPLSASDTGEYSC[+57.021]EAR.N	HexNAc(4)Hex(5)Fuc(1)NeuAc(1)	C[+57], N[+2060]	1436.86	4	5744.42	5744.4	0	2.9	182	Specific	896.53	862.11	24.18	16.64	28	>sp|Q9Y624|JAM1_HUMAN Junctional adhesion molecule A OS=Homo sapiens GN=F11R PE=1 SV=1	8421	Caco2P7_diffgpep1.25730.25730.4	controllerType=0 controllerNumber=1 scan=25730	119.538
18423:4	19	K.FLKPYTLEEQKN[+2628.967]LTVC[+57.021]PDGALFEQK.G	HexNAc(6)Hex(6)Fuc(3)NeuAc(0)	C[+57], N[+2629]	1400.38	4	5598.49	5597.48	1	2.1	113	Specific	116.71	116.71	116.71	2.55	46	>sp|P54709|AT1B3_HUMAN Sodium/potassium-transporting ATPase subunit beta-3 OS=Homo sapiens GN=ATP1B3 PE=1 SV=1	1290	Caco2P7_diffgpep1.17194.17194.4	controllerType=0 controllerNumber=1 scan=17194	81.8607
21842:4	19	K.FLKPYTLEEQKN[+2919.042]LTVC[+57.021]PDGALFEQK.G	HexNAc(6)Hex(6)Fuc(1)NeuAc(2)	C[+57], N[+2919]	1472.39	4	5886.53	5887.55	-1	-4.3	113	Specific	155.29	155.29	155.29	2.1	46	>sp|P54709|AT1B3_HUMAN Sodium/potassium-transporting ATPase subunit beta-3 OS=Homo sapiens GN=ATP1B3 PE=1 SV=1	1290	Caco2P7_diffgpep1.20029.20029.4	controllerType=0 controllerNumber=1 scan=20029	95.1298
21428:5	19	K.FLKPYTLEEQKN[+3284.174]LTVC[+57.021]PDGALFEQK.G	HexNAc(7)Hex(7)Fuc(1)NeuAc(2)	C[+57], N[+3284]	1251.15	5	6251.74	6252.69	-1	9.6	113	Specific	168.05	168.05	168.05	2.03	46	>sp|P54709|AT1B3_HUMAN Sodium/potassium-transporting ATPase subunit beta-3 OS=Homo sapiens GN=ATP1B3 PE=1 SV=1	1290	Caco2P7_diffgpep1.19681.19681.5	controllerType=0 controllerNumber=1 scan=19681	93.5301
21694:5	19	K.FLKPYTLEEQKN[+3064.079]LTVC[+57.021]PDGALFEQK.G	HexNAc(6)Hex(6)Fuc(0)NeuAc(3)	C[+57], N[+3064]	1207.12	5	6031.56	6032.59	-1	-5.1	113	Specific	182.89	123.41	123.41	2	46	>sp|P54709|AT1B3_HUMAN Sodium/potassium-transporting ATPase subunit beta-3 OS=Homo sapiens GN=ATP1B3 PE=1 SV=1	1290	Caco2P7_diffgpep1.19908.19908.5	controllerType=0 controllerNumber=1 scan=19908	94.577
21633:5	19	K.FLKPYTLEEQKN[+2715.963]LTVC[+57.021]PDGALFEQK.G	HexNAc(5)Hex(6)Fuc(1)NeuAc(2)	C[+57], N[+2716]	1137.5	5	5683.49	5684.48	-1	2.6	113	Specific	199.67	128.47	128.47	2.4	46	>sp|P54709|AT1B3_HUMAN Sodium/potassium-transporting ATPase subunit beta-3 OS=Homo sapiens GN=ATP1B3 PE=1 SV=1	1290	Caco2P7_diffgpep1.19849.19849.5	controllerType=0 controllerNumber=1 scan=19849	94.3119
18412:4	19	K.FLKPYTLEEQKN[+2627.947]LTVC[+57.021]PDGALFEQK.G	HexNAc(6)Hex(6)Fuc(1)NeuAc(1)	C[+57], N[+2628]	1399.88	4	5596.48	5596.46	0	4.5	113	Specific	205.11	157.99	18.36	2.57	46	>sp|P54709|AT1B3_HUMAN Sodium/potassium-transporting ATPase subunit beta-3 OS=Homo sapiens GN=ATP1B3 PE=1 SV=1	1290	Caco2P7_diffgpep1.17182.17182.4	controllerType=0 controllerNumber=1 scan=17182	81.7997
18340:4	19	K.FLKPYTLEEQKN[+2482.909]LTVC[+57.021]PDGALFEQK.G	HexNAc(6)Hex(6)Fuc(2)NeuAc(0)	C[+57], N[+2483]	1363.87	4	5452.47	5451.42	1	9.2	113	Specific	243.54	66.68	66.68	3.69	46	>sp|P54709|AT1B3_HUMAN Sodium/potassium-transporting ATPase subunit beta-3 OS=Homo sapiens GN=ATP1B3 PE=1 SV=1	1290	Caco2P7_diffgpep1.17122.17122.3	controllerType=0 controllerNumber=1 scan=17122	81.5095
19957:4	19	K.FLKPYTLEEQKN[+2424.867]LTVC[+57.021]PDGALFEQK.G	HexNAc(5)Hex(6)Fuc(1)NeuAc(1)	C[+57], N[+2425]	1348.86	4	5392.42	5393.38	-1	7.7	113	Specific	247.21	171.49	171.49	4.96	46	>sp|P54709|AT1B3_HUMAN Sodium/potassium-transporting ATPase subunit beta-3 OS=Homo sapiens GN=ATP1B3 PE=1 SV=1	1290	Caco2P7_diffgpep1.18439.18439.4	controllerType=0 controllerNumber=1 scan=18439	87.7227
21582:5	19	K.FLKPYTLEEQKN[+2715.963]LTVC[+57.021]PDGALFEQK.G	HexNAc(5)Hex(6)Fuc(1)NeuAc(2)	C[+57], N[+2716]	1137.51	5	5683.51	5684.48	-1	6.3	113	Specific	249.9	176.81	176.81	4.84	46	>sp|P54709|AT1B3_HUMAN Sodium/potassium-transporting ATPase subunit beta-3 OS=Homo sapiens GN=ATP1B3 PE=1 SV=1	1290	Caco2P7_diffgpep1.19804.19804.5	controllerType=0 controllerNumber=1 scan=19804	94.1103
18504:4	19	K.FLKPYTLEEQKN[+2336.851]LTVC[+57.021]PDGALFEQK.G	HexNAc(6)Hex(6)Fuc(1)NeuAc(0)	C[+57], N[+2337]	1327.1	4	5305.39	5305.36	0	5.5	113	Specific	266.07	242.33	242.33	5.66	46	>sp|P54709|AT1B3_HUMAN Sodium/potassium-transporting ATPase subunit beta-3 OS=Homo sapiens GN=ATP1B3 PE=1 SV=1	1290	Caco2P7_diffgpep1.17256.17256.4	controllerType=0 controllerNumber=1 scan=17256	82.166
19749:5	19	K.FLKPYTLEEQKN[+2992.083]LTVC[+57.021]PDGALFEQK.G	HexNAc(5)Hex(5)Fuc(4)NeuAc(2)	C[+57], N[+2992]	1192.92	5	5960.58	5960.6	0	-3.3	113	Specific	269.77	158.32	17.55	4.89	46	>sp|P54709|AT1B3_HUMAN Sodium/potassium-transporting ATPase subunit beta-3 OS=Homo sapiens GN=ATP1B3 PE=1 SV=1	1290	Caco2P7_diffgpep1.18268.18268.5	controllerType=0 controllerNumber=1 scan=18268	86.919
19936:4	19	K.FLKPYTLEEQKN[+2424.867]LTVC[+57.021]PDGALFEQK.G	HexNAc(5)Hex(6)Fuc(1)NeuAc(1)	C[+57], N[+2425]	1349.11	4	5393.4	5393.38	0	4.3	113	Specific	270.78	161.21	26.67	5.8	46	>sp|P54709|AT1B3_HUMAN Sodium/potassium-transporting ATPase subunit beta-3 OS=Homo sapiens GN=ATP1B3 PE=1 SV=1	1290	Caco2P7_diffgpep1.18423.18423.4	controllerType=0 controllerNumber=1 scan=18423	87.6437
18379:4	19	K.FLKPYTLEEQKN[+2627.947]LTVC[+57.021]PDGALFEQK.G	HexNAc(6)Hex(6)Fuc(1)NeuAc(1)	C[+57], N[+2628]	1400.12	4	5597.46	5596.46	1	0.1	113	Specific	271.86	137.96	31.12	5.28	46	>sp|P54709|AT1B3_HUMAN Sodium/potassium-transporting ATPase subunit beta-3 OS=Homo sapiens GN=ATP1B3 PE=1 SV=1	1290	Caco2P7_diffgpep1.17154.17154.4	controllerType=0 controllerNumber=1 scan=17154	81.6638
19895:4	19	K.FLKPYTLEEQKN[+2424.867]LTVC[+57.021]PDGALFEQK.G	HexNAc(5)Hex(6)Fuc(1)NeuAc(1)	C[+57], N[+2425]	1349.11	4	5393.41	5393.38	0	5.9	113	Specific	303.66	137.55	39.79	5.17	46	>sp|P54709|AT1B3_HUMAN Sodium/potassium-transporting ATPase subunit beta-3 OS=Homo sapiens GN=ATP1B3 PE=1 SV=1	1290	Caco2P7_diffgpep1.18388.18388.4	controllerType=0 controllerNumber=1 scan=18388	87.4809
21747:4	19	K.FLKPYTLEEQKN[+2350.830]LTVC[+57.021]PDGALFEQK.G	HexNAc(4)Hex(5)Fuc(1)NeuAc(2)	C[+57], N[+2351]	1330.34	4	5318.33	5319.34	-1	-1.6	113	Specific	305.13	138	89.21	5.07	46	>sp|P54709|AT1B3_HUMAN Sodium/potassium-transporting ATPase subunit beta-3 OS=Homo sapiens GN=ATP1B3 PE=1 SV=1	1290	Caco2P7_diffgpep1.19952.19952.4	controllerType=0 controllerNumber=1 scan=19952	94.7748
21646:4	19	K.FLKPYTLEEQKN[+2716.983]LTVC[+57.021]PDGALFEQK.G	HexNAc(5)Hex(6)Fuc(3)NeuAc(1)	C[+57], N[+2717]	1422.13	4	5685.5	5685.5	0	1	113	Specific	315.64	279.76	10.4	6.28	46	>sp|P54709|AT1B3_HUMAN Sodium/potassium-transporting ATPase subunit beta-3 OS=Homo sapiens GN=ATP1B3 PE=1 SV=1	1290	Caco2P7_diffgpep1.19861.19861.4	controllerType=0 controllerNumber=1 scan=19861	94.3683
21797:5	19	K.FLKPYTLEEQKN[+2919.042]LTVC[+57.021]PDGALFEQK.G	HexNAc(6)Hex(6)Fuc(1)NeuAc(2)	C[+57], N[+2919]	1178.12	5	5886.56	5887.55	-1	2.3	113	Specific	318.39	245.77	245.77	5.96	46	>sp|P54709|AT1B3_HUMAN Sodium/potassium-transporting ATPase subunit beta-3 OS=Homo sapiens GN=ATP1B3 PE=1 SV=1	1290	Caco2P7_diffgpep1.19991.19991.5	controllerType=0 controllerNumber=1 scan=19991	94.9594
21570:4	19	K.FLKPYTLEEQKN[+2716.983]LTVC[+57.021]PDGALFEQK.G	HexNAc(5)Hex(6)Fuc(3)NeuAc(1)	C[+57], N[+2717]	1422.14	4	5685.52	5685.5	0	4.6	113	Specific	326.41	278.05	10.4	6.05	46	>sp|P54709|AT1B3_HUMAN Sodium/potassium-transporting ATPase subunit beta-3 OS=Homo sapiens GN=ATP1B3 PE=1 SV=1	1290	Caco2P7_diffgpep1.19794.19794.4	controllerType=0 controllerNumber=1 scan=19794	94.0637
18528:4	19	K.FLKPYTLEEQKN[+2174.798]LTVC[+57.021]PDGALFEQK.G	HexNAc(6)Hex(5)Fuc(1)NeuAc(0)	C[+57], N[+2175]	1286.34	4	5142.33	5143.31	-1	3.5	113	Specific	329.09	231.65	231.65	6.27	46	>sp|P54709|AT1B3_HUMAN Sodium/potassium-transporting ATPase subunit beta-3 OS=Homo sapiens GN=ATP1B3 PE=1 SV=1	1290	Caco2P7_diffgpep1.17273.17273.4	controllerType=0 controllerNumber=1 scan=17273	82.2505
21652:4	19	K.FLKPYTLEEQKN[+2716.983]LTVC[+57.021]PDGALFEQK.G	HexNAc(5)Hex(6)Fuc(3)NeuAc(1)	C[+57], N[+2717]	1421.88	4	5684.51	5685.5	-1	3.1	113	Specific	329.74	225.22	14.29	6.3	46	>sp|P54709|AT1B3_HUMAN Sodium/potassium-transporting ATPase subunit beta-3 OS=Homo sapiens GN=ATP1B3 PE=1 SV=1	1290	Caco2P7_diffgpep1.19868.19868.4	controllerType=0 controllerNumber=1 scan=19868	94.3984
20070:5	19	K.FLKPYTLEEQKN[+2627.947]LTVC[+57.021]PDGALFEQK.G	HexNAc(6)Hex(6)Fuc(1)NeuAc(1)	C[+57], N[+2628]	1120.11	5	5596.5	5596.46	0	7.5	113	Specific	348.09	276.34	17.36	5.53	46	>sp|P54709|AT1B3_HUMAN Sodium/potassium-transporting ATPase subunit beta-3 OS=Homo sapiens GN=ATP1B3 PE=1 SV=1	1290	Caco2P7_diffgpep1.18526.18526.5	controllerType=0 controllerNumber=1 scan=18526	88.1404
23454:5	19	K.FLKPYTLEEQKN[+3210.137]LTVC[+57.021]PDGALFEQK.G	HexNAc(6)Hex(6)Fuc(1)NeuAc(3)	C[+57], N[+3210]	1236.34	5	6177.67	6178.65	-1	3.1	113	Specific	361.49	189.48	189.48	6.06	46	>sp|P54709|AT1B3_HUMAN Sodium/potassium-transporting ATPase subunit beta-3 OS=Homo sapiens GN=ATP1B3 PE=1 SV=1	1290	Caco2P7_diffgpep1.21401.21401.5	controllerType=0 controllerNumber=1 scan=21401	101.388
19900:5	19	K.FLKPYTLEEQKN[+2627.947]LTVC[+57.021]PDGALFEQK.G	HexNAc(6)Hex(6)Fuc(1)NeuAc(1)	C[+57], N[+2628]	1120.1	5	5596.46	5596.46	0	0.3	113	Specific	383.38	278.35	34.39	6.25	46	>sp|P54709|AT1B3_HUMAN Sodium/potassium-transporting ATPase subunit beta-3 OS=Homo sapiens GN=ATP1B3 PE=1 SV=1	1290	Caco2P7_diffgpep1.18392.18392.5	controllerType=0 controllerNumber=1 scan=18392	87.4988
20055:4	19	K.FLKPYTLEEQKN[+2465.894]LTVC[+57.021]PDGALFEQK.G	HexNAc(6)Hex(5)Fuc(1)NeuAc(1)	C[+57], N[+2466]	1359.11	4	5433.41	5434.41	-1	0.8	113	Specific	388.28	293.79	293.79	6.6	46	>sp|P54709|AT1B3_HUMAN Sodium/potassium-transporting ATPase subunit beta-3 OS=Homo sapiens GN=ATP1B3 PE=1 SV=1	1290	Caco2P7_diffgpep1.18511.18511.4	controllerType=0 controllerNumber=1 scan=18511	88.0748
20226:4	19	K.FLKPYTLEEQKN[+2262.814]LTVC[+57.021]PDGALFEQK.G	HexNAc(5)Hex(5)Fuc(1)NeuAc(1)	C[+57], N[+2263]	1308.34	4	5230.35	5231.33	-1	4.9	113	Specific	390.23	291.85	291.85	6.26	46	>sp|P54709|AT1B3_HUMAN Sodium/potassium-transporting ATPase subunit beta-3 OS=Homo sapiens GN=ATP1B3 PE=1 SV=1	1290	Caco2P7_diffgpep1.18651.18651.4	controllerType=0 controllerNumber=1 scan=18651	88.7488
18402:5	19	K.FLKPYTLEEQKN[+2336.851]LTVC[+57.021]PDGALFEQK.G	HexNAc(6)Hex(6)Fuc(1)NeuAc(0)	C[+57], N[+2337]	1061.88	5	5305.35	5305.36	0	-3	113	Specific	402.33	277.83	277.83	5.75	46	>sp|P54709|AT1B3_HUMAN Sodium/potassium-transporting ATPase subunit beta-3 OS=Homo sapiens GN=ATP1B3 PE=1 SV=1	1290	Caco2P7_diffgpep1.17173.17173.5	controllerType=0 controllerNumber=1 scan=17173	81.7549
19861:4	19	K.FLKPYTLEEQKN[+2627.947]LTVC[+57.021]PDGALFEQK.G	HexNAc(6)Hex(6)Fuc(1)NeuAc(1)	C[+57], N[+2628]	1399.88	4	5596.51	5596.46	0	8.3	113	Specific	406.07	323.56	32.82	6.38	46	>sp|P54709|AT1B3_HUMAN Sodium/potassium-transporting ATPase subunit beta-3 OS=Homo sapiens GN=ATP1B3 PE=1 SV=1	1290	Caco2P7_diffgpep1.18364.18364.4	controllerType=0 controllerNumber=1 scan=18364	87.362
20057:5	19	K.FLKPYTLEEQKN[+2627.947]LTVC[+57.021]PDGALFEQK.G	HexNAc(6)Hex(6)Fuc(1)NeuAc(1)	C[+57], N[+2628]	1120.1	5	5596.47	5596.46	0	2	113	Specific	407.04	319	23.39	6.7	46	>sp|P54709|AT1B3_HUMAN Sodium/potassium-transporting ATPase subunit beta-3 OS=Homo sapiens GN=ATP1B3 PE=1 SV=1	1290	Caco2P7_diffgpep1.18514.18514.5	controllerType=0 controllerNumber=1 scan=18514	88.0869
20213:4	19	K.FLKPYTLEEQKN[+2262.814]LTVC[+57.021]PDGALFEQK.G	HexNAc(5)Hex(5)Fuc(1)NeuAc(1)	C[+57], N[+2263]	1308.59	4	5231.35	5231.33	0	5.2	113	Specific	426.94	217.69	23.1	6.2	46	>sp|P54709|AT1B3_HUMAN Sodium/potassium-transporting ATPase subunit beta-3 OS=Homo sapiens GN=ATP1B3 PE=1 SV=1	1290	Caco2P7_diffgpep1.18641.18641.4	controllerType=0 controllerNumber=1 scan=18641	88.6985
21551:4	19	K.FLKPYTLEEQKN[+2919.042]LTVC[+57.021]PDGALFEQK.G	HexNAc(6)Hex(6)Fuc(1)NeuAc(2)	C[+57], N[+2919]	1472.39	4	5886.54	5887.55	-1	-1.6	113	Specific	429.41	338.48	338.48	6.44	46	>sp|P54709|AT1B3_HUMAN Sodium/potassium-transporting ATPase subunit beta-3 OS=Homo sapiens GN=ATP1B3 PE=1 SV=1	1290	Caco2P7_diffgpep1.19780.19780.4	controllerType=0 controllerNumber=1 scan=19780	93.9954
23458:5	19	K.FLKPYTLEEQKN[+3210.137]LTVC[+57.021]PDGALFEQK.G	HexNAc(6)Hex(6)Fuc(1)NeuAc(3)	C[+57], N[+3210]	1236.33	5	6177.63	6178.65	-1	-2.5	113	Specific	429.59	247.56	247.56	5.77	46	>sp|P54709|AT1B3_HUMAN Sodium/potassium-transporting ATPase subunit beta-3 OS=Homo sapiens GN=ATP1B3 PE=1 SV=1	1290	Caco2P7_diffgpep1.21405.21405.5	controllerType=0 controllerNumber=1 scan=21405	101.405
21832:4	19	K.FLKPYTLEEQKN[+2553.910]LTVC[+57.021]PDGALFEQK.G	HexNAc(5)Hex(5)Fuc(1)NeuAc(2)	C[+57], N[+2554]	1381.11	4	5521.43	5522.42	-1	2.4	113	Specific	436.94	189.47	189.47	6.51	46	>sp|P54709|AT1B3_HUMAN Sodium/potassium-transporting ATPase subunit beta-3 OS=Homo sapiens GN=ATP1B3 PE=1 SV=1	1290	Caco2P7_diffgpep1.20021.20021.4	controllerType=0 controllerNumber=1 scan=20021	95.0904
23459:5	19	K.FLKPYTLEEQKN[+3211.158]LTVC[+57.021]PDGALFEQK.G	HexNAc(6)Hex(6)Fuc(3)NeuAc(2)	C[+57], N[+3211]	1236.74	5	6179.67	6179.67	0	0.2	113	Specific	438.48	241.04	10.4	6.41	46	>sp|P54709|AT1B3_HUMAN Sodium/potassium-transporting ATPase subunit beta-3 OS=Homo sapiens GN=ATP1B3 PE=1 SV=1	1290	Caco2P7_diffgpep1.21405.21405.5	controllerType=0 controllerNumber=1 scan=21405	101.405
21833:4	19	K.FLKPYTLEEQKN[+2554.930]LTVC[+57.021]PDGALFEQK.G	HexNAc(5)Hex(5)Fuc(3)NeuAc(1)	C[+57], N[+2555]	1381.87	4	5524.45	5523.44	1	0.3	113	Specific	441.34	195.14	98.87	6.63	46	>sp|P54709|AT1B3_HUMAN Sodium/potassium-transporting ATPase subunit beta-3 OS=Homo sapiens GN=ATP1B3 PE=1 SV=1	1290	Caco2P7_diffgpep1.20021.20021.4	controllerType=0 controllerNumber=1 scan=20021	95.0904
20201:4	19	K.FLKPYTLEEQKN[+2262.814]LTVC[+57.021]PDGALFEQK.G	HexNAc(5)Hex(5)Fuc(1)NeuAc(1)	C[+57], N[+2263]	1308.59	4	5231.35	5231.33	0	4.1	113	Specific	441.68	303.45	41.21	6.9	46	>sp|P54709|AT1B3_HUMAN Sodium/potassium-transporting ATPase subunit beta-3 OS=Homo sapiens GN=ATP1B3 PE=1 SV=1	1290	Caco2P7_diffgpep1.18632.18632.4	controllerType=0 controllerNumber=1 scan=18632	88.6532
18447:4	19	K.FLKPYTLEEQKN[+2174.798]LTVC[+57.021]PDGALFEQK.G	HexNAc(6)Hex(5)Fuc(1)NeuAc(0)	C[+57], N[+2175]	1286.59	4	5143.32	5143.31	0	2.3	113	Specific	445.28	381.9	381.9	8.8	46	>sp|P54709|AT1B3_HUMAN Sodium/potassium-transporting ATPase subunit beta-3 OS=Homo sapiens GN=ATP1B3 PE=1 SV=1	1290	Caco2P7_diffgpep1.17212.17212.4	controllerType=0 controllerNumber=1 scan=17212	81.9506
21564:5	19	K.FLKPYTLEEQKN[+2919.042]LTVC[+57.021]PDGALFEQK.G	HexNAc(6)Hex(6)Fuc(1)NeuAc(2)	C[+57], N[+2919]	1178.12	5	5886.57	5887.55	-1	2.4	113	Specific	456.98	208.45	208.45	6.37	46	>sp|P54709|AT1B3_HUMAN Sodium/potassium-transporting ATPase subunit beta-3 OS=Homo sapiens GN=ATP1B3 PE=1 SV=1	1290	Caco2P7_diffgpep1.19788.19788.5	controllerType=0 controllerNumber=1 scan=19788	94.0349
20174:4	19	K.FLKPYTLEEQKN[+2100.761]LTVC[+57.021]PDGALFEQK.G	HexNAc(5)Hex(4)Fuc(1)NeuAc(1)	C[+57], N[+2101]	1268.08	4	5069.3	5069.27	0	5.1	113	Specific	489.67	267.77	18.36	6.53	46	>sp|P54709|AT1B3_HUMAN Sodium/potassium-transporting ATPase subunit beta-3 OS=Homo sapiens GN=ATP1B3 PE=1 SV=1	1290	Caco2P7_diffgpep1.18612.18612.4	controllerType=0 controllerNumber=1 scan=18612	88.5565
19927:4	19	K.FLKPYTLEEQKN[+2774.004]LTVC[+57.021]PDGALFEQK.G	HexNAc(6)Hex(6)Fuc(2)NeuAc(1)	C[+57], N[+2774]	1436.39	4	5742.53	5742.52	0	2.1	113	Specific	509.11	396.99	28.07	9.1	46	>sp|P54709|AT1B3_HUMAN Sodium/potassium-transporting ATPase subunit beta-3 OS=Homo sapiens GN=ATP1B3 PE=1 SV=1	1290	Caco2P7_diffgpep1.18414.18414.4	controllerType=0 controllerNumber=1 scan=18414	87.6024
20007:4	19	K.FLKPYTLEEQKN[+2262.814]LTVC[+57.021]PDGALFEQK.G	HexNAc(5)Hex(5)Fuc(1)NeuAc(1)	C[+57], N[+2263]	1308.59	4	5231.34	5231.33	0	3.1	113	Specific	524.51	350.11	47.06	7.49	46	>sp|P54709|AT1B3_HUMAN Sodium/potassium-transporting ATPase subunit beta-3 OS=Homo sapiens GN=ATP1B3 PE=1 SV=1	1290	Caco2P7_diffgpep1.18475.18475.4	controllerType=0 controllerNumber=1 scan=18475	87.8988
18554:4	19	K.FLKPYTLEEQKN[+1971.719]LTVC[+57.021]PDGALFEQK.G	HexNAc(5)Hex(5)Fuc(1)NeuAc(0)	C[+57], N[+1972]	1235.82	4	4940.26	4940.23	0	5.7	113	Specific	527.11	384.87	384.87	8.62	46	>sp|P54709|AT1B3_HUMAN Sodium/potassium-transporting ATPase subunit beta-3 OS=Homo sapiens GN=ATP1B3 PE=1 SV=1	1290	Caco2P7_diffgpep1.17293.17293.4	controllerType=0 controllerNumber=1 scan=17293	82.3436
20015:4	19	K.FLKPYTLEEQKN[+2262.814]LTVC[+57.021]PDGALFEQK.G	HexNAc(5)Hex(5)Fuc(1)NeuAc(1)	C[+57], N[+2263]	1308.59	4	5231.35	5231.33	0	4.7	113	Specific	582.57	349.2	37.67	8.74	46	>sp|P54709|AT1B3_HUMAN Sodium/potassium-transporting ATPase subunit beta-3 OS=Homo sapiens GN=ATP1B3 PE=1 SV=1	1290	Caco2P7_diffgpep1.18481.18481.4	controllerType=0 controllerNumber=1 scan=18481	87.9274
18617:4	19	K.FLKPYTLEEQKN[+1809.666]LTVC[+57.021]PDGALFEQK.G	HexNAc(5)Hex(4)Fuc(1)NeuAc(0)	C[+57], N[+1810]	1195.3	4	4778.19	4778.18	0	1.7	113	Specific	591.7	354.38	354.38	9.2	46	>sp|P54709|AT1B3_HUMAN Sodium/potassium-transporting ATPase subunit beta-3 OS=Homo sapiens GN=ATP1B3 PE=1 SV=1	1290	Caco2P7_diffgpep1.17345.17345.4	controllerType=0 controllerNumber=1 scan=17345	82.5908
18553:4	19	K.FLKPYTLEEQKN[+1809.666]LTVC[+57.021]PDGALFEQK.G	HexNAc(5)Hex(4)Fuc(1)NeuAc(0)	C[+57], N[+1810]	1195.3	4	4778.19	4778.18	0	3.4	113	Specific	664.38	314.71	314.71	10.75	46	>sp|P54709|AT1B3_HUMAN Sodium/potassium-transporting ATPase subunit beta-3 OS=Homo sapiens GN=ATP1B3 PE=1 SV=1	1290	Caco2P7_diffgpep1.17292.17292.4	controllerType=0 controllerNumber=1 scan=17292	82.3379
18500:4	19	K.FLKPYTLEEQKN[+1971.719]LTVC[+57.021]PDGALFEQK.G	HexNAc(5)Hex(5)Fuc(1)NeuAc(0)	C[+57], N[+1972]	1235.82	4	4940.26	4940.23	0	4.8	113	Specific	669.39	403.37	403.37	12.32	46	>sp|P54709|AT1B3_HUMAN Sodium/potassium-transporting ATPase subunit beta-3 OS=Homo sapiens GN=ATP1B3 PE=1 SV=1	1290	Caco2P7_diffgpep1.17253.17253.4	controllerType=0 controllerNumber=1 scan=17253	82.1498
20210:4	19	K.FLKPYTLEEQKN[+2100.761]LTVC[+57.021]PDGALFEQK.G	HexNAc(5)Hex(4)Fuc(1)NeuAc(1)	C[+57], N[+2101]	1268.08	4	5069.3	5069.27	0	6.1	113	Specific	670.11	436.07	34.44	12.2	46	>sp|P54709|AT1B3_HUMAN Sodium/potassium-transporting ATPase subunit beta-3 OS=Homo sapiens GN=ATP1B3 PE=1 SV=1	1290	Caco2P7_diffgpep1.18639.18639.4	controllerType=0 controllerNumber=1 scan=18639	88.6873
18392:4	19	K.FLKPYTLEEQKN[+2336.851]LTVC[+57.021]PDGALFEQK.G	HexNAc(6)Hex(6)Fuc(1)NeuAc(0)	C[+57], N[+2337]	1327.1	4	5305.37	5305.36	0	0.6	113	Specific	680.77	431.06	431.06	12.66	46	>sp|P54709|AT1B3_HUMAN Sodium/potassium-transporting ATPase subunit beta-3 OS=Homo sapiens GN=ATP1B3 PE=1 SV=1	1290	Caco2P7_diffgpep1.17164.17164.4	controllerType=0 controllerNumber=1 scan=17164	81.7098
18535:4	19	K.FLKPYTLEEQKN[+1702.581]LTVC[+57.021]PDGALFEQK.G	HexNAc(2)Hex(8)Fuc(0)NeuAc(0)	C[+57], N[+1703]	1168.53	4	4671.11	4671.09	0	2.6	113	Specific	690.18	586.81	586.81	12.65	46	>sp|P54709|AT1B3_HUMAN Sodium/potassium-transporting ATPase subunit beta-3 OS=Homo sapiens GN=ATP1B3 PE=1 SV=1	1290	Caco2P7_diffgpep1.17280.17280.4	controllerType=0 controllerNumber=1 scan=17280	82.2808
23440:4	19	K.KLHVGYLQPLVAVQVSFAPN[+2554.930]NTGK.E	HexNAc(5)Hex(5)Fuc(3)NeuAc(1)	N[+2555]	1284.84	4	5136.36	5135.36	1	-1.5	221	Specific	145.03	145.03	31.11	3.82	46	>sp|P54709|AT1B3_HUMAN Sodium/potassium-transporting ATPase subunit beta-3 OS=Homo sapiens GN=ATP1B3 PE=1 SV=1	1290	Caco2P7_diffgpep1.21386.21386.4	controllerType=0 controllerNumber=1 scan=21386	101.326
23906:4	19	K.LHVGYLQPLVAVQVSFAPN[+2774.004]NTGK.E	HexNAc(6)Hex(6)Fuc(2)NeuAc(1)	N[+2774]	1307.35	4	5226.36	5226.34	0	4.6	222	Specific	330.83	261.04	20.36	6.26	46	>sp|P54709|AT1B3_HUMAN Sodium/potassium-transporting ATPase subunit beta-3 OS=Homo sapiens GN=ATP1B3 PE=1 SV=1	1290	Caco2P7_diffgpep1.21814.21814.4	controllerType=0 controllerNumber=1 scan=21814	103.235
24080:4	19	K.LHVGYLQPLVAVQVSFAPN[+2408.872]NTGK.E	HexNAc(5)Hex(5)Fuc(2)NeuAc(1)	N[+2409]	1216.07	4	4861.25	4861.21	0	9.6	222	Specific	338.85	315.12	40.14	5.75	46	>sp|P54709|AT1B3_HUMAN Sodium/potassium-transporting ATPase subunit beta-3 OS=Homo sapiens GN=ATP1B3 PE=1 SV=1	1290	Caco2P7_diffgpep1.22030.22030.4	controllerType=0 controllerNumber=1 scan=22030	104.132
24040:4	19	K.LHVGYLQPLVAVQVSFAPN[+2408.872]NTGK.E	HexNAc(5)Hex(5)Fuc(2)NeuAc(1)	N[+2409]	1216.07	4	4861.24	4861.21	0	6.5	222	Specific	413.65	355.67	17.92	6.78	46	>sp|P54709|AT1B3_HUMAN Sodium/potassium-transporting ATPase subunit beta-3 OS=Homo sapiens GN=ATP1B3 PE=1 SV=1	1290	Caco2P7_diffgpep1.21993.21993.4	controllerType=0 controllerNumber=1 scan=21993	103.973
25964:4	19	K.LHVGYLQPLVAVQVSFAPN[+2553.910]NTGK.E	HexNAc(5)Hex(5)Fuc(1)NeuAc(2)	N[+2554]	1252.07	4	5005.27	5006.24	-1	5.1	222	Specific	442.47	385.98	385.98	8.67	46	>sp|P54709|AT1B3_HUMAN Sodium/potassium-transporting ATPase subunit beta-3 OS=Homo sapiens GN=ATP1B3 PE=1 SV=1	1290	Caco2P7_diffgpep1.24357.24357.4	controllerType=0 controllerNumber=1 scan=24357	113.918
24189:4	19	K.LHVGYLQPLVAVQVSFAPN[+2262.814]NTGK.E	HexNAc(5)Hex(5)Fuc(1)NeuAc(1)	N[+2263]	1179.55	4	4715.17	4715.15	0	3.6	222	Specific	446.89	355.76	20.4	7.4	46	>sp|P54709|AT1B3_HUMAN Sodium/potassium-transporting ATPase subunit beta-3 OS=Homo sapiens GN=ATP1B3 PE=1 SV=1	1290	Caco2P7_diffgpep1.22148.22148.4	controllerType=0 controllerNumber=1 scan=22148	104.664
25989:4	19	K.LHVGYLQPLVAVQVSFAPN[+2553.910]NTGK.E	HexNAc(5)Hex(5)Fuc(1)NeuAc(2)	N[+2554]	1252.07	4	5005.26	5006.24	-1	3.5	222	Specific	547.54	448.46	448.46	9.39	46	>sp|P54709|AT1B3_HUMAN Sodium/potassium-transporting ATPase subunit beta-3 OS=Homo sapiens GN=ATP1B3 PE=1 SV=1	1290	Caco2P7_diffgpep1.24385.24385.4	controllerType=0 controllerNumber=1 scan=24385	114.03
24163:4	19	K.LHVGYLQPLVAVQVSFAPN[+2262.814]NTGK.E	HexNAc(5)Hex(5)Fuc(1)NeuAc(1)	N[+2263]	1179.55	4	4715.16	4715.15	0	2.5	222	Specific	592.02	427.23	35.64	10.86	46	>sp|P54709|AT1B3_HUMAN Sodium/potassium-transporting ATPase subunit beta-3 OS=Homo sapiens GN=ATP1B3 PE=1 SV=1	1290	Caco2P7_diffgpep1.22106.22106.4	controllerType=0 controllerNumber=1 scan=22106	104.493
07356:2	20	R.ALSN[+1702.581]ISLR.L	HexNAc(2)Hex(8)Fuc(0)NeuAc(0)	N[+1703]	1288.56	2	2576.1	2576.1	0	2.5	124	Specific	274.85	166	166	5.55	40	>sp|O15031|PLXB2_HUMAN Plexin-B2 OS=Homo sapiens GN=PLXNB2 PE=1 SV=3	13258	Caco2P7_diffgpep1.7980.7980.2	controllerType=0 controllerNumber=1 scan=7980	37.1083
06423:3	20	K.SC[+57.021]VAVTSAQPQN[+1864.634]MSR.R	HexNAc(2)Hex(9)Fuc(0)NeuAc(0)	C[+57], N[+1865]	1167.47	3	3500.39	3500.39	0	0	517	Specific	355.68	230.09	230.09	5.69	40	>sp|O15031|PLXB2_HUMAN Plexin-B2 OS=Homo sapiens GN=PLXNB2 PE=1 SV=3	13258	Caco2P7_diffgpep1.7182.7182.3	controllerType=0 controllerNumber=1 scan=7182	33.2272
06885:3	20	K.SC[+57.021]VAVTSAQPQN[+1825.661]MSR.R	HexNAc(5)Hex(5)Fuc(0)NeuAc(0)	C[+57], N[+1826]	1154.48	3	3461.42	3461.42	0	0.7	517	Specific	356.21	155.38	155.38	5.62	40	>sp|O15031|PLXB2_HUMAN Plexin-B2 OS=Homo sapiens GN=PLXNB2 PE=1 SV=3	13258	Caco2P7_diffgpep1.7603.7603.3	controllerType=0 controllerNumber=1 scan=7603	35.2324
08286:3	20	K.SC[+57.021]VAVTSAQPQN[+2116.756]MSR.R	HexNAc(5)Hex(5)Fuc(0)NeuAc(1)	C[+57], N[+2117]	1251.51	3	3752.53	3752.51	0	4	517	Specific	412.68	271.93	271.93	6.26	40	>sp|O15031|PLXB2_HUMAN Plexin-B2 OS=Homo sapiens GN=PLXNB2 PE=1 SV=3	13258	Caco2P7_diffgpep1.8804.8804.3	controllerType=0 controllerNumber=1 scan=8804	41.0592
16486:4	20	K.LSHDAN[+2554.930]ETLPLHLYVK.S	HexNAc(5)Hex(5)Fuc(3)NeuAc(1)	N[+2555]	1101.73	4	4403.91	4404.91	-1	0.6	728	Specific	210.58	145.47	21.83	4.34	40	>sp|O15031|PLXB2_HUMAN Plexin-B2 OS=Homo sapiens GN=PLXNB2 PE=1 SV=3	13258	Caco2P7_diffgpep1.15698.15698.4	controllerType=0 controllerNumber=1 scan=15698	74.4453
12530:4	20	K.LSHDAN[+2117.777]ETLPLHLYVK.S	HexNAc(5)Hex(5)Fuc(2)NeuAc(0)	N[+2118]	992.696	4	3967.76	3967.76	0	1.5	728	Specific	214.45	147.43	147.43	3.27	40	>sp|O15031|PLXB2_HUMAN Plexin-B2 OS=Homo sapiens GN=PLXNB2 PE=1 SV=3	13258	Caco2P7_diffgpep1.12491.12491.4	controllerType=0 controllerNumber=1 scan=12491	58.7622
12506:4	20	K.LSHDAN[+1702.581]ETLPLHLYVK.S	HexNAc(2)Hex(8)Fuc(0)NeuAc(0)	N[+1703]	888.896	4	3552.56	3552.56	0	0.4	728	Specific	216.11	86.3	86.3	2.7	40	>sp|O15031|PLXB2_HUMAN Plexin-B2 OS=Homo sapiens GN=PLXNB2 PE=1 SV=3	13258	Caco2P7_diffgpep1.12472.12472.4	controllerType=0 controllerNumber=1 scan=12472	58.6707
14186:4	20	K.LSHDAN[+2408.872]ETLPLHLYVK.S	HexNAc(5)Hex(5)Fuc(2)NeuAc(1)	N[+2409]	1065.47	4	4258.86	4258.85	0	2.5	728	Specific	321.37	210.8	27.58	6.63	40	>sp|O15031|PLXB2_HUMAN Plexin-B2 OS=Homo sapiens GN=PLXNB2 PE=1 SV=3	13258	Caco2P7_diffgpep1.13822.13822.4	controllerType=0 controllerNumber=1 scan=13822	65.3081
13216:3	20	K.LHVTLYN[+1378.476]C[+57.021]SFGR.S	HexNAc(2)Hex(6)Fuc(0)NeuAc(0)	C[+57], N[+1378]	949.069	3	2845.19	2845.2	0	-1.1	753	Specific	380.38	250.75	250.75	5.77	40	>sp|O15031|PLXB2_HUMAN Plexin-B2 OS=Homo sapiens GN=PLXNB2 PE=1 SV=3	13258	Caco2P7_diffgpep1.13051.13051.3	controllerType=0 controllerNumber=1 scan=13051	61.4704
12975:3	20	K.LHVTLYN[+2026.687]C[+57.021]SFGR.S	HexNAc(2)Hex(10)Fuc(0)NeuAc(0)	C[+57], N[+2027]	1165.14	3	3493.42	3493.41	0	3.4	753	Specific	459.66	276.29	276.29	6.63	40	>sp|O15031|PLXB2_HUMAN Plexin-B2 OS=Homo sapiens GN=PLXNB2 PE=1 SV=3	13258	Caco2P7_diffgpep1.12858.12858.3	controllerType=0 controllerNumber=1 scan=12858	60.5246
12994:3	20	K.LHVTLYN[+1864.634]C[+57.021]SFGR.S	HexNAc(2)Hex(9)Fuc(0)NeuAc(0)	C[+57], N[+1865]	1111.13	3	3331.36	3331.36	0	3	753	Specific	668.95	604.48	604.48	12.54	40	>sp|O15031|PLXB2_HUMAN Plexin-B2 OS=Homo sapiens GN=PLXNB2 PE=1 SV=3	13258	Caco2P7_diffgpep1.12876.12876.3	controllerType=0 controllerNumber=1 scan=12876	60.6064
21491:4	20	R.C[+57.021]VYEALC[+57.021]N[+2554.930]TTSEC[+57.021]PPPVITR.I	HexNAc(5)Hex(5)Fuc(3)NeuAc(1)	C[+57]*3, N[+2555]	1231.51	4	4923.01	4922.01	1	-1	788	Specific	164.68	119.7	24.86	2.04	40	>sp|O15031|PLXB2_HUMAN Plexin-B2 OS=Homo sapiens GN=PLXNB2 PE=1 SV=3	13258	Caco2P7_diffgpep1.19734.19734.4	controllerType=0 controllerNumber=1 scan=19734	93.7695
19280:4	20	R.C[+57.021]VYEALC[+57.021]N[+2262.814]TTSEC[+57.021]PPPVITR.I	HexNAc(5)Hex(5)Fuc(1)NeuAc(1)	C[+57]*3, N[+2263]	1158.48	4	4630.9	4629.89	1	1.6	788	Specific	258.67	109.87	28.23	5.04	40	>sp|O15031|PLXB2_HUMAN Plexin-B2 OS=Homo sapiens GN=PLXNB2 PE=1 SV=3	13258	Caco2P7_diffgpep1.17860.17860.4	controllerType=0 controllerNumber=1 scan=17860	85.0869
19268:4	20	R.C[+57.021]VYEALC[+57.021]N[+2262.814]TTSEC[+57.021]PPPVITR.I	HexNAc(5)Hex(5)Fuc(1)NeuAc(1)	C[+57]*3, N[+2263]	1157.98	4	4628.91	4629.89	-1	3.9	788	Specific	259.52	195.93	195.93	5.57	40	>sp|O15031|PLXB2_HUMAN Plexin-B2 OS=Homo sapiens GN=PLXNB2 PE=1 SV=3	13258	Caco2P7_diffgpep1.17847.17847.4	controllerType=0 controllerNumber=1 scan=17847	85.0254
24594:4	20	R.C[+57.021]VYEALC[+57.021]N[+2246.819]TTSEC[+57.021]PPPVITR.I	HexNAc(5)Hex(4)Fuc(2)NeuAc(1)	C[+57]*3, N[+2247]	1154.22	4	4613.87	4613.9	0	-6.2	788	Specific	274.21	153.92	153.92	4.59	40	>sp|O15031|PLXB2_HUMAN Plexin-B2 OS=Homo sapiens GN=PLXNB2 PE=1 SV=3	13258	Caco2P7_diffgpep1.22566.22566.4	controllerType=0 controllerNumber=1 scan=22566	106.474
24581:4	20	R.C[+57.021]VYEALC[+57.021]N[+2246.819]TTSEC[+57.021]PPPVITR.I	HexNAc(5)Hex(4)Fuc(2)NeuAc(1)	C[+57]*3, N[+2247]	1153.97	4	4612.86	4613.9	-1	-6.6	788	Specific	282.46	203.12	203.12	4.82	40	>sp|O15031|PLXB2_HUMAN Plexin-B2 OS=Homo sapiens GN=PLXNB2 PE=1 SV=3	13258	Caco2P7_diffgpep1.22554.22554.4	controllerType=0 controllerNumber=1 scan=22554	106.417
17074:3	20	R.SIN[+1540.529]VTGQGFSLIQR.F	HexNAc(2)Hex(7)Fuc(0)NeuAc(0)	N[+1541]	1020.79	3	3060.35	3060.35	0	1.1	1000	Specific	423.39	286.43	286.43	6.47	40	>sp|O15031|PLXB2_HUMAN Plexin-B2 OS=Homo sapiens GN=PLXNB2 PE=1 SV=3	13258	Caco2P7_diffgpep1.16150.16150.3	controllerType=0 controllerNumber=1 scan=16150	76.6919
16950:3	20	R.SIN[+1702.581]VTGQGFSLIQR.F	HexNAc(2)Hex(8)Fuc(0)NeuAc(0)	N[+1703]	1074.81	3	3222.41	3222.4	0	2.9	1000	Specific	783.42	521.91	521.91	14.3	40	>sp|O15031|PLXB2_HUMAN Plexin-B2 OS=Homo sapiens GN=PLXNB2 PE=1 SV=3	13258	Caco2P7_diffgpep1.16054.16054.3	controllerType=0 controllerNumber=1 scan=16054	76.2127
16961:3	20	R.SIN[+1864.634]VTGQGFSLIQR.F	HexNAc(2)Hex(9)Fuc(0)NeuAc(0)	N[+1865]	1128.83	3	3384.46	3384.46	0	2.2	1000	Specific	873.5	632.96	632.96	16.3	40	>sp|O15031|PLXB2_HUMAN Plexin-B2 OS=Homo sapiens GN=PLXNB2 PE=1 SV=3	13258	Caco2P7_diffgpep1.16062.16062.3	controllerType=0 controllerNumber=1 scan=16062	76.2518
19546:4	20	R.EAESLQPMTVVGTDYVFHN[+2262.814]DTK.V	HexNAc(5)Hex(5)Fuc(1)NeuAc(1)	N[+2263]	1186.5	4	4742.99	4743.97	-1	4	1031	Specific	204.12	103.43	103.43	2.03	40	>sp|O15031|PLXB2_HUMAN Plexin-B2 OS=Homo sapiens GN=PLXNB2 PE=1 SV=3	13258	Caco2P7_diffgpep1.18090.18090.4	controllerType=0 controllerNumber=1 scan=18090	86.1217
17812:3	20	R.EAESLQPMTVVGTDYVFHN[+1864.634]DTK.V	HexNAc(2)Hex(9)Fuc(0)NeuAc(0)	N[+1865]	1449.27	3	4345.81	4345.79	0	2.7	1031	Specific	238.42	176.65	176.65	5.69	40	>sp|O15031|PLXB2_HUMAN Plexin-B2 OS=Homo sapiens GN=PLXNB2 PE=1 SV=3	13258	Caco2P7_diffgpep1.16718.16718.3	controllerType=0 controllerNumber=1 scan=16718	79.542
13132:4	20	R.EAESLQPMTVVGTDYVFHN[+2319.836]DTK.V	HexNAc(6)Hex(5)Fuc(0)NeuAc(1)	N[+2320]	1201.01	4	4801.01	4801	0	3.2	1031	Specific	241.87	72.95	30.64	2.64	40	>sp|O15031|PLXB2_HUMAN Plexin-B2 OS=Homo sapiens GN=PLXNB2 PE=1 SV=3	13258	Caco2P7_diffgpep1.12985.12985.4	controllerType=0 controllerNumber=1 scan=12985	61.1473
19562:4	20	R.EAESLQPMTVVGTDYVFHN[+2262.814]DTK.V	HexNAc(5)Hex(5)Fuc(1)NeuAc(1)	N[+2263]	1186.75	4	4743.99	4743.97	0	2.7	1031	Specific	359.09	261.06	25.14	6.44	40	>sp|O15031|PLXB2_HUMAN Plexin-B2 OS=Homo sapiens GN=PLXNB2 PE=1 SV=3	13258	Caco2P7_diffgpep1.18106.18106.4	controllerType=0 controllerNumber=1 scan=18106	86.1838
27099:4	20	K.VVFLSPAVPEEPEAYN[+1971.719]LTVLIEMDGHR.A	HexNAc(5)Hex(5)Fuc(1)NeuAc(0)	N[+1972]	1249.81	4	4996.23	4997.25	-1	-4.7	1053	Specific	559.82	413.28	413.28	8.28	40	>sp|O15031|PLXB2_HUMAN Plexin-B2 OS=Homo sapiens GN=PLXNB2 PE=1 SV=3	13258	Caco2P7_diffgpep1.25826.25826.4	controllerType=0 controllerNumber=1 scan=25826	119.961
27075:4	20	K.VVFLSPAVPEEPEAYN[+1971.719]LTVLIEMDGHR.A	HexNAc(5)Hex(5)Fuc(1)NeuAc(0)	N[+1972]	1250.07	4	4997.26	4997.25	0	1.2	1053	Specific	652.42	488.13	488.13	12.7	40	>sp|O15031|PLXB2_HUMAN Plexin-B2 OS=Homo sapiens GN=PLXNB2 PE=1 SV=3	13258	Caco2P7_diffgpep1.25802.25802.4	controllerType=0 controllerNumber=1 scan=25802	119.854
28181:4	20	K.VVFLSPAVPEEPEAYN[+2262.814]LTVLIEMDGHR.A	HexNAc(5)Hex(5)Fuc(1)NeuAc(1)	N[+2263]	1322.85	4	5288.38	5288.35	0	5.9	1053	Specific	677.51	494.29	20.27	12.23	40	>sp|O15031|PLXB2_HUMAN Plexin-B2 OS=Homo sapiens GN=PLXNB2 PE=1 SV=3	13258	Caco2P7_diffgpep1.27719.27719.4	controllerType=0 controllerNumber=1 scan=27719	127.707
28201:4	20	K.VVFLSPAVPEEPEAYN[+2262.814]LTVLIEMDGHR.A	HexNAc(5)Hex(5)Fuc(1)NeuAc(1)	N[+2263]	1322.85	4	5288.36	5288.35	0	2.7	1053	Specific	815.48	680.92	24.37	15.68	40	>sp|O15031|PLXB2_HUMAN Plexin-B2 OS=Homo sapiens GN=PLXNB2 PE=1 SV=3	13258	Caco2P7_diffgpep1.27751.27751.4	controllerType=0 controllerNumber=1 scan=27751	127.834
25357:4	20	R.TEAGAFEYVPDPTFEN[+2262.814]FTGGVK.K	HexNAc(5)Hex(5)Fuc(1)NeuAc(1)	N[+2263]	1160.49	4	4638.95	4638.92	0	6	1084	Specific	204.12	112.88	19.55	2.06	40	>sp|O15031|PLXB2_HUMAN Plexin-B2 OS=Homo sapiens GN=PLXNB2 PE=1 SV=3	13258	Caco2P7_diffgpep1.23486.23486.4	controllerType=0 controllerNumber=1 scan=23486	110.305
23356:4	20	R.TEAGAFEYVPDPTFEN[+1971.719]FTGGVK.K	HexNAc(5)Hex(5)Fuc(1)NeuAc(0)	N[+1972]	1087.71	4	4347.83	4347.82	0	2.7	1084	Specific	206.13	180.72	180.72	4.08	40	>sp|O15031|PLXB2_HUMAN Plexin-B2 OS=Homo sapiens GN=PLXNB2 PE=1 SV=3	13258	Caco2P7_diffgpep1.21314.21314.4	controllerType=0 controllerNumber=1 scan=21314	101
23512:3	20	R.TEAGAFEYVPDPTFEN[+1809.666]FTGGVK.K	HexNAc(5)Hex(4)Fuc(1)NeuAc(0)	N[+1810]	1395.59	3	4184.76	4185.77	-1	-0.6	1084	Specific	278.48	199.72	199.72	5.84	40	>sp|O15031|PLXB2_HUMAN Plexin-B2 OS=Homo sapiens GN=PLXNB2 PE=1 SV=3	13258	Caco2P7_diffgpep1.21449.21449.4	controllerType=0 controllerNumber=1 scan=21449	101.605
23329:3	20	R.TEAGAFEYVPDPTFEN[+1971.719]FTGGVK.K	HexNAc(5)Hex(5)Fuc(1)NeuAc(0)	N[+1972]	1449.61	3	4346.83	4347.82	-1	1.7	1084	Specific	296.75	233.02	233.02	6.32	40	>sp|O15031|PLXB2_HUMAN Plexin-B2 OS=Homo sapiens GN=PLXNB2 PE=1 SV=3	13258	Caco2P7_diffgpep1.21291.21291.3	controllerType=0 controllerNumber=1 scan=21291	100.898
25302:3	20	R.TEAGAFEYVPDPTFEN[+2262.814]FTGGVK.K	HexNAc(5)Hex(5)Fuc(1)NeuAc(1)	N[+2263]	1546.98	3	4638.93	4638.92	0	2.7	1084	Specific	354.23	248.16	29.47	6.4	40	>sp|O15031|PLXB2_HUMAN Plexin-B2 OS=Homo sapiens GN=PLXNB2 PE=1 SV=3	13258	Caco2P7_diffgpep1.23434.23434.3	controllerType=0 controllerNumber=1 scan=23434	110.079
23351:3	20	R.TEAGAFEYVPDPTFEN[+1864.634]FTGGVK.K	HexNAc(2)Hex(9)Fuc(0)NeuAc(0)	N[+1865]	1414.26	3	4240.75	4240.74	0	3.4	1084	Specific	421.18	275.69	275.69	6.74	40	>sp|O15031|PLXB2_HUMAN Plexin-B2 OS=Homo sapiens GN=PLXNB2 PE=1 SV=3	13258	Caco2P7_diffgpep1.21309.21309.3	controllerType=0 controllerNumber=1 scan=21309	100.981
23443:3	20	R.TEAGAFEYVPDPTFEN[+1702.581]FTGGVK.K	HexNAc(2)Hex(8)Fuc(0)NeuAc(0)	N[+1703]	1360.56	3	4079.68	4078.68	1	-2.1	1084	Specific	421.21	275.17	275.17	6.17	40	>sp|O15031|PLXB2_HUMAN Plexin-B2 OS=Homo sapiens GN=PLXNB2 PE=1 SV=3	13258	Caco2P7_diffgpep1.21390.21390.3	controllerType=0 controllerNumber=1 scan=21390	101.344
23470:3	20	R.TEAGAFEYVPDPTFEN[+1809.666]FTGGVK.K	HexNAc(5)Hex(4)Fuc(1)NeuAc(0)	N[+1810]	1395.94	3	4185.8	4185.77	0	7.5	1084	Specific	461.26	339.36	339.36	6.59	40	>sp|O15031|PLXB2_HUMAN Plexin-B2 OS=Homo sapiens GN=PLXNB2 PE=1 SV=3	13258	Caco2P7_diffgpep1.21416.21416.3	controllerType=0 controllerNumber=1 scan=21416	101.454
25273:4	20	R.TEAGAFEYVPDPTFEN[+2262.814]FTGGVK.K	HexNAc(5)Hex(5)Fuc(1)NeuAc(1)	N[+2263]	1160.49	4	4638.92	4638.92	0	1.5	1084	Specific	517.28	346.24	30.73	7.39	40	>sp|O15031|PLXB2_HUMAN Plexin-B2 OS=Homo sapiens GN=PLXNB2 PE=1 SV=3	13258	Caco2P7_diffgpep1.23396.23396.4	controllerType=0 controllerNumber=1 scan=23396	109.926
17247:4	23	R.VTNSNANAASPLIVAGYN[+1702.581]VSGSVR.S	HexNAc(2)Hex(8)Fuc(0)NeuAc(0)	N[+1703]	1016.71	4	4063.83	4063.8	0	8.1	201	Specific	259.23	253.75	253.75	5.26	23	>sp|Q5JPE7|NOMO2_HUMAN Nodal modulator 2 OS=Homo sapiens GN=NOMO2 PE=1 SV=1	11414	Caco2P7_diffgpep1.16286.16286.4	controllerType=0 controllerNumber=1 scan=16286	77.3677
17706:3	23	R.VTNSNANAASPLIVAGYN[+1864.634]VSGSVR.S	HexNAc(2)Hex(9)Fuc(0)NeuAc(0)	N[+1865]	1408.96	3	4224.88	4225.85	-1	7.3	201	Specific	278.13	246.03	246.03	5.74	23	>sp|Q5JPE7|NOMO2_HUMAN Nodal modulator 2 OS=Homo sapiens GN=NOMO2 PE=1 SV=1	11414	Caco2P7_diffgpep1.16638.16638.3	controllerType=0 controllerNumber=1 scan=16638	79.1464
17262:4	23	R.VTNSNANAASPLIVAGYN[+1864.634]VSGSVR.S	HexNAc(2)Hex(9)Fuc(0)NeuAc(0)	N[+1865]	1057.22	4	4225.86	4225.85	0	1.4	201	Specific	301.37	221.38	221.38	6.33	23	>sp|Q5JPE7|NOMO2_HUMAN Nodal modulator 2 OS=Homo sapiens GN=NOMO2 PE=1 SV=1	11414	Caco2P7_diffgpep1.16298.16298.4	controllerType=0 controllerNumber=1 scan=16298	77.4248
17252:3	23	R.VTNSNANAASPLIVAGYN[+2026.687]VSGSVR.S	HexNAc(2)Hex(10)Fuc(0)NeuAc(0)	N[+2027]	1463.3	3	4387.89	4387.9	0	-3.4	201	Specific	301.83	233.35	233.35	5.76	23	>sp|Q5JPE7|NOMO2_HUMAN Nodal modulator 2 OS=Homo sapiens GN=NOMO2 PE=1 SV=1	11414	Caco2P7_diffgpep1.16289.16289.3	controllerType=0 controllerNumber=1 scan=16289	77.3839
17781:3	23	R.VTNSNANAASPLIVAGYN[+1864.634]VSGSVR.S	HexNAc(2)Hex(9)Fuc(0)NeuAc(0)	N[+1865]	1409.63	3	4226.86	4225.85	1	2.2	201	Specific	329.08	268.08	14.08	6.59	23	>sp|Q5JPE7|NOMO2_HUMAN Nodal modulator 2 OS=Homo sapiens GN=NOMO2 PE=1 SV=1	11414	Caco2P7_diffgpep1.16693.16693.3	controllerType=0 controllerNumber=1 scan=16693	79.4176
17448:3	23	R.VTNSNANAASPLIVAGYN[+1378.476]VSGSVR.S	HexNAc(2)Hex(6)Fuc(0)NeuAc(0)	N[+1378]	1247.24	3	3739.7	3739.69	0	2.9	201	Specific	455.83	370.39	370.39	7.62	23	>sp|Q5JPE7|NOMO2_HUMAN Nodal modulator 2 OS=Homo sapiens GN=NOMO2 PE=1 SV=1	11414	Caco2P7_diffgpep1.16446.16446.3	controllerType=0 controllerNumber=1 scan=16446	78.1831
17425:3	23	R.VTNSNANAASPLIVAGYN[+1378.476]VSGSVR.S	HexNAc(2)Hex(6)Fuc(0)NeuAc(0)	N[+1378]	1247.24	3	3739.71	3739.69	0	3.8	201	Specific	525.33	519.37	519.37	9.25	23	>sp|Q5JPE7|NOMO2_HUMAN Nodal modulator 2 OS=Homo sapiens GN=NOMO2 PE=1 SV=1	11414	Caco2P7_diffgpep1.16428.16428.3	controllerType=0 controllerNumber=1 scan=16428	78.0928
17177:3	23	R.VTNSNANAASPLIVAGYN[+1864.634]VSGSVR.S	HexNAc(2)Hex(9)Fuc(0)NeuAc(0)	N[+1865]	1409.29	3	4225.86	4225.85	0	2.7	201	Specific	702.54	592.35	592.35	13.86	23	>sp|Q5JPE7|NOMO2_HUMAN Nodal modulator 2 OS=Homo sapiens GN=NOMO2 PE=1 SV=1	11414	Caco2P7_diffgpep1.16231.16231.3	controllerType=0 controllerNumber=1 scan=16231	77.0964
17245:3	23	R.VTNSNANAASPLIVAGYN[+1702.581]VSGSVR.S	HexNAc(2)Hex(8)Fuc(0)NeuAc(0)	N[+1703]	1355.27	3	4063.81	4063.8	0	2.4	201	Specific	809.23	704.58	704.58	15.86	23	>sp|Q5JPE7|NOMO2_HUMAN Nodal modulator 2 OS=Homo sapiens GN=NOMO2 PE=1 SV=1	11414	Caco2P7_diffgpep1.16285.16285.3	controllerType=0 controllerNumber=1 scan=16285	77.362
09531:3	23	R.LEN[+1378.476]ITTGTYTIHAQK.E	HexNAc(2)Hex(6)Fuc(0)NeuAc(0)	N[+1378]	1023.45	3	3068.35	3068.36	0	-2.6	367	Specific	446.06	309.59	309.59	6.21	23	>sp|Q5JPE7|NOMO2_HUMAN Nodal modulator 2 OS=Homo sapiens GN=NOMO2 PE=1 SV=1	11414	Caco2P7_diffgpep1.9872.9872.4	controllerType=0 controllerNumber=1 scan=9872	46.2838
09391:3	23	R.LEN[+1702.581]ITTGTYTIHAQK.E	HexNAc(2)Hex(8)Fuc(0)NeuAc(0)	N[+1703]	1131.49	3	3392.47	3392.46	0	2.4	367	Specific	457.97	320.35	320.35	6.97	23	>sp|Q5JPE7|NOMO2_HUMAN Nodal modulator 2 OS=Homo sapiens GN=NOMO2 PE=1 SV=1	11414	Caco2P7_diffgpep1.9755.9755.3	controllerType=0 controllerNumber=1 scan=9755	45.6984
09649:3	23	R.LEN[+1216.423]ITTGTYTIHAQK.E	HexNAc(2)Hex(5)Fuc(0)NeuAc(0)	N[+1216]	969.443	3	2906.32	2906.3	0	4.2	367	Specific	542.28	334.26	334.26	7.37	23	>sp|Q5JPE7|NOMO2_HUMAN Nodal modulator 2 OS=Homo sapiens GN=NOMO2 PE=1 SV=1	11414	Caco2P7_diffgpep1.9969.9969.4	controllerType=0 controllerNumber=1 scan=9969	46.7676
09672:3	23	R.LEN[+1216.423]ITTGTYTIHAQK.E	HexNAc(2)Hex(5)Fuc(0)NeuAc(0)	N[+1216]	969.442	3	2906.31	2906.3	0	2.7	367	Specific	624.44	368.06	368.06	10.15	23	>sp|Q5JPE7|NOMO2_HUMAN Nodal modulator 2 OS=Homo sapiens GN=NOMO2 PE=1 SV=1	11414	Caco2P7_diffgpep1.9986.9986.3	controllerType=0 controllerNumber=1 scan=9986	46.8521
09496:3	23	R.LEN[+1540.529]ITTGTYTIHAQK.E	HexNAc(2)Hex(7)Fuc(0)NeuAc(0)	N[+1541]	1077.48	3	3230.42	3230.41	0	2.3	367	Specific	777	628.46	628.46	14.54	23	>sp|Q5JPE7|NOMO2_HUMAN Nodal modulator 2 OS=Homo sapiens GN=NOMO2 PE=1 SV=1	11414	Caco2P7_diffgpep1.9843.9843.3	controllerType=0 controllerNumber=1 scan=9843	46.1383
09585:3	23	R.LEN[+1378.476]ITTGTYTIHAQK.E	HexNAc(2)Hex(6)Fuc(0)NeuAc(0)	N[+1378]	1023.46	3	3068.36	3068.36	0	1.4	367	Specific	793.41	529.01	529.01	14.67	23	>sp|Q5JPE7|NOMO2_HUMAN Nodal modulator 2 OS=Homo sapiens GN=NOMO2 PE=1 SV=1	11414	Caco2P7_diffgpep1.9918.9918.3	controllerType=0 controllerNumber=1 scan=9918	46.5118
10460:2	23	R.ENVGIYN[+1702.581]LSK.G	HexNAc(2)Hex(8)Fuc(0)NeuAc(0)	N[+1703]	1420.09	2	2839.18	2839.18	0	2.3	612	Specific	216.73	115.29	115.29	2.32	23	>sp|Q5JPE7|NOMO2_HUMAN Nodal modulator 2 OS=Homo sapiens GN=NOMO2 PE=1 SV=1	11414	Caco2P7_diffgpep1.10644.10644.2	controllerType=0 controllerNumber=1 scan=10644	50.0647
10473:2	23	R.ENVGIYN[+1540.529]LSK.G	HexNAc(2)Hex(7)Fuc(0)NeuAc(0)	N[+1541]	1339.07	2	2677.13	2677.12	0	4	612	Specific	313.54	173.63	173.63	5.62	23	>sp|Q5JPE7|NOMO2_HUMAN Nodal modulator 2 OS=Homo sapiens GN=NOMO2 PE=1 SV=1	11414	Caco2P7_diffgpep1.10656.10656.2	controllerType=0 controllerNumber=1 scan=10656	50.1208
10332:2	23	R.ENVGIYN[+1864.634]LSK.G	HexNAc(2)Hex(9)Fuc(0)NeuAc(0)	N[+1865]	1501.12	2	3001.24	3001.23	0	3.1	612	Specific	424.52	239.45	239.45	6.34	23	>sp|Q5JPE7|NOMO2_HUMAN Nodal modulator 2 OS=Homo sapiens GN=NOMO2 PE=1 SV=1	11414	Caco2P7_diffgpep1.10538.10538.2	controllerType=0 controllerNumber=1 scan=10538	49.5515
07358:3	24	R.IAPASN[+1702.581]VSHTVVLR.P	HexNAc(2)Hex(8)Fuc(0)NeuAc(0)	N[+1703]	1056.15	3	3166.44	3166.41	0	7	83	Specific	442.41	415.02	415.02	8.17	17	>sp|P43308|SSRB_HUMAN Translocon-associated protein subunit beta OS=Homo sapiens GN=SSR2 PE=1 SV=1	16542	Caco2P7_diffgpep1.7981.7981.3	controllerType=0 controllerNumber=1 scan=7981	37.1137
07354:3	24	R.IAPASN[+1864.634]VSHTVVLR.P	HexNAc(2)Hex(9)Fuc(0)NeuAc(0)	N[+1865]	1110.17	3	3328.48	3328.47	0	5.2	83	Specific	590.42	574.51	574.51	10.21	17	>sp|P43308|SSRB_HUMAN Translocon-associated protein subunit beta OS=Homo sapiens GN=SSR2 PE=1 SV=1	16542	Caco2P7_diffgpep1.7978.7978.3	controllerType=0 controllerNumber=1 scan=7978	37.0971
09128:4	24	R.IAPASN[+1378.476]VSHTVVLRPLK.A	HexNAc(2)Hex(6)Fuc(0)NeuAc(0)	N[+1378]	795.894	4	3180.55	3180.54	0	4	83	Specific	326.76	326.76	326.76	7.07	17	>sp|P43308|SSRB_HUMAN Translocon-associated protein subunit beta OS=Homo sapiens GN=SSR2 PE=1 SV=1	16542	Caco2P7_diffgpep1.9541.9541.4	controllerType=0 controllerNumber=1 scan=9541	44.6488
09057:4	24	R.IAPASN[+1864.634]VSHTVVLRPLK.A	HexNAc(2)Hex(9)Fuc(0)NeuAc(0)	N[+1865]	917.431	4	3666.7	3666.7	0	1.1	83	Specific	351.69	351.69	351.69	7.22	17	>sp|P43308|SSRB_HUMAN Translocon-associated protein subunit beta OS=Homo sapiens GN=SSR2 PE=1 SV=1	16542	Caco2P7_diffgpep1.9483.9483.4	controllerType=0 controllerNumber=1 scan=9483	44.3615
09124:4	24	R.IAPASN[+1702.581]VSHTVVLRPLK.A	HexNAc(2)Hex(8)Fuc(0)NeuAc(0)	N[+1703]	876.917	4	3504.65	3504.65	0	0.3	83	Specific	391.68	375.11	375.11	7.53	17	>sp|P43308|SSRB_HUMAN Translocon-associated protein subunit beta OS=Homo sapiens GN=SSR2 PE=1 SV=1	16542	Caco2P7_diffgpep1.9539.9539.4	controllerType=0 controllerNumber=1 scan=9539	44.6386
09034:3	24	R.IAPASN[+1378.476]VSHTVVLRPLK.A	HexNAc(2)Hex(6)Fuc(0)NeuAc(0)	N[+1378]	1060.86	3	3180.56	3180.54	0	7.3	83	Specific	397.83	397.83	397.83	7.46	17	>sp|P43308|SSRB_HUMAN Translocon-associated protein subunit beta OS=Homo sapiens GN=SSR2 PE=1 SV=1	16542	Caco2P7_diffgpep1.9466.9466.3	controllerType=0 controllerNumber=1 scan=9466	44.2777
08955:3	24	R.IAPASN[+1702.581]VSHTVVLRPLK.A	HexNAc(2)Hex(8)Fuc(0)NeuAc(0)	N[+1703]	1168.89	3	3504.64	3504.65	0	-1.4	83	Specific	478.64	478.64	478.64	7.79	17	>sp|P43308|SSRB_HUMAN Translocon-associated protein subunit beta OS=Homo sapiens GN=SSR2 PE=1 SV=1	16542	Caco2P7_diffgpep1.9394.9394.3	controllerType=0 controllerNumber=1 scan=9394	43.9419
09058:3	24	R.IAPASN[+1864.634]VSHTVVLRPLK.A	HexNAc(2)Hex(9)Fuc(0)NeuAc(0)	N[+1865]	1222.91	3	3666.71	3666.7	0	1.8	83	Specific	481.31	469.46	469.46	8.55	17	>sp|P43308|SSRB_HUMAN Translocon-associated protein subunit beta OS=Homo sapiens GN=SSR2 PE=1 SV=1	16542	Caco2P7_diffgpep1.9484.9484.3	controllerType=0 controllerNumber=1 scan=9484	44.3638
08982:3	24	R.IAPASN[+1540.529]VSHTVVLRPLK.A	HexNAc(2)Hex(7)Fuc(0)NeuAc(0)	N[+1541]	1114.87	3	3342.58	3342.59	0	-2.9	83	Specific	503.87	498.87	498.87	7.84	17	>sp|P43308|SSRB_HUMAN Translocon-associated protein subunit beta OS=Homo sapiens GN=SSR2 PE=1 SV=1	16542	Caco2P7_diffgpep1.9418.9418.3	controllerType=0 controllerNumber=1 scan=9418	44.044
08962:3	24	R.IAPASN[+1702.581]VSHTVVLRPLK.A	HexNAc(2)Hex(8)Fuc(0)NeuAc(0)	N[+1703]	1168.89	3	3504.64	3504.65	0	-0.5	83	Specific	527.04	527.04	527.04	8.36	17	>sp|P43308|SSRB_HUMAN Translocon-associated protein subunit beta OS=Homo sapiens GN=SSR2 PE=1 SV=1	16542	Caco2P7_diffgpep1.9401.9401.3	controllerType=0 controllerNumber=1 scan=9401	43.9723
08905:3	24	R.IAPASN[+1864.634]VSHTVVLRPLK.A	HexNAc(2)Hex(9)Fuc(0)NeuAc(0)	N[+1865]	1222.91	3	3666.71	3666.7	0	2.6	83	Specific	536.84	529.92	529.92	8.6	17	>sp|P43308|SSRB_HUMAN Translocon-associated protein subunit beta OS=Homo sapiens GN=SSR2 PE=1 SV=1	16542	Caco2P7_diffgpep1.9347.9347.3	controllerType=0 controllerNumber=1 scan=9347	43.711
08898:4	24	R.IAPASN[+1864.634]VSHTVVLRPLK.A	HexNAc(2)Hex(9)Fuc(0)NeuAc(0)	N[+1865]	917.432	4	3666.71	3666.7	0	1.8	83	Specific	546.99	546.99	546.99	9.77	17	>sp|P43308|SSRB_HUMAN Translocon-associated protein subunit beta OS=Homo sapiens GN=SSR2 PE=1 SV=1	16542	Caco2P7_diffgpep1.9343.9343.4	controllerType=0 controllerNumber=1 scan=9343	43.6908
08961:4	24	R.IAPASN[+1702.581]VSHTVVLRPLK.A	HexNAc(2)Hex(8)Fuc(0)NeuAc(0)	N[+1703]	876.918	4	3504.65	3504.65	0	1.8	83	Specific	548.6	548.6	548.6	9.77	17	>sp|P43308|SSRB_HUMAN Translocon-associated protein subunit beta OS=Homo sapiens GN=SSR2 PE=1 SV=1	16542	Caco2P7_diffgpep1.9400.9400.4	controllerType=0 controllerNumber=1 scan=9400	43.97
09001:4	24	R.IAPASN[+1540.529]VSHTVVLRPLK.A	HexNAc(2)Hex(7)Fuc(0)NeuAc(0)	N[+1541]	836.403	4	3342.59	3342.59	0	-0.6	83	Specific	567.73	567.73	567.73	9.53	17	>sp|P43308|SSRB_HUMAN Translocon-associated protein subunit beta OS=Homo sapiens GN=SSR2 PE=1 SV=1	16542	Caco2P7_diffgpep1.9437.9437.4	controllerType=0 controllerNumber=1 scan=9437	44.1338
08968:4	24	R.IAPASN[+1540.529]VSHTVVLRPLK.A	HexNAc(2)Hex(7)Fuc(0)NeuAc(0)	N[+1541]	836.409	4	3342.61	3342.59	0	6.2	83	Specific	632.17	632.17	632.17	11.6	17	>sp|P43308|SSRB_HUMAN Translocon-associated protein subunit beta OS=Homo sapiens GN=SSR2 PE=1 SV=1	16542	Caco2P7_diffgpep1.9406.9406.5	controllerType=0 controllerNumber=1 scan=9406	43.9928
28590:5	24	K.AGYFN[+1540.529]FTSATITYLAQEDGPVVIGSTSAPGQGGILAQR.E	HexNAc(2)Hex(7)Fuc(0)NeuAc(0)	N[+1541]	1080.3	5	5397.48	5398.46	-1	4.1	100	Specific	174.43	174.43	174.43	3.92	17	>sp|P43308|SSRB_HUMAN Translocon-associated protein subunit beta OS=Homo sapiens GN=SSR2 PE=1 SV=1	16542	Caco2P7_diffgpep1.28708.28708.5	controllerType=0 controllerNumber=1 scan=28708	131.779
28550:4	24	K.AGYFN[+1460.529]FTSATITYLAQEDGPVVIGSTSAPGQGGILAQR.E	HexNAc(4)Hex(4)Fuc(0)NeuAc(0)	N[+1461]	1330.63	4	5319.52	5318.46	1	9.3	100	Specific	207.06	207.06	207.06	3.5	17	>sp|P43308|SSRB_HUMAN Translocon-associated protein subunit beta OS=Homo sapiens GN=SSR2 PE=1 SV=1	16542	Caco2P7_diffgpep1.28618.28618.4	controllerType=0 controllerNumber=1 scan=28618	131.414
28581:5	24	K.AGYFN[+1444.534]FTSATITYLAQEDGPVVIGSTSAPGQGGILAQR.E	HexNAc(4)Hex(3)Fuc(1)NeuAc(0)	N[+1445]	1061.3	5	5302.49	5302.47	0	4.9	100	Specific	216.13	216.13	216.13	3.12	17	>sp|P43308|SSRB_HUMAN Translocon-associated protein subunit beta OS=Homo sapiens GN=SSR2 PE=1 SV=1	16542	Caco2P7_diffgpep1.28680.28680.5	controllerType=0 controllerNumber=1 scan=28680	131.666
28555:5	24	K.AGYFN[+1444.534]FTSATITYLAQEDGPVVIGSTSAPGQGGILAQR.E	HexNAc(4)Hex(3)Fuc(1)NeuAc(0)	N[+1445]	1061.3	5	5302.48	5302.47	0	2.6	100	Specific	221.06	221.06	221.06	5.56	17	>sp|P43308|SSRB_HUMAN Translocon-associated protein subunit beta OS=Homo sapiens GN=SSR2 PE=1 SV=1	16542	Caco2P7_diffgpep1.28632.28632.5	controllerType=0 controllerNumber=1 scan=28632	131.472
28647:4	24	K.AGYFN[+1257.449]FTSATITYLAQEDGPVVIGSTSAPGQGGILAQR.E	HexNAc(3)Hex(4)Fuc(0)NeuAc(0)	N[+1257]	1279.61	4	5115.42	5115.38	0	7.7	100	Specific	221.57	187.26	187.26	5.31	17	>sp|P43308|SSRB_HUMAN Translocon-associated protein subunit beta OS=Homo sapiens GN=SSR2 PE=1 SV=1	16542	Caco2P7_diffgpep1.28824.28824.4	controllerType=0 controllerNumber=1 scan=28824	132.263
28498:5	24	K.AGYFN[+1702.581]FTSATITYLAQEDGPVVIGSTSAPGQGGILAQR.E	HexNAc(2)Hex(8)Fuc(0)NeuAc(0)	N[+1703]	1112.91	5	5560.53	5560.52	0	2.7	100	Specific	276.97	267.15	267.15	6.09	17	>sp|P43308|SSRB_HUMAN Translocon-associated protein subunit beta OS=Homo sapiens GN=SSR2 PE=1 SV=1	16542	Caco2P7_diffgpep1.28515.28515.5	controllerType=0 controllerNumber=1 scan=28515	130.993
28522:5	24	K.AGYFN[+1864.634]FTSATITYLAQEDGPVVIGSTSAPGQGGILAQR.E	HexNAc(2)Hex(9)Fuc(0)NeuAc(0)	N[+1865]	1145.32	5	5722.59	5722.57	0	3.1	100	Specific	282.9	282.9	282.9	6.23	17	>sp|P43308|SSRB_HUMAN Translocon-associated protein subunit beta OS=Homo sapiens GN=SSR2 PE=1 SV=1	16542	Caco2P7_diffgpep1.28571.28571.5	controllerType=0 controllerNumber=1 scan=28571	131.227
28554:4	24	K.AGYFN[+1460.529]FTSATITYLAQEDGPVVIGSTSAPGQGGILAQR.E	HexNAc(4)Hex(4)Fuc(0)NeuAc(0)	N[+1461]	1330.63	4	5319.52	5318.46	1	9.6	100	Specific	313.53	289.94	289.94	5.74	17	>sp|P43308|SSRB_HUMAN Translocon-associated protein subunit beta OS=Homo sapiens GN=SSR2 PE=1 SV=1	16542	Caco2P7_diffgpep1.28631.28631.4	controllerType=0 controllerNumber=1 scan=28631	131.466
28535:3	24	K.AGYFN[+1702.581]FTSATITYLAQEDGPVVIGSTSAPGQGGILAQR.E	HexNAc(2)Hex(8)Fuc(0)NeuAc(0)	N[+1703]	1853.85	3	5559.55	5560.52	-1	6	100	Specific	339.99	337.94	337.94	6.77	17	>sp|P43308|SSRB_HUMAN Translocon-associated protein subunit beta OS=Homo sapiens GN=SSR2 PE=1 SV=1	16542	Caco2P7_diffgpep1.28589.28589.3	controllerType=0 controllerNumber=1 scan=28589	131.302
28664:4	24	K.AGYFN[+1702.581]FTSATITYLAQEDGPVVIGSTSAPGQGGILAQR.E	HexNAc(2)Hex(8)Fuc(0)NeuAc(0)	N[+1703]	1390.88	4	5560.51	5560.52	0	-0.3	100	Specific	354.23	329.07	329.07	6.77	17	>sp|P43308|SSRB_HUMAN Translocon-associated protein subunit beta OS=Homo sapiens GN=SSR2 PE=1 SV=1	16542	Caco2P7_diffgpep1.28871.28871.4	controllerType=0 controllerNumber=1 scan=28871	132.458
28686:4	24	K.AGYFN[+1702.581]FTSATITYLAQEDGPVVIGSTSAPGQGGILAQR.E	HexNAc(2)Hex(8)Fuc(0)NeuAc(0)	N[+1703]	1390.88	4	5560.52	5560.52	0	0.4	100	Specific	412.33	382.98	382.98	9.03	17	>sp|P43308|SSRB_HUMAN Translocon-associated protein subunit beta OS=Homo sapiens GN=SSR2 PE=1 SV=1	16542	Caco2P7_diffgpep1.28931.28931.4	controllerType=0 controllerNumber=1 scan=28931	132.707
28704:4	24	K.AGYFN[+1378.476]FTSATITYLAQEDGPVVIGSTSAPGQGGILAQR.E	HexNAc(2)Hex(6)Fuc(0)NeuAc(0)	N[+1378]	1310.11	4	5237.42	5236.41	1	0.4	100	Specific	414.94	373.21	373.21	7.64	17	>sp|P43308|SSRB_HUMAN Translocon-associated protein subunit beta OS=Homo sapiens GN=SSR2 PE=1 SV=1	16542	Caco2P7_diffgpep1.28997.28997.4	controllerType=0 controllerNumber=1 scan=28997	132.991
28673:4	24	K.AGYFN[+1702.581]FTSATITYLAQEDGPVVIGSTSAPGQGGILAQR.E	HexNAc(2)Hex(8)Fuc(0)NeuAc(0)	N[+1703]	1391.13	4	5561.52	5560.52	1	-0.7	100	Specific	439.99	399.81	399.81	8.81	17	>sp|P43308|SSRB_HUMAN Translocon-associated protein subunit beta OS=Homo sapiens GN=SSR2 PE=1 SV=1	16542	Caco2P7_diffgpep1.28889.28889.4	controllerType=0 controllerNumber=1 scan=28889	132.531
28576:5	24	K.AGYFN[+1378.476]FTSATITYLAQEDGPVVIGSTSAPGQGGILAQR.E	HexNAc(2)Hex(6)Fuc(0)NeuAc(0)	N[+1378]	1048.09	5	5236.42	5236.41	0	1.5	100	Specific	442.82	442.82	442.82	8.86	17	>sp|P43308|SSRB_HUMAN Translocon-associated protein subunit beta OS=Homo sapiens GN=SSR2 PE=1 SV=1	16542	Caco2P7_diffgpep1.28668.28668.5	controllerType=0 controllerNumber=1 scan=28668	131.618
28587:3	24	K.AGYFN[+1378.476]FTSATITYLAQEDGPVVIGSTSAPGQGGILAQR.E	HexNAc(2)Hex(6)Fuc(0)NeuAc(0)	N[+1378]	1745.81	3	5235.42	5236.41	-1	1.6	100	Specific	456.09	400.54	400.54	9.47	17	>sp|P43308|SSRB_HUMAN Translocon-associated protein subunit beta OS=Homo sapiens GN=SSR2 PE=1 SV=1	16542	Caco2P7_diffgpep1.28701.28701.3	controllerType=0 controllerNumber=1 scan=28701	131.751
28529:4	24	K.AGYFN[+1647.613]FTSATITYLAQEDGPVVIGSTSAPGQGGILAQR.E	HexNAc(5)Hex(3)Fuc(1)NeuAc(0)	N[+1648]	1377.14	4	5505.55	5505.55	0	-0.4	100	Specific	469.44	413.21	413.21	8.9	17	>sp|P43308|SSRB_HUMAN Translocon-associated protein subunit beta OS=Homo sapiens GN=SSR2 PE=1 SV=1	16542	Caco2P7_diffgpep1.28579.28579.4	controllerType=0 controllerNumber=1 scan=28579	131.261
28644:4	24	K.AGYFN[+1540.529]FTSATITYLAQEDGPVVIGSTSAPGQGGILAQR.E	HexNAc(2)Hex(7)Fuc(0)NeuAc(0)	N[+1541]	1350.37	4	5398.46	5398.46	0	0.1	100	Specific	472.29	373.97	373.97	7.51	17	>sp|P43308|SSRB_HUMAN Translocon-associated protein subunit beta OS=Homo sapiens GN=SSR2 PE=1 SV=1	16542	Caco2P7_diffgpep1.28822.28822.4	controllerType=0 controllerNumber=1 scan=28822	132.252
28536:4	24	K.AGYFN[+1647.613]FTSATITYLAQEDGPVVIGSTSAPGQGGILAQR.E	HexNAc(5)Hex(3)Fuc(1)NeuAc(0)	N[+1648]	1377.15	4	5505.56	5505.55	0	2.8	100	Specific	473.34	456.27	456.27	9.14	17	>sp|P43308|SSRB_HUMAN Translocon-associated protein subunit beta OS=Homo sapiens GN=SSR2 PE=1 SV=1	16542	Caco2P7_diffgpep1.28591.28591.4	controllerType=0 controllerNumber=1 scan=28591	131.309
28635:4	24	K.AGYFN[+1298.476]FTSATITYLAQEDGPVVIGSTSAPGQGGILAQR.E	HexNAc(4)Hex(3)Fuc(0)NeuAc(0)	N[+1298]	1289.61	4	5155.43	5156.41	-1	4.4	100	Specific	524.83	510	510	9.07	17	>sp|P43308|SSRB_HUMAN Translocon-associated protein subunit beta OS=Homo sapiens GN=SSR2 PE=1 SV=1	16542	Caco2P7_diffgpep1.28806.28806.4	controllerType=0 controllerNumber=1 scan=28806	132.188
28582:5	24	K.AGYFN[+1378.476]FTSATITYLAQEDGPVVIGSTSAPGQGGILAQR.E	HexNAc(2)Hex(6)Fuc(0)NeuAc(0)	N[+1378]	1048.09	5	5236.42	5236.41	0	2.5	100	Specific	530.43	506.21	506.21	9	17	>sp|P43308|SSRB_HUMAN Translocon-associated protein subunit beta OS=Homo sapiens GN=SSR2 PE=1 SV=1	16542	Caco2P7_diffgpep1.28682.28682.5	controllerType=0 controllerNumber=1 scan=28682	131.673
28755:4	24	K.AGYFN[+1702.581]FTSATITYLAQEDGPVVIGSTSAPGQGGILAQR.E	HexNAc(2)Hex(8)Fuc(0)NeuAc(0)	N[+1703]	1390.64	4	5559.52	5560.52	-1	2	100	Specific	551.86	494	494	9.69	17	>sp|P43308|SSRB_HUMAN Translocon-associated protein subunit beta OS=Homo sapiens GN=SSR2 PE=1 SV=1	16542	Caco2P7_diffgpep1.29189.29189.4	controllerType=0 controllerNumber=1 scan=29189	133.811
28760:4	24	K.AGYFN[+1702.581]FTSATITYLAQEDGPVVIGSTSAPGQGGILAQR.E	HexNAc(2)Hex(8)Fuc(0)NeuAc(0)	N[+1703]	1390.88	4	5560.51	5560.52	0	-1	100	Specific	592.17	519.63	519.63	10.46	17	>sp|P43308|SSRB_HUMAN Translocon-associated protein subunit beta OS=Homo sapiens GN=SSR2 PE=1 SV=1	16542	Caco2P7_diffgpep1.29223.29223.4	controllerType=0 controllerNumber=1 scan=29223	133.958
28542:5	24	K.AGYFN[+1540.529]FTSATITYLAQEDGPVVIGSTSAPGQGGILAQR.E	HexNAc(2)Hex(7)Fuc(0)NeuAc(0)	N[+1541]	1080.3	5	5397.48	5398.46	-1	3.1	100	Specific	612.65	612.65	612.65	11.56	17	>sp|P43308|SSRB_HUMAN Translocon-associated protein subunit beta OS=Homo sapiens GN=SSR2 PE=1 SV=1	16542	Caco2P7_diffgpep1.28606.28606.5	controllerType=0 controllerNumber=1 scan=28606	131.369
28790:4	24	K.AGYFN[+1540.529]FTSATITYLAQEDGPVVIGSTSAPGQGGILAQR.E	HexNAc(2)Hex(7)Fuc(0)NeuAc(0)	N[+1541]	1350.62	4	5399.46	5398.46	1	-1.7	100	Specific	645.6	552.13	552.13	11.46	17	>sp|P43308|SSRB_HUMAN Translocon-associated protein subunit beta OS=Homo sapiens GN=SSR2 PE=1 SV=1	16542	Caco2P7_diffgpep1.29272.29272.4	controllerType=0 controllerNumber=1 scan=29272	134.162
28659:4	24	K.AGYFN[+1378.476]FTSATITYLAQEDGPVVIGSTSAPGQGGILAQR.E	HexNAc(2)Hex(6)Fuc(0)NeuAc(0)	N[+1378]	1309.62	4	5235.44	5236.41	-1	6.5	100	Specific	683.23	627.52	627.52	12.46	17	>sp|P43308|SSRB_HUMAN Translocon-associated protein subunit beta OS=Homo sapiens GN=SSR2 PE=1 SV=1	16542	Caco2P7_diffgpep1.28857.28857.4	controllerType=0 controllerNumber=1 scan=28857	132.4
28762:4	24	K.AGYFN[+1702.581]FTSATITYLAQEDGPVVIGSTSAPGQGGILAQR.E	HexNAc(2)Hex(8)Fuc(0)NeuAc(0)	N[+1703]	1391.14	4	5561.52	5560.52	1	0.4	100	Specific	693.55	582.88	582.88	13.01	17	>sp|P43308|SSRB_HUMAN Translocon-associated protein subunit beta OS=Homo sapiens GN=SSR2 PE=1 SV=1	16542	Caco2P7_diffgpep1.29226.29226.4	controllerType=0 controllerNumber=1 scan=29226	133.97
28487:4	24	K.AGYFN[+1864.634]FTSATITYLAQEDGPVVIGSTSAPGQGGILAQR.E	HexNAc(2)Hex(9)Fuc(0)NeuAc(0)	N[+1865]	1431.4	4	5722.59	5722.57	0	4	100	Specific	708.5	582.23	582.23	13.96	17	>sp|P43308|SSRB_HUMAN Translocon-associated protein subunit beta OS=Homo sapiens GN=SSR2 PE=1 SV=1	16542	Caco2P7_diffgpep1.28489.28489.4	controllerType=0 controllerNumber=1 scan=28489	130.893
28611:4	24	K.AGYFN[+1702.581]FTSATITYLAQEDGPVVIGSTSAPGQGGILAQR.E	HexNAc(2)Hex(8)Fuc(0)NeuAc(0)	N[+1703]	1390.89	4	5560.52	5560.52	0	0.8	100	Specific	720.47	612.99	612.99	14.01	17	>sp|P43308|SSRB_HUMAN Translocon-associated protein subunit beta OS=Homo sapiens GN=SSR2 PE=1 SV=1	16542	Caco2P7_diffgpep1.28738.28738.4	controllerType=0 controllerNumber=1 scan=28738	131.907
28534:4	24	K.AGYFN[+1444.534]FTSATITYLAQEDGPVVIGSTSAPGQGGILAQR.E	HexNAc(4)Hex(3)Fuc(1)NeuAc(0)	N[+1445]	1326.63	4	5303.51	5302.47	1	7.5	100	Specific	762.71	762.71	762.71	14.42	17	>sp|P43308|SSRB_HUMAN Translocon-associated protein subunit beta OS=Homo sapiens GN=SSR2 PE=1 SV=1	16542	Caco2P7_diffgpep1.28586.28586.4	controllerType=0 controllerNumber=1 scan=28586	131.291
28509:4	24	K.AGYFN[+1540.529]FTSATITYLAQEDGPVVIGSTSAPGQGGILAQR.E	HexNAc(2)Hex(7)Fuc(0)NeuAc(0)	N[+1541]	1350.38	4	5398.49	5398.46	0	4.6	100	Specific	780.16	675.97	675.97	14.67	17	>sp|P43308|SSRB_HUMAN Translocon-associated protein subunit beta OS=Homo sapiens GN=SSR2 PE=1 SV=1	16542	Caco2P7_diffgpep1.28548.28548.4	controllerType=0 controllerNumber=1 scan=28548	131.136
28479:4	24	K.AGYFN[+1702.581]FTSATITYLAQEDGPVVIGSTSAPGQGGILAQR.E	HexNAc(2)Hex(8)Fuc(0)NeuAc(0)	N[+1703]	1390.89	4	5560.55	5560.52	0	5.3	100	Specific	802.81	711.65	711.65	15.67	17	>sp|P43308|SSRB_HUMAN Translocon-associated protein subunit beta OS=Homo sapiens GN=SSR2 PE=1 SV=1	16542	Caco2P7_diffgpep1.28474.28474.4	controllerType=0 controllerNumber=1 scan=28474	130.834
28600:4	24	K.AGYFN[+1241.454]FTSATITYLAQEDGPVVIGSTSAPGQGGILAQR.E	HexNAc(3)Hex(3)Fuc(1)NeuAc(0)	N[+1241]	1275.61	4	5099.4	5099.39	0	2.4	100	Specific	805.61	761.85	761.85	16	17	>sp|P43308|SSRB_HUMAN Translocon-associated protein subunit beta OS=Homo sapiens GN=SSR2 PE=1 SV=1	16542	Caco2P7_diffgpep1.28725.28725.4	controllerType=0 controllerNumber=1 scan=28725	131.851
28620:4	24	K.AGYFN[+1540.529]FTSATITYLAQEDGPVVIGSTSAPGQGGILAQR.E	HexNAc(2)Hex(7)Fuc(0)NeuAc(0)	N[+1541]	1350.38	4	5398.49	5398.46	0	5.4	100	Specific	824.04	734.34	734.34	15.54	17	>sp|P43308|SSRB_HUMAN Translocon-associated protein subunit beta OS=Homo sapiens GN=SSR2 PE=1 SV=1	16542	Caco2P7_diffgpep1.28762.28762.4	controllerType=0 controllerNumber=1 scan=28762	132.003
28608:4	24	K.AGYFN[+1241.454]FTSATITYLAQEDGPVVIGSTSAPGQGGILAQR.E	HexNAc(3)Hex(3)Fuc(1)NeuAc(0)	N[+1241]	1275.61	4	5099.4	5099.39	0	2.2	100	Specific	839.5	779.71	779.71	16.13	17	>sp|P43308|SSRB_HUMAN Translocon-associated protein subunit beta OS=Homo sapiens GN=SSR2 PE=1 SV=1	16542	Caco2P7_diffgpep1.28734.28734.4	controllerType=0 controllerNumber=1 scan=28734	131.889
28558:4	24	K.AGYFN[+1378.476]FTSATITYLAQEDGPVVIGSTSAPGQGGILAQR.E	HexNAc(2)Hex(6)Fuc(0)NeuAc(0)	N[+1378]	1309.87	4	5236.44	5236.41	0	5.4	100	Specific	953.69	845.51	845.51	18.54	17	>sp|P43308|SSRB_HUMAN Translocon-associated protein subunit beta OS=Homo sapiens GN=SSR2 PE=1 SV=1	16542	Caco2P7_diffgpep1.28638.28638.4	controllerType=0 controllerNumber=1 scan=28638	131.495
28541:4	24	K.AGYFN[+1444.534]FTSATITYLAQEDGPVVIGSTSAPGQGGILAQR.E	HexNAc(4)Hex(3)Fuc(1)NeuAc(0)	N[+1445]	1326.38	4	5302.49	5302.47	0	3.5	100	Specific	969.42	869.22	869.22	18.96	17	>sp|P43308|SSRB_HUMAN Translocon-associated protein subunit beta OS=Homo sapiens GN=SSR2 PE=1 SV=1	16542	Caco2P7_diffgpep1.28603.28603.4	controllerType=0 controllerNumber=1 scan=28603	131.358
28514:4	24	K.AGYFN[+1540.529]FTSATITYLAQEDGPVVIGSTSAPGQGGILAQR.E	HexNAc(2)Hex(7)Fuc(0)NeuAc(0)	N[+1541]	1350.37	4	5398.48	5398.46	0	2.4	100	Specific	994.69	852.58	852.58	19	17	>sp|P43308|SSRB_HUMAN Translocon-associated protein subunit beta OS=Homo sapiens GN=SSR2 PE=1 SV=1	16542	Caco2P7_diffgpep1.28555.28555.4	controllerType=0 controllerNumber=1 scan=28555	131.166
28561:4	24	K.AGYFN[+1378.476]FTSATITYLAQEDGPVVIGSTSAPGQGGILAQR.E	HexNAc(2)Hex(6)Fuc(0)NeuAc(0)	N[+1378]	1309.86	4	5236.43	5236.41	0	4.3	100	Specific	1043.28	921.85	921.85	19.67	17	>sp|P43308|SSRB_HUMAN Translocon-associated protein subunit beta OS=Homo sapiens GN=SSR2 PE=1 SV=1	16542	Caco2P7_diffgpep1.28645.28645.4	controllerType=0 controllerNumber=1 scan=28645	131.524
28488:4	24	K.AGYFN[+1702.581]FTSATITYLAQEDGPVVIGSTSAPGQGGILAQR.E	HexNAc(2)Hex(8)Fuc(0)NeuAc(0)	N[+1703]	1390.89	4	5560.54	5560.52	0	4.1	100	Specific	1045.15	904.58	904.58	19.96	17	>sp|P43308|SSRB_HUMAN Translocon-associated protein subunit beta OS=Homo sapiens GN=SSR2 PE=1 SV=1	16542	Caco2P7_diffgpep1.28491.28491.4	controllerType=0 controllerNumber=1 scan=28491	130.9
28619:4	24	K.AGYFN[+1216.423]FTSATITYLAQEDGPVVIGSTSAPGQGGILAQR.E	HexNAc(2)Hex(5)Fuc(0)NeuAc(0)	N[+1216]	1269.35	4	5074.38	5074.36	0	3.8	100	Specific	1073.34	1041.96	1041.96	20.96	17	>sp|P43308|SSRB_HUMAN Translocon-associated protein subunit beta OS=Homo sapiens GN=SSR2 PE=1 SV=1	16542	Caco2P7_diffgpep1.28757.28757.4	controllerType=0 controllerNumber=1 scan=28757	131.983
28636:4	24	K.AGYFN[+1378.476]FTSATITYLAQEDGPVVIGSTSAPGQGGILAQR.E	HexNAc(2)Hex(6)Fuc(0)NeuAc(0)	N[+1378]	1309.86	4	5236.42	5236.41	0	2.4	100	Specific	1112.55	932.82	932.82	22	17	>sp|P43308|SSRB_HUMAN Translocon-associated protein subunit beta OS=Homo sapiens GN=SSR2 PE=1 SV=1	16542	Caco2P7_diffgpep1.28809.28809.4	controllerType=0 controllerNumber=1 scan=28809	132.199
28517:4	24	K.AGYFN[+1864.634]FTSATITYLAQEDGPVVIGSTSAPGQGGILAQR.E	HexNAc(2)Hex(9)Fuc(0)NeuAc(0)	N[+1865]	1431.4	4	5722.59	5722.57	0	3.3	100	Specific	1128.38	984.38	984.38	21.96	17	>sp|P43308|SSRB_HUMAN Translocon-associated protein subunit beta OS=Homo sapiens GN=SSR2 PE=1 SV=1	16542	Caco2P7_diffgpep1.28561.28561.4	controllerType=0 controllerNumber=1 scan=28561	131.188
28593:4	24	K.AGYFN[+1540.529]FTSATITYLAQEDGPVVIGSTSAPGQGGILAQR.E	HexNAc(2)Hex(7)Fuc(0)NeuAc(0)	N[+1541]	1350.38	4	5398.48	5398.46	0	2.9	100	Specific	1166.8	1057.29	1057.29	23	17	>sp|P43308|SSRB_HUMAN Translocon-associated protein subunit beta OS=Homo sapiens GN=SSR2 PE=1 SV=1	16542	Caco2P7_diffgpep1.28711.28711.4	controllerType=0 controllerNumber=1 scan=28711	131.792
28572:4	24	K.AGYFN[+1702.581]FTSATITYLAQEDGPVVIGSTSAPGQGGILAQR.E	HexNAc(2)Hex(8)Fuc(0)NeuAc(0)	N[+1703]	1390.89	4	5560.53	5560.52	0	3.1	100	Specific	1202.51	1049.53	1049.53	24	17	>sp|P43308|SSRB_HUMAN Translocon-associated protein subunit beta OS=Homo sapiens GN=SSR2 PE=1 SV=1	16542	Caco2P7_diffgpep1.28662.28662.4	controllerType=0 controllerNumber=1 scan=28662	131.594
10090:3	25	K.QC[+57.021]N[+1216.423]GTSMC[+57.021]WC[+57.021]VNTAGVR.R	HexNAc(2)Hex(5)Fuc(0)NeuAc(0)	C[+57]*3, N[+1216]	1073.09	3	3217.25	3217.24	0	1.6	109	Specific	112.07	60.74	60.74	2.34	29	>sp|P16422|EPCAM_HUMAN Epithelial cell adhesion molecule OS=Homo sapiens GN=EPCAM PE=1 SV=2	5349	Caco2P7_diffgpep1.10339.10339.3	controllerType=0 controllerNumber=1 scan=10339	48.5749
16887:3	25	K.QC[+57.021]N[+1702.581]GTSMC[+57.021]WC[+57.021]VNTAGVR.R	HexNAc(2)Hex(8)Fuc(0)NeuAc(0)	C[+57]*3, N[+1703]	1235.14	3	3703.41	3703.4	0	2.1	109	Specific	222.51	89.84	89.84	4.92	29	>sp|P16422|EPCAM_HUMAN Epithelial cell adhesion molecule OS=Homo sapiens GN=EPCAM PE=1 SV=2	5349	Caco2P7_diffgpep1.16006.16006.3	controllerType=0 controllerNumber=1 scan=16006	75.9716
13309:3	25	K.QC[+57.021]N[+1216.423]GTSMC[+57.021]WC[+57.021]VNTAGVR.R	HexNAc(2)Hex(5)Fuc(0)NeuAc(0)	C[+57]*3, N[+1216]	1073.09	3	3217.25	3217.24	0	0.9	109	Specific	483.89	396.4	396.4	9.07	29	>sp|P16422|EPCAM_HUMAN Epithelial cell adhesion molecule OS=Homo sapiens GN=EPCAM PE=1 SV=2	5349	Caco2P7_diffgpep1.13123.13123.3	controllerType=0 controllerNumber=1 scan=13123	61.8291
12986:3	25	K.QC[+57.021]N[+1702.581]GTSMC[+57.021]WC[+57.021]VNTAGVR.R	HexNAc(2)Hex(8)Fuc(0)NeuAc(0)	C[+57]*3, N[+1703]	1235.14	3	3703.4	3703.4	0	-0.1	109	Specific	593.55	479.7	479.7	10.57	29	>sp|P16422|EPCAM_HUMAN Epithelial cell adhesion molecule OS=Homo sapiens GN=EPCAM PE=1 SV=2	5349	Caco2P7_diffgpep1.12868.12868.3	controllerType=0 controllerNumber=1 scan=12868	60.5711
13190:3	25	K.QC[+57.021]N[+1378.476]GTSMC[+57.021]WC[+57.021]VNTAGVR.R	HexNAc(2)Hex(6)Fuc(0)NeuAc(0)	C[+57]*3, N[+1378]	1127.1	3	3379.3	3379.3	0	1.1	109	Specific	613.65	523.21	523.21	11.83	29	>sp|P16422|EPCAM_HUMAN Epithelial cell adhesion molecule OS=Homo sapiens GN=EPCAM PE=1 SV=2	5349	Caco2P7_diffgpep1.13030.13030.3	controllerType=0 controllerNumber=1 scan=13030	61.3678
13067:3	25	K.QC[+57.021]N[+1540.529]GTSMC[+57.021]WC[+57.021]VNTAGVR.R	HexNAc(2)Hex(7)Fuc(0)NeuAc(0)	C[+57]*3, N[+1541]	1181.12	3	3541.36	3541.35	0	2.2	109	Specific	668.94	567.82	567.82	12.95	29	>sp|P16422|EPCAM_HUMAN Epithelial cell adhesion molecule OS=Homo sapiens GN=EPCAM PE=1 SV=2	5349	Caco2P7_diffgpep1.12936.12936.3	controllerType=0 controllerNumber=1 scan=12936	60.9045
13049:3	25	K.QC[+57.021]N[+1540.529]GTSMC[+57.021]WC[+57.021]VNTAGVR.R	HexNAc(2)Hex(7)Fuc(0)NeuAc(0)	C[+57]*3, N[+1541]	1181.12	3	3541.34	3541.35	0	-0.9	109	Specific	697.93	584.59	584.59	12.27	29	>sp|P16422|EPCAM_HUMAN Epithelial cell adhesion molecule OS=Homo sapiens GN=EPCAM PE=1 SV=2	5349	Caco2P7_diffgpep1.12921.12921.3	controllerType=0 controllerNumber=1 scan=12921	60.8313
13007:3	25	K.QC[+57.021]N[+1702.581]GTSMC[+57.021]WC[+57.021]VNTAGVR.R	HexNAc(2)Hex(8)Fuc(0)NeuAc(0)	C[+57]*3, N[+1703]	1235.14	3	3703.41	3703.4	0	2.5	109	Specific	817.99	701.68	701.68	15.81	29	>sp|P16422|EPCAM_HUMAN Epithelial cell adhesion molecule OS=Homo sapiens GN=EPCAM PE=1 SV=2	5349	Caco2P7_diffgpep1.12886.12886.3	controllerType=0 controllerNumber=1 scan=12886	60.6567
13030:3	25	K.Q[-17.027]C[+57.021]N[+1752.645]GTSMC[+57.021]WC[+57.021]VNTAGVR.R	HexNAc(4)Hex(4)Fuc(2)NeuAc(0)	C[+57]*3, N[+1753], Q[-17]	1246.15	3	3736.43	3736.44	0	-2.6	109	Specific	189.19	85.17	85.17	2.04	29	>sp|P16422|EPCAM_HUMAN Epithelial cell adhesion molecule OS=Homo sapiens GN=EPCAM PE=1 SV=2	5349	Caco2P7_diffgpep1.12906.12906.3	controllerType=0 controllerNumber=1 scan=12906	60.7577
16991:4	25	K.Q[-17.027]C[+57.021]N[+2731.958]GTSMC[+57.021]WC[+57.021]VNTAGVR.R	HexNAc(5)Hex(7)Fuc(0)NeuAc(2)	C[+57]*3, N[+2732], Q[-17]	1179.95	4	4716.8	4715.75	1	9.3	109	Specific	266	132.85	78.69	4.79	29	>sp|P16422|EPCAM_HUMAN Epithelial cell adhesion molecule OS=Homo sapiens GN=EPCAM PE=1 SV=2	5349	Caco2P7_diffgpep1.16086.16086.3	controllerType=0 controllerNumber=1 scan=16086	76.3718
17212:3	25	K.Q[-17.027]C[+57.021]N[+1216.423]GTSMC[+57.021]WC[+57.021]VNTAGVR.R	HexNAc(2)Hex(5)Fuc(0)NeuAc(0)	C[+57]*3, N[+1216], Q[-17]	1067.41	3	3200.23	3200.22	0	3.8	109	Specific	537.75	469.8	469.8	9.2	29	>sp|P16422|EPCAM_HUMAN Epithelial cell adhesion molecule OS=Homo sapiens GN=EPCAM PE=1 SV=2	5349	Caco2P7_diffgpep1.16256.16256.3	controllerType=0 controllerNumber=1 scan=16256	77.2201
17091:3	25	K.Q[-17.027]C[+57.021]N[+1378.476]GTSMC[+57.021]WC[+57.021]VNTAGVR.R	HexNAc(2)Hex(6)Fuc(0)NeuAc(0)	C[+57]*3, N[+1378], Q[-17]	1121.43	3	3362.27	3362.27	0	1.7	109	Specific	631.7	547.34	547.34	11.95	29	>sp|P16422|EPCAM_HUMAN Epithelial cell adhesion molecule OS=Homo sapiens GN=EPCAM PE=1 SV=2	5349	Caco2P7_diffgpep1.16162.16162.4	controllerType=0 controllerNumber=1 scan=16162	76.7531
17082:3	25	K.Q[-17.027]C[+57.021]N[+1378.476]GTSMC[+57.021]WC[+57.021]VNTAGVR.R	HexNAc(2)Hex(6)Fuc(0)NeuAc(0)	C[+57]*3, N[+1378], Q[-17]	1121.43	3	3362.27	3362.27	0	1.7	109	Specific	770.8	672.91	672.91	14.95	29	>sp|P16422|EPCAM_HUMAN Epithelial cell adhesion molecule OS=Homo sapiens GN=EPCAM PE=1 SV=2	5349	Caco2P7_diffgpep1.16156.16156.3	controllerType=0 controllerNumber=1 scan=16156	76.7203
16949:3	25	K.Q[-17.027]C[+57.021]N[+1540.529]GTSMC[+57.021]WC[+57.021]VNTAGVR.R	HexNAc(2)Hex(7)Fuc(0)NeuAc(0)	C[+57]*3, N[+1541], Q[-17]	1175.45	3	3524.33	3524.32	0	2.9	109	Specific	881.8	736.2	736.2	16.81	29	>sp|P16422|EPCAM_HUMAN Epithelial cell adhesion molecule OS=Homo sapiens GN=EPCAM PE=1 SV=2	5349	Caco2P7_diffgpep1.16053.16053.3	controllerType=0 controllerNumber=1 scan=16053	76.2073
28979:4	25	K.FITSILYENNVITIDLVQN[+2553.910]SSQK.T	HexNAc(5)Hex(5)Fuc(1)NeuAc(2)	N[+2554]	1298.84	4	5192.34	5193.3	-1	7.1	180	Specific	179.03	179.03	179.03	2.41	29	>sp|P16422|EPCAM_HUMAN Epithelial cell adhesion molecule OS=Homo sapiens GN=EPCAM PE=1 SV=2	5349	Caco2P7_diffgpep1.29898.29898.4	controllerType=0 controllerNumber=1 scan=29898	136.824
29007:4	25	K.FITSILYENNVITIDLVQN[+2351.851]SSQK.T	HexNAc(4)Hex(5)Fuc(3)NeuAc(1)	N[+2352]	1248.32	4	4990.25	4991.24	-1	2.9	180	Specific	197.64	175.93	29.47	4.01	29	>sp|P16422|EPCAM_HUMAN Epithelial cell adhesion molecule OS=Homo sapiens GN=EPCAM PE=1 SV=2	5349	Caco2P7_diffgpep1.30075.30075.4	controllerType=0 controllerNumber=1 scan=30075	137.589
27695:4	25	K.FITSILYENNVITIDLVQN[+2262.814]SSQK.T	HexNAc(5)Hex(5)Fuc(1)NeuAc(1)	N[+2263]	1226.56	4	4903.2	4902.21	1	-1.2	180	Specific	224.49	164.14	46.69	4.82	29	>sp|P16422|EPCAM_HUMAN Epithelial cell adhesion molecule OS=Homo sapiens GN=EPCAM PE=1 SV=2	5349	Caco2P7_diffgpep1.26838.26838.4	controllerType=0 controllerNumber=1 scan=26838	124.151
27933:4	25	K.FITSILYENNVITIDLVQN[+2059.735]SSQK.T	HexNAc(4)Hex(5)Fuc(1)NeuAc(1)	N[+2060]	1175.54	4	4699.15	4699.13	0	4	180	Specific	244.37	199.97	17.61	5.7	29	>sp|P16422|EPCAM_HUMAN Epithelial cell adhesion molecule OS=Homo sapiens GN=EPCAM PE=1 SV=2	5349	Caco2P7_diffgpep1.27231.27231.4	controllerType=0 controllerNumber=1 scan=27231	125.743
26384:4	25	K.FITSILYENNVITIDLVQN[+1809.666]SSQK.T	HexNAc(5)Hex(4)Fuc(1)NeuAc(0)	N[+1810]	1113.02	4	4449.08	4449.06	0	3.9	180	Specific	256.14	231.74	231.74	5.04	29	>sp|P16422|EPCAM_HUMAN Epithelial cell adhesion molecule OS=Homo sapiens GN=EPCAM PE=1 SV=2	5349	Caco2P7_diffgpep1.24899.24899.4	controllerType=0 controllerNumber=1 scan=24899	116.141
26288:4	25	K.FITSILYENNVITIDLVQN[+1971.719]SSQK.T	HexNAc(5)Hex(5)Fuc(1)NeuAc(0)	N[+1972]	1153.54	4	4611.12	4611.11	0	2.7	180	Specific	299.52	222.86	222.86	6.11	29	>sp|P16422|EPCAM_HUMAN Epithelial cell adhesion molecule OS=Homo sapiens GN=EPCAM PE=1 SV=2	5349	Caco2P7_diffgpep1.24756.24756.4	controllerType=0 controllerNumber=1 scan=24756	115.563
27984:4	25	K.FITSILYENNVITIDLVQN[+2262.814]SSQK.T	HexNAc(5)Hex(5)Fuc(1)NeuAc(1)	N[+2263]	1226.06	4	4901.23	4902.21	-1	5.9	180	Specific	318.95	236.19	236.19	5.73	29	>sp|P16422|EPCAM_HUMAN Epithelial cell adhesion molecule OS=Homo sapiens GN=EPCAM PE=1 SV=2	5349	Caco2P7_diffgpep1.27352.27352.4	controllerType=0 controllerNumber=1 scan=27352	126.23
26282:4	25	K.FITSILYENNVITIDLVQN[+1971.719]SSQK.T	HexNAc(5)Hex(5)Fuc(1)NeuAc(0)	N[+1972]	1153.54	4	4611.12	4611.11	0	2.2	180	Specific	321.77	259.29	259.29	6.33	29	>sp|P16422|EPCAM_HUMAN Epithelial cell adhesion molecule OS=Homo sapiens GN=EPCAM PE=1 SV=2	5349	Caco2P7_diffgpep1.24746.24746.4	controllerType=0 controllerNumber=1 scan=24746	115.523
27867:4	25	K.FITSILYENNVITIDLVQN[+2059.735]SSQK.T	HexNAc(4)Hex(5)Fuc(1)NeuAc(1)	N[+2060]	1175.54	4	4699.15	4699.13	0	5	180	Specific	322.27	248.91	19.9	6.01	29	>sp|P16422|EPCAM_HUMAN Epithelial cell adhesion molecule OS=Homo sapiens GN=EPCAM PE=1 SV=2	5349	Caco2P7_diffgpep1.27105.27105.4	controllerType=0 controllerNumber=1 scan=27105	125.23
27856:4	25	K.FITSILYENNVITIDLVQN[+2059.735]SSQK.T	HexNAc(4)Hex(5)Fuc(1)NeuAc(1)	N[+2060]	1175.28	4	4698.12	4699.13	-1	-1.8	180	Specific	327.15	266.2	266.2	5.82	29	>sp|P16422|EPCAM_HUMAN Epithelial cell adhesion molecule OS=Homo sapiens GN=EPCAM PE=1 SV=2	5349	Caco2P7_diffgpep1.27088.27088.4	controllerType=0 controllerNumber=1 scan=27088	125.16
27927:4	25	K.FITSILYENNVITIDLVQN[+2262.814]SSQK.T	HexNAc(5)Hex(5)Fuc(1)NeuAc(1)	N[+2263]	1226.31	4	4902.22	4902.21	0	3.3	180	Specific	553.76	514.76	26.94	9.2	29	>sp|P16422|EPCAM_HUMAN Epithelial cell adhesion molecule OS=Homo sapiens GN=EPCAM PE=1 SV=2	5349	Caco2P7_diffgpep1.27221.27221.4	controllerType=0 controllerNumber=1 scan=27221	125.701
27923:4	25	K.FITSILYENNVITIDLVQN[+2262.814]SSQK.T	HexNAc(5)Hex(5)Fuc(1)NeuAc(1)	N[+2263]	1226.31	4	4902.22	4902.21	0	1.9	180	Specific	576.93	460.53	29.65	9.51	29	>sp|P16422|EPCAM_HUMAN Epithelial cell adhesion molecule OS=Homo sapiens GN=EPCAM PE=1 SV=2	5349	Caco2P7_diffgpep1.27213.27213.4	controllerType=0 controllerNumber=1 scan=27213	125.669
27852:4	25	K.FITSILYENNVITIDLVQN[+2262.814]SSQK.T	HexNAc(5)Hex(5)Fuc(1)NeuAc(1)	N[+2263]	1226.31	4	4902.22	4902.21	0	2.7	180	Specific	607.09	530.21	25.92	11.65	29	>sp|P16422|EPCAM_HUMAN Epithelial cell adhesion molecule OS=Homo sapiens GN=EPCAM PE=1 SV=2	5349	Caco2P7_diffgpep1.27074.27074.4	controllerType=0 controllerNumber=1 scan=27074	125.104
27848:4	25	K.FITSILYENNVITIDLVQN[+2262.814]SSQK.T	HexNAc(5)Hex(5)Fuc(1)NeuAc(1)	N[+2263]	1226.06	4	4901.21	4902.21	-1	2.3	180	Specific	636.6	558.64	558.64	11.64	29	>sp|P16422|EPCAM_HUMAN Epithelial cell adhesion molecule OS=Homo sapiens GN=EPCAM PE=1 SV=2	5349	Caco2P7_diffgpep1.27068.27068.4	controllerType=0 controllerNumber=1 scan=27068	125.082
26412:8	26	R.LESGMQN[+2263.835]MSIHTKTTSGYAGGLSSAYGGLTSPGLSYSLGSSFGSGAGSSSFSR.T	HexNAc(5)Hex(5)Fuc(3)NeuAc(0)	N[+2264]	931.789	8	7447.27	7446.24	1	3.6	402	Specific	407.32	407.32	407.32	8.11	28	>sp|P05787|K2C8_HUMAN Keratin, type II cytoskeletal 8 OS=Homo sapiens GN=KRT8 PE=1 SV=7	8555	Caco2P7_diffgpep1.24946.24946.4	controllerType=0 controllerNumber=1 scan=24946	116.329
20111:3	28	K.SC[+57.021]GEC[+57.021]IQAGPNC[+57.021]GWC[+57.021]TN[+1702.581]STFLQEGMPTSAR.C	HexNAc(2)Hex(8)Fuc(0)NeuAc(0)	C[+57]*4, N[+1703]	1694.01	3	5080	5078.97	1	5	34	Specific	188.15	188.15	188.15	3.92	33	>sp|P05556|ITB1_HUMAN Integrin beta-1 OS=Homo sapiens GN=ITGB1 PE=1 SV=2	8370	Caco2P7_diffgpep1.18556.18556.3	controllerType=0 controllerNumber=1 scan=18556	88.2913
20030:4	28	K.SC[+57.021]GEC[+57.021]IQAGPNC[+57.021]GWC[+57.021]TN[+1702.581]STFLQEGMPTSAR.C	HexNAc(2)Hex(8)Fuc(0)NeuAc(0)	C[+57]*4, N[+1703]	1270.49	4	5078.95	5078.97	0	-5.1	34	Specific	789.11	690.08	690.08	13.57	33	>sp|P05556|ITB1_HUMAN Integrin beta-1 OS=Homo sapiens GN=ITGB1 PE=1 SV=2	8370	Caco2P7_diffgpep1.18492.18492.4	controllerType=0 controllerNumber=1 scan=18492	87.9795
20016:4	28	K.SC[+57.021]GEC[+57.021]IQAGPNC[+57.021]GWC[+57.021]TN[+1864.634]STFLQEGMPTSAR.C	HexNAc(2)Hex(9)Fuc(0)NeuAc(0)	C[+57]*4, N[+1865]	1310.77	4	5240.04	5241.02	-1	3.9	34	Specific	795.35	740.56	740.56	14.43	33	>sp|P05556|ITB1_HUMAN Integrin beta-1 OS=Homo sapiens GN=ITGB1 PE=1 SV=2	8370	Caco2P7_diffgpep1.18482.18482.4	controllerType=0 controllerNumber=1 scan=18482	87.9329
20080:4	28	K.SC[+57.021]GEC[+57.021]IQAGPNC[+57.021]GWC[+57.021]TN[+1702.581]STFLQEGMPTSAR.C	HexNAc(2)Hex(8)Fuc(0)NeuAc(0)	C[+57]*4, N[+1703]	1270.25	4	5077.96	5078.97	-1	-1.3	34	Specific	839.69	741.06	741.06	14.92	33	>sp|P05556|ITB1_HUMAN Integrin beta-1 OS=Homo sapiens GN=ITGB1 PE=1 SV=2	8370	Caco2P7_diffgpep1.18533.18533.4	controllerType=0 controllerNumber=1 scan=18533	88.1745
11188:4	28	K.LRNPC[+57.021]TSEQN[+2262.814]C[+57.021]TSPFSYK.N	HexNAc(5)Hex(5)Fuc(1)NeuAc(1)	C[+57]*2, N[+2263]	1113.7	4	4451.79	4451.79	0	-0.6	203	Specific	154.57	112.42	32.96	2.08	33	>sp|P05556|ITB1_HUMAN Integrin beta-1 OS=Homo sapiens GN=ITGB1 PE=1 SV=2	8370	Caco2P7_diffgpep1.11302.11302.4	controllerType=0 controllerNumber=1 scan=11302	53.1684
09759:4	28	K.LRNPC[+57.021]TSEQN[+1971.719]C[+57.021]TSPFSYK.N	HexNAc(5)Hex(5)Fuc(1)NeuAc(0)	C[+57]*2, N[+1972]	1040.93	4	4160.7	4160.69	0	0.3	203	Specific	167.72	98.5	98.5	2.11	33	>sp|P05556|ITB1_HUMAN Integrin beta-1 OS=Homo sapiens GN=ITGB1 PE=1 SV=2	8370	Caco2P7_diffgpep1.10062.10062.4	controllerType=0 controllerNumber=1 scan=10062	47.2138
09754:3	28	K.LRNPC[+57.021]TSEQN[+1971.719]C[+57.021]TSPFSYK.N	HexNAc(5)Hex(5)Fuc(1)NeuAc(0)	C[+57]*2, N[+1972]	1387.58	3	4160.72	4160.69	0	6	203	Specific	222.9	98.27	98.27	4.15	33	>sp|P05556|ITB1_HUMAN Integrin beta-1 OS=Homo sapiens GN=ITGB1 PE=1 SV=2	8370	Caco2P7_diffgpep1.10058.10058.3	controllerType=0 controllerNumber=1 scan=10058	47.1958
09716:3	28	K.LRNPC[+57.021]TSEQN[+1971.719]C[+57.021]TSPFSYK.N	HexNAc(5)Hex(5)Fuc(1)NeuAc(0)	C[+57]*2, N[+1972]	1387.57	3	4160.69	4160.69	0	0	203	Specific	245.17	122.83	122.83	4.95	33	>sp|P05556|ITB1_HUMAN Integrin beta-1 OS=Homo sapiens GN=ITGB1 PE=1 SV=2	8370	Caco2P7_diffgpep1.10028.10028.3	controllerType=0 controllerNumber=1 scan=10028	47.0529
09669:3	28	K.LRNPC[+57.021]TSEQN[+1540.529]C[+57.021]TSPFSYK.N	HexNAc(2)Hex(7)Fuc(0)NeuAc(0)	C[+57]*2, N[+1541]	1243.84	3	3729.51	3729.5	0	2.6	203	Specific	249.29	153.38	153.38	5.45	33	>sp|P05556|ITB1_HUMAN Integrin beta-1 OS=Homo sapiens GN=ITGB1 PE=1 SV=2	8370	Caco2P7_diffgpep1.9984.9984.3	controllerType=0 controllerNumber=1 scan=9984	46.8413
09653:3	28	K.LRNPC[+57.021]TSEQN[+1378.476]C[+57.021]TSPFSYK.N	HexNAc(2)Hex(6)Fuc(0)NeuAc(0)	C[+57]*2, N[+1378]	1189.82	3	3567.44	3567.45	0	-2.8	203	Specific	366.89	242.37	242.37	5.77	33	>sp|P05556|ITB1_HUMAN Integrin beta-1 OS=Homo sapiens GN=ITGB1 PE=1 SV=2	8370	Caco2P7_diffgpep1.9972.9972.3	controllerType=0 controllerNumber=1 scan=9972	46.78
09495:3	28	K.LRNPC[+57.021]TSEQN[+2026.687]C[+57.021]TSPFSYK.N	HexNAc(2)Hex(10)Fuc(0)NeuAc(0)	C[+57]*2, N[+2027]	1405.56	3	4214.67	4215.66	-1	2.6	203	Specific	378.02	289.94	289.94	6.54	33	>sp|P05556|ITB1_HUMAN Integrin beta-1 OS=Homo sapiens GN=ITGB1 PE=1 SV=2	8370	Caco2P7_diffgpep1.9841.9841.3	controllerType=0 controllerNumber=1 scan=9841	46.1317
09476:3	28	K.LRNPC[+57.021]TSEQN[+1702.581]C[+57.021]TSPFSYK.N	HexNAc(2)Hex(8)Fuc(0)NeuAc(0)	C[+57]*2, N[+1703]	1297.86	3	3891.58	3891.56	0	5.3	203	Specific	406.81	315.28	315.28	6.43	33	>sp|P05556|ITB1_HUMAN Integrin beta-1 OS=Homo sapiens GN=ITGB1 PE=1 SV=2	8370	Caco2P7_diffgpep1.9825.9825.4	controllerType=0 controllerNumber=1 scan=9825	46.05
09461:3	28	K.LRNPC[+57.021]TSEQN[+1864.634]C[+57.021]TSPFSYK.N	HexNAc(2)Hex(9)Fuc(0)NeuAc(0)	C[+57]*2, N[+1865]	1351.88	3	4053.62	4053.61	0	1.7	203	Specific	439.53	349.2	349.2	7.22	33	>sp|P05556|ITB1_HUMAN Integrin beta-1 OS=Homo sapiens GN=ITGB1 PE=1 SV=2	8370	Caco2P7_diffgpep1.9812.9812.3	controllerType=0 controllerNumber=1 scan=9812	45.9832
09486:3	28	K.LRNPC[+57.021]TSEQN[+1864.634]C[+57.021]TSPFSYK.N	HexNAc(2)Hex(9)Fuc(0)NeuAc(0)	C[+57]*2, N[+1865]	1351.88	3	4053.61	4053.61	0	1.4	203	Specific	514.72	408.22	408.22	9.05	33	>sp|P05556|ITB1_HUMAN Integrin beta-1 OS=Homo sapiens GN=ITGB1 PE=1 SV=2	8370	Caco2P7_diffgpep1.9834.9834.3	controllerType=0 controllerNumber=1 scan=9834	46.0938
09508:3	28	K.LRNPC[+57.021]TSEQN[+1702.581]C[+57.021]TSPFSYK.N	HexNAc(2)Hex(8)Fuc(0)NeuAc(0)	C[+57]*2, N[+1703]	1297.86	3	3891.57	3891.56	0	4.1	203	Specific	515.62	442.12	442.12	8.89	33	>sp|P05556|ITB1_HUMAN Integrin beta-1 OS=Homo sapiens GN=ITGB1 PE=1 SV=2	8370	Caco2P7_diffgpep1.9853.9853.3	controllerType=0 controllerNumber=1 scan=9853	46.1886
00082:2	28	R.N[+1864.634]VTR.L	HexNAc(2)Hex(9)Fuc(0)NeuAc(0)	N[+1865]	1177.46	2	2353.92	2353.91	0	2.7	269	Specific	262.5	55.59	55.59	2.15	33	>sp|P05556|ITB1_HUMAN Integrin beta-1 OS=Homo sapiens GN=ITGB1 PE=1 SV=2	8370	Caco2P7_diffgpep1.1825.1825.2	controllerType=0 controllerNumber=1 scan=1825	8.1276
02082:3	28	K.C[+57.021]HEGN[+1378.476]GTFEC[+57.021]GAC[+57.021]R.C	HexNAc(2)Hex(6)Fuc(0)NeuAc(0)	C[+57]*3, N[+1378]	1011.7	3	3033.1	3033.09	0	1.3	477	Specific	324.82	311.53	311.53	6.56	33	>sp|P05556|ITB1_HUMAN Integrin beta-1 OS=Homo sapiens GN=ITGB1 PE=1 SV=2	8370	Caco2P7_diffgpep1.3601.3601.3	controllerType=0 controllerNumber=1 scan=3601	16.1064
01843:3	28	K.C[+57.021]HEGN[+1702.581]GTFEC[+57.021]GAC[+57.021]R.C	HexNAc(2)Hex(8)Fuc(0)NeuAc(0)	C[+57]*3, N[+1703]	1119.74	3	3357.2	3357.2	0	1.3	477	Specific	337.98	337.98	337.98	6.71	33	>sp|P05556|ITB1_HUMAN Integrin beta-1 OS=Homo sapiens GN=ITGB1 PE=1 SV=2	8370	Caco2P7_diffgpep1.3353.3353.3	controllerType=0 controllerNumber=1 scan=3353	15.0612
01930:3	28	K.C[+57.021]HEGN[+1702.581]GTFEC[+57.021]GAC[+57.021]R.C	HexNAc(2)Hex(8)Fuc(0)NeuAc(0)	C[+57]*3, N[+1703]	1119.74	3	3357.19	3357.2	0	-0.7	477	Specific	354.54	350	350	6.44	33	>sp|P05556|ITB1_HUMAN Integrin beta-1 OS=Homo sapiens GN=ITGB1 PE=1 SV=2	8370	Caco2P7_diffgpep1.3454.3454.3	controllerType=0 controllerNumber=1 scan=3454	15.4721
01822:3	28	K.C[+57.021]HEGN[+1864.634]GTFEC[+57.021]GAC[+57.021]R.C	HexNAc(2)Hex(9)Fuc(0)NeuAc(0)	C[+57]*3, N[+1865]	1173.76	3	3519.25	3519.25	0	0.9	477	Specific	546.77	546.77	546.77	9.13	33	>sp|P05556|ITB1_HUMAN Integrin beta-1 OS=Homo sapiens GN=ITGB1 PE=1 SV=2	8370	Caco2P7_diffgpep1.3332.3332.3	controllerType=0 controllerNumber=1 scan=3332	14.9746
07336:4	28	R.KEN[+1702.581]SSEIC[+57.021]SNNGEC[+57.021]VC[+57.021]GQC[+57.021]VC[+57.021]R.K	HexNAc(2)Hex(8)Fuc(0)NeuAc(0)	C[+57]*5, N[+1703]	1088.16	4	4349.61	4349.62	0	-2.1	518	Specific	168.88	136.56	136.56	2.32	33	>sp|P05556|ITB1_HUMAN Integrin beta-1 OS=Homo sapiens GN=ITGB1 PE=1 SV=2	8370	Caco2P7_diffgpep1.7962.7962.4	controllerType=0 controllerNumber=1 scan=7962	37.0187
06570:4	28	R.KEN[+1864.634]SSEIC[+57.021]SNNGEC[+57.021]VC[+57.021]GQC[+57.021]VC[+57.021]R.K	HexNAc(2)Hex(9)Fuc(0)NeuAc(0)	C[+57]*5, N[+1865]	1128.68	4	4511.7	4511.68	0	5.9	518	Specific	206.62	146.23	146.23	2.5	33	>sp|P05556|ITB1_HUMAN Integrin beta-1 OS=Homo sapiens GN=ITGB1 PE=1 SV=2	8370	Caco2P7_diffgpep1.7327.7327.4	controllerType=0 controllerNumber=1 scan=7327	33.8915
06587:3	28	R.KEN[+1864.634]SSEIC[+57.021]SNNGEC[+57.021]VC[+57.021]GQC[+57.021]VC[+57.021]R.K	HexNAc(2)Hex(9)Fuc(0)NeuAc(0)	C[+57]*5, N[+1865]	1504.24	3	4510.7	4511.68	-1	6.3	518	Specific	224.06	186.39	186.39	5.34	33	>sp|P05556|ITB1_HUMAN Integrin beta-1 OS=Homo sapiens GN=ITGB1 PE=1 SV=2	8370	Caco2P7_diffgpep1.7340.7340.3	controllerType=0 controllerNumber=1 scan=7340	33.9545
06648:3	28	R.KEN[+1702.581]SSEIC[+57.021]SNNGEC[+57.021]VC[+57.021]GQC[+57.021]VC[+57.021]R.K	HexNAc(2)Hex(8)Fuc(0)NeuAc(0)	C[+57]*5, N[+1703]	1450.55	3	4349.63	4349.62	0	1.1	518	Specific	228.19	154.57	154.57	5.65	33	>sp|P05556|ITB1_HUMAN Integrin beta-1 OS=Homo sapiens GN=ITGB1 PE=1 SV=2	8370	Caco2P7_diffgpep1.7391.7391.3	controllerType=0 controllerNumber=1 scan=7391	34.1996
06569:3	28	R.KEN[+1864.634]SSEIC[+57.021]SNNGEC[+57.021]VC[+57.021]GQC[+57.021]VC[+57.021]R.K	HexNAc(2)Hex(9)Fuc(0)NeuAc(0)	C[+57]*5, N[+1865]	1504.57	3	4511.69	4511.68	0	4.1	518	Specific	368.69	312.75	312.75	6.93	33	>sp|P05556|ITB1_HUMAN Integrin beta-1 OS=Homo sapiens GN=ITGB1 PE=1 SV=2	8370	Caco2P7_diffgpep1.7325.7325.3	controllerType=0 controllerNumber=1 scan=7325	33.8846
06582:4	28	R.KEN[+1702.581]SSEIC[+57.021]SNNGEC[+57.021]VC[+57.021]GQC[+57.021]VC[+57.021]R.K	HexNAc(2)Hex(8)Fuc(0)NeuAc(0)	C[+57]*5, N[+1703]	1088.16	4	4349.63	4349.62	0	1.5	518	Specific	377.68	288.51	288.51	6.82	33	>sp|P05556|ITB1_HUMAN Integrin beta-1 OS=Homo sapiens GN=ITGB1 PE=1 SV=2	8370	Caco2P7_diffgpep1.7337.7337.4	controllerType=0 controllerNumber=1 scan=7337	33.938
06720:3	28	R.KEN[+1378.476]SSEIC[+57.021]SNNGEC[+57.021]VC[+57.021]GQC[+57.021]VC[+57.021]R.K	HexNAc(2)Hex(6)Fuc(0)NeuAc(0)	C[+57]*5, N[+1378]	1342.52	3	4025.54	4025.52	0	5.5	518	Specific	394.53	279.43	279.43	6.35	33	>sp|P05556|ITB1_HUMAN Integrin beta-1 OS=Homo sapiens GN=ITGB1 PE=1 SV=2	8370	Caco2P7_diffgpep1.7453.7453.3	controllerType=0 controllerNumber=1 scan=7453	34.5078
06634:3	28	R.KEN[+1540.529]SSEIC[+57.021]SNNGEC[+57.021]VC[+57.021]GQC[+57.021]VC[+57.021]R.K	HexNAc(2)Hex(7)Fuc(0)NeuAc(0)	C[+57]*5, N[+1541]	1396.86	3	4188.58	4187.57	1	0.6	518	Specific	430.73	355.13	355.13	7.47	33	>sp|P05556|ITB1_HUMAN Integrin beta-1 OS=Homo sapiens GN=ITGB1 PE=1 SV=2	8370	Caco2P7_diffgpep1.7378.7378.3	controllerType=0 controllerNumber=1 scan=7378	34.1405
06597:3	28	R.KEN[+1702.581]SSEIC[+57.021]SNNGEC[+57.021]VC[+57.021]GQC[+57.021]VC[+57.021]R.K	HexNAc(2)Hex(8)Fuc(0)NeuAc(0)	C[+57]*5, N[+1703]	1450.55	3	4349.63	4349.62	0	2.5	518	Specific	691.38	606.67	606.67	12.98	33	>sp|P05556|ITB1_HUMAN Integrin beta-1 OS=Homo sapiens GN=ITGB1 PE=1 SV=2	8370	Caco2P7_diffgpep1.7349.7349.3	controllerType=0 controllerNumber=1 scan=7349	33.995
08358:3	28	K.EN[+1702.581]SSEIC[+57.021]SNNGEC[+57.021]VC[+57.021]GQC[+57.021]VC[+57.021]R.K	HexNAc(2)Hex(8)Fuc(0)NeuAc(0)	C[+57]*5, N[+1703]	1407.84	3	4221.5	4221.53	0	-6	519	Specific	637	552.16	552.16	10.84	33	>sp|P05556|ITB1_HUMAN Integrin beta-1 OS=Homo sapiens GN=ITGB1 PE=1 SV=2	8370	Caco2P7_diffgpep1.8868.8868.3	controllerType=0 controllerNumber=1 scan=8868	41.3741
07347:3	28	K.E[-18.011]N[+1850.693]SSEIC[+57.021]SNNGEC[+57.021]VC[+57.021]GQC[+57.021]VC[+57.021]R.K	HexNAc(6)Hex(3)Fuc(1)NeuAc(0)	C[+57]*5, E[-18], N[+1851]	1451.21	3	4351.61	4351.63	0	-4.1	519	Specific	264.55	91.19	91.19	4.25	33	>sp|P05556|ITB1_HUMAN Integrin beta-1 OS=Homo sapiens GN=ITGB1 PE=1 SV=2	8370	Caco2P7_diffgpep1.7971.7971.3	controllerType=0 controllerNumber=1 scan=7971	37.0632
09729:3	28	K.KDTC[+57.021]TQEC[+57.021]SYFN[+1702.581]ITK.V	HexNAc(2)Hex(8)Fuc(0)NeuAc(0)	C[+57]*2, N[+1703]	1199.81	3	3597.4	3597.41	0	-2.4	658	Specific	328.23	204.58	204.58	5.51	33	>sp|P05556|ITB1_HUMAN Integrin beta-1 OS=Homo sapiens GN=ITGB1 PE=1 SV=2	8370	Caco2P7_diffgpep1.10038.10038.3	controllerType=0 controllerNumber=1 scan=10038	47.0993
09882:3	28	K.KDTC[+57.021]TQEC[+57.021]SYFN[+1378.476]ITK.V	HexNAc(2)Hex(6)Fuc(0)NeuAc(0)	C[+57]*2, N[+1378]	1091.78	3	3273.31	3273.31	0	2	658	Specific	367.7	222.61	222.61	6.42	33	>sp|P05556|ITB1_HUMAN Integrin beta-1 OS=Homo sapiens GN=ITGB1 PE=1 SV=2	8370	Caco2P7_diffgpep1.10165.10165.3	controllerType=0 controllerNumber=1 scan=10165	47.7109
09837:3	28	K.KDTC[+57.021]TQEC[+57.021]SYFN[+1540.529]ITK.V	HexNAc(2)Hex(7)Fuc(0)NeuAc(0)	C[+57]*2, N[+1541]	1145.8	3	3435.38	3435.36	0	6	658	Specific	418.33	265.4	265.4	6.08	33	>sp|P05556|ITB1_HUMAN Integrin beta-1 OS=Homo sapiens GN=ITGB1 PE=1 SV=2	8370	Caco2P7_diffgpep1.10130.10130.3	controllerType=0 controllerNumber=1 scan=10130	47.5456
09713:3	28	K.KDTC[+57.021]TQEC[+57.021]SYFN[+1864.634]ITK.V	HexNAc(2)Hex(9)Fuc(0)NeuAc(0)	C[+57]*2, N[+1865]	1253.83	3	3759.48	3759.47	0	3.2	658	Specific	528.5	369.06	369.06	7.54	33	>sp|P05556|ITB1_HUMAN Integrin beta-1 OS=Homo sapiens GN=ITGB1 PE=1 SV=2	8370	Caco2P7_diffgpep1.10025.10025.3	controllerType=0 controllerNumber=1 scan=10025	47.0364
09773:3	28	K.KDTC[+57.021]TQEC[+57.021]SYFN[+1702.581]ITK.V	HexNAc(2)Hex(8)Fuc(0)NeuAc(0)	C[+57]*2, N[+1703]	1199.81	3	3597.42	3597.41	0	1.2	658	Specific	557.35	387.92	387.92	9.13	33	>sp|P05556|ITB1_HUMAN Integrin beta-1 OS=Homo sapiens GN=ITGB1 PE=1 SV=2	8370	Caco2P7_diffgpep1.10074.10074.3	controllerType=0 controllerNumber=1 scan=10074	47.2707
13391:3	28	K.DTC[+57.021]TQEC[+57.021]SYFN[+1378.476]ITK.V	HexNAc(2)Hex(6)Fuc(0)NeuAc(0)	C[+57]*2, N[+1378]	1049.08	3	3145.22	3145.21	0	2.7	659	Specific	516.86	345.69	345.69	7.02	33	>sp|P05556|ITB1_HUMAN Integrin beta-1 OS=Homo sapiens GN=ITGB1 PE=1 SV=2	8370	Caco2P7_diffgpep1.13187.13187.3	controllerType=0 controllerNumber=1 scan=13187	62.1586
12501:3	29	K.ANIQFGDN[+1864.634]GTTISAVSNK.A	HexNAc(2)Hex(9)Fuc(0)NeuAc(0)	N[+1865]	1234.52	3	3701.55	3701.54	0	3	98	Specific	540.67	453.63	453.63	9.39	25	>sp|Q14108|SCRB2_HUMAN Lysosome membrane protein 2 OS=Homo sapiens GN=SCARB2 PE=1 SV=2	15521	Caco2P7_diffgpep1.12467.12467.3	controllerType=0 controllerNumber=1 scan=12467	58.6478
12449:3	29	K.ANIQFGDN[+1864.634]GTTISAVSNK.A	HexNAc(2)Hex(9)Fuc(0)NeuAc(0)	N[+1865]	1234.52	3	3701.56	3701.54	0	3.4	98	Specific	556.87	454.89	454.89	9.36	25	>sp|Q14108|SCRB2_HUMAN Lysosome membrane protein 2 OS=Homo sapiens GN=SCARB2 PE=1 SV=2	15521	Caco2P7_diffgpep1.12424.12424.3	controllerType=0 controllerNumber=1 scan=12424	58.4374
23311:3	29	K.NGTNDGDYVFLTGEDSYLN[+2756.989]FTK.I	HexNAc(6)Hex(5)Fuc(1)NeuAc(2)	N[+2757]	1742.69	3	5226.07	5227.09	-1	-4.1	206	Specific	150.64	148.68	122.83	2.19	25	>sp|Q14108|SCRB2_HUMAN Lysosome membrane protein 2 OS=Homo sapiens GN=SCARB2 PE=1 SV=2	15521	Caco2P7_diffgpep1.21278.21278.3	controllerType=0 controllerNumber=1 scan=21278	100.839
23343:4	29	K.NGTNDGDYVFLTGEDSYLN[+2756.989]FTK.I	HexNAc(6)Hex(5)Fuc(1)NeuAc(2)	N[+2757]	1307.27	4	5226.07	5227.09	-1	-2.9	206	Specific	293.31	109.7	109.7	4.55	25	>sp|Q14108|SCRB2_HUMAN Lysosome membrane protein 2 OS=Homo sapiens GN=SCARB2 PE=1 SV=2	15521	Caco2P7_diffgpep1.21303.21303.4	controllerType=0 controllerNumber=1 scan=21303	100.952
23115:4	29	K.NGTNDGDYVFLTGEDSYLN[+3081.095]FTK.I	HexNAc(6)Hex(7)Fuc(1)NeuAc(2)	N[+3081]	1388.55	4	5551.16	5551.2	0	-7	206	Specific	377.99	326.85	139.22	5.77	25	>sp|Q14108|SCRB2_HUMAN Lysosome membrane protein 2 OS=Homo sapiens GN=SCARB2 PE=1 SV=2	15521	Caco2P7_diffgpep1.21113.21113.4	controllerType=0 controllerNumber=1 scan=21113	100.059
11011:4	29	K.C[+57.021]NMIN[+1702.581]GTDGDSFHPLITK.D	HexNAc(2)Hex(8)Fuc(0)NeuAc(0)	C[+57], N[+1703]	931.384	4	3722.52	3722.51	0	2.1	245	Specific	112.05	90.22	90.22	2.44	25	>sp|Q14108|SCRB2_HUMAN Lysosome membrane protein 2 OS=Homo sapiens GN=SCARB2 PE=1 SV=2	15521	Caco2P7_diffgpep1.11138.11138.4	controllerType=0 controllerNumber=1 scan=11138	52.4383
10961:4	29	K.C[+57.021]NMIN[+1702.581]GTDGDSFHPLITK.D	HexNAc(2)Hex(8)Fuc(0)NeuAc(0)	C[+57], N[+1703]	931.383	4	3722.51	3722.51	0	0.6	245	Specific	218.02	168.04	168.04	2.4	25	>sp|Q14108|SCRB2_HUMAN Lysosome membrane protein 2 OS=Homo sapiens GN=SCARB2 PE=1 SV=2	15521	Caco2P7_diffgpep1.11098.11098.4	controllerType=0 controllerNumber=1 scan=11098	52.256
13636:3	29	K.C[+57.021]NMIN[+1702.581]GTDGDSFHPLITK.D	HexNAc(2)Hex(8)Fuc(0)NeuAc(0)	C[+57], N[+1703]	1241.51	3	3722.51	3722.51	0	-0.4	245	Specific	224.11	170.61	170.61	5.52	25	>sp|Q14108|SCRB2_HUMAN Lysosome membrane protein 2 OS=Homo sapiens GN=SCARB2 PE=1 SV=2	15521	Caco2P7_diffgpep1.13384.13384.3	controllerType=0 controllerNumber=1 scan=13384	63.1494
15026:3	29	K.C[+57.021]NMIN[+1702.581]GTDGDSFHPLITK.D	HexNAc(2)Hex(8)Fuc(0)NeuAc(0)	C[+57], N[+1703]	1241.51	3	3722.51	3722.51	0	-0.7	245	Specific	269.11	159.27	159.27	5.93	25	>sp|Q14108|SCRB2_HUMAN Lysosome membrane protein 2 OS=Homo sapiens GN=SCARB2 PE=1 SV=2	15521	Caco2P7_diffgpep1.14534.14534.3	controllerType=0 controllerNumber=1 scan=14534	68.7911
13425:4	29	K.C[+57.021]NMIN[+1864.634]GTDGDSFHPLITK.D	HexNAc(2)Hex(9)Fuc(0)NeuAc(0)	C[+57], N[+1865]	971.896	4	3884.56	3884.56	0	0.7	245	Specific	274.43	185.28	185.28	6.19	25	>sp|Q14108|SCRB2_HUMAN Lysosome membrane protein 2 OS=Homo sapiens GN=SCARB2 PE=1 SV=2	15521	Caco2P7_diffgpep1.13212.13212.4	controllerType=0 controllerNumber=1 scan=13212	62.2871
13561:3	29	K.C[+57.021]NMIN[+1540.529]GTDGDSFHPLITK.D	HexNAc(2)Hex(7)Fuc(0)NeuAc(0)	C[+57], N[+1541]	1187.48	3	3560.44	3560.45	0	-5.5	245	Specific	387.54	300.04	300.04	6.1	25	>sp|Q14108|SCRB2_HUMAN Lysosome membrane protein 2 OS=Homo sapiens GN=SCARB2 PE=1 SV=2	15521	Caco2P7_diffgpep1.13322.13322.3	controllerType=0 controllerNumber=1 scan=13322	62.8374
13377:3	29	K.C[+57.021]NMIN[+2026.687]GTDGDSFHPLITK.D	HexNAc(2)Hex(10)Fuc(0)NeuAc(0)	C[+57], N[+2027]	1349.54	3	4046.62	4046.61	0	1.6	245	Specific	417.26	296.34	296.34	7.31	25	>sp|Q14108|SCRB2_HUMAN Lysosome membrane protein 2 OS=Homo sapiens GN=SCARB2 PE=1 SV=2	15521	Caco2P7_diffgpep1.13176.13176.3	controllerType=0 controllerNumber=1 scan=13176	62.1019
13390:3	29	K.C[+57.021]NMIN[+1864.634]GTDGDSFHPLITK.D	HexNAc(2)Hex(9)Fuc(0)NeuAc(0)	C[+57], N[+1865]	1295.53	3	3884.57	3884.56	0	2.6	245	Specific	681.16	535.67	535.67	13.05	25	>sp|Q14108|SCRB2_HUMAN Lysosome membrane protein 2 OS=Homo sapiens GN=SCARB2 PE=1 SV=2	15521	Caco2P7_diffgpep1.13186.13186.3	controllerType=0 controllerNumber=1 scan=13186	62.1527
13428:3	29	K.C[+57.021]NMIN[+1702.581]GTDGDSFHPLITK.D	HexNAc(2)Hex(8)Fuc(0)NeuAc(0)	C[+57], N[+1703]	1241.51	3	3722.51	3722.51	0	1.9	245	Specific	710.87	579.47	579.47	14.19	25	>sp|Q14108|SCRB2_HUMAN Lysosome membrane protein 2 OS=Homo sapiens GN=SCARB2 PE=1 SV=2	15521	Caco2P7_diffgpep1.13215.13215.3	controllerType=0 controllerNumber=1 scan=13215	62.2993
27296:4	29	K.C[+57.021]NMIN[+1702.581]GTDGDSFHPLITKDEVLYVFPSDFC[+57.021]R.S	HexNAc(2)Hex(8)Fuc(0)NeuAc(0)	C[+57]*2, N[+1703]	1338.32	4	5350.27	5350.24	0	4.4	245	Specific	158.95	158.95	158.95	2.54	25	>sp|Q14108|SCRB2_HUMAN Lysosome membrane protein 2 OS=Homo sapiens GN=SCARB2 PE=1 SV=2	15521	Caco2P7_diffgpep1.26136.26136.4	controllerType=0 controllerNumber=1 scan=26136	121.228
27297:4	29	K.C[+57.021]NMIN[+1702.581]GTDGDSFHPLITKDEVLYVFPSDFC[+57.021]R.S	HexNAc(2)Hex(8)Fuc(0)NeuAc(0)	C[+57]*2, N[+1703]	1338.07	4	5349.27	5350.24	-1	5.2	245	Specific	183.36	183.36	183.36	3.4	25	>sp|Q14108|SCRB2_HUMAN Lysosome membrane protein 2 OS=Homo sapiens GN=SCARB2 PE=1 SV=2	15521	Caco2P7_diffgpep1.26139.26139.4	controllerType=0 controllerNumber=1 scan=26139	121.24
25857:4	29	K.C[+57.021]NMIN[+1864.634]GTDGDSFHPLITKDEVLYVFPSDFC[+57.021]R.S	HexNAc(2)Hex(9)Fuc(0)NeuAc(0)	C[+57]*2, N[+1865]	1379.08	4	5513.3	5512.29	1	0	245	Specific	192.6	107.79	23.12	2.33	25	>sp|Q14108|SCRB2_HUMAN Lysosome membrane protein 2 OS=Homo sapiens GN=SCARB2 PE=1 SV=2	15521	Caco2P7_diffgpep1.24223.24223.4	controllerType=0 controllerNumber=1 scan=24223	113.367
25213:4	29	K.C[+57.021]NMIN[+1702.581]GTDGDSFHPLITKDEVLYVFPSDFC[+57.021]R.S	HexNAc(2)Hex(8)Fuc(0)NeuAc(0)	C[+57]*2, N[+1703]	1338.33	4	5350.28	5350.24	0	7.8	245	Specific	371.69	326.99	326.99	6.19	25	>sp|Q14108|SCRB2_HUMAN Lysosome membrane protein 2 OS=Homo sapiens GN=SCARB2 PE=1 SV=2	15521	Caco2P7_diffgpep1.23317.23317.2	controllerType=0 controllerNumber=1 scan=23317	109.59
26379:4	29	K.C[+57.021]NMIN[+1702.581]GTDGDSFHPLITKDEVLYVFPSDFC[+57.021]R.S	HexNAc(2)Hex(8)Fuc(0)NeuAc(0)	C[+57]*2, N[+1703]	1338.06	4	5349.23	5350.24	-1	-1.3	245	Specific	406	290.7	290.7	6.2	25	>sp|Q14108|SCRB2_HUMAN Lysosome membrane protein 2 OS=Homo sapiens GN=SCARB2 PE=1 SV=2	15521	Caco2P7_diffgpep1.24889.24889.4	controllerType=0 controllerNumber=1 scan=24889	116.103
25867:4	29	K.C[+57.021]NMIN[+1702.581]GTDGDSFHPLITKDEVLYVFPSDFC[+57.021]R.S	HexNAc(2)Hex(8)Fuc(0)NeuAc(0)	C[+57]*2, N[+1703]	1338.31	4	5350.23	5350.24	0	-1.9	245	Specific	417	343.64	343.64	6.47	25	>sp|Q14108|SCRB2_HUMAN Lysosome membrane protein 2 OS=Homo sapiens GN=SCARB2 PE=1 SV=2	15521	Caco2P7_diffgpep1.24240.24240.4	controllerType=0 controllerNumber=1 scan=24240	113.436
25097:4	29	K.C[+57.021]NMIN[+1702.581]GTDGDSFHPLITKDEVLYVFPSDFC[+57.021]R.S	HexNAc(2)Hex(8)Fuc(0)NeuAc(0)	C[+57]*2, N[+1703]	1338.32	4	5350.26	5350.24	0	3.2	245	Specific	526.8	345.39	345.39	7.47	25	>sp|Q14108|SCRB2_HUMAN Lysosome membrane protein 2 OS=Homo sapiens GN=SCARB2 PE=1 SV=2	15521	Caco2P7_diffgpep1.23153.23153.4	controllerType=0 controllerNumber=1 scan=23153	108.937
25878:4	29	K.C[+57.021]NMIN[+1702.581]GTDGDSFHPLITKDEVLYVFPSDFC[+57.021]R.S	HexNAc(2)Hex(8)Fuc(0)NeuAc(0)	C[+57]*2, N[+1703]	1338.57	4	5351.25	5350.24	1	1.1	245	Specific	554.67	375.12	375.12	7.84	25	>sp|Q14108|SCRB2_HUMAN Lysosome membrane protein 2 OS=Homo sapiens GN=SCARB2 PE=1 SV=2	15521	Caco2P7_diffgpep1.24256.24256.4	controllerType=0 controllerNumber=1 scan=24256	113.501
25121:4	29	K.C[+57.021]NMIN[+1864.634]GTDGDSFHPLITKDEVLYVFPSDFC[+57.021]R.S	HexNAc(2)Hex(9)Fuc(0)NeuAc(0)	C[+57]*2, N[+1865]	1378.83	4	5512.3	5512.29	0	1.4	245	Specific	632.82	478.94	478.94	11.77	25	>sp|Q14108|SCRB2_HUMAN Lysosome membrane protein 2 OS=Homo sapiens GN=SCARB2 PE=1 SV=2	15521	Caco2P7_diffgpep1.23183.23183.4	controllerType=0 controllerNumber=1 scan=23183	109.057
25110:4	29	K.C[+57.021]NMIN[+1702.581]GTDGDSFHPLITKDEVLYVFPSDFC[+57.021]R.S	HexNAc(2)Hex(8)Fuc(0)NeuAc(0)	C[+57]*2, N[+1703]	1338.32	4	5350.26	5350.24	0	3.1	245	Specific	720.26	581.67	581.67	13.64	25	>sp|Q14108|SCRB2_HUMAN Lysosome membrane protein 2 OS=Homo sapiens GN=SCARB2 PE=1 SV=2	15521	Caco2P7_diffgpep1.23171.23171.4	controllerType=0 controllerNumber=1 scan=23171	109.008
25111:4	29	K.C[+57.021]NMIN[+1864.634]GTDGDSFHPLITKDEVLYVFPSDFC[+57.021]R.S	HexNAc(2)Hex(9)Fuc(0)NeuAc(0)	C[+57]*2, N[+1865]	1378.59	4	5511.32	5512.29	-1	6.1	245	Specific	739.15	591.76	591.76	13.17	25	>sp|Q14108|SCRB2_HUMAN Lysosome membrane protein 2 OS=Homo sapiens GN=SCARB2 PE=1 SV=2	15521	Caco2P7_diffgpep1.23172.23172.4	controllerType=0 controllerNumber=1 scan=23172	109.014
22319:3	29	R.TMVFPVMYLN[+2026.687]ESVHIDK.E	HexNAc(2)Hex(10)Fuc(0)NeuAc(0)	N[+2027]	1350.24	3	4048.71	4049.69	-1	4.7	403	Specific	209.39	150.31	150.31	2.34	25	>sp|Q14108|SCRB2_HUMAN Lysosome membrane protein 2 OS=Homo sapiens GN=SCARB2 PE=1 SV=2	15521	Caco2P7_diffgpep1.20448.20448.3	controllerType=0 controllerNumber=1 scan=20448	97.0106
22261:3	29	R.TMVFPVMYLN[+1864.634]ESVHIDK.E	HexNAc(2)Hex(9)Fuc(0)NeuAc(0)	N[+1865]	1296.55	3	3887.64	3887.64	0	-0.3	403	Specific	292.05	186.05	186.05	6.18	25	>sp|Q14108|SCRB2_HUMAN Lysosome membrane protein 2 OS=Homo sapiens GN=SCARB2 PE=1 SV=2	15521	Caco2P7_diffgpep1.20404.20404.3	controllerType=0 controllerNumber=1 scan=20404	96.7994
22439:3	29	R.TMVFPVMYLN[+1864.634]ESVHIDK.E	HexNAc(2)Hex(9)Fuc(0)NeuAc(0)	N[+1865]	1296.55	3	3887.65	3887.64	0	2.3	403	Specific	710.14	639.14	639.14	14.05	25	>sp|Q14108|SCRB2_HUMAN Lysosome membrane protein 2 OS=Homo sapiens GN=SCARB2 PE=1 SV=2	15521	Caco2P7_diffgpep1.20535.20535.3	controllerType=0 controllerNumber=1 scan=20535	97.4296
20815:4	29	R.TMVFPVMYLN[+1864.634]ESVHIDKETASR.L	HexNAc(2)Hex(9)Fuc(0)NeuAc(0)	N[+1865]	1108.73	4	4431.88	4431.9	0	-3.3	403	Specific	223.96	144.51	144.51	2.86	25	>sp|Q14108|SCRB2_HUMAN Lysosome membrane protein 2 OS=Homo sapiens GN=SCARB2 PE=1 SV=2	15521	Caco2P7_diffgpep1.19118.19118.4	controllerType=0 controllerNumber=1 scan=19118	91.04
20799:4	29	R.TMVFPVMYLN[+1864.634]ESVHIDKETASR.L	HexNAc(2)Hex(9)Fuc(0)NeuAc(0)	N[+1865]	1108.72	4	4431.87	4431.9	0	-5.1	403	Specific	283.65	197.02	197.02	5.01	25	>sp|Q14108|SCRB2_HUMAN Lysosome membrane protein 2 OS=Homo sapiens GN=SCARB2 PE=1 SV=2	15521	Caco2P7_diffgpep1.19105.19105.4	controllerType=0 controllerNumber=1 scan=19105	90.981
20236:4	29	R.TMVFPVMYLN[+2188.740]ESVHIDKETASR.L	HexNAc(2)Hex(11)Fuc(0)NeuAc(0)	N[+2189]	1190.01	4	4757.02	4756	1	2.4	403	Specific	360.55	206.54	11.81	6.2	25	>sp|Q14108|SCRB2_HUMAN Lysosome membrane protein 2 OS=Homo sapiens GN=SCARB2 PE=1 SV=2	15521	Caco2P7_diffgpep1.18657.18657.4	controllerType=0 controllerNumber=1 scan=18657	88.7776
20417:3	29	R.TMVFPVMYLN[+1864.634]ESVHIDKETASR.L	HexNAc(2)Hex(9)Fuc(0)NeuAc(0)	N[+1865]	1477.98	3	4431.91	4431.9	0	4	403	Specific	365.12	163.93	163.93	5.11	25	>sp|Q14108|SCRB2_HUMAN Lysosome membrane protein 2 OS=Homo sapiens GN=SCARB2 PE=1 SV=2	15521	Caco2P7_diffgpep1.18797.18797.3	controllerType=0 controllerNumber=1 scan=18797	89.472
20256:4	29	R.TMVFPVMYLN[+2026.687]ESVHIDKETASR.L	HexNAc(2)Hex(10)Fuc(0)NeuAc(0)	N[+2027]	1149.25	4	4593.98	4593.95	0	6.6	403	Specific	582.17	407.81	407.81	10.01	25	>sp|Q14108|SCRB2_HUMAN Lysosome membrane protein 2 OS=Homo sapiens GN=SCARB2 PE=1 SV=2	15521	Caco2P7_diffgpep1.18671.18671.4	controllerType=0 controllerNumber=1 scan=18671	88.8457
20555:4	29	R.TMVFPVMYLN[+1864.634]ESVHIDKETASR.L	HexNAc(2)Hex(9)Fuc(0)NeuAc(0)	N[+1865]	1108.73	4	4431.91	4431.9	0	3.2	403	Specific	661.01	511.21	511.21	12.53	25	>sp|Q14108|SCRB2_HUMAN Lysosome membrane protein 2 OS=Homo sapiens GN=SCARB2 PE=1 SV=2	15521	Caco2P7_diffgpep1.18905.18905.4	controllerType=0 controllerNumber=1 scan=18905	90.003
20374:3	29	R.TMVFPVMYLN[+1864.634]ESVHIDKETASR.L	HexNAc(2)Hex(9)Fuc(0)NeuAc(0)	N[+1865]	1477.98	3	4431.91	4431.9	0	3.7	403	Specific	669.52	470.65	470.65	11.63	25	>sp|Q14108|SCRB2_HUMAN Lysosome membrane protein 2 OS=Homo sapiens GN=SCARB2 PE=1 SV=2	15521	Caco2P7_diffgpep1.18763.18763.3	controllerType=0 controllerNumber=1 scan=18763	89.2993
20396:4	29	R.TMVFPVMYLN[+1702.581]ESVHIDKETASR.L	HexNAc(2)Hex(8)Fuc(0)NeuAc(0)	N[+1703]	1068.22	4	4269.85	4269.84	0	0.6	403	Specific	684.95	495.79	495.79	12.55	25	>sp|Q14108|SCRB2_HUMAN Lysosome membrane protein 2 OS=Homo sapiens GN=SCARB2 PE=1 SV=2	15521	Caco2P7_diffgpep1.18782.18782.4	controllerType=0 controllerNumber=1 scan=18782	89.3941
20298:4	29	R.TMVFPVMYLN[+2026.687]ESVHIDKETASR.L	HexNAc(2)Hex(10)Fuc(0)NeuAc(0)	N[+2027]	1149.25	4	4593.96	4593.95	0	3.2	403	Specific	697.89	556.43	556.43	12.53	25	>sp|Q14108|SCRB2_HUMAN Lysosome membrane protein 2 OS=Homo sapiens GN=SCARB2 PE=1 SV=2	15521	Caco2P7_diffgpep1.18703.18703.4	controllerType=0 controllerNumber=1 scan=18703	89.0032
20322:4	29	R.TMVFPVMYLN[+1864.634]ESVHIDKETASR.L	HexNAc(2)Hex(9)Fuc(0)NeuAc(0)	N[+1865]	1108.73	4	4431.91	4431.9	0	2.3	403	Specific	872.74	581.44	581.44	16.53	25	>sp|Q14108|SCRB2_HUMAN Lysosome membrane protein 2 OS=Homo sapiens GN=SCARB2 PE=1 SV=2	15521	Caco2P7_diffgpep1.18721.18721.4	controllerType=0 controllerNumber=1 scan=18721	89.093
14464:4	30	R.SLLEFN[+2262.814]TTVSC[+57.021]DQQGTNHR.V	HexNAc(5)Hex(5)Fuc(1)NeuAc(1)	C[+57], N[+2263]	1118.21	4	4469.83	4469.83	0	0.6	107	Specific	188.06	103.05	30.59	2.64	34	>sp|P11717|MPRI_HUMAN Cation-independent mannose-6-phosphate receptor OS=Homo sapiens GN=IGF2R PE=1 SV=3	10573	Caco2P7_diffgpep1.14053.14053.4	controllerType=0 controllerNumber=1 scan=14053	66.4239
12736:3	30	R.SLLEFN[+1647.613]TTVSC[+57.021]DQQGTNHR.V	HexNAc(5)Hex(3)Fuc(1)NeuAc(0)	C[+57], N[+1648]	1285.55	3	3854.63	3854.63	0	1.1	107	Specific	241.26	161.73	161.73	5.96	34	>sp|P11717|MPRI_HUMAN Cation-independent mannose-6-phosphate receptor OS=Homo sapiens GN=IGF2R PE=1 SV=3	10573	Caco2P7_diffgpep1.12657.12657.3	controllerType=0 controllerNumber=1 scan=12657	59.5718
12445:3	30	R.SLLEFN[+1864.634]TTVSC[+57.021]DQQGTNHR.V	HexNAc(2)Hex(9)Fuc(0)NeuAc(0)	C[+57], N[+1865]	1357.55	3	4070.65	4071.65	-1	1.2	107	Specific	358.28	262.47	262.47	6.87	34	>sp|P11717|MPRI_HUMAN Cation-independent mannose-6-phosphate receptor OS=Homo sapiens GN=IGF2R PE=1 SV=3	10573	Caco2P7_diffgpep1.12422.12422.3	controllerType=0 controllerNumber=1 scan=12422	58.4266
[truncated: 1,501 more rows]

## Sheet: DifCaco2_gpep
Query #:z	Protein Rank	Peptide < ProteinMetrics Confidential >	Glycans.NHFAGNa	Modification.Types	Observed m/z	z	Observed (M+H)	Calc. mass (M+H)	Off-by-x error	Mass error (ppm)	Starting position	Cleavage	Score	Delta	Delta.Mod	X.Log.Prob.	# of unique peptides	Protein.Name	Protein DB number	Comment	Scan #	Scan Time
[truncated: 1,630 more rows]

[truncated: 1 more sheets: DifCaco2_gpro]
