# Supplementary material for: A proximity labeling method for protein–protein interactions on cell membrane
Source: Chem Sci. 2022 Apr 30;13(20):6028–38. doi: 10.1039/d1sc06898a (PMC9132088; doi:10.1039/d1sc06898a)
Supplement: SC-013-D1SC06898A-s006 [file SC-013-D1SC06898A-s006.xlsx]

## Sheet: UndCaco2_filtspec
Query #:z	Protein Rank	Peptide < ProteinMetrics Confidential >	Glycans.NHFAGNa	Modification.Types	Observed m/z	z	Observed (M+H)	Calc. mass (M+H)	Off-by-x error	Mass error (ppm)	Starting position	Cleavage	Score	Delta	Delta.Mod	X.Log.Prob.	# of unique peptides	Protein.Name	Protein DB number	Comment	Scan #	Scan Time
12129:4	2	K.LRNPC[+57.021]TSEQN[+1864.634]C[+57.021]TSPFSYK.N	HexNAc(2)Hex(9)Fuc(0)NeuAc(0)	C[+57]*2, N[+1865]	1013.91	4	4052.63	4053.61	-1	6.7	203	Specific	120.1	88.36	88.36	2.45	73	>sp|P05556|ITB1_HUMAN Integrin beta-1 OS=Homo sapiens GN=ITGB1 PE=1 SV=2	8370	cacoP7gpep1.11258.11258.4	controllerType=0 controllerNumber=1 scan=11258	36.2908
14661:3	2	K.LRNPC[+57.021]TSEQN[+1872.651]C[+57.021]TSPFSYK.N	HexNAc(3)Hex(6)Fuc(0)NeuAc(1)	C[+57]*2, N[+1873]	1354.55	3	4061.62	4061.63	0	-0.4	203	Specific	120.52	31.19	31.19	2.51	73	>sp|P05556|ITB1_HUMAN Integrin beta-1 OS=Homo sapiens GN=ITGB1 PE=1 SV=2	8370	cacoP7gpep1.13206.13206.3	controllerType=0 controllerNumber=1 scan=13206	45.2828
12435:3	2	K.LRNPC[+57.021]TSEQN[+1216.423]C[+57.021]TSPFSYK.N	HexNAc(2)Hex(5)Fuc(0)NeuAc(0)	C[+57]*2, N[+1216]	1135.8	3	3405.39	3405.4	0	-1.3	203	Specific	167.83	108.12	108.12	3.39	73	>sp|P05556|ITB1_HUMAN Integrin beta-1 OS=Homo sapiens GN=ITGB1 PE=1 SV=2	8370	cacoP7gpep1.11485.11485.3	controllerType=0 controllerNumber=1 scan=11485	37.1799
12020:4	2	K.LRNPC[+57.021]TSEQN[+2028.740]C[+57.021]TSPFSYK.N	HexNAc(6)Hex(5)Fuc(0)NeuAc(0)	C[+57]*2, N[+2029]	1054.93	4	4216.7	4217.72	-1	-2.6	203	Specific	238.2	131.99	12.33	5.27	73	>sp|P05556|ITB1_HUMAN Integrin beta-1 OS=Homo sapiens GN=ITGB1 PE=1 SV=2	8370	cacoP7gpep1.11171.11171.4	controllerType=0 controllerNumber=1 scan=11171	35.9206
12464:4	2	K.LRNPC[+57.021]TSEQN[+2117.777]C[+57.021]TSPFSYK.N	HexNAc(5)Hex(5)Fuc(2)NeuAc(0)	C[+57]*2, N[+2118]	1077.44	4	4306.75	4306.75	0	0.7	203	Specific	244.04	171.64	21.1	6.09	73	>sp|P05556|ITB1_HUMAN Integrin beta-1 OS=Homo sapiens GN=ITGB1 PE=1 SV=2	8370	cacoP7gpep1.11507.11507.4	controllerType=0 controllerNumber=1 scan=11507	37.264
11987:4	2	K.LRNPC[+57.021]TSEQN[+1702.581]C[+57.021]TSPFSYK.N	HexNAc(2)Hex(8)Fuc(0)NeuAc(0)	C[+57]*2, N[+1703]	973.647	4	3891.57	3891.56	0	2.9	203	Specific	251.68	122.81	122.81	5.13	73	>sp|P05556|ITB1_HUMAN Integrin beta-1 OS=Homo sapiens GN=ITGB1 PE=1 SV=2	8370	cacoP7gpep1.11148.11148.4	controllerType=0 controllerNumber=1 scan=11148	35.8136
08711:4	2	K.LRNPC[+57.021]TSEQN[+1702.581]C[+57.021]TSPFSYK.N	HexNAc(2)Hex(8)Fuc(0)NeuAc(0)	C[+57]*2, N[+1703]	973.645	4	3891.56	3891.56	0	0.3	203	Specific	263.29	174.92	174.92	6.07	73	>sp|P05556|ITB1_HUMAN Integrin beta-1 OS=Homo sapiens GN=ITGB1 PE=1 SV=2	8370	cacoP7gpep1.8524.8524.4	controllerType=0 controllerNumber=1 scan=8524	27.2767
12393:4	2	K.LRNPC[+57.021]TSEQN[+2336.851]C[+57.021]TSPFSYK.N	HexNAc(6)Hex(6)Fuc(1)NeuAc(0)	C[+57]*2, N[+2337]	1131.96	4	4524.84	4525.83	-1	3.3	203	Specific	286.13	227.5	227.5	6.37	73	>sp|P05556|ITB1_HUMAN Integrin beta-1 OS=Homo sapiens GN=ITGB1 PE=1 SV=2	8370	cacoP7gpep1.11452.11452.4	controllerType=0 controllerNumber=1 scan=11452	37.0543
14666:4	2	K.LRNPC[+57.021]TSEQN[+2627.947]C[+57.021]TSPFSYK.N	HexNAc(6)Hex(6)Fuc(1)NeuAc(1)	C[+57]*2, N[+2628]	1204.99	4	4816.95	4816.92	0	4.9	203	Specific	286.85	149.04	18.18	6.06	73	>sp|P05556|ITB1_HUMAN Integrin beta-1 OS=Homo sapiens GN=ITGB1 PE=1 SV=2	8370	cacoP7gpep1.13210.13210.4	controllerType=0 controllerNumber=1 scan=13210	45.3006
12415:4	2	K.LRNPC[+57.021]TSEQN[+2336.851]C[+57.021]TSPFSYK.N	HexNAc(6)Hex(6)Fuc(1)NeuAc(0)	C[+57]*2, N[+2337]	1132.21	4	4525.84	4525.83	0	2	203	Specific	295.9	198.02	198.02	6.3	73	>sp|P05556|ITB1_HUMAN Integrin beta-1 OS=Homo sapiens GN=ITGB1 PE=1 SV=2	8370	cacoP7gpep1.11469.11469.4	controllerType=0 controllerNumber=1 scan=11469	37.1157
12436:3	2	K.LRNPC[+57.021]TSEQN[+1825.661]C[+57.021]TSPFSYK.N	HexNAc(5)Hex(5)Fuc(0)NeuAc(0)	C[+57]*2, N[+1826]	1338.88	3	4014.63	4014.64	0	-0.6	203	Specific	297.13	180.17	180.17	6.3	73	>sp|P05556|ITB1_HUMAN Integrin beta-1 OS=Homo sapiens GN=ITGB1 PE=1 SV=2	8370	cacoP7gpep1.11486.11486.3	controllerType=0 controllerNumber=1 scan=11486	37.1828
12333:4	2	K.LRNPC[+57.021]TSEQN[+2482.909]C[+57.021]TSPFSYK.N	HexNAc(6)Hex(6)Fuc(2)NeuAc(0)	C[+57]*2, N[+2483]	1168.73	4	4671.88	4671.88	0	-0.4	203	Specific	306.4	205.86	19.16	6.11	73	>sp|P05556|ITB1_HUMAN Integrin beta-1 OS=Homo sapiens GN=ITGB1 PE=1 SV=2	8370	cacoP7gpep1.11407.11407.2	controllerType=0 controllerNumber=1 scan=11407	36.8713
12361:3	2	K.LRNPC[+57.021]TSEQN[+1784.634]C[+57.021]TSPFSYK.N	HexNAc(4)Hex(6)Fuc(0)NeuAc(0)	C[+57]*2, N[+1785]	1325.21	3	3973.62	3973.61	0	3.1	203	Specific	357.85	266.48	266.48	6.92	73	>sp|P05556|ITB1_HUMAN Integrin beta-1 OS=Homo sapiens GN=ITGB1 PE=1 SV=2	8370	cacoP7gpep1.11426.11426.3	controllerType=0 controllerNumber=1 scan=11426	36.9474
12389:3	2	K.LRNPC[+57.021]TSEQN[+1825.661]C[+57.021]TSPFSYK.N	HexNAc(5)Hex(5)Fuc(0)NeuAc(0)	C[+57]*2, N[+1826]	1338.89	3	4014.65	4014.64	0	2.7	203	Specific	381.34	239.88	239.88	6.86	73	>sp|P05556|ITB1_HUMAN Integrin beta-1 OS=Homo sapiens GN=ITGB1 PE=1 SV=2	8370	cacoP7gpep1.11449.11449.3	controllerType=0 controllerNumber=1 scan=11449	37.0383
12145:4	2	K.LRNPC[+57.021]TSEQN[+1540.529]C[+57.021]TSPFSYK.N	HexNAc(2)Hex(7)Fuc(0)NeuAc(0)	C[+57]*2, N[+1541]	933.132	4	3729.51	3729.5	0	0.7	203	Specific	402.64	289.94	289.94	6.61	73	>sp|P05556|ITB1_HUMAN Integrin beta-1 OS=Homo sapiens GN=ITGB1 PE=1 SV=2	8370	cacoP7gpep1.11271.11271.4	controllerType=0 controllerNumber=1 scan=11271	36.3437
11967:3	2	K.LRNPC[+57.021]TSEQN[+2026.687]C[+57.021]TSPFSYK.N	HexNAc(2)Hex(10)Fuc(0)NeuAc(0)	C[+57]*2, N[+2027]	1405.9	3	4215.68	4215.66	0	4.1	203	Specific	440.06	357.65	357.65	7.44	73	>sp|P05556|ITB1_HUMAN Integrin beta-1 OS=Homo sapiens GN=ITGB1 PE=1 SV=2	8370	cacoP7gpep1.11134.11134.3	controllerType=0 controllerNumber=1 scan=11134	35.7593
12037:4	2	K.LRNPC[+57.021]TSEQN[+1864.634]C[+57.021]TSPFSYK.N	HexNAc(2)Hex(9)Fuc(0)NeuAc(0)	C[+57]*2, N[+1865]	1014.16	4	4053.63	4053.61	0	4.6	203	Specific	443.61	288.6	288.6	6.89	73	>sp|P05556|ITB1_HUMAN Integrin beta-1 OS=Homo sapiens GN=ITGB1 PE=1 SV=2	8370	cacoP7gpep1.11185.11185.4	controllerType=0 controllerNumber=1 scan=11185	35.9843
12005:4	2	K.LRNPC[+57.021]TSEQN[+1702.581]C[+57.021]TSPFSYK.N	HexNAc(2)Hex(8)Fuc(0)NeuAc(0)	C[+57]*2, N[+1703]	973.646	4	3891.56	3891.56	0	1.9	203	Specific	449.06	273.38	273.38	6.87	73	>sp|P05556|ITB1_HUMAN Integrin beta-1 OS=Homo sapiens GN=ITGB1 PE=1 SV=2	8370	cacoP7gpep1.11160.11160.4	controllerType=0 controllerNumber=1 scan=11160	35.8665
12392:3	2	K.LRNPC[+57.021]TSEQN[+1971.719]C[+57.021]TSPFSYK.N	HexNAc(5)Hex(5)Fuc(1)NeuAc(0)	C[+57]*2, N[+1972]	1387.57	3	4160.7	4160.69	0	1.8	203	Specific	453.54	366.31	366.31	7.63	73	>sp|P05556|ITB1_HUMAN Integrin beta-1 OS=Homo sapiens GN=ITGB1 PE=1 SV=2	8370	cacoP7gpep1.11451.11451.3	controllerType=0 controllerNumber=1 scan=11451	37.0491
11961:3	2	K.LRNPC[+57.021]TSEQN[+1702.581]C[+57.021]TSPFSYK.N	HexNAc(2)Hex(8)Fuc(0)NeuAc(0)	C[+57]*2, N[+1703]	1297.86	3	3891.55	3891.56	0	-0.4	203	Specific	497.56	403.29	403.29	8.8	73	>sp|P05556|ITB1_HUMAN Integrin beta-1 OS=Homo sapiens GN=ITGB1 PE=1 SV=2	8370	cacoP7gpep1.11130.11130.3	controllerType=0 controllerNumber=1 scan=11130	35.7409
12365:3	2	K.LRNPC[+57.021]TSEQN[+1216.423]C[+57.021]TSPFSYK.N	HexNAc(2)Hex(5)Fuc(0)NeuAc(0)	C[+57]*2, N[+1216]	1135.81	3	3405.41	3405.4	0	3	203	Specific	500.15	409.97	409.97	9.17	73	>sp|P05556|ITB1_HUMAN Integrin beta-1 OS=Homo sapiens GN=ITGB1 PE=1 SV=2	8370	cacoP7gpep1.11430.11430.3	controllerType=0 controllerNumber=1 scan=11430	36.9618
12204:3	2	K.LRNPC[+57.021]TSEQN[+1378.476]C[+57.021]TSPFSYK.N	HexNAc(2)Hex(6)Fuc(0)NeuAc(0)	C[+57]*2, N[+1378]	1189.82	3	3567.45	3567.45	0	-1.2	203	Specific	534.12	435.54	435.54	8.75	73	>sp|P05556|ITB1_HUMAN Integrin beta-1 OS=Homo sapiens GN=ITGB1 PE=1 SV=2	8370	cacoP7gpep1.11314.11314.3	controllerType=0 controllerNumber=1 scan=11314	36.5099
12427:3	2	K.LRNPC[+57.021]TSEQN[+1971.719]C[+57.021]TSPFSYK.N	HexNAc(5)Hex(5)Fuc(1)NeuAc(0)	C[+57]*2, N[+1972]	1387.58	3	4160.71	4160.69	0	4.6	203	Specific	534.16	445.04	445.04	9.19	73	>sp|P05556|ITB1_HUMAN Integrin beta-1 OS=Homo sapiens GN=ITGB1 PE=1 SV=2	8370	cacoP7gpep1.11480.11480.3	controllerType=0 controllerNumber=1 scan=11480	37.1619
12053:3	2	K.LRNPC[+57.021]TSEQN[+1540.529]C[+57.021]TSPFSYK.N	HexNAc(2)Hex(7)Fuc(0)NeuAc(0)	C[+57]*2, N[+1541]	1243.85	3	3729.53	3729.5	0	7.2	203	Specific	549.27	419.29	419.29	9.17	73	>sp|P05556|ITB1_HUMAN Integrin beta-1 OS=Homo sapiens GN=ITGB1 PE=1 SV=2	8370	cacoP7gpep1.11197.11197.3	controllerType=0 controllerNumber=1 scan=11197	36.0276
12038:4	2	K.LRNPC[+57.021]TSEQN[+1702.581]C[+57.021]TSPFSYK.N	HexNAc(2)Hex(8)Fuc(0)NeuAc(0)	C[+57]*2, N[+1703]	973.648	4	3891.57	3891.56	0	3.9	203	Specific	553.13	492.8	492.8	9.03	73	>sp|P05556|ITB1_HUMAN Integrin beta-1 OS=Homo sapiens GN=ITGB1 PE=1 SV=2	8370	cacoP7gpep1.11186.11186.4	controllerType=0 controllerNumber=1 scan=11186	35.9866
12073:3	2	K.LRNPC[+57.021]TSEQN[+1540.529]C[+57.021]TSPFSYK.N	HexNAc(2)Hex(7)Fuc(0)NeuAc(0)	C[+57]*2, N[+1541]	1243.84	3	3729.51	3729.5	0	2.8	203	Specific	562.45	473.4	473.4	9.5	73	>sp|P05556|ITB1_HUMAN Integrin beta-1 OS=Homo sapiens GN=ITGB1 PE=1 SV=2	8370	cacoP7gpep1.11211.11211.3	controllerType=0 controllerNumber=1 scan=11211	36.0862
12160:3	2	K.LRNPC[+57.021]TSEQN[+1702.581]C[+57.021]TSPFSYK.N	HexNAc(2)Hex(8)Fuc(0)NeuAc(0)	C[+57]*2, N[+1703]	1297.86	3	3891.58	3891.56	0	6	203	Specific	571.66	494.25	494.25	9.36	73	>sp|P05556|ITB1_HUMAN Integrin beta-1 OS=Homo sapiens GN=ITGB1 PE=1 SV=2	8370	cacoP7gpep1.11284.11284.3	controllerType=0 controllerNumber=1 scan=11284	36.3955
11996:3	2	K.LRNPC[+57.021]TSEQN[+1864.634]C[+57.021]TSPFSYK.N	HexNAc(2)Hex(9)Fuc(0)NeuAc(0)	C[+57]*2, N[+1865]	1351.88	3	4053.63	4053.61	0	6.1	203	Specific	602.84	547.56	547.56	11.62	73	>sp|P05556|ITB1_HUMAN Integrin beta-1 OS=Homo sapiens GN=ITGB1 PE=1 SV=2	8370	cacoP7gpep1.11154.11154.3	controllerType=0 controllerNumber=1 scan=11154	35.8367
12270:3	2	K.LRNPC[+57.021]TSEQN[+1378.476]C[+57.021]TSPFSYK.N	HexNAc(2)Hex(6)Fuc(0)NeuAc(0)	C[+57]*2, N[+1378]	1189.82	3	3567.46	3567.45	0	2	203	Specific	614.12	491.54	491.54	11.68	73	>sp|P05556|ITB1_HUMAN Integrin beta-1 OS=Homo sapiens GN=ITGB1 PE=1 SV=2	8370	cacoP7gpep1.11363.11363.3	controllerType=0 controllerNumber=1 scan=11363	36.7035
12631:4	2	R.NPC[+57.021]TSEQN[+1971.719]C[+57.021]TSPFSYK.N	HexNAc(5)Hex(5)Fuc(1)NeuAc(0)	C[+57]*2, N[+1972]	973.633	4	3891.51	3891.51	0	0.8	205	Specific	254.42	171.6	171.6	5.66	73	>sp|P05556|ITB1_HUMAN Integrin beta-1 OS=Homo sapiens GN=ITGB1 PE=1 SV=2	8370	cacoP7gpep1.11635.11635.4	controllerType=0 controllerNumber=1 scan=11635	37.8112
12391:3	2	R.NPC[+57.021]TSEQN[+1540.529]C[+57.021]TSPFSYK.N	HexNAc(2)Hex(7)Fuc(0)NeuAc(0)	C[+57]*2, N[+1541]	1154.12	3	3460.33	3460.32	0	3.8	205	Specific	266.4	185.36	185.36	6.14	73	>sp|P05556|ITB1_HUMAN Integrin beta-1 OS=Homo sapiens GN=ITGB1 PE=1 SV=2	8370	cacoP7gpep1.11450.11450.3	controllerType=0 controllerNumber=1 scan=11450	37.0437
12523:3	2	R.NPC[+57.021]TSEQN[+1784.634]C[+57.021]TSPFSYK.N	HexNAc(4)Hex(6)Fuc(0)NeuAc(0)	C[+57]*2, N[+1785]	1235.48	3	3704.44	3704.42	0	4.4	205	Specific	285.57	140.6	140.6	6.05	73	>sp|P05556|ITB1_HUMAN Integrin beta-1 OS=Homo sapiens GN=ITGB1 PE=1 SV=2	8370	cacoP7gpep1.11548.11548.3	controllerType=0 controllerNumber=1 scan=11548	37.4407
12623:3	2	R.NPC[+57.021]TSEQN[+2336.851]C[+57.021]TSPFSYK.N	HexNAc(6)Hex(6)Fuc(1)NeuAc(0)	C[+57]*2, N[+2337]	1419.22	3	4255.64	4256.64	-1	0.6	205	Specific	349.05	213.98	213.98	6.53	73	>sp|P05556|ITB1_HUMAN Integrin beta-1 OS=Homo sapiens GN=ITGB1 PE=1 SV=2	8370	cacoP7gpep1.11627.11627.3	controllerType=0 controllerNumber=1 scan=11627	37.7833
12386:3	2	R.NPC[+57.021]TSEQN[+2116.756]C[+57.021]TSPFSYK.N	HexNAc(5)Hex(5)Fuc(0)NeuAc(1)	C[+57]*2, N[+2117]	1346.53	3	4037.57	4036.55	1	3.9	205	Specific	360.72	177.4	28.49	6.4	73	>sp|P05556|ITB1_HUMAN Integrin beta-1 OS=Homo sapiens GN=ITGB1 PE=1 SV=2	8370	cacoP7gpep1.11447.11447.3	controllerType=0 controllerNumber=1 scan=11447	37.0274
15340:3	2	R.NPC[+57.021]TSEQN[+2262.814]C[+57.021]TSPFSYK.N	HexNAc(5)Hex(5)Fuc(1)NeuAc(1)	C[+57]*2, N[+2263]	1394.87	3	4182.6	4182.6	0	-0.8	205	Specific	366.65	260.42	40.49	6.35	73	>sp|P05556|ITB1_HUMAN Integrin beta-1 OS=Homo sapiens GN=ITGB1 PE=1 SV=2	8370	cacoP7gpep1.13741.13741.3	controllerType=0 controllerNumber=1 scan=13741	47.9276
15354:3	2	R.NPC[+57.021]TSEQN[+2262.814]C[+57.021]TSPFSYK.N	HexNAc(5)Hex(5)Fuc(1)NeuAc(1)	C[+57]*2, N[+2263]	1395.21	3	4183.63	4182.6	1	5.2	205	Specific	384.86	302.43	20.44	6.76	73	>sp|P05556|ITB1_HUMAN Integrin beta-1 OS=Homo sapiens GN=ITGB1 PE=1 SV=2	8370	cacoP7gpep1.13752.13752.3	controllerType=0 controllerNumber=1 scan=13752	47.9832
12597:3	2	R.NPC[+57.021]TSEQN[+2336.851]C[+57.021]TSPFSYK.N	HexNAc(6)Hex(6)Fuc(1)NeuAc(0)	C[+57]*2, N[+2337]	1419.89	3	4257.66	4256.64	1	4.6	205	Specific	412	326.22	326.22	6.85	73	>sp|P05556|ITB1_HUMAN Integrin beta-1 OS=Homo sapiens GN=ITGB1 PE=1 SV=2	8370	cacoP7gpep1.11605.11605.3	controllerType=0 controllerNumber=1 scan=11605	37.6871
12466:3	2	R.NPC[+57.021]TSEQN[+1216.423]C[+57.021]TSPFSYK.N	HexNAc(2)Hex(5)Fuc(0)NeuAc(0)	C[+57]*2, N[+1216]	1046.08	3	3136.22	3136.21	0	1.6	205	Specific	498.15	356.19	356.19	7.34	73	>sp|P05556|ITB1_HUMAN Integrin beta-1 OS=Homo sapiens GN=ITGB1 PE=1 SV=2	8370	cacoP7gpep1.11509.11509.3	controllerType=0 controllerNumber=1 scan=11509	37.273
12607:3	2	R.NPC[+57.021]TSEQN[+2117.777]C[+57.021]TSPFSYK.N	HexNAc(5)Hex(5)Fuc(2)NeuAc(0)	C[+57]*2, N[+2118]	1346.86	3	4038.57	4037.57	1	-0.1	205	Specific	512.88	370.29	370.29	7.28	73	>sp|P05556|ITB1_HUMAN Integrin beta-1 OS=Homo sapiens GN=ITGB1 PE=1 SV=2	8370	cacoP7gpep1.11613.11613.3	controllerType=0 controllerNumber=1 scan=11613	37.7209
12579:3	2	R.NPC[+57.021]TSEQN[+1971.719]C[+57.021]TSPFSYK.N	HexNAc(5)Hex(5)Fuc(1)NeuAc(0)	C[+57]*2, N[+1972]	1297.85	3	3891.54	3891.51	0	7.6	205	Specific	548.48	198.37	198.37	6.98	73	>sp|P05556|ITB1_HUMAN Integrin beta-1 OS=Homo sapiens GN=ITGB1 PE=1 SV=2	8370	cacoP7gpep1.11590.11590.3	controllerType=0 controllerNumber=1 scan=11590	37.6229
12675:3	2	R.NPC[+57.021]TSEQN[+1971.719]C[+57.021]TSPFSYK.N	HexNAc(5)Hex(5)Fuc(1)NeuAc(0)	C[+57]*2, N[+1972]	1297.85	3	3891.53	3891.51	0	6.1	205	Specific	578.27	197.86	197.86	7.17	73	>sp|P05556|ITB1_HUMAN Integrin beta-1 OS=Homo sapiens GN=ITGB1 PE=1 SV=2	8370	cacoP7gpep1.11672.11672.3	controllerType=0 controllerNumber=1 scan=11672	37.9549
12600:3	2	R.NPC[+57.021]TSEQN[+1971.719]C[+57.021]TSPFSYK.N	HexNAc(5)Hex(5)Fuc(1)NeuAc(0)	C[+57]*2, N[+1972]	1297.84	3	3891.52	3891.51	0	2.3	205	Specific	617.63	267.86	267.86	9.7	73	>sp|P05556|ITB1_HUMAN Integrin beta-1 OS=Homo sapiens GN=ITGB1 PE=1 SV=2	8370	cacoP7gpep1.11608.11608.3	controllerType=0 controllerNumber=1 scan=11608	37.6971
12043:3	2	R.NPC[+57.021]TSEQN[+2026.687]C[+57.021]TSPFSYK.N	HexNAc(2)Hex(10)Fuc(0)NeuAc(0)	C[+57]*2, N[+2027]	1316.17	3	3946.51	3946.48	0	8.3	205	Specific	675.95	569.39	569.39	11.91	73	>sp|P05556|ITB1_HUMAN Integrin beta-1 OS=Homo sapiens GN=ITGB1 PE=1 SV=2	8370	cacoP7gpep1.11190.11190.3	controllerType=0 controllerNumber=1 scan=11190	36.0005
12327:3	2	R.NPC[+57.021]TSEQN[+1378.476]C[+57.021]TSPFSYK.N	HexNAc(2)Hex(6)Fuc(0)NeuAc(0)	C[+57]*2, N[+1378]	1100.1	3	3298.28	3298.27	0	3.7	205	Specific	726	612.93	612.93	13.39	73	>sp|P05556|ITB1_HUMAN Integrin beta-1 OS=Homo sapiens GN=ITGB1 PE=1 SV=2	8370	cacoP7gpep1.11403.11403.3	controllerType=0 controllerNumber=1 scan=11403	36.8563
12039:3	2	R.NPC[+57.021]TSEQN[+1864.634]C[+57.021]TSPFSYK.N	HexNAc(2)Hex(9)Fuc(0)NeuAc(0)	C[+57]*2, N[+1865]	1262.15	3	3784.44	3784.42	0	5	205	Specific	834.68	777.19	777.19	15.41	73	>sp|P05556|ITB1_HUMAN Integrin beta-1 OS=Homo sapiens GN=ITGB1 PE=1 SV=2	8370	cacoP7gpep1.11187.11187.3	controllerType=0 controllerNumber=1 scan=11187	35.9901
12058:3	2	R.NPC[+57.021]TSEQN[+1702.581]C[+57.021]TSPFSYK.N	HexNAc(2)Hex(8)Fuc(0)NeuAc(0)	C[+57]*2, N[+1703]	1208.13	3	3622.39	3622.37	0	5.3	205	Specific	855.43	802.08	802.08	16.36	73	>sp|P05556|ITB1_HUMAN Integrin beta-1 OS=Homo sapiens GN=ITGB1 PE=1 SV=2	8370	cacoP7gpep1.11201.11201.3	controllerType=0 controllerNumber=1 scan=11201	36.0388
12141:3	2	R.NPC[+57.021]TSEQN[+1540.529]C[+57.021]TSPFSYK.N	HexNAc(2)Hex(7)Fuc(0)NeuAc(0)	C[+57]*2, N[+1541]	1154.12	3	3460.34	3460.32	0	5.4	205	Specific	860.05	736.34	736.34	16.36	73	>sp|P05556|ITB1_HUMAN Integrin beta-1 OS=Homo sapiens GN=ITGB1 PE=1 SV=2	8370	cacoP7gpep1.11268.11268.3	controllerType=0 controllerNumber=1 scan=11268	36.3321
00513:2	2	R.N[+1825.661]VTR.L	HexNAc(5)Hex(5)Fuc(0)NeuAc(0)	N[+1826]	1157.98	2	2314.95	2314.94	0	4.1	269	Specific	259.34	40.13	40.13	2.93	73	>sp|P05556|ITB1_HUMAN Integrin beta-1 OS=Homo sapiens GN=ITGB1 PE=1 SV=2	8370	cacoP7gpep1.2238.2238.2	controllerType=0 controllerNumber=1 scan=2238	9.2076
00437:2	2	R.N[+1540.529]VTR.L	HexNAc(2)Hex(7)Fuc(0)NeuAc(0)	N[+1541]	1015.41	2	2029.81	2029.81	0	3.5	269	Specific	285.97	61.06	61.06	3.41	73	>sp|P05556|ITB1_HUMAN Integrin beta-1 OS=Homo sapiens GN=ITGB1 PE=1 SV=2	8370	cacoP7gpep1.2172.2172.2	controllerType=0 controllerNumber=1 scan=2172	8.9117
00423:2	2	R.N[+1864.634]VTR.L	HexNAc(2)Hex(9)Fuc(0)NeuAc(0)	N[+1865]	1177.46	2	2353.92	2353.91	0	3.1	269	Specific	329.69	68.99	68.99	4.14	73	>sp|P05556|ITB1_HUMAN Integrin beta-1 OS=Homo sapiens GN=ITGB1 PE=1 SV=2	8370	cacoP7gpep1.2160.2160.2	controllerType=0 controllerNumber=1 scan=2160	8.8567
00424:2	2	R.N[+1702.581]VTR.L	HexNAc(2)Hex(8)Fuc(0)NeuAc(0)	N[+1703]	1096.44	2	2191.87	2191.86	0	3	269	Specific	330.09	67.29	67.29	4.14	73	>sp|P05556|ITB1_HUMAN Integrin beta-1 OS=Homo sapiens GN=ITGB1 PE=1 SV=2	8370	cacoP7gpep1.2161.2161.2	controllerType=0 controllerNumber=1 scan=2161	8.859
02688:3	2	K.C[+57.021]HEGN[+1540.529]GTFEC[+57.021]GAC[+57.021]R.C	HexNAc(2)Hex(7)Fuc(0)NeuAc(0)	C[+57]*3, N[+1541]	1065.73	3	3195.17	3195.14	0	8.1	477	Specific	552.28	469.01	469.01	8.64	73	>sp|P05556|ITB1_HUMAN Integrin beta-1 OS=Homo sapiens GN=ITGB1 PE=1 SV=2	8370	cacoP7gpep1.3997.3997.3	controllerType=0 controllerNumber=1 scan=3997	14.9827
02568:3	2	K.C[+57.021]HEGN[+1864.634]GTFEC[+57.021]GAC[+57.021]R.C	HexNAc(2)Hex(9)Fuc(0)NeuAc(0)	C[+57]*3, N[+1865]	1173.75	3	3519.25	3519.25	0	-0.8	477	Specific	628.99	628.99	628.99	10.9	73	>sp|P05556|ITB1_HUMAN Integrin beta-1 OS=Homo sapiens GN=ITGB1 PE=1 SV=2	8370	cacoP7gpep1.3901.3901.3	controllerType=0 controllerNumber=1 scan=3901	14.694
02578:3	2	K.C[+57.021]HEGN[+1864.634]GTFEC[+57.021]GAC[+57.021]R.C	HexNAc(2)Hex(9)Fuc(0)NeuAc(0)	C[+57]*3, N[+1865]	1173.76	3	3519.26	3519.25	0	3.1	477	Specific	680.83	680.83	680.83	12.23	73	>sp|P05556|ITB1_HUMAN Integrin beta-1 OS=Homo sapiens GN=ITGB1 PE=1 SV=2	8370	cacoP7gpep1.3909.3909.3	controllerType=0 controllerNumber=1 scan=3909	14.7244
02586:3	2	K.C[+57.021]HEGN[+1702.581]GTFEC[+57.021]GAC[+57.021]R.C	HexNAc(2)Hex(8)Fuc(0)NeuAc(0)	C[+57]*3, N[+1703]	1119.74	3	3357.2	3357.2	0	1.8	477	Specific	706.86	706.86	706.86	13.15	73	>sp|P05556|ITB1_HUMAN Integrin beta-1 OS=Homo sapiens GN=ITGB1 PE=1 SV=2	8370	cacoP7gpep1.3917.3917.3	controllerType=0 controllerNumber=1 scan=3917	14.7551
08209:4	2	R.KEN[+1864.634]SSEIC[+57.021]SNNGEC[+57.021]VC[+57.021]GQC[+57.021]VC[+57.021]R.K	HexNAc(2)Hex(9)Fuc(0)NeuAc(0)	C[+57]*5, N[+1865]	1128.93	4	4512.72	4511.68	1	8.2	518	Specific	116.92	81.5	81.5	3.02	73	>sp|P05556|ITB1_HUMAN Integrin beta-1 OS=Homo sapiens GN=ITGB1 PE=1 SV=2	8370	cacoP7gpep1.8151.8151.4	controllerType=0 controllerNumber=1 scan=8151	26.1603
08270:4	2	R.KEN[+1702.581]SSEIC[+57.021]SNNGEC[+57.021]VC[+57.021]GQC[+57.021]VC[+57.021]R.K	HexNAc(2)Hex(8)Fuc(0)NeuAc(0)	C[+57]*5, N[+1703]	1088.41	4	4350.64	4349.62	1	1.9	518	Specific	226.25	152.61	152.61	5.2	73	>sp|P05556|ITB1_HUMAN Integrin beta-1 OS=Homo sapiens GN=ITGB1 PE=1 SV=2	8370	cacoP7gpep1.8198.8198.4	controllerType=0 controllerNumber=1 scan=8198	26.3095
08175:4	2	R.KEN[+1702.581]SSEIC[+57.021]SNNGEC[+57.021]VC[+57.021]GQC[+57.021]VC[+57.021]R.K	HexNAc(2)Hex(8)Fuc(0)NeuAc(0)	C[+57]*5, N[+1703]	1088.17	4	4349.65	4349.62	0	6.6	518	Specific	351.34	279.15	279.15	6.65	73	>sp|P05556|ITB1_HUMAN Integrin beta-1 OS=Homo sapiens GN=ITGB1 PE=1 SV=2	8370	cacoP7gpep1.8123.8123.4	controllerType=0 controllerNumber=1 scan=8123	26.0878
08220:4	2	R.KEN[+1702.581]SSEIC[+57.021]SNNGEC[+57.021]VC[+57.021]GQC[+57.021]VC[+57.021]R.K	HexNAc(2)Hex(8)Fuc(0)NeuAc(0)	C[+57]*5, N[+1703]	1087.91	4	4348.62	4349.62	-1	1	518	Specific	406.14	363.33	363.33	7.47	73	>sp|P05556|ITB1_HUMAN Integrin beta-1 OS=Homo sapiens GN=ITGB1 PE=1 SV=2	8370	cacoP7gpep1.8161.8161.4	controllerType=0 controllerNumber=1 scan=8161	26.1875
08316:3	2	R.KEN[+1702.581]SSEIC[+57.021]SNNGEC[+57.021]VC[+57.021]GQC[+57.021]VC[+57.021]R.K	HexNAc(2)Hex(8)Fuc(0)NeuAc(0)	C[+57]*5, N[+1703]	1450.89	3	4350.65	4349.62	1	6.4	518	Specific	410.23	193.21	193.21	6.83	73	>sp|P05556|ITB1_HUMAN Integrin beta-1 OS=Homo sapiens GN=ITGB1 PE=1 SV=2	8370	cacoP7gpep1.8230.8230.3	controllerType=0 controllerNumber=1 scan=8230	26.4101
08213:3	2	R.KEN[+1864.634]SSEIC[+57.021]SNNGEC[+57.021]VC[+57.021]GQC[+57.021]VC[+57.021]R.K	HexNAc(2)Hex(9)Fuc(0)NeuAc(0)	C[+57]*5, N[+1865]	1504.91	3	4512.71	4511.68	1	6.5	518	Specific	475.54	220.65	220.65	7.05	73	>sp|P05556|ITB1_HUMAN Integrin beta-1 OS=Homo sapiens GN=ITGB1 PE=1 SV=2	8370	cacoP7gpep1.8154.8154.3	controllerType=0 controllerNumber=1 scan=8154	26.1675
08190:3	2	R.KEN[+1864.634]SSEIC[+57.021]SNNGEC[+57.021]VC[+57.021]GQC[+57.021]VC[+57.021]R.K	HexNAc(2)Hex(9)Fuc(0)NeuAc(0)	C[+57]*5, N[+1865]	1504.56	3	4511.67	4511.68	0	-1.8	518	Specific	578.08	527.86	527.86	9.24	73	>sp|P05556|ITB1_HUMAN Integrin beta-1 OS=Homo sapiens GN=ITGB1 PE=1 SV=2	8370	cacoP7gpep1.8136.8136.3	controllerType=0 controllerNumber=1 scan=8136	26.1221
08297:3	2	R.KEN[+1540.529]SSEIC[+57.021]SNNGEC[+57.021]VC[+57.021]GQC[+57.021]VC[+57.021]R.K	HexNAc(2)Hex(7)Fuc(0)NeuAc(0)	C[+57]*5, N[+1541]	1396.53	3	4187.57	4187.57	0	-0.6	518	Specific	584.34	509.2	509.2	10.7	73	>sp|P05556|ITB1_HUMAN Integrin beta-1 OS=Homo sapiens GN=ITGB1 PE=1 SV=2	8370	cacoP7gpep1.8216.8216.3	controllerType=0 controllerNumber=1 scan=8216	26.3651
09767:3	2	R.KEN[+1702.581]SSEIC[+57.021]SNNGEC[+57.021]VC[+57.021]GQC[+57.021]VC[+57.021]R.K	HexNAc(2)Hex(8)Fuc(0)NeuAc(0)	C[+57]*5, N[+1703]	1450.89	3	4350.64	4349.62	1	3.9	518	Specific	648.89	315.98	315.98	10.28	73	>sp|P05556|ITB1_HUMAN Integrin beta-1 OS=Homo sapiens GN=ITGB1 PE=1 SV=2	8370	cacoP7gpep1.9344.9344.3	controllerType=0 controllerNumber=1 scan=9344	29.6414
08375:3	2	R.KEN[+1378.476]SSEIC[+57.021]SNNGEC[+57.021]VC[+57.021]GQC[+57.021]VC[+57.021]R.K	HexNAc(2)Hex(6)Fuc(0)NeuAc(0)	C[+57]*5, N[+1378]	1342.52	3	4025.56	4025.52	0	9.3	518	Specific	661.85	552.02	552.02	12.25	73	>sp|P05556|ITB1_HUMAN Integrin beta-1 OS=Homo sapiens GN=ITGB1 PE=1 SV=2	8370	cacoP7gpep1.8276.8276.3	controllerType=0 controllerNumber=1 scan=8276	26.5668
08164:3	2	R.KEN[+1702.581]SSEIC[+57.021]SNNGEC[+57.021]VC[+57.021]GQC[+57.021]VC[+57.021]R.K	HexNAc(2)Hex(8)Fuc(0)NeuAc(0)	C[+57]*5, N[+1703]	1450.56	3	4349.66	4349.62	0	7.8	518	Specific	675.23	609.12	609.12	12.81	73	>sp|P05556|ITB1_HUMAN Integrin beta-1 OS=Homo sapiens GN=ITGB1 PE=1 SV=2	8370	cacoP7gpep1.8114.8114.3	controllerType=0 controllerNumber=1 scan=8114	26.0577
08384:3	2	R.KEN[+1378.476]SSEIC[+57.021]SNNGEC[+57.021]VC[+57.021]GQC[+57.021]VC[+57.021]R.K	HexNAc(2)Hex(6)Fuc(0)NeuAc(0)	C[+57]*5, N[+1378]	1342.52	3	4025.54	4025.52	0	5	518	Specific	717.49	607.69	607.69	13.94	73	>sp|P05556|ITB1_HUMAN Integrin beta-1 OS=Homo sapiens GN=ITGB1 PE=1 SV=2	8370	cacoP7gpep1.8283.8283.3	controllerType=0 controllerNumber=1 scan=8283	26.5898
11499:4	2	K.EN[+1702.581]SSEIC[+57.021]SNNGEC[+57.021]VC[+57.021]GQC[+57.021]VC[+57.021]R.K	HexNAc(2)Hex(8)Fuc(0)NeuAc(0)	C[+57]*5, N[+1703]	1056.38	4	4222.52	4221.53	1	-3.9	519	Specific	212.54	163.35	163.35	3.22	73	>sp|P05556|ITB1_HUMAN Integrin beta-1 OS=Homo sapiens GN=ITGB1 PE=1 SV=2	8370	cacoP7gpep1.10784.10784.4	controllerType=0 controllerNumber=1 scan=10784	34.4385
11631:3	2	K.EN[+1540.529]SSEIC[+57.021]SNNGEC[+57.021]VC[+57.021]GQC[+57.021]VC[+57.021]R.K	HexNAc(2)Hex(7)Fuc(0)NeuAc(0)	C[+57]*5, N[+1541]	1354.17	3	4060.5	4059.48	1	5.9	519	Specific	472.37	337.72	337.72	7.32	73	>sp|P05556|ITB1_HUMAN Integrin beta-1 OS=Homo sapiens GN=ITGB1 PE=1 SV=2	8370	cacoP7gpep1.10882.10882.3	controllerType=0 controllerNumber=1 scan=10882	34.7863
11707:3	2	K.EN[+1378.476]SSEIC[+57.021]SNNGEC[+57.021]VC[+57.021]GQC[+57.021]VC[+57.021]R.K	HexNAc(2)Hex(6)Fuc(0)NeuAc(0)	C[+57]*5, N[+1378]	1299.82	3	3897.43	3897.42	0	1.9	519	Specific	513.83	389.37	389.37	9.12	73	>sp|P05556|ITB1_HUMAN Integrin beta-1 OS=Homo sapiens GN=ITGB1 PE=1 SV=2	8370	cacoP7gpep1.10935.10935.3	controllerType=0 controllerNumber=1 scan=10935	34.984
11713:3	2	K.EN[+1378.476]SSEIC[+57.021]SNNGEC[+57.021]VC[+57.021]GQC[+57.021]VC[+57.021]R.K	HexNAc(2)Hex(6)Fuc(0)NeuAc(0)	C[+57]*5, N[+1378]	1299.82	3	3897.44	3897.42	0	5.3	519	Specific	621.2	432.54	432.54	11.65	73	>sp|P05556|ITB1_HUMAN Integrin beta-1 OS=Homo sapiens GN=ITGB1 PE=1 SV=2	8370	cacoP7gpep1.10941.10941.3	controllerType=0 controllerNumber=1 scan=10941	35.0056
12794:3	2	K.EN[+1702.581]SSEIC[+57.021]SNNGEC[+57.021]VC[+57.021]GQC[+57.021]VC[+57.021]R.K	HexNAc(2)Hex(8)Fuc(0)NeuAc(0)	C[+57]*5, N[+1703]	1408.18	3	4222.53	4221.53	1	-0.1	519	Specific	745.91	609.25	609.25	13.46	73	>sp|P05556|ITB1_HUMAN Integrin beta-1 OS=Homo sapiens GN=ITGB1 PE=1 SV=2	8370	cacoP7gpep1.11761.11761.3	controllerType=0 controllerNumber=1 scan=11761	38.3492
11436:3	2	K.EN[+1864.634]SSEIC[+57.021]SNNGEC[+57.021]VC[+57.021]GQC[+57.021]VC[+57.021]R.K	HexNAc(2)Hex(9)Fuc(0)NeuAc(0)	C[+57]*5, N[+1865]	1462.2	3	4384.59	4383.58	1	1.1	519	Specific	764.95	601.94	601.94	14.64	73	>sp|P05556|ITB1_HUMAN Integrin beta-1 OS=Homo sapiens GN=ITGB1 PE=1 SV=2	8370	cacoP7gpep1.10733.10733.3	controllerType=0 controllerNumber=1 scan=10733	34.2484
11470:3	2	K.EN[+1702.581]SSEIC[+57.021]SNNGEC[+57.021]VC[+57.021]GQC[+57.021]VC[+57.021]R.K	HexNAc(2)Hex(8)Fuc(0)NeuAc(0)	C[+57]*5, N[+1703]	1407.84	3	4221.52	4221.53	0	-2.5	519	Specific	992.67	830.05	830.05	18.04	73	>sp|P05556|ITB1_HUMAN Integrin beta-1 OS=Homo sapiens GN=ITGB1 PE=1 SV=2	8370	cacoP7gpep1.10761.10761.3	controllerType=0 controllerNumber=1 scan=10761	34.3529
18283:4	2	K.KDTC[+57.021]TQEC[+57.021]SYFN[+3065.100]ITK.V	HexNAc(6)Hex(6)Fuc(2)NeuAc(2)	C[+57]*2, N[+3065]	1240.49	4	4958.94	4959.93	-1	3.2	658	Specific	225.49	123.63	34.85	5.37	73	>sp|P05556|ITB1_HUMAN Integrin beta-1 OS=Homo sapiens GN=ITGB1 PE=1 SV=2	8370	cacoP7gpep1.15994.15994.4	controllerType=0 controllerNumber=1 scan=15994	59.1816
15174:3	2	K.KDTC[+57.021]TQEC[+57.021]SYFN[+2059.735]ITK.V	HexNAc(4)Hex(5)Fuc(1)NeuAc(1)	C[+57]*2, N[+2060]	1318.87	3	3954.59	3954.57	0	6.9	658	Specific	232.54	116.05	116.05	5.1	73	>sp|P05556|ITB1_HUMAN Integrin beta-1 OS=Homo sapiens GN=ITGB1 PE=1 SV=2	8370	cacoP7gpep1.13607.13607.3	controllerType=0 controllerNumber=1 scan=13607	47.2636
15204:3	2	K.KDTC[+57.021]TQEC[+57.021]SYFN[+2262.814]ITK.V	HexNAc(5)Hex(5)Fuc(1)NeuAc(1)	C[+57]*2, N[+2263]	1386.55	3	4157.65	4157.65	0	0.2	658	Specific	272.72	102.89	54.27	5.16	73	>sp|P05556|ITB1_HUMAN Integrin beta-1 OS=Homo sapiens GN=ITGB1 PE=1 SV=2	8370	cacoP7gpep1.13629.13629.3	controllerType=0 controllerNumber=1 scan=13629	47.3736
12293:3	2	K.KDTC[+57.021]TQEC[+57.021]SYFN[+1540.529]ITK.V	HexNAc(2)Hex(7)Fuc(0)NeuAc(0)	C[+57]*2, N[+1541]	1145.8	3	3435.38	3435.36	0	5.7	658	Specific	575.33	413.72	413.72	8.83	73	>sp|P05556|ITB1_HUMAN Integrin beta-1 OS=Homo sapiens GN=ITGB1 PE=1 SV=2	8370	cacoP7gpep1.11378.11378.3	controllerType=0 controllerNumber=1 scan=11378	36.7646
12200:3	2	K.KDTC[+57.021]TQEC[+57.021]SYFN[+1702.581]ITK.V	HexNAc(2)Hex(8)Fuc(0)NeuAc(0)	C[+57]*2, N[+1703]	1199.81	3	3597.42	3597.41	0	3.3	658	Specific	601.56	429.14	429.14	11.12	73	>sp|P05556|ITB1_HUMAN Integrin beta-1 OS=Homo sapiens GN=ITGB1 PE=1 SV=2	8370	cacoP7gpep1.11312.11312.3	controllerType=0 controllerNumber=1 scan=11312	36.504
12177:3	2	K.KDTC[+57.021]TQEC[+57.021]SYFN[+1702.581]ITK.V	HexNAc(2)Hex(8)Fuc(0)NeuAc(0)	C[+57]*2, N[+1703]	1199.81	3	3597.43	3597.41	0	4.1	658	Specific	620.1	441.91	441.91	11.12	73	>sp|P05556|ITB1_HUMAN Integrin beta-1 OS=Homo sapiens GN=ITGB1 PE=1 SV=2	8370	cacoP7gpep1.11295.11295.3	controllerType=0 controllerNumber=1 scan=11295	36.4393
12147:3	2	K.KDTC[+57.021]TQEC[+57.021]SYFN[+1864.634]ITK.V	HexNAc(2)Hex(9)Fuc(0)NeuAc(0)	C[+57]*2, N[+1865]	1253.83	3	3759.48	3759.47	0	3.7	658	Specific	624.12	445.34	445.34	11.12	73	>sp|P05556|ITB1_HUMAN Integrin beta-1 OS=Homo sapiens GN=ITGB1 PE=1 SV=2	8370	cacoP7gpep1.11273.11273.3	controllerType=0 controllerNumber=1 scan=11273	36.3517
12426:3	2	K.KDTC[+57.021]TQEC[+57.021]SYFN[+1378.476]ITK.V	HexNAc(2)Hex(6)Fuc(0)NeuAc(0)	C[+57]*2, N[+1378]	1091.78	3	3273.32	3273.31	0	3.7	658	Specific	733.5	574.67	574.67	13.12	73	>sp|P05556|ITB1_HUMAN Integrin beta-1 OS=Homo sapiens GN=ITGB1 PE=1 SV=2	8370	cacoP7gpep1.11479.11479.3	controllerType=0 controllerNumber=1 scan=11479	37.1583
16991:3	2	K.DTC[+57.021]TQEC[+57.021]SYFN[+1378.476]ITK.V	HexNAc(2)Hex(6)Fuc(0)NeuAc(0)	C[+57]*2, N[+1378]	1049.08	3	3145.22	3145.21	0	1.4	659	Specific	591.96	448.64	448.64	9.91	73	>sp|P05556|ITB1_HUMAN Integrin beta-1 OS=Homo sapiens GN=ITGB1 PE=1 SV=2	8370	cacoP7gpep1.14990.14990.3	controllerType=0 controllerNumber=1 scan=14990	54.1657
16858:3	2	K.DTC[+57.021]TQEC[+57.021]SYFN[+1540.529]ITK.V	HexNAc(2)Hex(7)Fuc(0)NeuAc(0)	C[+57]*2, N[+1541]	1103.1	3	3307.27	3307.26	0	2.5	659	Specific	696.9	554.01	554.01	11.99	73	>sp|P05556|ITB1_HUMAN Integrin beta-1 OS=Homo sapiens GN=ITGB1 PE=1 SV=2	8370	cacoP7gpep1.14890.14890.3	controllerType=0 controllerNumber=1 scan=14890	53.6669
16748:3	2	K.DTC[+57.021]TQEC[+57.021]SYFN[+1864.634]ITK.V	HexNAc(2)Hex(9)Fuc(0)NeuAc(0)	C[+57]*2, N[+1865]	1211.13	3	3631.38	3631.37	0	3	659	Specific	822.14	699.81	699.81	14.99	73	>sp|P05556|ITB1_HUMAN Integrin beta-1 OS=Homo sapiens GN=ITGB1 PE=1 SV=2	8370	cacoP7gpep1.14805.14805.3	controllerType=0 controllerNumber=1 scan=14805	53.2418
16795:3	2	K.DTC[+57.021]TQEC[+57.021]SYFN[+1702.581]ITK.V	HexNAc(2)Hex(8)Fuc(0)NeuAc(0)	C[+57]*2, N[+1703]	1157.11	3	3469.33	3469.32	0	3.2	659	Specific	945.64	791.68	791.68	16.99	73	>sp|P05556|ITB1_HUMAN Integrin beta-1 OS=Homo sapiens GN=ITGB1 PE=1 SV=2	8370	cacoP7gpep1.14845.14845.3	controllerType=0 controllerNumber=1 scan=14845	53.4414
21947:4	3	R.SSC[+57.021]GKEN[+3066.120]TSDPSLVIAFGR.G	HexNAc(6)Hex(6)Fuc(4)NeuAc(1)	C[+57], N[+3066]	1273.29	4	5090.13	5091.09	-1	8.1	78	Specific	76.1	76.1	76.1	2.14	106	>sp|P11279|LAMP1_HUMAN Lysosome-associated membrane glycoprotein 1 OS=Homo sapiens GN=LAMP1 PE=1 SV=3	9237	cacoP7gpep1.19555.19555.4	controllerType=0 controllerNumber=1 scan=19555	75.2868
21789:4	3	R.SSC[+57.021]GKEN[+3081.095]TSDPSLVIAFGR.G	HexNAc(6)Hex(7)Fuc(1)NeuAc(2)	C[+57], N[+3081]	1277.02	4	5105.08	5106.07	-1	2.9	78	Specific	97.61	97.61	97.61	3.71	106	>sp|P11279|LAMP1_HUMAN Lysosome-associated membrane glycoprotein 1 OS=Homo sapiens GN=LAMP1 PE=1 SV=3	9237	cacoP7gpep1.19348.19348.4	controllerType=0 controllerNumber=1 scan=19348	74.4134
18686:4	3	R.SSC[+57.021]GKEN[+2627.947]TSDPSLVIAFGR.G	HexNAc(6)Hex(6)Fuc(1)NeuAc(1)	C[+57], N[+2628]	1163.99	4	4652.92	4652.92	0	0.9	78	Specific	131.01	75.55	30.03	3	106	>sp|P11279|LAMP1_HUMAN Lysosome-associated membrane glycoprotein 1 OS=Homo sapiens GN=LAMP1 PE=1 SV=3	9237	cacoP7gpep1.16303.16303.4	controllerType=0 controllerNumber=1 scan=16303	60.7302
18616:4	3	R.SSC[+57.021]GKEN[+2408.872]TSDPSLVIAFGR.G	HexNAc(5)Hex(5)Fuc(2)NeuAc(1)	C[+57], N[+2409]	1109.22	4	4433.86	4433.84	0	4.5	78	Specific	154.46	118.72	18.09	2.78	106	>sp|P11279|LAMP1_HUMAN Lysosome-associated membrane glycoprotein 1 OS=Homo sapiens GN=LAMP1 PE=1 SV=3	9237	cacoP7gpep1.16246.16246.4	controllerType=0 controllerNumber=1 scan=16246	60.432
21962:4	3	R.SSC[+57.021]GKEN[+3065.100]TSDPSLVIAFGR.G	HexNAc(6)Hex(6)Fuc(2)NeuAc(2)	C[+57], N[+3065]	1273.02	4	5089.08	5090.07	-1	2.1	78	Specific	166.95	158.27	21.41	4.41	106	>sp|P11279|LAMP1_HUMAN Lysosome-associated membrane glycoprotein 1 OS=Homo sapiens GN=LAMP1 PE=1 SV=3	9237	cacoP7gpep1.19579.19579.4	controllerType=0 controllerNumber=1 scan=19579	75.3788
18108:4	3	R.SSC[+57.021]GKEN[+2993.079]TSDPSLVIAFGR.G	HexNAc(7)Hex(7)Fuc(1)NeuAc(1)	C[+57], N[+2993]	1255.27	4	5018.07	5018.05	0	4.3	78	Specific	172.22	139.83	14.75	4.24	106	>sp|P11279|LAMP1_HUMAN Lysosome-associated membrane glycoprotein 1 OS=Homo sapiens GN=LAMP1 PE=1 SV=3	9237	cacoP7gpep1.15852.15852.4	controllerType=0 controllerNumber=1 scan=15852	58.4758
18263:4	3	R.SSC[+57.021]GKEN[+3139.137]TSDPSLVIAFGR.G	HexNAc(7)Hex(7)Fuc(2)NeuAc(1)	C[+57], N[+3139]	1291.54	4	5163.15	5164.11	-1	9.1	78	Specific	176.43	128.98	128.98	2.11	106	>sp|P11279|LAMP1_HUMAN Lysosome-associated membrane glycoprotein 1 OS=Homo sapiens GN=LAMP1 PE=1 SV=3	9237	cacoP7gpep1.15976.15976.4	controllerType=0 controllerNumber=1 scan=15976	59.0917
21725:4	3	R.SSC[+57.021]GKEN[+3284.174]TSDPSLVIAFGR.G	HexNAc(7)Hex(7)Fuc(1)NeuAc(2)	C[+57], N[+3284]	1327.8	4	5308.16	5309.14	-1	3.7	78	Specific	182.7	177.82	177.82	4.56	106	>sp|P11279|LAMP1_HUMAN Lysosome-associated membrane glycoprotein 1 OS=Homo sapiens GN=LAMP1 PE=1 SV=3	9237	cacoP7gpep1.19246.19246.4	controllerType=0 controllerNumber=1 scan=19246	74.0013
15682:4	3	R.SSC[+57.021]GKEN[+1971.719]TSDPSLVIAFGR.G	HexNAc(5)Hex(5)Fuc(1)NeuAc(0)	C[+57], N[+1972]	999.929	4	3996.7	3996.69	0	1.7	78	Specific	183.4	107.59	107.59	2.79	106	>sp|P11279|LAMP1_HUMAN Lysosome-associated membrane glycoprotein 1 OS=Homo sapiens GN=LAMP1 PE=1 SV=3	9237	cacoP7gpep1.13997.13997.3	controllerType=0 controllerNumber=1 scan=13997	49.2012
22211:3	3	R.SSC[+57.021]GKEN[+2553.910]TSDPSLVIAFGR.G	HexNAc(5)Hex(5)Fuc(1)NeuAc(2)	C[+57], N[+2554]	1526.63	3	4577.88	4578.88	-1	1.6	78	Specific	187.57	158.48	158.48	4.65	106	>sp|P11279|LAMP1_HUMAN Lysosome-associated membrane glycoprotein 1 OS=Homo sapiens GN=LAMP1 PE=1 SV=3	9237	cacoP7gpep1.20022.20022.3	controllerType=0 controllerNumber=1 scan=20022	77.2289
21833:4	3	R.SSC[+57.021]GKEN[+2919.042]TSDPSLVIAFGR.G	HexNAc(6)Hex(6)Fuc(1)NeuAc(2)	C[+57], N[+2919]	1236.52	4	4943.04	4944.01	-1	6	78	Specific	193.83	131.55	131.55	4.3	106	>sp|P11279|LAMP1_HUMAN Lysosome-associated membrane glycoprotein 1 OS=Homo sapiens GN=LAMP1 PE=1 SV=3	9237	cacoP7gpep1.19403.19403.4	controllerType=0 controllerNumber=1 scan=19403	74.6523
21744:4	3	R.SSC[+57.021]GKEN[+3284.174]TSDPSLVIAFGR.G	HexNAc(7)Hex(7)Fuc(1)NeuAc(2)	C[+57], N[+3284]	1327.79	4	5308.15	5309.14	-1	2	78	Specific	195.16	136.02	136.02	4.37	106	>sp|P11279|LAMP1_HUMAN Lysosome-associated membrane glycoprotein 1 OS=Homo sapiens GN=LAMP1 PE=1 SV=3	9237	cacoP7gpep1.19278.19278.4	controllerType=0 controllerNumber=1 scan=19278	74.1318
18693:4	3	R.SSC[+57.021]GKEN[+2831.026]TSDPSLVIAFGR.G	HexNAc(7)Hex(6)Fuc(1)NeuAc(1)	C[+57], N[+2831]	1214.76	4	4856.03	4856	0	7.6	78	Specific	195.17	193.73	15.26	4.38	106	>sp|P11279|LAMP1_HUMAN Lysosome-associated membrane glycoprotein 1 OS=Homo sapiens GN=LAMP1 PE=1 SV=3	9237	cacoP7gpep1.16309.16309.4	controllerType=0 controllerNumber=1 scan=16309	60.7592
18581:4	3	R.SSC[+57.021]GKEN[+2408.872]TSDPSLVIAFGR.G	HexNAc(5)Hex(5)Fuc(2)NeuAc(1)	C[+57], N[+2409]	1109.22	4	4433.85	4433.84	0	1.6	78	Specific	201.33	136.13	23.09	4.25	106	>sp|P11279|LAMP1_HUMAN Lysosome-associated membrane glycoprotein 1 OS=Homo sapiens GN=LAMP1 PE=1 SV=3	9237	cacoP7gpep1.16219.16219.4	controllerType=0 controllerNumber=1 scan=16219	60.2977
21993:4	3	R.SSC[+57.021]GKEN[+3065.100]TSDPSLVIAFGR.G	HexNAc(6)Hex(6)Fuc(2)NeuAc(2)	C[+57], N[+3065]	1273.02	4	5089.07	5090.07	-1	1.1	78	Specific	215.19	199.78	33.4	4.57	106	>sp|P11279|LAMP1_HUMAN Lysosome-associated membrane glycoprotein 1 OS=Homo sapiens GN=LAMP1 PE=1 SV=3	9237	cacoP7gpep1.19622.19622.4	controllerType=0 controllerNumber=1 scan=19622	75.5457
18512:4	3	R.SSC[+57.021]GKEN[+2424.867]TSDPSLVIAFGR.G	HexNAc(5)Hex(6)Fuc(1)NeuAc(1)	C[+57], N[+2425]	1112.95	4	4448.79	4449.84	-1	-9	78	Specific	216.14	168.17	168.17	2.95	106	>sp|P11279|LAMP1_HUMAN Lysosome-associated membrane glycoprotein 1 OS=Homo sapiens GN=LAMP1 PE=1 SV=3	9237	cacoP7gpep1.16167.16167.4	controllerType=0 controllerNumber=1 scan=16167	60.0345
15822:3	3	R.SSC[+57.021]GKEN[+1850.693]TSDPSLVIAFGR.G	HexNAc(6)Hex(3)Fuc(1)NeuAc(0)	C[+57], N[+1851]	1292.57	3	3875.69	3875.66	0	6.3	78	Specific	217.63	160.21	160.21	3.04	106	>sp|P11279|LAMP1_HUMAN Lysosome-associated membrane glycoprotein 1 OS=Homo sapiens GN=LAMP1 PE=1 SV=3	9237	cacoP7gpep1.14105.14105.3	controllerType=0 controllerNumber=1 scan=14105	49.7415
21941:4	3	R.SSC[+57.021]GKEN[+2919.042]TSDPSLVIAFGR.G	HexNAc(6)Hex(6)Fuc(1)NeuAc(2)	C[+57], N[+2919]	1236.51	4	4943.03	4944.01	-1	3.4	78	Specific	234.53	179.83	179.83	6.13	106	>sp|P11279|LAMP1_HUMAN Lysosome-associated membrane glycoprotein 1 OS=Homo sapiens GN=LAMP1 PE=1 SV=3	9237	cacoP7gpep1.19547.19547.4	controllerType=0 controllerNumber=1 scan=19547	75.2529
18246:4	3	R.SSC[+57.021]GKEN[+3139.137]TSDPSLVIAFGR.G	HexNAc(7)Hex(7)Fuc(2)NeuAc(1)	C[+57], N[+3139]	1291.79	4	5164.15	5164.11	0	7.6	78	Specific	242.42	215.8	17.82	6.1	106	>sp|P11279|LAMP1_HUMAN Lysosome-associated membrane glycoprotein 1 OS=Homo sapiens GN=LAMP1 PE=1 SV=3	9237	cacoP7gpep1.15964.15964.4	controllerType=0 controllerNumber=1 scan=15964	59.0305
18738:3	3	R.SSC[+57.021]GKEN[+2465.894]TSDPSLVIAFGR.G	HexNAc(6)Hex(5)Fuc(1)NeuAc(1)	C[+57], N[+2466]	1497.63	3	4490.88	4490.86	0	3.4	78	Specific	244.97	181.44	22.81	6.42	106	>sp|P11279|LAMP1_HUMAN Lysosome-associated membrane glycoprotein 1 OS=Homo sapiens GN=LAMP1 PE=1 SV=3	9237	cacoP7gpep1.16343.16343.3	controllerType=0 controllerNumber=1 scan=16343	60.9333
18641:3	3	R.SSC[+57.021]GKEN[+2059.735]TSDPSLVIAFGR.G	HexNAc(4)Hex(5)Fuc(1)NeuAc(1)	C[+57], N[+2060]	1362.57	3	4085.71	4084.71	1	-0.3	78	Specific	251.46	199.34	49.87	6.2	106	>sp|P11279|LAMP1_HUMAN Lysosome-associated membrane glycoprotein 1 OS=Homo sapiens GN=LAMP1 PE=1 SV=3	9237	cacoP7gpep1.16265.16265.3	controllerType=0 controllerNumber=1 scan=16265	60.5272
15365:3	3	R.SSC[+57.021]GKEN[+1864.634]TSDPSLVIAFGR.G	HexNAc(2)Hex(9)Fuc(0)NeuAc(0)	C[+57], N[+1865]	1297.21	3	3889.61	3889.6	0	0.1	78	Specific	265.63	124.74	124.74	5.9	106	>sp|P11279|LAMP1_HUMAN Lysosome-associated membrane glycoprotein 1 OS=Homo sapiens GN=LAMP1 PE=1 SV=3	9237	cacoP7gpep1.13763.13763.3	controllerType=0 controllerNumber=1 scan=13763	48.0388
18896:3	3	R.SSC[+57.021]GKEN[+2101.782]TSDPSLVIAFGR.G	HexNAc(5)Hex(4)Fuc(3)NeuAc(0)	C[+57], N[+2102]	1375.93	3	4125.78	4126.75	-1	7.1	78	Specific	275.9	230.53	230.53	6.31	106	>sp|P11279|LAMP1_HUMAN Lysosome-associated membrane glycoprotein 1 OS=Homo sapiens GN=LAMP1 PE=1 SV=3	9237	cacoP7gpep1.16472.16472.3	controllerType=0 controllerNumber=1 scan=16472	61.5758
18703:4	3	R.SSC[+57.021]GKEN[+2465.894]TSDPSLVIAFGR.G	HexNAc(6)Hex(5)Fuc(1)NeuAc(1)	C[+57], N[+2466]	1123.48	4	4490.88	4490.86	0	3.2	78	Specific	300.14	261.04	20.03	6.42	106	>sp|P11279|LAMP1_HUMAN Lysosome-associated membrane glycoprotein 1 OS=Homo sapiens GN=LAMP1 PE=1 SV=3	9237	cacoP7gpep1.16317.16317.4	controllerType=0 controllerNumber=1 scan=16317	60.7986
15510:3	3	R.SSC[+57.021]GKEN[+2263.835]TSDPSLVIAFGR.G	HexNAc(5)Hex(5)Fuc(3)NeuAc(0)	C[+57], N[+2264]	1429.95	3	4287.83	4288.81	-1	7	78	Specific	301.93	231.7	231.7	6.46	106	>sp|P11279|LAMP1_HUMAN Lysosome-associated membrane glycoprotein 1 OS=Homo sapiens GN=LAMP1 PE=1 SV=3	9237	cacoP7gpep1.13871.13871.3	controllerType=0 controllerNumber=1 scan=13871	48.5748
19042:3	3	R.SSC[+57.021]GKEN[+1897.682]TSDPSLVIAFGR.G	HexNAc(4)Hex(4)Fuc(1)NeuAc(1)	C[+57], N[+1898]	1308.22	3	3922.66	3922.65	0	1.5	78	Specific	306.12	194.36	194.36	6.58	106	>sp|P11279|LAMP1_HUMAN Lysosome-associated membrane glycoprotein 1 OS=Homo sapiens GN=LAMP1 PE=1 SV=3	9237	cacoP7gpep1.16601.16601.3	controllerType=0 controllerNumber=1 scan=16601	62.2006
15678:4	3	R.SSC[+57.021]GKEN[+1971.719]TSDPSLVIAFGR.G	HexNAc(5)Hex(5)Fuc(1)NeuAc(0)	C[+57], N[+1972]	999.929	4	3996.7	3996.69	0	1.7	78	Specific	322.81	300.66	300.66	6.77	106	>sp|P11279|LAMP1_HUMAN Lysosome-associated membrane glycoprotein 1 OS=Homo sapiens GN=LAMP1 PE=1 SV=3	9237	cacoP7gpep1.13994.13994.4	controllerType=0 controllerNumber=1 scan=13994	49.1878
18919:3	3	R.SSC[+57.021]GKEN[+1694.603]TSDPSLVIAFGR.G	HexNAc(3)Hex(4)Fuc(1)NeuAc(1)	C[+57], N[+1695]	1240.53	3	3719.59	3719.57	0	4.4	78	Specific	333.49	235.85	235.85	6.7	106	>sp|P11279|LAMP1_HUMAN Lysosome-associated membrane glycoprotein 1 OS=Homo sapiens GN=LAMP1 PE=1 SV=3	9237	cacoP7gpep1.16490.16490.3	controllerType=0 controllerNumber=1 scan=16490	61.662
18944:3	3	R.SSC[+57.021]GKEN[+2100.761]TSDPSLVIAFGR.G	HexNAc(5)Hex(4)Fuc(1)NeuAc(1)	C[+57], N[+2101]	1375.93	3	4125.77	4125.73	0	8.6	78	Specific	359.44	287.53	20.87	6.35	106	>sp|P11279|LAMP1_HUMAN Lysosome-associated membrane glycoprotein 1 OS=Homo sapiens GN=LAMP1 PE=1 SV=3	9237	cacoP7gpep1.16511.16511.3	controllerType=0 controllerNumber=1 scan=16511	61.7648
15458:3	3	R.SSC[+57.021]GKEN[+2482.909]TSDPSLVIAFGR.G	HexNAc(6)Hex(6)Fuc(2)NeuAc(0)	C[+57], N[+2483]	1503.3	3	4507.89	4507.88	0	2.8	78	Specific	364.6	236.99	27.1	6.81	106	>sp|P11279|LAMP1_HUMAN Lysosome-associated membrane glycoprotein 1 OS=Homo sapiens GN=LAMP1 PE=1 SV=3	9237	cacoP7gpep1.13833.13833.3	controllerType=0 controllerNumber=1 scan=13833	48.387
18539:4	3	R.SSC[+57.021]GKEN[+2774.004]TSDPSLVIAFGR.G	HexNAc(6)Hex(6)Fuc(2)NeuAc(1)	C[+57], N[+2774]	1200.5	4	4798.99	4798.98	0	4	78	Specific	365.93	311.08	10.12	6.75	106	>sp|P11279|LAMP1_HUMAN Lysosome-associated membrane glycoprotein 1 OS=Homo sapiens GN=LAMP1 PE=1 SV=3	9237	cacoP7gpep1.16186.16186.4	controllerType=0 controllerNumber=1 scan=16186	60.1299
18723:3	3	R.SSC[+57.021]GKEN[+2262.814]TSDPSLVIAFGR.G	HexNAc(5)Hex(5)Fuc(1)NeuAc(1)	C[+57], N[+2263]	1429.95	3	4287.82	4287.78	0	8.4	78	Specific	375.55	304.85	21.37	6.51	106	>sp|P11279|LAMP1_HUMAN Lysosome-associated membrane glycoprotein 1 OS=Homo sapiens GN=LAMP1 PE=1 SV=3	9237	cacoP7gpep1.16331.16331.3	controllerType=0 controllerNumber=1 scan=16331	60.8716
18593:3	3	R.SSC[+57.021]GKEN[+2059.735]TSDPSLVIAFGR.G	HexNAc(4)Hex(5)Fuc(1)NeuAc(1)	C[+57], N[+2060]	1362.25	3	4084.73	4084.71	0	6.5	78	Specific	377.62	267.54	29.64	6.65	106	>sp|P11279|LAMP1_HUMAN Lysosome-associated membrane glycoprotein 1 OS=Homo sapiens GN=LAMP1 PE=1 SV=3	9237	cacoP7gpep1.16228.16228.3	controllerType=0 controllerNumber=1 scan=16228	60.3428
18812:4	3	R.SSC[+57.021]GKEN[+2262.814]TSDPSLVIAFGR.G	HexNAc(5)Hex(5)Fuc(1)NeuAc(1)	C[+57], N[+2263]	1072.71	4	4287.8	4287.78	0	3.2	78	Specific	379.49	302.34	21.05	6.75	106	>sp|P11279|LAMP1_HUMAN Lysosome-associated membrane glycoprotein 1 OS=Homo sapiens GN=LAMP1 PE=1 SV=3	9237	cacoP7gpep1.16403.16403.4	controllerType=0 controllerNumber=1 scan=16403	61.2344
18792:3	3	R.SSC[+57.021]GKEN[+1897.682]TSDPSLVIAFGR.G	HexNAc(4)Hex(4)Fuc(1)NeuAc(1)	C[+57], N[+1898]	1308.23	3	3922.67	3922.65	0	3.3	78	Specific	382.36	314.37	314.37	7.05	106	>sp|P11279|LAMP1_HUMAN Lysosome-associated membrane glycoprotein 1 OS=Homo sapiens GN=LAMP1 PE=1 SV=3	9237	cacoP7gpep1.16384.16384.3	controllerType=0 controllerNumber=1 scan=16384	61.1418
15731:3	3	R.SSC[+57.021]GKEN[+2012.745]TSDPSLVIAFGR.G	HexNAc(6)Hex(4)Fuc(1)NeuAc(0)	C[+57], N[+2013]	1346.58	3	4037.73	4037.72	0	3.3	78	Specific	384.84	291.71	291.71	6.91	106	>sp|P11279|LAMP1_HUMAN Lysosome-associated membrane glycoprotein 1 OS=Homo sapiens GN=LAMP1 PE=1 SV=3	9237	cacoP7gpep1.14037.14037.3	controllerType=0 controllerNumber=1 scan=14037	49.4024
15511:3	3	R.SSC[+57.021]GKEN[+2117.777]TSDPSLVIAFGR.G	HexNAc(5)Hex(5)Fuc(2)NeuAc(0)	C[+57], N[+2118]	1381.58	3	4142.74	4142.75	0	-1.8	78	Specific	386.28	246.12	12.63	6.14	106	>sp|P11279|LAMP1_HUMAN Lysosome-associated membrane glycoprotein 1 OS=Homo sapiens GN=LAMP1 PE=1 SV=3	9237	cacoP7gpep1.13872.13872.3	controllerType=0 controllerNumber=1 scan=13872	48.5803
22083:4	3	R.SSC[+57.021]GKEN[+2920.062]TSDPSLVIAFGR.G	HexNAc(6)Hex(6)Fuc(3)NeuAc(1)	C[+57], N[+2920]	1236.76	4	4944.03	4945.03	-1	-0.8	78	Specific	389.09	301.94	10.18	6.7	106	>sp|P11279|LAMP1_HUMAN Lysosome-associated membrane glycoprotein 1 OS=Homo sapiens GN=LAMP1 PE=1 SV=3	9237	cacoP7gpep1.19734.19734.4	controllerType=0 controllerNumber=1 scan=19734	76.0206
18564:3	3	R.SSC[+57.021]GKEN[+2627.947]TSDPSLVIAFGR.G	HexNAc(6)Hex(6)Fuc(1)NeuAc(1)	C[+57], N[+2628]	1551.65	3	4652.94	4652.92	0	5.4	78	Specific	391.83	285.75	19.06	6.88	106	>sp|P11279|LAMP1_HUMAN Lysosome-associated membrane glycoprotein 1 OS=Homo sapiens GN=LAMP1 PE=1 SV=3	9237	cacoP7gpep1.16205.16205.3	controllerType=0 controllerNumber=1 scan=16205	60.2253
15408:3	3	R.SSC[+57.021]GKEN[+2627.947]TSDPSLVIAFGR.G	HexNAc(6)Hex(6)Fuc(1)NeuAc(1)	C[+57], N[+2628]	1551.99	3	4653.94	4652.92	1	4.8	78	Specific	398.08	260.71	10.87	6.9	106	>sp|P11279|LAMP1_HUMAN Lysosome-associated membrane glycoprotein 1 OS=Homo sapiens GN=LAMP1 PE=1 SV=3	9237	cacoP7gpep1.13798.13798.3	controllerType=0 controllerNumber=1 scan=13798	48.2108
18649:4	3	R.SSC[+57.021]GKEN[+2262.814]TSDPSLVIAFGR.G	HexNAc(5)Hex(5)Fuc(1)NeuAc(1)	C[+57], N[+2263]	1072.71	4	4287.8	4287.78	0	3.3	78	Specific	398.84	261.58	17.83	6.64	106	>sp|P11279|LAMP1_HUMAN Lysosome-associated membrane glycoprotein 1 OS=Homo sapiens GN=LAMP1 PE=1 SV=3	9237	cacoP7gpep1.16272.16272.4	controllerType=0 controllerNumber=1 scan=16272	60.5612
18542:3	3	R.SSC[+57.021]GKEN[+2627.947]TSDPSLVIAFGR.G	HexNAc(6)Hex(6)Fuc(1)NeuAc(1)	C[+57], N[+2628]	1551.31	3	4651.92	4652.92	-1	1.8	78	Specific	399.28	336.64	336.64	7.26	106	>sp|P11279|LAMP1_HUMAN Lysosome-associated membrane glycoprotein 1 OS=Homo sapiens GN=LAMP1 PE=1 SV=3	9237	cacoP7gpep1.16188.16188.3	controllerType=0 controllerNumber=1 scan=16188	60.1411
15579:3	3	R.SSC[+57.021]GKEN[+2174.798]TSDPSLVIAFGR.G	HexNAc(6)Hex(5)Fuc(1)NeuAc(0)	C[+57], N[+2175]	1400.6	3	4199.79	4199.77	0	4.5	78	Specific	401.86	322.34	322.34	7.11	106	>sp|P11279|LAMP1_HUMAN Lysosome-associated membrane glycoprotein 1 OS=Homo sapiens GN=LAMP1 PE=1 SV=3	9237	cacoP7gpep1.13919.13919.3	controllerType=0 controllerNumber=1 scan=13919	48.818
15704:3	3	R.SSC[+57.021]GKEN[+1606.587]TSDPSLVIAFGR.G	HexNAc(4)Hex(4)Fuc(1)NeuAc(0)	C[+57], N[+1607]	1211.2	3	3631.57	3631.56	0	3.9	78	Specific	410.76	289.52	289.52	6.1	106	>sp|P11279|LAMP1_HUMAN Lysosome-associated membrane glycoprotein 1 OS=Homo sapiens GN=LAMP1 PE=1 SV=3	9237	cacoP7gpep1.14015.14015.3	controllerType=0 controllerNumber=1 scan=14015	49.2906
15428:3	3	R.SSC[+57.021]GKEN[+2262.814]TSDPSLVIAFGR.G	HexNAc(5)Hex(5)Fuc(1)NeuAc(1)	C[+57], N[+2263]	1430.28	3	4288.82	4287.78	1	6.8	78	Specific	418.87	333.07	24.66	6.9	106	>sp|P11279|LAMP1_HUMAN Lysosome-associated membrane glycoprotein 1 OS=Homo sapiens GN=LAMP1 PE=1 SV=3	9237	cacoP7gpep1.13811.13811.3	controllerType=0 controllerNumber=1 scan=13811	48.277
18781:3	3	R.SSC[+57.021]GKEN[+2262.814]TSDPSLVIAFGR.G	HexNAc(5)Hex(5)Fuc(1)NeuAc(1)	C[+57], N[+2263]	1429.94	3	4287.8	4287.78	0	4.5	78	Specific	437.45	304.35	34.13	7.19	106	>sp|P11279|LAMP1_HUMAN Lysosome-associated membrane glycoprotein 1 OS=Homo sapiens GN=LAMP1 PE=1 SV=3	9237	cacoP7gpep1.16377.16377.3	controllerType=0 controllerNumber=1 scan=16377	61.1033
18576:3	3	R.SSC[+57.021]GKEN[+2262.814]TSDPSLVIAFGR.G	HexNAc(5)Hex(5)Fuc(1)NeuAc(1)	C[+57], N[+2263]	1429.94	3	4287.81	4287.78	0	6.2	78	Specific	441.93	359.95	29.72	7.25	106	>sp|P11279|LAMP1_HUMAN Lysosome-associated membrane glycoprotein 1 OS=Homo sapiens GN=LAMP1 PE=1 SV=3	9237	cacoP7gpep1.16216.16216.3	controllerType=0 controllerNumber=1 scan=16216	60.2814
15609:3	3	R.SSC[+57.021]GKEN[+2174.798]TSDPSLVIAFGR.G	HexNAc(6)Hex(5)Fuc(1)NeuAc(0)	C[+57], N[+2175]	1400.6	3	4199.78	4199.77	0	3.7	78	Specific	446.72	340.81	340.81	7.44	106	>sp|P11279|LAMP1_HUMAN Lysosome-associated membrane glycoprotein 1 OS=Homo sapiens GN=LAMP1 PE=1 SV=3	9237	cacoP7gpep1.13944.13944.3	controllerType=0 controllerNumber=1 scan=13944	48.9411
15838:3	3	R.SSC[+57.021]GKEN[+1647.613]TSDPSLVIAFGR.G	HexNAc(5)Hex(3)Fuc(1)NeuAc(0)	C[+57], N[+1648]	1224.87	3	3672.6	3672.58	0	4.8	78	Specific	467.03	406.27	406.27	8.93	106	>sp|P11279|LAMP1_HUMAN Lysosome-associated membrane glycoprotein 1 OS=Homo sapiens GN=LAMP1 PE=1 SV=3	9237	cacoP7gpep1.14118.14118.3	controllerType=0 controllerNumber=1 scan=14118	49.8043
15827:3	3	R.SSC[+57.021]GKEN[+1444.534]TSDPSLVIAFGR.G	HexNAc(4)Hex(3)Fuc(1)NeuAc(0)	C[+57], N[+1445]	1157.18	3	3469.52	3469.5	0	5.5	78	Specific	470.27	374.57	374.57	7.58	106	>sp|P11279|LAMP1_HUMAN Lysosome-associated membrane glycoprotein 1 OS=Homo sapiens GN=LAMP1 PE=1 SV=3	9237	cacoP7gpep1.14110.14110.3	controllerType=0 controllerNumber=1 scan=14110	49.7648
15604:3	3	R.SSC[+57.021]GKEN[+1930.692]TSDPSLVIAFGR.G	HexNAc(4)Hex(6)Fuc(1)NeuAc(0)	C[+57], N[+1931]	1319.23	3	3955.69	3955.66	0	5.6	78	Specific	490.93	231.09	231.09	7.05	106	>sp|P11279|LAMP1_HUMAN Lysosome-associated membrane glycoprotein 1 OS=Homo sapiens GN=LAMP1 PE=1 SV=3	9237	cacoP7gpep1.13939.13939.3	controllerType=0 controllerNumber=1 scan=13939	48.9187
15333:3	3	R.SSC[+57.021]GKEN[+1702.581]TSDPSLVIAFGR.G	HexNAc(2)Hex(8)Fuc(0)NeuAc(0)	C[+57], N[+1703]	1243.19	3	3727.56	3727.55	0	1.7	78	Specific	517.91	286.45	286.45	7.32	106	>sp|P11279|LAMP1_HUMAN Lysosome-associated membrane glycoprotein 1 OS=Homo sapiens GN=LAMP1 PE=1 SV=3	9237	cacoP7gpep1.13736.13736.3	controllerType=0 controllerNumber=1 scan=13736	47.9022
18611:4	3	R.SSC[+57.021]GKEN[+2627.947]TSDPSLVIAFGR.G	HexNAc(6)Hex(6)Fuc(1)NeuAc(1)	C[+57], N[+2628]	1163.99	4	4652.93	4652.92	0	2.5	78	Specific	525.94	405.69	23.8	9.04	106	>sp|P11279|LAMP1_HUMAN Lysosome-associated membrane glycoprotein 1 OS=Homo sapiens GN=LAMP1 PE=1 SV=3	9237	cacoP7gpep1.16242.16242.4	controllerType=0 controllerNumber=1 scan=16242	60.4104
15480:3	3	R.SSC[+57.021]GKEN[+2262.814]TSDPSLVIAFGR.G	HexNAc(5)Hex(5)Fuc(1)NeuAc(1)	C[+57], N[+2263]	1429.95	3	4287.83	4287.78	0	9.4	78	Specific	547.04	392.3	24.61	8.61	106	>sp|P11279|LAMP1_HUMAN Lysosome-associated membrane glycoprotein 1 OS=Homo sapiens GN=LAMP1 PE=1 SV=3	9237	cacoP7gpep1.13850.13850.3	controllerType=0 controllerNumber=1 scan=13850	48.4701
15574:3	3	R.SSC[+57.021]GKEN[+1971.719]TSDPSLVIAFGR.G	HexNAc(5)Hex(5)Fuc(1)NeuAc(0)	C[+57], N[+1972]	1332.91	3	3996.72	3996.69	0	8.3	78	Specific	557.69	413.74	413.74	8.79	106	>sp|P11279|LAMP1_HUMAN Lysosome-associated membrane glycoprotein 1 OS=Homo sapiens GN=LAMP1 PE=1 SV=3	9237	cacoP7gpep1.13916.13916.3	controllerType=0 controllerNumber=1 scan=13916	48.8017
15730:3	3	R.SSC[+57.021]GKEN[+1809.666]TSDPSLVIAFGR.G	HexNAc(5)Hex(4)Fuc(1)NeuAc(0)	C[+57], N[+1810]	1278.89	3	3834.64	3834.64	0	1.9	78	Specific	634.7	509.49	509.49	11.68	106	>sp|P11279|LAMP1_HUMAN Lysosome-associated membrane glycoprotein 1 OS=Homo sapiens GN=LAMP1 PE=1 SV=3	9237	cacoP7gpep1.14036.14036.3	controllerType=0 controllerNumber=1 scan=14036	49.397
15607:3	3	R.SSC[+57.021]GKEN[+1971.719]TSDPSLVIAFGR.G	HexNAc(5)Hex(5)Fuc(1)NeuAc(0)	C[+57], N[+1972]	1332.91	3	3996.71	3996.69	0	5.9	78	Specific	644.24	486.53	486.53	11.62	106	>sp|P11279|LAMP1_HUMAN Lysosome-associated membrane glycoprotein 1 OS=Homo sapiens GN=LAMP1 PE=1 SV=3	9237	cacoP7gpep1.13942.13942.3	controllerType=0 controllerNumber=1 scan=13942	48.9307
18966:3	3	R.SSC[+57.021]GKEN[+1694.603]TSDPSLVIAFGR.G	HexNAc(3)Hex(4)Fuc(1)NeuAc(1)	C[+57], N[+1695]	1240.53	3	3719.58	3719.57	0	1.6	78	Specific	664.51	526.79	526.79	12.68	106	>sp|P11279|LAMP1_HUMAN Lysosome-associated membrane glycoprotein 1 OS=Homo sapiens GN=LAMP1 PE=1 SV=3	9237	cacoP7gpep1.16535.16535.3	controllerType=0 controllerNumber=1 scan=16535	61.8789
15742:3	3	R.SSC[+57.021]GKEN[+1403.507]TSDPSLVIAFGR.G	HexNAc(3)Hex(4)Fuc(1)NeuAc(0)	C[+57], N[+1404]	1143.5	3	3428.5	3428.48	0	5.9	78	Specific	687.58	559.63	559.63	12.62	106	>sp|P11279|LAMP1_HUMAN Lysosome-associated membrane glycoprotein 1 OS=Homo sapiens GN=LAMP1 PE=1 SV=3	9237	cacoP7gpep1.14047.14047.3	controllerType=0 controllerNumber=1 scan=14047	49.4526
15740:3	3	R.SSC[+57.021]GKEN[+1606.587]TSDPSLVIAFGR.G	HexNAc(4)Hex(4)Fuc(1)NeuAc(0)	C[+57], N[+1607]	1211.19	3	3631.57	3631.56	0	2.1	78	Specific	716.63	562.94	562.94	13.68	106	>sp|P11279|LAMP1_HUMAN Lysosome-associated membrane glycoprotein 1 OS=Homo sapiens GN=LAMP1 PE=1 SV=3	9237	cacoP7gpep1.14045.14045.3	controllerType=0 controllerNumber=1 scan=14045	49.4414
19558:3	3	K.EN[+1946.687]TSDPSLVIAFGR.G	HexNAc(4)Hex(7)Fuc(0)NeuAc(0)	N[+1947]	1151.5	3	3452.48	3452.45	0	8.6	83	Specific	122.74	71.75	71.75	2	106	>sp|P11279|LAMP1_HUMAN Lysosome-associated membrane glycoprotein 1 OS=Homo sapiens GN=LAMP1 PE=1 SV=3	9237	cacoP7gpep1.17077.17077.3	controllerType=0 controllerNumber=1 scan=17077	64.3626
19415:3	3	K.EN[+1702.581]TSDPSLVIAFGR.G	HexNAc(2)Hex(8)Fuc(0)NeuAc(0)	N[+1703]	1070.12	3	3208.36	3208.34	0	4.5	83	Specific	218.87	212.51	212.51	3.75	106	>sp|P11279|LAMP1_HUMAN Lysosome-associated membrane glycoprotein 1 OS=Homo sapiens GN=LAMP1 PE=1 SV=3	9237	cacoP7gpep1.16956.16956.3	controllerType=0 controllerNumber=1 scan=16956	63.8019
19442:3	3	K.EN[+1702.581]TSDPSLVIAFGR.G	HexNAc(2)Hex(8)Fuc(0)NeuAc(0)	N[+1703]	1070.13	3	3208.36	3208.34	0	7.3	83	Specific	272.78	220.11	220.11	5.5	106	>sp|P11279|LAMP1_HUMAN Lysosome-associated membrane glycoprotein 1 OS=Homo sapiens GN=LAMP1 PE=1 SV=3	9237	cacoP7gpep1.16974.16974.3	controllerType=0 controllerNumber=1 scan=16974	63.8885
19358:3	3	K.EN[+1864.634]TSDPSLVIAFGR.G	HexNAc(2)Hex(9)Fuc(0)NeuAc(0)	N[+1865]	1124.15	3	3370.43	3370.39	0	9.6	83	Specific	309.56	122.95	122.95	4.82	106	>sp|P11279|LAMP1_HUMAN Lysosome-associated membrane glycoprotein 1 OS=Homo sapiens GN=LAMP1 PE=1 SV=3	9237	cacoP7gpep1.16908.16908.3	controllerType=0 controllerNumber=1 scan=16908	63.5762
15532:3	3	K.E[-18.011]N[+2466.914]TSDPSLVIAFGR.G	HexNAc(6)Hex(5)Fuc(3)NeuAc(0)	E[-18], N[+2467]	1318.89	3	3954.67	3954.66	0	0.7	83	Specific	224.2	149.24	149.24	4.47	106	>sp|P11279|LAMP1_HUMAN Lysosome-associated membrane glycoprotein 1 OS=Homo sapiens GN=LAMP1 PE=1 SV=3	9237	cacoP7gpep1.13887.13887.3	controllerType=0 controllerNumber=1 scan=13887	48.6578
11447:3	3	R.GHTLTLN[+2092.745]FTR.N	HexNAc(4)Hex(7)Fuc(1)NeuAc(0)	N[+2093]	1084.8	3	3252.38	3252.37	0	4.5	97	Specific	219.36	42.35	42.35	2.46	106	>sp|P11279|LAMP1_HUMAN Lysosome-associated membrane glycoprotein 1 OS=Homo sapiens GN=LAMP1 PE=1 SV=3	9237	cacoP7gpep1.10742.10742.3	controllerType=0 controllerNumber=1 scan=10742	34.283
14937:3	3	R.GHTLTLN[+2075.730]FTR.N	HexNAc(4)Hex(6)Fuc(0)NeuAc(1)	N[+2076]	1079.12	3	3235.34	3235.35	0	-3.9	97	Specific	221.97	43.3	43.3	3.26	106	>sp|P11279|LAMP1_HUMAN Lysosome-associated membrane glycoprotein 1 OS=Homo sapiens GN=LAMP1 PE=1 SV=3	9237	cacoP7gpep1.13419.13419.3	controllerType=0 controllerNumber=1 scan=13419	46.3395
11455:3	3	R.GHTLTLN[+1784.634]FTR.N	HexNAc(4)Hex(6)Fuc(0)NeuAc(0)	N[+1785]	982.086	3	2944.24	2944.26	0	-4.2	97	Specific	264.12	74.17	74.17	2.92	106	>sp|P11279|LAMP1_HUMAN Lysosome-associated membrane glycoprotein 1 OS=Homo sapiens GN=LAMP1 PE=1 SV=3	9237	cacoP7gpep1.10749.10749.3	controllerType=0 controllerNumber=1 scan=10749	34.3142
11415:3	3	R.GHTLTLN[+1946.687]FTR.N	HexNAc(4)Hex(7)Fuc(0)NeuAc(0)	N[+1947]	1036.11	3	3106.33	3106.31	0	5.8	97	Specific	275.38	106.43	106.43	5.21	106	>sp|P11279|LAMP1_HUMAN Lysosome-associated membrane glycoprotein 1 OS=Homo sapiens GN=LAMP1 PE=1 SV=3	9237	cacoP7gpep1.10718.10718.3	controllerType=0 controllerNumber=1 scan=10718	34.191
15063:3	3	R.GHTLTLN[+1872.651]FTR.N	HexNAc(3)Hex(6)Fuc(0)NeuAc(1)	N[+1873]	1011.43	3	3032.28	3032.27	0	1.8	97	Specific	276.82	80.92	80.92	5.04	106	>sp|P11279|LAMP1_HUMAN Lysosome-associated membrane glycoprotein 1 OS=Homo sapiens GN=LAMP1 PE=1 SV=3	9237	cacoP7gpep1.13516.13516.3	controllerType=0 controllerNumber=1 scan=13516	46.8218
11424:3	3	R.GHTLTLN[+1946.687]FTR.N	HexNAc(4)Hex(7)Fuc(0)NeuAc(0)	N[+1947]	1036.11	3	3106.31	3106.31	0	0.8	97	Specific	306.9	65.6	65.6	4.92	106	>sp|P11279|LAMP1_HUMAN Lysosome-associated membrane glycoprotein 1 OS=Homo sapiens GN=LAMP1 PE=1 SV=3	9237	cacoP7gpep1.10725.10725.3	controllerType=0 controllerNumber=1 scan=10725	34.2138
11550:3	3	R.GHTLTLN[+1581.555]FTR.N	HexNAc(3)Hex(6)Fuc(0)NeuAc(0)	N[+1582]	914.397	3	2741.18	2741.18	0	-0.3	97	Specific	314.02	140.84	140.84	5.43	106	>sp|P11279|LAMP1_HUMAN Lysosome-associated membrane glycoprotein 1 OS=Homo sapiens GN=LAMP1 PE=1 SV=3	9237	cacoP7gpep1.10822.10822.3	controllerType=0 controllerNumber=1 scan=10822	34.5743
11505:3	3	R.GHTLTLN[+1378.476]FTR.N	HexNAc(2)Hex(6)Fuc(0)NeuAc(0)	N[+1378]	846.707	3	2538.11	2538.1	0	3.3	97	Specific	353.26	175.62	175.62	5.97	106	>sp|P11279|LAMP1_HUMAN Lysosome-associated membrane glycoprotein 1 OS=Homo sapiens GN=LAMP1 PE=1 SV=3	9237	cacoP7gpep1.10788.10788.3	controllerType=0 controllerNumber=1 scan=10788	34.4507
11496:3	3	R.GHTLTLN[+1784.634]FTR.N	HexNAc(4)Hex(6)Fuc(0)NeuAc(0)	N[+1785]	982.092	3	2944.26	2944.26	0	1.8	97	Specific	364.12	154.28	154.28	5.84	106	>sp|P11279|LAMP1_HUMAN Lysosome-associated membrane glycoprotein 1 OS=Homo sapiens GN=LAMP1 PE=1 SV=3	9237	cacoP7gpep1.10782.10782.3	controllerType=0 controllerNumber=1 scan=10782	34.4324
11226:3	3	R.GHTLTLN[+1702.581]FTR.N	HexNAc(2)Hex(8)Fuc(0)NeuAc(0)	N[+1703]	954.741	3	2862.21	2862.2	0	2.3	97	Specific	366.16	157.29	157.29	5.92	106	>sp|P11279|LAMP1_HUMAN Lysosome-associated membrane glycoprotein 1 OS=Homo sapiens GN=LAMP1 PE=1 SV=3	9237	cacoP7gpep1.10565.10565.3	controllerType=0 controllerNumber=1 scan=10565	33.669
11279:3	3	R.GHTLTLN[+1540.529]FTR.N	HexNAc(2)Hex(7)Fuc(0)NeuAc(0)	N[+1541]	900.725	3	2700.16	2700.15	0	3.1	97	Specific	406.43	194.67	194.67	6.18	106	>sp|P11279|LAMP1_HUMAN Lysosome-associated membrane glycoprotein 1 OS=Homo sapiens GN=LAMP1 PE=1 SV=3	9237	cacoP7gpep1.10611.10611.3	controllerType=0 controllerNumber=1 scan=10611	33.8173
14875:3	3	R.GHTLTLN[+1872.651]FTR.N	HexNAc(3)Hex(6)Fuc(0)NeuAc(1)	N[+1873]	1011.43	3	3032.27	3032.27	0	-0.9	97	Specific	466.93	318.74	318.74	6.17	106	>sp|P11279|LAMP1_HUMAN Lysosome-associated membrane glycoprotein 1 OS=Homo sapiens GN=LAMP1 PE=1 SV=3	9237	cacoP7gpep1.13373.13373.3	controllerType=0 controllerNumber=1 scan=13373	46.1101
00788:3	3	R.KDN[+1971.719]TTVTR.L	HexNAc(5)Hex(5)Fuc(1)NeuAc(0)	N[+1972]	969.411	3	2906.22	2906.21	0	1.7	247	Specific	262.2	45.18	45.18	4.5	106	>sp|P11279|LAMP1_HUMAN Lysosome-associated membrane glycoprotein 1 OS=Homo sapiens GN=LAMP1 PE=1 SV=3	9237	cacoP7gpep1.2456.2456.3	controllerType=0 controllerNumber=1 scan=2456	10.137
00839:3	3	R.KDN[+2262.814]TTVTR.L	HexNAc(5)Hex(5)Fuc(1)NeuAc(1)	N[+2263]	1066.44	3	3197.32	3197.31	0	3.3	247	Specific	322.33	67.88	67.88	5.11	106	>sp|P11279|LAMP1_HUMAN Lysosome-associated membrane glycoprotein 1 OS=Homo sapiens GN=LAMP1 PE=1 SV=3	9237	cacoP7gpep1.2495.2495.3	controllerType=0 controllerNumber=1 scan=2495	10.2875
00807:2	3	R.KDN[+1971.719]TTVTR.L	HexNAc(5)Hex(5)Fuc(1)NeuAc(0)	N[+1972]	1453.62	2	2906.24	2906.21	0	7.9	247	Specific	340.29	111.77	111.77	3.28	106	>sp|P11279|LAMP1_HUMAN Lysosome-associated membrane glycoprotein 1 OS=Homo sapiens GN=LAMP1 PE=1 SV=3	9237	cacoP7gpep1.2470.2470.2	controllerType=0 controllerNumber=1 scan=2470	10.192
09982:3	3	R.LLNINPN[+2482.909]K.T	HexNAc(6)Hex(6)Fuc(2)NeuAc(0)	N[+2483]	1136.83	3	3408.47	3408.46	0	4.5	255	Specific	121.42	111.18	111.18	2.91	106	>sp|P11279|LAMP1_HUMAN Lysosome-associated membrane glycoprotein 1 OS=Homo sapiens GN=LAMP1 PE=1 SV=3	9237	cacoP7gpep1.9508.9508.3	controllerType=0 controllerNumber=1 scan=9508	30.2339
10331:3	3	R.LLNINPN[+2482.909]K.T	HexNAc(6)Hex(6)Fuc(2)NeuAc(0)	N[+2483]	1136.83	3	3408.48	3408.46	0	8.4	255	Specific	149.88	108.07	108.07	2.49	106	>sp|P11279|LAMP1_HUMAN Lysosome-associated membrane glycoprotein 1 OS=Homo sapiens GN=LAMP1 PE=1 SV=3	9237	cacoP7gpep1.9782.9782.3	controllerType=0 controllerNumber=1 scan=9782	31.102
08934:3	3	R.LLNINPN[+2701.983]K.T	HexNAc(7)Hex(7)Fuc(1)NeuAc(0)	N[+2702]	1209.86	3	3627.56	3627.53	0	7.2	255	Specific	158.29	123.43	123.43	2.94	106	>sp|P11279|LAMP1_HUMAN Lysosome-associated membrane glycoprotein 1 OS=Homo sapiens GN=LAMP1 PE=1 SV=3	9237	cacoP7gpep1.8700.8700.3	controllerType=0 controllerNumber=1 scan=8700	27.7785
13065:3	3	R.LLNINPN[+2424.867]K.T	HexNAc(5)Hex(6)Fuc(1)NeuAc(1)	N[+2425]	1117.48	3	3350.43	3350.41	0	5.9	255	Specific	161.5	105.62	105.62	2.88	106	>sp|P11279|LAMP1_HUMAN Lysosome-associated membrane glycoprotein 1 OS=Homo sapiens GN=LAMP1 PE=1 SV=3	9237	cacoP7gpep1.11965.11965.3	controllerType=0 controllerNumber=1 scan=11965	39.2957
13543:3	3	R.LLNINPN[+2774.004]K.T	HexNAc(6)Hex(6)Fuc(2)NeuAc(1)	N[+2774]	1233.86	3	3699.58	3699.55	0	7.4	255	Specific	189.62	104.66	104.66	2.85	106	>sp|P11279|LAMP1_HUMAN Lysosome-associated membrane glycoprotein 1 OS=Homo sapiens GN=LAMP1 PE=1 SV=3	9237	cacoP7gpep1.12335.12335.3	controllerType=0 controllerNumber=1 scan=12335	40.984
10033:3	3	R.LLNINPN[+2482.909]K.T	HexNAc(6)Hex(6)Fuc(2)NeuAc(0)	N[+2483]	1136.83	3	3408.48	3408.46	0	8.3	255	Specific	211.05	133.95	133.95	2.77	106	>sp|P11279|LAMP1_HUMAN Lysosome-associated membrane glycoprotein 1 OS=Homo sapiens GN=LAMP1 PE=1 SV=3	9237	cacoP7gpep1.9546.9546.3	controllerType=0 controllerNumber=1 scan=9546	30.3476
08633:3	3	R.LLNINPN[+1581.555]K.T	HexNAc(3)Hex(6)Fuc(0)NeuAc(0)	N[+1582]	836.378	3	2507.12	2507.1	0	6.6	255	Specific	225.91	82.39	82.39	3.08	106	>sp|P11279|LAMP1_HUMAN Lysosome-associated membrane glycoprotein 1 OS=Homo sapiens GN=LAMP1 PE=1 SV=3	9237	cacoP7gpep1.8468.8468.3	controllerType=0 controllerNumber=1 scan=8468	27.1276
13286:3	3	R.LLNINPN[+1856.656]K.T	HexNAc(3)Hex(5)Fuc(1)NeuAc(1)	N[+1857]	928.075	3	2782.21	2782.2	0	3	255	Specific	252.4	81.32	81.32	4.9	106	>sp|P11279|LAMP1_HUMAN Lysosome-associated membrane glycoprotein 1 OS=Homo sapiens GN=LAMP1 PE=1 SV=3	9237	cacoP7gpep1.12137.12137.3	controllerType=0 controllerNumber=1 scan=12137	40.0525
13511:3	3	R.LLNINPN[+2775.025]K.T	HexNAc(6)Hex(6)Fuc(4)NeuAc(0)	N[+2775]	1234.2	3	3700.58	3700.57	0	3.2	255	Specific	254.02	175.82	175.82	5.46	106	>sp|P11279|LAMP1_HUMAN Lysosome-associated membrane glycoprotein 1 OS=Homo sapiens GN=LAMP1 PE=1 SV=3	9237	cacoP7gpep1.12310.12310.3	controllerType=0 controllerNumber=1 scan=12310	40.8694
10027:3	3	R.LLNINPN[+2336.851]K.T	HexNAc(6)Hex(6)Fuc(1)NeuAc(0)	N[+2337]	1088.14	3	3262.4	3262.4	0	-0.1	255	Specific	272.6	171.7	171.7	5.22	106	>sp|P11279|LAMP1_HUMAN Lysosome-associated membrane glycoprotein 1 OS=Homo sapiens GN=LAMP1 PE=1 SV=3	9237	cacoP7gpep1.9541.9541.3	controllerType=0 controllerNumber=1 scan=9541	30.3339
08749:3	3	R.LLNINPN[+1946.687]K.T	HexNAc(4)Hex(7)Fuc(0)NeuAc(0)	N[+1947]	958.087	3	2872.25	2872.23	0	4.9	255	Specific	276.25	224.39	224.39	4.7	106	>sp|P11279|LAMP1_HUMAN Lysosome-associated membrane glycoprotein 1 OS=Homo sapiens GN=LAMP1 PE=1 SV=3	9237	cacoP7gpep1.8555.8555.3	controllerType=0 controllerNumber=1 scan=8555	27.3663
08774:3	3	R.LLNINPN[+1784.634]K.T	HexNAc(4)Hex(6)Fuc(0)NeuAc(0)	N[+1785]	904.068	3	2710.19	2710.18	0	2.7	255	Specific	280.91	148.35	148.35	5.48	106	>sp|P11279|LAMP1_HUMAN Lysosome-associated membrane glycoprotein 1 OS=Homo sapiens GN=LAMP1 PE=1 SV=3	9237	cacoP7gpep1.8574.8574.3	controllerType=0 controllerNumber=1 scan=8574	27.4098
13090:3	3	R.LLNINPN[+2262.814]K.T	HexNAc(5)Hex(5)Fuc(1)NeuAc(1)	N[+2263]	1063.46	3	3188.36	3188.36	0	-0.2	255	Specific	287.24	174.21	174.21	5.33	106	>sp|P11279|LAMP1_HUMAN Lysosome-associated membrane glycoprotein 1 OS=Homo sapiens GN=LAMP1 PE=1 SV=3	9237	cacoP7gpep1.11985.11985.3	controllerType=0 controllerNumber=1 scan=11985	39.3865
09197:2	3	R.LLNINPN[+1565.560]K.T	HexNAc(3)Hex(5)Fuc(1)NeuAc(0)	N[+1566]	1246.06	2	2491.12	2491.11	0	6.2	255	Specific	287.89	236.39	236.39	5.64	106	>sp|P11279|LAMP1_HUMAN Lysosome-associated membrane glycoprotein 1 OS=Homo sapiens GN=LAMP1 PE=1 SV=3	9237	cacoP7gpep1.8906.8906.2	controllerType=0 controllerNumber=1 scan=8906	28.3558
09637:2	3	R.LLNINPN[+1768.640]K.T	HexNAc(4)Hex(5)Fuc(1)NeuAc(0)	N[+1769]	1347.6	2	2694.19	2694.19	0	0.6	255	Specific	291.02	196.67	196.67	5.81	106	>sp|P11279|LAMP1_HUMAN Lysosome-associated membrane glycoprotein 1 OS=Homo sapiens GN=LAMP1 PE=1 SV=3	9237	cacoP7gpep1.9246.9246.2	controllerType=0 controllerNumber=1 scan=9246	29.3239
08984:2	3	R.LLNINPN[+1930.692]K.T	HexNAc(4)Hex(6)Fuc(1)NeuAc(0)	N[+1931]	1428.63	2	2856.25	2856.24	0	3.4	255	Specific	298.38	138.67	138.67	5.57	106	>sp|P11279|LAMP1_HUMAN Lysosome-associated membrane glycoprotein 1 OS=Homo sapiens GN=LAMP1 PE=1 SV=3	9237	cacoP7gpep1.8740.8740.2	controllerType=0 controllerNumber=1 scan=8740	27.8916
12925:3	3	R.LLNINPN[+1872.651]K.T	HexNAc(3)Hex(6)Fuc(0)NeuAc(1)	N[+1873]	933.405	3	2798.2	2798.2	0	1.6	255	Specific	299.8	104.44	104.44	5.15	106	>sp|P11279|LAMP1_HUMAN Lysosome-associated membrane glycoprotein 1 OS=Homo sapiens GN=LAMP1 PE=1 SV=3	9237	cacoP7gpep1.11857.11857.3	controllerType=0 controllerNumber=1 scan=11857	38.7916
12939:3	3	R.LLNINPN[+1856.656]K.T	HexNAc(3)Hex(5)Fuc(1)NeuAc(1)	N[+1857]	928.074	3	2782.21	2782.2	0	1.7	255	Specific	304.51	71.65	71.65	4.75	106	>sp|P11279|LAMP1_HUMAN Lysosome-associated membrane glycoprotein 1 OS=Homo sapiens GN=LAMP1 PE=1 SV=3	9237	cacoP7gpep1.11869.11869.3	controllerType=0 controllerNumber=1 scan=11869	38.847
10064:3	3	R.LLNINPN[+2336.851]K.T	HexNAc(6)Hex(6)Fuc(1)NeuAc(0)	N[+2337]	1088.14	3	3262.41	3262.4	0	2.7	255	Specific	320.71	205.55	205.55	5.93	106	>sp|P11279|LAMP1_HUMAN Lysosome-associated membrane glycoprotein 1 OS=Homo sapiens GN=LAMP1 PE=1 SV=3	9237	cacoP7gpep1.9568.9568.3	controllerType=0 controllerNumber=1 scan=9568	30.4178
08973:2	3	R.LLNINPN[+1419.502]K.T	HexNAc(3)Hex(5)Fuc(0)NeuAc(0)	N[+1420]	1173.03	2	2345.06	2345.05	0	2.7	255	Specific	327.25	197.88	197.88	6.14	106	>sp|P11279|LAMP1_HUMAN Lysosome-associated membrane glycoprotein 1 OS=Homo sapiens GN=LAMP1 PE=1 SV=3	9237	cacoP7gpep1.8730.8730.2	controllerType=0 controllerNumber=1 scan=8730	27.8635
12708:3	3	R.LLNINPN[+2018.708]K.T	HexNAc(3)Hex(6)Fuc(1)NeuAc(1)	N[+2019]	982.089	3	2944.25	2944.25	0	-0.9	255	Specific	342.23	260.39	260.39	5.47	106	>sp|P11279|LAMP1_HUMAN Lysosome-associated membrane glycoprotein 1 OS=Homo sapiens GN=LAMP1 PE=1 SV=3	9237	cacoP7gpep1.11697.11697.3	controllerType=0 controllerNumber=1 scan=11697	38.068
09157:2	3	R.LLNINPN[+1565.560]K.T	HexNAc(3)Hex(5)Fuc(1)NeuAc(0)	N[+1566]	1246.06	2	2491.11	2491.11	0	2.9	255	Specific	358.38	292.89	292.89	6.28	106	>sp|P11279|LAMP1_HUMAN Lysosome-associated membrane glycoprotein 1 OS=Homo sapiens GN=LAMP1 PE=1 SV=3	9237	cacoP7gpep1.8875.8875.2	controllerType=0 controllerNumber=1 scan=8875	28.2659
09191:2	3	R.LLNINPN[+1784.634]K.T	HexNAc(4)Hex(6)Fuc(0)NeuAc(0)	N[+1785]	1355.59	2	2710.18	2710.18	0	-2.2	255	Specific	365.66	218.84	218.84	5.44	106	>sp|P11279|LAMP1_HUMAN Lysosome-associated membrane glycoprotein 1 OS=Homo sapiens GN=LAMP1 PE=1 SV=3	9237	cacoP7gpep1.8901.8901.2	controllerType=0 controllerNumber=1 scan=8901	28.3377
12613:3	3	R.LLNINPN[+1872.651]K.T	HexNAc(3)Hex(6)Fuc(0)NeuAc(1)	N[+1873]	933.404	3	2798.2	2798.2	0	0.6	255	Specific	366.35	152.58	152.58	5.53	106	>sp|P11279|LAMP1_HUMAN Lysosome-associated membrane glycoprotein 1 OS=Homo sapiens GN=LAMP1 PE=1 SV=3	9237	cacoP7gpep1.11619.11619.3	controllerType=0 controllerNumber=1 scan=11619	37.748
13284:2	3	R.LLNINPN[+1856.656]K.T	HexNAc(3)Hex(5)Fuc(1)NeuAc(1)	N[+1857]	1391.61	2	2782.21	2782.2	0	4.5	255	Specific	370.18	282.8	282.8	6.21	106	>sp|P11279|LAMP1_HUMAN Lysosome-associated membrane glycoprotein 1 OS=Homo sapiens GN=LAMP1 PE=1 SV=3	9237	cacoP7gpep1.12134.12134.2	controllerType=0 controllerNumber=1 scan=12134	40.0406
08639:2	3	R.LLNINPN[+1581.555]K.T	HexNAc(3)Hex(6)Fuc(0)NeuAc(0)	N[+1582]	1254.06	2	2507.11	2507.1	0	4.2	255	Specific	380.73	142.78	142.78	5.88	106	>sp|P11279|LAMP1_HUMAN Lysosome-associated membrane glycoprotein 1 OS=Homo sapiens GN=LAMP1 PE=1 SV=3	9237	cacoP7gpep1.8471.8471.2	controllerType=0 controllerNumber=1 scan=8471	27.1338
08761:2	3	R.LLNINPN[+1784.634]K.T	HexNAc(4)Hex(6)Fuc(0)NeuAc(0)	N[+1785]	1355.6	2	2710.2	2710.18	0	5.4	255	Specific	386.72	148.44	148.44	5.83	106	>sp|P11279|LAMP1_HUMAN Lysosome-associated membrane glycoprotein 1 OS=Homo sapiens GN=LAMP1 PE=1 SV=3	9237	cacoP7gpep1.8562.8562.2	controllerType=0 controllerNumber=1 scan=8562	27.3838
12657:2	3	R.LLNINPN[+1872.651]K.T	HexNAc(3)Hex(6)Fuc(0)NeuAc(1)	N[+1873]	1399.61	2	2798.22	2798.2	0	7.2	255	Specific	390.19	168.99	168.99	5.94	106	>sp|P11279|LAMP1_HUMAN Lysosome-associated membrane glycoprotein 1 OS=Homo sapiens GN=LAMP1 PE=1 SV=3	9237	cacoP7gpep1.11658.11658.2	controllerType=0 controllerNumber=1 scan=11658	37.8962
08776:2	3	R.LLNINPN[+1784.634]K.T	HexNAc(4)Hex(6)Fuc(0)NeuAc(0)	N[+1785]	1355.6	2	2710.2	2710.18	0	5.2	255	Specific	403.54	169.7	169.7	6	106	>sp|P11279|LAMP1_HUMAN Lysosome-associated membrane glycoprotein 1 OS=Homo sapiens GN=LAMP1 PE=1 SV=3	9237	cacoP7gpep1.8575.8575.2	controllerType=0 controllerNumber=1 scan=8575	27.412
12962:2	3	R.LLNINPN[+1872.651]K.T	HexNAc(3)Hex(6)Fuc(0)NeuAc(1)	N[+1873]	1399.61	2	2798.22	2798.2	0	7.2	255	Specific	404.37	161.17	161.17	5.92	106	>sp|P11279|LAMP1_HUMAN Lysosome-associated membrane glycoprotein 1 OS=Homo sapiens GN=LAMP1 PE=1 SV=3	9237	cacoP7gpep1.11884.11884.2	controllerType=0 controllerNumber=1 scan=11884	38.9168
08650:2	3	R.LLNINPN[+1581.555]K.T	HexNAc(3)Hex(6)Fuc(0)NeuAc(0)	N[+1582]	1254.06	2	2507.11	2507.1	0	2.8	255	Specific	407.45	255.78	255.78	6.2	106	>sp|P11279|LAMP1_HUMAN Lysosome-associated membrane glycoprotein 1 OS=Homo sapiens GN=LAMP1 PE=1 SV=3	9237	cacoP7gpep1.8479.8479.2	controllerType=0 controllerNumber=1 scan=8479	27.1509
08020:2	3	R.LLNINPN[+1864.634]K.T	HexNAc(2)Hex(9)Fuc(0)NeuAc(0)	N[+1865]	1395.61	2	2790.2	2790.18	0	8.1	255	Specific	410.14	183.47	183.47	5.96	106	>sp|P11279|LAMP1_HUMAN Lysosome-associated membrane glycoprotein 1 OS=Homo sapiens GN=LAMP1 PE=1 SV=3	9237	cacoP7gpep1.8007.8007.2	controllerType=0 controllerNumber=1 scan=8007	25.7295
08929:2	3	R.LLNINPN[+1727.613]K.T	HexNAc(3)Hex(6)Fuc(1)NeuAc(0)	N[+1728]	1327.1	2	2653.18	2653.16	0	8.9	255	Specific	419.18	279.54	279.54	5.71	106	>sp|P11279|LAMP1_HUMAN Lysosome-associated membrane glycoprotein 1 OS=Homo sapiens GN=LAMP1 PE=1 SV=3	9237	cacoP7gpep1.8697.8697.2	controllerType=0 controllerNumber=1 scan=8697	27.7671
13544:3	3	R.LLNINPN[+2627.947]K.T	HexNAc(6)Hex(6)Fuc(1)NeuAc(1)	N[+2628]	1185.18	3	3553.51	3553.49	0	5.1	255	Specific	424.56	207.07	207.07	6.02	106	>sp|P11279|LAMP1_HUMAN Lysosome-associated membrane glycoprotein 1 OS=Homo sapiens GN=LAMP1 PE=1 SV=3	9237	cacoP7gpep1.12337.12337.3	controllerType=0 controllerNumber=1 scan=12337	40.9905
08916:2	3	R.LLNINPN[+1216.423]K.T	HexNAc(2)Hex(5)Fuc(0)NeuAc(0)	N[+1216]	1071.49	2	2141.97	2141.97	0	0.2	255	Specific	426.65	176	176	6.13	106	>sp|P11279|LAMP1_HUMAN Lysosome-associated membrane glycoprotein 1 OS=Homo sapiens GN=LAMP1 PE=1 SV=3	9237	cacoP7gpep1.8686.8686.2	controllerType=0 controllerNumber=1 scan=8686	27.7382
08036:2	3	R.LLNINPN[+1864.634]K.T	HexNAc(2)Hex(9)Fuc(0)NeuAc(0)	N[+1865]	1395.6	2	2790.2	2790.18	0	6	255	Specific	431.42	172.14	172.14	6.14	106	>sp|P11279|LAMP1_HUMAN Lysosome-associated membrane glycoprotein 1 OS=Homo sapiens GN=LAMP1 PE=1 SV=3	9237	cacoP7gpep1.8018.8018.2	controllerType=0 controllerNumber=1 scan=8018	25.7599
08427:2	3	R.LLNINPN[+1378.476]K.T	HexNAc(2)Hex(6)Fuc(0)NeuAc(0)	N[+1378]	1152.52	2	2304.03	2304.02	0	4.7	255	Specific	432.23	186.53	186.53	6.23	106	>sp|P11279|LAMP1_HUMAN Lysosome-associated membrane glycoprotein 1 OS=Homo sapiens GN=LAMP1 PE=1 SV=3	9237	cacoP7gpep1.8317.8317.2	controllerType=0 controllerNumber=1 scan=8317	26.7017
08446:2	3	R.LLNINPN[+1540.529]K.T	HexNAc(2)Hex(7)Fuc(0)NeuAc(0)	N[+1541]	1233.54	2	2466.07	2466.07	0	-1.3	255	Specific	446.4	188.67	188.67	5.87	106	>sp|P11279|LAMP1_HUMAN Lysosome-associated membrane glycoprotein 1 OS=Homo sapiens GN=LAMP1 PE=1 SV=3	9237	cacoP7gpep1.8329.8329.2	controllerType=0 controllerNumber=1 scan=8329	26.7436
13569:3	3	R.LLNINPN[+2627.947]K.T	HexNAc(6)Hex(6)Fuc(1)NeuAc(1)	N[+2628]	1185.17	3	3553.51	3553.49	0	3.4	255	Specific	449.35	270.37	270.37	6.17	106	>sp|P11279|LAMP1_HUMAN Lysosome-associated membrane glycoprotein 1 OS=Homo sapiens GN=LAMP1 PE=1 SV=3	9237	cacoP7gpep1.12358.12358.3	controllerType=0 controllerNumber=1 scan=12358	41.0943
08185:2	3	R.LLNINPN[+1540.529]K.T	HexNAc(2)Hex(7)Fuc(0)NeuAc(0)	N[+1541]	1233.55	2	2466.09	2466.07	0	5.4	255	Specific	456.57	192.1	192.1	6.26	106	>sp|P11279|LAMP1_HUMAN Lysosome-associated membrane glycoprotein 1 OS=Homo sapiens GN=LAMP1 PE=1 SV=3	9237	cacoP7gpep1.8132.8132.2	controllerType=0 controllerNumber=1 scan=8132	26.1089
09460:2	3	R.LLNINPN[+1930.692]K.T	HexNAc(4)Hex(6)Fuc(1)NeuAc(0)	N[+1931]	1428.63	2	2856.26	2856.24	0	7.3	255	Specific	467.43	212.34	212.34	6.23	106	>sp|P11279|LAMP1_HUMAN Lysosome-associated membrane glycoprotein 1 OS=Homo sapiens GN=LAMP1 PE=1 SV=3	9237	cacoP7gpep1.9105.9105.2	controllerType=0 controllerNumber=1 scan=9105	28.8923
08062:2	3	R.LLNINPN[+1702.581]K.T	HexNAc(2)Hex(8)Fuc(0)NeuAc(0)	N[+1703]	1314.57	2	2628.14	2628.13	0	5.4	255	Specific	479.04	211	211	6.31	106	>sp|P11279|LAMP1_HUMAN Lysosome-associated membrane glycoprotein 1 OS=Homo sapiens GN=LAMP1 PE=1 SV=3	9237	cacoP7gpep1.8038.8038.2	controllerType=0 controllerNumber=1 scan=8038	25.8135
09863:2	3	R.LLNINPN[+1971.719]K.T	HexNAc(5)Hex(5)Fuc(1)NeuAc(0)	N[+1972]	1449.14	2	2897.28	2897.27	0	5.8	255	Specific	495.11	208.6	208.6	6.43	106	>sp|P11279|LAMP1_HUMAN Lysosome-associated membrane glycoprotein 1 OS=Homo sapiens GN=LAMP1 PE=1 SV=3	9237	cacoP7gpep1.9413.9413.2	controllerType=0 controllerNumber=1 scan=9413	29.9009
00772:2	3	K.AAN[+1540.529]GSLR.A	HexNAc(2)Hex(7)Fuc(0)NeuAc(0)	N[+1541]	1114.96	2	2228.91	2228.9	0	4.3	320	Specific	301.24	30.2	30.2	2.81	106	>sp|P11279|LAMP1_HUMAN Lysosome-associated membrane glycoprotein 1 OS=Homo sapiens GN=LAMP1 PE=1 SV=3	9237	cacoP7gpep1.2444.2444.2	controllerType=0 controllerNumber=1 scan=2444	10.0865
00752:2	3	K.AAN[+2026.687]GSLR.A	HexNAc(2)Hex(10)Fuc(0)NeuAc(0)	N[+2027]	1358.04	2	2715.08	2715.06	0	5.4	320	Specific	315.8	30.94	30.94	2.79	106	>sp|P11279|LAMP1_HUMAN Lysosome-associated membrane glycoprotein 1 OS=Homo sapiens GN=LAMP1 PE=1 SV=3	9237	cacoP7gpep1.2432.2432.2	controllerType=0 controllerNumber=1 scan=2432	10.0428
00736:2	3	K.AAN[+1864.634]GSLR.A	HexNAc(2)Hex(9)Fuc(0)NeuAc(0)	N[+1865]	1277.01	2	2553.01	2553.01	0	2	320	Specific	349.54	38.01	38.01	2.89	106	>sp|P11279|LAMP1_HUMAN Lysosome-associated membrane glycoprotein 1 OS=Homo sapiens GN=LAMP1 PE=1 SV=3	9237	cacoP7gpep1.2418.2418.2	controllerType=0 controllerNumber=1 scan=2418	9.9852
00750:2	3	K.AAN[+1702.581]GSLR.A	HexNAc(2)Hex(8)Fuc(0)NeuAc(0)	N[+1703]	1195.99	2	2390.96	2390.95	0	4.1	320	Specific	360.28	74.41	74.41	3.8	106	>sp|P11279|LAMP1_HUMAN Lysosome-associated membrane glycoprotein 1 OS=Homo sapiens GN=LAMP1 PE=1 SV=3	9237	cacoP7gpep1.2430.2430.2	controllerType=0 controllerNumber=1 scan=2430	10.0349
13701:4	4	K.VASVININPN[+2628.967]TTHSTGSC[+57.021]R.S	HexNAc(6)Hex(6)Fuc(3)NeuAc(0)	C[+57], N[+2629]	1165	4	4656.99	4656.96	0	7.3	248	Specific	149.58	107.93	107.93	2.7	51	>sp|P13473|LAMP2_HUMAN Lysosome-associated membrane glycoprotein 2 OS=Homo sapiens GN=LAMP2 PE=1 SV=2	9238	cacoP7gpep1.12453.12453.4	controllerType=0 controllerNumber=1 scan=12453	41.5345
11850:4	4	K.VASVININPN[+2611.952]TTHSTGSC[+57.021]R.S	HexNAc(6)Hex(5)Fuc(2)NeuAc(1)	C[+57], N[+2612]	1160.49	4	4638.95	4639.94	-1	2.4	248	Specific	213.34	157.64	20.34	3.07	51	>sp|P13473|LAMP2_HUMAN Lysosome-associated membrane glycoprotein 2 OS=Homo sapiens GN=LAMP2 PE=1 SV=2	9238	cacoP7gpep1.11040.11040.2	controllerType=0 controllerNumber=1 scan=11040	35.3975
16356:4	4	K.VASVININPN[+2919.042]TTHSTGSC[+57.021]R.S	HexNAc(6)Hex(6)Fuc(1)NeuAc(2)	C[+57], N[+2919]	1237.26	4	4946.03	4947.03	-1	-1.3	248	Specific	216.75	154.01	154.01	3.6	51	>sp|P13473|LAMP2_HUMAN Lysosome-associated membrane glycoprotein 2 OS=Homo sapiens GN=LAMP2 PE=1 SV=2	9238	cacoP7gpep1.14514.14514.4	controllerType=0 controllerNumber=1 scan=14514	51.787
13631:4	4	K.VASVININPN[+2627.947]TTHSTGSC[+57.021]R.S	HexNAc(6)Hex(6)Fuc(1)NeuAc(1)	C[+57], N[+2628]	1164.75	4	4655.98	4655.94	0	7.8	248	Specific	240.37	187.88	16.02	6.05	51	>sp|P13473|LAMP2_HUMAN Lysosome-associated membrane glycoprotein 2 OS=Homo sapiens GN=LAMP2 PE=1 SV=2	9238	cacoP7gpep1.12403.12403.4	controllerType=0 controllerNumber=1 scan=12403	41.3034
13530:4	4	K.VASVININPN[+2570.925]TTHSTGSC[+57.021]R.S	HexNAc(5)Hex(6)Fuc(2)NeuAc(1)	C[+57], N[+2571]	1150.49	4	4598.95	4598.92	0	6.1	248	Specific	244.2	178.76	17.68	5.15	51	>sp|P13473|LAMP2_HUMAN Lysosome-associated membrane glycoprotein 2 OS=Homo sapiens GN=LAMP2 PE=1 SV=2	9238	cacoP7gpep1.12326.12326.4	controllerType=0 controllerNumber=1 scan=12326	40.9362
11310:4	4	K.VASVININPN[+2774.004]TTHSTGSC[+57.021]R.S	HexNAc(6)Hex(6)Fuc(2)NeuAc(1)	C[+57], N[+2774]	1201	4	4800.99	4802	-1	-1	248	Specific	249.05	187.42	12.99	4.97	51	>sp|P13473|LAMP2_HUMAN Lysosome-associated membrane glycoprotein 2 OS=Homo sapiens GN=LAMP2 PE=1 SV=2	9238	cacoP7gpep1.10636.10636.2	controllerType=0 controllerNumber=1 scan=10636	33.8986
13705:4	4	K.VASVININPN[+2775.025]TTHSTGSC[+57.021]R.S	HexNAc(6)Hex(6)Fuc(4)NeuAc(0)	C[+57], N[+2775]	1201.75	4	4803.99	4803.02	1	-5.8	248	Specific	253.47	188.33	188.33	5.26	51	>sp|P13473|LAMP2_HUMAN Lysosome-associated membrane glycoprotein 2 OS=Homo sapiens GN=LAMP2 PE=1 SV=2	9238	cacoP7gpep1.12455.12455.4	controllerType=0 controllerNumber=1 scan=12455	41.5454
13843:3	4	K.VASVININPN[+1711.618]TTHSTGSC[+57.021]R.S	HexNAc(3)Hex(5)Fuc(2)NeuAc(0)	C[+57], N[+1712]	1247.2	3	3739.6	3739.61	0	-2.9	248	Specific	257.88	211.66	211.66	5.85	51	>sp|P13473|LAMP2_HUMAN Lysosome-associated membrane glycoprotein 2 OS=Homo sapiens GN=LAMP2 PE=1 SV=2	9238	cacoP7gpep1.12554.12554.3	controllerType=0 controllerNumber=1 scan=12554	42.0169
10785:4	4	K.VASVININPN[+2700.988]TTHSTGSC[+57.021]R.S	HexNAc(5)Hex(5)Fuc(4)NeuAc(1)	C[+57], N[+2701]	1183.25	4	4729.99	4728.98	1	1.9	248	Specific	272.17	246.48	17.03	6.19	51	>sp|P13473|LAMP2_HUMAN Lysosome-associated membrane glycoprotein 2 OS=Homo sapiens GN=LAMP2 PE=1 SV=2	9238	cacoP7gpep1.10172.10172.4	controllerType=0 controllerNumber=1 scan=10172	32.45
13704:4	4	K.VASVININPN[+2774.004]TTHSTGSC[+57.021]R.S	HexNAc(6)Hex(6)Fuc(2)NeuAc(1)	C[+57], N[+2774]	1201.27	4	4802.04	4802	0	8.6	248	Specific	272.75	195.85	17.49	5.65	51	>sp|P13473|LAMP2_HUMAN Lysosome-associated membrane glycoprotein 2 OS=Homo sapiens GN=LAMP2 PE=1 SV=2	9238	cacoP7gpep1.12455.12455.4	controllerType=0 controllerNumber=1 scan=12455	41.5454
11411:3	4	K.VASVININPN[+2628.967]TTHSTGSC[+57.021]R.S	HexNAc(6)Hex(6)Fuc(3)NeuAc(0)	C[+57], N[+2629]	1553.01	3	4657	4656.96	0	8.8	248	Specific	306.95	245.72	245.72	6.06	51	>sp|P13473|LAMP2_HUMAN Lysosome-associated membrane glycoprotein 2 OS=Homo sapiens GN=LAMP2 PE=1 SV=2	9238	cacoP7gpep1.10713.10713.3	controllerType=0 controllerNumber=1 scan=10713	34.1717
13504:4	4	K.VASVININPN[+2424.867]TTHSTGSC[+57.021]R.S	HexNAc(5)Hex(6)Fuc(1)NeuAc(1)	C[+57], N[+2425]	1113.73	4	4451.89	4452.86	-1	7	248	Specific	363.87	260.98	260.98	6.5	51	>sp|P13473|LAMP2_HUMAN Lysosome-associated membrane glycoprotein 2 OS=Homo sapiens GN=LAMP2 PE=1 SV=2	9238	cacoP7gpep1.12305.12305.4	controllerType=0 controllerNumber=1 scan=12305	40.8447
16196:4	4	K.VASVININPN[+2716.983]TTHSTGSC[+57.021]R.S	HexNAc(5)Hex(6)Fuc(3)NeuAc(1)	C[+57], N[+2717]	1186.75	4	4743.97	4744.98	-1	-0.2	248	Specific	391.26	340.7	11.52	6.87	51	>sp|P13473|LAMP2_HUMAN Lysosome-associated membrane glycoprotein 2 OS=Homo sapiens GN=LAMP2 PE=1 SV=2	9238	cacoP7gpep1.14390.14390.4	controllerType=0 controllerNumber=1 scan=14390	51.1645
13911:3	4	K.VASVININPN[+2775.025]TTHSTGSC[+57.021]R.S	HexNAc(6)Hex(6)Fuc(4)NeuAc(0)	C[+57], N[+2775]	1601.36	3	4802.06	4803.02	-1	9.3	248	Specific	403.26	359.89	359.89	6.83	51	>sp|P13473|LAMP2_HUMAN Lysosome-associated membrane glycoprotein 2 OS=Homo sapiens GN=LAMP2 PE=1 SV=2	9238	cacoP7gpep1.12604.12604.3	controllerType=0 controllerNumber=1 scan=12604	42.2606
13840:4	4	K.VASVININPN[+2774.004]TTHSTGSC[+57.021]R.S	HexNAc(6)Hex(6)Fuc(2)NeuAc(1)	C[+57], N[+2774]	1201.25	4	4801.99	4802	0	-0.7	248	Specific	403.52	316.49	17.83	6.55	51	>sp|P13473|LAMP2_HUMAN Lysosome-associated membrane glycoprotein 2 OS=Homo sapiens GN=LAMP2 PE=1 SV=2	9238	cacoP7gpep1.12551.12551.4	controllerType=0 controllerNumber=1 scan=12551	42.0011
11314:3	4	K.VASVININPN[+2117.777]TTHSTGSC[+57.021]R.S	HexNAc(5)Hex(5)Fuc(2)NeuAc(0)	C[+57], N[+2118]	1382.93	3	4146.78	4145.77	1	0.8	248	Specific	417.99	357.44	357.44	7.17	51	>sp|P13473|LAMP2_HUMAN Lysosome-associated membrane glycoprotein 2 OS=Homo sapiens GN=LAMP2 PE=1 SV=2	9238	cacoP7gpep1.10640.10640.3	controllerType=0 controllerNumber=1 scan=10640	33.9205
13865:3	4	K.VASVININPN[+1856.656]TTHSTGSC[+57.021]R.S	HexNAc(3)Hex(5)Fuc(1)NeuAc(1)	C[+57], N[+1857]	1295.56	3	3884.67	3884.65	0	4.3	248	Specific	436.63	343.74	343.74	7.37	51	>sp|P13473|LAMP2_HUMAN Lysosome-associated membrane glycoprotein 2 OS=Homo sapiens GN=LAMP2 PE=1 SV=2	9238	cacoP7gpep1.12569.12569.3	controllerType=0 controllerNumber=1 scan=12569	42.087
11489:3	4	K.VASVININPN[+2482.909]TTHSTGSC[+57.021]R.S	HexNAc(6)Hex(6)Fuc(2)NeuAc(0)	C[+57], N[+2483]	1504.31	3	4510.92	4510.9	0	3.2	248	Specific	444.84	324.78	12.05	7.41	51	>sp|P13473|LAMP2_HUMAN Lysosome-associated membrane glycoprotein 2 OS=Homo sapiens GN=LAMP2 PE=1 SV=2	9238	cacoP7gpep1.10776.10776.3	controllerType=0 controllerNumber=1 scan=10776	34.4102
11003:3	4	K.VASVININPN[+2133.772]TTHSTGSC[+57.021]R.S	HexNAc(5)Hex(6)Fuc(1)NeuAc(0)	C[+57], N[+2134]	1387.93	3	4161.78	4161.76	0	4	248	Specific	446.18	349.75	349.75	7.43	51	>sp|P13473|LAMP2_HUMAN Lysosome-associated membrane glycoprotein 2 OS=Homo sapiens GN=LAMP2 PE=1 SV=2	9238	cacoP7gpep1.10352.10352.3	controllerType=0 controllerNumber=1 scan=10352	33.0486
13696:3	4	K.VASVININPN[+2424.867]TTHSTGSC[+57.021]R.S	HexNAc(5)Hex(6)Fuc(1)NeuAc(1)	C[+57], N[+2425]	1484.97	3	4452.88	4452.86	0	5.6	248	Specific	464.34	387.98	19.85	8.86	51	>sp|P13473|LAMP2_HUMAN Lysosome-associated membrane glycoprotein 2 OS=Homo sapiens GN=LAMP2 PE=1 SV=2	9238	cacoP7gpep1.12450.12450.3	controllerType=0 controllerNumber=1 scan=12450	41.5195
14004:3	4	K.VASVININPN[+2627.947]TTHSTGSC[+57.021]R.S	HexNAc(6)Hex(6)Fuc(1)NeuAc(1)	C[+57], N[+2628]	1552.66	3	4655.97	4655.94	0	6	248	Specific	464.88	326.14	19.25	7.28	51	>sp|P13473|LAMP2_HUMAN Lysosome-associated membrane glycoprotein 2 OS=Homo sapiens GN=LAMP2 PE=1 SV=2	9238	cacoP7gpep1.12674.12674.3	controllerType=0 controllerNumber=1 scan=12674	42.5993
10938:3	4	K.VASVININPN[+1581.555]TTHSTGSC[+57.021]R.S	HexNAc(3)Hex(6)Fuc(0)NeuAc(0)	C[+57], N[+1582]	1203.86	3	3609.58	3609.55	0	8.5	248	Specific	464.96	334.36	334.36	6.82	51	>sp|P13473|LAMP2_HUMAN Lysosome-associated membrane glycoprotein 2 OS=Homo sapiens GN=LAMP2 PE=1 SV=2	9238	cacoP7gpep1.10301.10301.3	controllerType=0 controllerNumber=1 scan=10301	32.8733
13902:3	4	K.VASVININPN[+2774.004]TTHSTGSC[+57.021]R.S	HexNAc(6)Hex(6)Fuc(2)NeuAc(1)	C[+57], N[+2774]	1601.35	3	4802.04	4802	0	8	248	Specific	483.14	380.23	21.27	8.9	51	>sp|P13473|LAMP2_HUMAN Lysosome-associated membrane glycoprotein 2 OS=Homo sapiens GN=LAMP2 PE=1 SV=2	9238	cacoP7gpep1.12596.12596.3	controllerType=0 controllerNumber=1 scan=12596	42.2224
13881:4	4	K.VASVININPN[+2627.947]TTHSTGSC[+57.021]R.S	HexNAc(6)Hex(6)Fuc(1)NeuAc(1)	C[+57], N[+2628]	1164.5	4	4654.96	4655.94	-1	5.2	248	Specific	485.94	403.14	403.14	8.85	51	>sp|P13473|LAMP2_HUMAN Lysosome-associated membrane glycoprotein 2 OS=Homo sapiens GN=LAMP2 PE=1 SV=2	9238	cacoP7gpep1.12580.12580.4	controllerType=0 controllerNumber=1 scan=12580	42.1406
13714:3	4	K.VASVININPN[+1872.651]TTHSTGSC[+57.021]R.S	HexNAc(3)Hex(6)Fuc(0)NeuAc(1)	C[+57], N[+1873]	1300.89	3	3900.67	3900.64	0	6.2	248	Specific	501.22	395.57	395.57	8.86	51	>sp|P13473|LAMP2_HUMAN Lysosome-associated membrane glycoprotein 2 OS=Homo sapiens GN=LAMP2 PE=1 SV=2	9238	cacoP7gpep1.12462.12462.3	controllerType=0 controllerNumber=1 scan=12462	41.5764
13653:3	4	K.VASVININPN[+2424.867]TTHSTGSC[+57.021]R.S	HexNAc(5)Hex(6)Fuc(1)NeuAc(1)	C[+57], N[+2425]	1484.97	3	4452.89	4452.86	0	6.8	248	Specific	501.59	420.38	19.53	8.86	51	>sp|P13473|LAMP2_HUMAN Lysosome-associated membrane glycoprotein 2 OS=Homo sapiens GN=LAMP2 PE=1 SV=2	9238	cacoP7gpep1.12418.12418.3	controllerType=0 controllerNumber=1 scan=12418	41.3704
11312:3	4	K.VASVININPN[+2482.909]TTHSTGSC[+57.021]R.S	HexNAc(6)Hex(6)Fuc(2)NeuAc(0)	C[+57], N[+2483]	1503.98	3	4509.94	4510.9	-1	9.2	248	Specific	521.64	436.99	436.99	8.79	51	>sp|P13473|LAMP2_HUMAN Lysosome-associated membrane glycoprotein 2 OS=Homo sapiens GN=LAMP2 PE=1 SV=2	9238	cacoP7gpep1.10638.10638.3	controllerType=0 controllerNumber=1 scan=10638	33.9096
11328:3	4	K.VASVININPN[+1971.719]TTHSTGSC[+57.021]R.S	HexNAc(5)Hex(5)Fuc(1)NeuAc(0)	C[+57], N[+1972]	1333.92	3	3999.73	3999.71	0	5.2	248	Specific	528.25	414.21	414.21	9.13	51	>sp|P13473|LAMP2_HUMAN Lysosome-associated membrane glycoprotein 2 OS=Homo sapiens GN=LAMP2 PE=1 SV=2	9238	cacoP7gpep1.10654.10654.3	controllerType=0 controllerNumber=1 scan=10654	33.9683
10711:3	4	K.VASVININPN[+1540.529]TTHSTGSC[+57.021]R.S	HexNAc(2)Hex(7)Fuc(0)NeuAc(0)	C[+57], N[+1541]	1190.18	3	3568.53	3568.52	0	1.7	248	Specific	548.2	439.91	439.91	9.3	51	>sp|P13473|LAMP2_HUMAN Lysosome-associated membrane glycoprotein 2 OS=Homo sapiens GN=LAMP2 PE=1 SV=2	9238	cacoP7gpep1.10113.10113.3	controllerType=0 controllerNumber=1 scan=10113	32.2643
11352:3	4	K.VASVININPN[+2336.851]TTHSTGSC[+57.021]R.S	HexNAc(6)Hex(6)Fuc(1)NeuAc(0)	C[+57], N[+2337]	1455.63	3	4364.87	4364.84	0	6.3	248	Specific	568.08	485.42	485.42	9.19	51	>sp|P13473|LAMP2_HUMAN Lysosome-associated membrane glycoprotein 2 OS=Homo sapiens GN=LAMP2 PE=1 SV=2	9238	cacoP7gpep1.10672.10672.3	controllerType=0 controllerNumber=1 scan=10672	34.0268
10832:3	4	K.VASVININPN[+1378.476]TTHSTGSC[+57.021]R.S	HexNAc(2)Hex(6)Fuc(0)NeuAc(0)	C[+57], N[+1378]	1136.16	3	3406.48	3406.47	0	3.1	248	Specific	585.82	464.87	464.87	10.75	51	>sp|P13473|LAMP2_HUMAN Lysosome-associated membrane glycoprotein 2 OS=Homo sapiens GN=LAMP2 PE=1 SV=2	9238	cacoP7gpep1.10210.10210.3	controllerType=0 controllerNumber=1 scan=10210	32.5651
10654:3	4	K.VASVININPN[+1702.581]TTHSTGSC[+57.021]R.S	HexNAc(2)Hex(8)Fuc(0)NeuAc(0)	C[+57], N[+1703]	1244.21	3	3730.61	3730.57	0	9.5	248	Specific	597.82	516.66	516.66	9.97	51	>sp|P13473|LAMP2_HUMAN Lysosome-associated membrane glycoprotein 2 OS=Homo sapiens GN=LAMP2 PE=1 SV=2	9238	cacoP7gpep1.10068.10068.3	controllerType=0 controllerNumber=1 scan=10068	32.0845
10657:3	4	K.VASVININPN[+1702.581]TTHSTGSC[+57.021]R.S	HexNAc(2)Hex(8)Fuc(0)NeuAc(0)	C[+57], N[+1703]	1244.2	3	3730.58	3730.57	0	1.1	248	Specific	618.67	478.08	478.08	11.6	51	>sp|P13473|LAMP2_HUMAN Lysosome-associated membrane glycoprotein 2 OS=Homo sapiens GN=LAMP2 PE=1 SV=2	9238	cacoP7gpep1.10071.10071.3	controllerType=0 controllerNumber=1 scan=10071	32.0925
10750:3	4	K.VASVININPN[+1540.529]TTHSTGSC[+57.021]R.S	HexNAc(2)Hex(7)Fuc(0)NeuAc(0)	C[+57], N[+1541]	1190.18	3	3568.54	3568.52	0	4.6	248	Specific	660.75	507.92	507.92	12.66	51	>sp|P13473|LAMP2_HUMAN Lysosome-associated membrane glycoprotein 2 OS=Homo sapiens GN=LAMP2 PE=1 SV=2	9238	cacoP7gpep1.10145.10145.3	controllerType=0 controllerNumber=1 scan=10145	32.3631
10875:3	4	K.VASVININPN[+1378.476]TTHSTGSC[+57.021]R.S	HexNAc(2)Hex(6)Fuc(0)NeuAc(0)	C[+57], N[+1378]	1136.16	3	3406.48	3406.47	0	2.2	248	Specific	697.7	557.06	557.06	12.75	51	>sp|P13473|LAMP2_HUMAN Lysosome-associated membrane glycoprotein 2 OS=Homo sapiens GN=LAMP2 PE=1 SV=2	9238	cacoP7gpep1.10246.10246.3	controllerType=0 controllerNumber=1 scan=10246	32.6793
01924:2	4	R.LN[+1864.634]SSTIK.Y	HexNAc(2)Hex(9)Fuc(0)NeuAc(0)	N[+1865]	1314.05	2	2627.09	2627.07	0	6.5	274	Specific	310.49	26.03	26.03	2.62	51	>sp|P13473|LAMP2_HUMAN Lysosome-associated membrane glycoprotein 2 OS=Homo sapiens GN=LAMP2 PE=1 SV=2	9238	cacoP7gpep1.3380.3380.2	controllerType=0 controllerNumber=1 scan=3380	13.153
02372:2	4	R.LN[+1825.661]SSTIK.Y	HexNAc(5)Hex(5)Fuc(0)NeuAc(0)	N[+1826]	1294.56	2	2588.1	2588.1	0	2.7	274	Specific	333.82	48.92	48.92	3.33	51	>sp|P13473|LAMP2_HUMAN Lysosome-associated membrane glycoprotein 2 OS=Homo sapiens GN=LAMP2 PE=1 SV=2	9238	cacoP7gpep1.3743.3743.2	controllerType=0 controllerNumber=1 scan=3743	14.214
01956:2	4	R.LN[+1540.529]SSTIK.Y	HexNAc(2)Hex(7)Fuc(0)NeuAc(0)	N[+1541]	1151.99	2	2302.98	2302.96	0	5.2	274	Specific	344.31	57.1	57.1	3.18	51	>sp|P13473|LAMP2_HUMAN Lysosome-associated membrane glycoprotein 2 OS=Homo sapiens GN=LAMP2 PE=1 SV=2	9238	cacoP7gpep1.3405.3405.2	controllerType=0 controllerNumber=1 scan=3405	13.2238
09327:3	4	R.VQPFN[+2133.772]VTQGK.Y	HexNAc(5)Hex(6)Fuc(1)NeuAc(0)	N[+2134]	1084.47	3	3251.39	3251.37	0	5	352	Specific	172.96	71.66	71.66	2.59	51	>sp|P13473|LAMP2_HUMAN Lysosome-associated membrane glycoprotein 2 OS=Homo sapiens GN=LAMP2 PE=1 SV=2	9238	cacoP7gpep1.9008.9008.3	controllerType=0 controllerNumber=1 scan=9008	28.6307
17940:3	4	R.VQPFN[+2204.772]VTQGK.Y	HexNAc(4)Hex(5)Fuc(0)NeuAc(2)	N[+2205]	1108.13	3	3322.39	3322.37	0	4.7	352	Specific	229.89	128.1	128.1	5.13	51	>sp|P13473|LAMP2_HUMAN Lysosome-associated membrane glycoprotein 2 OS=Homo sapiens GN=LAMP2 PE=1 SV=2	9238	cacoP7gpep1.15725.15725.3	controllerType=0 controllerNumber=1 scan=15725	57.841
13021:3	4	R.VQPFN[+2425.887]VTQGK.Y	HexNAc(5)Hex(6)Fuc(3)NeuAc(0)	N[+2426]	1181.84	3	3543.5	3543.49	0	2.3	352	Specific	241.89	117.46	117.46	5.13	51	>sp|P13473|LAMP2_HUMAN Lysosome-associated membrane glycoprotein 2 OS=Homo sapiens GN=LAMP2 PE=1 SV=2	9238	cacoP7gpep1.11927.11927.3	controllerType=0 controllerNumber=1 scan=11927	39.1161
13506:3	4	R.VQPFN[+1913.677]VTQGK.Y	HexNAc(4)Hex(5)Fuc(0)NeuAc(1)	N[+1914]	1011.1	3	3031.29	3031.28	0	5.4	352	Specific	248.38	128.47	128.47	4.27	51	>sp|P13473|LAMP2_HUMAN Lysosome-associated membrane glycoprotein 2 OS=Homo sapiens GN=LAMP2 PE=1 SV=2	9238	cacoP7gpep1.12307.12307.3	controllerType=0 controllerNumber=1 scan=12307	40.8555
09569:3	4	R.VQPFN[+2481.889]VTQGK.Y	HexNAc(6)Hex(6)Fuc(0)NeuAc(1)	N[+2482]	1200.51	3	3599.52	3599.49	0	9	352	Specific	266.04	178.6	178.6	4.95	51	>sp|P13473|LAMP2_HUMAN Lysosome-associated membrane glycoprotein 2 OS=Homo sapiens GN=LAMP2 PE=1 SV=2	9238	cacoP7gpep1.9194.9194.3	controllerType=0 controllerNumber=1 scan=9194	29.1605
09635:3	4	R.VQPFN[+2336.851]VTQGK.Y	HexNAc(6)Hex(6)Fuc(1)NeuAc(0)	N[+2337]	1152.16	3	3454.45	3454.45	0	0.6	352	Specific	273.46	93.39	93.39	4.72	51	>sp|P13473|LAMP2_HUMAN Lysosome-associated membrane glycoprotein 2 OS=Homo sapiens GN=LAMP2 PE=1 SV=2	9238	cacoP7gpep1.9244.9244.3	controllerType=0 controllerNumber=1 scan=9244	29.3154
17339:3	4	R.VQPFN[+2569.905]VTQGK.Y	HexNAc(5)Hex(6)Fuc(0)NeuAc(2)	N[+2570]	1229.84	3	3687.52	3687.5	0	3.8	352	Specific	277.33	133.51	133.51	5.21	51	>sp|P13473|LAMP2_HUMAN Lysosome-associated membrane glycoprotein 2 OS=Homo sapiens GN=LAMP2 PE=1 SV=2	9238	cacoP7gpep1.15256.15256.3	controllerType=0 controllerNumber=1 scan=15256	55.4951
09583:3	4	R.VQPFN[+2482.909]VTQGK.Y	HexNAc(6)Hex(6)Fuc(2)NeuAc(0)	N[+2483]	1200.85	3	3600.54	3600.51	0	8.1	352	Specific	291.36	118.89	118.89	5	51	>sp|P13473|LAMP2_HUMAN Lysosome-associated membrane glycoprotein 2 OS=Homo sapiens GN=LAMP2 PE=1 SV=2	9238	cacoP7gpep1.9205.9205.3	controllerType=0 controllerNumber=1 scan=9205	29.1932
17203:3	4	R.VQPFN[+2715.963]VTQGK.Y	HexNAc(5)Hex(6)Fuc(1)NeuAc(2)	N[+2716]	1278.53	3	3833.59	3833.56	0	7.2	352	Specific	292.03	173.44	173.44	5.37	51	>sp|P13473|LAMP2_HUMAN Lysosome-associated membrane glycoprotein 2 OS=Homo sapiens GN=LAMP2 PE=1 SV=2	9238	cacoP7gpep1.15149.15149.3	controllerType=0 controllerNumber=1 scan=15149	54.9597
13517:3	4	R.VQPFN[+1913.677]VTQGK.Y	HexNAc(4)Hex(5)Fuc(0)NeuAc(1)	N[+1914]	1011.1	3	3031.28	3031.28	0	2.2	352	Specific	302.07	146.44	146.44	5.43	51	>sp|P13473|LAMP2_HUMAN Lysosome-associated membrane glycoprotein 2 OS=Homo sapiens GN=LAMP2 PE=1 SV=2	9238	cacoP7gpep1.12316.12316.3	controllerType=0 controllerNumber=1 scan=12316	40.8955
13487:3	4	R.VQPFN[+1710.598]VTQGK.Y	HexNAc(3)Hex(5)Fuc(0)NeuAc(1)	N[+1711]	943.405	3	2828.2	2828.2	0	0.8	352	Specific	325.63	149.58	149.58	5.52	51	>sp|P13473|LAMP2_HUMAN Lysosome-associated membrane glycoprotein 2 OS=Homo sapiens GN=LAMP2 PE=1 SV=2	9238	cacoP7gpep1.12293.12293.3	controllerType=0 controllerNumber=1 scan=12293	40.7891
13114:3	4	R.VQPFN[+2570.925]VTQGK.Y	HexNAc(5)Hex(6)Fuc(2)NeuAc(1)	N[+2571]	1230.18	3	3688.53	3688.53	0	1.8	352	Specific	353.55	191.2	191.2	5.8	51	>sp|P13473|LAMP2_HUMAN Lysosome-associated membrane glycoprotein 2 OS=Homo sapiens GN=LAMP2 PE=1 SV=2	9238	cacoP7gpep1.12003.12003.3	controllerType=0 controllerNumber=1 scan=12003	39.4616
17582:3	4	R.VQPFN[+2569.905]VTQGK.Y	HexNAc(5)Hex(6)Fuc(0)NeuAc(2)	N[+2570]	1229.85	3	3687.53	3687.5	0	7.6	352	Specific	359.61	230.39	230.39	5.65	51	>sp|P13473|LAMP2_HUMAN Lysosome-associated membrane glycoprotein 2 OS=Homo sapiens GN=LAMP2 PE=1 SV=2	9238	cacoP7gpep1.15448.15448.3	controllerType=0 controllerNumber=1 scan=15448	56.4545
13186:3	4	R.VQPFN[+1913.677]VTQGK.Y	HexNAc(4)Hex(5)Fuc(0)NeuAc(1)	N[+1914]	1011.1	3	3031.29	3031.28	0	5.2	352	Specific	376.18	198.55	198.55	5.81	51	>sp|P13473|LAMP2_HUMAN Lysosome-associated membrane glycoprotein 2 OS=Homo sapiens GN=LAMP2 PE=1 SV=2	9238	cacoP7gpep1.12057.12057.3	controllerType=0 controllerNumber=1 scan=12057	39.6989
08521:2	4	R.VQPFN[+1864.634]VTQGK.Y	HexNAc(2)Hex(9)Fuc(0)NeuAc(0)	N[+1865]	1491.63	2	2982.24	2982.23	0	3.2	352	Specific	397.28	239.87	239.87	6.08	51	>sp|P13473|LAMP2_HUMAN Lysosome-associated membrane glycoprotein 2 OS=Homo sapiens GN=LAMP2 PE=1 SV=2	9238	cacoP7gpep1.8385.8385.2	controllerType=0 controllerNumber=1 scan=8385	26.9111
13274:3	4	R.VQPFN[+2278.809]VTQGK.Y	HexNAc(5)Hex(6)Fuc(0)NeuAc(1)	N[+2279]	1132.81	3	3396.43	3396.41	0	5.4	352	Specific	415.32	179.67	179.67	5.75	51	>sp|P13473|LAMP2_HUMAN Lysosome-associated membrane glycoprotein 2 OS=Homo sapiens GN=LAMP2 PE=1 SV=2	9238	cacoP7gpep1.12127.12127.3	controllerType=0 controllerNumber=1 scan=12127	40.0078
13288:3	4	R.VQPFN[+1872.651]VTQGK.Y	HexNAc(3)Hex(6)Fuc(0)NeuAc(1)	N[+1873]	997.424	3	2990.26	2990.25	0	2.1	352	Specific	419.61	229.99	229.99	5.85	51	>sp|P13473|LAMP2_HUMAN Lysosome-associated membrane glycoprotein 2 OS=Homo sapiens GN=LAMP2 PE=1 SV=2	9238	cacoP7gpep1.12139.12139.3	controllerType=0 controllerNumber=1 scan=12139	40.0621
13536:2	4	R.VQPFN[+1710.598]VTQGK.Y	HexNAc(3)Hex(5)Fuc(0)NeuAc(1)	N[+1711]	1414.61	2	2828.22	2828.2	0	7.5	352	Specific	442.13	193.96	193.96	6.18	51	>sp|P13473|LAMP2_HUMAN Lysosome-associated membrane glycoprotein 2 OS=Homo sapiens GN=LAMP2 PE=1 SV=2	9238	cacoP7gpep1.12330.12330.2	controllerType=0 controllerNumber=1 scan=12330	40.9571
16977:3	4	R.VQPFN[+2715.963]VTQGK.Y	HexNAc(5)Hex(6)Fuc(1)NeuAc(2)	N[+2716]	1278.53	3	3833.57	3833.56	0	2.9	352	Specific	451.86	265.42	265.42	6.28	51	>sp|P13473|LAMP2_HUMAN Lysosome-associated membrane glycoprotein 2 OS=Homo sapiens GN=LAMP2 PE=1 SV=2	9238	cacoP7gpep1.14981.14981.3	controllerType=0 controllerNumber=1 scan=14981	54.1207
13299:3	4	R.VQPFN[+1710.598]VTQGK.Y	HexNAc(3)Hex(5)Fuc(0)NeuAc(1)	N[+1711]	943.407	3	2828.21	2828.2	0	3	352	Specific	471.74	253.4	253.4	6.19	51	>sp|P13473|LAMP2_HUMAN Lysosome-associated membrane glycoprotein 2 OS=Homo sapiens GN=LAMP2 PE=1 SV=2	9238	cacoP7gpep1.12148.12148.3	controllerType=0 controllerNumber=1 scan=12148	40.1026
13344:2	4	R.VQPFN[+1872.651]VTQGK.Y	HexNAc(3)Hex(6)Fuc(0)NeuAc(1)	N[+1873]	1495.64	2	2990.26	2990.25	0	4.9	352	Specific	479.2	228.43	228.43	6.31	51	>sp|P13473|LAMP2_HUMAN Lysosome-associated membrane glycoprotein 2 OS=Homo sapiens GN=LAMP2 PE=1 SV=2	9238	cacoP7gpep1.12183.12183.2	controllerType=0 controllerNumber=1 scan=12183	40.2714
13089:3	4	R.VQPFN[+1872.651]VTQGK.Y	HexNAc(3)Hex(6)Fuc(0)NeuAc(1)	N[+1873]	997.424	3	2990.26	2990.25	0	2.2	352	Specific	491.15	258.3	258.3	6.31	51	>sp|P13473|LAMP2_HUMAN Lysosome-associated membrane glycoprotein 2 OS=Homo sapiens GN=LAMP2 PE=1 SV=2	9238	cacoP7gpep1.11984.11984.3	controllerType=0 controllerNumber=1 scan=11984	39.3823
08509:2	4	R.VQPFN[+1702.581]VTQGK.Y	HexNAc(2)Hex(8)Fuc(0)NeuAc(0)	N[+1703]	1410.6	2	2820.2	2820.18	0	5.9	352	Specific	505.36	258.95	258.95	6.44	51	>sp|P13473|LAMP2_HUMAN Lysosome-associated membrane glycoprotein 2 OS=Homo sapiens GN=LAMP2 PE=1 SV=2	9238	cacoP7gpep1.8377.8377.2	controllerType=0 controllerNumber=1 scan=8377	26.8817
08889:2	4	R.VQPFN[+1378.476]VTQGK.Y	HexNAc(2)Hex(6)Fuc(0)NeuAc(0)	N[+1378]	1248.54	2	2496.08	2496.08	0	2.2	352	Specific	511.08	237.02	237.02	6.56	51	>sp|P13473|LAMP2_HUMAN Lysosome-associated membrane glycoprotein 2 OS=Homo sapiens GN=LAMP2 PE=1 SV=2	9238	cacoP7gpep1.8663.8663.2	controllerType=0 controllerNumber=1 scan=8663	27.6709
08627:2	4	R.VQPFN[+1540.529]VTQGK.Y	HexNAc(2)Hex(7)Fuc(0)NeuAc(0)	N[+1541]	1329.58	2	2658.14	2658.13	0	6	352	Specific	511.2	262.51	262.51	6.55	51	>sp|P13473|LAMP2_HUMAN Lysosome-associated membrane glycoprotein 2 OS=Homo sapiens GN=LAMP2 PE=1 SV=2	9238	cacoP7gpep1.8464.8464.2	controllerType=0 controllerNumber=1 scan=8464	27.1175
08615:2	4	R.VQPFN[+1540.529]VTQGK.Y	HexNAc(2)Hex(7)Fuc(0)NeuAc(0)	N[+1541]	1329.58	2	2658.15	2658.13	0	6.7	352	Specific	563.75	311.95	311.95	6.89	51	>sp|P13473|LAMP2_HUMAN Lysosome-associated membrane glycoprotein 2 OS=Homo sapiens GN=LAMP2 PE=1 SV=2	9238	cacoP7gpep1.8453.8453.2	controllerType=0 controllerNumber=1 scan=8453	27.0892
12992:4	5	K.AN[+1784.634]TTQPGIVEGGQVLK.C	HexNAc(4)Hex(6)Fuc(0)NeuAc(0)	N[+1785]	849.886	4	3396.52	3396.5	0	5	73	Specific	187.48	187.48	187.48	2.81	16	>sp|P06756|ITAV_HUMAN Integrin alpha-V OS=Homo sapiens GN=ITGAV PE=1 SV=2	8368	cacoP7gpep1.11904.11904.4	controllerType=0 controllerNumber=1 scan=11904	39.0088
13174:4	5	K.AN[+1971.719]TTQPGIVEGGQVLK.C	HexNAc(5)Hex(5)Fuc(1)NeuAc(0)	N[+1972]	896.652	4	3583.59	3583.59	0	-0.3	73	Specific	236.37	67.1	67.1	4.5	16	>sp|P06756|ITAV_HUMAN Integrin alpha-V OS=Homo sapiens GN=ITGAV PE=1 SV=2	8368	cacoP7gpep1.12047.12047.4	controllerType=0 controllerNumber=1 scan=12047	39.6559
13007:3	5	K.AN[+1622.582]TTQPGIVEGGQVLK.C	HexNAc(4)Hex(5)Fuc(0)NeuAc(0)	N[+1623]	1078.82	3	3234.45	3234.45	0	0.9	73	Specific	267.34	179.74	179.74	6.05	16	>sp|P06756|ITAV_HUMAN Integrin alpha-V OS=Homo sapiens GN=ITGAV PE=1 SV=2	8368	cacoP7gpep1.11916.11916.4	controllerType=0 controllerNumber=1 scan=11916	39.0641
13318:3	5	K.AN[+1606.587]TTQPGIVEGGQVLK.C	HexNAc(4)Hex(4)Fuc(1)NeuAc(0)	N[+1607]	1073.48	3	3218.43	3218.46	0	-7.1	73	Specific	305.38	184.29	184.29	5.35	16	>sp|P06756|ITAV_HUMAN Integrin alpha-V OS=Homo sapiens GN=ITGAV PE=1 SV=2	8368	cacoP7gpep1.12163.12163.3	controllerType=0 controllerNumber=1 scan=12163	40.175
13192:3	5	K.AN[+1809.666]TTQPGIVEGGQVLK.C	HexNAc(5)Hex(4)Fuc(1)NeuAc(0)	N[+1810]	1141.18	3	3421.54	3421.54	0	0.1	73	Specific	352.59	173.26	173.26	6.16	16	>sp|P06756|ITAV_HUMAN Integrin alpha-V OS=Homo sapiens GN=ITGAV PE=1 SV=2	8368	cacoP7gpep1.12062.12062.3	controllerType=0 controllerNumber=1 scan=12062	39.7224
12854:3	5	K.AN[+1581.555]TTQPGIVEGGQVLK.C	HexNAc(3)Hex(6)Fuc(0)NeuAc(0)	N[+1582]	1065.15	3	3193.43	3193.43	0	1.2	73	Specific	401.24	244.27	244.27	6.53	16	>sp|P06756|ITAV_HUMAN Integrin alpha-V OS=Homo sapiens GN=ITGAV PE=1 SV=2	8368	cacoP7gpep1.11803.11803.3	controllerType=0 controllerNumber=1 scan=11803	38.5375
13059:4	5	K.AN[+1930.692]TTQPGIVEGGQVLK.C	HexNAc(4)Hex(6)Fuc(1)NeuAc(0)	N[+1931]	886.4	4	3542.58	3542.56	0	4	73	Specific	404.51	270.69	270.69	6.19	16	>sp|P06756|ITAV_HUMAN Integrin alpha-V OS=Homo sapiens GN=ITGAV PE=1 SV=2	8368	cacoP7gpep1.11961.11961.4	controllerType=0 controllerNumber=1 scan=11961	39.2796
13030:4	5	K.AN[+1930.692]TTQPGIVEGGQVLK.C	HexNAc(4)Hex(6)Fuc(1)NeuAc(0)	N[+1931]	886.401	4	3542.58	3542.56	0	5.3	73	Specific	416.43	192.06	192.06	6.04	16	>sp|P06756|ITAV_HUMAN Integrin alpha-V OS=Homo sapiens GN=ITGAV PE=1 SV=2	8368	cacoP7gpep1.11938.11938.4	controllerType=0 controllerNumber=1 scan=11938	39.1704
13029:3	5	K.AN[+1930.692]TTQPGIVEGGQVLK.C	HexNAc(4)Hex(6)Fuc(1)NeuAc(0)	N[+1931]	1181.53	3	3542.59	3542.56	0	7.6	73	Specific	518.12	326.41	326.41	7.11	16	>sp|P06756|ITAV_HUMAN Integrin alpha-V OS=Homo sapiens GN=ITGAV PE=1 SV=2	8368	cacoP7gpep1.11937.11937.3	controllerType=0 controllerNumber=1 scan=11937	39.165
13032:3	5	K.AN[+1622.582]TTQPGIVEGGQVLK.C	HexNAc(4)Hex(5)Fuc(0)NeuAc(0)	N[+1623]	1078.82	3	3234.44	3234.45	0	-2.6	73	Specific	542.76	318.03	318.03	6.74	16	>sp|P06756|ITAV_HUMAN Integrin alpha-V OS=Homo sapiens GN=ITGAV PE=1 SV=2	8368	cacoP7gpep1.11941.11941.3	controllerType=0 controllerNumber=1 scan=11941	39.1825
12850:3	5	K.AN[+1784.634]TTQPGIVEGGQVLK.C	HexNAc(4)Hex(6)Fuc(0)NeuAc(0)	N[+1785]	1132.84	3	3396.52	3396.5	0	4.4	73	Specific	592.99	340.92	340.92	8.96	16	>sp|P06756|ITAV_HUMAN Integrin alpha-V OS=Homo sapiens GN=ITGAV PE=1 SV=2	8368	cacoP7gpep1.11801.11801.3	controllerType=0 controllerNumber=1 scan=11801	38.5271
13093:3	5	K.AN[+1971.719]TTQPGIVEGGQVLK.C	HexNAc(5)Hex(5)Fuc(1)NeuAc(0)	N[+1972]	1195.2	3	3583.6	3583.59	0	3	73	Specific	596.42	334.05	334.05	8.92	16	>sp|P06756|ITAV_HUMAN Integrin alpha-V OS=Homo sapiens GN=ITGAV PE=1 SV=2	8368	cacoP7gpep1.11987.11987.3	controllerType=0 controllerNumber=1 scan=11987	39.395
13074:3	5	K.AN[+1565.560]TTQPGIVEGGQVLK.C	HexNAc(3)Hex(5)Fuc(1)NeuAc(0)	N[+1566]	1059.82	3	3177.44	3177.43	0	2.2	73	Specific	616.04	423.9	423.9	11.5	16	>sp|P06756|ITAV_HUMAN Integrin alpha-V OS=Homo sapiens GN=ITGAV PE=1 SV=2	8368	cacoP7gpep1.11973.11973.3	controllerType=0 controllerNumber=1 scan=11973	39.3309
12979:3	5	K.AN[+1216.423]TTQPGIVEGGQVLK.C	HexNAc(2)Hex(5)Fuc(0)NeuAc(0)	N[+1216]	943.438	3	2828.3	2828.29	0	2.3	73	Specific	649.77	424.08	424.08	11.5	16	>sp|P06756|ITAV_HUMAN Integrin alpha-V OS=Homo sapiens GN=ITGAV PE=1 SV=2	8368	cacoP7gpep1.11895.11895.3	controllerType=0 controllerNumber=1 scan=11895	38.9666
13229:3	5	K.AN[+1809.666]TTQPGIVEGGQVLK.C	HexNAc(5)Hex(4)Fuc(1)NeuAc(0)	N[+1810]	1141.19	3	3421.54	3421.54	0	2.4	73	Specific	679.95	368.72	368.72	11.21	16	>sp|P06756|ITAV_HUMAN Integrin alpha-V OS=Homo sapiens GN=ITGAV PE=1 SV=2	8368	cacoP7gpep1.12093.12093.3	controllerType=0 controllerNumber=1 scan=12093	39.8497
13106:3	5	K.AN[+1971.719]TTQPGIVEGGQVLK.C	HexNAc(5)Hex(5)Fuc(1)NeuAc(0)	N[+1972]	1195.21	3	3583.6	3583.59	0	4.4	73	Specific	687.84	421.66	421.66	12.41	16	>sp|P06756|ITAV_HUMAN Integrin alpha-V OS=Homo sapiens GN=ITGAV PE=1 SV=2	8368	cacoP7gpep1.11998.11998.3	controllerType=0 controllerNumber=1 scan=11998	39.4413
12723:3	5	K.AN[+1540.529]TTQPGIVEGGQVLK.C	HexNAc(2)Hex(7)Fuc(0)NeuAc(0)	N[+1541]	1051.47	3	3152.4	3152.4	0	1.3	73	Specific	692.06	503.42	503.42	12.43	16	>sp|P06756|ITAV_HUMAN Integrin alpha-V OS=Homo sapiens GN=ITGAV PE=1 SV=2	8368	cacoP7gpep1.11709.11709.3	controllerType=0 controllerNumber=1 scan=11709	38.1218
12841:3	5	K.AN[+1378.476]TTQPGIVEGGQVLK.C	HexNAc(2)Hex(6)Fuc(0)NeuAc(0)	N[+1378]	997.457	3	2990.36	2990.35	0	4	73	Specific	715.73	620.55	620.55	13.39	16	>sp|P06756|ITAV_HUMAN Integrin alpha-V OS=Homo sapiens GN=ITGAV PE=1 SV=2	8368	cacoP7gpep1.11792.11792.3	controllerType=0 controllerNumber=1 scan=11792	38.4847
13058:3	5	K.AN[+1930.692]TTQPGIVEGGQVLK.C	HexNAc(4)Hex(6)Fuc(1)NeuAc(0)	N[+1931]	1181.53	3	3542.59	3542.56	0	7.1	73	Specific	730.63	585.24	585.24	13.21	16	>sp|P06756|ITAV_HUMAN Integrin alpha-V OS=Homo sapiens GN=ITGAV PE=1 SV=2	8368	cacoP7gpep1.11960.11960.3	controllerType=0 controllerNumber=1 scan=11960	39.2771
13121:3	5	K.AN[+1768.640]TTQPGIVEGGQVLK.C	HexNAc(4)Hex(5)Fuc(1)NeuAc(0)	N[+1769]	1127.51	3	3380.52	3380.51	0	3.8	73	Specific	788.9	538.91	538.91	14.39	16	>sp|P06756|ITAV_HUMAN Integrin alpha-V OS=Homo sapiens GN=ITGAV PE=1 SV=2	8368	cacoP7gpep1.12009.12009.3	controllerType=0 controllerNumber=1 scan=12009	39.4851
12611:3	5	K.AN[+1702.581]TTQPGIVEGGQVLK.C	HexNAc(2)Hex(8)Fuc(0)NeuAc(0)	N[+1703]	1105.49	3	3314.46	3314.45	0	2.4	73	Specific	850.6	761.49	761.49	16.5	16	>sp|P06756|ITAV_HUMAN Integrin alpha-V OS=Homo sapiens GN=ITGAV PE=1 SV=2	8368	cacoP7gpep1.11616.11616.3	controllerType=0 controllerNumber=1 scan=11616	37.7362
05868:3	5	K.ISSLQTTEKN[+1702.581]DTVAGQGER.D	HexNAc(2)Hex(8)Fuc(0)NeuAc(0)	N[+1703]	1246.21	3	3736.61	3736.59	0	4.9	865	Specific	654.53	548.57	548.57	12.67	16	>sp|P06756|ITAV_HUMAN Integrin alpha-V OS=Homo sapiens GN=ITGAV PE=1 SV=2	8368	cacoP7gpep1.6373.6373.3	controllerType=0 controllerNumber=1 scan=6373	21.5109
01805:3	5	K.ENQN[+1702.581]HSYSLK.S	HexNAc(2)Hex(8)Fuc(0)NeuAc(0)	N[+1703]	974.723	3	2922.16	2922.15	0	1.2	942	Specific	278.29	105.03	105.03	5.2	16	>sp|P06756|ITAV_HUMAN Integrin alpha-V OS=Homo sapiens GN=ITGAV PE=1 SV=2	8368	cacoP7gpep1.3286.3286.3	controllerType=0 controllerNumber=1 scan=3286	12.8744
18793:4	6	R.DC[+57.021]PDGADENDC[+57.021]QYPTC[+57.021]EQLTC[+57.021]DNGAC[+57.021]YN[+1702.581]TSQK.C	HexNAc(2)Hex(8)Fuc(0)NeuAc(0)	C[+57]*5, N[+1703]	1373.24	4	5489.96	5488.98	1	-4.8	132	Specific	129.64	129.64	129.64	3.95	61	>sp|P98164|LRP2_HUMAN Low-density lipoprotein receptor-related protein 2 OS=Homo sapiens GN=LRP2 PE=1 SV=3	9663	cacoP7gpep1.16385.16385.4	controllerType=0 controllerNumber=1 scan=16385	61.1472
18151:4	6	R.DC[+57.021]PDGADENDC[+57.021]QYPTC[+57.021]EQLTC[+57.021]DNGAC[+57.021]YN[+1864.634]TSQK.C	HexNAc(2)Hex(9)Fuc(0)NeuAc(0)	C[+57]*5, N[+1865]	1413.52	4	5651.04	5651.03	0	1.8	132	Specific	181.98	181.98	181.98	5.02	61	>sp|P98164|LRP2_HUMAN Low-density lipoprotein receptor-related protein 2 OS=Homo sapiens GN=LRP2 PE=1 SV=3	9663	cacoP7gpep1.15890.15890.4	controllerType=0 controllerNumber=1 scan=15890	58.6622
13606:4	6	K.VC[+57.021]DGILDC[+57.021]PGREDEN[+2774.004]NTSTGK.Y	HexNAc(6)Hex(6)Fuc(2)NeuAc(1)	C[+57]*2, N[+2774]	1278.27	4	5110.04	5111.01	-1	5.9	285	Specific	316.11	160.09	11.84	6.62	61	>sp|P98164|LRP2_HUMAN Low-density lipoprotein receptor-related protein 2 OS=Homo sapiens GN=LRP2 PE=1 SV=3	9663	cacoP7gpep1.12383.12383.4	controllerType=0 controllerNumber=1 scan=12383	41.2082
10461:3	6	K.VC[+57.021]DGILDC[+57.021]PGREDEN[+1540.529]NTSTGK.Y	HexNAc(2)Hex(7)Fuc(0)NeuAc(0)	C[+57]*2, N[+1541]	1293.19	3	3877.56	3877.54	0	5.8	285	Specific	400.55	332.32	12.55	7.34	61	>sp|P98164|LRP2_HUMAN Low-density lipoprotein receptor-related protein 2 OS=Homo sapiens GN=LRP2 PE=1 SV=3	9663	cacoP7gpep1.9896.9896.3	controllerType=0 controllerNumber=1 scan=9896	31.4822
10429:3	6	K.VC[+57.021]DGILDC[+57.021]PGREDEN[+1540.529]NTSTGK.Y	HexNAc(2)Hex(7)Fuc(0)NeuAc(0)	C[+57]*2, N[+1541]	1293.19	3	3877.56	3877.54	0	5.1	285	Specific	421.39	380.32	10.33	9.12	61	>sp|P98164|LRP2_HUMAN Low-density lipoprotein receptor-related protein 2 OS=Homo sapiens GN=LRP2 PE=1 SV=3	9663	cacoP7gpep1.9868.9868.3	controllerType=0 controllerNumber=1 scan=9868	31.3829
10443:3	6	K.VC[+57.021]DGILDC[+57.021]PGREDEN[+1540.529]NTSTGK.Y	HexNAc(2)Hex(7)Fuc(0)NeuAc(0)	C[+57]*2, N[+1541]	1293.19	3	3877.55	3877.54	0	3.4	285	Specific	457.66	340.96	12.09	7.72	61	>sp|P98164|LRP2_HUMAN Low-density lipoprotein receptor-related protein 2 OS=Homo sapiens GN=LRP2 PE=1 SV=3	9663	cacoP7gpep1.9879.9879.3	controllerType=0 controllerNumber=1 scan=9879	31.4223
10313:3	6	K.VC[+57.021]DGILDC[+57.021]PGREDEN[+1702.581]NTSTGK.Y	HexNAc(2)Hex(8)Fuc(0)NeuAc(0)	C[+57]*2, N[+1703]	1347.21	3	4039.62	4039.59	0	7.6	285	Specific	505.08	435.49	11.97	9.23	61	>sp|P98164|LRP2_HUMAN Low-density lipoprotein receptor-related protein 2 OS=Homo sapiens GN=LRP2 PE=1 SV=3	9663	cacoP7gpep1.9766.9766.3	controllerType=0 controllerNumber=1 scan=9766	31.048
10318:3	6	K.VC[+57.021]DGILDC[+57.021]PGREDEN[+1702.581]NTSTGK.Y	HexNAc(2)Hex(8)Fuc(0)NeuAc(0)	C[+57]*2, N[+1703]	1347.2	3	4039.6	4039.59	0	1.9	285	Specific	552.67	456.53	12.54	9.6	61	>sp|P98164|LRP2_HUMAN Low-density lipoprotein receptor-related protein 2 OS=Homo sapiens GN=LRP2 PE=1 SV=3	9663	cacoP7gpep1.9772.9772.3	controllerType=0 controllerNumber=1 scan=9772	31.0656
23044:4	6	K.AN[+2262.814]DSFGEASIIFSNGR.D	HexNAc(5)Hex(5)Fuc(1)NeuAc(1)	N[+2263]	987.659	4	3947.61	3947.61	0	2	387	Specific	68.89	44.59	44.59	2.47	61	>sp|P98164|LRP2_HUMAN Low-density lipoprotein receptor-related protein 2 OS=Homo sapiens GN=LRP2 PE=1 SV=3	9663	cacoP7gpep1.21893.21893.4	controllerType=0 controllerNumber=1 scan=21893	85.1296
23052:4	6	K.AN[+2262.814]DSFGEASIIFSNGR.D	HexNAc(5)Hex(5)Fuc(1)NeuAc(1)	N[+2263]	987.661	4	3947.62	3947.61	0	3.6	387	Specific	197.1	157.58	157.58	3.41	61	>sp|P98164|LRP2_HUMAN Low-density lipoprotein receptor-related protein 2 OS=Homo sapiens GN=LRP2 PE=1 SV=3	9663	cacoP7gpep1.21931.21931.4	controllerType=0 controllerNumber=1 scan=21931	85.2857
20782:3	6	K.AN[+1971.719]DSFGEASIIFSNGR.D	HexNAc(5)Hex(5)Fuc(1)NeuAc(0)	N[+1972]	1219.51	3	3656.51	3656.51	0	-0.9	387	Specific	237.92	139.73	139.73	5.35	61	>sp|P98164|LRP2_HUMAN Low-density lipoprotein receptor-related protein 2 OS=Homo sapiens GN=LRP2 PE=1 SV=3	9663	cacoP7gpep1.18262.18262.3	controllerType=0 controllerNumber=1 scan=18262	69.6687
20705:3	6	K.AN[+1864.634]DSFGEASIIFSNGR.D	HexNAc(2)Hex(9)Fuc(0)NeuAc(0)	N[+1865]	1183.82	3	3549.43	3549.43	0	1.7	387	Specific	330.73	221.11	221.11	6.46	61	>sp|P98164|LRP2_HUMAN Low-density lipoprotein receptor-related protein 2 OS=Homo sapiens GN=LRP2 PE=1 SV=3	9663	cacoP7gpep1.18180.18180.3	controllerType=0 controllerNumber=1 scan=18180	69.3141
20643:3	6	K.AN[+1702.581]DSFGEASIIFSNGR.D	HexNAc(2)Hex(8)Fuc(0)NeuAc(0)	N[+1703]	1129.8	3	3387.38	3387.37	0	1.1	387	Specific	350.49	252.38	252.38	6.4	61	>sp|P98164|LRP2_HUMAN Low-density lipoprotein receptor-related protein 2 OS=Homo sapiens GN=LRP2 PE=1 SV=3	9663	cacoP7gpep1.18122.18122.3	controllerType=0 controllerNumber=1 scan=18122	69.0666
20594:3	6	K.AN[+1864.634]DSFGEASIIFSNGR.D	HexNAc(2)Hex(9)Fuc(0)NeuAc(0)	N[+1865]	1183.82	3	3549.44	3549.43	0	4.3	387	Specific	363.22	196.61	196.61	6.47	61	>sp|P98164|LRP2_HUMAN Low-density lipoprotein receptor-related protein 2 OS=Homo sapiens GN=LRP2 PE=1 SV=3	9663	cacoP7gpep1.18066.18066.3	controllerType=0 controllerNumber=1 scan=18066	68.8343
02724:2	6	K.N[+1971.719]LTNPR.G	HexNAc(5)Hex(5)Fuc(1)NeuAc(0)	N[+1972]	1343.56	2	2686.11	2686.11	0	1.9	1550	Specific	225.73	32.52	32.52	2.6	61	>sp|P98164|LRP2_HUMAN Low-density lipoprotein receptor-related protein 2 OS=Homo sapiens GN=LRP2 PE=1 SV=3	9663	cacoP7gpep1.4027.4027.2	controllerType=0 controllerNumber=1 scan=4027	15.081
02783:2	6	K.N[+1971.719]LTNPR.G	HexNAc(5)Hex(5)Fuc(1)NeuAc(0)	N[+1972]	1343.57	2	2686.12	2686.11	0	5.5	1550	Specific	234.33	24.56	24.56	2.51	61	>sp|P98164|LRP2_HUMAN Low-density lipoprotein receptor-related protein 2 OS=Homo sapiens GN=LRP2 PE=1 SV=3	9663	cacoP7gpep1.4074.4074.2	controllerType=0 controllerNumber=1 scan=4074	15.2232
01665:2	6	K.N[+1702.581]LTNPR.G	HexNAc(2)Hex(8)Fuc(0)NeuAc(0)	N[+1703]	1208.99	2	2416.98	2416.97	0	3.2	1550	Specific	339.78	36.99	36.99	2.88	61	>sp|P98164|LRP2_HUMAN Low-density lipoprotein receptor-related protein 2 OS=Homo sapiens GN=LRP2 PE=1 SV=3	9663	cacoP7gpep1.3161.3161.2	controllerType=0 controllerNumber=1 scan=3161	12.4814
01635:2	6	K.N[+1864.634]LTNPR.G	HexNAc(2)Hex(9)Fuc(0)NeuAc(0)	N[+1865]	1290.02	2	2579.03	2579.02	0	3.7	1550	Specific	373.29	37.32	37.32	2.88	61	>sp|P98164|LRP2_HUMAN Low-density lipoprotein receptor-related protein 2 OS=Homo sapiens GN=LRP2 PE=1 SV=3	9663	cacoP7gpep1.3137.3137.2	controllerType=0 controllerNumber=1 scan=3137	12.4088
02458:2	6	R.IN[+1702.581]TTYR.R	HexNAc(2)Hex(8)Fuc(0)NeuAc(0)	N[+1703]	1235.5	2	2469.99	2469.99	0	0.3	2176	Specific	312.54	49.79	49.79	2.96	61	>sp|P98164|LRP2_HUMAN Low-density lipoprotein receptor-related protein 2 OS=Homo sapiens GN=LRP2 PE=1 SV=3	9663	cacoP7gpep1.3816.3816.2	controllerType=0 controllerNumber=1 scan=3816	14.4551
02444:2	6	R.IN[+1864.634]TTYR.R	HexNAc(2)Hex(9)Fuc(0)NeuAc(0)	N[+1865]	1316.53	2	2632.05	2632.04	0	4.7	2176	Specific	323.16	50.87	50.87	3.2	61	>sp|P98164|LRP2_HUMAN Low-density lipoprotein receptor-related protein 2 OS=Homo sapiens GN=LRP2 PE=1 SV=3	9663	cacoP7gpep1.3804.3804.2	controllerType=0 controllerNumber=1 scan=3804	14.4206
01673:2	6	R.IN[+1702.581]TTYRR.V	HexNAc(2)Hex(8)Fuc(0)NeuAc(0)	N[+1703]	1313.55	2	2626.1	2626.09	0	3.2	2176	Specific	303.66	147.96	147.96	2.87	61	>sp|P98164|LRP2_HUMAN Low-density lipoprotein receptor-related protein 2 OS=Homo sapiens GN=LRP2 PE=1 SV=3	9663	cacoP7gpep1.3170.3170.2	controllerType=0 controllerNumber=1 scan=3170	12.515
10001:2	6	R.SFLDC[+57.021]TN[+1971.719]R.T	HexNAc(5)Hex(5)Fuc(1)NeuAc(0)	C[+57], N[+1972]	1492.6	2	2984.19	2984.17	0	5.6	2218	Specific	303	170.16	170.16	5.8	61	>sp|P98164|LRP2_HUMAN Low-density lipoprotein receptor-related protein 2 OS=Homo sapiens GN=LRP2 PE=1 SV=3	9663	cacoP7gpep1.9522.9522.2	controllerType=0 controllerNumber=1 scan=9522	30.2749
13678:3	6	R.SFLDC[+57.021]TN[+2262.814]R.T	HexNAc(5)Hex(5)Fuc(1)NeuAc(1)	C[+57], N[+2263]	1092.43	3	3275.28	3275.27	0	3.1	2218	Specific	315.14	158.43	158.43	5.51	61	>sp|P98164|LRP2_HUMAN Low-density lipoprotein receptor-related protein 2 OS=Homo sapiens GN=LRP2 PE=1 SV=3	9663	cacoP7gpep1.12437.12437.3	controllerType=0 controllerNumber=1 scan=12437	41.4552
08367:2	6	R.SFLDC[+57.021]TN[+1864.634]R.T	HexNAc(2)Hex(9)Fuc(0)NeuAc(0)	C[+57], N[+1865]	1439.05	2	2877.1	2877.09	0	4.2	2218	Specific	323.08	254.54	254.54	6.06	61	>sp|P98164|LRP2_HUMAN Low-density lipoprotein receptor-related protein 2 OS=Homo sapiens GN=LRP2 PE=1 SV=3	9663	cacoP7gpep1.8270.8270.2	controllerType=0 controllerNumber=1 scan=8270	26.5402
08390:2	6	R.SFLDC[+57.021]TN[+1702.581]R.T	HexNAc(2)Hex(8)Fuc(0)NeuAc(0)	C[+57], N[+1703]	1358.03	2	2715.05	2715.03	0	4.6	2218	Specific	361.8	274.39	274.39	6.18	61	>sp|P98164|LRP2_HUMAN Low-density lipoprotein receptor-related protein 2 OS=Homo sapiens GN=LRP2 PE=1 SV=3	9663	cacoP7gpep1.8287.8287.2	controllerType=0 controllerNumber=1 scan=8287	26.6079
13146:3	6	R.DC[+57.021]N[+1971.719]ATTEFMC[+57.021]NNR.R	HexNAc(5)Hex(5)Fuc(1)NeuAc(0)	C[+57]*2, N[+1972]	1202.12	3	3604.35	3604.34	0	3.6	2779	Specific	298.17	211.06	211.06	5.77	61	>sp|P98164|LRP2_HUMAN Low-density lipoprotein receptor-related protein 2 OS=Homo sapiens GN=LRP2 PE=1 SV=3	9663	cacoP7gpep1.12026.12026.3	controllerType=0 controllerNumber=1 scan=12026	39.5612
15848:3	6	R.DC[+57.021]N[+2408.872]ATTEFMC[+57.021]NNR.R	HexNAc(5)Hex(5)Fuc(2)NeuAc(1)	C[+57]*2, N[+2409]	1348.17	3	4042.51	4041.49	1	3.1	2779	Specific	300.72	188.9	26.9	5.88	61	>sp|P98164|LRP2_HUMAN Low-density lipoprotein receptor-related protein 2 OS=Homo sapiens GN=LRP2 PE=1 SV=3	9663	cacoP7gpep1.14124.14124.3	controllerType=0 controllerNumber=1 scan=14124	49.8368
12727:3	6	R.DC[+57.021]N[+2117.777]ATTEFMC[+57.021]NNR.R	HexNAc(5)Hex(5)Fuc(2)NeuAc(0)	C[+57]*2, N[+2118]	1250.8	3	3750.37	3750.4	0	-6.1	2779	Specific	328.06	212.78	212.78	4.77	61	>sp|P98164|LRP2_HUMAN Low-density lipoprotein receptor-related protein 2 OS=Homo sapiens GN=LRP2 PE=1 SV=3	9663	cacoP7gpep1.11712.11712.3	controllerType=0 controllerNumber=1 scan=11712	38.138
16249:3	6	R.DC[+57.021]N[+2262.814]ATTEFMC[+57.021]NNR.R	HexNAc(5)Hex(5)Fuc(1)NeuAc(1)	C[+57]*2, N[+2263]	1299.14	3	3895.41	3895.43	0	-7.1	2779	Specific	328.8	247	247	5	61	>sp|P98164|LRP2_HUMAN Low-density lipoprotein receptor-related protein 2 OS=Homo sapiens GN=LRP2 PE=1 SV=3	9663	cacoP7gpep1.14431.14431.3	controllerType=0 controllerNumber=1 scan=14431	51.3709
16239:3	6	R.DC[+57.021]N[+2262.814]ATTEFMC[+57.021]NNR.R	HexNAc(5)Hex(5)Fuc(1)NeuAc(1)	C[+57]*2, N[+2263]	1299.15	3	3895.45	3895.43	0	2.8	2779	Specific	375.19	253.88	253.88	6.06	61	>sp|P98164|LRP2_HUMAN Low-density lipoprotein receptor-related protein 2 OS=Homo sapiens GN=LRP2 PE=1 SV=3	9663	cacoP7gpep1.14423.14423.3	controllerType=0 controllerNumber=1 scan=14423	51.3314
12714:3	6	R.DC[+57.021]N[+2117.777]ATTEFMC[+57.021]NNR.R	HexNAc(5)Hex(5)Fuc(2)NeuAc(0)	C[+57]*2, N[+2118]	1250.8	3	3750.39	3750.4	0	-3	2779	Specific	396.62	294.62	294.62	5.55	61	>sp|P98164|LRP2_HUMAN Low-density lipoprotein receptor-related protein 2 OS=Homo sapiens GN=LRP2 PE=1 SV=3	9663	cacoP7gpep1.11701.11701.3	controllerType=0 controllerNumber=1 scan=11701	38.0881
12234:3	6	R.DC[+57.021]N[+1702.581]ATTEFMC[+57.021]NNR.R	HexNAc(2)Hex(8)Fuc(0)NeuAc(0)	C[+57]*2, N[+1703]	1112.41	3	3335.21	3335.2	0	1.9	2779	Specific	418.17	383.8	383.8	7.93	61	>sp|P98164|LRP2_HUMAN Low-density lipoprotein receptor-related protein 2 OS=Homo sapiens GN=LRP2 PE=1 SV=3	9663	cacoP7gpep1.11334.11334.3	controllerType=0 controllerNumber=1 scan=11334	36.5936
12221:3	6	R.DC[+57.021]N[+1864.634]ATTEFMC[+57.021]NNR.R	HexNAc(2)Hex(9)Fuc(0)NeuAc(0)	C[+57]*2, N[+1865]	1166.43	3	3497.26	3497.25	0	3.1	2779	Specific	562.31	502.13	502.13	8.72	61	>sp|P98164|LRP2_HUMAN Low-density lipoprotein receptor-related protein 2 OS=Homo sapiens GN=LRP2 PE=1 SV=3	9663	cacoP7gpep1.11326.11326.3	controllerType=0 controllerNumber=1 scan=11326	36.5577
08785:3	6	R.DC[+57.021]N[+1864.634]ATTEFMC[+57.021]NNRR.C	HexNAc(2)Hex(9)Fuc(0)NeuAc(0)	C[+57]*2, N[+1865]	1218.46	3	3653.37	3653.36	0	4.4	2779	Specific	165.13	115.34	115.34	3.28	61	>sp|P98164|LRP2_HUMAN Low-density lipoprotein receptor-related protein 2 OS=Homo sapiens GN=LRP2 PE=1 SV=3	9663	cacoP7gpep1.8581.8581.3	controllerType=0 controllerNumber=1 scan=8581	27.4314
09056:5	6	R.HQC[+57.021]QNQN[+1702.581]C[+57.021]SDSEFLC[+57.021]VNDRPPDRR.C	HexNAc(2)Hex(8)Fuc(0)NeuAc(0)	C[+57]*3, N[+1703]	947.783	5	4734.88	4734.87	0	2.7	2941	Specific	95.79	81.77	81.77	2.88	61	>sp|P98164|LRP2_HUMAN Low-density lipoprotein receptor-related protein 2 OS=Homo sapiens GN=LRP2 PE=1 SV=3	9663	cacoP7gpep1.8799.8799.5	controllerType=0 controllerNumber=1 scan=8799	28.0566
04716:2	6	R.MFLN[+1864.634]K.T	HexNAc(2)Hex(9)Fuc(0)NeuAc(0)	N[+1865]	1259	2	2516.99	2516.98	0	2.8	3254	Specific	403.55	241.58	241.58	5.1	61	>sp|P98164|LRP2_HUMAN Low-density lipoprotein receptor-related protein 2 OS=Homo sapiens GN=LRP2 PE=1 SV=3	9663	cacoP7gpep1.5547.5547.2	controllerType=0 controllerNumber=1 scan=5547	19.3962
01179:2	6	R.VGMDGTN[+1864.634]K.S	HexNAc(2)Hex(9)Fuc(0)NeuAc(0)	N[+1865]	1343.52	2	2686.03	2686.02	0	6.6	3349	Specific	282.4	181.12	181.12	5.66	61	>sp|P98164|LRP2_HUMAN Low-density lipoprotein receptor-related protein 2 OS=Homo sapiens GN=LRP2 PE=1 SV=3	9663	cacoP7gpep1.2757.2757.2	controllerType=0 controllerNumber=1 scan=2757	11.1854
01222:2	6	R.VGMDGTN[+1540.529]K.S	HexNAc(2)Hex(7)Fuc(0)NeuAc(0)	N[+1541]	1181.46	2	2361.92	2361.91	0	4.8	3349	Specific	358.04	178.86	178.86	5.99	61	>sp|P98164|LRP2_HUMAN Low-density lipoprotein receptor-related protein 2 OS=Homo sapiens GN=LRP2 PE=1 SV=3	9663	cacoP7gpep1.2796.2796.2	controllerType=0 controllerNumber=1 scan=2796	11.333
02166:2	6	R.KYN[+1702.581]LSSER.F	HexNAc(2)Hex(8)Fuc(0)NeuAc(0)	N[+1703]	1350.06	2	2699.11	2699.09	0	7	4066	Specific	420.06	205.9	205.9	5.59	61	>sp|P98164|LRP2_HUMAN Low-density lipoprotein receptor-related protein 2 OS=Homo sapiens GN=LRP2 PE=1 SV=3	9663	cacoP7gpep1.3573.3573.2	controllerType=0 controllerNumber=1 scan=3573	13.7252
03948:2	6	K.YN[+1702.581]LSSER.F	HexNAc(2)Hex(8)Fuc(0)NeuAc(0)	N[+1703]	1286.01	2	2571.01	2571	0	5.1	4067	Specific	281.85	201.69	201.69	4.8	61	>sp|P98164|LRP2_HUMAN Low-density lipoprotein receptor-related protein 2 OS=Homo sapiens GN=LRP2 PE=1 SV=3	9663	cacoP7gpep1.4972.4972.2	controllerType=0 controllerNumber=1 scan=4972	17.7346
03749:2	6	K.YN[+2026.687]LSSER.F	HexNAc(2)Hex(10)Fuc(0)NeuAc(0)	N[+2027]	1448.07	2	2895.13	2895.1	0	7.9	4067	Specific	283.18	188.5	188.5	4.64	61	>sp|P98164|LRP2_HUMAN Low-density lipoprotein receptor-related protein 2 OS=Homo sapiens GN=LRP2 PE=1 SV=3	9663	cacoP7gpep1.4825.4825.2	controllerType=0 controllerNumber=1 scan=4825	17.3325
03872:2	6	K.YN[+1540.529]LSSER.F	HexNAc(2)Hex(7)Fuc(0)NeuAc(0)	N[+1541]	1204.98	2	2408.95	2408.94	0	3.6	4067	Specific	316.37	179.1	179.1	4.73	61	>sp|P98164|LRP2_HUMAN Low-density lipoprotein receptor-related protein 2 OS=Homo sapiens GN=LRP2 PE=1 SV=3	9663	cacoP7gpep1.4914.4914.2	controllerType=0 controllerNumber=1 scan=4914	17.5807
03969:2	6	K.YN[+1540.529]LSSER.F	HexNAc(2)Hex(7)Fuc(0)NeuAc(0)	N[+1541]	1204.98	2	2408.95	2408.94	0	2.2	4067	Specific	316.65	261.8	261.8	5.01	61	>sp|P98164|LRP2_HUMAN Low-density lipoprotein receptor-related protein 2 OS=Homo sapiens GN=LRP2 PE=1 SV=3	9663	cacoP7gpep1.4992.4992.2	controllerType=0 controllerNumber=1 scan=4992	17.8031
03700:2	6	K.YN[+1864.634]LSSER.F	HexNAc(2)Hex(9)Fuc(0)NeuAc(0)	N[+1865]	1367.03	2	2733.06	2733.05	0	1.8	4067	Specific	335.96	210.42	210.42	5	61	>sp|P98164|LRP2_HUMAN Low-density lipoprotein receptor-related protein 2 OS=Homo sapiens GN=LRP2 PE=1 SV=3	9663	cacoP7gpep1.4791.4791.2	controllerType=0 controllerNumber=1 scan=4791	17.2442
03713:2	6	K.YN[+1702.581]LSSER.F	HexNAc(2)Hex(8)Fuc(0)NeuAc(0)	N[+1703]	1286.01	2	2571	2571	0	2.4	4067	Specific	336.7	216.27	216.27	5.08	61	>sp|P98164|LRP2_HUMAN Low-density lipoprotein receptor-related protein 2 OS=Homo sapiens GN=LRP2 PE=1 SV=3	9663	cacoP7gpep1.4799.4799.2	controllerType=0 controllerNumber=1 scan=4799	17.2653
00412:2	6	R.YN[+1702.581]K.S	HexNAc(2)Hex(8)Fuc(0)NeuAc(0)	N[+1703]	1063.91	2	2126.81	2126.8	0	3.2	4326	Specific	298.45	192.86	192.86	4.75	61	>sp|P98164|LRP2_HUMAN Low-density lipoprotein receptor-related protein 2 OS=Homo sapiens GN=LRP2 PE=1 SV=3	9663	cacoP7gpep1.2150.2150.2	controllerType=0 controllerNumber=1 scan=2150	8.8072
13130:2	7	K.LLNN[+1702.581]LTSIK.I	HexNAc(2)Hex(8)Fuc(0)NeuAc(0)	N[+1703]	1359.61	2	2718.21	2718.2	0	4.7	647	Specific	513.09	314.25	314.25	6.77	23	>sp|P11047|LAMC1_HUMAN Laminin subunit gamma-1 OS=Homo sapiens GN=LAMC1 PE=1 SV=3	9234	cacoP7gpep1.12016.12016.2	controllerType=0 controllerNumber=1 scan=12016	39.5172
13094:2	7	K.LLNN[+1864.634]LTSIK.I	HexNAc(2)Hex(9)Fuc(0)NeuAc(0)	N[+1865]	1440.63	2	2880.26	2880.25	0	4.4	647	Specific	522.04	325.27	325.27	6.94	23	>sp|P11047|LAMC1_HUMAN Laminin subunit gamma-1 OS=Homo sapiens GN=LAMC1 PE=1 SV=3	9234	cacoP7gpep1.11988.11988.2	controllerType=0 controllerNumber=1 scan=11988	39.3976
06483:3	7	R.VN[+1702.581]NTLSSQISR.L	HexNAc(2)Hex(8)Fuc(0)NeuAc(0)	N[+1703]	974.416	3	2921.23	2921.22	0	3	1106	Specific	293.32	133.85	133.85	5.44	23	>sp|P11047|LAMC1_HUMAN Laminin subunit gamma-1 OS=Homo sapiens GN=LAMC1 PE=1 SV=3	9234	cacoP7gpep1.6809.6809.3	controllerType=0 controllerNumber=1 scan=6809	22.5846
06827:2	7	R.VN[+1378.476]NTLSSQISR.L	HexNAc(2)Hex(6)Fuc(0)NeuAc(0)	N[+1378]	1299.07	2	2597.13	2597.12	0	2.8	1106	Specific	397.81	303.04	303.04	6.49	23	>sp|P11047|LAMC1_HUMAN Laminin subunit gamma-1 OS=Homo sapiens GN=LAMC1 PE=1 SV=3	9234	cacoP7gpep1.7063.7063.2	controllerType=0 controllerNumber=1 scan=7063	23.1848
06490:2	7	R.VN[+1702.581]NTLSSQISR.L	HexNAc(2)Hex(8)Fuc(0)NeuAc(0)	N[+1703]	1461.13	2	2921.25	2921.22	0	7.6	1106	Specific	447.26	342.19	342.19	6.66	23	>sp|P11047|LAMC1_HUMAN Laminin subunit gamma-1 OS=Homo sapiens GN=LAMC1 PE=1 SV=3	9234	cacoP7gpep1.6815.6815.2	controllerType=0 controllerNumber=1 scan=6815	22.6019
06488:2	7	R.VN[+1702.581]NTLSSQISR.L	HexNAc(2)Hex(8)Fuc(0)NeuAc(0)	N[+1703]	1461.12	2	2921.24	2921.22	0	4.4	1106	Specific	514.37	311.82	311.82	6.77	23	>sp|P11047|LAMC1_HUMAN Laminin subunit gamma-1 OS=Homo sapiens GN=LAMC1 PE=1 SV=3	9234	cacoP7gpep1.6812.6812.2	controllerType=0 controllerNumber=1 scan=6812	22.5908
14828:3	7	K.TAN[+1702.581]DTSTEAYNLLLR.T	HexNAc(2)Hex(8)Fuc(0)NeuAc(0)	N[+1703]	1128.82	3	3384.43	3384.42	0	2.9	1203	Specific	312.26	232.75	232.75	5.86	23	>sp|P11047|LAMC1_HUMAN Laminin subunit gamma-1 OS=Homo sapiens GN=LAMC1 PE=1 SV=3	9234	cacoP7gpep1.13335.13335.3	controllerType=0 controllerNumber=1 scan=13335	45.9232
20164:3	7	K.TAN[+1540.529]DTSTEAYNLLLR.T	HexNAc(2)Hex(7)Fuc(0)NeuAc(0)	N[+1541]	1074.79	3	3222.37	3222.37	0	0.5	1203	Specific	361.39	202.82	202.82	5.92	23	>sp|P11047|LAMC1_HUMAN Laminin subunit gamma-1 OS=Homo sapiens GN=LAMC1 PE=1 SV=3	9234	cacoP7gpep1.17609.17609.3	controllerType=0 controllerNumber=1 scan=17609	66.899
20162:3	7	K.TAN[+1378.476]DTSTEAYNLLLR.T	HexNAc(2)Hex(6)Fuc(0)NeuAc(0)	N[+1378]	1020.78	3	3060.33	3060.31	0	3.6	1203	Specific	472.47	319.27	319.27	6.49	23	>sp|P11047|LAMC1_HUMAN Laminin subunit gamma-1 OS=Homo sapiens GN=LAMC1 PE=1 SV=3	9234	cacoP7gpep1.17608.17608.3	controllerType=0 controllerNumber=1 scan=17608	66.8933
19945:2	7	K.TAN[+1702.581]DTSTEAYNLLLR.T	HexNAc(2)Hex(8)Fuc(0)NeuAc(0)	N[+1703]	1692.72	2	3384.44	3384.42	0	5.9	1203	Specific	482.35	330.19	330.19	6.88	23	>sp|P11047|LAMC1_HUMAN Laminin subunit gamma-1 OS=Homo sapiens GN=LAMC1 PE=1 SV=3	9234	cacoP7gpep1.17412.17412.2	controllerType=0 controllerNumber=1 scan=17412	65.9838
19973:2	7	K.TAN[+1702.581]DTSTEAYNLLLR.T	HexNAc(2)Hex(8)Fuc(0)NeuAc(0)	N[+1703]	1692.72	2	3384.43	3384.42	0	3.8	1203	Specific	514.94	348.09	348.09	7.07	23	>sp|P11047|LAMC1_HUMAN Laminin subunit gamma-1 OS=Homo sapiens GN=LAMC1 PE=1 SV=3	9234	cacoP7gpep1.17437.17437.2	controllerType=0 controllerNumber=1 scan=17437	66.1072
19861:3	7	K.TAN[+1864.634]DTSTEAYNLLLR.T	HexNAc(2)Hex(9)Fuc(0)NeuAc(0)	N[+1865]	1182.84	3	3546.49	3546.47	0	5.9	1203	Specific	649.04	473.64	473.64	10.84	23	>sp|P11047|LAMC1_HUMAN Laminin subunit gamma-1 OS=Homo sapiens GN=LAMC1 PE=1 SV=3	9234	cacoP7gpep1.17339.17339.3	controllerType=0 controllerNumber=1 scan=17339	65.6434
20009:3	7	K.TAN[+1540.529]DTSTEAYNLLLR.T	HexNAc(2)Hex(7)Fuc(0)NeuAc(0)	N[+1541]	1074.8	3	3222.37	3222.37	0	1.5	1203	Specific	828.17	620.49	620.49	14.91	23	>sp|P11047|LAMC1_HUMAN Laminin subunit gamma-1 OS=Homo sapiens GN=LAMC1 PE=1 SV=3	9234	cacoP7gpep1.17468.17468.3	controllerType=0 controllerNumber=1 scan=17468	66.2596
19986:3	7	K.TAN[+1540.529]DTSTEAYNLLLR.T	HexNAc(2)Hex(7)Fuc(0)NeuAc(0)	N[+1541]	1074.79	3	3222.36	3222.37	0	-1.3	1203	Specific	946.46	720.54	720.54	16.45	23	>sp|P11047|LAMC1_HUMAN Laminin subunit gamma-1 OS=Homo sapiens GN=LAMC1 PE=1 SV=3	9234	cacoP7gpep1.17447.17447.3	controllerType=0 controllerNumber=1 scan=17447	66.1577
19831:3	7	R.TLAGEN[+1540.529]QTAFEIEELNR.K	HexNAc(2)Hex(7)Fuc(0)NeuAc(0)	N[+1541]	1159.17	3	3475.5	3475.47	0	7.7	1218	Specific	135.2	87.07	87.07	3.14	23	>sp|P11047|LAMC1_HUMAN Laminin subunit gamma-1 OS=Homo sapiens GN=LAMC1 PE=1 SV=3	9234	cacoP7gpep1.17311.17311.3	controllerType=0 controllerNumber=1 scan=17311	65.5069
19599:3	7	R.TLAGEN[+1864.634]QTAFEIEELNR.K	HexNAc(2)Hex(9)Fuc(0)NeuAc(0)	N[+1865]	1267.21	3	3799.61	3799.58	0	9	1218	Specific	473.13	392.72	392.72	8.16	23	>sp|P11047|LAMC1_HUMAN Laminin subunit gamma-1 OS=Homo sapiens GN=LAMC1 PE=1 SV=3	9234	cacoP7gpep1.17115.17115.3	controllerType=0 controllerNumber=1 scan=17115	64.5373
19582:3	7	R.TLAGEN[+1702.581]QTAFEIEELNR.K	HexNAc(2)Hex(8)Fuc(0)NeuAc(0)	N[+1703]	1213.19	3	3637.54	3637.53	0	4.2	1218	Specific	491.67	407.13	407.13	8.78	23	>sp|P11047|LAMC1_HUMAN Laminin subunit gamma-1 OS=Homo sapiens GN=LAMC1 PE=1 SV=3	9234	cacoP7gpep1.17099.17099.3	controllerType=0 controllerNumber=1 scan=17099	64.4617
19800:3	7	R.TLAGEN[+1378.476]QTAFEIEELNR.K	HexNAc(2)Hex(6)Fuc(0)NeuAc(0)	N[+1378]	1105.15	3	3313.44	3313.42	0	7	1218	Specific	516.91	400.05	400.05	8.61	23	>sp|P11047|LAMC1_HUMAN Laminin subunit gamma-1 OS=Homo sapiens GN=LAMC1 PE=1 SV=3	9234	cacoP7gpep1.17290.17290.3	controllerType=0 controllerNumber=1 scan=17290	65.4006
19728:3	7	R.TLAGEN[+1702.581]QTAFEIEELNR.K	HexNAc(2)Hex(8)Fuc(0)NeuAc(0)	N[+1703]	1213.19	3	3637.54	3637.53	0	4.7	1218	Specific	594.2	492.5	492.5	10.41	23	>sp|P11047|LAMC1_HUMAN Laminin subunit gamma-1 OS=Homo sapiens GN=LAMC1 PE=1 SV=3	9234	cacoP7gpep1.17234.17234.3	controllerType=0 controllerNumber=1 scan=17234	65.1194
19743:3	7	R.TLAGEN[+1540.529]QTAFEIEELNR.K	HexNAc(2)Hex(7)Fuc(0)NeuAc(0)	N[+1541]	1159.17	3	3475.48	3475.47	0	2.9	1218	Specific	735.19	672.85	672.85	13.5	23	>sp|P11047|LAMC1_HUMAN Laminin subunit gamma-1 OS=Homo sapiens GN=LAMC1 PE=1 SV=3	9234	cacoP7gpep1.17244.17244.3	controllerType=0 controllerNumber=1 scan=17244	65.1698
16676:3	7	R.TLAGEN[+1702.581]QTAFEIEELNRK.Y	HexNAc(2)Hex(8)Fuc(0)NeuAc(0)	N[+1703]	1255.89	3	3765.65	3765.62	0	6.3	1218	Specific	309.93	211.11	211.11	6.39	23	>sp|P11047|LAMC1_HUMAN Laminin subunit gamma-1 OS=Homo sapiens GN=LAMC1 PE=1 SV=3	9234	cacoP7gpep1.14750.14750.4	controllerType=0 controllerNumber=1 scan=14750	52.9674
05028:2	7	K.N[+1702.581]ISQDLEK.Q	HexNAc(2)Hex(8)Fuc(0)NeuAc(0)	N[+1703]	1325.04	2	2649.08	2649.07	0	3.8	1241	Specific	547	52.08	52.08	5.41	23	>sp|P11047|LAMC1_HUMAN Laminin subunit gamma-1 OS=Homo sapiens GN=LAMC1 PE=1 SV=3	9234	cacoP7gpep1.5777.5777.2	controllerType=0 controllerNumber=1 scan=5777	20.0283
11066:3	7	R.KIPAIN[+1540.529]QTITEANEK.T	HexNAc(2)Hex(7)Fuc(0)NeuAc(0)	N[+1541]	1070.82	3	3210.45	3210.44	0	4.5	1390	Specific	465.99	289.37	289.37	6.62	23	>sp|P11047|LAMC1_HUMAN Laminin subunit gamma-1 OS=Homo sapiens GN=LAMC1 PE=1 SV=3	9234	cacoP7gpep1.10406.10406.3	controllerType=0 controllerNumber=1 scan=10406	33.2245
11005:3	7	R.KIPAIN[+1540.529]QTITEANEK.T	HexNAc(2)Hex(7)Fuc(0)NeuAc(0)	N[+1541]	1070.82	3	3210.44	3210.44	0	-0.3	1390	Specific	471.96	337.53	337.53	6.57	23	>sp|P11047|LAMC1_HUMAN Laminin subunit gamma-1 OS=Homo sapiens GN=LAMC1 PE=1 SV=3	9234	cacoP7gpep1.10353.10353.3	controllerType=0 controllerNumber=1 scan=10353	33.0517
11041:3	7	R.KIPAIN[+1540.529]QTITEANEK.T	HexNAc(2)Hex(7)Fuc(0)NeuAc(0)	N[+1541]	1070.82	3	3210.43	3210.44	0	-1.9	1390	Specific	478.6	308.27	308.27	6.1	23	>sp|P11047|LAMC1_HUMAN Laminin subunit gamma-1 OS=Homo sapiens GN=LAMC1 PE=1 SV=3	9234	cacoP7gpep1.10385.10385.3	controllerType=0 controllerNumber=1 scan=10385	33.1547
11296:3	7	R.KIPAIN[+1378.476]QTITEANEK.T	HexNAc(2)Hex(6)Fuc(0)NeuAc(0)	N[+1378]	1016.8	3	3048.37	3048.39	0	-4.7	1390	Specific	517	319.93	319.93	6.25	23	>sp|P11047|LAMC1_HUMAN Laminin subunit gamma-1 OS=Homo sapiens GN=LAMC1 PE=1 SV=3	9234	cacoP7gpep1.10626.10626.3	controllerType=0 controllerNumber=1 scan=10626	33.865
10864:3	7	R.KIPAIN[+1702.581]QTITEANEK.T	HexNAc(2)Hex(8)Fuc(0)NeuAc(0)	N[+1703]	1124.84	3	3372.5	3372.49	0	2.1	1390	Specific	531.49	418.06	418.06	8.68	23	>sp|P11047|LAMC1_HUMAN Laminin subunit gamma-1 OS=Homo sapiens GN=LAMC1 PE=1 SV=3	9234	cacoP7gpep1.10236.10236.3	controllerType=0 controllerNumber=1 scan=10236	32.6476
10889:3	7	R.KIPAIN[+1702.581]QTITEANEK.T	HexNAc(2)Hex(8)Fuc(0)NeuAc(0)	N[+1703]	1124.84	3	3372.51	3372.49	0	5	1390	Specific	549.05	299.07	299.07	6.99	23	>sp|P11047|LAMC1_HUMAN Laminin subunit gamma-1 OS=Homo sapiens GN=LAMC1 PE=1 SV=3	9234	cacoP7gpep1.10257.10257.3	controllerType=0 controllerNumber=1 scan=10257	32.7173
11143:3	7	R.KIPAIN[+1540.529]QTITEANEK.T	HexNAc(2)Hex(7)Fuc(0)NeuAc(0)	N[+1541]	1070.82	3	3210.44	3210.44	0	-0.3	1390	Specific	589.45	496.4	496.4	9.9	23	>sp|P11047|LAMC1_HUMAN Laminin subunit gamma-1 OS=Homo sapiens GN=LAMC1 PE=1 SV=3	9234	cacoP7gpep1.10488.10488.3	controllerType=0 controllerNumber=1 scan=10488	33.4311
11109:3	7	R.KIPAIN[+1702.581]QTITEANEK.T	HexNAc(2)Hex(8)Fuc(0)NeuAc(0)	N[+1703]	1124.84	3	3372.5	3372.49	0	2.9	1390	Specific	730.7	639.18	639.18	13.23	23	>sp|P11047|LAMC1_HUMAN Laminin subunit gamma-1 OS=Homo sapiens GN=LAMC1 PE=1 SV=3	9234	cacoP7gpep1.10447.10447.3	controllerType=0 controllerNumber=1 scan=10447	33.3322
23458:3	8	R.FQLLN[+2774.004]FSSSELK.V	HexNAc(6)Hex(6)Fuc(2)NeuAc(1)	N[+2774]	1396.25	3	4186.75	4186.75	0	0.9	97	Specific	174.39	67.02	25.92	2.72	51	>sp|Q9BY67|CADM1_HUMAN Cell adhesion molecule 1 OS=Homo sapiens GN=CADM1 PE=1 SV=2	2054	cacoP7gpep1.23699.23699.3	controllerType=0 controllerNumber=1 scan=23699	92.9001
22259:3	8	R.FQLLN[+2628.967]FSSSELK.V	HexNAc(6)Hex(6)Fuc(3)NeuAc(0)	N[+2629]	1347.92	3	4041.75	4041.71	0	9	97	Specific	177.35	131.53	131.53	2.84	51	>sp|Q9BY67|CADM1_HUMAN Cell adhesion molecule 1 OS=Homo sapiens GN=CADM1 PE=1 SV=2	2054	cacoP7gpep1.20091.20091.3	controllerType=0 controllerNumber=1 scan=20091	77.522
22214:3	8	R.FQLLN[+2482.909]FSSSELK.V	HexNAc(6)Hex(6)Fuc(2)NeuAc(0)	N[+2483]	1299.22	3	3895.66	3895.65	0	1.5	97	Specific	186.62	95.06	95.06	2.87	51	>sp|Q9BY67|CADM1_HUMAN Cell adhesion molecule 1 OS=Homo sapiens GN=CADM1 PE=1 SV=2	2054	cacoP7gpep1.20025.20025.3	controllerType=0 controllerNumber=1 scan=20025	77.2417
22278:3	8	R.FQLLN[+2336.851]FSSSELK.V	HexNAc(6)Hex(6)Fuc(1)NeuAc(0)	N[+2337]	1250.54	3	3749.61	3749.59	0	4.1	97	Specific	204.87	99.09	99.09	2.85	51	>sp|Q9BY67|CADM1_HUMAN Cell adhesion molecule 1 OS=Homo sapiens GN=CADM1 PE=1 SV=2	2054	cacoP7gpep1.20118.20118.3	controllerType=0 controllerNumber=1 scan=20118	77.6381
22216:3	8	R.FQLLN[+2627.947]FSSSELK.V	HexNAc(6)Hex(6)Fuc(1)NeuAc(1)	N[+2628]	1347.58	3	4040.72	4040.69	0	8.1	97	Specific	208.95	65.01	16.06	2.61	51	>sp|Q9BY67|CADM1_HUMAN Cell adhesion molecule 1 OS=Homo sapiens GN=CADM1 PE=1 SV=2	2054	cacoP7gpep1.20031.20031.3	controllerType=0 controllerNumber=1 scan=20031	77.2646
23479:3	8	R.FQLLN[+2627.947]FSSSELK.V	HexNAc(6)Hex(6)Fuc(1)NeuAc(1)	N[+2628]	1347.56	3	4040.67	4040.69	0	-3.5	97	Specific	231.01	113.61	44.34	4.46	51	>sp|Q9BY67|CADM1_HUMAN Cell adhesion molecule 1 OS=Homo sapiens GN=CADM1 PE=1 SV=2	2054	cacoP7gpep1.23836.23836.3	controllerType=0 controllerNumber=1 scan=23836	93.4943
22284:3	8	R.FQLLN[+2336.851]FSSSELK.V	HexNAc(6)Hex(6)Fuc(1)NeuAc(0)	N[+2337]	1250.54	3	3749.61	3749.59	0	4.5	97	Specific	245.15	123.13	123.13	5.39	51	>sp|Q9BY67|CADM1_HUMAN Cell adhesion molecule 1 OS=Homo sapiens GN=CADM1 PE=1 SV=2	2054	cacoP7gpep1.20128.20128.3	controllerType=0 controllerNumber=1 scan=20128	77.6757
22179:3	8	R.FQLLN[+2627.947]FSSSELK.V	HexNAc(6)Hex(6)Fuc(1)NeuAc(1)	N[+2628]	1347.58	3	4040.71	4040.69	0	6.2	97	Specific	253.5	129.28	15.92	5.34	51	>sp|Q9BY67|CADM1_HUMAN Cell adhesion molecule 1 OS=Homo sapiens GN=CADM1 PE=1 SV=2	2054	cacoP7gpep1.19947.19947.3	controllerType=0 controllerNumber=1 scan=19947	76.9073
22240:3	8	R.FQLLN[+2482.909]FSSSELK.V	HexNAc(6)Hex(6)Fuc(2)NeuAc(0)	N[+2483]	1299.23	3	3895.67	3895.65	0	5.3	97	Specific	256.61	125.91	125.91	5.34	51	>sp|Q9BY67|CADM1_HUMAN Cell adhesion molecule 1 OS=Homo sapiens GN=CADM1 PE=1 SV=2	2054	cacoP7gpep1.20069.20069.3	controllerType=0 controllerNumber=1 scan=20069	77.4204
22154:3	8	R.FQLLN[+2774.004]FSSSELK.V	HexNAc(6)Hex(6)Fuc(2)NeuAc(1)	N[+2774]	1396.6	3	4187.78	4186.75	1	7.3	97	Specific	262.44	134.14	18.17	5.24	51	>sp|Q9BY67|CADM1_HUMAN Cell adhesion molecule 1 OS=Homo sapiens GN=CADM1 PE=1 SV=2	2054	cacoP7gpep1.19863.19863.3	controllerType=0 controllerNumber=1 scan=19863	76.5614
22144:3	8	R.FQLLN[+2774.004]FSSSELK.V	HexNAc(6)Hex(6)Fuc(2)NeuAc(1)	N[+2774]	1396.6	3	4187.77	4186.75	1	5.7	97	Specific	269.13	180.57	17.82	5.59	51	>sp|Q9BY67|CADM1_HUMAN Cell adhesion molecule 1 OS=Homo sapiens GN=CADM1 PE=1 SV=2	2054	cacoP7gpep1.19849.19849.3	controllerType=0 controllerNumber=1 scan=19849	76.5035
22140:3	8	R.FQLLN[+2774.004]FSSSELK.V	HexNAc(6)Hex(6)Fuc(2)NeuAc(1)	N[+2774]	1396.6	3	4187.78	4186.75	1	8.4	97	Specific	271.18	110.18	17.79	4.65	51	>sp|Q9BY67|CADM1_HUMAN Cell adhesion molecule 1 OS=Homo sapiens GN=CADM1 PE=1 SV=2	2054	cacoP7gpep1.19837.19837.3	controllerType=0 controllerNumber=1 scan=19837	76.4554
22155:3	8	R.FQLLN[+2774.004]FSSSELK.V	HexNAc(6)Hex(6)Fuc(2)NeuAc(1)	N[+2774]	1396.6	3	4187.78	4186.75	1	7.7	97	Specific	278.65	145.96	19.06	5.28	51	>sp|Q9BY67|CADM1_HUMAN Cell adhesion molecule 1 OS=Homo sapiens GN=CADM1 PE=1 SV=2	2054	cacoP7gpep1.19865.19865.3	controllerType=0 controllerNumber=1 scan=19865	76.5685
23470:3	8	R.FQLLN[+2774.004]FSSSELK.V	HexNAc(6)Hex(6)Fuc(2)NeuAc(1)	N[+2774]	1396.26	3	4186.77	4186.75	0	6.2	97	Specific	281.25	126.24	25.51	5.43	51	>sp|Q9BY67|CADM1_HUMAN Cell adhesion molecule 1 OS=Homo sapiens GN=CADM1 PE=1 SV=2	2054	cacoP7gpep1.23781.23781.3	controllerType=0 controllerNumber=1 scan=23781	93.2591
17635:4	8	K.VSLTN[+2774.004]VSISDEGR.Y	HexNAc(6)Hex(6)Fuc(2)NeuAc(1)	N[+2774]	1038.44	4	4150.72	4150.71	0	3.3	109	Specific	145.48	72.57	20.95	2.03	51	>sp|Q9BY67|CADM1_HUMAN Cell adhesion molecule 1 OS=Homo sapiens GN=CADM1 PE=1 SV=2	2054	cacoP7gpep1.15490.15490.4	controllerType=0 controllerNumber=1 scan=15490	56.664
14263:3	8	K.VSLTN[+2921.083]VSISDEGR.Y	HexNAc(6)Hex(6)Fuc(5)NeuAc(0)	N[+2921]	1433.27	3	4297.81	4297.78	0	6	109	Specific	152.98	74.26	74.26	2.73	51	>sp|Q9BY67|CADM1_HUMAN Cell adhesion molecule 1 OS=Homo sapiens GN=CADM1 PE=1 SV=2	2054	cacoP7gpep1.12890.12890.3	controllerType=0 controllerNumber=1 scan=12890	43.6839
17886:3	8	K.VSLTN[+2059.735]VSISDEGR.Y	HexNAc(4)Hex(5)Fuc(1)NeuAc(1)	N[+2060]	1146.16	3	3436.46	3436.44	0	6.2	109	Specific	154.24	67.91	67.91	2.5	51	>sp|Q9BY67|CADM1_HUMAN Cell adhesion molecule 1 OS=Homo sapiens GN=CADM1 PE=1 SV=2	2054	cacoP7gpep1.15679.15679.3	controllerType=0 controllerNumber=1 scan=15679	57.6151
23553:3	8	K.VSLTN[+3210.137]VSISDEGR.Y	HexNAc(6)Hex(6)Fuc(1)NeuAc(3)	N[+3210]	1529.28	3	4585.84	4586.84	-1	0	109	Specific	156.18	82.96	82.96	2.8	51	>sp|Q9BY67|CADM1_HUMAN Cell adhesion molecule 1 OS=Homo sapiens GN=CADM1 PE=1 SV=2	2054	cacoP7gpep1.24155.24155.3	controllerType=0 controllerNumber=1 scan=24155	94.8306
17482:4	8	K.VSLTN[+2774.004]VSISDEGR.Y	HexNAc(6)Hex(6)Fuc(2)NeuAc(1)	N[+2774]	1038.43	4	4150.71	4150.71	0	1.5	109	Specific	157.37	77.06	23.27	2.06	51	>sp|Q9BY67|CADM1_HUMAN Cell adhesion molecule 1 OS=Homo sapiens GN=CADM1 PE=1 SV=2	2054	cacoP7gpep1.15367.15367.3	controllerType=0 controllerNumber=1 scan=15367	56.0481
20367:4	8	K.VSLTN[+4159.501]VSISDEGR.Y	HexNAc(7)Hex(7)Fuc(5)NeuAc(3)	N[+4160]	1384.81	4	5536.23	5536.2	0	4.7	109	Specific	167.12	90.16	90.16	2.49	51	>sp|Q9BY67|CADM1_HUMAN Cell adhesion molecule 1 OS=Homo sapiens GN=CADM1 PE=1 SV=2	2054	cacoP7gpep1.17818.17818.4	controllerType=0 controllerNumber=1 scan=17818	67.7947
21751:3	8	K.VSLTN[+2350.830]VSISDEGR.Y	HexNAc(4)Hex(5)Fuc(1)NeuAc(2)	N[+2351]	1243.19	3	3727.55	3727.53	0	4.7	109	Specific	167.54	114.03	114.03	2.97	51	>sp|Q9BY67|CADM1_HUMAN Cell adhesion molecule 1 OS=Homo sapiens GN=CADM1 PE=1 SV=2	2054	cacoP7gpep1.19289.19289.3	controllerType=0 controllerNumber=1 scan=19289	74.1722
17209:3	8	K.VSLTN[+3139.137]VSISDEGR.Y	HexNAc(7)Hex(7)Fuc(2)NeuAc(1)	N[+3139]	1505.96	3	4515.88	4515.84	0	8.3	109	Specific	171.07	117.2	23.81	2.69	51	>sp|Q9BY67|CADM1_HUMAN Cell adhesion molecule 1 OS=Homo sapiens GN=CADM1 PE=1 SV=2	2054	cacoP7gpep1.15152.15152.3	controllerType=0 controllerNumber=1 scan=15152	54.976
14086:3	8	K.VSLTN[+2921.083]VSISDEGR.Y	HexNAc(6)Hex(6)Fuc(5)NeuAc(0)	N[+2921]	1433.28	3	4297.82	4297.78	0	8.1	109	Specific	174.8	87.84	87.84	2.8	51	>sp|Q9BY67|CADM1_HUMAN Cell adhesion molecule 1 OS=Homo sapiens GN=CADM1 PE=1 SV=2	2054	cacoP7gpep1.12742.12742.3	controllerType=0 controllerNumber=1 scan=12742	42.945
17725:3	8	K.VSLTN[+2976.063]VSISDEGR.Y	HexNAc(7)Hex(6)Fuc(0)NeuAc(2)	N[+2976]	1451.27	3	4351.78	4352.77	-1	4.6	109	Specific	177.78	68.22	68.22	2.83	51	>sp|Q9BY67|CADM1_HUMAN Cell adhesion molecule 1 OS=Homo sapiens GN=CADM1 PE=1 SV=2	2054	cacoP7gpep1.15554.15554.3	controllerType=0 controllerNumber=1 scan=15554	56.9877
17799:3	8	K.VSLTN[+2903.047]VSISDEGR.Y	HexNAc(6)Hex(5)Fuc(2)NeuAc(2)	N[+2903]	1426.92	3	4278.74	4279.75	-1	-1.3	109	Specific	197.56	103.71	103.71	2.82	51	>sp|Q9BY67|CADM1_HUMAN Cell adhesion molecule 1 OS=Homo sapiens GN=CADM1 PE=1 SV=2	2054	cacoP7gpep1.15613.15613.3	controllerType=0 controllerNumber=1 scan=15613	57.2845
14181:3	8	K.VSLTN[+2700.988]VSISDEGR.Y	HexNAc(5)Hex(5)Fuc(4)NeuAc(1)	N[+2701]	1360.24	3	4078.7	4077.69	1	0.7	109	Specific	200.77	118.78	26.09	2.94	51	>sp|Q9BY67|CADM1_HUMAN Cell adhesion molecule 1 OS=Homo sapiens GN=CADM1 PE=1 SV=2	2054	cacoP7gpep1.12818.12818.3	controllerType=0 controllerNumber=1 scan=12818	43.3255
14617:3	8	K.VSLTN[+1540.529]VSISDEGR.Y	HexNAc(2)Hex(7)Fuc(0)NeuAc(0)	N[+1541]	973.082	3	2917.23	2917.23	0	0.4	109	Specific	205.63	159.26	159.26	2.3	51	>sp|Q9BY67|CADM1_HUMAN Cell adhesion molecule 1 OS=Homo sapiens GN=CADM1 PE=1 SV=2	2054	cacoP7gpep1.13174.13174.3	controllerType=0 controllerNumber=1 scan=13174	45.1196
17429:3	8	K.VSLTN[+3066.120]VSISDEGR.Y	HexNAc(6)Hex(6)Fuc(4)NeuAc(1)	N[+3066]	1481.95	3	4443.85	4442.82	1	5.5	109	Specific	205.63	122.06	122.06	3.15	51	>sp|Q9BY67|CADM1_HUMAN Cell adhesion molecule 1 OS=Homo sapiens GN=CADM1 PE=1 SV=2	2054	cacoP7gpep1.15325.15325.3	controllerType=0 controllerNumber=1 scan=15325	55.8407
14055:3	8	K.VSLTN[+3139.137]VSISDEGR.Y	HexNAc(7)Hex(7)Fuc(2)NeuAc(1)	N[+3139]	1505.97	3	4515.88	4515.84	0	9.9	109	Specific	207.89	102.89	10.45	2.44	51	>sp|Q9BY67|CADM1_HUMAN Cell adhesion molecule 1 OS=Homo sapiens GN=CADM1 PE=1 SV=2	2054	cacoP7gpep1.12717.12717.3	controllerType=0 controllerNumber=1 scan=12717	42.8171
23637:3	8	K.VSLTN[+3210.137]VSISDEGR.Y	HexNAc(6)Hex(6)Fuc(1)NeuAc(3)	N[+3210]	1529.28	3	4585.83	4586.84	-1	-1.4	109	Specific	214.93	130.46	130.46	2.92	51	>sp|Q9BY67|CADM1_HUMAN Cell adhesion molecule 1 OS=Homo sapiens GN=CADM1 PE=1 SV=2	2054	cacoP7gpep1.24669.24669.3	controllerType=0 controllerNumber=1 scan=24669	97.0979
17227:3	8	K.VSLTN[+3139.137]VSISDEGR.Y	HexNAc(7)Hex(7)Fuc(2)NeuAc(1)	N[+3139]	1505.96	3	4515.87	4515.84	0	6	109	Specific	217.26	57.17	22.13	2.07	51	>sp|Q9BY67|CADM1_HUMAN Cell adhesion molecule 1 OS=Homo sapiens GN=CADM1 PE=1 SV=2	2054	cacoP7gpep1.15165.15165.3	controllerType=0 controllerNumber=1 scan=15165	55.0426
17433:4	8	K.VSLTN[+2774.004]VSISDEGR.Y	HexNAc(6)Hex(6)Fuc(2)NeuAc(1)	N[+2774]	1038.43	4	4150.72	4150.71	0	2.3	109	Specific	221.18	123.45	21.4	4.95	51	>sp|Q9BY67|CADM1_HUMAN Cell adhesion molecule 1 OS=Homo sapiens GN=CADM1 PE=1 SV=2	2054	cacoP7gpep1.15328.15328.4	controllerType=0 controllerNumber=1 scan=15328	55.8529
23563:4	8	K.VSLTN[+3575.270]VSISDEGR.Y	HexNAc(7)Hex(7)Fuc(1)NeuAc(3)	N[+3575]	1238.5	4	4950.99	4951.97	-1	3.8	109	Specific	234.36	126.3	126.3	4.95	51	>sp|Q9BY67|CADM1_HUMAN Cell adhesion molecule 1 OS=Homo sapiens GN=CADM1 PE=1 SV=2	2054	cacoP7gpep1.24209.24209.4	controllerType=0 controllerNumber=1 scan=24209	95.0622
17942:3	8	K.VSLTN[+2409.893]VSISDEGR.Y	HexNAc(5)Hex(5)Fuc(4)NeuAc(0)	N[+2410]	1262.88	3	3786.62	3786.59	0	5.9	109	Specific	236.14	118.28	118.28	5.01	51	>sp|Q9BY67|CADM1_HUMAN Cell adhesion molecule 1 OS=Homo sapiens GN=CADM1 PE=1 SV=2	2054	cacoP7gpep1.15726.15726.3	controllerType=0 controllerNumber=1 scan=15726	57.8467
17768:4	8	K.VSLTN[+2627.947]VSISDEGR.Y	HexNAc(6)Hex(6)Fuc(1)NeuAc(1)	N[+2628]	1001.92	4	4004.66	4004.65	0	3.2	109	Specific	243.15	97.2	18.9	4.62	51	>sp|Q9BY67|CADM1_HUMAN Cell adhesion molecule 1 OS=Homo sapiens GN=CADM1 PE=1 SV=2	2054	cacoP7gpep1.15587.15587.4	controllerType=0 controllerNumber=1 scan=15587	57.1508
14242:3	8	K.VSLTN[+2627.947]VSISDEGR.Y	HexNAc(6)Hex(6)Fuc(1)NeuAc(1)	N[+2628]	1335.89	3	4005.65	4004.65	1	-0.2	109	Specific	243.39	154.45	29.4	5.2	51	>sp|Q9BY67|CADM1_HUMAN Cell adhesion molecule 1 OS=Homo sapiens GN=CADM1 PE=1 SV=2	2054	cacoP7gpep1.12871.12871.3	controllerType=0 controllerNumber=1 scan=12871	43.5888
14078:3	8	K.VSLTN[+3139.137]VSISDEGR.Y	HexNAc(7)Hex(7)Fuc(2)NeuAc(1)	N[+3139]	1506.3	3	4516.87	4515.84	1	6.8	109	Specific	244.85	147.55	11.36	5.23	51	>sp|Q9BY67|CADM1_HUMAN Cell adhesion molecule 1 OS=Homo sapiens GN=CADM1 PE=1 SV=2	2054	cacoP7gpep1.12736.12736.3	controllerType=0 controllerNumber=1 scan=12736	42.9125
14284:3	8	K.VSLTN[+2627.947]VSISDEGR.Y	HexNAc(6)Hex(6)Fuc(1)NeuAc(1)	N[+2628]	1335.9	3	4005.68	4004.65	1	7.9	109	Specific	246.83	140.49	12.97	5.31	51	>sp|Q9BY67|CADM1_HUMAN Cell adhesion molecule 1 OS=Homo sapiens GN=CADM1 PE=1 SV=2	2054	cacoP7gpep1.12908.12908.3	controllerType=0 controllerNumber=1 scan=12908	43.7736
17408:3	8	K.VSLTN[+2716.983]VSISDEGR.Y	HexNAc(5)Hex(6)Fuc(3)NeuAc(1)	N[+2717]	1365.57	3	4094.69	4093.68	1	1.4	109	Specific	249.78	163.88	163.88	5.63	51	>sp|Q9BY67|CADM1_HUMAN Cell adhesion molecule 1 OS=Homo sapiens GN=CADM1 PE=1 SV=2	2054	cacoP7gpep1.15310.15310.3	controllerType=0 controllerNumber=1 scan=15310	55.7632
17910:3	8	K.VSLTN[+2408.872]VSISDEGR.Y	HexNAc(5)Hex(5)Fuc(2)NeuAc(1)	N[+2409]	1262.53	3	3785.59	3785.57	0	3.5	109	Specific	250.88	128.56	128.56	5.37	51	>sp|Q9BY67|CADM1_HUMAN Cell adhesion molecule 1 OS=Homo sapiens GN=CADM1 PE=1 SV=2	2054	cacoP7gpep1.15700.15700.3	controllerType=0 controllerNumber=1 scan=15700	57.7214
14066:3	8	K.VSLTN[+2993.079]VSISDEGR.Y	HexNAc(7)Hex(7)Fuc(1)NeuAc(1)	N[+2993]	1457.61	3	4370.82	4369.78	1	8.1	109	Specific	256.44	154.82	12.62	5.31	51	>sp|Q9BY67|CADM1_HUMAN Cell adhesion molecule 1 OS=Homo sapiens GN=CADM1 PE=1 SV=2	2054	cacoP7gpep1.12727.12727.3	controllerType=0 controllerNumber=1 scan=12727	42.8675
21548:3	8	K.VSLTN[+2715.963]VSISDEGR.Y	HexNAc(5)Hex(6)Fuc(1)NeuAc(2)	N[+2716]	1364.56	3	4091.67	4092.66	-1	2	109	Specific	258.45	141.61	141.61	5.57	51	>sp|Q9BY67|CADM1_HUMAN Cell adhesion molecule 1 OS=Homo sapiens GN=CADM1 PE=1 SV=2	2054	cacoP7gpep1.18976.18976.3	controllerType=0 controllerNumber=1 scan=18976	72.8964
23559:4	8	K.VSLTN[+3575.270]VSISDEGR.Y	HexNAc(7)Hex(7)Fuc(1)NeuAc(3)	N[+3575]	1238.5	4	4950.98	4951.97	-1	2.2	109	Specific	268.38	155.94	155.94	5.13	51	>sp|Q9BY67|CADM1_HUMAN Cell adhesion molecule 1 OS=Homo sapiens GN=CADM1 PE=1 SV=2	2054	cacoP7gpep1.24162.24162.4	controllerType=0 controllerNumber=1 scan=24162	94.8603
23532:3	8	K.VSLTN[+3210.137]VSISDEGR.Y	HexNAc(6)Hex(6)Fuc(1)NeuAc(3)	N[+3210]	1529.29	3	4585.85	4586.84	-1	3	109	Specific	289.02	106.38	106.38	5.48	51	>sp|Q9BY67|CADM1_HUMAN Cell adhesion molecule 1 OS=Homo sapiens GN=CADM1 PE=1 SV=2	2054	cacoP7gpep1.24076.24076.3	controllerType=0 controllerNumber=1 scan=24076	94.5084
21815:3	8	K.VSLTN[+2553.910]VSISDEGR.Y	HexNAc(5)Hex(5)Fuc(1)NeuAc(2)	N[+2554]	1310.88	3	3930.62	3930.61	0	1.2	109	Specific	291.77	152.35	152.35	5.54	51	>sp|Q9BY67|CADM1_HUMAN Cell adhesion molecule 1 OS=Homo sapiens GN=CADM1 PE=1 SV=2	2054	cacoP7gpep1.19387.19387.3	controllerType=0 controllerNumber=1 scan=19387	74.5743
17472:3	8	K.VSLTN[+2570.925]VSISDEGR.Y	HexNAc(5)Hex(6)Fuc(2)NeuAc(1)	N[+2571]	1316.55	3	3947.64	3947.63	0	3.7	109	Specific	293.3	172.2	172.2	5.69	51	>sp|Q9BY67|CADM1_HUMAN Cell adhesion molecule 1 OS=Homo sapiens GN=CADM1 PE=1 SV=2	2054	cacoP7gpep1.15360.15360.3	controllerType=0 controllerNumber=1 scan=15360	56.0145
17496:3	8	K.VSLTN[+2409.893]VSISDEGR.Y	HexNAc(5)Hex(5)Fuc(4)NeuAc(0)	N[+2410]	1262.88	3	3786.62	3786.59	0	6.3	109	Specific	293.69	162.15	162.15	5.51	51	>sp|Q9BY67|CADM1_HUMAN Cell adhesion molecule 1 OS=Homo sapiens GN=CADM1 PE=1 SV=2	2054	cacoP7gpep1.15375.15375.3	controllerType=0 controllerNumber=1 scan=15375	56.0918
21788:3	8	K.VSLTN[+2553.910]VSISDEGR.Y	HexNAc(5)Hex(5)Fuc(1)NeuAc(2)	N[+2554]	1310.89	3	3930.65	3930.61	0	8.7	109	Specific	294.69	155.24	155.24	5.03	51	>sp|Q9BY67|CADM1_HUMAN Cell adhesion molecule 1 OS=Homo sapiens GN=CADM1 PE=1 SV=2	2054	cacoP7gpep1.19347.19347.3	controllerType=0 controllerNumber=1 scan=19347	74.4077
17583:3	8	K.VSLTN[+2920.062]VSISDEGR.Y	HexNAc(6)Hex(6)Fuc(3)NeuAc(1)	N[+2920]	1432.94	3	4296.8	4296.76	0	8.6	109	Specific	294.78	136.15	22.67	4.98	51	>sp|Q9BY67|CADM1_HUMAN Cell adhesion molecule 1 OS=Homo sapiens GN=CADM1 PE=1 SV=2	2054	cacoP7gpep1.15449.15449.3	controllerType=0 controllerNumber=1 scan=15449	56.4599
21547:3	8	K.VSLTN[+2716.983]VSISDEGR.Y	HexNAc(5)Hex(6)Fuc(3)NeuAc(1)	N[+2717]	1364.91	3	4092.71	4093.68	-1	7.2	109	Specific	296.84	130.84	130.84	5.39	51	>sp|Q9BY67|CADM1_HUMAN Cell adhesion molecule 1 OS=Homo sapiens GN=CADM1 PE=1 SV=2	2054	cacoP7gpep1.18973.18973.3	controllerType=0 controllerNumber=1 scan=18973	72.8848
21507:3	8	K.VSLTN[+2919.042]VSISDEGR.Y	HexNAc(6)Hex(6)Fuc(1)NeuAc(2)	N[+2919]	1432.26	3	4294.78	4295.74	-1	8.3	109	Specific	308.26	148.24	148.24	5.17	51	>sp|Q9BY67|CADM1_HUMAN Cell adhesion molecule 1 OS=Homo sapiens GN=CADM1 PE=1 SV=2	2054	cacoP7gpep1.18921.18921.3	controllerType=0 controllerNumber=1 scan=18921	72.6559
21669:3	8	K.VSLTN[+2553.910]VSISDEGR.Y	HexNAc(5)Hex(5)Fuc(1)NeuAc(2)	N[+2554]	1310.89	3	3930.65	3930.61	0	9.6	109	Specific	309.31	149.62	149.62	4.87	51	>sp|Q9BY67|CADM1_HUMAN Cell adhesion molecule 1 OS=Homo sapiens GN=CADM1 PE=1 SV=2	2054	cacoP7gpep1.19149.19149.3	controllerType=0 controllerNumber=1 scan=19149	73.5991
14818:3	8	K.VSLTN[+2756.989]VSISDEGR.Y	HexNAc(6)Hex(5)Fuc(1)NeuAc(2)	N[+2757]	1378.56	3	4133.66	4133.69	0	-7	109	Specific	310.69	101.75	101.75	4.35	51	>sp|Q9BY67|CADM1_HUMAN Cell adhesion molecule 1 OS=Homo sapiens GN=CADM1 PE=1 SV=2	2054	cacoP7gpep1.13325.13325.3	controllerType=0 controllerNumber=1 scan=13325	45.8729
21403:3	8	K.VSLTN[+2715.963]VSISDEGR.Y	HexNAc(5)Hex(6)Fuc(1)NeuAc(2)	N[+2716]	1364.57	3	4091.69	4092.66	-1	6.2	109	Specific	313.62	158.46	158.46	5.47	51	>sp|Q9BY67|CADM1_HUMAN Cell adhesion molecule 1 OS=Homo sapiens GN=CADM1 PE=1 SV=2	2054	cacoP7gpep1.18832.18832.3	controllerType=0 controllerNumber=1 scan=18832	72.2472
17757:3	8	K.VSLTN[+2921.083]VSISDEGR.Y	HexNAc(6)Hex(6)Fuc(5)NeuAc(0)	N[+2921]	1432.94	3	4296.81	4297.78	-1	6.1	109	Specific	325.76	122.37	122.37	5.73	51	>sp|Q9BY67|CADM1_HUMAN Cell adhesion molecule 1 OS=Homo sapiens GN=CADM1 PE=1 SV=2	2054	cacoP7gpep1.15579.15579.3	controllerType=0 controllerNumber=1 scan=15579	57.1117
17495:3	8	K.VSLTN[+2408.872]VSISDEGR.Y	HexNAc(5)Hex(5)Fuc(2)NeuAc(1)	N[+2409]	1262.53	3	3785.58	3785.57	0	1.9	109	Specific	328.7	162.48	162.48	5.91	51	>sp|Q9BY67|CADM1_HUMAN Cell adhesion molecule 1 OS=Homo sapiens GN=CADM1 PE=1 SV=2	2054	cacoP7gpep1.15375.15375.3	controllerType=0 controllerNumber=1 scan=15375	56.0918
14491:3	8	K.VSLTN[+1864.634]VSISDEGR.Y	HexNAc(2)Hex(9)Fuc(0)NeuAc(0)	N[+1865]	1081.12	3	3241.34	3241.34	0	1.5	109	Specific	331.28	193	193	5.96	51	>sp|Q9BY67|CADM1_HUMAN Cell adhesion molecule 1 OS=Homo sapiens GN=CADM1 PE=1 SV=2	2054	cacoP7gpep1.13068.13068.3	controllerType=0 controllerNumber=1 scan=13068	44.5846
21556:3	8	K.VSLTN[+2715.963]VSISDEGR.Y	HexNAc(5)Hex(6)Fuc(1)NeuAc(2)	N[+2716]	1364.56	3	4091.67	4092.66	-1	1	109	Specific	331.33	125.15	125.15	5.72	51	>sp|Q9BY67|CADM1_HUMAN Cell adhesion molecule 1 OS=Homo sapiens GN=CADM1 PE=1 SV=2	2054	cacoP7gpep1.18986.18986.3	controllerType=0 controllerNumber=1 scan=18986	72.9361
14554:3	8	K.VSLTN[+1702.581]VSISDEGR.Y	HexNAc(2)Hex(8)Fuc(0)NeuAc(0)	N[+1703]	1027.1	3	3079.29	3079.28	0	3.4	109	Specific	333.66	241.3	241.3	5.94	51	>sp|Q9BY67|CADM1_HUMAN Cell adhesion molecule 1 OS=Homo sapiens GN=CADM1 PE=1 SV=2	2054	cacoP7gpep1.13118.13118.3	controllerType=0 controllerNumber=1 scan=13118	44.8378
14480:3	8	K.VSLTN[+2026.687]VSISDEGR.Y	HexNAc(2)Hex(10)Fuc(0)NeuAc(0)	N[+2027]	1135.14	3	3403.4	3403.39	0	4.5	109	Specific	334.18	211.68	211.68	5.97	51	>sp|Q9BY67|CADM1_HUMAN Cell adhesion molecule 1 OS=Homo sapiens GN=CADM1 PE=1 SV=2	2054	cacoP7gpep1.13060.13060.3	controllerType=0 controllerNumber=1 scan=13060	44.5341
14435:3	8	K.VSLTN[+2772.984]VSISDEGR.Y	HexNAc(6)Hex(6)Fuc(0)NeuAc(2)	N[+2773]	1383.56	3	4148.66	4149.69	-1	-6.3	109	Specific	335.39	183.42	183.42	4.85	51	>sp|Q9BY67|CADM1_HUMAN Cell adhesion molecule 1 OS=Homo sapiens GN=CADM1 PE=1 SV=2	2054	cacoP7gpep1.13028.13028.3	controllerType=0 controllerNumber=1 scan=13028	44.3765
14225:3	8	K.VSLTN[+2774.004]VSISDEGR.Y	HexNAc(6)Hex(6)Fuc(2)NeuAc(1)	N[+2774]	1384.58	3	4151.73	4150.71	1	5.9	109	Specific	337.32	209.29	12.1	5.92	51	>sp|Q9BY67|CADM1_HUMAN Cell adhesion molecule 1 OS=Homo sapiens GN=CADM1 PE=1 SV=2	2054	cacoP7gpep1.12857.12857.3	controllerType=0 controllerNumber=1 scan=12857	43.5169
14632:3	8	K.VSLTN[+1971.719]VSISDEGR.Y	HexNAc(5)Hex(5)Fuc(1)NeuAc(0)	N[+1972]	1116.82	3	3348.44	3348.42	0	4.8	109	Specific	337.36	153.65	153.65	5.71	51	>sp|Q9BY67|CADM1_HUMAN Cell adhesion molecule 1 OS=Homo sapiens GN=CADM1 PE=1 SV=2	2054	cacoP7gpep1.13185.13185.3	controllerType=0 controllerNumber=1 scan=13185	45.1759
14436:3	8	K.VSLTN[+2774.004]VSISDEGR.Y	HexNAc(6)Hex(6)Fuc(2)NeuAc(1)	N[+2774]	1384.25	3	4150.74	4150.71	0	8.4	109	Specific	365.05	179.28	15.98	5.4	51	>sp|Q9BY67|CADM1_HUMAN Cell adhesion molecule 1 OS=Homo sapiens GN=CADM1 PE=1 SV=2	2054	cacoP7gpep1.13028.13028.3	controllerType=0 controllerNumber=1 scan=13028	44.3765
21472:3	8	K.VSLTN[+2553.910]VSISDEGR.Y	HexNAc(5)Hex(5)Fuc(1)NeuAc(2)	N[+2554]	1310.88	3	3930.63	3930.61	0	5.8	109	Specific	368.34	172.48	172.48	5.86	51	>sp|Q9BY67|CADM1_HUMAN Cell adhesion molecule 1 OS=Homo sapiens GN=CADM1 PE=1 SV=2	2054	cacoP7gpep1.18892.18892.3	controllerType=0 controllerNumber=1 scan=18892	72.5221
14588:3	8	K.VSLTN[+2482.909]VSISDEGR.Y	HexNAc(6)Hex(6)Fuc(2)NeuAc(0)	N[+2483]	1287.22	3	3859.63	3859.61	0	5.8	109	Specific	385.85	240.88	240.88	5.97	51	>sp|Q9BY67|CADM1_HUMAN Cell adhesion molecule 1 OS=Homo sapiens GN=CADM1 PE=1 SV=2	2054	cacoP7gpep1.13149.13149.3	controllerType=0 controllerNumber=1 scan=13149	44.9903
17549:3	8	K.VSLTN[+2627.947]VSISDEGR.Y	HexNAc(6)Hex(6)Fuc(1)NeuAc(1)	N[+2628]	1335.56	3	4004.67	4004.65	0	5.8	109	Specific	389.42	168.11	21.06	5.91	51	>sp|Q9BY67|CADM1_HUMAN Cell adhesion molecule 1 OS=Homo sapiens GN=CADM1 PE=1 SV=2	2054	cacoP7gpep1.15419.15419.3	controllerType=0 controllerNumber=1 scan=15419	56.3108
17701:3	8	K.VSLTN[+2408.872]VSISDEGR.Y	HexNAc(5)Hex(5)Fuc(2)NeuAc(1)	N[+2409]	1262.54	3	3785.59	3785.57	0	5.1	109	Specific	395.23	190.63	190.63	6.01	51	>sp|Q9BY67|CADM1_HUMAN Cell adhesion molecule 1 OS=Homo sapiens GN=CADM1 PE=1 SV=2	2054	cacoP7gpep1.15539.15539.3	controllerType=0 controllerNumber=1 scan=15539	56.9099
14569:3	8	K.VSLTN[+2627.947]VSISDEGR.Y	HexNAc(6)Hex(6)Fuc(1)NeuAc(1)	N[+2628]	1335.56	3	4004.68	4004.65	0	6.8	109	Specific	396.04	177.65	14.46	5.75	51	>sp|Q9BY67|CADM1_HUMAN Cell adhesion molecule 1 OS=Homo sapiens GN=CADM1 PE=1 SV=2	2054	cacoP7gpep1.13129.13129.3	controllerType=0 controllerNumber=1 scan=13129	44.8896
17630:3	8	K.VSLTN[+2424.867]VSISDEGR.Y	HexNAc(5)Hex(6)Fuc(1)NeuAc(1)	N[+2425]	1267.86	3	3801.57	3801.57	0	-0.1	109	Specific	408.52	181.94	181.94	5.75	51	>sp|Q9BY67|CADM1_HUMAN Cell adhesion molecule 1 OS=Homo sapiens GN=CADM1 PE=1 SV=2	2054	cacoP7gpep1.15485.15485.3	controllerType=0 controllerNumber=1 scan=15485	56.6406
17527:3	8	K.VSLTN[+2627.947]VSISDEGR.Y	HexNAc(6)Hex(6)Fuc(1)NeuAc(1)	N[+2628]	1335.56	3	4004.66	4004.65	0	4.1	109	Specific	408.89	210.41	21.84	6	51	>sp|Q9BY67|CADM1_HUMAN Cell adhesion molecule 1 OS=Homo sapiens GN=CADM1 PE=1 SV=2	2054	cacoP7gpep1.15403.15403.3	controllerType=0 controllerNumber=1 scan=15403	56.2319
14558:3	8	K.VSLTN[+2336.851]VSISDEGR.Y	HexNAc(6)Hex(6)Fuc(1)NeuAc(0)	N[+2337]	1238.52	3	3713.55	3713.55	0	-1.4	109	Specific	438.38	236.18	236.18	5.67	51	>sp|Q9BY67|CADM1_HUMAN Cell adhesion molecule 1 OS=Homo sapiens GN=CADM1 PE=1 SV=2	2054	cacoP7gpep1.13121.13121.3	controllerType=0 controllerNumber=1 scan=13121	44.8509
14470:3	8	K.VSLTN[+2482.909]VSISDEGR.Y	HexNAc(6)Hex(6)Fuc(2)NeuAc(0)	N[+2483]	1287.22	3	3859.63	3859.61	0	5.9	109	Specific	457.27	255.09	255.09	6.17	51	>sp|Q9BY67|CADM1_HUMAN Cell adhesion molecule 1 OS=Homo sapiens GN=CADM1 PE=1 SV=2	2054	cacoP7gpep1.13052.13052.3	controllerType=0 controllerNumber=1 scan=13052	44.4949
17444:3	8	K.VSLTN[+2774.004]VSISDEGR.Y	HexNAc(6)Hex(6)Fuc(2)NeuAc(1)	N[+2774]	1384.24	3	4150.72	4150.71	0	2.3	109	Specific	459.91	255.72	30.26	6.31	51	>sp|Q9BY67|CADM1_HUMAN Cell adhesion molecule 1 OS=Homo sapiens GN=CADM1 PE=1 SV=2	2054	cacoP7gpep1.15338.15338.3	controllerType=0 controllerNumber=1 scan=15338	55.9031
17742:3	8	K.VSLTN[+2627.947]VSISDEGR.Y	HexNAc(6)Hex(6)Fuc(1)NeuAc(1)	N[+2628]	1335.56	3	4004.66	4004.65	0	3.5	109	Specific	527.08	294.13	26.22	6.62	51	>sp|Q9BY67|CADM1_HUMAN Cell adhesion molecule 1 OS=Homo sapiens GN=CADM1 PE=1 SV=2	2054	cacoP7gpep1.15567.15567.3	controllerType=0 controllerNumber=1 scan=15567	57.0501
14507:2	8	K.VSLTN[+1864.634]VSISDEGR.Y	HexNAc(2)Hex(9)Fuc(0)NeuAc(0)	N[+1865]	1621.18	2	3241.35	3241.34	0	4.7	109	Specific	529.29	395.09	395.09	8.66	51	>sp|Q9BY67|CADM1_HUMAN Cell adhesion molecule 1 OS=Homo sapiens GN=CADM1 PE=1 SV=2	2054	cacoP7gpep1.13081.13081.2	controllerType=0 controllerNumber=1 scan=13081	44.6521
17622:3	8	K.VSLTN[+2774.004]VSISDEGR.Y	HexNAc(6)Hex(6)Fuc(2)NeuAc(1)	N[+2774]	1384.25	3	4150.73	4150.71	0	4.9	109	Specific	533.98	311.53	23.55	6.77	51	>sp|Q9BY67|CADM1_HUMAN Cell adhesion molecule 1 OS=Homo sapiens GN=CADM1 PE=1 SV=2	2054	cacoP7gpep1.15479.15479.3	controllerType=0 controllerNumber=1 scan=15479	56.6084
14545:2	8	K.VSLTN[+1702.581]VSISDEGR.Y	HexNAc(2)Hex(8)Fuc(0)NeuAc(0)	N[+1703]	1540.16	2	3079.3	3079.28	0	6.7	109	Specific	573.91	437.77	437.77	8.67	51	>sp|Q9BY67|CADM1_HUMAN Cell adhesion molecule 1 OS=Homo sapiens GN=CADM1 PE=1 SV=2	2054	cacoP7gpep1.13111.13111.2	controllerType=0 controllerNumber=1 scan=13111	44.8041
04825:3	9	R.LKPLFN[+1378.476]K.S	HexNAc(2)Hex(6)Fuc(0)NeuAc(0)	N[+1378]	746.678	3	2238.02	2238.02	0	2.2	52	Specific	251.63	239.54	239.54	4.68	32	>sp|P20645|MPRD_HUMAN Cation-dependent mannose-6-phosphate receptor OS=Homo sapiens GN=M6PR PE=1 SV=1	10570	cacoP7gpep1.5630.5630.3	controllerType=0 controllerNumber=1 scan=5630	19.6305
04522:3	9	R.LKPLFN[+1864.634]K.S	HexNAc(2)Hex(9)Fuc(0)NeuAc(0)	N[+1865]	908.734	3	2724.19	2724.17	0	4.4	52	Specific	279.01	274.61	274.61	4.78	32	>sp|P20645|MPRD_HUMAN Cation-dependent mannose-6-phosphate receptor OS=Homo sapiens GN=M6PR PE=1 SV=1	10570	cacoP7gpep1.5403.5403.3	controllerType=0 controllerNumber=1 scan=5403	18.9646
04498:3	9	R.LKPLFN[+1702.581]K.S	HexNAc(2)Hex(8)Fuc(0)NeuAc(0)	N[+1703]	854.715	3	2562.13	2562.12	0	3.3	52	Specific	308.52	280.26	280.26	4.93	32	>sp|P20645|MPRD_HUMAN Cation-dependent mannose-6-phosphate receptor OS=Homo sapiens GN=M6PR PE=1 SV=1	10570	cacoP7gpep1.5385.5385.3	controllerType=0 controllerNumber=1 scan=5385	18.9095
04630:3	9	R.LKPLFN[+1540.529]K.S	HexNAc(2)Hex(7)Fuc(0)NeuAc(0)	N[+1541]	800.696	3	2400.07	2400.07	0	2.2	52	Specific	332.45	272.38	272.38	5.09	32	>sp|P20645|MPRD_HUMAN Cation-dependent mannose-6-phosphate receptor OS=Homo sapiens GN=M6PR PE=1 SV=1	10570	cacoP7gpep1.5482.5482.3	controllerType=0 controllerNumber=1 scan=5482	19.2041
04661:2	9	R.LKPLFN[+1540.529]K.S	HexNAc(2)Hex(7)Fuc(0)NeuAc(0)	N[+1541]	1200.54	2	2400.08	2400.07	0	3.9	52	Specific	381.09	254.62	254.62	4.55	32	>sp|P20645|MPRD_HUMAN Cation-dependent mannose-6-phosphate receptor OS=Homo sapiens GN=M6PR PE=1 SV=1	10570	cacoP7gpep1.5504.5504.2	controllerType=0 controllerNumber=1 scan=5504	19.2796
04652:2	9	R.LKPLFN[+1540.529]K.S	HexNAc(2)Hex(7)Fuc(0)NeuAc(0)	N[+1541]	1200.55	2	2400.08	2400.07	0	6.4	52	Specific	392.45	277.29	277.29	4.47	32	>sp|P20645|MPRD_HUMAN Cation-dependent mannose-6-phosphate receptor OS=Homo sapiens GN=M6PR PE=1 SV=1	10570	cacoP7gpep1.5498.5498.2	controllerType=0 controllerNumber=1 scan=5498	19.2611
04524:2	9	R.LKPLFN[+1702.581]K.S	HexNAc(2)Hex(8)Fuc(0)NeuAc(0)	N[+1703]	1281.57	2	2562.13	2562.12	0	3.2	52	Specific	405.2	178.27	178.27	4.47	32	>sp|P20645|MPRD_HUMAN Cation-dependent mannose-6-phosphate receptor OS=Homo sapiens GN=M6PR PE=1 SV=1	10570	cacoP7gpep1.5404.5404.2	controllerType=0 controllerNumber=1 scan=5404	18.9669
04511:2	9	R.LKPLFN[+1702.581]K.S	HexNAc(2)Hex(8)Fuc(0)NeuAc(0)	N[+1703]	1281.57	2	2562.13	2562.12	0	2.6	52	Specific	407.35	193.24	193.24	4.62	32	>sp|P20645|MPRD_HUMAN Cation-dependent mannose-6-phosphate receptor OS=Homo sapiens GN=M6PR PE=1 SV=1	10570	cacoP7gpep1.5395.5395.2	controllerType=0 controllerNumber=1 scan=5395	18.9433
10301:3	9	R.EAGN[+2628.967]HTSGAGLVQINK.S	HexNAc(6)Hex(6)Fuc(3)NeuAc(0)	N[+2629]	1409.26	3	4225.77	4224.78	1	-3.4	80	Specific	181.1	129.27	23.4	3.44	32	>sp|P20645|MPRD_HUMAN Cation-dependent mannose-6-phosphate receptor OS=Homo sapiens GN=M6PR PE=1 SV=1	10570	cacoP7gpep1.9755.9755.3	controllerType=0 controllerNumber=1 scan=9755	31.0111
06877:3	9	R.EAGN[+1971.719]HTSGAGLVQINK.S	HexNAc(5)Hex(5)Fuc(1)NeuAc(0)	N[+1972]	1189.86	3	3567.55	3567.53	0	5.4	80	Specific	190.49	67.4	31.69	2.01	32	>sp|P20645|MPRD_HUMAN Cation-dependent mannose-6-phosphate receptor OS=Homo sapiens GN=M6PR PE=1 SV=1	10570	cacoP7gpep1.7102.7102.3	controllerType=0 controllerNumber=1 scan=7102	23.283
10141:4	9	R.EAGN[+2774.004]HTSGAGLVQINK.S	HexNAc(6)Hex(6)Fuc(2)NeuAc(1)	N[+2774]	1092.96	4	4368.83	4369.82	-1	3.6	80	Specific	217.34	63.69	22.18	3.18	32	>sp|P20645|MPRD_HUMAN Cation-dependent mannose-6-phosphate receptor OS=Homo sapiens GN=M6PR PE=1 SV=1	10570	cacoP7gpep1.9626.9626.4	controllerType=0 controllerNumber=1 scan=9626	30.5977
10276:3	9	R.EAGN[+2774.004]HTSGAGLVQINK.S	HexNAc(6)Hex(6)Fuc(2)NeuAc(1)	N[+2774]	1457.28	3	4369.82	4369.82	0	0.9	80	Specific	251.21	80.93	25.73	5.65	32	>sp|P20645|MPRD_HUMAN Cation-dependent mannose-6-phosphate receptor OS=Homo sapiens GN=M6PR PE=1 SV=1	10570	cacoP7gpep1.9731.9731.3	controllerType=0 controllerNumber=1 scan=9731	30.9331
05694:3	9	R.EAGN[+2026.687]HTSGAGLVQINK.S	HexNAc(2)Hex(10)Fuc(0)NeuAc(0)	N[+2027]	1208.18	3	3622.52	3622.5	0	4.2	80	Specific	265.28	72.92	32	5.49	32	>sp|P20645|MPRD_HUMAN Cation-dependent mannose-6-phosphate receptor OS=Homo sapiens GN=M6PR PE=1 SV=1	10570	cacoP7gpep1.6249.6249.3	controllerType=0 controllerNumber=1 scan=6249	21.211
13297:3	9	R.EAGN[+2862.021]HTSGAGLVQINK.S	HexNAc(5)Hex(6)Fuc(2)NeuAc(2)	N[+2862]	1486.29	3	4456.86	4457.83	-1	6.9	80	Specific	268.86	140.04	36.33	6.08	32	>sp|P20645|MPRD_HUMAN Cation-dependent mannose-6-phosphate receptor OS=Homo sapiens GN=M6PR PE=1 SV=1	10570	cacoP7gpep1.12145.12145.3	controllerType=0 controllerNumber=1 scan=12145	40.0907
07203:3	9	R.EAGN[+2921.083]HTSGAGLVQINK.S	HexNAc(6)Hex(6)Fuc(5)NeuAc(0)	N[+2921]	1506.64	3	4517.92	4516.9	1	4.4	80	Specific	273.44	231.87	40.4	6.39	32	>sp|P20645|MPRD_HUMAN Cation-dependent mannose-6-phosphate receptor OS=Homo sapiens GN=M6PR PE=1 SV=1	10570	cacoP7gpep1.7347.7347.3	controllerType=0 controllerNumber=1 scan=7347	23.9813
16647:3	9	R.EAGN[+3007.058]HTSGAGLVQINK.S	HexNAc(5)Hex(6)Fuc(1)NeuAc(3)	N[+3007]	1534.97	3	4602.91	4602.87	0	7.7	80	Specific	279.4	142.29	27.75	6.05	32	>sp|P20645|MPRD_HUMAN Cation-dependent mannose-6-phosphate receptor OS=Homo sapiens GN=M6PR PE=1 SV=1	10570	cacoP7gpep1.14728.14728.3	controllerType=0 controllerNumber=1 scan=14728	52.8557
10322:3	9	R.EAGN[+2408.872]HTSGAGLVQINK.S	HexNAc(5)Hex(5)Fuc(2)NeuAc(1)	N[+2409]	1335.9	3	4005.69	4004.69	1	-1	80	Specific	306.24	95.95	18.22	5.38	32	>sp|P20645|MPRD_HUMAN Cation-dependent mannose-6-phosphate receptor OS=Homo sapiens GN=M6PR PE=1 SV=1	10570	cacoP7gpep1.9775.9775.3	controllerType=0 controllerNumber=1 scan=9775	31.0764
06478:3	9	R.EAGN[+2117.777]HTSGAGLVQINK.S	HexNAc(5)Hex(5)Fuc(2)NeuAc(0)	N[+2118]	1238.54	3	3713.6	3713.59	0	2.4	80	Specific	312.14	173.39	34.02	5.8	32	>sp|P20645|MPRD_HUMAN Cation-dependent mannose-6-phosphate receptor OS=Homo sapiens GN=M6PR PE=1 SV=1	10570	cacoP7gpep1.6805.6805.3	controllerType=0 controllerNumber=1 scan=6805	22.5735
06472:3	9	R.EAGN[+2775.025]HTSGAGLVQINK.S	HexNAc(6)Hex(6)Fuc(4)NeuAc(0)	N[+2775]	1457.96	3	4371.85	4370.84	1	2.4	80	Specific	330.53	176.53	45.55	6.75	32	>sp|P20645|MPRD_HUMAN Cation-dependent mannose-6-phosphate receptor OS=Homo sapiens GN=M6PR PE=1 SV=1	10570	cacoP7gpep1.6800.6800.3	controllerType=0 controllerNumber=1 scan=6800	22.5568
10396:3	9	R.EAGN[+2921.083]HTSGAGLVQINK.S	HexNAc(6)Hex(6)Fuc(5)NeuAc(0)	N[+2921]	1506.64	3	4517.91	4516.9	1	2.3	80	Specific	336.47	71.75	31.5	5.8	32	>sp|P20645|MPRD_HUMAN Cation-dependent mannose-6-phosphate receptor OS=Homo sapiens GN=M6PR PE=1 SV=1	10570	cacoP7gpep1.9837.9837.3	controllerType=0 controllerNumber=1 scan=9837	31.2765
16440:4	9	R.EAGN[+3210.137]HTSGAGLVQINK.S	HexNAc(6)Hex(6)Fuc(1)NeuAc(3)	N[+3210]	1202	4	4804.96	4805.95	-1	2.6	80	Specific	351.6	126.98	46.18	6.38	32	>sp|P20645|MPRD_HUMAN Cation-dependent mannose-6-phosphate receptor OS=Homo sapiens GN=M6PR PE=1 SV=1	10570	cacoP7gpep1.14577.14577.4	controllerType=0 controllerNumber=1 scan=14577	52.1047
06909:3	9	R.EAGN[+1971.719]HTSGAGLVQINK.S	HexNAc(5)Hex(5)Fuc(1)NeuAc(0)	N[+1972]	1189.85	3	3567.54	3567.53	0	3.4	80	Specific	352.77	248.85	48.51	6.69	32	>sp|P20645|MPRD_HUMAN Cation-dependent mannose-6-phosphate receptor OS=Homo sapiens GN=M6PR PE=1 SV=1	10570	cacoP7gpep1.7127.7127.3	controllerType=0 controllerNumber=1 scan=7127	23.3441
16670:3	9	R.EAGN[+3007.058]HTSGAGLVQINK.S	HexNAc(5)Hex(6)Fuc(1)NeuAc(3)	N[+3007]	1534.97	3	4602.89	4602.87	0	4.5	80	Specific	353.54	262.2	55.86	6.81	32	>sp|P20645|MPRD_HUMAN Cation-dependent mannose-6-phosphate receptor OS=Homo sapiens GN=M6PR PE=1 SV=1	10570	cacoP7gpep1.14745.14745.3	controllerType=0 controllerNumber=1 scan=14745	52.9403
07004:3	9	R.EAGN[+2482.909]HTSGAGLVQINK.S	HexNAc(6)Hex(6)Fuc(2)NeuAc(0)	N[+2483]	1360.58	3	4079.72	4078.72	1	-1.2	80	Specific	368.48	170.15	38.08	6.23	32	>sp|P20645|MPRD_HUMAN Cation-dependent mannose-6-phosphate receptor OS=Homo sapiens GN=M6PR PE=1 SV=1	10570	cacoP7gpep1.7193.7193.3	controllerType=0 controllerNumber=1 scan=7193	23.5327
06944:3	9	R.EAGN[+2117.777]HTSGAGLVQINK.S	HexNAc(5)Hex(5)Fuc(2)NeuAc(0)	N[+2118]	1238.54	3	3713.61	3713.59	0	4	80	Specific	376.59	181.16	43.32	6.7	32	>sp|P20645|MPRD_HUMAN Cation-dependent mannose-6-phosphate receptor OS=Homo sapiens GN=M6PR PE=1 SV=1	10570	cacoP7gpep1.7152.7152.3	controllerType=0 controllerNumber=1 scan=7152	23.412
10267:3	9	R.EAGN[+2262.814]HTSGAGLVQINK.S	HexNAc(5)Hex(5)Fuc(1)NeuAc(1)	N[+2263]	1286.88	3	3858.61	3858.63	0	-4.3	80	Specific	379.74	222.1	49.28	6.04	32	>sp|P20645|MPRD_HUMAN Cation-dependent mannose-6-phosphate receptor OS=Homo sapiens GN=M6PR PE=1 SV=1	10570	cacoP7gpep1.9724.9724.3	controllerType=0 controllerNumber=1 scan=9724	30.9111
05649:3	9	R.EAGN[+2026.687]HTSGAGLVQINK.S	HexNAc(2)Hex(10)Fuc(0)NeuAc(0)	N[+2027]	1208.17	3	3622.51	3622.5	0	1.6	80	Specific	381.19	97.68	39.75	6.06	32	>sp|P20645|MPRD_HUMAN Cation-dependent mannose-6-phosphate receptor OS=Homo sapiens GN=M6PR PE=1 SV=1	10570	cacoP7gpep1.6218.6218.3	controllerType=0 controllerNumber=1 scan=6218	21.131
05881:3	9	R.EAGN[+1540.529]HTSGAGLVQINK.S	HexNAc(2)Hex(7)Fuc(0)NeuAc(0)	N[+1541]	1046.12	3	3136.36	3136.34	0	4.1	80	Specific	390.77	160.96	50.81	6.7	32	>sp|P20645|MPRD_HUMAN Cation-dependent mannose-6-phosphate receptor OS=Homo sapiens GN=M6PR PE=1 SV=1	10570	cacoP7gpep1.6381.6381.3	controllerType=0 controllerNumber=1 scan=6381	21.5309
13501:4	9	R.EAGN[+2919.042]HTSGAGLVQINK.S	HexNAc(6)Hex(6)Fuc(1)NeuAc(2)	N[+2919]	1129.22	4	4513.86	4514.86	-1	2.8	80	Specific	396.51	205.85	61.55	6.76	32	>sp|P20645|MPRD_HUMAN Cation-dependent mannose-6-phosphate receptor OS=Homo sapiens GN=M6PR PE=1 SV=1	10570	cacoP7gpep1.12303.12303.4	controllerType=0 controllerNumber=1 scan=12303	40.8351
07020:3	9	R.EAGN[+2482.909]HTSGAGLVQINK.S	HexNAc(6)Hex(6)Fuc(2)NeuAc(0)	N[+2483]	1360.24	3	4078.72	4078.72	0	-0.8	80	Specific	397.62	164.2	41.38	6.28	32	>sp|P20645|MPRD_HUMAN Cation-dependent mannose-6-phosphate receptor OS=Homo sapiens GN=M6PR PE=1 SV=1	10570	cacoP7gpep1.7205.7205.3	controllerType=0 controllerNumber=1 scan=7205	23.5625
13240:3	9	R.EAGN[+2715.963]HTSGAGLVQINK.S	HexNAc(5)Hex(6)Fuc(1)NeuAc(2)	N[+2716]	1437.6	3	4310.8	4311.78	-1	5.9	80	Specific	418.24	251.18	79.95	6.83	32	>sp|P20645|MPRD_HUMAN Cation-dependent mannose-6-phosphate receptor OS=Homo sapiens GN=M6PR PE=1 SV=1	10570	cacoP7gpep1.12100.12100.3	controllerType=0 controllerNumber=1 scan=12100	39.8849
10302:3	9	R.EAGN[+2774.004]HTSGAGLVQINK.S	HexNAc(6)Hex(6)Fuc(2)NeuAc(1)	N[+2774]	1456.95	3	4368.85	4369.82	-1	8.2	80	Specific	419.5	181.11	38.13	6.36	32	>sp|P20645|MPRD_HUMAN Cation-dependent mannose-6-phosphate receptor OS=Homo sapiens GN=M6PR PE=1 SV=1	10570	cacoP7gpep1.9756.9756.3	controllerType=0 controllerNumber=1 scan=9756	31.0152
13457:3	9	R.EAGN[+2350.830]HTSGAGLVQINK.S	HexNAc(4)Hex(5)Fuc(1)NeuAc(2)	N[+2351]	1316.22	3	3946.65	3946.64	0	1.8	80	Specific	446.89	333	44.96	7.33	32	>sp|P20645|MPRD_HUMAN Cation-dependent mannose-6-phosphate receptor OS=Homo sapiens GN=M6PR PE=1 SV=1	10570	cacoP7gpep1.12270.12270.3	controllerType=0 controllerNumber=1 scan=12270	40.6799
07070:3	9	R.EAGN[+2775.025]HTSGAGLVQINK.S	HexNAc(6)Hex(6)Fuc(4)NeuAc(0)	N[+2775]	1457.63	3	4370.86	4370.84	0	6	80	Specific	453.29	267.83	49.37	7.04	32	>sp|P20645|MPRD_HUMAN Cation-dependent mannose-6-phosphate receptor OS=Homo sapiens GN=M6PR PE=1 SV=1	10570	cacoP7gpep1.7239.7239.3	controllerType=0 controllerNumber=1 scan=7239	23.6546
10235:3	9	R.EAGN[+2627.947]HTSGAGLVQINK.S	HexNAc(6)Hex(6)Fuc(1)NeuAc(1)	N[+2628]	1408.26	3	4222.77	4223.76	-1	2.5	80	Specific	460.9	239.7	61.34	7.18	32	>sp|P20645|MPRD_HUMAN Cation-dependent mannose-6-phosphate receptor OS=Homo sapiens GN=M6PR PE=1 SV=1	10570	cacoP7gpep1.9696.9696.3	controllerType=0 controllerNumber=1 scan=9696	30.8218
07029:3	9	R.EAGN[+2117.777]HTSGAGLVQINK.S	HexNAc(5)Hex(5)Fuc(2)NeuAc(0)	N[+2118]	1238.54	3	3713.59	3713.59	0	1.2	80	Specific	463.21	301.99	38.61	7.28	32	>sp|P20645|MPRD_HUMAN Cation-dependent mannose-6-phosphate receptor OS=Homo sapiens GN=M6PR PE=1 SV=1	10570	cacoP7gpep1.7211.7211.3	controllerType=0 controllerNumber=1 scan=7211	23.5753
05661:3	9	R.EAGN[+1864.634]HTSGAGLVQINK.S	HexNAc(2)Hex(9)Fuc(0)NeuAc(0)	N[+1865]	1154.16	3	3460.46	3460.45	0	3.5	80	Specific	463.84	244.83	64.13	6.98	32	>sp|P20645|MPRD_HUMAN Cation-dependent mannose-6-phosphate receptor OS=Homo sapiens GN=M6PR PE=1 SV=1	10570	cacoP7gpep1.6226.6226.3	controllerType=0 controllerNumber=1 scan=6226	21.1519
07136:3	9	R.EAGN[+2775.025]HTSGAGLVQINK.S	HexNAc(6)Hex(6)Fuc(4)NeuAc(0)	N[+2775]	1457.3	3	4369.87	4370.84	-1	8.3	80	Specific	479.12	258.68	58.27	6.61	32	>sp|P20645|MPRD_HUMAN Cation-dependent mannose-6-phosphate receptor OS=Homo sapiens GN=M6PR PE=1 SV=1	10570	cacoP7gpep1.7291.7291.3	controllerType=0 controllerNumber=1 scan=7291	23.8003
10300:3	9	R.EAGN[+2408.872]HTSGAGLVQINK.S	HexNAc(5)Hex(5)Fuc(2)NeuAc(1)	N[+2409]	1335.57	3	4004.7	4004.69	0	4.5	80	Specific	483.48	303.71	18.45	7.39	32	>sp|P20645|MPRD_HUMAN Cation-dependent mannose-6-phosphate receptor OS=Homo sapiens GN=M6PR PE=1 SV=1	10570	cacoP7gpep1.9754.9754.3	controllerType=0 controllerNumber=1 scan=9754	31.0056
07169:3	9	R.EAGN[+2482.909]HTSGAGLVQINK.S	HexNAc(6)Hex(6)Fuc(2)NeuAc(0)	N[+2483]	1360.26	3	4078.75	4078.72	0	7.2	80	Specific	487.7	382.8	37.84	8.9	32	>sp|P20645|MPRD_HUMAN Cation-dependent mannose-6-phosphate receptor OS=Homo sapiens GN=M6PR PE=1 SV=1	10570	cacoP7gpep1.7319.7319.3	controllerType=0 controllerNumber=1 scan=7319	23.8836
07176:3	9	R.EAGN[+2336.851]HTSGAGLVQINK.S	HexNAc(6)Hex(6)Fuc(1)NeuAc(0)	N[+2337]	1311.57	3	3932.7	3932.66	0	8.1	80	Specific	507.24	264.43	60.58	7.13	32	>sp|P20645|MPRD_HUMAN Cation-dependent mannose-6-phosphate receptor OS=Homo sapiens GN=M6PR PE=1 SV=1	10570	cacoP7gpep1.7325.7325.3	controllerType=0 controllerNumber=1 scan=7325	23.9036
05711:3	9	R.EAGN[+1702.581]HTSGAGLVQINK.S	HexNAc(2)Hex(8)Fuc(0)NeuAc(0)	N[+1703]	1100.14	3	3298.4	3298.39	0	1.6	80	Specific	507.87	425.46	84.44	9.08	32	>sp|P20645|MPRD_HUMAN Cation-dependent mannose-6-phosphate receptor OS=Homo sapiens GN=M6PR PE=1 SV=1	10570	cacoP7gpep1.6261.6261.3	controllerType=0 controllerNumber=1 scan=6261	21.2356
05988:3	9	R.EAGN[+1378.476]HTSGAGLVQINK.S	HexNAc(2)Hex(6)Fuc(0)NeuAc(0)	N[+1378]	992.104	3	2974.3	2974.29	0	3	80	Specific	519.22	275.22	92.11	7.35	32	>sp|P20645|MPRD_HUMAN Cation-dependent mannose-6-phosphate receptor OS=Homo sapiens GN=M6PR PE=1 SV=1	10570	cacoP7gpep1.6457.6457.3	controllerType=0 controllerNumber=1 scan=6457	21.7227
07130:3	9	R.EAGN[+2336.851]HTSGAGLVQINK.S	HexNAc(6)Hex(6)Fuc(1)NeuAc(0)	N[+2337]	1311.56	3	3932.67	3932.66	0	0.7	80	Specific	526.68	293.69	52.33	7.35	32	>sp|P20645|MPRD_HUMAN Cation-dependent mannose-6-phosphate receptor OS=Homo sapiens GN=M6PR PE=1 SV=1	10570	cacoP7gpep1.7285.7285.3	controllerType=0 controllerNumber=1 scan=7285	23.781
07186:3	9	R.EAGN[+2627.947]HTSGAGLVQINK.S	HexNAc(6)Hex(6)Fuc(1)NeuAc(1)	N[+2628]	1408.94	3	4224.8	4223.76	1	7.8	80	Specific	537.28	451.13	14.3	9.05	32	>sp|P20645|MPRD_HUMAN Cation-dependent mannose-6-phosphate receptor OS=Homo sapiens GN=M6PR PE=1 SV=1	10570	cacoP7gpep1.7334.7334.3	controllerType=0 controllerNumber=1 scan=7334	23.9355
13436:3	9	R.EAGN[+3065.100]HTSGAGLVQINK.S	HexNAc(6)Hex(6)Fuc(2)NeuAc(2)	N[+3065]	1553.97	3	4659.89	4660.91	-1	-3.4	80	Specific	563.91	357.75	45.19	7.44	32	>sp|P20645|MPRD_HUMAN Cation-dependent mannose-6-phosphate receptor OS=Homo sapiens GN=M6PR PE=1 SV=1	10570	cacoP7gpep1.12250.12250.3	controllerType=0 controllerNumber=1 scan=12250	40.5824
01134:2	10	R.YHN[+1702.581]QTLR.Y	HexNAc(2)Hex(8)Fuc(0)NeuAc(0)	N[+1703]	1317.54	2	2634.07	2634.06	0	4.5	398	Specific	411.34	205.77	205.77	4.56	35	>sp|P11717|MPRI_HUMAN Cation-independent mannose-6-phosphate receptor OS=Homo sapiens GN=IGF2R PE=1 SV=3	10573	cacoP7gpep1.2724.2724.2	controllerType=0 controllerNumber=1 scan=2724	11.0874
01141:2	10	R.YHN[+1702.581]QTLR.Y	HexNAc(2)Hex(8)Fuc(0)NeuAc(0)	N[+1703]	1317.54	2	2634.07	2634.06	0	4.7	398	Specific	435.62	200.57	200.57	4.7	35	>sp|P11717|MPRI_HUMAN Cation-independent mannose-6-phosphate receptor OS=Homo sapiens GN=IGF2R PE=1 SV=3	10573	cacoP7gpep1.2729.2729.2	controllerType=0 controllerNumber=1 scan=2729	11.0967
21790:3	10	R.MSVINFEC[+57.021]N[+2553.910]K.T	HexNAc(5)Hex(5)Fuc(1)NeuAc(2)	C[+57], N[+2554]	1265.83	3	3795.49	3795.47	0	3.3	427	Specific	207.21	81.39	81.39	2.79	35	>sp|P11717|MPRI_HUMAN Cation-independent mannose-6-phosphate receptor OS=Homo sapiens GN=IGF2R PE=1 SV=3	10573	cacoP7gpep1.19350.19350.3	controllerType=0 controllerNumber=1 scan=19350	74.4202
13748:3	10	R.MSVINFEC[+57.021]N[+1864.634]K.T	HexNAc(2)Hex(9)Fuc(0)NeuAc(0)	C[+57], N[+1865]	1036.08	3	3106.22	3106.2	0	6.1	427	Specific	214.3	89.85	89.85	2.77	35	>sp|P11717|MPRI_HUMAN Cation-independent mannose-6-phosphate receptor OS=Homo sapiens GN=IGF2R PE=1 SV=3	10573	cacoP7gpep1.12485.12485.3	controllerType=0 controllerNumber=1 scan=12485	41.6892
19150:3	10	K.TN[+1378.476]ITLVC[+57.021]KPGDLESAPVLR.T	HexNAc(2)Hex(6)Fuc(0)NeuAc(0)	C[+57], N[+1378]	1154.54	3	3461.61	3461.6	0	5.1	580	Specific	397.39	332.01	332.01	7.11	35	>sp|P11717|MPRI_HUMAN Cation-independent mannose-6-phosphate receptor OS=Homo sapiens GN=IGF2R PE=1 SV=3	10573	cacoP7gpep1.16694.16694.3	controllerType=0 controllerNumber=1 scan=16694	62.6428
19015:3	10	K.TN[+1540.529]ITLVC[+57.021]KPGDLESAPVLR.T	HexNAc(2)Hex(7)Fuc(0)NeuAc(0)	C[+57], N[+1541]	1208.56	3	3623.67	3623.65	0	5.3	580	Specific	674.24	541.57	541.57	12.61	35	>sp|P11717|MPRI_HUMAN Cation-independent mannose-6-phosphate receptor OS=Homo sapiens GN=IGF2R PE=1 SV=3	10573	cacoP7gpep1.16577.16577.3	controllerType=0 controllerNumber=1 scan=16577	62.0844
18952:3	10	K.TN[+1702.581]ITLVC[+57.021]KPGDLESAPVLR.T	HexNAc(2)Hex(8)Fuc(0)NeuAc(0)	C[+57], N[+1703]	1262.58	3	3785.71	3785.7	0	2	580	Specific	861.96	748.55	748.55	16.67	35	>sp|P11717|MPRI_HUMAN Cation-independent mannose-6-phosphate receptor OS=Homo sapiens GN=IGF2R PE=1 SV=3	10573	cacoP7gpep1.16519.16519.3	controllerType=0 controllerNumber=1 scan=16519	61.804
23272:4	10	R.DAGVGFPEYQEEDN[+2262.814]STYNFR.W	HexNAc(5)Hex(5)Fuc(1)NeuAc(1)	N[+2263]	1150.96	4	4600.81	4600.8	0	2.2	734	Specific	204.23	109.53	28.03	3.66	35	>sp|P11717|MPRI_HUMAN Cation-independent mannose-6-phosphate receptor OS=Homo sapiens GN=IGF2R PE=1 SV=3	10573	cacoP7gpep1.22742.22742.4	controllerType=0 controllerNumber=1 scan=22742	88.7401
21922:3	10	R.DAGVGFPEYQEEDN[+1971.719]STYNFR.W	HexNAc(5)Hex(5)Fuc(1)NeuAc(0)	N[+1972]	1437.58	3	4310.73	4309.71	1	3.2	734	Specific	217.5	116.36	116.36	4.39	35	>sp|P11717|MPRI_HUMAN Cation-independent mannose-6-phosphate receptor OS=Homo sapiens GN=IGF2R PE=1 SV=3	10573	cacoP7gpep1.19526.19526.3	controllerType=0 controllerNumber=1 scan=19526	75.1602
21898:3	10	R.DAGVGFPEYQEEDN[+1971.719]STYNFR.W	HexNAc(5)Hex(5)Fuc(1)NeuAc(0)	N[+1972]	1437.25	3	4309.73	4309.71	0	6.1	734	Specific	356.35	233.5	233.5	6.67	35	>sp|P11717|MPRI_HUMAN Cation-independent mannose-6-phosphate receptor OS=Homo sapiens GN=IGF2R PE=1 SV=3	10573	cacoP7gpep1.19488.19488.3	controllerType=0 controllerNumber=1 scan=19488	75.0014
03246:3	10	K.MN[+2026.687]FTGGDTC[+57.021]HK.V	HexNAc(2)Hex(10)Fuc(0)NeuAc(0)	C[+57], N[+2027]	1098.74	3	3294.21	3294.21	0	1.2	1311	Specific	364.76	364.76	364.76	6.7	35	>sp|P11717|MPRI_HUMAN Cation-independent mannose-6-phosphate receptor OS=Homo sapiens GN=IGF2R PE=1 SV=3	10573	cacoP7gpep1.4446.4446.3	controllerType=0 controllerNumber=1 scan=4446	16.2991
03222:3	10	K.MN[+1702.581]FTGGDTC[+57.021]HK.V	HexNAc(2)Hex(8)Fuc(0)NeuAc(0)	C[+57], N[+1703]	990.708	3	2970.11	2970.1	0	2.8	1311	Specific	434.46	300.46	300.46	6.61	35	>sp|P11717|MPRI_HUMAN Cation-independent mannose-6-phosphate receptor OS=Homo sapiens GN=IGF2R PE=1 SV=3	10573	cacoP7gpep1.4427.4427.3	controllerType=0 controllerNumber=1 scan=4427	16.2403
03209:3	10	K.MN[+1864.634]FTGGDTC[+57.021]HK.V	HexNAc(2)Hex(9)Fuc(0)NeuAc(0)	C[+57], N[+1865]	1044.72	3	3132.16	3132.15	0	1.3	1311	Specific	462.98	415.17	415.17	8.27	35	>sp|P11717|MPRI_HUMAN Cation-independent mannose-6-phosphate receptor OS=Homo sapiens GN=IGF2R PE=1 SV=3	10573	cacoP7gpep1.4416.4416.3	controllerType=0 controllerNumber=1 scan=4416	16.2134
18518:3	10	R.N[+1873.671]GSSIVDLSPLIHR.T	HexNAc(3)Hex(6)Fuc(2)NeuAc(0)	N[+1874]	1127.84	3	3381.5	3381.49	0	2.6	1656	Specific	145.54	74.23	74.23	2.02	35	>sp|P11717|MPRI_HUMAN Cation-independent mannose-6-phosphate receptor OS=Homo sapiens GN=IGF2R PE=1 SV=3	10573	cacoP7gpep1.16171.16171.3	controllerType=0 controllerNumber=1 scan=16171	60.0565
21794:3	10	R.N[+2059.735]GSSIVDLSPLIHR.T	HexNAc(4)Hex(5)Fuc(1)NeuAc(1)	N[+2060]	1189.87	3	3567.59	3567.56	0	9.6	1656	Specific	161.12	84.91	84.91	2.45	35	>sp|P11717|MPRI_HUMAN Cation-independent mannose-6-phosphate receptor OS=Homo sapiens GN=IGF2R PE=1 SV=3	10573	cacoP7gpep1.19355.19355.4	controllerType=0 controllerNumber=1 scan=19355	74.4439
18574:3	10	R.N[+1971.719]GSSIVDLSPLIHR.T	HexNAc(5)Hex(5)Fuc(1)NeuAc(0)	N[+1972]	1160.52	3	3479.54	3479.54	0	-1.7	1656	Specific	204.26	143.9	143.9	3.02	35	>sp|P11717|MPRI_HUMAN Cation-independent mannose-6-phosphate receptor OS=Homo sapiens GN=IGF2R PE=1 SV=3	10573	cacoP7gpep1.16213.16213.3	controllerType=0 controllerNumber=1 scan=16213	60.2691
21796:3	10	R.N[+2059.735]GSSIVDLSPLIHR.T	HexNAc(4)Hex(5)Fuc(1)NeuAc(1)	N[+2060]	1189.87	3	3567.59	3567.56	0	8.9	1656	Specific	209.41	161.97	161.97	3.17	35	>sp|P11717|MPRI_HUMAN Cation-independent mannose-6-phosphate receptor OS=Homo sapiens GN=IGF2R PE=1 SV=3	10573	cacoP7gpep1.19357.19357.3	controllerType=0 controllerNumber=1 scan=19357	74.4509
21862:3	10	R.N[+1872.651]GSSIVDLSPLIHR.T	HexNAc(3)Hex(6)Fuc(0)NeuAc(1)	N[+1873]	1127.5	3	3380.47	3380.47	0	0	1656	Specific	217.37	96.64	96.64	2.87	35	>sp|P11717|MPRI_HUMAN Cation-independent mannose-6-phosphate receptor OS=Homo sapiens GN=IGF2R PE=1 SV=3	10573	cacoP7gpep1.19442.19442.3	controllerType=0 controllerNumber=1 scan=19442	74.8133
18669:3	10	R.N[+1581.555]GSSIVDLSPLIHR.T	HexNAc(3)Hex(6)Fuc(0)NeuAc(0)	N[+1582]	1030.47	3	3089.38	3089.38	0	1.7	1656	Specific	233.84	53.76	53.76	4.55	35	>sp|P11717|MPRI_HUMAN Cation-independent mannose-6-phosphate receptor OS=Homo sapiens GN=IGF2R PE=1 SV=3	10573	cacoP7gpep1.16288.16288.3	controllerType=0 controllerNumber=1 scan=16288	60.6561
18655:3	10	R.N[+1784.634]GSSIVDLSPLIHR.T	HexNAc(4)Hex(6)Fuc(0)NeuAc(0)	N[+1785]	1098.16	3	3292.46	3292.46	0	0.7	1656	Specific	255.04	88.74	88.74	5.13	35	>sp|P11717|MPRI_HUMAN Cation-independent mannose-6-phosphate receptor OS=Homo sapiens GN=IGF2R PE=1 SV=3	10573	cacoP7gpep1.16276.16276.3	controllerType=0 controllerNumber=1 scan=16276	60.5832
18541:3	10	R.N[+2117.777]GSSIVDLSPLIHR.T	HexNAc(5)Hex(5)Fuc(2)NeuAc(0)	N[+2118]	1209.21	3	3625.61	3625.6	0	2	1656	Specific	255.36	95.67	95.67	4.42	35	>sp|P11717|MPRI_HUMAN Cation-independent mannose-6-phosphate receptor OS=Homo sapiens GN=IGF2R PE=1 SV=3	10573	cacoP7gpep1.16187.16187.3	controllerType=0 controllerNumber=1 scan=16187	60.1357
21853:3	10	R.N[+2262.814]GSSIVDLSPLIHR.T	HexNAc(5)Hex(5)Fuc(1)NeuAc(1)	N[+2263]	1257.55	3	3770.65	3770.64	0	3.3	1656	Specific	260.01	143.68	143.68	5.64	35	>sp|P11717|MPRI_HUMAN Cation-independent mannose-6-phosphate receptor OS=Homo sapiens GN=IGF2R PE=1 SV=3	10573	cacoP7gpep1.19429.19429.3	controllerType=0 controllerNumber=1 scan=19429	74.7571
18640:3	10	R.N[+1955.724]GSSIVDLSPLIHR.T	HexNAc(5)Hex(4)Fuc(2)NeuAc(0)	N[+1956]	1155.19	3	3463.56	3463.55	0	2.5	1656	Specific	261.43	148.44	148.44	5.75	35	>sp|P11717|MPRI_HUMAN Cation-independent mannose-6-phosphate receptor OS=Homo sapiens GN=IGF2R PE=1 SV=3	10573	cacoP7gpep1.16264.16264.3	controllerType=0 controllerNumber=1 scan=16264	60.5217
18558:3	10	R.N[+1727.613]GSSIVDLSPLIHR.T	HexNAc(3)Hex(6)Fuc(1)NeuAc(0)	N[+1728]	1079.15	3	3235.44	3235.44	0	1.1	1656	Specific	264.02	111.4	111.4	5.34	35	>sp|P11717|MPRI_HUMAN Cation-independent mannose-6-phosphate receptor OS=Homo sapiens GN=IGF2R PE=1 SV=3	10573	cacoP7gpep1.16199.16199.3	controllerType=0 controllerNumber=1 scan=16199	60.1969
21801:3	10	R.N[+1872.651]GSSIVDLSPLIHR.T	HexNAc(3)Hex(6)Fuc(0)NeuAc(1)	N[+1873]	1127.5	3	3380.49	3380.47	0	5	1656	Specific	264.55	169.08	169.08	5.84	35	>sp|P11717|MPRI_HUMAN Cation-independent mannose-6-phosphate receptor OS=Homo sapiens GN=IGF2R PE=1 SV=3	10573	cacoP7gpep1.19364.19364.3	controllerType=0 controllerNumber=1 scan=19364	74.477
18806:3	10	R.N[+1809.666]GSSIVDLSPLIHR.T	HexNAc(5)Hex(4)Fuc(1)NeuAc(0)	N[+1810]	1106.51	3	3317.5	3317.49	0	3.6	1656	Specific	274.84	138.48	138.48	5.59	35	>sp|P11717|MPRI_HUMAN Cation-independent mannose-6-phosphate receptor OS=Homo sapiens GN=IGF2R PE=1 SV=3	10573	cacoP7gpep1.16397.16397.3	controllerType=0 controllerNumber=1 scan=16397	61.2053
18684:3	10	R.N[+1930.692]GSSIVDLSPLIHR.T	HexNAc(4)Hex(6)Fuc(1)NeuAc(0)	N[+1931]	1146.85	3	3438.53	3438.51	0	4.6	1656	Specific	279.46	174.26	174.26	5.84	35	>sp|P11717|MPRI_HUMAN Cation-independent mannose-6-phosphate receptor OS=Homo sapiens GN=IGF2R PE=1 SV=3	10573	cacoP7gpep1.16301.16301.3	controllerType=0 controllerNumber=1 scan=16301	60.7194
18525:3	10	R.N[+2263.835]GSSIVDLSPLIHR.T	HexNAc(5)Hex(5)Fuc(3)NeuAc(0)	N[+2264]	1257.9	3	3771.68	3771.66	0	5.1	1656	Specific	290.13	233.67	233.67	5.99	35	>sp|P11717|MPRI_HUMAN Cation-independent mannose-6-phosphate receptor OS=Homo sapiens GN=IGF2R PE=1 SV=3	10573	cacoP7gpep1.16176.16176.3	controllerType=0 controllerNumber=1 scan=16176	60.0796
18734:3	10	R.N[+1378.476]GSSIVDLSPLIHR.T	HexNAc(2)Hex(6)Fuc(0)NeuAc(0)	N[+1378]	962.773	3	2886.3	2886.3	0	2.1	1656	Specific	302.16	105.18	105.18	5.56	35	>sp|P11717|MPRI_HUMAN Cation-independent mannose-6-phosphate receptor OS=Homo sapiens GN=IGF2R PE=1 SV=3	10573	cacoP7gpep1.16340.16340.3	controllerType=0 controllerNumber=1 scan=16340	60.917
18415:3	10	R.N[+1864.634]GSSIVDLSPLIHR.T	HexNAc(2)Hex(9)Fuc(0)NeuAc(0)	N[+1865]	1124.83	3	3372.47	3372.46	0	4.3	1656	Specific	382.45	111.15	111.15	5.76	35	>sp|P11717|MPRI_HUMAN Cation-independent mannose-6-phosphate receptor OS=Homo sapiens GN=IGF2R PE=1 SV=3	10573	cacoP7gpep1.16093.16093.3	controllerType=0 controllerNumber=1 scan=16093	59.6761
18690:3	10	R.N[+1971.719]GSSIVDLSPLIHR.T	HexNAc(5)Hex(5)Fuc(1)NeuAc(0)	N[+1972]	1160.52	3	3479.55	3479.54	0	2	1656	Specific	400.95	195.25	195.25	6.25	35	>sp|P11717|MPRI_HUMAN Cation-independent mannose-6-phosphate receptor OS=Homo sapiens GN=IGF2R PE=1 SV=3	10573	cacoP7gpep1.16307.16307.3	controllerType=0 controllerNumber=1 scan=16307	60.7478
18627:3	10	R.N[+1540.529]GSSIVDLSPLIHR.T	HexNAc(2)Hex(7)Fuc(0)NeuAc(0)	N[+1541]	1016.79	3	3048.36	3048.35	0	1.7	1656	Specific	423.9	199.77	199.77	6.39	35	>sp|P11717|MPRI_HUMAN Cation-independent mannose-6-phosphate receptor OS=Homo sapiens GN=IGF2R PE=1 SV=3	10573	cacoP7gpep1.16255.16255.3	controllerType=0 controllerNumber=1 scan=16255	60.4769
18498:3	10	R.N[+1702.581]GSSIVDLSPLIHR.T	HexNAc(2)Hex(8)Fuc(0)NeuAc(0)	N[+1703]	1070.81	3	3210.41	3210.4	0	1.4	1656	Specific	497.5	204.31	204.31	6.63	35	>sp|P11717|MPRI_HUMAN Cation-independent mannose-6-phosphate receptor OS=Homo sapiens GN=IGF2R PE=1 SV=3	10573	cacoP7gpep1.16158.16158.3	controllerType=0 controllerNumber=1 scan=16158	59.9895
20131:3	11	R.AGPN[+1897.682]GTLFVADAYK.G	HexNAc(4)Hex(4)Fuc(1)NeuAc(1)	N[+1898]	1107.81	3	3321.41	3321.4	0	3.4	157	Specific	191.69	96.89	96.89	2.85	14	>sp|Q9HDC9|APMAP_HUMAN Adipocyte plasma membrane-associated protein OS=Homo sapiens GN=APMAP PE=1 SV=2	979	cacoP7gpep1.17577.17577.3	controllerType=0 controllerNumber=1 scan=17577	66.7563
11080:3	11	R.AGPN[+1540.529]GTLFVADAYK.G	HexNAc(2)Hex(7)Fuc(0)NeuAc(0)	N[+1541]	988.756	3	2964.25	2964.25	0	1.5	157	Specific	223.99	152.89	152.89	4.46	14	>sp|Q9HDC9|APMAP_HUMAN Adipocyte plasma membrane-associated protein OS=Homo sapiens GN=APMAP PE=1 SV=2	979	cacoP7gpep1.10418.10418.3	controllerType=0 controllerNumber=1 scan=10418	33.2638
16429:3	11	R.AGPN[+1702.581]GTLFVADAYK.G	HexNAc(2)Hex(8)Fuc(0)NeuAc(0)	N[+1703]	1042.77	3	3126.31	3126.3	0	1.5	157	Specific	238.82	138.41	138.41	5.29	14	>sp|Q9HDC9|APMAP_HUMAN Adipocyte plasma membrane-associated protein OS=Homo sapiens GN=APMAP PE=1 SV=2	979	cacoP7gpep1.14571.14571.3	controllerType=0 controllerNumber=1 scan=14571	52.0717
16209:3	11	R.AGPN[+2026.687]GTLFVADAYK.G	HexNAc(2)Hex(10)Fuc(0)NeuAc(0)	N[+2027]	1150.81	3	3450.41	3450.41	0	0.4	157	Specific	239.58	159.3	159.3	5.26	14	>sp|Q9HDC9|APMAP_HUMAN Adipocyte plasma membrane-associated protein OS=Homo sapiens GN=APMAP PE=1 SV=2	979	cacoP7gpep1.14398.14398.3	controllerType=0 controllerNumber=1 scan=14398	51.2083
16333:2	11	R.AGPN[+1864.634]GTLFVADAYK.G	HexNAc(2)Hex(9)Fuc(0)NeuAc(0)	N[+1865]	1644.69	2	3288.37	3288.36	0	3.7	157	Specific	343.4	207.94	207.94	6.19	14	>sp|Q9HDC9|APMAP_HUMAN Adipocyte plasma membrane-associated protein OS=Homo sapiens GN=APMAP PE=1 SV=2	979	cacoP7gpep1.14495.14495.2	controllerType=0 controllerNumber=1 scan=14495	51.6922
10944:3	11	R.AGPN[+1702.581]GTLFVADAYK.G	HexNAc(2)Hex(8)Fuc(0)NeuAc(0)	N[+1703]	1042.77	3	3126.31	3126.3	0	1.9	157	Specific	368.91	207.99	207.99	6	14	>sp|Q9HDC9|APMAP_HUMAN Adipocyte plasma membrane-associated protein OS=Homo sapiens GN=APMAP PE=1 SV=2	979	cacoP7gpep1.10307.10307.3	controllerType=0 controllerNumber=1 scan=10307	32.896
16461:3	11	R.AGPN[+1549.565]GTLFVADAYK.G	HexNAc(3)Hex(4)Fuc(2)NeuAc(0)	N[+1550]	991.769	3	2973.29	2973.29	0	1.4	157	Specific	373.68	160.49	160.49	5.92	14	>sp|Q9HDC9|APMAP_HUMAN Adipocyte plasma membrane-associated protein OS=Homo sapiens GN=APMAP PE=1 SV=2	979	cacoP7gpep1.14592.14592.3	controllerType=0 controllerNumber=1 scan=14592	52.1778
16629:3	11	R.AGPN[+1216.423]GTLFVADAYK.G	HexNAc(2)Hex(5)Fuc(0)NeuAc(0)	N[+1216]	880.721	3	2640.15	2640.14	0	2	157	Specific	373.74	189.99	189.99	5.97	14	>sp|Q9HDC9|APMAP_HUMAN Adipocyte plasma membrane-associated protein OS=Homo sapiens GN=APMAP PE=1 SV=2	979	cacoP7gpep1.14714.14714.3	controllerType=0 controllerNumber=1 scan=14714	52.7833
16685:3	11	R.AGPN[+1054.370]GTLFVADAYK.G	HexNAc(2)Hex(4)Fuc(0)NeuAc(0)	N[+1054]	826.706	3	2478.1	2478.09	0	4.3	157	Specific	417.79	262.07	262.07	6.11	14	>sp|Q9HDC9|APMAP_HUMAN Adipocyte plasma membrane-associated protein OS=Homo sapiens GN=APMAP PE=1 SV=2	979	cacoP7gpep1.14755.14755.3	controllerType=0 controllerNumber=1 scan=14755	52.9907
16224:3	11	R.AGPN[+1864.634]GTLFVADAYK.G	HexNAc(2)Hex(9)Fuc(0)NeuAc(0)	N[+1865]	1096.79	3	3288.37	3288.36	0	3.2	157	Specific	427.82	229.35	229.35	6.2	14	>sp|Q9HDC9|APMAP_HUMAN Adipocyte plasma membrane-associated protein OS=Homo sapiens GN=APMAP PE=1 SV=2	979	cacoP7gpep1.14410.14410.3	controllerType=0 controllerNumber=1 scan=14410	51.2652
16472:3	11	R.AGPN[+1540.529]GTLFVADAYK.G	HexNAc(2)Hex(7)Fuc(0)NeuAc(0)	N[+1541]	988.758	3	2964.26	2964.25	0	2.8	157	Specific	472.07	439.43	439.43	8.24	14	>sp|Q9HDC9|APMAP_HUMAN Adipocyte plasma membrane-associated protein OS=Homo sapiens GN=APMAP PE=1 SV=2	979	cacoP7gpep1.14601.14601.3	controllerType=0 controllerNumber=1 scan=14601	52.2224
16462:3	11	R.AGPN[+1378.476]GTLFVADAYK.G	HexNAc(2)Hex(6)Fuc(0)NeuAc(0)	N[+1378]	934.74	3	2802.2	2802.2	0	2.5	157	Specific	499.4	287.74	287.74	6.58	14	>sp|Q9HDC9|APMAP_HUMAN Adipocyte plasma membrane-associated protein OS=Homo sapiens GN=APMAP PE=1 SV=2	979	cacoP7gpep1.14593.14593.3	controllerType=0 controllerNumber=1 scan=14593	52.1833
16794:2	11	R.AGPN[+1444.534]GTLFVADAYK.G	HexNAc(4)Hex(3)Fuc(1)NeuAc(0)	N[+1445]	1434.64	2	2868.27	2868.26	0	5	157	Specific	513.34	326.44	326.44	6.97	14	>sp|Q9HDC9|APMAP_HUMAN Adipocyte plasma membrane-associated protein OS=Homo sapiens GN=APMAP PE=1 SV=2	979	cacoP7gpep1.14843.14843.2	controllerType=0 controllerNumber=1 scan=14843	53.4348
16809:3	11	R.AGPN[+1647.613]GTLFVADAYK.G	HexNAc(5)Hex(3)Fuc(1)NeuAc(0)	N[+1648]	1024.45	3	3071.34	3071.33	0	2.8	157	Specific	528.9	297.68	297.68	6.73	14	>sp|Q9HDC9|APMAP_HUMAN Adipocyte plasma membrane-associated protein OS=Homo sapiens GN=APMAP PE=1 SV=2	979	cacoP7gpep1.14855.14855.3	controllerType=0 controllerNumber=1 scan=14855	53.4916
16868:2	11	R.AGPN[+1241.454]GTLFVADAYK.G	HexNAc(3)Hex(3)Fuc(1)NeuAc(0)	N[+1241]	1333.1	2	2665.19	2665.18	0	6.2	157	Specific	569.61	375.02	375.02	7.37	14	>sp|Q9HDC9|APMAP_HUMAN Adipocyte plasma membrane-associated protein OS=Homo sapiens GN=APMAP PE=1 SV=2	979	cacoP7gpep1.14896.14896.2	controllerType=0 controllerNumber=1 scan=14896	53.6953
16856:2	11	R.AGPN[+1241.454]GTLFVADAYK.G	HexNAc(3)Hex(3)Fuc(1)NeuAc(0)	N[+1241]	1333.1	2	2665.19	2665.18	0	7	157	Specific	578.2	385.51	385.51	8.67	14	>sp|Q9HDC9|APMAP_HUMAN Adipocyte plasma membrane-associated protein OS=Homo sapiens GN=APMAP PE=1 SV=2	979	cacoP7gpep1.14889.14889.2	controllerType=0 controllerNumber=1 scan=14889	53.6615
16260:3	11	R.AGPN[+1702.581]GTLFVADAYK.G	HexNAc(2)Hex(8)Fuc(0)NeuAc(0)	N[+1703]	1042.78	3	3126.31	3126.3	0	3	157	Specific	596.4	428.78	428.78	9.99	14	>sp|Q9HDC9|APMAP_HUMAN Adipocyte plasma membrane-associated protein OS=Homo sapiens GN=APMAP PE=1 SV=2	979	cacoP7gpep1.14440.14440.3	controllerType=0 controllerNumber=1 scan=14440	51.4155
16262:2	11	R.AGPN[+1864.634]GTLFVADAYK.G	HexNAc(2)Hex(9)Fuc(0)NeuAc(0)	N[+1865]	1644.69	2	3288.37	3288.36	0	5.2	157	Specific	611.62	432.58	432.58	11.14	14	>sp|Q9HDC9|APMAP_HUMAN Adipocyte plasma membrane-associated protein OS=Homo sapiens GN=APMAP PE=1 SV=2	979	cacoP7gpep1.14442.14442.2	controllerType=0 controllerNumber=1 scan=14442	51.4249
16362:2	11	R.AGPN[+1540.529]GTLFVADAYK.G	HexNAc(2)Hex(7)Fuc(0)NeuAc(0)	N[+1541]	1482.63	2	2964.26	2964.25	0	2.7	157	Specific	618.41	434.84	434.84	11.23	14	>sp|Q9HDC9|APMAP_HUMAN Adipocyte plasma membrane-associated protein OS=Homo sapiens GN=APMAP PE=1 SV=2	979	cacoP7gpep1.14519.14519.2	controllerType=0 controllerNumber=1 scan=14519	51.8141
16484:2	11	R.AGPN[+1378.476]GTLFVADAYK.G	HexNAc(2)Hex(6)Fuc(0)NeuAc(0)	N[+1378]	1401.61	2	2802.21	2802.2	0	5	157	Specific	637.7	454.24	454.24	11.14	14	>sp|Q9HDC9|APMAP_HUMAN Adipocyte plasma membrane-associated protein OS=Homo sapiens GN=APMAP PE=1 SV=2	979	cacoP7gpep1.14610.14610.2	controllerType=0 controllerNumber=1 scan=14610	52.2684
16636:2	11	R.AGPN[+1216.423]GTLFVADAYK.G	HexNAc(2)Hex(5)Fuc(0)NeuAc(0)	N[+1216]	1320.58	2	2640.16	2640.14	0	6.1	157	Specific	644.39	477.17	477.17	11.09	14	>sp|Q9HDC9|APMAP_HUMAN Adipocyte plasma membrane-associated protein OS=Homo sapiens GN=APMAP PE=1 SV=2	979	cacoP7gpep1.14719.14719.2	controllerType=0 controllerNumber=1 scan=14719	52.8108
16379:2	11	R.AGPN[+1540.529]GTLFVADAYK.G	HexNAc(2)Hex(7)Fuc(0)NeuAc(0)	N[+1541]	1482.64	2	2964.26	2964.25	0	4.9	157	Specific	659.84	472.27	472.27	12.14	14	>sp|Q9HDC9|APMAP_HUMAN Adipocyte plasma membrane-associated protein OS=Homo sapiens GN=APMAP PE=1 SV=2	979	cacoP7gpep1.14534.14534.2	controllerType=0 controllerNumber=1 scan=14534	51.8872
16277:2	11	R.AGPN[+1702.581]GTLFVADAYK.G	HexNAc(2)Hex(8)Fuc(0)NeuAc(0)	N[+1703]	1563.67	2	3126.33	3126.3	0	7.5	157	Specific	686.05	422.27	422.27	12.01	14	>sp|Q9HDC9|APMAP_HUMAN Adipocyte plasma membrane-associated protein OS=Homo sapiens GN=APMAP PE=1 SV=2	979	cacoP7gpep1.14454.14454.2	controllerType=0 controllerNumber=1 scan=14454	51.4862
16801:2	11	R.AGPN[+1647.613]GTLFVADAYK.G	HexNAc(5)Hex(3)Fuc(1)NeuAc(0)	N[+1648]	1536.18	2	3071.35	3071.33	0	4.2	157	Specific	690.68	474.78	474.78	12.14	14	>sp|Q9HDC9|APMAP_HUMAN Adipocyte plasma membrane-associated protein OS=Homo sapiens GN=APMAP PE=1 SV=2	979	cacoP7gpep1.14849.14849.2	controllerType=0 controllerNumber=1 scan=14849	53.4633
16301:3	11	R.AGPN[+1540.529]GTLFVADAYK.G	HexNAc(2)Hex(7)Fuc(0)NeuAc(0)	N[+1541]	988.758	3	2964.26	2964.25	0	2.6	157	Specific	769.95	645.76	645.76	13.99	14	>sp|Q9HDC9|APMAP_HUMAN Adipocyte plasma membrane-associated protein OS=Homo sapiens GN=APMAP PE=1 SV=2	979	cacoP7gpep1.14474.14474.3	controllerType=0 controllerNumber=1 scan=14474	51.5865
16154:3	11	K.N[+1711.618]MSFVNDLTVTQDGR.K	HexNAc(3)Hex(5)Fuc(2)NeuAc(0)	N[+1712]	1136.82	3	3408.44	3408.41	0	6.3	196	Specific	297.12	257.68	257.68	5.57	14	>sp|Q9HDC9|APMAP_HUMAN Adipocyte plasma membrane-associated protein OS=Homo sapiens GN=APMAP PE=1 SV=2	979	cacoP7gpep1.14359.14359.3	controllerType=0 controllerNumber=1 scan=14359	51.0108
08577:3	12	K.GQTEIQVNC[+57.021]PPAVTEN[+1540.529]K.T	HexNAc(2)Hex(7)Fuc(0)NeuAc(0)	C[+57], N[+1541]	1142.48	3	3425.43	3425.44	0	-2.4	56	Specific	241.46	142.2	142.2	4.37	13	>sp|Q16563|SYPL1_HUMAN Synaptophysin-like protein 1 OS=Homo sapiens GN=SYPL1 PE=1 SV=1	16842	cacoP7gpep1.8425.8425.3	controllerType=0 controllerNumber=1 scan=8425	27.0175
15375:3	12	K.GQTEIQVNC[+57.021]PPAVTEN[+2018.708]K.T	HexNAc(3)Hex(6)Fuc(1)NeuAc(1)	C[+57], N[+2019]	1301.89	3	3903.64	3903.62	0	5.7	56	Specific	423.45	271.21	271.21	6.72	13	>sp|Q16563|SYPL1_HUMAN Synaptophysin-like protein 1 OS=Homo sapiens GN=SYPL1 PE=1 SV=1	16842	cacoP7gpep1.13772.13772.3	controllerType=0 controllerNumber=1 scan=13772	48.082
12839:3	12	K.GQTEIQVNC[+57.021]PPAVTEN[+1581.555]K.T	HexNAc(3)Hex(6)Fuc(0)NeuAc(0)	C[+57], N[+1582]	1156.17	3	3466.49	3466.47	0	6.6	56	Specific	434.77	243.19	243.19	6.45	13	>sp|Q16563|SYPL1_HUMAN Synaptophysin-like protein 1 OS=Homo sapiens GN=SYPL1 PE=1 SV=1	16842	cacoP7gpep1.11791.11791.3	controllerType=0 controllerNumber=1 scan=11791	38.4821
12855:3	12	K.GQTEIQVNC[+57.021]PPAVTEN[+1727.613]K.T	HexNAc(3)Hex(6)Fuc(1)NeuAc(0)	C[+57], N[+1728]	1204.85	3	3612.54	3612.52	0	4.6	56	Specific	498.86	310.67	310.67	7.14	13	>sp|Q16563|SYPL1_HUMAN Synaptophysin-like protein 1 OS=Homo sapiens GN=SYPL1 PE=1 SV=1	16842	cacoP7gpep1.11804.11804.3	controllerType=0 controllerNumber=1 scan=11804	38.5415
12561:3	12	K.GQTEIQVNC[+57.021]PPAVTEN[+2026.687]K.T	HexNAc(2)Hex(10)Fuc(0)NeuAc(0)	C[+57], N[+2027]	1304.55	3	3911.63	3911.6	0	6.8	56	Specific	522.65	327.99	327.99	7.15	13	>sp|Q16563|SYPL1_HUMAN Synaptophysin-like protein 1 OS=Homo sapiens GN=SYPL1 PE=1 SV=1	16842	cacoP7gpep1.11578.11578.3	controllerType=0 controllerNumber=1 scan=11578	37.5726
12538:3	12	K.GQTEIQVNC[+57.021]PPAVTEN[+2026.687]K.T	HexNAc(2)Hex(10)Fuc(0)NeuAc(0)	C[+57], N[+2027]	1304.55	3	3911.63	3911.6	0	8.5	56	Specific	539.52	343.74	343.74	6.98	13	>sp|Q16563|SYPL1_HUMAN Synaptophysin-like protein 1 OS=Homo sapiens GN=SYPL1 PE=1 SV=1	16842	cacoP7gpep1.11558.11558.3	controllerType=0 controllerNumber=1 scan=11558	37.4842
15554:3	12	K.GQTEIQVNC[+57.021]PPAVTEN[+1872.651]K.T	HexNAc(3)Hex(6)Fuc(0)NeuAc(1)	C[+57], N[+1873]	1253.2	3	3757.58	3757.56	0	5	56	Specific	546.25	334.35	334.35	7.46	13	>sp|Q16563|SYPL1_HUMAN Synaptophysin-like protein 1 OS=Homo sapiens GN=SYPL1 PE=1 SV=1	16842	cacoP7gpep1.13902.13902.3	controllerType=0 controllerNumber=1 scan=13902	48.7296
12615:3	12	K.GQTEIQVNC[+57.021]PPAVTEN[+1727.613]K.T	HexNAc(3)Hex(6)Fuc(1)NeuAc(0)	C[+57], N[+1728]	1204.85	3	3612.54	3612.52	0	4.7	56	Specific	592.46	415.15	415.15	10.41	13	>sp|Q16563|SYPL1_HUMAN Synaptophysin-like protein 1 OS=Homo sapiens GN=SYPL1 PE=1 SV=1	16842	cacoP7gpep1.11620.11620.3	controllerType=0 controllerNumber=1 scan=11620	37.7515
12616:3	12	K.GQTEIQVNC[+57.021]PPAVTEN[+1873.671]K.T	HexNAc(3)Hex(6)Fuc(2)NeuAc(0)	C[+57], N[+1874]	1253.54	3	3758.6	3758.58	0	4.6	56	Specific	599.88	437.14	437.14	10.41	13	>sp|Q16563|SYPL1_HUMAN Synaptophysin-like protein 1 OS=Homo sapiens GN=SYPL1 PE=1 SV=1	16842	cacoP7gpep1.11621.11621.3	controllerType=0 controllerNumber=1 scan=11621	37.7563
12837:3	12	K.GQTEIQVNC[+57.021]PPAVTEN[+1540.529]K.T	HexNAc(2)Hex(7)Fuc(0)NeuAc(0)	C[+57], N[+1541]	1142.49	3	3425.45	3425.44	0	3.4	56	Specific	605.47	394.85	394.85	11.39	13	>sp|Q16563|SYPL1_HUMAN Synaptophysin-like protein 1 OS=Homo sapiens GN=SYPL1 PE=1 SV=1	16842	cacoP7gpep1.11790.11790.3	controllerType=0 controllerNumber=1 scan=11790	38.4775
15368:3	12	K.GQTEIQVNC[+57.021]PPAVTEN[+1872.651]K.T	HexNAc(3)Hex(6)Fuc(0)NeuAc(1)	C[+57], N[+1873]	1253.2	3	3757.58	3757.56	0	5.3	56	Specific	627.3	418.4	418.4	11.36	13	>sp|Q16563|SYPL1_HUMAN Synaptophysin-like protein 1 OS=Homo sapiens GN=SYPL1 PE=1 SV=1	16842	cacoP7gpep1.13767.13767.3	controllerType=0 controllerNumber=1 scan=13767	48.0563
12707:2	12	K.GQTEIQVNC[+57.021]PPAVTEN[+1540.529]K.T	HexNAc(2)Hex(7)Fuc(0)NeuAc(0)	C[+57], N[+1541]	1713.23	2	3425.46	3425.44	0	4.4	56	Specific	635.01	423.5	423.5	11.66	13	>sp|Q16563|SYPL1_HUMAN Synaptophysin-like protein 1 OS=Homo sapiens GN=SYPL1 PE=1 SV=1	16842	cacoP7gpep1.11696.11696.2	controllerType=0 controllerNumber=1 scan=11696	38.0626
12591:3	12	K.GQTEIQVNC[+57.021]PPAVTEN[+1540.529]K.T	HexNAc(2)Hex(7)Fuc(0)NeuAc(0)	C[+57], N[+1541]	1142.49	3	3425.46	3425.44	0	5.3	56	Specific	655.17	469.91	469.91	12.36	13	>sp|Q16563|SYPL1_HUMAN Synaptophysin-like protein 1 OS=Homo sapiens GN=SYPL1 PE=1 SV=1	16842	cacoP7gpep1.11601.11601.3	controllerType=0 controllerNumber=1 scan=11601	37.6695
12958:3	12	K.GQTEIQVNC[+57.021]PPAVTEN[+1216.423]K.T	HexNAc(2)Hex(5)Fuc(0)NeuAc(0)	C[+57], N[+1216]	1034.45	3	3101.34	3101.33	0	3	56	Specific	660.74	485.84	485.84	12.5	13	>sp|Q16563|SYPL1_HUMAN Synaptophysin-like protein 1 OS=Homo sapiens GN=SYPL1 PE=1 SV=1	16842	cacoP7gpep1.11881.11881.3	controllerType=0 controllerNumber=1 scan=11881	38.9016
12629:3	12	K.GQTEIQVNC[+57.021]PPAVTEN[+1702.581]K.T	HexNAc(2)Hex(8)Fuc(0)NeuAc(0)	C[+57], N[+1703]	1196.51	3	3587.51	3587.49	0	4.9	56	Specific	691.19	463.56	463.56	12.41	13	>sp|Q16563|SYPL1_HUMAN Synaptophysin-like protein 1 OS=Homo sapiens GN=SYPL1 PE=1 SV=1	16842	cacoP7gpep1.11633.11633.3	controllerType=0 controllerNumber=1 scan=11633	37.8033
12765:3	12	K.GQTEIQVNC[+57.021]PPAVTEN[+1378.476]K.T	HexNAc(2)Hex(6)Fuc(0)NeuAc(0)	C[+57], N[+1378]	1088.47	3	3263.39	3263.39	0	1.7	56	Specific	806.39	601.25	601.25	15.43	13	>sp|Q16563|SYPL1_HUMAN Synaptophysin-like protein 1 OS=Homo sapiens GN=SYPL1 PE=1 SV=1	16842	cacoP7gpep1.11742.11742.3	controllerType=0 controllerNumber=1 scan=11742	38.2693
12626:3	12	K.GQTEIQVNC[+57.021]PPAVTEN[+1540.529]K.T	HexNAc(2)Hex(7)Fuc(0)NeuAc(0)	C[+57], N[+1541]	1142.49	3	3425.45	3425.44	0	3	56	Specific	811.13	601.32	601.32	15.5	13	>sp|Q16563|SYPL1_HUMAN Synaptophysin-like protein 1 OS=Homo sapiens GN=SYPL1 PE=1 SV=1	16842	cacoP7gpep1.11631.11631.3	controllerType=0 controllerNumber=1 scan=11631	37.798
17226:4	13	K.LRKQNNGAFN[+2611.952]ETLFR.N	HexNAc(6)Hex(5)Fuc(2)NeuAc(1)	N[+2612]	1105.99	4	4420.92	4419.91	1	2	718	Specific	138.8	108.58	20.23	2.01	20	>sp|P02786|TFR1_HUMAN Transferrin receptor protein 1 OS=Homo sapiens GN=TFRC PE=1 SV=2	17373	cacoP7gpep1.15164.15164.3	controllerType=0 controllerNumber=1 scan=15164	55.0372
11798:3	13	R.KQNNGAFN[+1378.476]ETLFR.N	HexNAc(2)Hex(6)Fuc(0)NeuAc(0)	N[+1378]	973.089	3	2917.25	2917.25	0	2.3	720	Specific	179.33	82.43	82.43	2.43	20	>sp|P02786|TFR1_HUMAN Transferrin receptor protein 1 OS=Homo sapiens GN=TFRC PE=1 SV=2	17373	cacoP7gpep1.11001.11001.3	controllerType=0 controllerNumber=1 scan=11001	35.2332
11751:3	13	R.KQNNGAFN[+1540.529]ETLFR.N	HexNAc(2)Hex(7)Fuc(0)NeuAc(0)	N[+1541]	1027.1	3	3079.29	3079.3	0	-2.7	720	Specific	266.83	95.18	95.18	4.52	20	>sp|P02786|TFR1_HUMAN Transferrin receptor protein 1 OS=Homo sapiens GN=TFRC PE=1 SV=2	17373	cacoP7gpep1.10970.10970.3	controllerType=0 controllerNumber=1 scan=10970	35.1149
11741:3	13	R.KQNNGAFN[+1378.476]ETLFR.N	HexNAc(2)Hex(6)Fuc(0)NeuAc(0)	N[+1378]	973.089	3	2917.25	2917.25	0	2.4	720	Specific	291.01	122.15	122.15	4.94	20	>sp|P02786|TFR1_HUMAN Transferrin receptor protein 1 OS=Homo sapiens GN=TFRC PE=1 SV=2	17373	cacoP7gpep1.10962.10962.3	controllerType=0 controllerNumber=1 scan=10962	35.0916
11542:2	13	R.KQNNGAFN[+1702.581]ETLFR.N	HexNAc(2)Hex(8)Fuc(0)NeuAc(0)	N[+1703]	1621.19	2	3241.38	3241.35	0	8.6	720	Specific	301.71	122.28	122.28	3.08	20	>sp|P02786|TFR1_HUMAN Transferrin receptor protein 1 OS=Homo sapiens GN=TFRC PE=1 SV=2	17373	cacoP7gpep1.10816.10816.2	controllerType=0 controllerNumber=1 scan=10816	34.5551
11324:3	13	R.KQNNGAFN[+2026.687]ETLFR.N	HexNAc(2)Hex(10)Fuc(0)NeuAc(0)	N[+2027]	1189.16	3	3565.46	3565.46	0	-0.1	720	Specific	492.11	267.72	267.72	6.47	20	>sp|P02786|TFR1_HUMAN Transferrin receptor protein 1 OS=Homo sapiens GN=TFRC PE=1 SV=2	17373	cacoP7gpep1.10651.10651.3	controllerType=0 controllerNumber=1 scan=10651	33.957
11516:3	13	R.KQNNGAFN[+1864.634]ETLFR.N	HexNAc(2)Hex(9)Fuc(0)NeuAc(0)	N[+1865]	1135.14	3	3403.42	3403.41	0	3.4	720	Specific	624.85	386.03	386.03	11.12	20	>sp|P02786|TFR1_HUMAN Transferrin receptor protein 1 OS=Homo sapiens GN=TFRC PE=1 SV=2	17373	cacoP7gpep1.10796.10796.3	controllerType=0 controllerNumber=1 scan=10796	34.4855
11565:3	13	R.KQNNGAFN[+1702.581]ETLFR.N	HexNAc(2)Hex(8)Fuc(0)NeuAc(0)	N[+1703]	1081.13	3	3241.36	3241.35	0	3	720	Specific	676.33	416.55	416.55	12.23	20	>sp|P02786|TFR1_HUMAN Transferrin receptor protein 1 OS=Homo sapiens GN=TFRC PE=1 SV=2	17373	cacoP7gpep1.10834.10834.3	controllerType=0 controllerNumber=1 scan=10834	34.6167
11484:3	13	R.KQNNGAFN[+1540.529]ETLFR.N	HexNAc(2)Hex(7)Fuc(0)NeuAc(0)	N[+1541]	1027.11	3	3079.31	3079.3	0	2.1	720	Specific	697.99	437.87	437.87	12.15	20	>sp|P02786|TFR1_HUMAN Transferrin receptor protein 1 OS=Homo sapiens GN=TFRC PE=1 SV=2	17373	cacoP7gpep1.10772.10772.3	controllerType=0 controllerNumber=1 scan=10772	34.3957
15679:3	13	K.QNNGAFN[+1864.634]ETLFR.N	HexNAc(2)Hex(9)Fuc(0)NeuAc(0)	N[+1865]	1092.44	3	3275.32	3275.31	0	1.7	721	Specific	214.57	105.95	105.95	2.97	20	>sp|P02786|TFR1_HUMAN Transferrin receptor protein 1 OS=Homo sapiens GN=TFRC PE=1 SV=2	17373	cacoP7gpep1.13995.13995.3	controllerType=0 controllerNumber=1 scan=13995	49.1917
15562:3	13	K.QNNGAFN[+2043.740]ETLFR.N	HexNAc(4)Hex(4)Fuc(2)NeuAc(1)	N[+2044]	1152.14	3	3454.41	3454.42	0	-1.1	721	Specific	229.4	46.1	46.1	3.43	20	>sp|P02786|TFR1_HUMAN Transferrin receptor protein 1 OS=Homo sapiens GN=TFRC PE=1 SV=2	17373	cacoP7gpep1.13907.13907.3	controllerType=0 controllerNumber=1 scan=13907	48.7567
09929:3	13	K.QNNGAFN[+1702.581]ETLFR.N	HexNAc(2)Hex(8)Fuc(0)NeuAc(0)	N[+1703]	1038.43	3	3113.27	3113.26	0	3.6	721	Specific	246.47	50.77	50.77	3.07	20	>sp|P02786|TFR1_HUMAN Transferrin receptor protein 1 OS=Homo sapiens GN=TFRC PE=1 SV=2	17373	cacoP7gpep1.9465.9465.3	controllerType=0 controllerNumber=1 scan=9465	30.0724
15553:3	13	K.QNNGAFN[+2026.687]ETLFR.N	HexNAc(2)Hex(10)Fuc(0)NeuAc(0)	N[+2027]	1146.47	3	3437.4	3437.36	0	9.9	721	Specific	283.91	107.96	61.35	4.58	20	>sp|P02786|TFR1_HUMAN Transferrin receptor protein 1 OS=Homo sapiens GN=TFRC PE=1 SV=2	17373	cacoP7gpep1.13901.13901.3	controllerType=0 controllerNumber=1 scan=13901	48.7256
15539:3	13	K.QNNGAFN[+1864.634]ETLFR.N	HexNAc(2)Hex(9)Fuc(0)NeuAc(0)	N[+1865]	1092.44	3	3275.32	3275.31	0	2	721	Specific	410.53	147.37	147.37	5.77	20	>sp|P02786|TFR1_HUMAN Transferrin receptor protein 1 OS=Homo sapiens GN=TFRC PE=1 SV=2	17373	cacoP7gpep1.13892.13892.3	controllerType=0 controllerNumber=1 scan=13892	48.681
15724:2	13	K.QNNGAFN[+1540.529]ETLFR.N	HexNAc(2)Hex(7)Fuc(0)NeuAc(0)	N[+1541]	1476.11	2	2951.22	2951.2	0	5.8	721	Specific	510.95	304.63	304.63	6.85	20	>sp|P02786|TFR1_HUMAN Transferrin receptor protein 1 OS=Homo sapiens GN=TFRC PE=1 SV=2	17373	cacoP7gpep1.14031.14031.2	controllerType=0 controllerNumber=1 scan=14031	49.3739
15583:2	13	K.QNNGAFN[+1864.634]ETLFR.N	HexNAc(2)Hex(9)Fuc(0)NeuAc(0)	N[+1865]	1638.17	2	3275.32	3275.31	0	4.2	721	Specific	577.06	355.07	355.07	7.4	20	>sp|P02786|TFR1_HUMAN Transferrin receptor protein 1 OS=Homo sapiens GN=TFRC PE=1 SV=2	17373	cacoP7gpep1.13923.13923.2	controllerType=0 controllerNumber=1 scan=13923	48.8358
15622:2	13	K.QNNGAFN[+1702.581]ETLFR.N	HexNAc(2)Hex(8)Fuc(0)NeuAc(0)	N[+1703]	1557.14	2	3113.27	3113.26	0	3.6	721	Specific	582.9	382.56	382.56	10.12	20	>sp|P02786|TFR1_HUMAN Transferrin receptor protein 1 OS=Homo sapiens GN=TFRC PE=1 SV=2	17373	cacoP7gpep1.13954.13954.2	controllerType=0 controllerNumber=1 scan=13954	48.9914
15646:3	13	K.QNNGAFN[+1540.529]ETLFR.N	HexNAc(2)Hex(7)Fuc(0)NeuAc(0)	N[+1541]	984.404	3	2951.2	2951.2	0	-1.9	721	Specific	606.36	339.22	339.22	8.66	20	>sp|P02786|TFR1_HUMAN Transferrin receptor protein 1 OS=Homo sapiens GN=TFRC PE=1 SV=2	17373	cacoP7gpep1.13970.13970.3	controllerType=0 controllerNumber=1 scan=13970	49.0727
15659:3	13	K.QNNGAFN[+1540.529]ETLFR.N	HexNAc(2)Hex(7)Fuc(0)NeuAc(0)	N[+1541]	984.411	3	2951.22	2951.2	0	4.3	721	Specific	625.28	326.27	326.27	9.31	20	>sp|P02786|TFR1_HUMAN Transferrin receptor protein 1 OS=Homo sapiens GN=TFRC PE=1 SV=2	17373	cacoP7gpep1.13979.13979.3	controllerType=0 controllerNumber=1 scan=13979	49.1173
15597:3	13	K.QNNGAFN[+1702.581]ETLFR.N	HexNAc(2)Hex(8)Fuc(0)NeuAc(0)	N[+1703]	1038.43	3	3113.26	3113.26	0	1.5	721	Specific	666.86	395.61	395.61	11.91	20	>sp|P02786|TFR1_HUMAN Transferrin receptor protein 1 OS=Homo sapiens GN=TFRC PE=1 SV=2	17373	cacoP7gpep1.13934.13934.3	controllerType=0 controllerNumber=1 scan=13934	48.8916
21066:3	13	K.Q[-17.027]NNGAFN[+1540.529]ETLFR.N	HexNAc(2)Hex(7)Fuc(0)NeuAc(0)	N[+1541], Q[-17]	978.728	3	2934.17	2934.18	0	-3.4	721	Specific	218.15	128.06	128.06	2.79	20	>sp|P02786|TFR1_HUMAN Transferrin receptor protein 1 OS=Homo sapiens GN=TFRC PE=1 SV=2	17373	cacoP7gpep1.18545.18545.3	controllerType=0 controllerNumber=1 scan=18545	70.9058
21969:2	13	K.Q[-17.027]NNGAFN[+1702.581]ETLFR.N	HexNAc(2)Hex(8)Fuc(0)NeuAc(0)	N[+1703], Q[-17]	1548.61	2	3096.22	3096.23	0	-2.9	721	Specific	247.19	152.11	152.11	5.03	20	>sp|P02786|TFR1_HUMAN Transferrin receptor protein 1 OS=Homo sapiens GN=TFRC PE=1 SV=2	17373	cacoP7gpep1.19590.19590.2	controllerType=0 controllerNumber=1 scan=19590	75.42
21298:3	13	K.Q[-17.027]NNGAFN[+1540.529]ETLFR.N	HexNAc(2)Hex(7)Fuc(0)NeuAc(0)	N[+1541], Q[-17]	978.733	3	2934.19	2934.18	0	2.4	721	Specific	260.47	201.48	201.48	5.76	20	>sp|P02786|TFR1_HUMAN Transferrin receptor protein 1 OS=Homo sapiens GN=TFRC PE=1 SV=2	17373	cacoP7gpep1.18729.18729.4	controllerType=0 controllerNumber=1 scan=18729	71.8007
22443:2	13	K.Q[-17.027]NNGAFN[+1540.529]ETLFR.N	HexNAc(2)Hex(7)Fuc(0)NeuAc(0)	N[+1541], Q[-17]	1467.59	2	2934.16	2934.18	0	-5	721	Specific	273.69	177.41	177.41	4.92	20	>sp|P02786|TFR1_HUMAN Transferrin receptor protein 1 OS=Homo sapiens GN=TFRC PE=1 SV=2	17373	cacoP7gpep1.20375.20375.2	controllerType=0 controllerNumber=1 scan=20375	78.7152
21121:3	13	K.Q[-17.027]NNGAFN[+1378.476]ETLFR.N	HexNAc(2)Hex(6)Fuc(0)NeuAc(0)	N[+1378], Q[-17]	924.72	3	2772.14	2772.13	0	7.1	721	Specific	327.4	225.11	225.11	5.72	20	>sp|P02786|TFR1_HUMAN Transferrin receptor protein 1 OS=Homo sapiens GN=TFRC PE=1 SV=2	17373	cacoP7gpep1.18587.18587.4	controllerType=0 controllerNumber=1 scan=18587	71.1122
21225:3	13	K.Q[-17.027]NNGAFN[+1540.529]ETLFR.N	HexNAc(2)Hex(7)Fuc(0)NeuAc(0)	N[+1541], Q[-17]	978.733	3	2934.19	2934.18	0	2.6	721	Specific	337.76	210.82	210.82	6.07	20	>sp|P02786|TFR1_HUMAN Transferrin receptor protein 1 OS=Homo sapiens GN=TFRC PE=1 SV=2	17373	cacoP7gpep1.18672.18672.3	controllerType=0 controllerNumber=1 scan=18672	71.5292
21020:2	13	K.Q[-17.027]NNGAFN[+1864.634]ETLFR.N	HexNAc(2)Hex(9)Fuc(0)NeuAc(0)	N[+1865], Q[-17]	1629.65	2	3258.3	3258.28	0	4	721	Specific	386.51	301.74	301.74	6.52	20	>sp|P02786|TFR1_HUMAN Transferrin receptor protein 1 OS=Homo sapiens GN=TFRC PE=1 SV=2	17373	cacoP7gpep1.18505.18505.2	controllerType=0 controllerNumber=1 scan=18505	70.7125
21027:2	13	K.Q[-17.027]NNGAFN[+1864.634]ETLFR.N	HexNAc(2)Hex(9)Fuc(0)NeuAc(0)	N[+1865], Q[-17]	1629.65	2	3258.28	3258.28	0	0.4	721	Specific	411.33	316.8	316.8	6.46	20	>sp|P02786|TFR1_HUMAN Transferrin receptor protein 1 OS=Homo sapiens GN=TFRC PE=1 SV=2	17373	cacoP7gpep1.18514.18514.2	controllerType=0 controllerNumber=1 scan=18514	70.7524
21049:3	13	K.Q[-17.027]NNGAFN[+1864.634]ETLFR.N	HexNAc(2)Hex(9)Fuc(0)NeuAc(0)	N[+1865], Q[-17]	1086.77	3	3258.3	3258.28	0	3.9	721	Specific	415	342.06	342.06	6.44	20	>sp|P02786|TFR1_HUMAN Transferrin receptor protein 1 OS=Homo sapiens GN=TFRC PE=1 SV=2	17373	cacoP7gpep1.18532.18532.3	controllerType=0 controllerNumber=1 scan=18532	70.842
21234:2	13	K.Q[-17.027]NNGAFN[+1702.581]ETLFR.N	HexNAc(2)Hex(8)Fuc(0)NeuAc(0)	N[+1703], Q[-17]	1548.62	2	3096.24	3096.23	0	3.7	721	Specific	416.28	308.96	308.96	6.5	20	>sp|P02786|TFR1_HUMAN Transferrin receptor protein 1 OS=Homo sapiens GN=TFRC PE=1 SV=2	17373	cacoP7gpep1.18680.18680.2	controllerType=0 controllerNumber=1 scan=18680	71.5692
21024:3	13	K.Q[-17.027]NNGAFN[+1864.634]ETLFR.N	HexNAc(2)Hex(9)Fuc(0)NeuAc(0)	N[+1865], Q[-17]	1086.77	3	3258.29	3258.28	0	0.9	721	Specific	431.11	352.73	352.73	6.54	20	>sp|P02786|TFR1_HUMAN Transferrin receptor protein 1 OS=Homo sapiens GN=TFRC PE=1 SV=2	17373	cacoP7gpep1.18512.18512.3	controllerType=0 controllerNumber=1 scan=18512	70.7413
21140:2	13	K.Q[-17.027]NNGAFN[+1216.423]ETLFR.N	HexNAc(2)Hex(5)Fuc(0)NeuAc(0)	N[+1216], Q[-17]	1305.55	2	2610.09	2610.07	0	7.9	721	Specific	468.33	352.17	352.17	6.81	20	>sp|P02786|TFR1_HUMAN Transferrin receptor protein 1 OS=Homo sapiens GN=TFRC PE=1 SV=2	17373	cacoP7gpep1.18601.18601.2	controllerType=0 controllerNumber=1 scan=18601	71.1841
21226:2	13	K.Q[-17.027]NNGAFN[+1540.529]ETLFR.N	HexNAc(2)Hex(7)Fuc(0)NeuAc(0)	N[+1541], Q[-17]	1467.6	2	2934.19	2934.18	0	5.2	721	Specific	473.05	365.43	365.43	7.05	20	>sp|P02786|TFR1_HUMAN Transferrin receptor protein 1 OS=Homo sapiens GN=TFRC PE=1 SV=2	17373	cacoP7gpep1.18673.18673.2	controllerType=0 controllerNumber=1 scan=18673	71.535
21088:3	13	K.Q[-17.027]NNGAFN[+1702.581]ETLFR.N	HexNAc(2)Hex(8)Fuc(0)NeuAc(0)	N[+1703], Q[-17]	1032.75	3	3096.24	3096.23	0	2.5	721	Specific	510.79	438.29	438.29	8.39	20	>sp|P02786|TFR1_HUMAN Transferrin receptor protein 1 OS=Homo sapiens GN=TFRC PE=1 SV=2	17373	cacoP7gpep1.18564.18564.3	controllerType=0 controllerNumber=1 scan=18564	70.9968
21087:2	13	K.Q[-17.027]NNGAFN[+1702.581]ETLFR.N	HexNAc(2)Hex(8)Fuc(0)NeuAc(0)	N[+1703], Q[-17]	1548.62	2	3096.24	3096.23	0	3.7	721	Specific	589.09	381.02	381.02	10.12	20	>sp|P02786|TFR1_HUMAN Transferrin receptor protein 1 OS=Homo sapiens GN=TFRC PE=1 SV=2	17373	cacoP7gpep1.18562.18562.2	controllerType=0 controllerNumber=1 scan=18562	70.9902
11857:3	14	R.LEN[+1864.634]ITTGTYTIHAQK.E	HexNAc(2)Hex(9)Fuc(0)NeuAc(0)	N[+1865]	1185.52	3	3554.53	3554.51	0	4.6	367	Specific	758.11	584.05	584.05	14.14	9	>sp|Q5JPE7|NOMO2_HUMAN Nodal modulator 2 OS=Homo sapiens GN=NOMO2 PE=1 SV=1	11414	cacoP7gpep1.11045.11045.3	controllerType=0 controllerNumber=1 scan=11045	35.4154
12098:3	14	R.LEN[+1378.476]ITTGTYTIHAQK.E	HexNAc(2)Hex(6)Fuc(0)NeuAc(0)	N[+1378]	1023.46	3	3068.37	3068.36	0	3.7	367	Specific	790.37	528.79	528.79	14.12	9	>sp|Q5JPE7|NOMO2_HUMAN Nodal modulator 2 OS=Homo sapiens GN=NOMO2 PE=1 SV=1	11414	cacoP7gpep1.11234.11234.3	controllerType=0 controllerNumber=1 scan=11234	36.1877
12011:3	14	R.LEN[+1540.529]ITTGTYTIHAQK.E	HexNAc(2)Hex(7)Fuc(0)NeuAc(0)	N[+1541]	1077.48	3	3230.42	3230.41	0	4.7	367	Specific	805.8	603.26	603.26	15.14	9	>sp|Q5JPE7|NOMO2_HUMAN Nodal modulator 2 OS=Homo sapiens GN=NOMO2 PE=1 SV=1	11414	cacoP7gpep1.11165.11165.3	controllerType=0 controllerNumber=1 scan=11165	35.8893
11888:3	14	R.LEN[+1702.581]ITTGTYTIHAQK.E	HexNAc(2)Hex(8)Fuc(0)NeuAc(0)	N[+1703]	1131.5	3	3392.48	3392.46	0	4.6	367	Specific	820.52	673.28	673.28	15.14	9	>sp|Q5JPE7|NOMO2_HUMAN Nodal modulator 2 OS=Homo sapiens GN=NOMO2 PE=1 SV=1	11414	cacoP7gpep1.11069.11069.3	controllerType=0 controllerNumber=1 scan=11069	35.5
13155:3	14	R.ENVGIYN[+1864.634]LSK.G	HexNAc(2)Hex(9)Fuc(0)NeuAc(0)	N[+1865]	1001.08	3	3001.24	3001.23	0	3.7	612	Specific	279.95	121.1	121.1	5.21	9	>sp|Q5JPE7|NOMO2_HUMAN Nodal modulator 2 OS=Homo sapiens GN=NOMO2 PE=1 SV=1	11414	cacoP7gpep1.12033.12033.3	controllerType=0 controllerNumber=1 scan=12033	39.5901
13518:2	14	R.ENVGIYN[+1378.476]LSK.G	HexNAc(2)Hex(6)Fuc(0)NeuAc(0)	N[+1378]	1258.05	2	2515.09	2515.07	0	6.4	612	Specific	469.73	279.58	279.58	6.24	9	>sp|Q5JPE7|NOMO2_HUMAN Nodal modulator 2 OS=Homo sapiens GN=NOMO2 PE=1 SV=1	11414	cacoP7gpep1.12317.12317.2	controllerType=0 controllerNumber=1 scan=12317	40.901
13345:2	14	R.ENVGIYN[+1540.529]LSK.G	HexNAc(2)Hex(7)Fuc(0)NeuAc(0)	N[+1541]	1339.07	2	2677.13	2677.12	0	3.7	612	Specific	553.89	323.26	323.26	7.02	9	>sp|Q5JPE7|NOMO2_HUMAN Nodal modulator 2 OS=Homo sapiens GN=NOMO2 PE=1 SV=1	11414	cacoP7gpep1.12184.12184.2	controllerType=0 controllerNumber=1 scan=12184	40.2768
13249:2	14	R.ENVGIYN[+1702.581]LSK.G	HexNAc(2)Hex(8)Fuc(0)NeuAc(0)	N[+1703]	1420.1	2	2839.19	2839.18	0	4.7	612	Specific	566.55	299.51	299.51	6.96	9	>sp|Q5JPE7|NOMO2_HUMAN Nodal modulator 2 OS=Homo sapiens GN=NOMO2 PE=1 SV=1	11414	cacoP7gpep1.12108.12108.2	controllerType=0 controllerNumber=1 scan=12108	39.9242
13359:2	14	R.ENVGIYN[+1540.529]LSK.G	HexNAc(2)Hex(7)Fuc(0)NeuAc(0)	N[+1541]	1339.07	2	2677.13	2677.12	0	2.7	612	Specific	591.49	362.24	362.24	8.79	9	>sp|Q5JPE7|NOMO2_HUMAN Nodal modulator 2 OS=Homo sapiens GN=NOMO2 PE=1 SV=1	11414	cacoP7gpep1.12196.12196.2	controllerType=0 controllerNumber=1 scan=12196	40.3347
13272:2	14	R.ENVGIYN[+1702.581]LSK.G	HexNAc(2)Hex(8)Fuc(0)NeuAc(0)	N[+1703]	1420.1	2	2839.19	2839.18	0	5.6	612	Specific	616.25	366.85	366.85	9.65	9	>sp|Q5JPE7|NOMO2_HUMAN Nodal modulator 2 OS=Homo sapiens GN=NOMO2 PE=1 SV=1	11414	cacoP7gpep1.12126.12126.2	controllerType=0 controllerNumber=1 scan=12126	40.0021
13163:2	14	R.ENVGIYN[+1864.634]LSK.G	HexNAc(2)Hex(9)Fuc(0)NeuAc(0)	N[+1865]	1501.13	2	3001.25	3001.23	0	5.6	612	Specific	631.98	397.88	397.88	10.95	9	>sp|Q5JPE7|NOMO2_HUMAN Nodal modulator 2 OS=Homo sapiens GN=NOMO2 PE=1 SV=1	11414	cacoP7gpep1.12038.12038.2	controllerType=0 controllerNumber=1 scan=12038	39.6138
13148:2	14	R.ENVGIYN[+1864.634]LSK.G	HexNAc(2)Hex(9)Fuc(0)NeuAc(0)	N[+1865]	1501.13	2	3001.25	3001.23	0	6.8	612	Specific	705.48	396.79	396.79	12.79	9	>sp|Q5JPE7|NOMO2_HUMAN Nodal modulator 2 OS=Homo sapiens GN=NOMO2 PE=1 SV=1	11414	cacoP7gpep1.12028.12028.2	controllerType=0 controllerNumber=1 scan=12028	39.5721
13168:2	14	R.ENVGIYN[+1864.634]LSK.G	HexNAc(2)Hex(9)Fuc(0)NeuAc(0)	N[+1865]	1501.13	2	3001.24	3001.23	0	4.8	612	Specific	708.45	401.8	401.8	13	9	>sp|Q5JPE7|NOMO2_HUMAN Nodal modulator 2 OS=Homo sapiens GN=NOMO2 PE=1 SV=1	11414	cacoP7gpep1.12043.12043.2	controllerType=0 controllerNumber=1 scan=12043	39.6363
07600:3	16	R.GYYN[+2263.835]QSEAGSHTVQR.M	HexNAc(5)Hex(5)Fuc(3)NeuAc(0)	N[+2264]	1320.88	3	3960.62	3960.6	0	4.9	107	Specific	279.7	138.03	138.03	5.61	14	>sp|P01892|1A02_HUMAN HLA class I histocompatibility antigen, A-2 alpha chain OS=Homo sapiens GN=HLA-A PE=1 SV=1	9	cacoP7gpep1.7661.7661.3	controllerType=0 controllerNumber=1 scan=7661	24.8776
04422:3	16	R.GYYN[+1955.724]QSEAGSHTVQR.M	HexNAc(5)Hex(4)Fuc(2)NeuAc(0)	N[+1956]	1218.18	3	3652.52	3652.49	0	7	107	Specific	345.42	171.38	171.38	5.92	14	>sp|P01892|1A02_HUMAN HLA class I histocompatibility antigen, A-2 alpha chain OS=Homo sapiens GN=HLA-A PE=1 SV=1	9	cacoP7gpep1.5328.5328.3	controllerType=0 controllerNumber=1 scan=5328	18.7513
04190:3	16	R.GYYN[+2101.782]QSEAGSHTVQR.M	HexNAc(5)Hex(4)Fuc(3)NeuAc(0)	N[+2102]	1266.86	3	3798.56	3798.55	0	1.9	107	Specific	367.72	230.02	230.02	6.2	14	>sp|P01892|1A02_HUMAN HLA class I histocompatibility antigen, A-2 alpha chain OS=Homo sapiens GN=HLA-A PE=1 SV=1	9	cacoP7gpep1.5160.5160.3	controllerType=0 controllerNumber=1 scan=5160	18.2829
04238:3	16	R.GYYN[+2060.755]QSEAGSHTVQR.M	HexNAc(4)Hex(5)Fuc(3)NeuAc(0)	N[+2061]	1253.19	3	3757.55	3757.52	0	7.6	107	Specific	406.48	199.5	199.5	6.1	14	>sp|P01892|1A02_HUMAN HLA class I histocompatibility antigen, A-2 alpha chain OS=Homo sapiens GN=HLA-A PE=1 SV=1	9	cacoP7gpep1.5195.5195.3	controllerType=0 controllerNumber=1 scan=5195	18.37
04153:3	16	R.GYYN[+2060.755]QSEAGSHTVQR.M	HexNAc(4)Hex(5)Fuc(3)NeuAc(0)	N[+2061]	1253.19	3	3757.55	3757.52	0	6.5	107	Specific	419.57	268.2	268.2	6.15	14	>sp|P01892|1A02_HUMAN HLA class I histocompatibility antigen, A-2 alpha chain OS=Homo sapiens GN=HLA-A PE=1 SV=1	9	cacoP7gpep1.5132.5132.3	controllerType=0 controllerNumber=1 scan=5132	18.2037
04839:3	16	R.GYYN[+2117.777]QSEAGSHTVQR.M	HexNAc(5)Hex(5)Fuc(2)NeuAc(0)	N[+2118]	1272.18	3	3814.54	3814.54	0	-1.1	107	Specific	460.23	307.28	307.28	6.31	14	>sp|P01892|1A02_HUMAN HLA class I histocompatibility antigen, A-2 alpha chain OS=Homo sapiens GN=HLA-A PE=1 SV=1	9	cacoP7gpep1.5639.5639.3	controllerType=0 controllerNumber=1 scan=5639	19.6515
04182:3	16	R.GYYN[+2060.755]QSEAGSHTVQR.M	HexNAc(4)Hex(5)Fuc(3)NeuAc(0)	N[+2061]	1253.18	3	3757.53	3757.52	0	0.8	107	Specific	466.48	254.03	254.03	6.42	14	>sp|P01892|1A02_HUMAN HLA class I histocompatibility antigen, A-2 alpha chain OS=Homo sapiens GN=HLA-A PE=1 SV=1	9	cacoP7gpep1.5155.5155.3	controllerType=0 controllerNumber=1 scan=5155	18.2653
04208:3	16	R.GYYN[+2409.893]QSEAGSHTVQR.M	HexNAc(5)Hex(5)Fuc(4)NeuAc(0)	N[+2410]	1369.56	3	4106.66	4106.66	0	0.1	107	Specific	488.76	306.52	12.32	6.63	14	>sp|P01892|1A02_HUMAN HLA class I histocompatibility antigen, A-2 alpha chain OS=Homo sapiens GN=HLA-A PE=1 SV=1	9	cacoP7gpep1.5172.5172.3	controllerType=0 controllerNumber=1 scan=5172	18.3127
07105:3	16	R.GYYN[+2262.814]QSEAGSHTVQR.M	HexNAc(5)Hex(5)Fuc(1)NeuAc(1)	N[+2263]	1320.53	3	3959.58	3959.58	0	0.7	107	Specific	508.55	242.4	242.4	6.58	14	>sp|P01892|1A02_HUMAN HLA class I histocompatibility antigen, A-2 alpha chain OS=Homo sapiens GN=HLA-A PE=1 SV=1	9	cacoP7gpep1.7267.7267.3	controllerType=0 controllerNumber=1 scan=7267	23.7323
04434:3	16	R.GYYN[+2117.777]QSEAGSHTVQR.M	HexNAc(5)Hex(5)Fuc(2)NeuAc(0)	N[+2118]	1272.19	3	3814.55	3814.54	0	1.5	107	Specific	511.22	261.18	261.18	6.76	14	>sp|P01892|1A02_HUMAN HLA class I histocompatibility antigen, A-2 alpha chain OS=Homo sapiens GN=HLA-A PE=1 SV=1	9	cacoP7gpep1.5340.5340.3	controllerType=0 controllerNumber=1 scan=5340	18.7897
06761:3	16	R.GYYN[+2408.872]QSEAGSHTVQR.M	HexNAc(5)Hex(5)Fuc(2)NeuAc(1)	N[+2409]	1369.56	3	4106.66	4105.64	1	3.6	107	Specific	517.1	253.74	29.56	6.61	14	>sp|P01892|1A02_HUMAN HLA class I histocompatibility antigen, A-2 alpha chain OS=Homo sapiens GN=HLA-A PE=1 SV=1	9	cacoP7gpep1.7012.7012.3	controllerType=0 controllerNumber=1 scan=7012	23.067
04485:3	16	R.GYYN[+2117.777]QSEAGSHTVQR.M	HexNAc(5)Hex(5)Fuc(2)NeuAc(0)	N[+2118]	1272.19	3	3814.56	3814.54	0	4	107	Specific	538.5	319.19	319.19	7	14	>sp|P01892|1A02_HUMAN HLA class I histocompatibility antigen, A-2 alpha chain OS=Homo sapiens GN=HLA-A PE=1 SV=1	9	cacoP7gpep1.5376.5376.3	controllerType=0 controllerNumber=1 scan=5376	18.8883
07190:3	16	R.GYYN[+2408.872]QSEAGSHTVQR.M	HexNAc(5)Hex(5)Fuc(2)NeuAc(1)	N[+2409]	1369.23	3	4105.68	4105.64	0	9.2	107	Specific	553.8	243.35	24.66	6.35	14	>sp|P01892|1A02_HUMAN HLA class I histocompatibility antigen, A-2 alpha chain OS=Homo sapiens GN=HLA-A PE=1 SV=1	9	cacoP7gpep1.7337.7337.3	controllerType=0 controllerNumber=1 scan=7337	23.9482
04480:3	16	R.GYYN[+2263.835]QSEAGSHTVQR.M	HexNAc(5)Hex(5)Fuc(3)NeuAc(0)	N[+2264]	1320.87	3	3960.6	3960.6	0	-0.6	107	Specific	560.92	290.88	290.88	6.86	14	>sp|P01892|1A02_HUMAN HLA class I histocompatibility antigen, A-2 alpha chain OS=Homo sapiens GN=HLA-A PE=1 SV=1	9	cacoP7gpep1.5372.5372.3	controllerType=0 controllerNumber=1 scan=5372	18.8741
04217:3	16	R.GYYN[+2263.835]QSEAGSHTVQR.M	HexNAc(5)Hex(5)Fuc(3)NeuAc(0)	N[+2264]	1320.88	3	3960.62	3960.6	0	4.1	107	Specific	567.88	376.95	376.95	7.56	14	>sp|P01892|1A02_HUMAN HLA class I histocompatibility antigen, A-2 alpha chain OS=Homo sapiens GN=HLA-A PE=1 SV=1	9	cacoP7gpep1.5179.5179.3	controllerType=0 controllerNumber=1 scan=5179	18.3304
04729:3	16	R.GYYN[+1971.719]QSEAGSHTVQR.M	HexNAc(5)Hex(5)Fuc(1)NeuAc(0)	N[+1972]	1223.5	3	3668.5	3668.49	0	3.8	107	Specific	568.18	296.55	296.55	7.08	14	>sp|P01892|1A02_HUMAN HLA class I histocompatibility antigen, A-2 alpha chain OS=Homo sapiens GN=HLA-A PE=1 SV=1	9	cacoP7gpep1.5556.5556.3	controllerType=0 controllerNumber=1 scan=5556	19.4254
04525:3	16	R.GYYN[+2263.835]QSEAGSHTVQR.M	HexNAc(5)Hex(5)Fuc(3)NeuAc(0)	N[+2264]	1320.88	3	3960.62	3960.6	0	5.2	107	Specific	582.56	262.91	262.91	8.28	14	>sp|P01892|1A02_HUMAN HLA class I histocompatibility antigen, A-2 alpha chain OS=Homo sapiens GN=HLA-A PE=1 SV=1	9	cacoP7gpep1.5405.5405.3	controllerType=0 controllerNumber=1 scan=5405	18.9694
04125:3	16	R.GYYN[+1864.634]QSEAGSHTVQR.M	HexNAc(2)Hex(9)Fuc(0)NeuAc(0)	N[+1865]	1187.81	3	3561.41	3561.4	0	3.7	107	Specific	661.38	453.72	453.72	12.12	14	>sp|P01892|1A02_HUMAN HLA class I histocompatibility antigen, A-2 alpha chain OS=Homo sapiens GN=HLA-A PE=1 SV=1	9	cacoP7gpep1.5114.5114.3	controllerType=0 controllerNumber=1 scan=5114	18.1687
04156:3	16	R.GYYN[+2026.687]QSEAGSHTVQR.M	HexNAc(2)Hex(10)Fuc(0)NeuAc(0)	N[+2027]	1241.83	3	3723.47	3723.45	0	5.1	107	Specific	717.03	468.8	468.8	13.14	14	>sp|P01892|1A02_HUMAN HLA class I histocompatibility antigen, A-2 alpha chain OS=Homo sapiens GN=HLA-A PE=1 SV=1	9	cacoP7gpep1.5135.5135.3	controllerType=0 controllerNumber=1 scan=5135	18.2123
04194:3	16	R.GYYN[+1702.581]QSEAGSHTVQR.M	HexNAc(2)Hex(8)Fuc(0)NeuAc(0)	N[+1703]	1133.79	3	3399.35	3399.35	0	0.5	107	Specific	744.21	478.6	478.6	13.08	14	>sp|P01892|1A02_HUMAN HLA class I histocompatibility antigen, A-2 alpha chain OS=Homo sapiens GN=HLA-A PE=1 SV=1	9	cacoP7gpep1.5164.5164.3	controllerType=0 controllerNumber=1 scan=5164	18.2959
18954:3	17	R.VIN[+1540.529]QTTC[+57.021]ENLLPQQITPR.M	HexNAc(2)Hex(7)Fuc(0)NeuAc(0)	C[+57], N[+1541]	1222.55	3	3665.65	3665.64	0	3.2	770	Specific	111.5	93.48	93.48	2	8	>sp|Q9Y5Y6|ST14_HUMAN Suppressor of tumorigenicity 14 protein OS=Homo sapiens GN=ST14 PE=1 SV=2	16556	cacoP7gpep1.16521.16521.3	controllerType=0 controllerNumber=1 scan=16521	61.8152
18995:3	17	R.VIN[+1378.476]QTTC[+57.021]ENLLPQQITPR.M	HexNAc(2)Hex(6)Fuc(0)NeuAc(0)	C[+57], N[+1378]	1168.54	3	3503.6	3503.58	0	3.5	770	Specific	195.23	148.58	148.58	2.78	8	>sp|Q9Y5Y6|ST14_HUMAN Suppressor of tumorigenicity 14 protein OS=Homo sapiens GN=ST14 PE=1 SV=2	16556	cacoP7gpep1.16563.16563.3	controllerType=0 controllerNumber=1 scan=16563	62.0161
18854:3	17	R.VIN[+1702.581]QTTC[+57.021]ENLLPQQITPR.M	HexNAc(2)Hex(8)Fuc(0)NeuAc(0)	C[+57], N[+1703]	1276.57	3	3827.7	3827.69	0	3.4	770	Specific	256.47	176.75	176.75	4.95	8	>sp|Q9Y5Y6|ST14_HUMAN Suppressor of tumorigenicity 14 protein OS=Homo sapiens GN=ST14 PE=1 SV=2	16556	cacoP7gpep1.16434.16434.3	controllerType=0 controllerNumber=1 scan=16434	61.3881
19160:3	17	R.VIN[+1216.423]QTTC[+57.021]ENLLPQQITPR.M	HexNAc(2)Hex(5)Fuc(0)NeuAc(0)	C[+57], N[+1216]	1114.52	3	3341.54	3341.53	0	4.3	770	Specific	278.41	221.03	221.03	6.14	8	>sp|Q9Y5Y6|ST14_HUMAN Suppressor of tumorigenicity 14 protein OS=Homo sapiens GN=ST14 PE=1 SV=2	16556	cacoP7gpep1.16706.16706.3	controllerType=0 controllerNumber=1 scan=16706	62.6913
19021:3	17	R.VIN[+1622.582]QTTC[+57.021]ENLLPQQITPR.M	HexNAc(4)Hex(5)Fuc(0)NeuAc(0)	C[+57], N[+1623]	1249.91	3	3747.71	3747.69	0	5.4	770	Specific	322.81	246.45	246.45	6.42	8	>sp|Q9Y5Y6|ST14_HUMAN Suppressor of tumorigenicity 14 protein OS=Homo sapiens GN=ST14 PE=1 SV=2	16556	cacoP7gpep1.16581.16581.3	controllerType=0 controllerNumber=1 scan=16581	62.1061
18948:3	17	R.VIN[+1784.634]QTTC[+57.021]ENLLPQQITPR.M	HexNAc(4)Hex(6)Fuc(0)NeuAc(0)	C[+57], N[+1785]	1303.93	3	3909.77	3909.74	0	8	770	Specific	448	380.01	380.01	8.52	8	>sp|Q9Y5Y6|ST14_HUMAN Suppressor of tumorigenicity 14 protein OS=Homo sapiens GN=ST14 PE=1 SV=2	16556	cacoP7gpep1.16514.16514.3	controllerType=0 controllerNumber=1 scan=16514	61.781
18936:3	17	R.VIN[+1784.634]QTTC[+57.021]ENLLPQQITPR.M	HexNAc(4)Hex(6)Fuc(0)NeuAc(0)	C[+57], N[+1785]	1303.93	3	3909.76	3909.74	0	5.3	770	Specific	464.27	364.45	364.45	7.32	8	>sp|Q9Y5Y6|ST14_HUMAN Suppressor of tumorigenicity 14 protein OS=Homo sapiens GN=ST14 PE=1 SV=2	16556	cacoP7gpep1.16505.16505.3	controllerType=0 controllerNumber=1 scan=16505	61.736
18827:3	17	R.VIN[+1702.581]QTTC[+57.021]ENLLPQQITPR.M	HexNAc(2)Hex(8)Fuc(0)NeuAc(0)	C[+57], N[+1703]	1276.57	3	3827.7	3827.69	0	1.8	770	Specific	493.65	424.27	424.27	8.8	8	>sp|Q9Y5Y6|ST14_HUMAN Suppressor of tumorigenicity 14 protein OS=Homo sapiens GN=ST14 PE=1 SV=2	16556	cacoP7gpep1.16416.16416.3	controllerType=0 controllerNumber=1 scan=16416	61.2979
18783:3	17	R.VIN[+2026.687]QTTC[+57.021]ENLLPQQITPR.M	HexNAc(2)Hex(10)Fuc(0)NeuAc(0)	C[+57], N[+2027]	1384.6	3	4151.78	4151.79	0	-2.9	770	Specific	509.67	418.59	418.59	8.21	8	>sp|Q9Y5Y6|ST14_HUMAN Suppressor of tumorigenicity 14 protein OS=Homo sapiens GN=ST14 PE=1 SV=2	16556	cacoP7gpep1.16379.16379.3	controllerType=0 controllerNumber=1 scan=16379	61.1147
19002:3	17	R.VIN[+1216.423]QTTC[+57.021]ENLLPQQITPR.M	HexNAc(2)Hex(5)Fuc(0)NeuAc(0)	C[+57], N[+1216]	1114.51	3	3341.53	3341.53	0	-0.8	770	Specific	624.36	508.26	508.26	11.17	8	>sp|Q9Y5Y6|ST14_HUMAN Suppressor of tumorigenicity 14 protein OS=Homo sapiens GN=ST14 PE=1 SV=2	16556	cacoP7gpep1.16567.16567.3	controllerType=0 controllerNumber=1 scan=16567	62.0377
18751:3	17	R.VIN[+2026.687]QTTC[+57.021]ENLLPQQITPR.M	HexNAc(2)Hex(10)Fuc(0)NeuAc(0)	C[+57], N[+2027]	1384.61	3	4151.81	4151.79	0	3.3	770	Specific	647.11	492.96	492.96	11.39	8	>sp|Q9Y5Y6|ST14_HUMAN Suppressor of tumorigenicity 14 protein OS=Homo sapiens GN=ST14 PE=1 SV=2	16556	cacoP7gpep1.16352.16352.3	controllerType=0 controllerNumber=1 scan=16352	60.9786
19027:3	17	R.VIN[+1216.423]QTTC[+57.021]ENLLPQQITPR.M	HexNAc(2)Hex(5)Fuc(0)NeuAc(0)	C[+57], N[+1216]	1114.52	3	3341.55	3341.53	0	6.1	770	Specific	650.52	524.85	524.85	12.36	8	>sp|Q9Y5Y6|ST14_HUMAN Suppressor of tumorigenicity 14 protein OS=Homo sapiens GN=ST14 PE=1 SV=2	16556	cacoP7gpep1.16587.16587.3	controllerType=0 controllerNumber=1 scan=16587	62.135
18871:3	17	R.VIN[+1540.529]QTTC[+57.021]ENLLPQQITPR.M	HexNAc(2)Hex(7)Fuc(0)NeuAc(0)	C[+57], N[+1541]	1222.56	3	3665.65	3665.64	0	5.3	770	Specific	692.46	627.89	627.89	12.36	8	>sp|Q9Y5Y6|ST14_HUMAN Suppressor of tumorigenicity 14 protein OS=Homo sapiens GN=ST14 PE=1 SV=2	16556	cacoP7gpep1.16447.16447.3	controllerType=0 controllerNumber=1 scan=16447	61.4551
18878:3	17	R.VIN[+1540.529]QTTC[+57.021]ENLLPQQITPR.M	HexNAc(2)Hex(7)Fuc(0)NeuAc(0)	C[+57], N[+1541]	1222.56	3	3665.65	3665.64	0	5.3	770	Specific	700	579.1	579.1	12.36	8	>sp|Q9Y5Y6|ST14_HUMAN Suppressor of tumorigenicity 14 protein OS=Homo sapiens GN=ST14 PE=1 SV=2	16556	cacoP7gpep1.16455.16455.3	controllerType=0 controllerNumber=1 scan=16455	61.4909
18754:3	17	R.VIN[+1864.634]QTTC[+57.021]ENLLPQQITPR.M	HexNAc(2)Hex(9)Fuc(0)NeuAc(0)	C[+57], N[+1865]	1330.59	3	3989.75	3989.74	0	2.1	770	Specific	751.84	625.42	625.42	14.43	8	>sp|Q9Y5Y6|ST14_HUMAN Suppressor of tumorigenicity 14 protein OS=Homo sapiens GN=ST14 PE=1 SV=2	16556	cacoP7gpep1.16354.16354.3	controllerType=0 controllerNumber=1 scan=16354	60.9895
18804:3	17	R.VIN[+1702.581]QTTC[+57.021]ENLLPQQITPR.M	HexNAc(2)Hex(8)Fuc(0)NeuAc(0)	C[+57], N[+1703]	1276.57	3	3827.71	3827.69	0	4.4	770	Specific	774.94	649.84	649.84	14.41	8	>sp|Q9Y5Y6|ST14_HUMAN Suppressor of tumorigenicity 14 protein OS=Homo sapiens GN=ST14 PE=1 SV=2	16556	cacoP7gpep1.16394.16394.3	controllerType=0 controllerNumber=1 scan=16394	61.193
18985:3	17	R.VIN[+1378.476]QTTC[+57.021]ENLLPQQITPR.M	HexNAc(2)Hex(6)Fuc(0)NeuAc(0)	C[+57], N[+1378]	1168.54	3	3503.6	3503.58	0	3.5	770	Specific	783.66	644.76	644.76	14.39	8	>sp|Q9Y5Y6|ST14_HUMAN Suppressor of tumorigenicity 14 protein OS=Homo sapiens GN=ST14 PE=1 SV=2	16556	cacoP7gpep1.16553.16553.3	controllerType=0 controllerNumber=1 scan=16553	61.9691
18760:3	17	R.VIN[+1864.634]QTTC[+57.021]ENLLPQQITPR.M	HexNAc(2)Hex(9)Fuc(0)NeuAc(0)	C[+57], N[+1865]	1330.59	3	3989.76	3989.74	0	4	770	Specific	856.8	702.4	702.4	16.39	8	>sp|Q9Y5Y6|ST14_HUMAN Suppressor of tumorigenicity 14 protein OS=Homo sapiens GN=ST14 PE=1 SV=2	16556	cacoP7gpep1.16359.16359.3	controllerType=0 controllerNumber=1 scan=16359	61.0131
05072:2	19	R.N[+1540.529]TTFNVESTK.K	HexNAc(2)Hex(7)Fuc(0)NeuAc(0)	N[+1541]	1341.05	2	2681.1	2681.08	0	6.4	418	Specific	481.32	340.68	340.68	6.71	15	>sp|P56199|ITA1_HUMAN Integrin alpha-1 OS=Homo sapiens GN=ITGA1 PE=1 SV=2	8355	cacoP7gpep1.5808.5808.2	controllerType=0 controllerNumber=1 scan=5808	20.1038
04961:2	19	R.N[+1540.529]TTFNVESTK.K	HexNAc(2)Hex(7)Fuc(0)NeuAc(0)	N[+1541]	1341.05	2	2681.1	2681.08	0	6	418	Specific	507.64	349.15	349.15	6.91	15	>sp|P56199|ITA1_HUMAN Integrin alpha-1 OS=Homo sapiens GN=ITGA1 PE=1 SV=2	8355	cacoP7gpep1.5727.5727.2	controllerType=0 controllerNumber=1 scan=5727	19.8854
04822:2	19	R.N[+1702.581]TTFNVESTK.K	HexNAc(2)Hex(8)Fuc(0)NeuAc(0)	N[+1703]	1422.07	2	2843.14	2843.13	0	1.4	418	Specific	533.65	353.21	353.21	7.08	15	>sp|P56199|ITA1_HUMAN Integrin alpha-1 OS=Homo sapiens GN=ITGA1 PE=1 SV=2	8355	cacoP7gpep1.5626.5626.2	controllerType=0 controllerNumber=1 scan=5626	19.6147
04833:2	19	R.N[+1702.581]TTFNVESTK.K	HexNAc(2)Hex(8)Fuc(0)NeuAc(0)	N[+1703]	1422.08	2	2843.15	2843.13	0	4.8	418	Specific	570.41	375.24	375.24	7.44	15	>sp|P56199|ITA1_HUMAN Integrin alpha-1 OS=Homo sapiens GN=ITGA1 PE=1 SV=2	8355	cacoP7gpep1.5634.5634.2	controllerType=0 controllerNumber=1 scan=5634	19.6385
07117:2	19	R.YN[+1864.634]HTGQVIIYR.M	HexNAc(2)Hex(9)Fuc(0)NeuAc(0)	N[+1865]	1614.68	2	3228.36	3228.35	0	5	459	Specific	476.16	290.11	290.11	5.22	15	>sp|P56199|ITA1_HUMAN Integrin alpha-1 OS=Homo sapiens GN=ITGA1 PE=1 SV=2	8355	cacoP7gpep1.7276.7276.2	controllerType=0 controllerNumber=1 scan=7276	23.7588
07103:3	19	R.YN[+1702.581]HTGQVIIYR.M	HexNAc(2)Hex(8)Fuc(0)NeuAc(0)	N[+1703]	1022.77	3	3066.3	3066.29	0	3.7	459	Specific	639.26	412.12	412.12	10.98	15	>sp|P56199|ITA1_HUMAN Integrin alpha-1 OS=Homo sapiens GN=ITGA1 PE=1 SV=2	8355	cacoP7gpep1.7266.7266.3	controllerType=0 controllerNumber=1 scan=7266	23.7297
07046:3	19	R.YN[+1864.634]HTGQVIIYR.M	HexNAc(2)Hex(9)Fuc(0)NeuAc(0)	N[+1865]	1076.79	3	3228.36	3228.35	0	3.3	459	Specific	705.72	482.5	482.5	12.98	15	>sp|P56199|ITA1_HUMAN Integrin alpha-1 OS=Homo sapiens GN=ITGA1 PE=1 SV=2	8355	cacoP7gpep1.7224.7224.3	controllerType=0 controllerNumber=1 scan=7224	23.6153
13355:3	19	K.VYVYALN[+1809.666]QTR.F	HexNAc(5)Hex(4)Fuc(1)NeuAc(0)	N[+1810]	1012.78	3	3036.32	3036.32	0	2	526	Specific	302.54	116.48	116.48	5.17	15	>sp|P56199|ITA1_HUMAN Integrin alpha-1 OS=Homo sapiens GN=ITGA1 PE=1 SV=2	8355	cacoP7gpep1.12193.12193.3	controllerType=0 controllerNumber=1 scan=12193	40.3194
13061:3	19	K.VYVYALN[+1768.640]QTR.F	HexNAc(4)Hex(5)Fuc(1)NeuAc(0)	N[+1769]	999.104	3	2995.3	2995.29	0	1.9	526	Specific	335.64	174.19	174.19	5.77	15	>sp|P56199|ITA1_HUMAN Integrin alpha-1 OS=Homo sapiens GN=ITGA1 PE=1 SV=2	8355	cacoP7gpep1.11962.11962.3	controllerType=0 controllerNumber=1 scan=11962	39.2831
13298:2	19	K.VYVYALN[+1971.719]QTR.F	HexNAc(5)Hex(5)Fuc(1)NeuAc(0)	N[+1972]	1599.69	2	3198.37	3198.37	0	0.5	526	Specific	340.44	88.68	88.68	5.25	15	>sp|P56199|ITA1_HUMAN Integrin alpha-1 OS=Homo sapiens GN=ITGA1 PE=1 SV=2	8355	cacoP7gpep1.12146.12146.2	controllerType=0 controllerNumber=1 scan=12146	40.0961
13242:3	19	K.VYVYALN[+1971.719]QTR.F	HexNAc(5)Hex(5)Fuc(1)NeuAc(0)	N[+1972]	1066.8	3	3198.38	3198.37	0	2.3	526	Specific	427.59	171.99	171.99	6.03	15	>sp|P56199|ITA1_HUMAN Integrin alpha-1 OS=Homo sapiens GN=ITGA1 PE=1 SV=2	8355	cacoP7gpep1.12103.12103.3	controllerType=0 controllerNumber=1 scan=12103	39.8968
01366:3	19	K.DSC[+57.021]ESNHN[+1540.529]ITC[+57.021]K.V	HexNAc(2)Hex(7)Fuc(0)NeuAc(0)	C[+57]*2, N[+1541]	1002.38	3	3005.11	3005.11	0	0.1	876	Specific	297.61	218.66	218.66	5.8	15	>sp|P56199|ITA1_HUMAN Integrin alpha-1 OS=Homo sapiens GN=ITGA1 PE=1 SV=2	8355	cacoP7gpep1.2908.2908.3	controllerType=0 controllerNumber=1 scan=2908	11.6827
01352:3	19	K.DSC[+57.021]ESNHN[+1702.581]ITC[+57.021]K.V	HexNAc(2)Hex(8)Fuc(0)NeuAc(0)	C[+57]*2, N[+1703]	1056.39	3	3167.17	3167.17	0	0.3	876	Specific	408.35	329.51	329.51	6.52	15	>sp|P56199|ITA1_HUMAN Integrin alpha-1 OS=Homo sapiens GN=ITGA1 PE=1 SV=2	8355	cacoP7gpep1.2898.2898.3	controllerType=0 controllerNumber=1 scan=2898	11.6533
01344:3	19	K.DSC[+57.021]ESNHN[+1864.634]ITC[+57.021]K.V	HexNAc(2)Hex(9)Fuc(0)NeuAc(0)	C[+57]*2, N[+1865]	1110.41	3	3329.23	3329.22	0	3.4	876	Specific	470.37	394.61	394.61	8.37	15	>sp|P56199|ITA1_HUMAN Integrin alpha-1 OS=Homo sapiens GN=ITGA1 PE=1 SV=2	8355	cacoP7gpep1.2891.2891.3	controllerType=0 controllerNumber=1 scan=2891	11.6327
01329:3	19	K.DSC[+57.021]ESNHN[+1864.634]ITC[+57.021]K.V	HexNAc(2)Hex(9)Fuc(0)NeuAc(0)	C[+57]*2, N[+1865]	1110.41	3	3329.23	3329.22	0	2.6	876	Specific	487.2	487.2	487.2	8.6	15	>sp|P56199|ITA1_HUMAN Integrin alpha-1 OS=Homo sapiens GN=ITGA1 PE=1 SV=2	8355	cacoP7gpep1.2878.2878.3	controllerType=0 controllerNumber=1 scan=2878	11.5902
08031:3	19	R.SEN[+1864.634]ASLVLSSSNQK.R	HexNAc(2)Hex(9)Fuc(0)NeuAc(0)	N[+1865]	1110.13	3	3328.38	3328.37	0	4.8	1111	Specific	534.98	375.78	375.78	7.12	15	>sp|P56199|ITA1_HUMAN Integrin alpha-1 OS=Homo sapiens GN=ITGA1 PE=1 SV=2	8355	cacoP7gpep1.8015.8015.3	controllerType=0 controllerNumber=1 scan=8015	25.7509
08131:3	19	R.SEN[+1702.581]ASLVLSSSNQK.R	HexNAc(2)Hex(8)Fuc(0)NeuAc(0)	N[+1703]	1056.11	3	3166.33	3166.32	0	4.1	1111	Specific	655.65	484.7	484.7	11.87	15	>sp|P56199|ITA1_HUMAN Integrin alpha-1 OS=Homo sapiens GN=ITGA1 PE=1 SV=2	8355	cacoP7gpep1.8089.8089.3	controllerType=0 controllerNumber=1 scan=8089	25.9699
08082:3	19	R.SEN[+1864.634]ASLVLSSSNQK.R	HexNAc(2)Hex(9)Fuc(0)NeuAc(0)	N[+1865]	1110.13	3	3328.38	3328.37	0	4	1111	Specific	760.88	580.26	580.26	13.87	15	>sp|P56199|ITA1_HUMAN Integrin alpha-1 OS=Homo sapiens GN=ITGA1 PE=1 SV=2	8355	cacoP7gpep1.8052.8052.3	controllerType=0 controllerNumber=1 scan=8052	25.8563
05508:3	19	R.SEN[+1702.581]ASLVLSSSNQKR.E	HexNAc(2)Hex(8)Fuc(0)NeuAc(0)	N[+1703]	1108.14	3	3322.42	3322.42	0	0.5	1111	Specific	388.01	223.39	223.39	6.19	15	>sp|P56199|ITA1_HUMAN Integrin alpha-1 OS=Homo sapiens GN=ITGA1 PE=1 SV=2	8355	cacoP7gpep1.6117.6117.3	controllerType=0 controllerNumber=1 scan=6117	20.8954
05430:3	19	R.SEN[+1864.634]ASLVLSSSNQKR.E	HexNAc(2)Hex(9)Fuc(0)NeuAc(0)	N[+1865]	1162.17	3	3484.49	3484.47	0	5	1111	Specific	397.67	214.21	214.21	6.29	15	>sp|P56199|ITA1_HUMAN Integrin alpha-1 OS=Homo sapiens GN=ITGA1 PE=1 SV=2	8355	cacoP7gpep1.6063.6063.3	controllerType=0 controllerNumber=1 scan=6063	20.7618
05397:3	19	R.SEN[+1864.634]ASLVLSSSNQKR.E	HexNAc(2)Hex(9)Fuc(0)NeuAc(0)	N[+1865]	1162.16	3	3484.47	3484.47	0	-1	1111	Specific	438.63	224.27	224.27	5.93	15	>sp|P56199|ITA1_HUMAN Integrin alpha-1 OS=Homo sapiens GN=ITGA1 PE=1 SV=2	8355	cacoP7gpep1.6038.6038.2	controllerType=0 controllerNumber=1 scan=6038	20.7017
09218:2	20	R.ALSN[+1864.634]ISLR.L	HexNAc(2)Hex(9)Fuc(0)NeuAc(0)	N[+1865]	1369.59	2	2738.17	2738.15	0	7.5	124	Specific	282.37	150.94	150.94	5.51	21	>sp|O15031|PLXB2_HUMAN Plexin-B2 OS=Homo sapiens GN=PLXNB2 PE=1 SV=3	13258	cacoP7gpep1.8923.8923.2	controllerType=0 controllerNumber=1 scan=8923	28.3999
09235:2	20	R.ALSN[+1864.634]ISLR.L	HexNAc(2)Hex(9)Fuc(0)NeuAc(0)	N[+1865]	1369.59	2	2738.16	2738.15	0	5.1	124	Specific	322.92	181.47	181.47	6.05	21	>sp|O15031|PLXB2_HUMAN Plexin-B2 OS=Homo sapiens GN=PLXNB2 PE=1 SV=3	13258	cacoP7gpep1.8936.8936.2	controllerType=0 controllerNumber=1 scan=8936	28.4374
09206:2	20	R.ALSN[+1702.581]ISLR.L	HexNAc(2)Hex(8)Fuc(0)NeuAc(0)	N[+1703]	1288.55	2	2576.1	2576.1	0	1.5	124	Specific	353.62	170.43	170.43	6	21	>sp|O15031|PLXB2_HUMAN Plexin-B2 OS=Homo sapiens GN=PLXNB2 PE=1 SV=3	13258	cacoP7gpep1.8914.8914.2	controllerType=0 controllerNumber=1 scan=8914	28.3765
08631:3	20	K.SC[+57.021]VAVTSAQPQN[+1378.476]MSR.R	HexNAc(2)Hex(6)Fuc(0)NeuAc(0)	C[+57], N[+1378]	1005.41	3	3014.23	3014.23	0	-1.6	517	Specific	285.5	199.06	199.06	5.32	21	>sp|O15031|PLXB2_HUMAN Plexin-B2 OS=Homo sapiens GN=PLXNB2 PE=1 SV=3	13258	cacoP7gpep1.8466.8466.3	controllerType=0 controllerNumber=1 scan=8466	27.1229
08402:3	20	K.SC[+57.021]VAVTSAQPQN[+1702.581]MSR.R	HexNAc(2)Hex(8)Fuc(0)NeuAc(0)	C[+57], N[+1703]	1113.45	3	3338.32	3338.34	0	-5.4	517	Specific	344.2	241.29	241.29	5.02	21	>sp|O15031|PLXB2_HUMAN Plexin-B2 OS=Homo sapiens GN=PLXNB2 PE=1 SV=3	13258	cacoP7gpep1.8295.8295.3	controllerType=0 controllerNumber=1 scan=8295	26.6349
08366:3	20	K.SC[+57.021]VAVTSAQPQN[+1864.634]MSR.R	HexNAc(2)Hex(9)Fuc(0)NeuAc(0)	C[+57], N[+1865]	1167.48	3	3500.42	3500.39	0	8.2	517	Specific	628.04	543.12	543.12	10.76	21	>sp|O15031|PLXB2_HUMAN Plexin-B2 OS=Homo sapiens GN=PLXNB2 PE=1 SV=3	13258	cacoP7gpep1.8269.8269.3	controllerType=0 controllerNumber=1 scan=8269	26.5347
17406:4	20	K.LSHDAN[+2262.814]ETLPLHLYVK.S	HexNAc(5)Hex(5)Fuc(1)NeuAc(1)	N[+2263]	1028.96	4	4112.81	4112.79	0	3.6	728	Specific	111.93	56.43	10.4	2.06	21	>sp|O15031|PLXB2_HUMAN Plexin-B2 OS=Homo sapiens GN=PLXNB2 PE=1 SV=3	13258	cacoP7gpep1.15308.15308.4	controllerType=0 controllerNumber=1 scan=15308	55.7524
17239:4	20	K.LSHDAN[+2205.793]ETLPLHLYVK.S	HexNAc(4)Hex(5)Fuc(2)NeuAc(1)	N[+2206]	1014.7	4	4055.79	4055.77	0	3.4	728	Specific	138.54	92.25	10.46	2.77	21	>sp|O15031|PLXB2_HUMAN Plexin-B2 OS=Homo sapiens GN=PLXNB2 PE=1 SV=3	13258	cacoP7gpep1.15177.15177.4	controllerType=0 controllerNumber=1 scan=15177	55.0999
14918:4	20	K.LSHDAN[+2117.777]ETLPLHLYVK.S	HexNAc(5)Hex(5)Fuc(2)NeuAc(0)	N[+2118]	992.697	4	3967.77	3967.76	0	2.7	728	Specific	180.26	115.2	115.2	2.81	21	>sp|O15031|PLXB2_HUMAN Plexin-B2 OS=Homo sapiens GN=PLXNB2 PE=1 SV=3	13258	cacoP7gpep1.13404.13404.4	controllerType=0 controllerNumber=1 scan=13404	46.2625
14991:3	20	K.LSHDAN[+2117.777]ETLPLHLYVK.S	HexNAc(5)Hex(5)Fuc(2)NeuAc(0)	N[+2118]	1323.26	3	3967.77	3967.76	0	2.3	728	Specific	302.64	193.21	193.21	6.17	21	>sp|O15031|PLXB2_HUMAN Plexin-B2 OS=Homo sapiens GN=PLXNB2 PE=1 SV=3	13258	cacoP7gpep1.13460.13460.3	controllerType=0 controllerNumber=1 scan=13460	46.546
17250:4	20	K.LSHDAN[+2408.872]ETLPLHLYVK.S	HexNAc(5)Hex(5)Fuc(2)NeuAc(1)	N[+2409]	1065.47	4	4258.86	4258.85	0	2.2	728	Specific	367.28	257.17	15.93	6.74	21	>sp|O15031|PLXB2_HUMAN Plexin-B2 OS=Homo sapiens GN=PLXNB2 PE=1 SV=3	13258	cacoP7gpep1.15186.15186.4	controllerType=0 controllerNumber=1 scan=15186	55.1445
15898:3	20	K.LHVTLYN[+1378.476]C[+57.021]SFGR.S	HexNAc(2)Hex(6)Fuc(0)NeuAc(0)	C[+57], N[+1378]	949.073	3	2845.21	2845.2	0	3.2	753	Specific	302.09	79.93	79.93	5.21	21	>sp|O15031|PLXB2_HUMAN Plexin-B2 OS=Homo sapiens GN=PLXNB2 PE=1 SV=3	13258	cacoP7gpep1.14161.14161.3	controllerType=0 controllerNumber=1 scan=14161	50.022
15751:3	20	K.LHVTLYN[+1702.581]C[+57.021]SFGR.S	HexNAc(2)Hex(8)Fuc(0)NeuAc(0)	C[+57], N[+1703]	1057.11	3	3169.33	3169.3	0	7.4	753	Specific	454.07	226.37	226.37	6.31	21	>sp|O15031|PLXB2_HUMAN Plexin-B2 OS=Homo sapiens GN=PLXNB2 PE=1 SV=3	13258	cacoP7gpep1.14055.14055.3	controllerType=0 controllerNumber=1 scan=14055	49.4918
15665:3	20	K.LHVTLYN[+1864.634]C[+57.021]SFGR.S	HexNAc(2)Hex(9)Fuc(0)NeuAc(0)	C[+57], N[+1865]	1111.13	3	3331.36	3331.36	0	2.8	753	Specific	601.29	420.13	420.13	11.23	21	>sp|O15031|PLXB2_HUMAN Plexin-B2 OS=Homo sapiens GN=PLXNB2 PE=1 SV=3	13258	cacoP7gpep1.13984.13984.3	controllerType=0 controllerNumber=1 scan=13984	49.1386
15691:3	20	K.LHVTLYN[+1864.634]C[+57.021]SFGR.S	HexNAc(2)Hex(9)Fuc(0)NeuAc(0)	C[+57], N[+1865]	1111.13	3	3331.37	3331.36	0	4.7	753	Specific	643.16	341.74	341.74	9.69	21	>sp|O15031|PLXB2_HUMAN Plexin-B2 OS=Homo sapiens GN=PLXNB2 PE=1 SV=3	13258	cacoP7gpep1.14005.14005.3	controllerType=0 controllerNumber=1 scan=14005	49.2403
19278:3	20	R.C[+57.021]VYEALC[+57.021]N[+1864.634]TTSEC[+57.021]PPPVITR.I	HexNAc(2)Hex(9)Fuc(0)NeuAc(0)	C[+57]*3, N[+1865]	1411.25	3	4231.74	4231.71	0	6.8	788	Specific	478.77	367.89	367.89	7.45	21	>sp|O15031|PLXB2_HUMAN Plexin-B2 OS=Homo sapiens GN=PLXNB2 PE=1 SV=3	13258	cacoP7gpep1.16827.16827.3	controllerType=0 controllerNumber=1 scan=16827	63.2051
19336:3	20	R.C[+57.021]VYEALC[+57.021]N[+1702.581]TTSEC[+57.021]PPPVITR.I	HexNAc(2)Hex(8)Fuc(0)NeuAc(0)	C[+57]*3, N[+1703]	1357.55	3	4070.65	4069.66	1	-3.7	788	Specific	651.88	545.86	545.86	12.09	21	>sp|O15031|PLXB2_HUMAN Plexin-B2 OS=Homo sapiens GN=PLXNB2 PE=1 SV=3	13258	cacoP7gpep1.16886.16886.3	controllerType=0 controllerNumber=1 scan=16886	63.4689
19301:3	20	R.C[+57.021]VYEALC[+57.021]N[+1864.634]TTSEC[+57.021]PPPVITR.I	HexNAc(2)Hex(9)Fuc(0)NeuAc(0)	C[+57]*3, N[+1865]	1411.25	3	4231.73	4231.71	0	3.2	788	Specific	659.73	566.58	566.58	12.68	21	>sp|O15031|PLXB2_HUMAN Plexin-B2 OS=Homo sapiens GN=PLXNB2 PE=1 SV=3	13258	cacoP7gpep1.16856.16856.3	controllerType=0 controllerNumber=1 scan=16856	63.3224
19317:3	20	R.C[+57.021]VYEALC[+57.021]N[+1864.634]TTSEC[+57.021]PPPVITR.I	HexNAc(2)Hex(9)Fuc(0)NeuAc(0)	C[+57]*3, N[+1865]	1411.25	3	4231.73	4231.71	0	4.6	788	Specific	666.49	578.52	578.52	12.7	21	>sp|O15031|PLXB2_HUMAN Plexin-B2 OS=Homo sapiens GN=PLXNB2 PE=1 SV=3	13258	cacoP7gpep1.16869.16869.3	controllerType=0 controllerNumber=1 scan=16869	63.3841
19297:3	20	R.C[+57.021]VYEALC[+57.021]N[+1864.634]TTSEC[+57.021]PPPVITR.I	HexNAc(2)Hex(9)Fuc(0)NeuAc(0)	C[+57]*3, N[+1865]	1411.25	3	4231.73	4231.71	0	4.4	788	Specific	670.16	579.02	579.02	12.7	21	>sp|O15031|PLXB2_HUMAN Plexin-B2 OS=Homo sapiens GN=PLXNB2 PE=1 SV=3	13258	cacoP7gpep1.16849.16849.3	controllerType=0 controllerNumber=1 scan=16849	63.2942
03061:2	20	R.N[+1864.634]C[+57.021]SFQPER.Y	HexNAc(2)Hex(9)Fuc(0)NeuAc(0)	C[+57], N[+1865]	1451.55	2	2902.09	2902.08	0	3.1	844	Specific	375.94	293.88	293.88	6.3	21	>sp|O15031|PLXB2_HUMAN Plexin-B2 OS=Homo sapiens GN=PLXNB2 PE=1 SV=3	13258	cacoP7gpep1.4296.4296.2	controllerType=0 controllerNumber=1 scan=4296	15.8341
22568:4	20	R.EAESLQPMTVVGTDYVFHN[+2262.814]DTK.V	HexNAc(5)Hex(5)Fuc(1)NeuAc(1)	N[+2263]	1186.75	4	4743.99	4743.97	0	3.1	1031	Specific	143.89	126.42	25.09	4.6	21	>sp|O15031|PLXB2_HUMAN Plexin-B2 OS=Homo sapiens GN=PLXNB2 PE=1 SV=3	13258	cacoP7gpep1.20723.20723.4	controllerType=0 controllerNumber=1 scan=20723	80.1923
22574:4	20	R.EAESLQPMTVVGTDYVFHN[+2262.814]DTK.V	HexNAc(5)Hex(5)Fuc(1)NeuAc(1)	N[+2263]	1186.75	4	4743.99	4743.97	0	3.4	1031	Specific	191.35	137.89	21.42	4.49	21	>sp|O15031|PLXB2_HUMAN Plexin-B2 OS=Homo sapiens GN=PLXNB2 PE=1 SV=3	13258	cacoP7gpep1.20744.20744.4	controllerType=0 controllerNumber=1 scan=20744	80.2756
20857:3	20	R.EAESLQPMTVVGTDYVFHN[+1702.581]DTK.V	HexNAc(2)Hex(8)Fuc(0)NeuAc(0)	N[+1703]	1395.58	3	4184.74	4183.74	1	-1.1	1031	Specific	193.46	158.89	158.89	4.36	21	>sp|O15031|PLXB2_HUMAN Plexin-B2 OS=Homo sapiens GN=PLXNB2 PE=1 SV=3	13258	cacoP7gpep1.18340.18340.3	controllerType=0 controllerNumber=1 scan=18340	69.9964
20876:3	20	R.EAESLQPMTVVGTDYVFHN[+1540.529]DTK.V	HexNAc(2)Hex(7)Fuc(0)NeuAc(0)	N[+1541]	1341.24	3	4021.7	4021.69	0	2.5	1031	Specific	279.74	214.52	214.52	6.81	21	>sp|O15031|PLXB2_HUMAN Plexin-B2 OS=Homo sapiens GN=PLXNB2 PE=1 SV=3	13258	cacoP7gpep1.18370.18370.3	controllerType=0 controllerNumber=1 scan=18370	70.1151
20888:3	20	R.EAESLQPMTVVGTDYVFHN[+1540.529]DTK.V	HexNAc(2)Hex(7)Fuc(0)NeuAc(0)	N[+1541]	1341.24	3	4021.71	4021.69	0	5.7	1031	Specific	305.54	269.39	269.39	6.91	21	>sp|O15031|PLXB2_HUMAN Plexin-B2 OS=Homo sapiens GN=PLXNB2 PE=1 SV=3	13258	cacoP7gpep1.18381.18381.3	controllerType=0 controllerNumber=1 scan=18381	70.1651
20766:3	20	R.EAESLQPMTVVGTDYVFHN[+1864.634]DTK.V	HexNAc(2)Hex(9)Fuc(0)NeuAc(0)	N[+1865]	1449.27	3	4345.8	4345.79	0	2.2	1031	Specific	342.6	311.54	311.54	7.35	21	>sp|O15031|PLXB2_HUMAN Plexin-B2 OS=Homo sapiens GN=PLXNB2 PE=1 SV=3	13258	cacoP7gpep1.18246.18246.3	controllerType=0 controllerNumber=1 scan=18246	69.6021
20837:3	20	R.EAESLQPMTVVGTDYVFHN[+1702.581]DTK.V	HexNAc(2)Hex(8)Fuc(0)NeuAc(0)	N[+1703]	1395.26	3	4183.76	4183.74	0	3.6	1031	Specific	366.03	286.06	286.06	7.13	21	>sp|O15031|PLXB2_HUMAN Plexin-B2 OS=Homo sapiens GN=PLXNB2 PE=1 SV=3	13258	cacoP7gpep1.18320.18320.3	controllerType=0 controllerNumber=1 scan=18320	69.9142
20791:3	20	R.EAESLQPMTVVGTDYVFHN[+1864.634]DTK.V	HexNAc(2)Hex(9)Fuc(0)NeuAc(0)	N[+1865]	1449.28	3	4345.81	4345.79	0	4.4	1031	Specific	422.2	303.82	303.82	7.46	21	>sp|O15031|PLXB2_HUMAN Plexin-B2 OS=Homo sapiens GN=PLXNB2 PE=1 SV=3	13258	cacoP7gpep1.18273.18273.3	controllerType=0 controllerNumber=1 scan=18273	69.7136
12721:3	21	R.RFANEYPN[+2408.872]ITR.L	HexNAc(5)Hex(5)Fuc(2)NeuAc(1)	N[+2409]	1263.87	3	3789.61	3789.57	0	8.9	515	Specific	236.74	38.08	38.08	2	27	>sp|O75976|CBPD_HUMAN Carboxypeptidase D OS=Homo sapiens GN=CPD PE=1 SV=2	2257	cacoP7gpep1.11707.11707.3	controllerType=0 controllerNumber=1 scan=11707	38.1106
09372:3	21	R.RFANEYPN[+1864.634]ITR.L	HexNAc(2)Hex(9)Fuc(0)NeuAc(0)	N[+1865]	1082.45	3	3245.33	3245.34	0	-0.8	515	Specific	246.96	71.19	71.19	4.62	27	>sp|O75976|CBPD_HUMAN Carboxypeptidase D OS=Homo sapiens GN=CPD PE=1 SV=2	2257	cacoP7gpep1.9038.9038.3	controllerType=0 controllerNumber=1 scan=9038	28.7141
12959:3	21	R.RFANEYPN[+2262.814]ITR.L	HexNAc(5)Hex(5)Fuc(1)NeuAc(1)	N[+2263]	1215.18	3	3643.54	3643.52	0	6.2	515	Specific	332.76	143.71	143.71	5.77	27	>sp|O75976|CBPD_HUMAN Carboxypeptidase D OS=Homo sapiens GN=CPD PE=1 SV=2	2257	cacoP7gpep1.11882.11882.3	controllerType=0 controllerNumber=1 scan=11882	38.9059
20106:3	21	R.FANEYPN[+2553.910]ITR.L	HexNAc(5)Hex(5)Fuc(1)NeuAc(2)	N[+2554]	1260.18	3	3778.53	3778.51	0	4.1	516	Specific	213.34	85.58	85.58	2.79	27	>sp|O75976|CBPD_HUMAN Carboxypeptidase D OS=Homo sapiens GN=CPD PE=1 SV=2	2257	cacoP7gpep1.17559.17559.3	controllerType=0 controllerNumber=1 scan=17559	66.6737
15892:3	21	R.FANEYPN[+2554.930]ITR.L	HexNAc(5)Hex(5)Fuc(3)NeuAc(1)	N[+2555]	1260.52	3	3779.54	3779.53	0	2.2	516	Specific	237.39	102.42	102.42	5.01	27	>sp|O75976|CBPD_HUMAN Carboxypeptidase D OS=Homo sapiens GN=CPD PE=1 SV=2	2257	cacoP7gpep1.14157.14157.3	controllerType=0 controllerNumber=1 scan=14157	49.9999
19662:3	21	R.FANEYPN[+2553.910]ITR.L	HexNAc(5)Hex(5)Fuc(1)NeuAc(2)	N[+2554]	1260.18	3	3778.52	3778.51	0	1.7	516	Specific	352.05	141.35	141.35	5.58	27	>sp|O75976|CBPD_HUMAN Carboxypeptidase D OS=Homo sapiens GN=CPD PE=1 SV=2	2257	cacoP7gpep1.17171.17171.3	controllerType=0 controllerNumber=1 scan=17171	64.8056
15632:3	21	R.FANEYPN[+2407.852]ITR.L	HexNAc(5)Hex(5)Fuc(0)NeuAc(2)	N[+2408]	1211.5	3	3632.49	3632.45	0	9.2	516	Specific	391.6	226.79	226.79	5.35	27	>sp|O75976|CBPD_HUMAN Carboxypeptidase D OS=Homo sapiens GN=CPD PE=1 SV=2	2257	cacoP7gpep1.13962.13962.3	controllerType=0 controllerNumber=1 scan=13962	49.0305
19872:3	21	R.FANEYPN[+2553.910]ITR.L	HexNAc(5)Hex(5)Fuc(1)NeuAc(2)	N[+2554]	1260.18	3	3778.52	3778.51	0	2.7	516	Specific	404.7	206.12	206.12	5.97	27	>sp|O75976|CBPD_HUMAN Carboxypeptidase D OS=Homo sapiens GN=CPD PE=1 SV=2	2257	cacoP7gpep1.17350.17350.3	controllerType=0 controllerNumber=1 scan=17350	65.6951
15851:3	21	R.FANEYPN[+2262.814]ITR.L	HexNAc(5)Hex(5)Fuc(1)NeuAc(1)	N[+2263]	1163.15	3	3487.43	3487.42	0	3	516	Specific	470.37	176.64	176.64	6.13	27	>sp|O75976|CBPD_HUMAN Carboxypeptidase D OS=Homo sapiens GN=CPD PE=1 SV=2	2257	cacoP7gpep1.14127.14127.3	controllerType=0 controllerNumber=1 scan=14127	49.8488
05602:2	21	R.N[+1540.529]NSNNFDLNR.N	HexNAc(2)Hex(7)Fuc(0)NeuAc(0)	N[+1541]	1374.54	2	2748.08	2748.07	0	0.8	626	Specific	282.98	133.27	133.27	5.53	27	>sp|O75976|CBPD_HUMAN Carboxypeptidase D OS=Homo sapiens GN=CPD PE=1 SV=2	2257	cacoP7gpep1.6184.6184.2	controllerType=0 controllerNumber=1 scan=6184	21.0431
05853:2	21	R.N[+1378.476]NSNNFDLNR.N	HexNAc(2)Hex(6)Fuc(0)NeuAc(0)	N[+1378]	1293.52	2	2586.04	2586.02	0	7	626	Specific	326.72	145.69	145.69	5.61	27	>sp|O75976|CBPD_HUMAN Carboxypeptidase D OS=Homo sapiens GN=CPD PE=1 SV=2	2257	cacoP7gpep1.6362.6362.2	controllerType=0 controllerNumber=1 scan=6362	21.4838
09689:3	21	R.GKDLDTDFTNN[+1216.423]ASQPETK.A	HexNAc(2)Hex(5)Fuc(0)NeuAc(0)	N[+1216]	1066.46	3	3197.37	3197.34	0	9.8	1060	Specific	349.15	287.88	287.88	6.17	27	>sp|O75976|CBPD_HUMAN Carboxypeptidase D OS=Homo sapiens GN=CPD PE=1 SV=2	2257	cacoP7gpep1.9284.9284.3	controllerType=0 controllerNumber=1 scan=9284	29.4421
09891:3	21	R.GKDLDTDFTNN[+1930.692]ASQPETK.A	HexNAc(4)Hex(6)Fuc(1)NeuAc(0)	N[+1931]	1304.54	3	3911.61	3911.61	0	1.4	1060	Specific	353.59	243	243	6.73	27	>sp|O75976|CBPD_HUMAN Carboxypeptidase D OS=Homo sapiens GN=CPD PE=1 SV=2	2257	cacoP7gpep1.9434.9434.3	controllerType=0 controllerNumber=1 scan=9434	29.9705
09386:3	21	R.GKDLDTDFTNN[+1378.476]ASQPETK.A	HexNAc(2)Hex(6)Fuc(0)NeuAc(0)	N[+1378]	1120.47	3	3359.39	3359.39	0	0.9	1060	Specific	360.49	257.29	257.29	6.68	27	>sp|O75976|CBPD_HUMAN Carboxypeptidase D OS=Homo sapiens GN=CPD PE=1 SV=2	2257	cacoP7gpep1.9051.9051.3	controllerType=0 controllerNumber=1 scan=9051	28.7447
09735:3	21	R.GKDLDTDFTNN[+2116.756]ASQPETK.A	HexNAc(5)Hex(5)Fuc(0)NeuAc(1)	N[+2117]	1366.9	3	4098.68	4097.67	1	1.3	1060	Specific	368.99	209.99	26.49	6.77	27	>sp|O75976|CBPD_HUMAN Carboxypeptidase D OS=Homo sapiens GN=CPD PE=1 SV=2	2257	cacoP7gpep1.9320.9320.3	controllerType=0 controllerNumber=1 scan=9320	29.5599
10053:3	21	R.GKDLDTDFTNN[+1971.719]ASQPETK.A	HexNAc(5)Hex(5)Fuc(1)NeuAc(0)	N[+1972]	1318.23	3	3952.66	3952.63	0	7.8	1060	Specific	383.51	279.49	279.49	6.78	27	>sp|O75976|CBPD_HUMAN Carboxypeptidase D OS=Homo sapiens GN=CPD PE=1 SV=2	2257	cacoP7gpep1.9560.9560.3	controllerType=0 controllerNumber=1 scan=9560	30.3927
10085:3	21	R.GKDLDTDFTNN[+2117.777]ASQPETK.A	HexNAc(5)Hex(5)Fuc(2)NeuAc(0)	N[+2118]	1367.23	3	4099.68	4098.69	1	-3	1060	Specific	386.31	267.4	267.4	6.29	27	>sp|O75976|CBPD_HUMAN Carboxypeptidase D OS=Homo sapiens GN=CPD PE=1 SV=2	2257	cacoP7gpep1.9582.9582.3	controllerType=0 controllerNumber=1 scan=9582	30.4685
09401:3	21	R.GKDLDTDFTNN[+1378.476]ASQPETK.A	HexNAc(2)Hex(6)Fuc(0)NeuAc(0)	N[+1378]	1120.47	3	3359.41	3359.39	0	5.2	1060	Specific	410.34	346	346	7.24	27	>sp|O75976|CBPD_HUMAN Carboxypeptidase D OS=Homo sapiens GN=CPD PE=1 SV=2	2257	cacoP7gpep1.9061.9061.3	controllerType=0 controllerNumber=1 scan=9061	28.7705
10044:3	21	R.GKDLDTDFTNN[+1971.719]ASQPETK.A	HexNAc(5)Hex(5)Fuc(1)NeuAc(0)	N[+1972]	1318.22	3	3952.66	3952.63	0	6.5	1060	Specific	422.17	295.51	295.51	6.85	27	>sp|O75976|CBPD_HUMAN Carboxypeptidase D OS=Homo sapiens GN=CPD PE=1 SV=2	2257	cacoP7gpep1.9553.9553.3	controllerType=0 controllerNumber=1 scan=9553	30.3678
10121:3	21	R.GKDLDTDFTNN[+1971.719]ASQPETK.A	HexNAc(5)Hex(5)Fuc(1)NeuAc(0)	N[+1972]	1318.22	3	3952.64	3952.63	0	1	1060	Specific	505.99	366.06	366.06	7.72	27	>sp|O75976|CBPD_HUMAN Carboxypeptidase D OS=Homo sapiens GN=CPD PE=1 SV=2	2257	cacoP7gpep1.9612.9612.3	controllerType=0 controllerNumber=1 scan=9612	30.5619
09104:3	21	R.GKDLDTDFTNN[+1864.634]ASQPETK.A	HexNAc(2)Hex(9)Fuc(0)NeuAc(0)	N[+1865]	1282.53	3	3845.57	3845.55	0	6.4	1060	Specific	513.96	378.4	378.4	7.57	27	>sp|O75976|CBPD_HUMAN Carboxypeptidase D OS=Homo sapiens GN=CPD PE=1 SV=2	2257	cacoP7gpep1.8834.8834.3	controllerType=0 controllerNumber=1 scan=8834	28.1566
09259:3	21	R.GKDLDTDFTNN[+1540.529]ASQPETK.A	HexNAc(2)Hex(7)Fuc(0)NeuAc(0)	N[+1541]	1174.49	3	3521.45	3521.44	0	0.9	1060	Specific	536.62	420.36	420.36	9.14	27	>sp|O75976|CBPD_HUMAN Carboxypeptidase D OS=Homo sapiens GN=CPD PE=1 SV=2	2257	cacoP7gpep1.8954.8954.3	controllerType=0 controllerNumber=1 scan=8954	28.4863
09600:3	21	R.GKDLDTDFTNN[+1216.423]ASQPETK.A	HexNAc(2)Hex(5)Fuc(0)NeuAc(0)	N[+1216]	1066.45	3	3197.34	3197.34	0	0	1060	Specific	547.11	461.64	461.64	9.06	27	>sp|O75976|CBPD_HUMAN Carboxypeptidase D OS=Homo sapiens GN=CPD PE=1 SV=2	2257	cacoP7gpep1.9218.9218.3	controllerType=0 controllerNumber=1 scan=9218	29.2367
09129:3	21	R.GKDLDTDFTNN[+1702.581]ASQPETK.A	HexNAc(2)Hex(8)Fuc(0)NeuAc(0)	N[+1703]	1228.51	3	3683.51	3683.5	0	3.6	1060	Specific	555.34	392.08	392.08	9.28	27	>sp|O75976|CBPD_HUMAN Carboxypeptidase D OS=Homo sapiens GN=CPD PE=1 SV=2	2257	cacoP7gpep1.8853.8853.3	controllerType=0 controllerNumber=1 scan=8853	28.2077
09163:3	21	R.GKDLDTDFTNN[+1702.581]ASQPETK.A	HexNAc(2)Hex(8)Fuc(0)NeuAc(0)	N[+1703]	1228.51	3	3683.51	3683.5	0	3.1	1060	Specific	586.49	456.73	456.73	10.76	27	>sp|O75976|CBPD_HUMAN Carboxypeptidase D OS=Homo sapiens GN=CPD PE=1 SV=2	2257	cacoP7gpep1.8881.8881.3	controllerType=0 controllerNumber=1 scan=8881	28.2859
14830:3	21	K.DLDTDFTNN[+2117.777]ASQPETK.A	HexNAc(5)Hex(5)Fuc(2)NeuAc(0)	N[+2118]	1305.2	3	3913.59	3913.57	0	4.1	1062	Specific	202.89	127.49	127.49	4.21	27	>sp|O75976|CBPD_HUMAN Carboxypeptidase D OS=Homo sapiens GN=CPD PE=1 SV=2	2257	cacoP7gpep1.13337.13337.3	controllerType=0 controllerNumber=1 scan=13337	45.934
14597:3	21	K.DLDTDFTNN[+2117.777]ASQPETK.A	HexNAc(5)Hex(5)Fuc(2)NeuAc(0)	N[+2118]	1305.19	3	3913.57	3913.57	0	-2.1	1062	Specific	212.32	105.19	105.19	2.91	27	>sp|O75976|CBPD_HUMAN Carboxypeptidase D OS=Homo sapiens GN=CPD PE=1 SV=2	2257	cacoP7gpep1.13157.13157.3	controllerType=0 controllerNumber=1 scan=13157	45.0343
14822:3	21	K.DLDTDFTNN[+2117.777]ASQPETK.A	HexNAc(5)Hex(5)Fuc(2)NeuAc(0)	N[+2118]	1305.19	3	3913.57	3913.57	0	-2.5	1062	Specific	260.1	174.91	174.91	5.46	27	>sp|O75976|CBPD_HUMAN Carboxypeptidase D OS=Homo sapiens GN=CPD PE=1 SV=2	2257	cacoP7gpep1.13328.13328.3	controllerType=0 controllerNumber=1 scan=13328	45.8892
14826:3	21	K.DLDTDFTNN[+1971.719]ASQPETK.A	HexNAc(5)Hex(5)Fuc(1)NeuAc(0)	N[+1972]	1256.52	3	3767.54	3767.52	0	7	1062	Specific	406.39	305.52	305.52	6.58	27	>sp|O75976|CBPD_HUMAN Carboxypeptidase D OS=Homo sapiens GN=CPD PE=1 SV=2	2257	cacoP7gpep1.13333.13333.3	controllerType=0 controllerNumber=1 scan=13333	45.9123
06427:3	23	K.LN[+2076.750]LTTDPK.F	HexNAc(4)Hex(6)Fuc(2)NeuAc(0)	N[+2077]	993.419	3	2978.24	2978.25	0	-2.3	164	Specific	236.75	114.47	114.47	4.28	24	>sp|Q92896|GSLG1_HUMAN Golgi apparatus protein 1 OS=Homo sapiens GN=GLG1 PE=1 SV=2	7201	cacoP7gpep1.6771.6771.3	controllerType=0 controllerNumber=1 scan=6771	22.4852
06154:3	23	K.LN[+2238.803]LTTDPK.F	HexNAc(4)Hex(7)Fuc(2)NeuAc(0)	N[+2239]	1047.44	3	3140.31	3140.3	0	3.2	164	Specific	242.7	146.02	146.02	5.39	24	>sp|Q92896|GSLG1_HUMAN Golgi apparatus protein 1 OS=Homo sapiens GN=GLG1 PE=1 SV=2	7201	cacoP7gpep1.6580.6580.3	controllerType=0 controllerNumber=1 scan=6580	22.0188
12128:2	23	K.LN[+1540.529]LTTDPK.F	HexNAc(2)Hex(7)Fuc(0)NeuAc(0)	N[+1541]	1221.51	2	2442.01	2442.03	0	-5.9	164	Specific	319.16	194.37	194.37	4.69	24	>sp|Q92896|GSLG1_HUMAN Golgi apparatus protein 1 OS=Homo sapiens GN=GLG1 PE=1 SV=2	7201	cacoP7gpep1.11256.11256.2	controllerType=0 controllerNumber=1 scan=11256	36.2844
06756:2	23	K.LN[+1606.587]LTTDPK.F	HexNAc(4)Hex(4)Fuc(1)NeuAc(0)	N[+1607]	1254.55	2	2508.1	2508.09	0	6.2	164	Specific	444.72	248.22	248.22	6.12	24	>sp|Q92896|GSLG1_HUMAN Golgi apparatus protein 1 OS=Homo sapiens GN=GLG1 PE=1 SV=2	7201	cacoP7gpep1.7008.7008.2	controllerType=0 controllerNumber=1 scan=7008	23.0585
06728:2	23	K.LN[+1606.587]LTTDPK.F	HexNAc(4)Hex(4)Fuc(1)NeuAc(0)	N[+1607]	1254.55	2	2508.09	2508.09	0	3.7	164	Specific	445.11	292.61	292.61	6.45	24	>sp|Q92896|GSLG1_HUMAN Golgi apparatus protein 1 OS=Homo sapiens GN=GLG1 PE=1 SV=2	7201	cacoP7gpep1.6987.6987.2	controllerType=0 controllerNumber=1 scan=6987	23.0092
06269:2	23	K.LN[+1702.581]LTTDPK.F	HexNAc(2)Hex(8)Fuc(0)NeuAc(0)	N[+1703]	1302.55	2	2604.09	2604.08	0	3.8	164	Specific	457.39	330.1	330.1	6.64	24	>sp|Q92896|GSLG1_HUMAN Golgi apparatus protein 1 OS=Homo sapiens GN=GLG1 PE=1 SV=2	7201	cacoP7gpep1.6663.6663.2	controllerType=0 controllerNumber=1 scan=6663	22.2225
09563:4	23	R.GN[+2142.808]ITEYQC[+57.021]HQYITK.M	HexNAc(6)Hex(3)Fuc(3)NeuAc(0)	C[+57], N[+2143]	975.164	4	3897.63	3897.63	0	2.4	209	Specific	160.54	144.9	144.9	2.65	24	>sp|Q92896|GSLG1_HUMAN Golgi apparatus protein 1 OS=Homo sapiens GN=GLG1 PE=1 SV=2	7201	cacoP7gpep1.9189.9189.4	controllerType=0 controllerNumber=1 scan=9189	29.1478
10111:3	23	R.GN[+1606.587]ITEYQC[+57.021]HQYITK.M	HexNAc(4)Hex(4)Fuc(1)NeuAc(0)	C[+57], N[+1607]	1121.15	3	3361.42	3361.4	0	6	209	Specific	230.69	107.42	107.42	4.47	24	>sp|Q92896|GSLG1_HUMAN Golgi apparatus protein 1 OS=Homo sapiens GN=GLG1 PE=1 SV=2	7201	cacoP7gpep1.9603.9603.3	controllerType=0 controllerNumber=1 scan=9603	30.5354
10225:3	23	R.GN[+1850.693]ITEYQC[+57.021]HQYITK.M	HexNAc(6)Hex(3)Fuc(1)NeuAc(0)	C[+57], N[+1851]	1202.5	3	3605.5	3605.51	0	-3.8	209	Specific	232.31	105.21	105.21	4.7	24	>sp|Q92896|GSLG1_HUMAN Golgi apparatus protein 1 OS=Homo sapiens GN=GLG1 PE=1 SV=2	7201	cacoP7gpep1.9689.9689.3	controllerType=0 controllerNumber=1 scan=9689	30.7999
09693:3	23	R.GN[+2571.946]ITEYQC[+57.021]HQYITK.M	HexNAc(5)Hex(6)Fuc(4)NeuAc(0)	C[+57], N[+2572]	1442.93	3	4326.79	4326.76	0	5.9	209	Specific	268.52	78.49	78.49	4.92	24	>sp|Q92896|GSLG1_HUMAN Golgi apparatus protein 1 OS=Homo sapiens GN=GLG1 PE=1 SV=2	7201	cacoP7gpep1.9288.9288.3	controllerType=0 controllerNumber=1 scan=9288	29.453
13256:3	23	R.GN[+2076.750]ITEYQC[+57.021]HQYITK.M	HexNAc(4)Hex(6)Fuc(2)NeuAc(0)	C[+57], N[+2077]	1277.85	3	3831.54	3831.57	0	-8	209	Specific	273.3	138.53	138.53	4.36	24	>sp|Q92896|GSLG1_HUMAN Golgi apparatus protein 1 OS=Homo sapiens GN=GLG1 PE=1 SV=2	7201	cacoP7gpep1.12115.12115.3	controllerType=0 controllerNumber=1 scan=12115	39.953
13402:3	23	R.GN[+1930.692]ITEYQC[+57.021]HQYITK.M	HexNAc(4)Hex(6)Fuc(1)NeuAc(0)	C[+57], N[+1931]	1229.16	3	3685.47	3685.51	0	-9.9	209	Specific	315.07	182.65	182.65	4.9	24	>sp|Q92896|GSLG1_HUMAN Golgi apparatus protein 1 OS=Homo sapiens GN=GLG1 PE=1 SV=2	7201	cacoP7gpep1.12226.12226.3	controllerType=0 controllerNumber=1 scan=12226	40.4759
09783:3	23	R.GN[+1996.750]ITEYQC[+57.021]HQYITK.M	HexNAc(6)Hex(3)Fuc(2)NeuAc(0)	C[+57], N[+1997]	1251.19	3	3751.56	3751.57	0	-1.3	209	Specific	319.32	286.17	286.17	5.74	24	>sp|Q92896|GSLG1_HUMAN Golgi apparatus protein 1 OS=Homo sapiens GN=GLG1 PE=1 SV=2	7201	cacoP7gpep1.9354.9354.3	controllerType=0 controllerNumber=1 scan=9354	29.6818
12722:3	23	R.GN[+2246.819]ITEYQC[+57.021]HQYITK.M	HexNAc(5)Hex(4)Fuc(2)NeuAc(1)	C[+57], N[+2247]	1334.21	3	4000.63	4001.64	-1	-1.5	209	Specific	358.34	159.71	159.71	5.62	24	>sp|Q92896|GSLG1_HUMAN Golgi apparatus protein 1 OS=Homo sapiens GN=GLG1 PE=1 SV=2	7201	cacoP7gpep1.11708.11708.3	controllerType=0 controllerNumber=1 scan=11708	38.1164
09590:3	23	R.GN[+2101.782]ITEYQC[+57.021]HQYITK.M	HexNAc(5)Hex(4)Fuc(3)NeuAc(0)	C[+57], N[+2102]	1286.22	3	3856.63	3856.6	0	8.9	209	Specific	369.19	177.56	177.56	5.65	24	>sp|Q92896|GSLG1_HUMAN Golgi apparatus protein 1 OS=Homo sapiens GN=GLG1 PE=1 SV=2	7201	cacoP7gpep1.9211.9211.3	controllerType=0 controllerNumber=1 scan=9211	29.2154
09550:3	23	R.GN[+1864.634]ITEYQC[+57.021]HQYITK.M	HexNAc(2)Hex(9)Fuc(0)NeuAc(0)	C[+57], N[+1865]	1207.16	3	3619.46	3619.45	0	2.7	209	Specific	396.18	170.69	170.69	6.3	24	>sp|Q92896|GSLG1_HUMAN Golgi apparatus protein 1 OS=Homo sapiens GN=GLG1 PE=1 SV=2	7201	cacoP7gpep1.9178.9178.3	controllerType=0 controllerNumber=1 scan=9178	29.1106
10051:3	23	R.GN[+1590.592]ITEYQC[+57.021]HQYITK.M	HexNAc(4)Hex(3)Fuc(2)NeuAc(0)	C[+57], N[+1591]	1115.81	3	3345.42	3345.41	0	2.6	209	Specific	407.63	359.03	359.03	6.8	24	>sp|Q92896|GSLG1_HUMAN Golgi apparatus protein 1 OS=Homo sapiens GN=GLG1 PE=1 SV=2	7201	cacoP7gpep1.9559.9559.3	controllerType=0 controllerNumber=1 scan=9559	30.3889
12458:3	23	R.GN[+2392.877]ITEYQC[+57.021]HQYITK.M	HexNAc(5)Hex(4)Fuc(3)NeuAc(1)	C[+57], N[+2393]	1383.24	3	4147.71	4147.69	0	3.4	209	Specific	430.31	237.23	237.23	6.34	24	>sp|Q92896|GSLG1_HUMAN Golgi apparatus protein 1 OS=Homo sapiens GN=GLG1 PE=1 SV=2	7201	cacoP7gpep1.11501.11501.3	controllerType=0 controllerNumber=1 scan=11501	37.2392
12910:3	23	R.GN[+2076.750]ITEYQC[+57.021]HQYITK.M	HexNAc(4)Hex(6)Fuc(2)NeuAc(0)	C[+57], N[+2077]	1277.85	3	3831.54	3831.57	0	-6.5	209	Specific	456.15	242.33	242.33	5.26	24	>sp|Q92896|GSLG1_HUMAN Golgi apparatus protein 1 OS=Homo sapiens GN=GLG1 PE=1 SV=2	7201	cacoP7gpep1.11845.11845.3	controllerType=0 controllerNumber=1 scan=11845	38.7361
09860:3	23	R.GN[+1752.645]ITEYQC[+57.021]HQYITK.M	HexNAc(4)Hex(4)Fuc(2)NeuAc(0)	C[+57], N[+1753]	1169.83	3	3507.47	3507.46	0	3.6	209	Specific	458.91	262.82	262.82	6.56	24	>sp|Q92896|GSLG1_HUMAN Golgi apparatus protein 1 OS=Homo sapiens GN=GLG1 PE=1 SV=2	7201	cacoP7gpep1.9409.9409.3	controllerType=0 controllerNumber=1 scan=9409	29.8856
09503:3	23	R.GN[+2142.808]ITEYQC[+57.021]HQYITK.M	HexNAc(6)Hex(3)Fuc(3)NeuAc(0)	C[+57], N[+2143]	1299.89	3	3897.66	3897.63	0	7.8	209	Specific	467.21	458.72	458.72	8.27	24	>sp|Q92896|GSLG1_HUMAN Golgi apparatus protein 1 OS=Homo sapiens GN=GLG1 PE=1 SV=2	7201	cacoP7gpep1.9142.9142.3	controllerType=0 controllerNumber=1 scan=9142	28.9895
09510:3	23	R.GN[+1702.581]ITEYQC[+57.021]HQYITK.M	HexNAc(2)Hex(8)Fuc(0)NeuAc(0)	C[+57], N[+1703]	1153.14	3	3457.39	3457.4	0	-1.4	209	Specific	504.4	424.94	424.94	8.11	24	>sp|Q92896|GSLG1_HUMAN Golgi apparatus protein 1 OS=Homo sapiens GN=GLG1 PE=1 SV=2	7201	cacoP7gpep1.9146.9146.3	controllerType=0 controllerNumber=1 scan=9146	29.0048
09504:3	23	R.GN[+1864.634]ITEYQC[+57.021]HQYITK.M	HexNAc(2)Hex(9)Fuc(0)NeuAc(0)	C[+57], N[+1865]	1207.16	3	3619.45	3619.45	0	0.7	209	Specific	548.68	270.32	270.32	6.9	24	>sp|Q92896|GSLG1_HUMAN Golgi apparatus protein 1 OS=Homo sapiens GN=GLG1 PE=1 SV=2	7201	cacoP7gpep1.9143.9143.3	controllerType=0 controllerNumber=1 scan=9143	28.9953
12556:3	23	R.GN[+2392.877]ITEYQC[+57.021]HQYITK.M	HexNAc(5)Hex(4)Fuc(3)NeuAc(1)	C[+57], N[+2393]	1383.24	3	4147.7	4147.69	0	1.1	209	Specific	550.32	296.6	296.6	6.93	24	>sp|Q92896|GSLG1_HUMAN Golgi apparatus protein 1 OS=Homo sapiens GN=GLG1 PE=1 SV=2	7201	cacoP7gpep1.11573.11573.3	controllerType=0 controllerNumber=1 scan=11573	37.5497
19557:3	24	R.C[+57.021]LYGEAYPAC[+57.021]SPGN[+1378.476]TSTAEEELC[+57.021]R.L	HexNAc(2)Hex(6)Fuc(0)NeuAc(0)	C[+57]*3, N[+1378]	1371.88	3	4113.62	4113.61	0	1.9	733	Specific	549.81	414.88	414.88	9.38	6	>sp|O76024|WFS1_HUMAN Wolframin OS=Homo sapiens GN=WFS1 PE=1 SV=2	19080	cacoP7gpep1.17076.17076.3	controllerType=0 controllerNumber=1 scan=17076	64.3572
19452:3	24	R.C[+57.021]LYGEAYPAC[+57.021]SPGN[+1540.529]TSTAEEELC[+57.021]R.L	HexNAc(2)Hex(7)Fuc(0)NeuAc(0)	C[+57]*3, N[+1541]	1425.9	3	4275.68	4275.67	0	3.2	733	Specific	648.11	553.68	553.68	11.72	6	>sp|O76024|WFS1_HUMAN Wolframin OS=Homo sapiens GN=WFS1 PE=1 SV=2	19080	cacoP7gpep1.16983.16983.3	controllerType=0 controllerNumber=1 scan=16983	63.9296
19411:3	24	R.C[+57.021]LYGEAYPAC[+57.021]SPGN[+1702.581]TSTAEEELC[+57.021]R.L	HexNAc(2)Hex(8)Fuc(0)NeuAc(0)	C[+57]*3, N[+1703]	1479.92	3	4437.75	4437.72	0	6.2	733	Specific	692.09	599.3	599.3	12.53	6	>sp|O76024|WFS1_HUMAN Wolframin OS=Homo sapiens GN=WFS1 PE=1 SV=2	19080	cacoP7gpep1.16952.16952.3	controllerType=0 controllerNumber=1 scan=16952	63.7844
19499:3	24	R.C[+57.021]LYGEAYPAC[+57.021]SPGN[+1378.476]TSTAEEELC[+57.021]R.L	HexNAc(2)Hex(6)Fuc(0)NeuAc(0)	C[+57]*3, N[+1378]	1371.88	3	4113.63	4113.61	0	3.8	733	Specific	859.7	673.44	673.44	16.72	6	>sp|O76024|WFS1_HUMAN Wolframin OS=Homo sapiens GN=WFS1 PE=1 SV=2	19080	cacoP7gpep1.17019.17019.3	controllerType=0 controllerNumber=1 scan=17019	64.0981
19659:3	25	R.IVDVN[+2715.963]LTSEGK.V	HexNAc(5)Hex(6)Fuc(1)NeuAc(2)	N[+2716]	1297.55	3	3890.62	3890.59	0	7.6	170	Specific	149.88	74.09	74.09	2.42	36	>sp|Q9HD45|TM9S3_HUMAN Transmembrane 9 superfamily member 3 OS=Homo sapiens GN=TM9SF3 PE=1 SV=2	17711	cacoP7gpep1.17168.17168.3	controllerType=0 controllerNumber=1 scan=17168	64.7938
15245:3	25	R.IVDVN[+2863.041]LTSEGK.V	HexNAc(5)Hex(6)Fuc(4)NeuAc(1)	N[+2863]	1346.57	3	4037.7	4037.67	0	6.6	170	Specific	162.67	90.1	90.1	2.58	36	>sp|Q9HD45|TM9S3_HUMAN Transmembrane 9 superfamily member 3 OS=Homo sapiens GN=TM9SF3 PE=1 SV=2	17711	cacoP7gpep1.13664.13664.3	controllerType=0 controllerNumber=1 scan=13664	47.5477
20268:3	25	R.IVDVN[+2204.772]LTSEGK.V	HexNAc(4)Hex(5)Fuc(0)NeuAc(2)	N[+2205]	1127.14	3	3379.42	3379.4	0	3.4	170	Specific	165.14	102.29	102.29	2.9	36	>sp|Q9HD45|TM9S3_HUMAN Transmembrane 9 superfamily member 3 OS=Homo sapiens GN=TM9SF3 PE=1 SV=2	17711	cacoP7gpep1.17702.17702.3	controllerType=0 controllerNumber=1 scan=17702	67.314
11587:3	25	R.IVDVN[+2117.777]LTSEGK.V	HexNAc(5)Hex(5)Fuc(2)NeuAc(0)	N[+2118]	1098.15	3	3292.43	3292.41	0	6	170	Specific	179.78	76.14	76.14	2.53	36	>sp|Q9HD45|TM9S3_HUMAN Transmembrane 9 superfamily member 3 OS=Homo sapiens GN=TM9SF3 PE=1 SV=2	17711	cacoP7gpep1.10850.10850.3	controllerType=0 controllerNumber=1 scan=10850	34.6759
19967:3	25	R.IVDVN[+2553.910]LTSEGK.V	HexNAc(5)Hex(5)Fuc(1)NeuAc(2)	N[+2554]	1243.52	3	3728.55	3728.54	0	1.3	170	Specific	183.93	75.24	75.24	2.61	36	>sp|Q9HD45|TM9S3_HUMAN Transmembrane 9 superfamily member 3 OS=Homo sapiens GN=TM9SF3 PE=1 SV=2	17711	cacoP7gpep1.17432.17432.3	controllerType=0 controllerNumber=1 scan=17432	66.0844
11802:3	25	R.IVDVN[+1930.692]LTSEGK.V	HexNAc(4)Hex(6)Fuc(1)NeuAc(0)	N[+1931]	1035.79	3	3105.34	3105.32	0	5.9	170	Specific	236.74	143.09	143.09	3.67	36	>sp|Q9HD45|TM9S3_HUMAN Transmembrane 9 superfamily member 3 OS=Homo sapiens GN=TM9SF3 PE=1 SV=2	17711	cacoP7gpep1.11005.11005.3	controllerType=0 controllerNumber=1 scan=11005	35.25
11488:3	25	R.IVDVN[+2409.893]LTSEGK.V	HexNAc(5)Hex(5)Fuc(4)NeuAc(0)	N[+2410]	1195.51	3	3584.53	3584.52	0	1.2	170	Specific	239.97	139.03	139.03	5.15	36	>sp|Q9HD45|TM9S3_HUMAN Transmembrane 9 superfamily member 3 OS=Homo sapiens GN=TM9SF3 PE=1 SV=2	17711	cacoP7gpep1.10775.10775.3	controllerType=0 controllerNumber=1 scan=10775	34.4075
15179:3	25	R.IVDVN[+2571.946]LTSEGK.V	HexNAc(5)Hex(6)Fuc(4)NeuAc(0)	N[+2572]	1249.53	3	3746.56	3746.58	0	-3.5	170	Specific	247.16	132.88	132.88	4.65	36	>sp|Q9HD45|TM9S3_HUMAN Transmembrane 9 superfamily member 3 OS=Homo sapiens GN=TM9SF3 PE=1 SV=2	17711	cacoP7gpep1.13610.13610.3	controllerType=0 controllerNumber=1 scan=13610	47.2799
11500:3	25	R.IVDVN[+2409.893]LTSEGK.V	HexNAc(5)Hex(5)Fuc(4)NeuAc(0)	N[+2410]	1195.51	3	3584.52	3584.52	0	-1.1	170	Specific	253.2	162.33	162.33	5.04	36	>sp|Q9HD45|TM9S3_HUMAN Transmembrane 9 superfamily member 3 OS=Homo sapiens GN=TM9SF3 PE=1 SV=2	17711	cacoP7gpep1.10785.10785.3	controllerType=0 controllerNumber=1 scan=10785	34.4412
15864:3	25	R.IVDVN[+2262.814]LTSEGK.V	HexNAc(5)Hex(5)Fuc(1)NeuAc(1)	N[+2263]	1146.49	3	3437.46	3437.45	0	3.3	170	Specific	253.52	141.38	141.38	5.28	36	>sp|Q9HD45|TM9S3_HUMAN Transmembrane 9 superfamily member 3 OS=Homo sapiens GN=TM9SF3 PE=1 SV=2	17711	cacoP7gpep1.14137.14137.3	controllerType=0 controllerNumber=1 scan=14137	49.8992
20192:3	25	R.IVDVN[+2407.852]LTSEGK.V	HexNAc(5)Hex(5)Fuc(0)NeuAc(2)	N[+2408]	1194.84	3	3582.49	3582.48	0	2.5	170	Specific	256.3	78.86	78.86	4.71	36	>sp|Q9HD45|TM9S3_HUMAN Transmembrane 9 superfamily member 3 OS=Homo sapiens GN=TM9SF3 PE=1 SV=2	17711	cacoP7gpep1.17631.17631.3	controllerType=0 controllerNumber=1 scan=17631	66.9989
11450:3	25	R.IVDVN[+2571.946]LTSEGK.V	HexNAc(5)Hex(6)Fuc(4)NeuAc(0)	N[+2572]	1249.53	3	3746.59	3746.58	0	3.3	170	Specific	285.17	171.58	171.58	5.55	36	>sp|Q9HD45|TM9S3_HUMAN Transmembrane 9 superfamily member 3 OS=Homo sapiens GN=TM9SF3 PE=1 SV=2	17711	cacoP7gpep1.10743.10743.3	controllerType=0 controllerNumber=1 scan=10743	34.2884
11474:3	25	R.IVDVN[+2571.946]LTSEGK.V	HexNAc(5)Hex(6)Fuc(4)NeuAc(0)	N[+2572]	1249.53	3	3746.56	3746.58	0	-3.3	170	Specific	288.96	204.37	204.37	5.04	36	>sp|Q9HD45|TM9S3_HUMAN Transmembrane 9 superfamily member 3 OS=Homo sapiens GN=TM9SF3 PE=1 SV=2	17711	cacoP7gpep1.10764.10764.3	controllerType=0 controllerNumber=1 scan=10764	34.365
19700:3	25	R.IVDVN[+2496.888]LTSEGK.V	HexNAc(4)Hex(5)Fuc(2)NeuAc(2)	N[+2497]	1224.51	3	3671.52	3671.52	0	1.3	170	Specific	291.26	99.98	99.98	4.91	36	>sp|Q9HD45|TM9S3_HUMAN Transmembrane 9 superfamily member 3 OS=Homo sapiens GN=TM9SF3 PE=1 SV=2	17711	cacoP7gpep1.17206.17206.3	controllerType=0 controllerNumber=1 scan=17206	64.9842
15234:3	25	R.IVDVN[+2351.851]LTSEGK.V	HexNAc(4)Hex(5)Fuc(3)NeuAc(1)	N[+2352]	1176.17	3	3526.5	3526.48	0	5	170	Specific	294.38	198.35	198.35	5.62	36	>sp|Q9HD45|TM9S3_HUMAN Transmembrane 9 superfamily member 3 OS=Homo sapiens GN=TM9SF3 PE=1 SV=2	17711	cacoP7gpep1.13653.13653.3	controllerType=0 controllerNumber=1 scan=13653	47.4916
11769:3	25	R.IVDVN[+1565.560]LTSEGK.V	HexNAc(3)Hex(5)Fuc(1)NeuAc(0)	N[+1566]	914.07	3	2740.2	2740.19	0	1.3	170	Specific	306.27	107.86	107.86	4.3	36	>sp|Q9HD45|TM9S3_HUMAN Transmembrane 9 superfamily member 3 OS=Homo sapiens GN=TM9SF3 PE=1 SV=2	17711	cacoP7gpep1.10982.10982.3	controllerType=0 controllerNumber=1 scan=10982	35.1615
15236:3	25	R.IVDVN[+2205.793]LTSEGK.V	HexNAc(4)Hex(5)Fuc(2)NeuAc(1)	N[+2206]	1127.48	3	3380.44	3380.42	0	3.7	170	Specific	314.72	182.49	182.49	5.63	36	>sp|Q9HD45|TM9S3_HUMAN Transmembrane 9 superfamily member 3 OS=Homo sapiens GN=TM9SF3 PE=1 SV=2	17711	cacoP7gpep1.13655.13655.3	controllerType=0 controllerNumber=1 scan=13655	47.5029
19839:3	25	R.IVDVN[+2715.963]LTSEGK.V	HexNAc(5)Hex(6)Fuc(1)NeuAc(2)	N[+2716]	1297.53	3	3890.59	3890.59	0	-1.4	170	Specific	322.64	225.55	225.55	5.35	36	>sp|Q9HD45|TM9S3_HUMAN Transmembrane 9 superfamily member 3 OS=Homo sapiens GN=TM9SF3 PE=1 SV=2	17711	cacoP7gpep1.17319.17319.3	controllerType=0 controllerNumber=1 scan=17319	65.5426
19735:3	25	R.IVDVN[+2350.830]LTSEGK.V	HexNAc(4)Hex(5)Fuc(1)NeuAc(2)	N[+2351]	1175.83	3	3525.48	3525.46	0	6.5	170	Specific	328.48	170.01	170.01	5.55	36	>sp|Q9HD45|TM9S3_HUMAN Transmembrane 9 superfamily member 3 OS=Homo sapiens GN=TM9SF3 PE=1 SV=2	17711	cacoP7gpep1.17237.17237.3	controllerType=0 controllerNumber=1 scan=17237	65.136
19909:3	25	R.IVDVN[+2407.852]LTSEGK.V	HexNAc(5)Hex(5)Fuc(0)NeuAc(2)	N[+2408]	1194.84	3	3582.5	3582.48	0	4.2	170	Specific	331.16	211.71	211.71	5.83	36	>sp|Q9HD45|TM9S3_HUMAN Transmembrane 9 superfamily member 3 OS=Homo sapiens GN=TM9SF3 PE=1 SV=2	17711	cacoP7gpep1.17383.17383.3	controllerType=0 controllerNumber=1 scan=17383	65.848
11656:3	25	R.IVDVN[+1727.613]LTSEGK.V	HexNAc(3)Hex(6)Fuc(1)NeuAc(0)	N[+1728]	968.09	3	2902.26	2902.24	0	3.8	170	Specific	340.66	210.68	210.68	5.8	36	>sp|Q9HD45|TM9S3_HUMAN Transmembrane 9 superfamily member 3 OS=Homo sapiens GN=TM9SF3 PE=1 SV=2	17711	cacoP7gpep1.10901.10901.3	controllerType=0 controllerNumber=1 scan=10901	34.853
11747:3	25	R.IVDVN[+1768.640]LTSEGK.V	HexNAc(4)Hex(5)Fuc(1)NeuAc(0)	N[+1769]	981.762	3	2943.27	2943.27	0	0.4	170	Specific	356.18	204.8	204.8	5.76	36	>sp|Q9HD45|TM9S3_HUMAN Transmembrane 9 superfamily member 3 OS=Homo sapiens GN=TM9SF3 PE=1 SV=2	17711	cacoP7gpep1.10968.10968.3	controllerType=0 controllerNumber=1 scan=10968	35.1086
15423:3	25	R.IVDVN[+2716.983]LTSEGK.V	HexNAc(5)Hex(6)Fuc(3)NeuAc(1)	N[+2717]	1297.89	3	3891.64	3891.61	0	6.8	170	Specific	368.53	231.85	231.85	5.59	36	>sp|Q9HD45|TM9S3_HUMAN Transmembrane 9 superfamily member 3 OS=Homo sapiens GN=TM9SF3 PE=1 SV=2	17711	cacoP7gpep1.13808.13808.3	controllerType=0 controllerNumber=1 scan=13808	48.2607
11889:3	25	R.IVDVN[+1971.719]LTSEGK.V	HexNAc(5)Hex(5)Fuc(1)NeuAc(0)	N[+1972]	1049.46	3	3146.37	3146.35	0	4.8	170	Specific	378.18	244.24	244.24	5.83	36	>sp|Q9HD45|TM9S3_HUMAN Transmembrane 9 superfamily member 3 OS=Homo sapiens GN=TM9SF3 PE=1 SV=2	17711	cacoP7gpep1.11070.11070.3	controllerType=0 controllerNumber=1 scan=11070	35.5019
19929:3	25	R.IVDVN[+2350.830]LTSEGK.V	HexNAc(4)Hex(5)Fuc(1)NeuAc(2)	N[+2351]	1175.83	3	3525.48	3525.46	0	4.9	170	Specific	396.72	228.24	228.24	5.85	36	>sp|Q9HD45|TM9S3_HUMAN Transmembrane 9 superfamily member 3 OS=Homo sapiens GN=TM9SF3 PE=1 SV=2	17711	cacoP7gpep1.17401.17401.3	controllerType=0 controllerNumber=1 scan=17401	65.9293
11467:3	25	R.IVDVN[+1914.697]LTSEGK.V	HexNAc(4)Hex(5)Fuc(2)NeuAc(0)	N[+1915]	1030.45	3	3089.34	3089.33	0	2	170	Specific	399.99	261.08	261.08	6	36	>sp|Q9HD45|TM9S3_HUMAN Transmembrane 9 superfamily member 3 OS=Homo sapiens GN=TM9SF3 PE=1 SV=2	17711	cacoP7gpep1.10759.10759.3	controllerType=0 controllerNumber=1 scan=10759	34.3463
15289:3	25	R.IVDVN[+2408.872]LTSEGK.V	HexNAc(5)Hex(5)Fuc(2)NeuAc(1)	N[+2409]	1195.18	3	3583.52	3583.5	0	3.4	170	Specific	401.52	223	223	5.81	36	>sp|Q9HD45|TM9S3_HUMAN Transmembrane 9 superfamily member 3 OS=Homo sapiens GN=TM9SF3 PE=1 SV=2	17711	cacoP7gpep1.13698.13698.3	controllerType=0 controllerNumber=1 scan=13698	47.7163
11551:3	25	R.IVDVN[+2425.887]LTSEGK.V	HexNAc(5)Hex(6)Fuc(3)NeuAc(0)	N[+2426]	1200.85	3	3600.55	3600.52	0	7.5	170	Specific	418.03	275.67	275.67	5.84	36	>sp|Q9HD45|TM9S3_HUMAN Transmembrane 9 superfamily member 3 OS=Homo sapiens GN=TM9SF3 PE=1 SV=2	17711	cacoP7gpep1.10823.10823.3	controllerType=0 controllerNumber=1 scan=10823	34.5769
15483:3	25	R.IVDVN[+2262.814]LTSEGK.V	HexNAc(5)Hex(5)Fuc(1)NeuAc(1)	N[+2263]	1146.49	3	3437.46	3437.45	0	5.2	170	Specific	428.36	261.8	261.8	6.06	36	>sp|Q9HD45|TM9S3_HUMAN Transmembrane 9 superfamily member 3 OS=Homo sapiens GN=TM9SF3 PE=1 SV=2	17711	cacoP7gpep1.13852.13852.3	controllerType=0 controllerNumber=1 scan=13852	48.481
11475:3	25	R.IVDVN[+2263.835]LTSEGK.V	HexNAc(5)Hex(5)Fuc(3)NeuAc(0)	N[+2264]	1146.83	3	3438.48	3438.47	0	3.5	170	Specific	438.48	290.73	290.73	6.12	36	>sp|Q9HD45|TM9S3_HUMAN Transmembrane 9 superfamily member 3 OS=Homo sapiens GN=TM9SF3 PE=1 SV=2	17711	cacoP7gpep1.10765.10765.3	controllerType=0 controllerNumber=1 scan=10765	34.3705
11540:2	25	R.IVDVN[+1914.697]LTSEGK.V	HexNAc(4)Hex(5)Fuc(2)NeuAc(0)	N[+1915]	1545.17	2	3089.34	3089.33	0	4.1	170	Specific	505.62	406.89	406.89	8.39	36	>sp|Q9HD45|TM9S3_HUMAN Transmembrane 9 superfamily member 3 OS=Homo sapiens GN=TM9SF3 PE=1 SV=2	17711	cacoP7gpep1.10814.10814.2	controllerType=0 controllerNumber=1 scan=10814	34.5443
11521:2	25	R.IVDVN[+1914.697]LTSEGK.V	HexNAc(4)Hex(5)Fuc(2)NeuAc(0)	N[+1915]	1545.18	2	3089.35	3089.33	0	7.8	170	Specific	508.08	393.86	393.86	8.28	36	>sp|Q9HD45|TM9S3_HUMAN Transmembrane 9 superfamily member 3 OS=Homo sapiens GN=TM9SF3 PE=1 SV=2	17711	cacoP7gpep1.10799.10799.2	controllerType=0 controllerNumber=1 scan=10799	34.494
11514:2	25	R.IVDVN[+1914.697]LTSEGK.V	HexNAc(4)Hex(5)Fuc(2)NeuAc(0)	N[+1915]	1545.17	2	3089.33	3089.33	0	-0.3	170	Specific	510.86	394.8	394.8	8.17	36	>sp|Q9HD45|TM9S3_HUMAN Transmembrane 9 superfamily member 3 OS=Homo sapiens GN=TM9SF3 PE=1 SV=2	17711	cacoP7gpep1.10793.10793.2	controllerType=0 controllerNumber=1 scan=10793	34.4737
15246:3	25	R.IVDVN[+2554.930]LTSEGK.V	HexNAc(5)Hex(5)Fuc(3)NeuAc(1)	N[+2555]	1243.87	3	3729.59	3729.56	0	6.3	170	Specific	515.12	278.75	278.75	6.15	36	>sp|Q9HD45|TM9S3_HUMAN Transmembrane 9 superfamily member 3 OS=Homo sapiens GN=TM9SF3 PE=1 SV=2	17711	cacoP7gpep1.13665.13665.3	controllerType=0 controllerNumber=1 scan=13665	47.5531
15455:3	25	R.IVDVN[+2408.872]LTSEGK.V	HexNAc(5)Hex(5)Fuc(2)NeuAc(1)	N[+2409]	1195.18	3	3583.52	3583.5	0	3.3	170	Specific	555.18	369.64	369.64	7.06	36	>sp|Q9HD45|TM9S3_HUMAN Transmembrane 9 superfamily member 3 OS=Homo sapiens GN=TM9SF3 PE=1 SV=2	17711	cacoP7gpep1.13830.13830.3	controllerType=0 controllerNumber=1 scan=13830	48.3707
11800:2	25	R.IVDVN[+1565.560]LTSEGK.V	HexNAc(3)Hex(5)Fuc(1)NeuAc(0)	N[+1566]	1370.61	2	2740.2	2740.19	0	4.3	170	Specific	581.54	437.04	437.04	10	36	>sp|Q9HD45|TM9S3_HUMAN Transmembrane 9 superfamily member 3 OS=Homo sapiens GN=TM9SF3 PE=1 SV=2	17711	cacoP7gpep1.11003.11003.2	controllerType=0 controllerNumber=1 scan=11003	35.2413
11665:2	25	R.IVDVN[+1727.613]LTSEGK.V	HexNAc(3)Hex(6)Fuc(1)NeuAc(0)	N[+1728]	1451.63	2	2902.25	2902.24	0	2.1	170	Specific	629.83	391.41	391.41	11.01	36	>sp|Q9HD45|TM9S3_HUMAN Transmembrane 9 superfamily member 3 OS=Homo sapiens GN=TM9SF3 PE=1 SV=2	17711	cacoP7gpep1.10906.10906.2	controllerType=0 controllerNumber=1 scan=10906	34.8737
11742:3	26	R.N[+2976.063]ISFMVK.R	HexNAc(7)Hex(6)Fuc(0)NeuAc(2)	N[+2976]	1272.18	3	3814.54	3814.51	0	6.4	267	Specific	222.02	46.53	46.53	2.49	10	>sp|O14672|ADA10_HUMAN Disintegrin and metalloproteinase domain-containing protein 10 OS=Homo sapiens GN=ADAM10 PE=1 SV=1	421	cacoP7gpep1.10963.10963.3	controllerType=0 controllerNumber=1 scan=10963	35.0954
13087:4	26	R.IRIN[+1864.634]TTADEKDPTNPFR.F	HexNAc(2)Hex(9)Fuc(0)NeuAc(0)	N[+1865]	963.92	4	3852.66	3852.65	0	1.2	275	Specific	367.73	245.74	245.74	6.43	10	>sp|O14672|ADA10_HUMAN Disintegrin and metalloproteinase domain-containing protein 10 OS=Homo sapiens GN=ADAM10 PE=1 SV=1	421	cacoP7gpep1.11982.11982.4	controllerType=0 controllerNumber=1 scan=11982	39.3766
17101:4	26	R.IN[+2204.772]TTADEKDPTNPFR.F	HexNAc(4)Hex(5)Fuc(0)NeuAc(2)	N[+2205]	981.654	4	3923.59	3923.61	0	-3.6	277	Specific	179.46	141.7	141.7	2.82	10	>sp|O14672|ADA10_HUMAN Disintegrin and metalloproteinase domain-containing protein 10 OS=Homo sapiens GN=ADAM10 PE=1 SV=1	421	cacoP7gpep1.15070.15070.4	controllerType=0 controllerNumber=1 scan=15070	54.5692
11787:3	26	R.IN[+1864.634]TTADEKDPTNPFR.F	HexNAc(2)Hex(9)Fuc(0)NeuAc(0)	N[+1865]	1195.16	3	3583.47	3583.47	0	-0.9	277	Specific	557.61	334.6	334.6	6.75	10	>sp|O14672|ADA10_HUMAN Disintegrin and metalloproteinase domain-containing protein 10 OS=Homo sapiens GN=ADAM10 PE=1 SV=1	421	cacoP7gpep1.10995.10995.3	controllerType=0 controllerNumber=1 scan=10995	35.2088
11673:3	26	R.IN[+1702.581]TTADEKDPTNPFR.F	HexNAc(2)Hex(8)Fuc(0)NeuAc(0)	N[+1703]	1141.15	3	3421.42	3421.42	0	2.4	277	Specific	749.48	519.17	519.17	13.25	10	>sp|O14672|ADA10_HUMAN Disintegrin and metalloproteinase domain-containing protein 10 OS=Homo sapiens GN=ADAM10 PE=1 SV=1	421	cacoP7gpep1.10913.10913.3	controllerType=0 controllerNumber=1 scan=10913	34.8982
11544:3	26	R.IN[+1864.634]TTADEKDPTNPFR.F	HexNAc(2)Hex(9)Fuc(0)NeuAc(0)	N[+1865]	1195.17	3	3583.48	3583.47	0	3.5	277	Specific	791.27	533.44	533.44	14.13	10	>sp|O14672|ADA10_HUMAN Disintegrin and metalloproteinase domain-containing protein 10 OS=Homo sapiens GN=ADAM10 PE=1 SV=1	421	cacoP7gpep1.10819.10819.3	controllerType=0 controllerNumber=1 scan=10819	34.5669
19269:4	26	R.IN[+1864.634]TTADEKDPTNPFRFPNIGVEK.F	HexNAc(2)Hex(9)Fuc(0)NeuAc(0)	N[+1865]	1117.75	4	4467.97	4467.94	0	6.6	277	Specific	565.91	429.17	429.17	9.23	10	>sp|O14672|ADA10_HUMAN Disintegrin and metalloproteinase domain-containing protein 10 OS=Homo sapiens GN=ADAM10 PE=1 SV=1	421	cacoP7gpep1.16813.16813.4	controllerType=0 controllerNumber=1 scan=16813	63.1467
08432:2	26	R.N[+1378.476]ISQVLEK.K	HexNAc(2)Hex(6)Fuc(0)NeuAc(0)	N[+1378]	1155.01	2	2309.02	2309	0	8.9	439	Specific	342.08	115.04	115.04	5.04	10	>sp|O14672|ADA10_HUMAN Disintegrin and metalloproteinase domain-containing protein 10 OS=Homo sapiens GN=ADAM10 PE=1 SV=1	421	cacoP7gpep1.8320.8320.2	controllerType=0 controllerNumber=1 scan=8320	26.7145
08396:2	26	R.N[+1378.476]ISQVLEK.K	HexNAc(2)Hex(6)Fuc(0)NeuAc(0)	N[+1378]	1155	2	2309	2309	0	0.6	439	Specific	491.48	216.42	216.42	6.42	10	>sp|O14672|ADA10_HUMAN Disintegrin and metalloproteinase domain-containing protein 10 OS=Homo sapiens GN=ADAM10 PE=1 SV=1	421	cacoP7gpep1.8292.8292.2	controllerType=0 controllerNumber=1 scan=8292	26.6249
07874:2	26	R.N[+1864.634]ISQVLEK.K	HexNAc(2)Hex(9)Fuc(0)NeuAc(0)	N[+1865]	1398.09	2	2795.18	2795.16	0	5.9	439	Specific	541.94	255.61	255.61	6.66	10	>sp|O14672|ADA10_HUMAN Disintegrin and metalloproteinase domain-containing protein 10 OS=Homo sapiens GN=ADAM10 PE=1 SV=1	421	cacoP7gpep1.7892.7892.2	controllerType=0 controllerNumber=1 scan=7892	25.4381
07864:2	26	R.N[+1864.634]ISQVLEK.K	HexNAc(2)Hex(9)Fuc(0)NeuAc(0)	N[+1865]	1398.1	2	2795.19	2795.16	0	9.7	439	Specific	590.38	289	289	7.53	10	>sp|O14672|ADA10_HUMAN Disintegrin and metalloproteinase domain-containing protein 10 OS=Homo sapiens GN=ADAM10 PE=1 SV=1	421	cacoP7gpep1.7882.7882.2	controllerType=0 controllerNumber=1 scan=7882	25.4136
07884:2	26	R.N[+1702.581]ISQVLEK.K	HexNAc(2)Hex(8)Fuc(0)NeuAc(0)	N[+1703]	1317.07	2	2633.12	2633.11	0	6.1	439	Specific	613.62	298.67	298.67	9.17	10	>sp|O14672|ADA10_HUMAN Disintegrin and metalloproteinase domain-containing protein 10 OS=Homo sapiens GN=ADAM10 PE=1 SV=1	421	cacoP7gpep1.7901.7901.2	controllerType=0 controllerNumber=1 scan=7901	25.459
07875:2	26	R.N[+1702.581]ISQVLEK.K	HexNAc(2)Hex(8)Fuc(0)NeuAc(0)	N[+1703]	1317.06	2	2633.12	2633.11	0	4.1	439	Specific	621.32	300.79	300.79	9.34	10	>sp|O14672|ADA10_HUMAN Disintegrin and metalloproteinase domain-containing protein 10 OS=Homo sapiens GN=ADAM10 PE=1 SV=1	421	cacoP7gpep1.7893.7893.2	controllerType=0 controllerNumber=1 scan=7893	25.4405
08087:2	26	R.N[+1540.529]ISQVLEK.K	HexNAc(2)Hex(7)Fuc(0)NeuAc(0)	N[+1541]	1236.04	2	2471.07	2471.05	0	5.4	439	Specific	634.95	303.51	303.51	9.31	10	>sp|O14672|ADA10_HUMAN Disintegrin and metalloproteinase domain-containing protein 10 OS=Homo sapiens GN=ADAM10 PE=1 SV=1	421	cacoP7gpep1.8056.8056.2	controllerType=0 controllerNumber=1 scan=8056	25.8669
11791:3	28	R.VFGSQN[+1864.634]LTTVK.L	HexNAc(2)Hex(9)Fuc(0)NeuAc(0)	N[+1865]	1020.1	3	3058.3	3058.29	0	3.8	510	Specific	268.91	122.37	122.37	5.21	12	>sp|Q9Y4L1|HYOU1_HUMAN Hypoxia up-regulated protein 1 OS=Homo sapiens GN=HYOU1 PE=1 SV=1	7851	cacoP7gpep1.10997.10997.3	controllerType=0 controllerNumber=1 scan=10997	35.2183
11842:3	28	R.VFGSQN[+1702.581]LTTVK.L	HexNAc(2)Hex(8)Fuc(0)NeuAc(0)	N[+1703]	966.086	3	2896.24	2896.23	0	3.6	510	Specific	349.61	155.48	155.48	5.54	12	>sp|Q9Y4L1|HYOU1_HUMAN Hypoxia up-regulated protein 1 OS=Homo sapiens GN=HYOU1 PE=1 SV=1	7851	cacoP7gpep1.11035.11035.3	controllerType=0 controllerNumber=1 scan=11035	35.3774
11941:2	28	R.VFGSQN[+1864.634]LTTVK.L	HexNAc(2)Hex(9)Fuc(0)NeuAc(0)	N[+1865]	1529.65	2	3058.3	3058.29	0	4.1	510	Specific	435.65	272.34	272.34	6.34	12	>sp|Q9Y4L1|HYOU1_HUMAN Hypoxia up-regulated protein 1 OS=Homo sapiens GN=HYOU1 PE=1 SV=1	7851	cacoP7gpep1.11113.11113.2	controllerType=0 controllerNumber=1 scan=11113	35.6665
12148:2	28	R.VFGSQN[+1378.476]LTTVK.L	HexNAc(2)Hex(6)Fuc(0)NeuAc(0)	N[+1378]	1286.57	2	2572.13	2572.13	0	1	510	Specific	460.4	306.9	306.9	6.55	12	>sp|Q9Y4L1|HYOU1_HUMAN Hypoxia up-regulated protein 1 OS=Homo sapiens GN=HYOU1 PE=1 SV=1	7851	cacoP7gpep1.11274.11274.2	controllerType=0 controllerNumber=1 scan=11274	36.3571
12135:2	28	R.VFGSQN[+1378.476]LTTVK.L	HexNAc(2)Hex(6)Fuc(0)NeuAc(0)	N[+1378]	1286.57	2	2572.13	2572.13	0	-0.7	510	Specific	471.77	316.36	316.36	6.37	12	>sp|Q9Y4L1|HYOU1_HUMAN Hypoxia up-regulated protein 1 OS=Homo sapiens GN=HYOU1 PE=1 SV=1	7851	cacoP7gpep1.11263.11263.2	controllerType=0 controllerNumber=1 scan=11263	36.3095
12028:2	28	R.VFGSQN[+1540.529]LTTVK.L	HexNAc(2)Hex(7)Fuc(0)NeuAc(0)	N[+1541]	1367.6	2	2734.19	2734.18	0	4.5	510	Specific	537.86	364.66	364.66	7.23	12	>sp|Q9Y4L1|HYOU1_HUMAN Hypoxia up-regulated protein 1 OS=Homo sapiens GN=HYOU1 PE=1 SV=1	7851	cacoP7gpep1.11176.11176.2	controllerType=0 controllerNumber=1 scan=11176	35.9433
11937:3	28	R.VFGSQN[+1702.581]LTTVK.L	HexNAc(2)Hex(8)Fuc(0)NeuAc(0)	N[+1703]	966.084	3	2896.24	2896.23	0	1.5	510	Specific	591.21	313.41	313.41	8.13	12	>sp|Q9Y4L1|HYOU1_HUMAN Hypoxia up-regulated protein 1 OS=Homo sapiens GN=HYOU1 PE=1 SV=1	7851	cacoP7gpep1.11110.11110.3	controllerType=0 controllerNumber=1 scan=11110	35.6499
11874:2	28	R.VFGSQN[+1702.581]LTTVK.L	HexNAc(2)Hex(8)Fuc(0)NeuAc(0)	N[+1703]	1448.62	2	2896.24	2896.23	0	1.1	510	Specific	597.2	418.84	418.84	9.94	12	>sp|Q9Y4L1|HYOU1_HUMAN Hypoxia up-regulated protein 1 OS=Homo sapiens GN=HYOU1 PE=1 SV=1	7851	cacoP7gpep1.11058.11058.2	controllerType=0 controllerNumber=1 scan=11058	35.4577
11806:2	28	R.VFGSQN[+1864.634]LTTVK.L	HexNAc(2)Hex(9)Fuc(0)NeuAc(0)	N[+1865]	1529.65	2	3058.3	3058.29	0	4.4	510	Specific	622.98	370.39	370.39	9.7	12	>sp|Q9Y4L1|HYOU1_HUMAN Hypoxia up-regulated protein 1 OS=Homo sapiens GN=HYOU1 PE=1 SV=1	7851	cacoP7gpep1.11009.11009.2	controllerType=0 controllerNumber=1 scan=11009	35.266
01658:2	28	K.N[+1540.529]ATLAEQAK.L	HexNAc(2)Hex(7)Fuc(0)NeuAc(0)	N[+1541]	1243.52	2	2486.04	2486.03	0	3.2	869	Specific	500.27	308.52	308.52	6.86	12	>sp|Q9Y4L1|HYOU1_HUMAN Hypoxia up-regulated protein 1 OS=Homo sapiens GN=HYOU1 PE=1 SV=1	7851	cacoP7gpep1.3155.3155.2	controllerType=0 controllerNumber=1 scan=3155	12.4647
01563:2	28	K.N[+1864.634]ATLAEQAK.L	HexNAc(2)Hex(9)Fuc(0)NeuAc(0)	N[+1865]	1405.57	2	2810.14	2810.13	0	2.8	869	Specific	611.2	379.72	379.72	9.79	12	>sp|Q9Y4L1|HYOU1_HUMAN Hypoxia up-regulated protein 1 OS=Homo sapiens GN=HYOU1 PE=1 SV=1	7851	cacoP7gpep1.3080.3080.2	controllerType=0 controllerNumber=1 scan=3080	12.2376
01570:2	28	K.N[+1702.581]ATLAEQAK.L	HexNAc(2)Hex(8)Fuc(0)NeuAc(0)	N[+1703]	1324.55	2	2648.09	2648.08	0	4.6	869	Specific	624.76	369.82	369.82	9.7	12	>sp|Q9Y4L1|HYOU1_HUMAN Hypoxia up-regulated protein 1 OS=Homo sapiens GN=HYOU1 PE=1 SV=1	7851	cacoP7gpep1.3086.3086.2	controllerType=0 controllerNumber=1 scan=3086	12.2607
05763:3	28	R.AEPPLN[+1702.581]ASASDQGEK.V	HexNAc(2)Hex(8)Fuc(0)NeuAc(0)	N[+1703]	1072.78	3	3216.31	3216.29	0	5.6	926	Specific	224.63	182.93	182.93	5.5	12	>sp|Q9Y4L1|HYOU1_HUMAN Hypoxia up-regulated protein 1 OS=Homo sapiens GN=HYOU1 PE=1 SV=1	7851	cacoP7gpep1.6302.6302.3	controllerType=0 controllerNumber=1 scan=6302	21.3416
06069:3	28	R.AEPPLN[+1378.476]ASASDQGEK.V	HexNAc(2)Hex(6)Fuc(0)NeuAc(0)	N[+1378]	964.74	3	2892.2	2892.19	0	5.7	926	Specific	235.66	173.78	173.78	4.52	12	>sp|Q9Y4L1|HYOU1_HUMAN Hypoxia up-regulated protein 1 OS=Homo sapiens GN=HYOU1 PE=1 SV=1	7851	cacoP7gpep1.6513.6513.3	controllerType=0 controllerNumber=1 scan=6513	21.864
05398:3	28	R.AEPPLN[+1702.581]ASASDQGEK.V	HexNAc(2)Hex(8)Fuc(0)NeuAc(0)	N[+1703]	1072.77	3	3216.3	3216.29	0	2.3	926	Specific	339.76	289.46	289.46	6.19	12	>sp|Q9Y4L1|HYOU1_HUMAN Hypoxia up-regulated protein 1 OS=Homo sapiens GN=HYOU1 PE=1 SV=1	7851	cacoP7gpep1.6040.6040.3	controllerType=0 controllerNumber=1 scan=6040	20.7063
05720:3	28	R.AEPPLN[+1378.476]ASASDQGEK.V	HexNAc(2)Hex(6)Fuc(0)NeuAc(0)	N[+1378]	964.738	3	2892.2	2892.19	0	3.8	926	Specific	354.56	237.69	237.69	5.89	12	>sp|Q9Y4L1|HYOU1_HUMAN Hypoxia up-regulated protein 1 OS=Homo sapiens GN=HYOU1 PE=1 SV=1	7851	cacoP7gpep1.6270.6270.3	controllerType=0 controllerNumber=1 scan=6270	21.26
05501:2	28	R.AEPPLN[+1702.581]ASASDQGEK.V	HexNAc(2)Hex(8)Fuc(0)NeuAc(0)	N[+1703]	1608.66	2	3216.32	3216.29	0	8.1	926	Specific	452.6	330.95	330.95	6.67	12	>sp|Q9Y4L1|HYOU1_HUMAN Hypoxia up-regulated protein 1 OS=Homo sapiens GN=HYOU1 PE=1 SV=1	7851	cacoP7gpep1.6112.6112.2	controllerType=0 controllerNumber=1 scan=6112	20.8794
05552:3	28	R.AEPPLN[+1540.529]ASASDQGEK.V	HexNAc(2)Hex(7)Fuc(0)NeuAc(0)	N[+1541]	1018.76	3	3054.25	3054.24	0	3.9	926	Specific	459.87	308.5	308.5	6.47	12	>sp|Q9Y4L1|HYOU1_HUMAN Hypoxia up-regulated protein 1 OS=Homo sapiens GN=HYOU1 PE=1 SV=1	7851	cacoP7gpep1.6149.6149.3	controllerType=0 controllerNumber=1 scan=6149	20.9647
05908:2	28	R.AEPPLN[+1378.476]ASASDQGEK.V	HexNAc(2)Hex(6)Fuc(0)NeuAc(0)	N[+1378]	1446.6	2	2892.2	2892.19	0	4.5	926	Specific	471.59	372.21	372.21	7.1	12	>sp|Q9Y4L1|HYOU1_HUMAN Hypoxia up-regulated protein 1 OS=Homo sapiens GN=HYOU1 PE=1 SV=1	7851	cacoP7gpep1.6401.6401.2	controllerType=0 controllerNumber=1 scan=6401	21.5836
05733:2	28	R.AEPPLN[+1378.476]ASASDQGEK.V	HexNAc(2)Hex(6)Fuc(0)NeuAc(0)	N[+1378]	1446.61	2	2892.21	2892.19	0	8.7	926	Specific	481.59	414	414	8.01	12	>sp|Q9Y4L1|HYOU1_HUMAN Hypoxia up-regulated protein 1 OS=Homo sapiens GN=HYOU1 PE=1 SV=1	7851	cacoP7gpep1.6279.6279.2	controllerType=0 controllerNumber=1 scan=6279	21.2823
20427:4	29	R.RIQN[+2863.041]YSVMDIC[+57.021]DYDESSGR.W	HexNAc(5)Hex(6)Fuc(4)NeuAc(1)	C[+57], N[+2863]	1293.77	4	5172.06	5171.04	1	2.8	318	Specific	37.83	37.83	37.83	2.61	23	>sp|P27487|DPP4_HUMAN Dipeptidyl peptidase 4 OS=Homo sapiens GN=DPP4 PE=1 SV=2	4838	cacoP7gpep1.17881.17881.4	controllerType=0 controllerNumber=1 scan=17881	68.0603
17752:3	29	R.RIQN[+1540.529]YSVMDIC[+57.021]DYDESSGR.W	HexNAc(2)Hex(7)Fuc(0)NeuAc(0)	C[+57], N[+1541]	1283.52	3	3848.54	3848.53	0	3.3	318	Specific	204.98	129.52	129.52	4.45	23	>sp|P27487|DPP4_HUMAN Dipeptidyl peptidase 4 OS=Homo sapiens GN=DPP4 PE=1 SV=2	4838	cacoP7gpep1.15575.15575.3	controllerType=0 controllerNumber=1 scan=15575	57.0938
20325:3	29	R.RIQN[+1872.651]YSVMDIC[+57.021]DYDESSGR.W	HexNAc(3)Hex(6)Fuc(0)NeuAc(1)	C[+57], N[+1873]	1394.56	3	4181.66	4180.65	1	1.5	318	Specific	229.44	157.8	50.08	6.1	23	>sp|P27487|DPP4_HUMAN Dipeptidyl peptidase 4 OS=Homo sapiens GN=DPP4 PE=1 SV=2	4838	cacoP7gpep1.17769.17769.3	controllerType=0 controllerNumber=1 scan=17769	67.5953
17716:3	29	R.RIQN[+1540.529]YSVMDIC[+57.021]DYDESSGR.W	HexNAc(2)Hex(7)Fuc(0)NeuAc(0)	C[+57], N[+1541]	1283.52	3	3848.53	3848.53	0	1.4	318	Specific	386.6	247.28	247.28	6.8	23	>sp|P27487|DPP4_HUMAN Dipeptidyl peptidase 4 OS=Homo sapiens GN=DPP4 PE=1 SV=2	4838	cacoP7gpep1.15549.15549.3	controllerType=0 controllerNumber=1 scan=15549	56.9606
22838:3	29	R.IQN[+1710.598]YSVMDIC[+57.021]DYDESSGR.W	HexNAc(3)Hex(5)Fuc(0)NeuAc(1)	C[+57], N[+1711]	1288.17	3	3862.5	3862.49	0	0.6	319	Specific	461.54	338.79	338.79	7.03	23	>sp|P27487|DPP4_HUMAN Dipeptidyl peptidase 4 OS=Homo sapiens GN=DPP4 PE=1 SV=2	4838	cacoP7gpep1.21273.21273.3	controllerType=0 controllerNumber=1 scan=21273	82.4706
22757:3	29	R.IQN[+1872.651]YSVMDIC[+57.021]DYDESSGR.W	HexNAc(3)Hex(6)Fuc(0)NeuAc(1)	C[+57], N[+1873]	1342.19	3	4024.57	4024.55	0	5.5	319	Specific	480.94	356.19	28.14	7.28	23	>sp|P27487|DPP4_HUMAN Dipeptidyl peptidase 4 OS=Homo sapiens GN=DPP4 PE=1 SV=2	4838	cacoP7gpep1.21101.21101.3	controllerType=0 controllerNumber=1 scan=21101	81.7554
20418:3	29	R.IQN[+1540.529]YSVMDIC[+57.021]DYDESSGR.W	HexNAc(2)Hex(7)Fuc(0)NeuAc(0)	C[+57], N[+1541]	1231.48	3	3692.43	3692.42	0	0.6	319	Specific	580.66	464.22	464.22	10.35	23	>sp|P27487|DPP4_HUMAN Dipeptidyl peptidase 4 OS=Homo sapiens GN=DPP4 PE=1 SV=2	4838	cacoP7gpep1.17873.17873.3	controllerType=0 controllerNumber=1 scan=17873	68.0252
22964:3	29	K.KLDFIILN[+2350.830]ETK.F	HexNAc(4)Hex(5)Fuc(1)NeuAc(2)	N[+2351]	1228.88	3	3684.62	3684.6	0	3.7	513	Specific	99.84	46.81	46.81	2.44	23	>sp|P27487|DPP4_HUMAN Dipeptidyl peptidase 4 OS=Homo sapiens GN=DPP4 PE=1 SV=2	4838	cacoP7gpep1.21674.21674.3	controllerType=0 controllerNumber=1 scan=21674	84.1989
20087:3	29	K.KLDFIILN[+2018.708]ETK.F	HexNAc(3)Hex(6)Fuc(1)NeuAc(1)	N[+2019]	1118.17	3	3352.51	3352.48	0	7.7	513	Specific	118.47	118.47	118.47	2.01	23	>sp|P27487|DPP4_HUMAN Dipeptidyl peptidase 4 OS=Homo sapiens GN=DPP4 PE=1 SV=2	4838	cacoP7gpep1.17537.17537.3	controllerType=0 controllerNumber=1 scan=17537	66.5816
20336:3	29	K.KLDFIILN[+1872.651]ETK.F	HexNAc(3)Hex(6)Fuc(0)NeuAc(1)	N[+1873]	1069.48	3	3206.44	3206.42	0	3.8	513	Specific	183.78	71.35	71.35	2.81	23	>sp|P27487|DPP4_HUMAN Dipeptidyl peptidase 4 OS=Homo sapiens GN=DPP4 PE=1 SV=2	4838	cacoP7gpep1.17779.17779.3	controllerType=0 controllerNumber=1 scan=17779	67.638
16736:3	29	K.KLDFIILN[+1873.671]ETK.F	HexNAc(3)Hex(6)Fuc(2)NeuAc(0)	N[+1874]	1069.82	3	3207.45	3207.44	0	2.7	513	Specific	194.09	127.91	127.91	3.52	23	>sp|P27487|DPP4_HUMAN Dipeptidyl peptidase 4 OS=Homo sapiens GN=DPP4 PE=1 SV=2	4838	cacoP7gpep1.14796.14796.3	controllerType=0 controllerNumber=1 scan=14796	53.1968
19889:3	29	K.KLDFIILN[+2351.851]ETK.F	HexNAc(4)Hex(5)Fuc(3)NeuAc(1)	N[+2352]	1229.22	3	3685.63	3685.62	0	2.6	513	Specific	220.49	60.05	60.05	4.83	23	>sp|P27487|DPP4_HUMAN Dipeptidyl peptidase 4 OS=Homo sapiens GN=DPP4 PE=1 SV=2	4838	cacoP7gpep1.17364.17364.3	controllerType=0 controllerNumber=1 scan=17364	65.7633
16695:3	29	K.KLDFIILN[+1864.634]ETK.F	HexNAc(2)Hex(9)Fuc(0)NeuAc(0)	N[+1865]	1066.81	3	3198.43	3198.41	0	6.6	513	Specific	234.74	98.7	98.7	3.04	23	>sp|P27487|DPP4_HUMAN Dipeptidyl peptidase 4 OS=Homo sapiens GN=DPP4 PE=1 SV=2	4838	cacoP7gpep1.14764.14764.3	controllerType=0 controllerNumber=1 scan=14764	53.0353
22926:3	29	K.KLDFIILN[+2553.910]ETK.F	HexNAc(5)Hex(5)Fuc(1)NeuAc(2)	N[+2554]	1296.57	3	3887.68	3887.68	0	0.7	513	Specific	235.13	95.85	95.85	4.88	23	>sp|P27487|DPP4_HUMAN Dipeptidyl peptidase 4 OS=Homo sapiens GN=DPP4 PE=1 SV=2	4838	cacoP7gpep1.21531.21531.3	controllerType=0 controllerNumber=1 scan=21531	83.5775
22875:3	29	K.KLDFIILN[+2350.830]ETK.F	HexNAc(4)Hex(5)Fuc(1)NeuAc(2)	N[+2351]	1228.88	3	3684.64	3684.6	0	9.5	513	Specific	236	153.17	153.17	4.74	23	>sp|P27487|DPP4_HUMAN Dipeptidyl peptidase 4 OS=Homo sapiens GN=DPP4 PE=1 SV=2	4838	cacoP7gpep1.21328.21328.3	controllerType=0 controllerNumber=1 scan=21328	82.7146
20307:3	29	K.KLDFIILN[+2408.872]ETK.F	HexNAc(5)Hex(5)Fuc(2)NeuAc(1)	N[+2409]	1248.23	3	3742.67	3742.64	0	5.8	513	Specific	252.99	134.93	134.93	5.45	23	>sp|P27487|DPP4_HUMAN Dipeptidyl peptidase 4 OS=Homo sapiens GN=DPP4 PE=1 SV=2	4838	cacoP7gpep1.17751.17751.4	controllerType=0 controllerNumber=1 scan=17751	67.5203
20191:3	29	K.KLDFIILN[+2205.793]ETK.F	HexNAc(4)Hex(5)Fuc(2)NeuAc(1)	N[+2206]	1180.52	3	3539.56	3539.57	0	-1.7	513	Specific	255.6	57.85	57.85	3.91	23	>sp|P27487|DPP4_HUMAN Dipeptidyl peptidase 4 OS=Homo sapiens GN=DPP4 PE=1 SV=2	4838	cacoP7gpep1.17629.17629.3	controllerType=0 controllerNumber=1 scan=17629	66.9917
22971:3	29	K.KLDFIILN[+2350.830]ETK.F	HexNAc(4)Hex(5)Fuc(1)NeuAc(2)	N[+2351]	1228.88	3	3684.63	3684.6	0	8	513	Specific	259.35	171.45	171.45	5.6	23	>sp|P27487|DPP4_HUMAN Dipeptidyl peptidase 4 OS=Homo sapiens GN=DPP4 PE=1 SV=2	4838	cacoP7gpep1.21690.21690.3	controllerType=0 controllerNumber=1 scan=21690	84.266
20070:3	29	K.KLDFIILN[+2059.735]ETK.F	HexNAc(4)Hex(5)Fuc(1)NeuAc(1)	N[+2060]	1131.85	3	3393.52	3393.51	0	4.1	513	Specific	270.22	142.32	142.32	5.5	23	>sp|P27487|DPP4_HUMAN Dipeptidyl peptidase 4 OS=Homo sapiens GN=DPP4 PE=1 SV=2	4838	cacoP7gpep1.17525.17525.3	controllerType=0 controllerNumber=1 scan=17525	66.5234
20260:3	29	K.KLDFIILN[+2018.708]ETK.F	HexNAc(3)Hex(6)Fuc(1)NeuAc(1)	N[+2019]	1118.17	3	3352.49	3352.48	0	1.9	513	Specific	270.72	143.84	143.84	5.53	23	>sp|P27487|DPP4_HUMAN Dipeptidyl peptidase 4 OS=Homo sapiens GN=DPP4 PE=1 SV=2	4838	cacoP7gpep1.17694.17694.3	controllerType=0 controllerNumber=1 scan=17694	67.278
16775:3	29	K.KLDFIILN[+2117.777]ETK.F	HexNAc(5)Hex(5)Fuc(2)NeuAc(0)	N[+2118]	1151.19	3	3451.56	3451.55	0	1.7	513	Specific	292.88	145.21	145.21	5.65	23	>sp|P27487|DPP4_HUMAN Dipeptidyl peptidase 4 OS=Homo sapiens GN=DPP4 PE=1 SV=2	4838	cacoP7gpep1.14827.14827.3	controllerType=0 controllerNumber=1 scan=14827	53.3533
22905:3	29	K.KLDFIILN[+2350.830]ETK.F	HexNAc(4)Hex(5)Fuc(1)NeuAc(2)	N[+2351]	1228.88	3	3684.62	3684.6	0	3.5	513	Specific	297.55	176.39	176.39	5.8	23	>sp|P27487|DPP4_HUMAN Dipeptidyl peptidase 4 OS=Homo sapiens GN=DPP4 PE=1 SV=2	4838	cacoP7gpep1.21467.21467.3	controllerType=0 controllerNumber=1 scan=21467	83.3044
22914:3	29	K.KLDFIILN[+2553.910]ETK.F	HexNAc(5)Hex(5)Fuc(1)NeuAc(2)	N[+2554]	1296.56	3	3887.68	3887.68	0	-0.9	513	Specific	309.88	195.51	195.51	5.45	23	>sp|P27487|DPP4_HUMAN Dipeptidyl peptidase 4 OS=Homo sapiens GN=DPP4 PE=1 SV=2	4838	cacoP7gpep1.21499.21499.3	controllerType=0 controllerNumber=1 scan=21499	83.4356
20027:3	29	K.KLDFIILN[+2205.793]ETK.F	HexNAc(4)Hex(5)Fuc(2)NeuAc(1)	N[+2206]	1180.54	3	3539.59	3539.57	0	7.5	513	Specific	319.31	301.49	301.49	6.05	23	>sp|P27487|DPP4_HUMAN Dipeptidyl peptidase 4 OS=Homo sapiens GN=DPP4 PE=1 SV=2	4838	cacoP7gpep1.17486.17486.3	controllerType=0 controllerNumber=1 scan=17486	66.3498
20346:3	29	K.KLDFIILN[+2408.872]ETK.F	HexNAc(5)Hex(5)Fuc(2)NeuAc(1)	N[+2409]	1248.23	3	3742.67	3742.64	0	5.8	513	Specific	334.55	212.4	212.4	6.03	23	>sp|P27487|DPP4_HUMAN Dipeptidyl peptidase 4 OS=Homo sapiens GN=DPP4 PE=1 SV=2	4838	cacoP7gpep1.17792.17792.3	controllerType=0 controllerNumber=1 scan=17792	67.6886
20330:3	29	K.KLDFIILN[+2408.872]ETK.F	HexNAc(5)Hex(5)Fuc(2)NeuAc(1)	N[+2409]	1248.23	3	3742.68	3742.64	0	9.8	513	Specific	349.82	221.42	221.42	5.33	23	>sp|P27487|DPP4_HUMAN Dipeptidyl peptidase 4 OS=Homo sapiens GN=DPP4 PE=1 SV=2	4838	cacoP7gpep1.17774.17774.3	controllerType=0 controllerNumber=1 scan=17774	67.6147
16749:3	29	K.KLDFIILN[+1702.581]ETK.F	HexNAc(2)Hex(8)Fuc(0)NeuAc(0)	N[+1703]	1012.79	3	3036.36	3036.35	0	1.5	513	Specific	376.36	305.75	305.75	6.36	23	>sp|P27487|DPP4_HUMAN Dipeptidyl peptidase 4 OS=Homo sapiens GN=DPP4 PE=1 SV=2	4838	cacoP7gpep1.14806.14806.3	controllerType=0 controllerNumber=1 scan=14806	53.2472
17030:3	29	K.KLDFIILN[+1971.719]ETK.F	HexNAc(5)Hex(5)Fuc(1)NeuAc(0)	N[+1972]	1102.51	3	3305.5	3305.49	0	3.8	513	Specific	399.69	182.85	182.85	6.09	23	>sp|P27487|DPP4_HUMAN Dipeptidyl peptidase 4 OS=Homo sapiens GN=DPP4 PE=1 SV=2	4838	cacoP7gpep1.15019.15019.3	controllerType=0 controllerNumber=1 scan=15019	54.3114
20386:3	29	K.KLDFIILN[+2262.814]ETK.F	HexNAc(5)Hex(5)Fuc(1)NeuAc(1)	N[+2263]	1199.53	3	3596.57	3596.59	0	-4.4	513	Specific	479.78	343.79	343.79	6.14	23	>sp|P27487|DPP4_HUMAN Dipeptidyl peptidase 4 OS=Homo sapiens GN=DPP4 PE=1 SV=2	4838	cacoP7gpep1.17839.17839.3	controllerType=0 controllerNumber=1 scan=17839	67.8797
18043:3	30	R.TTLVDNNTWN[+1702.581]NSHIALVGK.A	HexNAc(2)Hex(8)Fuc(0)NeuAc(0)	N[+1703]	1267.23	3	3799.67	3799.65	0	4.3	618	Specific	711.49	577.57	23.36	13.66	7	>sp|Q8TCJ2|STT3B_HUMAN Dolichyl-diphosphooligosaccharide--protein glycosyltransferase subunit STT3B OS=Homo sapiens GN=STT3B PE=1 SV=1	16689	cacoP7gpep1.15803.15803.3	controllerType=0 controllerNumber=1 scan=15803	58.2292
18011:3	30	R.TTLVDNNTWN[+1864.634]NSHIALVGK.A	HexNAc(2)Hex(9)Fuc(0)NeuAc(0)	N[+1865]	1321.25	3	3961.72	3961.71	0	4.5	618	Specific	777.53	570.64	25.18	14.66	7	>sp|Q8TCJ2|STT3B_HUMAN Dolichyl-diphosphooligosaccharide--protein glycosyltransferase subunit STT3B OS=Homo sapiens GN=STT3B PE=1 SV=1	16689	cacoP7gpep1.15778.15778.3	controllerType=0 controllerNumber=1 scan=15778	58.1052
02924:2	30	K.AMSSN[+1702.581]ETAAYK.I	HexNAc(2)Hex(8)Fuc(0)NeuAc(0)	N[+1703]	1438.06	2	2875.12	2875.11	0	3.4	637	Specific	505.85	318.32	318.32	6.75	7	>sp|Q8TCJ2|STT3B_HUMAN Dolichyl-diphosphooligosaccharide--protein glycosyltransferase subunit STT3B OS=Homo sapiens GN=STT3B PE=1 SV=1	16689	cacoP7gpep1.4187.4187.2	controllerType=0 controllerNumber=1 scan=4187	15.5204
02915:2	30	K.AMSSN[+1864.634]ETAAYK.I	HexNAc(2)Hex(9)Fuc(0)NeuAc(0)	N[+1865]	1519.09	2	3037.17	3037.16	0	4.5	637	Specific	541.12	348.76	348.76	7.17	7	>sp|Q8TCJ2|STT3B_HUMAN Dolichyl-diphosphooligosaccharide--protein glycosyltransferase subunit STT3B OS=Homo sapiens GN=STT3B PE=1 SV=1	16689	cacoP7gpep1.4178.4178.2	controllerType=0 controllerNumber=1 scan=4178	15.4884
02913:2	30	K.AMSSN[+1864.634]ETAAYK.I	HexNAc(2)Hex(9)Fuc(0)NeuAc(0)	N[+1865]	1519.09	2	3037.17	3037.16	0	3.4	637	Specific	547.53	360.14	360.14	7.31	7	>sp|Q8TCJ2|STT3B_HUMAN Dolichyl-diphosphooligosaccharide--protein glycosyltransferase subunit STT3B OS=Homo sapiens GN=STT3B PE=1 SV=1	16689	cacoP7gpep1.4175.4175.2	controllerType=0 controllerNumber=1 scan=4175	15.481
02929:2	30	K.AMSSN[+1702.581]ETAAYK.I	HexNAc(2)Hex(8)Fuc(0)NeuAc(0)	N[+1703]	1438.06	2	2875.12	2875.11	0	4.1	637	Specific	578.23	309.6	309.6	7.07	7	>sp|Q8TCJ2|STT3B_HUMAN Dolichyl-diphosphooligosaccharide--protein glycosyltransferase subunit STT3B OS=Homo sapiens GN=STT3B PE=1 SV=1	16689	cacoP7gpep1.4191.4191.2	controllerType=0 controllerNumber=1 scan=4191	15.5308
08594:3	31	K.EASQN[+1864.634]ITYIC[+57.021]K.N	HexNAc(2)Hex(9)Fuc(0)NeuAc(0)	C[+57], N[+1865]	1064.43	3	3191.27	3191.27	0	0.8	1396	Specific	297.36	107.83	107.83	5.07	6	>sp|P05997|CO5A2_HUMAN Collagen alpha-2(V) chain OS=Homo sapiens GN=COL5A2 PE=1 SV=3	3514	cacoP7gpep1.8437.8437.3	controllerType=0 controllerNumber=1 scan=8437	27.0461
15660:3	32	R.TILVDNNTWN[+1702.581]NTHISR.V	HexNAc(2)Hex(8)Fuc(0)NeuAc(0)	N[+1703]	1200.85	3	3600.54	3600.53	0	0.7	539	Specific	414.25	318.31	18.12	6.98	9	>sp|P46977|STT3A_HUMAN Dolichyl-diphosphooligosaccharide--protein glycosyltransferase subunit STT3A OS=Homo sapiens GN=STT3A PE=1 SV=2	16688	cacoP7gpep1.13980.13980.3	controllerType=0 controllerNumber=1 scan=13980	49.1228
15271:3	32	R.TILVDNNTWN[+1864.634]NTHISR.V	HexNAc(2)Hex(9)Fuc(0)NeuAc(0)	N[+1865]	1254.87	3	3762.61	3762.59	0	5.5	539	Specific	493.83	415.89	16.8	8.98	9	>sp|P46977|STT3A_HUMAN Dolichyl-diphosphooligosaccharide--protein glycosyltransferase subunit STT3A OS=Homo sapiens GN=STT3A PE=1 SV=2	16688	cacoP7gpep1.13684.13684.3	controllerType=0 controllerNumber=1 scan=13684	47.6469
15097:3	32	R.TILVDNNTWN[+2026.687]NTHISR.V	HexNAc(2)Hex(10)Fuc(0)NeuAc(0)	N[+2027]	1308.89	3	3924.65	3924.64	0	3.8	539	Specific	519.22	390.62	13.27	9.05	9	>sp|P46977|STT3A_HUMAN Dolichyl-diphosphooligosaccharide--protein glycosyltransferase subunit STT3A OS=Homo sapiens GN=STT3A PE=1 SV=2	16688	cacoP7gpep1.13548.13548.3	controllerType=0 controllerNumber=1 scan=13548	46.9742
15284:3	32	R.TILVDNNTWN[+1702.581]NTHISR.V	HexNAc(2)Hex(8)Fuc(0)NeuAc(0)	N[+1703]	1200.85	3	3600.54	3600.53	0	2	539	Specific	540.71	384.57	28.04	9.3	9	>sp|P46977|STT3A_HUMAN Dolichyl-diphosphooligosaccharide--protein glycosyltransferase subunit STT3A OS=Homo sapiens GN=STT3A PE=1 SV=2	16688	cacoP7gpep1.13694.13694.3	controllerType=0 controllerNumber=1 scan=13694	47.6952
15074:3	32	R.TILVDNNTWN[+1864.634]NTHISR.V	HexNAc(2)Hex(9)Fuc(0)NeuAc(0)	N[+1865]	1254.87	3	3762.59	3762.59	0	2.5	539	Specific	560.22	442.91	17.11	9.49	9	>sp|P46977|STT3A_HUMAN Dolichyl-diphosphooligosaccharide--protein glycosyltransferase subunit STT3A OS=Homo sapiens GN=STT3A PE=1 SV=2	16688	cacoP7gpep1.13525.13525.3	controllerType=0 controllerNumber=1 scan=13525	46.8662
15184:3	32	R.TILVDNNTWN[+1540.529]NTHISR.V	HexNAc(2)Hex(7)Fuc(0)NeuAc(0)	N[+1541]	1146.84	3	3438.5	3438.48	0	4.4	539	Specific	705.2	581.45	24.42	13.66	9	>sp|P46977|STT3A_HUMAN Dolichyl-diphosphooligosaccharide--protein glycosyltransferase subunit STT3A OS=Homo sapiens GN=STT3A PE=1 SV=2	16688	cacoP7gpep1.13614.13614.3	controllerType=0 controllerNumber=1 scan=13614	47.2969
15110:3	32	R.TILVDNNTWN[+1702.581]NTHISR.V	HexNAc(2)Hex(8)Fuc(0)NeuAc(0)	N[+1703]	1200.85	3	3600.54	3600.53	0	2	539	Specific	738.85	555.16	27.69	13.67	9	>sp|P46977|STT3A_HUMAN Dolichyl-diphosphooligosaccharide--protein glycosyltransferase subunit STT3A OS=Homo sapiens GN=STT3A PE=1 SV=2	16688	cacoP7gpep1.13558.13558.3	controllerType=0 controllerNumber=1 scan=13558	47.0223
15161:3	32	R.TILVDNNTWN[+1540.529]NTHISR.V	HexNAc(2)Hex(7)Fuc(0)NeuAc(0)	N[+1541]	1146.84	3	3438.5	3438.48	0	6.9	539	Specific	745.15	568.64	24.3	13.45	9	>sp|P46977|STT3A_HUMAN Dolichyl-diphosphooligosaccharide--protein glycosyltransferase subunit STT3A OS=Homo sapiens GN=STT3A PE=1 SV=2	16688	cacoP7gpep1.13597.13597.3	controllerType=0 controllerNumber=1 scan=13597	47.2158
18619:3	33	K.IIKEFIN[+2861.000]K.T	HexNAc(5)Hex(6)Fuc(0)NeuAc(3)	N[+2861]	1289.21	3	3865.62	3865.61	0	2.9	37	Specific	163.98	64.27	64.27	2.87	16	>sp|P11169|GTR3_HUMAN Solute carrier family 2, facilitated glucose transporter member 3 OS=Homo sapiens GN=SLC2A3 PE=2 SV=1	7244	cacoP7gpep1.16248.16248.3	controllerType=0 controllerNumber=1 scan=16248	60.4428
06952:3	33	K.IIKEFIN[+1864.634]K.T	HexNAc(2)Hex(9)Fuc(0)NeuAc(0)	N[+1865]	957.087	3	2869.25	2869.25	0	-0.2	37	Specific	178.12	173.41	173.41	3.38	16	>sp|P11169|GTR3_HUMAN Solute carrier family 2, facilitated glucose transporter member 3 OS=Homo sapiens GN=SLC2A3 PE=2 SV=1	7244	cacoP7gpep1.7158.7158.3	controllerType=0 controllerNumber=1 scan=7158	23.4286
18645:3	33	K.IIKEFIN[+2861.000]K.T	HexNAc(5)Hex(6)Fuc(0)NeuAc(3)	N[+2861]	1289.21	3	3865.61	3865.61	0	0.2	37	Specific	280.74	149.81	149.81	5.59	16	>sp|P11169|GTR3_HUMAN Solute carrier family 2, facilitated glucose transporter member 3 OS=Homo sapiens GN=SLC2A3 PE=2 SV=1	7244	cacoP7gpep1.16268.16268.3	controllerType=0 controllerNumber=1 scan=16268	60.5434
17089:3	33	K.EFIN[+3065.100]K.T	HexNAc(6)Hex(6)Fuc(2)NeuAc(2)	N[+3065]	1239.16	3	3715.46	3715.45	0	3.2	40	Specific	229.72	36.76	36.76	2.32	16	>sp|P11169|GTR3_HUMAN Solute carrier family 2, facilitated glucose transporter member 3 OS=Homo sapiens GN=SLC2A3 PE=2 SV=1	7244	cacoP7gpep1.15061.15061.3	controllerType=0 controllerNumber=1 scan=15061	54.5242
17343:3	33	K.EFIN[+2861.000]K.T	HexNAc(5)Hex(6)Fuc(0)NeuAc(3)	N[+2861]	1171.13	3	3511.37	3511.35	0	4.2	40	Specific	239.44	69.17	69.17	2.93	16	>sp|P11169|GTR3_HUMAN Solute carrier family 2, facilitated glucose transporter member 3 OS=Homo sapiens GN=SLC2A3 PE=2 SV=1	7244	cacoP7gpep1.15259.15259.3	controllerType=0 controllerNumber=1 scan=15259	55.5116
16751:3	33	K.EFIN[+2861.000]K.T	HexNAc(5)Hex(6)Fuc(0)NeuAc(3)	N[+2861]	1171.12	3	3511.35	3511.35	0	-0.6	40	Specific	242.19	70.87	70.87	2.87	16	>sp|P11169|GTR3_HUMAN Solute carrier family 2, facilitated glucose transporter member 3 OS=Homo sapiens GN=SLC2A3 PE=2 SV=1	7244	cacoP7gpep1.14808.14808.3	controllerType=0 controllerNumber=1 scan=14808	53.258
17331:3	33	K.EFIN[+2861.000]K.T	HexNAc(5)Hex(6)Fuc(0)NeuAc(3)	N[+2861]	1171.12	3	3511.35	3511.35	0	-0.4	40	Specific	248.17	75.5	75.5	2.87	16	>sp|P11169|GTR3_HUMAN Solute carrier family 2, facilitated glucose transporter member 3 OS=Homo sapiens GN=SLC2A3 PE=2 SV=1	7244	cacoP7gpep1.15248.15248.3	controllerType=0 controllerNumber=1 scan=15248	55.4561
17078:3	33	K.EFIN[+3064.079]K.T	HexNAc(6)Hex(6)Fuc(0)NeuAc(3)	N[+3064]	1238.83	3	3714.46	3714.43	0	9.3	40	Specific	259.94	80.37	80.37	2.75	16	>sp|P11169|GTR3_HUMAN Solute carrier family 2, facilitated glucose transporter member 3 OS=Homo sapiens GN=SLC2A3 PE=2 SV=1	7244	cacoP7gpep1.15053.15053.3	controllerType=0 controllerNumber=1 scan=15053	54.4846
02453:2	33	K.EFIN[+1702.581]K.T	HexNAc(2)Hex(8)Fuc(0)NeuAc(0)	N[+1703]	1176.98	2	2352.95	2352.93	0	9.3	40	Specific	384.25	111.92	111.92	3.42	16	>sp|P11169|GTR3_HUMAN Solute carrier family 2, facilitated glucose transporter member 3 OS=Homo sapiens GN=SLC2A3 PE=2 SV=1	7244	cacoP7gpep1.3812.3812.2	controllerType=0 controllerNumber=1 scan=3812	14.4425
02419:2	33	K.EFIN[+1864.634]K.T	HexNAc(2)Hex(9)Fuc(0)NeuAc(0)	N[+1865]	1258	2	2515	2514.98	0	5.1	40	Specific	431.77	132.3	132.3	4.86	16	>sp|P11169|GTR3_HUMAN Solute carrier family 2, facilitated glucose transporter member 3 OS=Homo sapiens GN=SLC2A3 PE=2 SV=1	7244	cacoP7gpep1.3783.3783.2	controllerType=0 controllerNumber=1 scan=3783	14.3494
15390:2	35	K.GELN[+1540.529]TSIFSSR.P	HexNAc(2)Hex(7)Fuc(0)NeuAc(0)	N[+1541]	1376.08	2	2751.15	2751.13	0	4.1	350	Specific	344.22	197.61	197.61	6.02	8	>sp|Q9UHG3|PCYOX_HUMAN Prenylcysteine oxidase 1 OS=Homo sapiens GN=PCYOX1 PE=1 SV=3	12737	cacoP7gpep1.13782.13782.2	controllerType=0 controllerNumber=1 scan=13782	48.1323
15249:3	35	K.GELN[+1702.581]TSIFSSR.P	HexNAc(2)Hex(8)Fuc(0)NeuAc(0)	N[+1703]	971.739	3	2913.2	2913.19	0	5.5	350	Specific	356.68	89.71	89.71	5.02	8	>sp|Q9UHG3|PCYOX_HUMAN Prenylcysteine oxidase 1 OS=Homo sapiens GN=PCYOX1 PE=1 SV=3	12737	cacoP7gpep1.13667.13667.3	controllerType=0 controllerNumber=1 scan=13667	47.564
15300:2	35	K.GELN[+1702.581]TSIFSSR.P	HexNAc(2)Hex(8)Fuc(0)NeuAc(0)	N[+1703]	1457.1	2	2913.2	2913.19	0	3.1	350	Specific	433.09	286.54	286.54	6.48	8	>sp|Q9UHG3|PCYOX_HUMAN Prenylcysteine oxidase 1 OS=Homo sapiens GN=PCYOX1 PE=1 SV=3	12737	cacoP7gpep1.13706.13706.2	controllerType=0 controllerNumber=1 scan=13706	47.7524
15228:2	35	K.GELN[+1864.634]TSIFSSR.P	HexNAc(2)Hex(9)Fuc(0)NeuAc(0)	N[+1865]	1538.13	2	3075.25	3075.24	0	3.9	350	Specific	464.61	297.68	297.68	6.46	8	>sp|Q9UHG3|PCYOX_HUMAN Prenylcysteine oxidase 1 OS=Homo sapiens GN=PCYOX1 PE=1 SV=3	12737	cacoP7gpep1.13648.13648.2	controllerType=0 controllerNumber=1 scan=13648	47.4688
15866:3	35	K.GELN[+1378.476]TSIFSSRPIDK.F	HexNAc(2)Hex(6)Fuc(0)NeuAc(0)	N[+1378]	1014.79	3	3042.35	3042.34	0	3.5	350	Specific	391.33	203.49	203.49	6.26	8	>sp|Q9UHG3|PCYOX_HUMAN Prenylcysteine oxidase 1 OS=Homo sapiens GN=PCYOX1 PE=1 SV=3	12737	cacoP7gpep1.14139.14139.3	controllerType=0 controllerNumber=1 scan=14139	49.9104
15636:3	35	K.GELN[+2026.687]TSIFSSRPIDK.F	HexNAc(2)Hex(10)Fuc(0)NeuAc(0)	N[+2027]	1230.86	3	3690.57	3690.55	0	4	350	Specific	417.68	233.61	233.61	6.2	8	>sp|Q9UHG3|PCYOX_HUMAN Prenylcysteine oxidase 1 OS=Homo sapiens GN=PCYOX1 PE=1 SV=3	12737	cacoP7gpep1.13964.13964.3	controllerType=0 controllerNumber=1 scan=13964	49.0402
15595:3	35	K.GELN[+1864.634]TSIFSSRPIDK.F	HexNAc(2)Hex(9)Fuc(0)NeuAc(0)	N[+1865]	1176.84	3	3528.51	3528.5	0	3.3	350	Specific	652.2	456.86	456.86	12.12	8	>sp|Q9UHG3|PCYOX_HUMAN Prenylcysteine oxidase 1 OS=Homo sapiens GN=PCYOX1 PE=1 SV=3	12737	cacoP7gpep1.13932.13932.3	controllerType=0 controllerNumber=1 scan=13932	48.8803
15728:3	35	K.GELN[+1540.529]TSIFSSRPIDK.F	HexNAc(2)Hex(7)Fuc(0)NeuAc(0)	N[+1541]	1068.81	3	3204.4	3204.39	0	2.4	350	Specific	687.26	415.77	415.77	12.23	8	>sp|Q9UHG3|PCYOX_HUMAN Prenylcysteine oxidase 1 OS=Homo sapiens GN=PCYOX1 PE=1 SV=3	12737	cacoP7gpep1.14035.14035.3	controllerType=0 controllerNumber=1 scan=14035	49.3912
15664:3	35	K.GELN[+1702.581]TSIFSSRPIDK.F	HexNAc(2)Hex(8)Fuc(0)NeuAc(0)	N[+1703]	1122.82	3	3366.45	3366.45	0	0.9	350	Specific	720.56	459.6	459.6	13.08	8	>sp|Q9UHG3|PCYOX_HUMAN Prenylcysteine oxidase 1 OS=Homo sapiens GN=PCYOX1 PE=1 SV=3	12737	cacoP7gpep1.13983.13983.3	controllerType=0 controllerNumber=1 scan=13983	49.1346
20715:3	37	R.VLQWTGASGGLPTN[+2026.687]ETTFAK.I	HexNAc(2)Hex(10)Fuc(0)NeuAc(0)	N[+2027]	1368.58	3	4103.71	4104.74	-1	-6.1	112	Specific	240.35	181.94	181.94	5.38	7	>sp|P51690|ARSE_HUMAN Arylsulfatase E OS=Homo sapiens GN=ARSE PE=1 SV=2	1180	cacoP7gpep1.18192.18192.3	controllerType=0 controllerNumber=1 scan=18192	69.3641
20896:3	37	R.VLQWTGASGGLPTN[+1540.529]ETTFAK.I	HexNAc(2)Hex(7)Fuc(0)NeuAc(0)	N[+1541]	1206.87	3	3618.61	3618.58	0	6.4	112	Specific	257.36	245.5	245.5	6.28	7	>sp|P51690|ARSE_HUMAN Arylsulfatase E OS=Homo sapiens GN=ARSE PE=1 SV=2	1180	cacoP7gpep1.18390.18390.3	controllerType=0 controllerNumber=1 scan=18390	70.2015
20755:3	37	R.VLQWTGASGGLPTN[+1864.634]ETTFAK.I	HexNAc(2)Hex(9)Fuc(0)NeuAc(0)	N[+1865]	1314.91	3	3942.71	3942.69	0	5.6	112	Specific	522.91	466.69	466.69	9.17	7	>sp|P51690|ARSE_HUMAN Arylsulfatase E OS=Homo sapiens GN=ARSE PE=1 SV=2	1180	cacoP7gpep1.18236.18236.3	controllerType=0 controllerNumber=1 scan=18236	69.5554
20750:3	37	R.VLQWTGASGGLPTN[+2026.687]ETTFAK.I	HexNAc(2)Hex(10)Fuc(0)NeuAc(0)	N[+2027]	1368.93	3	4104.78	4104.74	0	9.5	112	Specific	540.95	455.45	455.45	8.63	7	>sp|P51690|ARSE_HUMAN Arylsulfatase E OS=Homo sapiens GN=ARSE PE=1 SV=2	1180	cacoP7gpep1.18229.18229.3	controllerType=0 controllerNumber=1 scan=18229	69.5222
20788:3	37	R.VLQWTGASGGLPTN[+1702.581]ETTFAK.I	HexNAc(2)Hex(8)Fuc(0)NeuAc(0)	N[+1703]	1260.89	3	3780.66	3780.64	0	6.5	112	Specific	646.46	575.35	575.35	11.49	7	>sp|P51690|ARSE_HUMAN Arylsulfatase E OS=Homo sapiens GN=ARSE PE=1 SV=2	1180	cacoP7gpep1.18270.18270.3	controllerType=0 controllerNumber=1 scan=18270	69.7008
09727:3	37	R.N[+2026.687]HTITEQPMC[+57.021]FQR.T	HexNAc(2)Hex(10)Fuc(0)NeuAc(0)	C[+57], N[+2027]	1230.15	3	3688.45	3688.44	0	3	258	Specific	239.16	125.78	125.78	5.61	7	>sp|P51690|ARSE_HUMAN Arylsulfatase E OS=Homo sapiens GN=ARSE PE=1 SV=2	1180	cacoP7gpep1.9313.9313.3	controllerType=0 controllerNumber=1 scan=9313	29.5388
09707:3	37	R.N[+2026.687]HTITEQPMC[+57.021]FQR.T	HexNAc(2)Hex(10)Fuc(0)NeuAc(0)	C[+57], N[+2027]	1230.15	3	3688.45	3688.44	0	1.7	258	Specific	321.63	186.23	186.23	6.2	7	>sp|P51690|ARSE_HUMAN Arylsulfatase E OS=Homo sapiens GN=ARSE PE=1 SV=2	1180	cacoP7gpep1.9299.9299.3	controllerType=0 controllerNumber=1 scan=9299	29.4919
09667:3	37	R.N[+1864.634]HTITEQPMC[+57.021]FQR.T	HexNAc(2)Hex(9)Fuc(0)NeuAc(0)	C[+57], N[+1865]	1176.14	3	3526.41	3526.39	0	6.2	258	Specific	515.97	402.3	402.3	8.5	7	>sp|P51690|ARSE_HUMAN Arylsulfatase E OS=Homo sapiens GN=ARSE PE=1 SV=2	1180	cacoP7gpep1.9269.9269.3	controllerType=0 controllerNumber=1 scan=9269	29.3926
09749:3	37	R.N[+1702.581]HTITEQPMC[+57.021]FQR.T	HexNAc(2)Hex(8)Fuc(0)NeuAc(0)	C[+57], N[+1703]	1122.12	3	3364.34	3364.33	0	2.3	258	Specific	643.66	475.8	475.8	11.23	7	>sp|P51690|ARSE_HUMAN Arylsulfatase E OS=Homo sapiens GN=ARSE PE=1 SV=2	1180	cacoP7gpep1.9331.9331.3	controllerType=0 controllerNumber=1 scan=9331	29.5978
03077:2	38	R.N[+1864.634]YTADYDK.T	HexNAc(2)Hex(9)Fuc(0)NeuAc(0)	N[+1865]	1427.54	2	2854.07	2854.06	0	4.1	106	Specific	514.24	368.08	368.08	7.09	7	>sp|O75477|ERLN1_HUMAN Erlin-1 OS=Homo sapiens GN=ERLIN1 PE=1 SV=1	5433	cacoP7gpep1.4310.4310.2	controllerType=0 controllerNumber=1 scan=4310	15.8959
03069:2	38	R.N[+1864.634]YTADYDK.T	HexNAc(2)Hex(9)Fuc(0)NeuAc(0)	N[+1865]	1427.54	2	2854.07	2854.06	0	5.2	106	Specific	528.57	377.19	377.19	7.18	7	>sp|O75477|ERLN1_HUMAN Erlin-1 OS=Homo sapiens GN=ERLIN1 PE=1 SV=1	5433	cacoP7gpep1.4304.4304.2	controllerType=0 controllerNumber=1 scan=4304	15.871
03067:2	38	R.N[+1702.581]YTADYDK.T	HexNAc(2)Hex(8)Fuc(0)NeuAc(0)	N[+1703]	1346.51	2	2692.01	2692	0	3.2	106	Specific	539.73	413.88	413.88	8.62	7	>sp|O75477|ERLN1_HUMAN Erlin-1 OS=Homo sapiens GN=ERLIN1 PE=1 SV=1	5433	cacoP7gpep1.4302.4302.2	controllerType=0 controllerNumber=1 scan=4302	15.8617
03076:2	38	R.N[+1702.581]YTADYDK.T	HexNAc(2)Hex(8)Fuc(0)NeuAc(0)	N[+1703]	1346.51	2	2692.01	2692	0	4.1	106	Specific	587.63	426.14	426.14	9.98	7	>sp|O75477|ERLN1_HUMAN Erlin-1 OS=Homo sapiens GN=ERLIN1 PE=1 SV=1	5433	cacoP7gpep1.4309.4309.2	controllerType=0 controllerNumber=1 scan=4309	15.8905
16211:3	38	R.N[+1540.529]YTADYDKTLIFNK.I	HexNAc(2)Hex(7)Fuc(0)NeuAc(0)	N[+1541]	1082.8	3	3246.37	3246.37	0	-0.2	106	Specific	401.65	221.91	221.91	5.99	7	>sp|O75477|ERLN1_HUMAN Erlin-1 OS=Homo sapiens GN=ERLIN1 PE=1 SV=1	5433	cacoP7gpep1.14400.14400.3	controllerType=0 controllerNumber=1 scan=14400	51.2148
16074:3	38	R.N[+1864.634]YTADYDKTLIFNK.I	HexNAc(2)Hex(9)Fuc(0)NeuAc(0)	N[+1865]	1190.83	3	3570.49	3570.48	0	3.6	106	Specific	777.62	510.51	510.51	14.13	7	>sp|O75477|ERLN1_HUMAN Erlin-1 OS=Homo sapiens GN=ERLIN1 PE=1 SV=1	5433	cacoP7gpep1.14298.14298.3	controllerType=0 controllerNumber=1 scan=14298	50.7082
16075:3	38	R.N[+1702.581]YTADYDKTLIFNK.I	HexNAc(2)Hex(8)Fuc(0)NeuAc(0)	N[+1703]	1136.82	3	3408.44	3408.42	0	3.7	106	Specific	788.76	561.2	561.2	14.13	7	>sp|O75477|ERLN1_HUMAN Erlin-1 OS=Homo sapiens GN=ERLIN1 PE=1 SV=1	5433	cacoP7gpep1.14299.14299.3	controllerType=0 controllerNumber=1 scan=14299	50.7109
20689:4	40	K.AKQC[+57.021]N[+2498.904]GTSMC[+57.021]WC[+57.021]VNTAGVR.R	HexNAc(6)Hex(7)Fuc(1)NeuAc(0)	C[+57]*3, N[+2499]	1175.71	4	4699.84	4698.86	1	-5	107	Specific	317.03	213.2	213.2	5.43	11	>sp|P16422|EPCAM_HUMAN Epithelial cell adhesion molecule OS=Homo sapiens GN=EPCAM PE=1 SV=2	5349	cacoP7gpep1.18164.18164.3	controllerType=0 controllerNumber=1 scan=18164	69.2439
16083:3	40	K.QC[+57.021]N[+1702.581]GTSMC[+57.021]WC[+57.021]VNTAGVR.R	HexNAc(2)Hex(8)Fuc(0)NeuAc(0)	C[+57]*3, N[+1703]	1235.15	3	3703.43	3703.4	0	9	109	Specific	281.78	160.36	160.36	5.72	11	>sp|P16422|EPCAM_HUMAN Epithelial cell adhesion molecule OS=Homo sapiens GN=EPCAM PE=1 SV=2	5349	cacoP7gpep1.14305.14305.3	controllerType=0 controllerNumber=1 scan=14305	50.7425
16283:3	40	K.QC[+57.021]N[+1216.423]GTSMC[+57.021]WC[+57.021]VNTAGVR.R	HexNAc(2)Hex(5)Fuc(0)NeuAc(0)	C[+57]*3, N[+1216]	1073.09	3	3217.26	3217.24	0	4	109	Specific	290.86	179.03	179.03	6.21	11	>sp|P16422|EPCAM_HUMAN Epithelial cell adhesion molecule OS=Homo sapiens GN=EPCAM PE=1 SV=2	5349	cacoP7gpep1.14459.14459.3	controllerType=0 controllerNumber=1 scan=14459	51.5133
16158:3	40	K.QC[+57.021]N[+1378.476]GTSMC[+57.021]WC[+57.021]VNTAGVR.R	HexNAc(2)Hex(6)Fuc(0)NeuAc(0)	C[+57]*3, N[+1378]	1127.11	3	3379.3	3379.3	0	2.6	109	Specific	462.7	366.02	366.02	7.46	11	>sp|P16422|EPCAM_HUMAN Epithelial cell adhesion molecule OS=Homo sapiens GN=EPCAM PE=1 SV=2	5349	cacoP7gpep1.14362.14362.3	controllerType=0 controllerNumber=1 scan=14362	51.0247
16111:3	40	K.QC[+57.021]N[+1540.529]GTSMC[+57.021]WC[+57.021]VNTAGVR.R	HexNAc(2)Hex(7)Fuc(0)NeuAc(0)	C[+57]*3, N[+1541]	1181.12	3	3541.35	3541.35	0	0.8	109	Specific	583.46	479.57	479.57	10.35	11	>sp|P16422|EPCAM_HUMAN Epithelial cell adhesion molecule OS=Homo sapiens GN=EPCAM PE=1 SV=2	5349	cacoP7gpep1.14329.14329.3	controllerType=0 controllerNumber=1 scan=14329	50.8602
15974:3	40	K.QC[+57.021]N[+1702.581]GTSMC[+57.021]WC[+57.021]VNTAGVR.R	HexNAc(2)Hex(8)Fuc(0)NeuAc(0)	C[+57]*3, N[+1703]	1235.14	3	3703.41	3703.4	0	3.1	109	Specific	642.08	547.27	547.27	11.5	11	>sp|P16422|EPCAM_HUMAN Epithelial cell adhesion molecule OS=Homo sapiens GN=EPCAM PE=1 SV=2	5349	cacoP7gpep1.14218.14218.3	controllerType=0 controllerNumber=1 scan=14218	50.3053
20977:3	40	K.Q[-17.027]C[+57.021]N[+1216.423]GTSMC[+57.021]WC[+57.021]VNTAGVR.R	HexNAc(2)Hex(5)Fuc(0)NeuAc(0)	C[+57]*3, N[+1216], Q[-17]	1067.41	3	3200.22	3200.22	0	2.6	109	Specific	178.26	79.27	79.27	3.17	11	>sp|P16422|EPCAM_HUMAN Epithelial cell adhesion molecule OS=Homo sapiens GN=EPCAM PE=1 SV=2	5349	cacoP7gpep1.18465.18465.3	controllerType=0 controllerNumber=1 scan=18465	70.5355
20819:3	40	K.Q[-17.027]C[+57.021]N[+1378.476]GTSMC[+57.021]WC[+57.021]VNTAGVR.R	HexNAc(2)Hex(6)Fuc(0)NeuAc(0)	C[+57]*3, N[+1378], Q[-17]	1121.43	3	3362.27	3362.27	0	1.5	109	Specific	291.9	209.81	209.81	6.32	11	>sp|P16422|EPCAM_HUMAN Epithelial cell adhesion molecule OS=Homo sapiens GN=EPCAM PE=1 SV=2	5349	cacoP7gpep1.18300.18300.3	controllerType=0 controllerNumber=1 scan=18300	69.8297
20842:3	40	K.Q[-17.027]C[+57.021]N[+1378.476]GTSMC[+57.021]WC[+57.021]VNTAGVR.R	HexNAc(2)Hex(6)Fuc(0)NeuAc(0)	C[+57]*3, N[+1378], Q[-17]	1121.43	3	3362.28	3362.27	0	2.9	109	Specific	389.71	308.04	308.04	6.9	11	>sp|P16422|EPCAM_HUMAN Epithelial cell adhesion molecule OS=Homo sapiens GN=EPCAM PE=1 SV=2	5349	cacoP7gpep1.18324.18324.3	controllerType=0 controllerNumber=1 scan=18324	69.9321
22071:3	42	R.TDC[+57.021]DSSTTSLC[+57.021]SFPVAN[+1540.529]VSLTK.G	HexNAc(2)Hex(7)Fuc(0)NeuAc(0)	C[+57]*2, N[+1541]	1310.88	3	3930.64	3930.61	0	6.7	72	Specific	439.22	379.97	379.97	7.35	4	>sp|Q96G97|BSCL2_HUMAN Seipin OS=Homo sapiens GN=BSCL2 PE=1 SV=3	1801	cacoP7gpep1.19708.19708.3	controllerType=0 controllerNumber=1 scan=19708	75.9213
22107:3	42	R.TDC[+57.021]DSSTTSLC[+57.021]SFPVAN[+1378.476]VSLTK.G	HexNAc(2)Hex(6)Fuc(0)NeuAc(0)	C[+57]*2, N[+1378]	1256.87	3	3768.59	3768.56	0	7.6	72	Specific	484.23	399.83	399.83	8.94	4	>sp|Q96G97|BSCL2_HUMAN Seipin OS=Homo sapiens GN=BSCL2 PE=1 SV=3	1801	cacoP7gpep1.19781.19781.3	controllerType=0 controllerNumber=1 scan=19781	76.2119
22108:3	42	R.TDC[+57.021]DSSTTSLC[+57.021]SFPVAN[+1378.476]VSLTK.G	HexNAc(2)Hex(6)Fuc(0)NeuAc(0)	C[+57]*2, N[+1378]	1256.86	3	3768.57	3768.56	0	1.8	72	Specific	539.27	415.59	415.59	9.23	4	>sp|Q96G97|BSCL2_HUMAN Seipin OS=Homo sapiens GN=BSCL2 PE=1 SV=3	1801	cacoP7gpep1.19784.19784.3	controllerType=0 controllerNumber=1 scan=19784	76.2233
22032:3	42	R.TDC[+57.021]DSSTTSLC[+57.021]SFPVAN[+1540.529]VSLTK.G	HexNAc(2)Hex(7)Fuc(0)NeuAc(0)	C[+57]*2, N[+1541]	1310.88	3	3930.63	3930.61	0	5.3	72	Specific	546.18	468.49	468.49	9.27	4	>sp|Q96G97|BSCL2_HUMAN Seipin OS=Homo sapiens GN=BSCL2 PE=1 SV=3	1801	cacoP7gpep1.19659.19659.3	controllerType=0 controllerNumber=1 scan=19659	75.7095
21944:3	42	R.TDC[+57.021]DSSTTSLC[+57.021]SFPVAN[+1702.581]VSLTK.G	HexNAc(2)Hex(8)Fuc(0)NeuAc(0)	C[+57]*2, N[+1703]	1364.89	3	4092.67	4092.67	0	0.2	72	Specific	584.12	479.56	479.56	10.64	4	>sp|Q96G97|BSCL2_HUMAN Seipin OS=Homo sapiens GN=BSCL2 PE=1 SV=3	1801	cacoP7gpep1.19550.19550.3	controllerType=0 controllerNumber=1 scan=19550	75.2657
21930:3	42	R.TDC[+57.021]DSSTTSLC[+57.021]SFPVAN[+1864.634]VSLTK.G	HexNAc(2)Hex(9)Fuc(0)NeuAc(0)	C[+57]*2, N[+1865]	1418.92	3	4254.75	4254.72	0	7.5	72	Specific	662.13	527.19	527.19	12.57	4	>sp|Q96G97|BSCL2_HUMAN Seipin OS=Homo sapiens GN=BSCL2 PE=1 SV=3	1801	cacoP7gpep1.19533.19533.3	controllerType=0 controllerNumber=1 scan=19533	75.1944
21956:3	42	R.TDC[+57.021]DSSTTSLC[+57.021]SFPVAN[+1702.581]VSLTK.G	HexNAc(2)Hex(8)Fuc(0)NeuAc(0)	C[+57]*2, N[+1703]	1364.9	3	4092.68	4092.67	0	3.4	72	Specific	790.27	665.06	665.06	14.68	4	>sp|Q96G97|BSCL2_HUMAN Seipin OS=Homo sapiens GN=BSCL2 PE=1 SV=3	1801	cacoP7gpep1.19572.19572.3	controllerType=0 controllerNumber=1 scan=19572	75.3495
21943:3	42	R.TDC[+57.021]DSSTTSLC[+57.021]SFPVAN[+1864.634]VSLTK.G	HexNAc(2)Hex(9)Fuc(0)NeuAc(0)	C[+57]*2, N[+1865]	1418.92	3	4254.74	4254.72	0	5.9	72	Specific	801.63	667.81	667.81	15.65	4	>sp|Q96G97|BSCL2_HUMAN Seipin OS=Homo sapiens GN=BSCL2 PE=1 SV=3	1801	cacoP7gpep1.19549.19549.3	controllerType=0 controllerNumber=1 scan=19549	75.26
20951:3	45	K.SLVTQYLN[+2774.004]ATGNR.W	HexNAc(6)Hex(6)Fuc(2)NeuAc(1)	N[+2774]	1404.26	3	4210.78	4210.75	0	5.7	417	Specific	235.09	71.95	23.09	4.59	12	>sp|P08195|4F2_HUMAN 4F2 cell-surface antigen heavy chain OS=Homo sapiens GN=SLC3A2 PE=1 SV=3	119	cacoP7gpep1.18441.18441.3	controllerType=0 controllerNumber=1 scan=18441	70.4239
20927:3	45	K.SLVTQYLN[+2262.814]ATGNR.W	HexNAc(5)Hex(5)Fuc(1)NeuAc(1)	N[+2263]	1233.87	3	3699.58	3699.56	0	5.4	417	Specific	274.55	115.87	115.87	5.1	12	>sp|P08195|4F2_HUMAN 4F2 cell-surface antigen heavy chain OS=Homo sapiens GN=SLC3A2 PE=1 SV=3	119	cacoP7gpep1.18420.18420.3	controllerType=0 controllerNumber=1 scan=18420	70.3302
17390:3	45	K.SLVTQYLN[+2482.909]ATGNR.W	HexNAc(6)Hex(6)Fuc(2)NeuAc(0)	N[+2483]	1307.22	3	3919.64	3919.66	0	-4.4	417	Specific	296.74	189.33	189.33	5.1	12	>sp|P08195|4F2_HUMAN 4F2 cell-surface antigen heavy chain OS=Homo sapiens GN=SLC3A2 PE=1 SV=3	119	cacoP7gpep1.15297.15297.3	controllerType=0 controllerNumber=1 scan=15297	55.6966
20900:3	45	K.SLVTQYLN[+2627.947]ATGNR.W	HexNAc(6)Hex(6)Fuc(1)NeuAc(1)	N[+2628]	1355.57	3	4064.7	4064.7	0	2	417	Specific	334.91	132.55	32.62	5.68	12	>sp|P08195|4F2_HUMAN 4F2 cell-surface antigen heavy chain OS=Homo sapiens GN=SLC3A2 PE=1 SV=3	119	cacoP7gpep1.18394.18394.3	controllerType=0 controllerNumber=1 scan=18394	70.2155
20905:3	45	K.SLVTQYLN[+2262.814]ATGNR.W	HexNAc(5)Hex(5)Fuc(1)NeuAc(1)	N[+2263]	1233.87	3	3699.59	3699.56	0	8.1	417	Specific	336.44	145.3	145.3	5.59	12	>sp|P08195|4F2_HUMAN 4F2 cell-surface antigen heavy chain OS=Homo sapiens GN=SLC3A2 PE=1 SV=3	119	cacoP7gpep1.18399.18399.3	controllerType=0 controllerNumber=1 scan=18399	70.2351
17448:3	45	K.SLVTQYLN[+1864.634]ATGNR.W	HexNAc(2)Hex(9)Fuc(0)NeuAc(0)	N[+1865]	1101.14	3	3301.39	3301.38	0	2.3	417	Specific	404.71	98.38	98.38	5.36	12	>sp|P08195|4F2_HUMAN 4F2 cell-surface antigen heavy chain OS=Homo sapiens GN=SLC3A2 PE=1 SV=3	119	cacoP7gpep1.15341.15341.3	controllerType=0 controllerNumber=1 scan=15341	55.9193
17307:3	45	K.SLVTQYLN[+2627.947]ATGNR.W	HexNAc(6)Hex(6)Fuc(1)NeuAc(1)	N[+2628]	1355.9	3	4065.69	4064.7	1	-3.4	417	Specific	404.83	189.75	37.8	5.38	12	>sp|P08195|4F2_HUMAN 4F2 cell-surface antigen heavy chain OS=Homo sapiens GN=SLC3A2 PE=1 SV=3	119	cacoP7gpep1.15229.15229.3	controllerType=0 controllerNumber=1 scan=15229	55.3613
17340:3	45	K.SLVTQYLN[+2482.909]ATGNR.W	HexNAc(6)Hex(6)Fuc(2)NeuAc(0)	N[+2483]	1307.23	3	3919.66	3919.66	0	1.3	417	Specific	406.74	194.15	194.15	6	12	>sp|P08195|4F2_HUMAN 4F2 cell-surface antigen heavy chain OS=Homo sapiens GN=SLC3A2 PE=1 SV=3	119	cacoP7gpep1.15257.15257.3	controllerType=0 controllerNumber=1 scan=15257	55.5008
17507:3	45	K.SLVTQYLN[+1702.581]ATGNR.W	HexNAc(2)Hex(8)Fuc(0)NeuAc(0)	N[+1703]	1047.12	3	3139.34	3139.33	0	2.1	417	Specific	433.41	253.55	253.55	6.15	12	>sp|P08195|4F2_HUMAN 4F2 cell-surface antigen heavy chain OS=Homo sapiens GN=SLC3A2 PE=1 SV=3	119	cacoP7gpep1.15387.15387.3	controllerType=0 controllerNumber=1 scan=15387	56.1488
17363:3	45	K.SLVTQYLN[+2336.851]ATGNR.W	HexNAc(6)Hex(6)Fuc(1)NeuAc(0)	N[+2337]	1258.54	3	3773.61	3773.6	0	3.3	417	Specific	464.28	270.31	270.31	6.32	12	>sp|P08195|4F2_HUMAN 4F2 cell-surface antigen heavy chain OS=Homo sapiens GN=SLC3A2 PE=1 SV=3	119	cacoP7gpep1.15277.15277.3	controllerType=0 controllerNumber=1 scan=15277	55.5982
17416:3	45	K.SLVTQYLN[+2026.687]ATGNR.W	HexNAc(2)Hex(10)Fuc(0)NeuAc(0)	N[+2027]	1155.15	3	3463.45	3463.44	0	2.6	417	Specific	555.11	378	378	7.31	12	>sp|P08195|4F2_HUMAN 4F2 cell-surface antigen heavy chain OS=Homo sapiens GN=SLC3A2 PE=1 SV=3	119	cacoP7gpep1.15317.15317.3	controllerType=0 controllerNumber=1 scan=15317	55.7969
05271:2	47	R.SAN[+1702.581]ASFNIK.W	HexNAc(2)Hex(8)Fuc(0)NeuAc(0)	N[+1703]	1327.55	2	2654.08	2654.07	0	4.9	114	Specific	431.16	241.18	241.18	6.25	16	>sp|Q13308|PTK7_HUMAN Inactive tyrosine-protein kinase 7 OS=Homo sapiens GN=PTK7 PE=1 SV=2	13836	cacoP7gpep1.5948.5948.2	controllerType=0 controllerNumber=1 scan=5948	20.4743
03602:3	47	R.DGTPLSDGQSN[+1702.581]HTVSSK.E	HexNAc(2)Hex(8)Fuc(0)NeuAc(0)	N[+1703]	1144.8	3	3432.38	3432.38	0	0.7	165	Specific	372.77	314.82	314.82	6.94	16	>sp|Q13308|PTK7_HUMAN Inactive tyrosine-protein kinase 7 OS=Homo sapiens GN=PTK7 PE=1 SV=2	13836	cacoP7gpep1.4718.4718.3	controllerType=0 controllerNumber=1 scan=4718	17.0516
03551:3	47	R.DGTPLSDGQSN[+1702.581]HTVSSK.E	HexNAc(2)Hex(8)Fuc(0)NeuAc(0)	N[+1703]	1144.8	3	3432.39	3432.38	0	2.4	165	Specific	457.6	323.98	323.98	7.41	16	>sp|Q13308|PTK7_HUMAN Inactive tyrosine-protein kinase 7 OS=Homo sapiens GN=PTK7 PE=1 SV=2	13836	cacoP7gpep1.4681.4681.3	controllerType=0 controllerNumber=1 scan=4681	16.9592
16021:3	47	R.DDAGN[+2116.756]YTC[+57.021]IASNGPQGQIR.A	HexNAc(5)Hex(5)Fuc(0)NeuAc(1)	C[+57], N[+2117]	1385.24	3	4153.69	4153.67	0	6.8	563	Specific	167.39	86.4	26.2	3.04	16	>sp|Q13308|PTK7_HUMAN Inactive tyrosine-protein kinase 7 OS=Homo sapiens GN=PTK7 PE=1 SV=2	13836	cacoP7gpep1.14256.14256.2	controllerType=0 controllerNumber=1 scan=14256	50.5002
16054:3	47	R.DDAGN[+2263.835]YTC[+57.021]IASNGPQGQIR.A	HexNAc(5)Hex(5)Fuc(3)NeuAc(0)	C[+57], N[+2264]	1433.93	3	4299.78	4300.74	-1	9.7	563	Specific	366.29	304.52	304.52	6.18	16	>sp|Q13308|PTK7_HUMAN Inactive tyrosine-protein kinase 7 OS=Homo sapiens GN=PTK7 PE=1 SV=2	13836	cacoP7gpep1.14283.14283.3	controllerType=0 controllerNumber=1 scan=14283	50.6349
18942:4	47	R.DDAGN[+2262.814]YTC[+57.021]IASNGPQGQIR.A	HexNAc(5)Hex(5)Fuc(1)NeuAc(1)	C[+57], N[+2263]	1075.69	4	4299.74	4299.72	0	3.7	563	Specific	406.98	323.74	20.1	6.41	16	>sp|Q13308|PTK7_HUMAN Inactive tyrosine-protein kinase 7 OS=Homo sapiens GN=PTK7 PE=1 SV=2	13836	cacoP7gpep1.16509.16509.4	controllerType=0 controllerNumber=1 scan=16509	61.7536
16025:3	47	R.DDAGN[+2262.814]YTC[+57.021]IASNGPQGQIR.A	HexNAc(5)Hex(5)Fuc(1)NeuAc(1)	C[+57], N[+2263]	1434.26	3	4300.76	4299.72	1	7.8	563	Specific	427.38	333.77	14.46	6.86	16	>sp|Q13308|PTK7_HUMAN Inactive tyrosine-protein kinase 7 OS=Homo sapiens GN=PTK7 PE=1 SV=2	13836	cacoP7gpep1.14261.14261.3	controllerType=0 controllerNumber=1 scan=14261	50.5234
16203:3	47	R.DDAGN[+1971.719]YTC[+57.021]IASNGPQGQIR.A	HexNAc(5)Hex(5)Fuc(1)NeuAc(0)	C[+57], N[+1972]	1336.55	3	4007.65	4008.63	-1	5.3	563	Specific	441.65	345.36	345.36	7.26	16	>sp|Q13308|PTK7_HUMAN Inactive tyrosine-protein kinase 7 OS=Homo sapiens GN=PTK7 PE=1 SV=2	13836	cacoP7gpep1.14394.14394.3	controllerType=0 controllerNumber=1 scan=14394	51.1866
16185:3	47	R.DDAGN[+2116.756]YTC[+57.021]IASNGPQGQIR.A	HexNAc(5)Hex(5)Fuc(0)NeuAc(1)	C[+57], N[+2117]	1385.57	3	4154.69	4153.67	1	6.2	563	Specific	449.58	355.5	19.86	7.15	16	>sp|Q13308|PTK7_HUMAN Inactive tyrosine-protein kinase 7 OS=Homo sapiens GN=PTK7 PE=1 SV=2	13836	cacoP7gpep1.14381.14381.3	controllerType=0 controllerNumber=1 scan=14381	51.12
18975:3	47	R.DDAGN[+2262.814]YTC[+57.021]IASNGPQGQIR.A	HexNAc(5)Hex(5)Fuc(1)NeuAc(1)	C[+57], N[+2263]	1433.92	3	4299.75	4299.72	0	5.5	563	Specific	475.36	374.1	22.9	7.32	16	>sp|Q13308|PTK7_HUMAN Inactive tyrosine-protein kinase 7 OS=Homo sapiens GN=PTK7 PE=1 SV=2	13836	cacoP7gpep1.16544.16544.3	controllerType=0 controllerNumber=1 scan=16544	61.9243
16038:3	47	R.DDAGN[+1864.634]YTC[+57.021]IASNGPQGQIR.A	HexNAc(2)Hex(9)Fuc(0)NeuAc(0)	C[+57], N[+1865]	1301.19	3	3901.55	3901.54	0	2.9	563	Specific	500.34	382.54	382.54	8.91	16	>sp|Q13308|PTK7_HUMAN Inactive tyrosine-protein kinase 7 OS=Homo sapiens GN=PTK7 PE=1 SV=2	13836	cacoP7gpep1.14270.14270.3	controllerType=0 controllerNumber=1 scan=14270	50.5683
16101:3	47	R.DDAGN[+1702.581]YTC[+57.021]IASNGPQGQIR.A	HexNAc(2)Hex(8)Fuc(0)NeuAc(0)	C[+57], N[+1703]	1247.17	3	3739.51	3739.49	0	4.4	563	Specific	620.64	456.43	456.43	11.41	16	>sp|Q13308|PTK7_HUMAN Inactive tyrosine-protein kinase 7 OS=Homo sapiens GN=PTK7 PE=1 SV=2	13836	cacoP7gpep1.14320.14320.3	controllerType=0 controllerNumber=1 scan=14320	50.8157
16079:3	47	R.DDAGN[+1864.634]YTC[+57.021]IASNGPQGQIR.A	HexNAc(2)Hex(9)Fuc(0)NeuAc(0)	C[+57], N[+1865]	1301.19	3	3901.56	3901.54	0	3.6	563	Specific	641.68	529.32	529.32	11.39	16	>sp|Q13308|PTK7_HUMAN Inactive tyrosine-protein kinase 7 OS=Homo sapiens GN=PTK7 PE=1 SV=2	13836	cacoP7gpep1.14303.14303.3	controllerType=0 controllerNumber=1 scan=14303	50.7317
09262:3	48	R.IAPASN[+1702.581]VSHTVVLR.P	HexNAc(2)Hex(8)Fuc(0)NeuAc(0)	N[+1703]	1056.15	3	3166.44	3166.41	0	7.7	83	Specific	417.11	279.06	279.06	6.23	7	>sp|P43308|SSRB_HUMAN Translocon-associated protein subunit beta OS=Homo sapiens GN=SSR2 PE=1 SV=1	16542	cacoP7gpep1.8956.8956.3	controllerType=0 controllerNumber=1 scan=8956	28.4908
09170:3	48	R.IAPASN[+1864.634]VSHTVVLR.P	HexNAc(2)Hex(9)Fuc(0)NeuAc(0)	N[+1865]	1110.16	3	3328.47	3328.47	0	-0.2	83	Specific	478.7	329.29	329.29	6.57	7	>sp|P43308|SSRB_HUMAN Translocon-associated protein subunit beta OS=Homo sapiens GN=SSR2 PE=1 SV=1	16542	cacoP7gpep1.8886.8886.3	controllerType=0 controllerNumber=1 scan=8886	28.3005
11380:3	48	R.IAPASN[+1540.529]VSHTVVLRPLK.A	HexNAc(2)Hex(7)Fuc(0)NeuAc(0)	N[+1541]	1114.87	3	3342.6	3342.59	0	1	83	Specific	199.3	199.3	199.3	4.22	7	>sp|P43308|SSRB_HUMAN Translocon-associated protein subunit beta OS=Homo sapiens GN=SSR2 PE=1 SV=1	16542	cacoP7gpep1.10690.10690.3	controllerType=0 controllerNumber=1 scan=10690	34.0863
11374:4	48	R.IAPASN[+1378.476]VSHTVVLRPLK.A	HexNAc(2)Hex(6)Fuc(0)NeuAc(0)	N[+1378]	795.892	4	3180.55	3180.54	0	1.9	83	Specific	208.84	110.24	110.24	4.27	7	>sp|P43308|SSRB_HUMAN Translocon-associated protein subunit beta OS=Homo sapiens GN=SSR2 PE=1 SV=1	16542	cacoP7gpep1.10686.10686.4	controllerType=0 controllerNumber=1 scan=10686	34.0758
11387:3	48	R.IAPASN[+1702.581]VSHTVVLRPLK.A	HexNAc(2)Hex(8)Fuc(0)NeuAc(0)	N[+1703]	1168.89	3	3504.67	3504.65	0	5.6	83	Specific	333.81	299.98	299.98	6.34	7	>sp|P43308|SSRB_HUMAN Translocon-associated protein subunit beta OS=Homo sapiens GN=SSR2 PE=1 SV=1	16542	cacoP7gpep1.10696.10696.3	controllerType=0 controllerNumber=1 scan=10696	34.1086
11368:3	48	R.IAPASN[+1864.634]VSHTVVLRPLK.A	HexNAc(2)Hex(9)Fuc(0)NeuAc(0)	N[+1865]	1222.91	3	3666.73	3666.7	0	8.4	83	Specific	358.65	358.65	358.65	6.19	7	>sp|P43308|SSRB_HUMAN Translocon-associated protein subunit beta OS=Homo sapiens GN=SSR2 PE=1 SV=1	16542	cacoP7gpep1.10681.10681.3	controllerType=0 controllerNumber=1 scan=10681	34.0592
11250:3	48	R.IAPASN[+1378.476]VSHTVVLRPLK.A	HexNAc(2)Hex(6)Fuc(0)NeuAc(0)	N[+1378]	1060.85	3	3180.54	3180.54	0	-0.3	83	Specific	388.14	374.9	374.9	6.69	7	>sp|P43308|SSRB_HUMAN Translocon-associated protein subunit beta OS=Homo sapiens GN=SSR2 PE=1 SV=1	16542	cacoP7gpep1.10585.10585.2	controllerType=0 controllerNumber=1 scan=10585	33.7353
11321:3	48	R.IAPASN[+1864.634]VSHTVVLRPLK.A	HexNAc(2)Hex(9)Fuc(0)NeuAc(0)	N[+1865]	1222.9	3	3666.7	3666.7	0	-0.2	83	Specific	427.41	405.61	405.61	8.11	7	>sp|P43308|SSRB_HUMAN Translocon-associated protein subunit beta OS=Homo sapiens GN=SSR2 PE=1 SV=1	16542	cacoP7gpep1.10648.10648.3	controllerType=0 controllerNumber=1 scan=10648	33.9479
11350:4	48	R.IAPASN[+1540.529]VSHTVVLRPLK.A	HexNAc(2)Hex(7)Fuc(0)NeuAc(0)	N[+1541]	836.406	4	3342.6	3342.59	0	3	83	Specific	448.13	363.02	363.02	7.69	7	>sp|P43308|SSRB_HUMAN Translocon-associated protein subunit beta OS=Homo sapiens GN=SSR2 PE=1 SV=1	16542	cacoP7gpep1.10670.10670.4	controllerType=0 controllerNumber=1 scan=10670	34.0204
11090:3	48	R.IAPASN[+1540.529]VSHTVVLRPLK.A	HexNAc(2)Hex(7)Fuc(0)NeuAc(0)	N[+1541]	1114.88	3	3342.61	3342.59	0	5.7	83	Specific	451.13	451.13	451.13	8.38	7	>sp|P43308|SSRB_HUMAN Translocon-associated protein subunit beta OS=Homo sapiens GN=SSR2 PE=1 SV=1	16542	cacoP7gpep1.10428.10428.3	controllerType=0 controllerNumber=1 scan=10428	33.2901
11320:4	48	R.IAPASN[+1702.581]VSHTVVLRPLK.A	HexNAc(2)Hex(8)Fuc(0)NeuAc(0)	N[+1703]	876.919	4	3504.65	3504.65	0	2.1	83	Specific	451.63	451.63	451.63	8.91	7	>sp|P43308|SSRB_HUMAN Translocon-associated protein subunit beta OS=Homo sapiens GN=SSR2 PE=1 SV=1	16542	cacoP7gpep1.10647.10647.4	controllerType=0 controllerNumber=1 scan=10647	33.9456
11144:3	48	R.IAPASN[+1540.529]VSHTVVLRPLK.A	HexNAc(2)Hex(7)Fuc(0)NeuAc(0)	N[+1541]	1114.88	3	3342.61	3342.59	0	5.5	83	Specific	476.92	476.92	476.92	8.39	7	>sp|P43308|SSRB_HUMAN Translocon-associated protein subunit beta OS=Homo sapiens GN=SSR2 PE=1 SV=1	16542	cacoP7gpep1.10489.10489.3	controllerType=0 controllerNumber=1 scan=10489	33.4365
11290:4	48	R.IAPASN[+1864.634]VSHTVVLRPLK.A	HexNAc(2)Hex(9)Fuc(0)NeuAc(0)	N[+1865]	917.432	4	3666.71	3666.7	0	1.9	83	Specific	501.01	501.01	501.01	9.08	7	>sp|P43308|SSRB_HUMAN Translocon-associated protein subunit beta OS=Homo sapiens GN=SSR2 PE=1 SV=1	16542	cacoP7gpep1.10622.10622.4	controllerType=0 controllerNumber=1 scan=10622	33.8532
11056:3	48	R.IAPASN[+1864.634]VSHTVVLRPLK.A	HexNAc(2)Hex(9)Fuc(0)NeuAc(0)	N[+1865]	1222.91	3	3666.71	3666.7	0	2.5	83	Specific	518.23	511.69	511.69	8.69	7	>sp|P43308|SSRB_HUMAN Translocon-associated protein subunit beta OS=Homo sapiens GN=SSR2 PE=1 SV=1	16542	cacoP7gpep1.10398.10398.3	controllerType=0 controllerNumber=1 scan=10398	33.2012
11096:3	48	R.IAPASN[+1702.581]VSHTVVLRPLK.A	HexNAc(2)Hex(8)Fuc(0)NeuAc(0)	N[+1703]	1168.89	3	3504.65	3504.65	0	0.8	83	Specific	556.39	556.39	556.39	8.75	7	>sp|P43308|SSRB_HUMAN Translocon-associated protein subunit beta OS=Homo sapiens GN=SSR2 PE=1 SV=1	16542	cacoP7gpep1.10436.10436.3	controllerType=0 controllerNumber=1 scan=10436	33.305
11120:4	48	R.IAPASN[+1540.529]VSHTVVLRPLK.A	HexNAc(2)Hex(7)Fuc(0)NeuAc(0)	N[+1541]	836.399	4	3342.57	3342.59	0	-5.6	83	Specific	593.79	593.79	593.79	9.74	7	>sp|P43308|SSRB_HUMAN Translocon-associated protein subunit beta OS=Homo sapiens GN=SSR2 PE=1 SV=1	16542	cacoP7gpep1.10457.10457.4	controllerType=0 controllerNumber=1 scan=10457	33.3581
11055:4	48	R.IAPASN[+1864.634]VSHTVVLRPLK.A	HexNAc(2)Hex(9)Fuc(0)NeuAc(0)	N[+1865]	917.432	4	3666.71	3666.7	0	1.7	83	Specific	597.95	597.95	597.95	10.67	7	>sp|P43308|SSRB_HUMAN Translocon-associated protein subunit beta OS=Homo sapiens GN=SSR2 PE=1 SV=1	16542	cacoP7gpep1.10397.10397.4	controllerType=0 controllerNumber=1 scan=10397	33.1989
11092:4	48	R.IAPASN[+1702.581]VSHTVVLRPLK.A	HexNAc(2)Hex(8)Fuc(0)NeuAc(0)	N[+1703]	876.918	4	3504.65	3504.65	0	1.3	83	Specific	609.62	609.62	609.62	11.67	7	>sp|P43308|SSRB_HUMAN Translocon-associated protein subunit beta OS=Homo sapiens GN=SSR2 PE=1 SV=1	16542	cacoP7gpep1.10431.10431.4	controllerType=0 controllerNumber=1 scan=10431	33.2967
11124:4	48	R.IAPASN[+1540.529]VSHTVVLRPLK.A	HexNAc(2)Hex(7)Fuc(0)NeuAc(0)	N[+1541]	836.404	4	3342.59	3342.59	0	0	83	Specific	683.5	683.5	683.5	12.42	7	>sp|P43308|SSRB_HUMAN Translocon-associated protein subunit beta OS=Homo sapiens GN=SSR2 PE=1 SV=1	16542	cacoP7gpep1.10462.10462.4	controllerType=0 controllerNumber=1 scan=10462	33.3708
09822:3	50	K.ILGDKVN[+1540.529]NTAVIEK.Q	HexNAc(2)Hex(7)Fuc(0)NeuAc(0)	N[+1541]	1018.8	3	3054.39	3054.39	0	0.9	545	Specific	388.49	223.44	223.44	6.19	5	>sp|Q9H330|TM245_HUMAN Transmembrane protein 245 OS=Homo sapiens GN=TMEM245 PE=1 SV=2	17657	cacoP7gpep1.9381.9381.3	controllerType=0 controllerNumber=1 scan=9381	29.7781
09832:3	50	K.ILGDKVN[+1540.529]NTAVIEK.Q	HexNAc(2)Hex(7)Fuc(0)NeuAc(0)	N[+1541]	1018.81	3	3054.4	3054.39	0	5.2	545	Specific	459.27	348.12	348.12	6.94	5	>sp|Q9H330|TM245_HUMAN Transmembrane protein 245 OS=Homo sapiens GN=TMEM245 PE=1 SV=2	17657	cacoP7gpep1.9391.9391.3	controllerType=0 controllerNumber=1 scan=9391	29.8145
09684:3	50	K.ILGDKVN[+1702.581]NTAVIEK.Q	HexNAc(2)Hex(8)Fuc(0)NeuAc(0)	N[+1703]	1072.82	3	3216.45	3216.44	0	2.3	545	Specific	491.14	315.83	315.83	6.97	5	>sp|Q9H330|TM245_HUMAN Transmembrane protein 245 OS=Homo sapiens GN=TMEM245 PE=1 SV=2	17657	cacoP7gpep1.9281.9281.3	controllerType=0 controllerNumber=1 scan=9281	29.433
09664:3	50	K.ILGDKVN[+1864.634]NTAVIEK.Q	HexNAc(2)Hex(9)Fuc(0)NeuAc(0)	N[+1865]	1126.84	3	3378.5	3378.49	0	1.8	545	Specific	700.27	512.56	512.56	13.17	5	>sp|Q9H330|TM245_HUMAN Transmembrane protein 245 OS=Homo sapiens GN=TMEM245 PE=1 SV=2	17657	cacoP7gpep1.9267.9267.3	controllerType=0 controllerNumber=1 scan=9267	29.3881
13896:3	51	K.KN[+1702.581]QSIGLIQPFATNGK.L	HexNAc(2)Hex(8)Fuc(0)NeuAc(0)	N[+1703]	1140.19	3	3418.54	3418.53	0	4.9	144	Specific	337.8	191.23	191.23	6.71	8	>sp|Q9UIQ6|LCAP_HUMAN Leucyl-cystinyl aminopeptidase OS=Homo sapiens GN=LNPEP PE=1 SV=3	9286	cacoP7gpep1.12592.12592.3	controllerType=0 controllerNumber=1 scan=12592	42.2007
13717:3	51	K.KN[+1864.634]QSIGLIQPFATNGK.L	HexNAc(2)Hex(9)Fuc(0)NeuAc(0)	N[+1865]	1194.2	3	3580.59	3580.58	0	2.9	144	Specific	492.31	323.04	323.04	7.54	8	>sp|Q9UIQ6|LCAP_HUMAN Leucyl-cystinyl aminopeptidase OS=Homo sapiens GN=LNPEP PE=1 SV=3	9286	cacoP7gpep1.12465.12465.3	controllerType=0 controllerNumber=1 scan=12465	41.5927
13760:3	51	K.KN[+1864.634]QSIGLIQPFATNGK.L	HexNAc(2)Hex(9)Fuc(0)NeuAc(0)	N[+1865]	1194.2	3	3580.6	3580.58	0	4.9	144	Specific	565.48	405.91	405.91	9.39	8	>sp|Q9UIQ6|LCAP_HUMAN Leucyl-cystinyl aminopeptidase OS=Homo sapiens GN=LNPEP PE=1 SV=3	9286	cacoP7gpep1.12493.12493.3	controllerType=0 controllerNumber=1 scan=12493	41.7246
13890:3	51	K.KN[+1540.529]QSIGLIQPFATNGK.L	HexNAc(2)Hex(7)Fuc(0)NeuAc(0)	N[+1541]	1086.17	3	3256.49	3256.47	0	5.7	144	Specific	581.11	355.19	355.19	9.15	8	>sp|Q9UIQ6|LCAP_HUMAN Leucyl-cystinyl aminopeptidase OS=Homo sapiens GN=LNPEP PE=1 SV=3	9286	cacoP7gpep1.12589.12589.3	controllerType=0 controllerNumber=1 scan=12589	42.1847
13806:3	51	K.KN[+1702.581]QSIGLIQPFATNGK.L	HexNAc(2)Hex(8)Fuc(0)NeuAc(0)	N[+1703]	1140.19	3	3418.54	3418.53	0	4.5	144	Specific	751.89	563.39	563.39	14.66	8	>sp|Q9UIQ6|LCAP_HUMAN Leucyl-cystinyl aminopeptidase OS=Homo sapiens GN=LNPEP PE=1 SV=3	9286	cacoP7gpep1.12525.12525.3	controllerType=0 controllerNumber=1 scan=12525	41.8747
17845:3	51	K.N[+1540.529]QSIGLIQPFATNGK.L	HexNAc(2)Hex(7)Fuc(0)NeuAc(0)	N[+1541]	1043.47	3	3128.39	3128.38	0	3.2	145	Specific	337.31	194.29	194.29	5.92	8	>sp|Q9UIQ6|LCAP_HUMAN Leucyl-cystinyl aminopeptidase OS=Homo sapiens GN=LNPEP PE=1 SV=3	9286	cacoP7gpep1.15648.15648.3	controllerType=0 controllerNumber=1 scan=15648	57.4587
17660:3	51	K.N[+1864.634]QSIGLIQPFATNGK.L	HexNAc(2)Hex(9)Fuc(0)NeuAc(0)	N[+1865]	1151.5	3	3452.49	3452.48	0	1.4	145	Specific	398.41	373.57	373.57	6.65	8	>sp|Q9UIQ6|LCAP_HUMAN Leucyl-cystinyl aminopeptidase OS=Homo sapiens GN=LNPEP PE=1 SV=3	9286	cacoP7gpep1.15509.15509.3	controllerType=0 controllerNumber=1 scan=15509	56.7588
17728:3	51	K.N[+1702.581]QSIGLIQPFATNGK.L	HexNAc(2)Hex(8)Fuc(0)NeuAc(0)	N[+1703]	1097.48	3	3290.44	3290.43	0	2.9	145	Specific	511.47	360.32	360.32	7.1	8	>sp|Q9UIQ6|LCAP_HUMAN Leucyl-cystinyl aminopeptidase OS=Homo sapiens GN=LNPEP PE=1 SV=3	9286	cacoP7gpep1.15557.15557.3	controllerType=0 controllerNumber=1 scan=15557	56.9998
14935:3	52	K.QPVSPVIHPPVSYN[+1702.581]DTAPR.I	HexNAc(2)Hex(8)Fuc(0)NeuAc(0)	N[+1703]	1259.55	3	3776.64	3776.65	0	-3.5	248	Specific	207.75	156.76	156.76	2.48	6	>sp|Q15904|VAS1_HUMAN V-type proton ATPase subunit S1 OS=Homo sapiens GN=ATP6AP1 PE=1 SV=2	18785	cacoP7gpep1.13417.13417.3	controllerType=0 controllerNumber=1 scan=13417	46.3287
15028:3	52	K.QPVSPVIHPPVSYN[+1864.634]DTAPR.I	HexNAc(2)Hex(9)Fuc(0)NeuAc(0)	N[+1865]	1313.58	3	3938.72	3938.71	0	3.7	248	Specific	423	344.69	344.69	6.18	6	>sp|Q15904|VAS1_HUMAN V-type proton ATPase subunit S1 OS=Homo sapiens GN=ATP6AP1 PE=1 SV=2	18785	cacoP7gpep1.13488.13488.3	controllerType=0 controllerNumber=1 scan=13488	46.6861
15036:3	52	K.QPVSPVIHPPVSYN[+1702.581]DTAPR.I	HexNAc(2)Hex(8)Fuc(0)NeuAc(0)	N[+1703]	1259.56	3	3776.66	3776.65	0	2.8	248	Specific	439.75	356.43	356.43	6.29	6	>sp|Q15904|VAS1_HUMAN V-type proton ATPase subunit S1 OS=Homo sapiens GN=ATP6AP1 PE=1 SV=2	18785	cacoP7gpep1.13494.13494.3	controllerType=0 controllerNumber=1 scan=13494	46.7143
19236:3	52	K.Q[-17.027]PVSPVIHPPVSYN[+1864.634]DTAPR.I	HexNAc(2)Hex(9)Fuc(0)NeuAc(0)	N[+1865], Q[-17]	1307.89	3	3921.67	3921.68	0	-2.8	248	Specific	343.44	268.72	268.72	6.16	6	>sp|Q15904|VAS1_HUMAN V-type proton ATPase subunit S1 OS=Homo sapiens GN=ATP6AP1 PE=1 SV=2	18785	cacoP7gpep1.16777.16777.3	controllerType=0 controllerNumber=1 scan=16777	63.0022
19291:3	52	K.Q[-17.027]PVSPVIHPPVSYN[+1702.581]DTAPR.I	HexNAc(2)Hex(8)Fuc(0)NeuAc(0)	N[+1703], Q[-17]	1253.89	3	3759.65	3759.63	0	7.5	248	Specific	401.99	293.44	293.44	6.77	6	>sp|Q15904|VAS1_HUMAN V-type proton ATPase subunit S1 OS=Homo sapiens GN=ATP6AP1 PE=1 SV=2	18785	cacoP7gpep1.16844.16844.3	controllerType=0 controllerNumber=1 scan=16844	63.2747
19342:3	52	K.Q[-17.027]PVSPVIHPPVSYN[+2026.687]DTAPR.I	HexNAc(2)Hex(10)Fuc(0)NeuAc(0)	N[+2027], Q[-17]	1361.92	3	4083.74	4083.73	0	0.9	248	Specific	416.23	353.25	353.25	7.17	6	>sp|Q15904|VAS1_HUMAN V-type proton ATPase subunit S1 OS=Homo sapiens GN=ATP6AP1 PE=1 SV=2	18785	cacoP7gpep1.16894.16894.3	controllerType=0 controllerNumber=1 scan=16894	63.5041
19280:3	52	K.Q[-17.027]PVSPVIHPPVSYN[+1864.634]DTAPR.I	HexNAc(2)Hex(9)Fuc(0)NeuAc(0)	N[+1865], Q[-17]	1307.91	3	3921.71	3921.68	0	7.9	248	Specific	435.61	395.29	395.29	8.69	6	>sp|Q15904|VAS1_HUMAN V-type proton ATPase subunit S1 OS=Homo sapiens GN=ATP6AP1 PE=1 SV=2	18785	cacoP7gpep1.16829.16829.3	controllerType=0 controllerNumber=1 scan=16829	63.2122
19359:3	52	K.Q[-17.027]PVSPVIHPPVSYN[+2026.687]DTAPR.I	HexNAc(2)Hex(10)Fuc(0)NeuAc(0)	N[+2027], Q[-17]	1361.92	3	4083.76	4083.73	0	6.1	248	Specific	442.91	405.51	405.51	8.85	6	>sp|Q15904|VAS1_HUMAN V-type proton ATPase subunit S1 OS=Homo sapiens GN=ATP6AP1 PE=1 SV=2	18785	cacoP7gpep1.16909.16909.3	controllerType=0 controllerNumber=1 scan=16909	63.5816
19404:3	52	K.Q[-17.027]PVSPVIHPPVSYN[+1864.634]DTAPR.I	HexNAc(2)Hex(9)Fuc(0)NeuAc(0)	N[+1865], Q[-17]	1307.9	3	3921.7	3921.68	0	4.8	248	Specific	586.63	511.52	511.52	10.66	6	>sp|Q15904|VAS1_HUMAN V-type proton ATPase subunit S1 OS=Homo sapiens GN=ATP6AP1 PE=1 SV=2	18785	cacoP7gpep1.16946.16946.3	controllerType=0 controllerNumber=1 scan=16946	63.7592
19450:3	52	K.Q[-17.027]PVSPVIHPPVSYN[+1702.581]DTAPR.I	HexNAc(2)Hex(8)Fuc(0)NeuAc(0)	N[+1703], Q[-17]	1253.88	3	3759.64	3759.63	0	3.3	248	Specific	598.37	450.96	450.96	10.64	6	>sp|Q15904|VAS1_HUMAN V-type proton ATPase subunit S1 OS=Homo sapiens GN=ATP6AP1 PE=1 SV=2	18785	cacoP7gpep1.16981.16981.3	controllerType=0 controllerNumber=1 scan=16981	63.9185
19447:3	52	K.Q[-17.027]PVSPVIHPPVSYN[+1540.529]DTAPR.I	HexNAc(2)Hex(7)Fuc(0)NeuAc(0)	N[+1541], Q[-17]	1199.87	3	3597.59	3597.57	0	3.4	248	Specific	626.34	599.23	599.23	11.64	6	>sp|Q15904|VAS1_HUMAN V-type proton ATPase subunit S1 OS=Homo sapiens GN=ATP6AP1 PE=1 SV=2	18785	cacoP7gpep1.16978.16978.3	controllerType=0 controllerNumber=1 scan=16978	63.9064
06413:3	53	R.GYYN[+1540.529]QSEDGSHTIQR.M	HexNAc(2)Hex(7)Fuc(0)NeuAc(0)	N[+1541]	1099.11	3	3295.31	3295.3	0	3.6	107	Specific	340.92	247.1	247.1	6.17	4	>sp|P30450|1A26_HUMAN HLA class I histocompatibility antigen, A-26 alpha chain OS=Homo sapiens GN=HLA-A PE=1 SV=2	17	cacoP7gpep1.6760.6760.3	controllerType=0 controllerNumber=1 scan=6760	22.4565
06134:3	53	R.GYYN[+1864.634]QSEDGSHTIQR.M	HexNAc(2)Hex(9)Fuc(0)NeuAc(0)	N[+1865]	1207.15	3	3619.42	3619.41	0	4.6	107	Specific	404.46	291.72	291.72	6.38	4	>sp|P30450|1A26_HUMAN HLA class I histocompatibility antigen, A-26 alpha chain OS=Homo sapiens GN=HLA-A PE=1 SV=2	17	cacoP7gpep1.6564.6564.3	controllerType=0 controllerNumber=1 scan=6564	21.9805
06260:3	53	R.GYYN[+1702.581]QSEDGSHTIQR.M	HexNAc(2)Hex(8)Fuc(0)NeuAc(0)	N[+1703]	1153.13	3	3457.36	3457.35	0	3	107	Specific	710.83	578.2	578.2	13.23	4	>sp|P30450|1A26_HUMAN HLA class I histocompatibility antigen, A-26 alpha chain OS=Homo sapiens GN=HLA-A PE=1 SV=2	17	cacoP7gpep1.6658.6658.3	controllerType=0 controllerNumber=1 scan=6658	22.211
06200:3	53	R.GYYN[+1864.634]QSEDGSHTIQR.M	HexNAc(2)Hex(9)Fuc(0)NeuAc(0)	N[+1865]	1207.15	3	3619.42	3619.41	0	4.5	107	Specific	743.56	606.12	606.12	13.14	4	>sp|P30450|1A26_HUMAN HLA class I histocompatibility antigen, A-26 alpha chain OS=Homo sapiens GN=HLA-A PE=1 SV=2	17	cacoP7gpep1.6614.6614.3	controllerType=0 controllerNumber=1 scan=6614	22.1032
06250:3	53	R.GYYN[+2026.687]QSEDGSHTIQR.M	HexNAc(2)Hex(10)Fuc(0)NeuAc(0)	N[+2027]	1261.16	3	3781.48	3781.46	0	4.6	107	Specific	778.39	623.13	623.13	14.14	4	>sp|P30450|1A26_HUMAN HLA class I histocompatibility antigen, A-26 alpha chain OS=Homo sapiens GN=HLA-A PE=1 SV=2	17	cacoP7gpep1.6649.6649.3	controllerType=0 controllerNumber=1 scan=6649	22.1846
12001:3	55	K.LVGGPVAGGDPN[+1378.476]QTIR.G	HexNAc(2)Hex(6)Fuc(0)NeuAc(0)	N[+1378]	977.11	3	2929.32	2929.3	0	3.7	84	Specific	208.17	115.81	115.81	2.79	10	>sp|O15230|LAMA5_HUMAN Laminin subunit alpha-5 OS=Homo sapiens GN=LAMA5 PE=1 SV=8	9229	cacoP7gpep1.11157.11157.3	controllerType=0 controllerNumber=1 scan=11157	35.851
11785:2	55	K.LVGGPVAGGDPN[+1702.581]QTIR.G	HexNAc(2)Hex(8)Fuc(0)NeuAc(0)	N[+1703]	1627.2	2	3253.39	3253.41	0	-7	84	Specific	297.17	75.85	75.85	3.31	10	>sp|O15230|LAMA5_HUMAN Laminin subunit alpha-5 OS=Homo sapiens GN=LAMA5 PE=1 SV=8	9229	cacoP7gpep1.10992.10992.2	controllerType=0 controllerNumber=1 scan=10992	35.2
11786:3	55	K.LVGGPVAGGDPN[+1702.581]QTIR.G	HexNAc(2)Hex(8)Fuc(0)NeuAc(0)	N[+1703]	1085.15	3	3253.42	3253.41	0	3.6	84	Specific	503.03	237.84	237.84	6.86	10	>sp|O15230|LAMA5_HUMAN Laminin subunit alpha-5 OS=Homo sapiens GN=LAMA5 PE=1 SV=8	9229	cacoP7gpep1.10994.10994.3	controllerType=0 controllerNumber=1 scan=10994	35.2065
19146:3	55	R.LN[+1864.634]ASIADLQSQLR.S	HexNAc(2)Hex(9)Fuc(0)NeuAc(0)	N[+1865]	1098.48	3	3293.42	3293.41	0	0.3	2208	Specific	232.32	96	96	4.77	10	>sp|O15230|LAMA5_HUMAN Laminin subunit alpha-5 OS=Homo sapiens GN=LAMA5 PE=1 SV=8	9229	cacoP7gpep1.16691.16691.3	controllerType=0 controllerNumber=1 scan=16691	62.63
19282:3	55	R.LN[+1540.529]ASIADLQSQLR.S	HexNAc(2)Hex(7)Fuc(0)NeuAc(0)	N[+1541]	990.445	3	2969.32	2969.31	0	3.8	2208	Specific	307.64	274.88	274.88	5.89	10	>sp|O15230|LAMA5_HUMAN Laminin subunit alpha-5 OS=Homo sapiens GN=LAMA5 PE=1 SV=8	9229	cacoP7gpep1.16830.16830.3	controllerType=0 controllerNumber=1 scan=16830	63.2178
19185:3	55	R.LN[+1702.581]ASIADLQSQLR.S	HexNAc(2)Hex(8)Fuc(0)NeuAc(0)	N[+1703]	1044.46	3	3131.37	3131.36	0	2.7	2208	Specific	396.35	276.62	276.62	6.22	10	>sp|O15230|LAMA5_HUMAN Laminin subunit alpha-5 OS=Homo sapiens GN=LAMA5 PE=1 SV=8	9229	cacoP7gpep1.16727.16727.3	controllerType=0 controllerNumber=1 scan=16727	62.79
08833:3	55	R.DN[+1864.634]ATLQATLHAAR.D	HexNAc(2)Hex(9)Fuc(0)NeuAc(0)	N[+1865]	1082.79	3	3246.35	3246.35	0	0.6	2422	Specific	298.81	127.95	127.95	5.67	10	>sp|O15230|LAMA5_HUMAN Laminin subunit alpha-5 OS=Homo sapiens GN=LAMA5 PE=1 SV=8	9229	cacoP7gpep1.8619.8619.3	controllerType=0 controllerNumber=1 scan=8619	27.5442
08863:3	55	R.DN[+1702.581]ATLQATLHAAR.D	HexNAc(2)Hex(8)Fuc(0)NeuAc(0)	N[+1703]	1028.77	3	3084.3	3084.3	0	1.2	2422	Specific	343.69	218.95	218.95	6.22	10	>sp|O15230|LAMA5_HUMAN Laminin subunit alpha-5 OS=Homo sapiens GN=LAMA5 PE=1 SV=8	9229	cacoP7gpep1.8642.8642.3	controllerType=0 controllerNumber=1 scan=8642	27.6147
19240:3	55	R.LN[+1702.581]TTGVSAGC[+57.021]TADLLVGR.A	HexNAc(2)Hex(8)Fuc(0)NeuAc(0)	C[+57], N[+1703]	1169.84	3	3507.51	3507.5	0	2.7	3106	Specific	304.69	293.04	293.04	6.55	10	>sp|O15230|LAMA5_HUMAN Laminin subunit alpha-5 OS=Homo sapiens GN=LAMA5 PE=1 SV=8	9229	cacoP7gpep1.16780.16780.3	controllerType=0 controllerNumber=1 scan=16780	63.0148
19213:3	55	R.LN[+1864.634]TTGVSAGC[+57.021]TADLLVGR.A	HexNAc(2)Hex(9)Fuc(0)NeuAc(0)	C[+57], N[+1865]	1223.86	3	3669.58	3669.56	0	5.4	3106	Specific	373.97	330.24	330.24	6.77	10	>sp|O15230|LAMA5_HUMAN Laminin subunit alpha-5 OS=Homo sapiens GN=LAMA5 PE=1 SV=8	9229	cacoP7gpep1.16751.16751.3	controllerType=0 controllerNumber=1 scan=16751	62.8969
19230:3	55	R.LN[+1864.634]TTGVSAGC[+57.021]TADLLVGR.A	HexNAc(2)Hex(9)Fuc(0)NeuAc(0)	C[+57], N[+1865]	1223.87	3	3669.58	3669.56	0	7.7	3106	Specific	485.97	442.16	442.16	8.66	10	>sp|O15230|LAMA5_HUMAN Laminin subunit alpha-5 OS=Homo sapiens GN=LAMA5 PE=1 SV=8	9229	cacoP7gpep1.16771.16771.3	controllerType=0 controllerNumber=1 scan=16771	62.9774
01012:3	59	R.GN[+2026.687]VTQHVQGHR.N	HexNAc(2)Hex(10)Fuc(0)NeuAc(0)	N[+2027]	1087.11	3	3259.33	3259.31	0	4.5	76	Specific	285.06	115.14	115.14	4.91	7	>sp|Q15043|S39AE_HUMAN Zinc transporter ZIP14 OS=Homo sapiens GN=SLC39A14 PE=1 SV=3	15298	cacoP7gpep1.2626.2626.3	controllerType=0 controllerNumber=1 scan=2626	10.775
02194:3	59	R.GN[+2775.025]VTQHVQGHR.N	HexNAc(6)Hex(6)Fuc(4)NeuAc(0)	N[+2775]	1336.89	3	4008.65	4007.65	1	-1.6	76	Specific	364.19	129.6	129.6	4.87	7	>sp|Q15043|S39AE_HUMAN Zinc transporter ZIP14 OS=Homo sapiens GN=SLC39A14 PE=1 SV=3	15298	cacoP7gpep1.3596.3596.3	controllerType=0 controllerNumber=1 scan=3596	13.7964
01627:3	59	R.GN[+2482.909]VTQHVQGHR.N	HexNAc(6)Hex(6)Fuc(2)NeuAc(0)	N[+2483]	1239.19	3	3715.54	3715.53	0	2.4	76	Specific	443.47	201.35	201.35	5.97	7	>sp|Q15043|S39AE_HUMAN Zinc transporter ZIP14 OS=Homo sapiens GN=SLC39A14 PE=1 SV=3	15298	cacoP7gpep1.3130.3130.3	controllerType=0 controllerNumber=1 scan=3130	12.3858
01610:3	59	R.GN[+2482.909]VTQHVQGHR.N	HexNAc(6)Hex(6)Fuc(2)NeuAc(0)	N[+2483]	1239.19	3	3715.55	3715.53	0	5.2	76	Specific	452.98	184.6	184.6	5.84	7	>sp|Q15043|S39AE_HUMAN Zinc transporter ZIP14 OS=Homo sapiens GN=SLC39A14 PE=1 SV=3	15298	cacoP7gpep1.3118.3118.3	controllerType=0 controllerNumber=1 scan=3118	12.36
01001:3	59	R.GN[+1702.581]VTQHVQGHR.N	HexNAc(2)Hex(8)Fuc(0)NeuAc(0)	N[+1703]	979.076	3	2935.21	2935.21	0	2.1	76	Specific	483.89	243.57	243.57	6	7	>sp|Q15043|S39AE_HUMAN Zinc transporter ZIP14 OS=Homo sapiens GN=SLC39A14 PE=1 SV=3	15298	cacoP7gpep1.2619.2619.3	controllerType=0 controllerNumber=1 scan=2619	10.7564
01608:3	59	R.GN[+2628.967]VTQHVQGHR.N	HexNAc(6)Hex(6)Fuc(3)NeuAc(0)	N[+2629]	1287.87	3	3861.6	3861.59	0	1.8	76	Specific	545.76	208.98	208.98	6.27	7	>sp|Q15043|S39AE_HUMAN Zinc transporter ZIP14 OS=Homo sapiens GN=SLC39A14 PE=1 SV=3	15298	cacoP7gpep1.3116.3116.3	controllerType=0 controllerNumber=1 scan=3116	12.3514
00980:3	59	R.GN[+1864.634]VTQHVQGHR.N	HexNAc(2)Hex(9)Fuc(0)NeuAc(0)	N[+1865]	1033.09	3	3097.27	3097.26	0	3.3	76	Specific	627.62	350.02	350.02	9.06	7	>sp|Q15043|S39AE_HUMAN Zinc transporter ZIP14 OS=Homo sapiens GN=SLC39A14 PE=1 SV=3	15298	cacoP7gpep1.2603.2603.3	controllerType=0 controllerNumber=1 scan=2603	10.6903
00984:3	59	R.GN[+1864.634]VTQHVQGHR.N	HexNAc(2)Hex(9)Fuc(0)NeuAc(0)	N[+1865]	1033.09	3	3097.26	3097.26	0	2.1	76	Specific	644.4	362.13	362.13	9.25	7	>sp|Q15043|S39AE_HUMAN Zinc transporter ZIP14 OS=Homo sapiens GN=SLC39A14 PE=1 SV=3	15298	cacoP7gpep1.2606.2606.3	controllerType=0 controllerNumber=1 scan=2606	10.7021
18559:4	60	R.N[+1702.581]C[+57.021]SAAPQPEPAAGLASYPELR.L	HexNAc(2)Hex(8)Fuc(0)NeuAc(0)	C[+57], N[+1703]	976.164	4	3901.63	3901.63	0	0.7	87	Specific	254.43	224.68	224.68	5.98	3	>sp|O75718|CRTAP_HUMAN Cartilage-associated protein OS=Homo sapiens GN=CRTAP PE=1 SV=1	3902	cacoP7gpep1.16200.16200.4	controllerType=0 controllerNumber=1 scan=16200	60.2023
18799:3	60	R.N[+1378.476]C[+57.021]SAAPQPEPAAGLASYPELR.L	HexNAc(2)Hex(6)Fuc(0)NeuAc(0)	C[+57], N[+1378]	1193.19	3	3577.55	3577.53	0	5.8	87	Specific	565.94	501.13	501.13	9.38	3	>sp|O75718|CRTAP_HUMAN Cartilage-associated protein OS=Homo sapiens GN=CRTAP PE=1 SV=1	3902	cacoP7gpep1.16390.16390.3	controllerType=0 controllerNumber=1 scan=16390	61.1713
18762:3	60	R.N[+1378.476]C[+57.021]SAAPQPEPAAGLASYPELR.L	HexNAc(2)Hex(6)Fuc(0)NeuAc(0)	C[+57], N[+1378]	1193.18	3	3577.54	3577.53	0	3.8	87	Specific	628.69	585.22	585.22	11.68	3	>sp|O75718|CRTAP_HUMAN Cartilage-associated protein OS=Homo sapiens GN=CRTAP PE=1 SV=1	3902	cacoP7gpep1.16361.16361.3	controllerType=0 controllerNumber=1 scan=16361	61.0239
18708:3	60	R.N[+1540.529]C[+57.021]SAAPQPEPAAGLASYPELR.L	HexNAc(2)Hex(7)Fuc(0)NeuAc(0)	C[+57], N[+1541]	1247.2	3	3739.59	3739.58	0	4.3	87	Specific	648.85	534.74	534.74	11.7	3	>sp|O75718|CRTAP_HUMAN Cartilage-associated protein OS=Homo sapiens GN=CRTAP PE=1 SV=1	3902	cacoP7gpep1.16320.16320.3	controllerType=0 controllerNumber=1 scan=16320	60.8154
18543:3	60	R.N[+1702.581]C[+57.021]SAAPQPEPAAGLASYPELR.L	HexNAc(2)Hex(8)Fuc(0)NeuAc(0)	C[+57], N[+1703]	1301.22	3	3901.65	3901.63	0	5.9	87	Specific	883.15	723.58	723.58	16.65	3	>sp|O75718|CRTAP_HUMAN Cartilage-associated protein OS=Homo sapiens GN=CRTAP PE=1 SV=1	3902	cacoP7gpep1.16189.16189.3	controllerType=0 controllerNumber=1 scan=16189	60.1465
19096:3	61	R.LVQLFPN[+1378.476]DTSLK.N	HexNAc(2)Hex(6)Fuc(0)NeuAc(0)	N[+1378]	918.42	3	2753.25	2753.24	0	3.1	446	Specific	131.22	130.11	130.11	2.02	5	>sp|Q12797|ASPH_HUMAN Aspartyl/asparaginyl beta-hydroxylase OS=Homo sapiens GN=ASPH PE=1 SV=3	1254	cacoP7gpep1.16648.16648.3	controllerType=0 controllerNumber=1 scan=16648	62.4244
19115:3	61	R.LVQLFPN[+1378.476]DTSLK.N	HexNAc(2)Hex(6)Fuc(0)NeuAc(0)	N[+1378]	918.42	3	2753.24	2753.24	0	2.2	446	Specific	175.64	159.45	159.45	2.57	5	>sp|Q12797|ASPH_HUMAN Aspartyl/asparaginyl beta-hydroxylase OS=Homo sapiens GN=ASPH PE=1 SV=3	1254	cacoP7gpep1.16665.16665.3	controllerType=0 controllerNumber=1 scan=16665	62.5047
18824:3	61	R.LVQLFPN[+1864.634]DTSLK.N	HexNAc(2)Hex(9)Fuc(0)NeuAc(0)	N[+1865]	1080.47	3	3239.4	3239.4	0	2.2	446	Specific	285.83	268.76	268.76	5.9	5	>sp|Q12797|ASPH_HUMAN Aspartyl/asparaginyl beta-hydroxylase OS=Homo sapiens GN=ASPH PE=1 SV=3	1254	cacoP7gpep1.16413.16413.3	controllerType=0 controllerNumber=1 scan=16413	61.2848
19101:3	61	R.LVQLFPN[+1540.529]DTSLK.N	HexNAc(2)Hex(7)Fuc(0)NeuAc(0)	N[+1541]	972.436	3	2915.29	2915.29	0	1	446	Specific	310.06	118.96	118.96	5.24	5	>sp|Q12797|ASPH_HUMAN Aspartyl/asparaginyl beta-hydroxylase OS=Homo sapiens GN=ASPH PE=1 SV=3	1254	cacoP7gpep1.16655.16655.3	controllerType=0 controllerNumber=1 scan=16655	62.4544
18984:3	61	R.LVQLFPN[+1540.529]DTSLK.N	HexNAc(2)Hex(7)Fuc(0)NeuAc(0)	N[+1541]	972.438	3	2915.3	2915.29	0	2.6	446	Specific	355.97	207.28	207.28	6.05	5	>sp|Q12797|ASPH_HUMAN Aspartyl/asparaginyl beta-hydroxylase OS=Homo sapiens GN=ASPH PE=1 SV=3	1254	cacoP7gpep1.16551.16551.3	controllerType=0 controllerNumber=1 scan=16551	61.9623
18877:3	61	R.LVQLFPN[+1702.581]DTSLK.N	HexNAc(2)Hex(8)Fuc(0)NeuAc(0)	N[+1703]	1026.46	3	3077.35	3077.34	0	3	446	Specific	418	217.11	217.11	6.11	5	>sp|Q12797|ASPH_HUMAN Aspartyl/asparaginyl beta-hydroxylase OS=Homo sapiens GN=ASPH PE=1 SV=3	1254	cacoP7gpep1.16454.16454.3	controllerType=0 controllerNumber=1 scan=16454	61.4852
18961:3	61	R.LVQLFPN[+1540.529]DTSLK.N	HexNAc(2)Hex(7)Fuc(0)NeuAc(0)	N[+1541]	972.44	3	2915.3	2915.29	0	4.5	446	Specific	537.23	371.87	371.87	7.12	5	>sp|Q12797|ASPH_HUMAN Aspartyl/asparaginyl beta-hydroxylase OS=Homo sapiens GN=ASPH PE=1 SV=3	1254	cacoP7gpep1.16528.16528.3	controllerType=0 controllerNumber=1 scan=16528	61.8497
18930:2	61	R.LVQLFPN[+1702.581]DTSLK.N	HexNAc(2)Hex(8)Fuc(0)NeuAc(0)	N[+1703]	1539.18	2	3077.36	3077.34	0	4.8	446	Specific	605.59	453.06	453.06	11.14	5	>sp|Q12797|ASPH_HUMAN Aspartyl/asparaginyl beta-hydroxylase OS=Homo sapiens GN=ASPH PE=1 SV=3	1254	cacoP7gpep1.16499.16499.2	controllerType=0 controllerNumber=1 scan=16499	61.7073
23364:3	64	K.DYYPIN[+1702.581]ESLASLPLR.V	HexNAc(2)Hex(8)Fuc(0)NeuAc(0)	N[+1703]	1151.84	3	3453.5	3453.48	0	6	290	Specific	424.08	327.28	327.28	6.42	4	>sp|O96005|CLPT1_HUMAN Cleft lip and palate transmembrane protein 1 OS=Homo sapiens GN=CLPTM1 PE=1 SV=1	3347	cacoP7gpep1.23245.23245.3	controllerType=0 controllerNumber=1 scan=23245	90.9031
23393:3	64	K.DYYPIN[+1702.581]ESLASLPLR.V	HexNAc(2)Hex(8)Fuc(0)NeuAc(0)	N[+1703]	1151.84	3	3453.5	3453.48	0	6.1	290	Specific	492.19	413.17	413.17	8.22	4	>sp|O96005|CLPT1_HUMAN Cleft lip and palate transmembrane protein 1 OS=Homo sapiens GN=CLPTM1 PE=1 SV=1	3347	cacoP7gpep1.23388.23388.3	controllerType=0 controllerNumber=1 scan=23388	91.5271
23361:3	64	K.DYYPIN[+1864.634]ESLASLPLR.V	HexNAc(2)Hex(9)Fuc(0)NeuAc(0)	N[+1865]	1205.85	3	3615.55	3615.54	0	2.7	290	Specific	538.94	435.94	435.94	8.51	4	>sp|O96005|CLPT1_HUMAN Cleft lip and palate transmembrane protein 1 OS=Homo sapiens GN=CLPTM1 PE=1 SV=1	3347	cacoP7gpep1.23234.23234.3	controllerType=0 controllerNumber=1 scan=23234	90.8566
17060:4	67	K.TC[+57.021]EEC[+57.021]LKN[+1540.529]VSC[+57.021]LWC[+57.021]NTNK.A	HexNAc(2)Hex(7)Fuc(0)NeuAc(0)	C[+57]*4, N[+1541]	964.888	4	3856.53	3856.52	0	3.8	47	Specific	180.69	134.01	134.01	4.22	4	>sp|P53801|PTTG_HUMAN Pituitary tumor-transforming gene 1 protein-interacting protein OS=Homo sapiens GN=PTTG1IP PE=1 SV=1	13889	cacoP7gpep1.15040.15040.4	controllerType=0 controllerNumber=1 scan=15040	54.418
16990:3	67	K.TC[+57.021]EEC[+57.021]LKN[+1702.581]VSC[+57.021]LWC[+57.021]NTNK.A	HexNAc(2)Hex(8)Fuc(0)NeuAc(0)	C[+57]*4, N[+1703]	1340.2	3	4018.59	4018.57	0	4	47	Specific	736.32	606.19	606.19	13.65	4	>sp|P53801|PTTG_HUMAN Pituitary tumor-transforming gene 1 protein-interacting protein OS=Homo sapiens GN=PTTG1IP PE=1 SV=1	13889	cacoP7gpep1.14989.14989.3	controllerType=0 controllerNumber=1 scan=14989	54.1598
17032:3	67	K.TC[+57.021]EEC[+57.021]LKN[+1540.529]VSC[+57.021]LWC[+57.021]NTNK.A	HexNAc(2)Hex(7)Fuc(0)NeuAc(0)	C[+57]*4, N[+1541]	1286.18	3	3856.53	3856.52	0	3.7	47	Specific	765.01	626.14	626.14	14.65	4	>sp|P53801|PTTG_HUMAN Pituitary tumor-transforming gene 1 protein-interacting protein OS=Homo sapiens GN=PTTG1IP PE=1 SV=1	13889	cacoP7gpep1.15020.15020.3	controllerType=0 controllerNumber=1 scan=15020	54.3171
11518:3	67	K.N[+1702.581]VSC[+57.021]LWC[+57.021]NTNK.A	HexNAc(2)Hex(8)Fuc(0)NeuAc(0)	C[+57]*2, N[+1703]	1033.4	3	3098.2	3098.2	0	0.4	54	Specific	239.67	88.04	88.04	4.63	4	>sp|P53801|PTTG_HUMAN Pituitary tumor-transforming gene 1 protein-interacting protein OS=Homo sapiens GN=PTTG1IP PE=1 SV=1	13889	cacoP7gpep1.10798.10798.3	controllerType=0 controllerNumber=1 scan=10798	34.492
11672:3	67	K.N[+1540.529]VSC[+57.021]LWC[+57.021]NTNK.A	HexNAc(2)Hex(7)Fuc(0)NeuAc(0)	C[+57]*2, N[+1541]	979.388	3	2936.15	2936.14	0	2.1	54	Specific	304.1	179.51	179.51	5.62	4	>sp|P53801|PTTG_HUMAN Pituitary tumor-transforming gene 1 protein-interacting protein OS=Homo sapiens GN=PTTG1IP PE=1 SV=1	13889	cacoP7gpep1.10912.10912.3	controllerType=0 controllerNumber=1 scan=10912	34.8953
11569:3	67	K.N[+1702.581]VSC[+57.021]LWC[+57.021]NTNK.A	HexNAc(2)Hex(8)Fuc(0)NeuAc(0)	C[+57]*2, N[+1703]	1033.4	3	3098.2	3098.2	0	0.5	54	Specific	356.99	194.69	194.69	5.73	4	>sp|P53801|PTTG_HUMAN Pituitary tumor-transforming gene 1 protein-interacting protein OS=Homo sapiens GN=PTTG1IP PE=1 SV=1	13889	cacoP7gpep1.10837.10837.3	controllerType=0 controllerNumber=1 scan=10837	34.625
11616:2	67	K.N[+1702.581]VSC[+57.021]LWC[+57.021]NTNK.A	HexNAc(2)Hex(8)Fuc(0)NeuAc(0)	C[+57]*2, N[+1703]	1549.6	2	3098.2	3098.2	0	1.5	54	Specific	369.48	263.96	263.96	6.2	4	>sp|P53801|PTTG_HUMAN Pituitary tumor-transforming gene 1 protein-interacting protein OS=Homo sapiens GN=PTTG1IP PE=1 SV=1	13889	cacoP7gpep1.10872.10872.2	controllerType=0 controllerNumber=1 scan=10872	34.7489
11682:2	67	K.N[+1540.529]VSC[+57.021]LWC[+57.021]NTNK.A	HexNAc(2)Hex(7)Fuc(0)NeuAc(0)	C[+57]*2, N[+1541]	1468.58	2	2936.15	2936.14	0	2.6	54	Specific	499.67	394.27	394.27	8.47	4	>sp|P53801|PTTG_HUMAN Pituitary tumor-transforming gene 1 protein-interacting protein OS=Homo sapiens GN=PTTG1IP PE=1 SV=1	13889	cacoP7gpep1.10919.10919.2	controllerType=0 controllerNumber=1 scan=10919	34.9263
08058:2	69	R.KIYIPLN[+1702.581]K.T	HexNAc(2)Hex(8)Fuc(0)NeuAc(0)	N[+1703]	1346.11	2	2691.22	2691.2	0	5.5	39	Specific	201.32	169.63	169.63	2.98	11	>sp|Q92542|NICA_HUMAN Nicastrin OS=Homo sapiens GN=NCSTN PE=1 SV=2	11288	cacoP7gpep1.8034.8034.2	controllerType=0 controllerNumber=1 scan=8034	25.8027
07935:3	69	R.KIYIPLN[+2026.687]K.T	HexNAc(2)Hex(10)Fuc(0)NeuAc(0)	N[+2027]	1005.78	3	3015.32	3015.31	0	3.1	39	Specific	285.48	235.17	235.17	5.94	11	>sp|Q92542|NICA_HUMAN Nicastrin OS=Homo sapiens GN=NCSTN PE=1 SV=2	11288	cacoP7gpep1.7941.7941.3	controllerType=0 controllerNumber=1 scan=7941	25.5596
08093:2	69	R.KIYIPLN[+1702.581]K.T	HexNAc(2)Hex(8)Fuc(0)NeuAc(0)	N[+1703]	1346.11	2	2691.21	2691.2	0	3.1	39	Specific	313.47	177.99	177.99	4.59	11	>sp|Q92542|NICA_HUMAN Nicastrin OS=Homo sapiens GN=NCSTN PE=1 SV=2	11288	cacoP7gpep1.8060.8060.2	controllerType=0 controllerNumber=1 scan=8060	25.8842
07956:3	69	R.KIYIPLN[+2026.687]K.T	HexNAc(2)Hex(10)Fuc(0)NeuAc(0)	N[+2027]	1005.78	3	3015.31	3015.31	0	1.6	39	Specific	319.17	296.34	296.34	6.06	11	>sp|Q92542|NICA_HUMAN Nicastrin OS=Homo sapiens GN=NCSTN PE=1 SV=2	11288	cacoP7gpep1.7959.7959.3	controllerType=0 controllerNumber=1 scan=7959	25.6113
07946:3	69	R.KIYIPLN[+2026.687]K.T	HexNAc(2)Hex(10)Fuc(0)NeuAc(0)	N[+2027]	1005.78	3	3015.33	3015.31	0	7.6	39	Specific	336.69	300.02	300.02	5.41	11	>sp|Q92542|NICA_HUMAN Nicastrin OS=Homo sapiens GN=NCSTN PE=1 SV=2	11288	cacoP7gpep1.7950.7950.3	controllerType=0 controllerNumber=1 scan=7950	25.5808
08027:3	69	R.KIYIPLN[+1702.581]K.T	HexNAc(2)Hex(8)Fuc(0)NeuAc(0)	N[+1703]	897.741	3	2691.21	2691.2	0	3.5	39	Specific	345.43	85	85	5.29	11	>sp|Q92542|NICA_HUMAN Nicastrin OS=Homo sapiens GN=NCSTN PE=1 SV=2	11288	cacoP7gpep1.8013.8013.3	controllerType=0 controllerNumber=1 scan=8013	25.7472
08049:3	69	R.KIYIPLN[+1702.581]K.T	HexNAc(2)Hex(8)Fuc(0)NeuAc(0)	N[+1703]	897.74	3	2691.21	2691.2	0	2.3	39	Specific	390.1	142.74	142.74	5.98	11	>sp|Q92542|NICA_HUMAN Nicastrin OS=Homo sapiens GN=NCSTN PE=1 SV=2	11288	cacoP7gpep1.8028.8028.3	controllerType=0 controllerNumber=1 scan=8028	25.7861
07906:3	69	R.KIYIPLN[+1864.634]K.T	HexNAc(2)Hex(9)Fuc(0)NeuAc(0)	N[+1865]	951.757	3	2853.26	2853.25	0	1.1	39	Specific	392.21	136.74	136.74	5.78	11	>sp|Q92542|NICA_HUMAN Nicastrin OS=Homo sapiens GN=NCSTN PE=1 SV=2	11288	cacoP7gpep1.7918.7918.3	controllerType=0 controllerNumber=1 scan=7918	25.5039
08025:3	69	R.KIYIPLN[+1702.581]K.T	HexNAc(2)Hex(8)Fuc(0)NeuAc(0)	N[+1703]	897.741	3	2691.21	2691.2	0	3.5	39	Specific	414.93	384.71	384.71	8	11	>sp|Q92542|NICA_HUMAN Nicastrin OS=Homo sapiens GN=NCSTN PE=1 SV=2	11288	cacoP7gpep1.8012.8012.3	controllerType=0 controllerNumber=1 scan=8012	25.7449
07958:2	69	R.KIYIPLN[+1864.634]K.T	HexNAc(2)Hex(9)Fuc(0)NeuAc(0)	N[+1865]	1427.14	2	2853.27	2853.25	0	4.3	39	Specific	537	221.27	221.27	5.17	11	>sp|Q92542|NICA_HUMAN Nicastrin OS=Homo sapiens GN=NCSTN PE=1 SV=2	11288	cacoP7gpep1.7961.7961.2	controllerType=0 controllerNumber=1 scan=7961	25.6154
08012:2	69	R.KIYIPLN[+1864.634]K.T	HexNAc(2)Hex(9)Fuc(0)NeuAc(0)	N[+1865]	1427.14	2	2853.27	2853.25	0	4.5	39	Specific	575.63	210.14	210.14	6.37	11	>sp|Q92542|NICA_HUMAN Nicastrin OS=Homo sapiens GN=NCSTN PE=1 SV=2	11288	cacoP7gpep1.8002.8002.2	controllerType=0 controllerNumber=1 scan=8002	25.7163
12081:2	69	K.IYIPLN[+2026.687]K.T	HexNAc(2)Hex(10)Fuc(0)NeuAc(0)	N[+2027]	1444.11	2	2887.21	2887.21	0	0.8	40	Specific	414.13	248.32	248.32	4.95	11	>sp|Q92542|NICA_HUMAN Nicastrin OS=Homo sapiens GN=NCSTN PE=1 SV=2	11288	cacoP7gpep1.11218.11218.2	controllerType=0 controllerNumber=1 scan=11218	36.1204
12085:2	69	K.IYIPLN[+1864.634]K.T	HexNAc(2)Hex(9)Fuc(0)NeuAc(0)	N[+1865]	1363.09	2	2725.17	2725.16	0	4.8	40	Specific	453.41	255.52	255.52	5.23	11	>sp|Q92542|NICA_HUMAN Nicastrin OS=Homo sapiens GN=NCSTN PE=1 SV=2	11288	cacoP7gpep1.11222.11222.2	controllerType=0 controllerNumber=1 scan=11222	36.1345
12161:2	69	K.IYIPLN[+1702.581]K.T	HexNAc(2)Hex(8)Fuc(0)NeuAc(0)	N[+1703]	1282.06	2	2563.12	2563.11	0	4.6	40	Specific	461.69	242.85	242.85	5.25	11	>sp|Q92542|NICA_HUMAN Nicastrin OS=Homo sapiens GN=NCSTN PE=1 SV=2	11288	cacoP7gpep1.11285.11285.2	controllerType=0 controllerNumber=1 scan=11285	36.3981
12130:2	69	K.IYIPLN[+1702.581]K.T	HexNAc(2)Hex(8)Fuc(0)NeuAc(0)	N[+1703]	1282.06	2	2563.11	2563.11	0	3.2	40	Specific	462.58	319.6	319.6	5.5	11	>sp|Q92542|NICA_HUMAN Nicastrin OS=Homo sapiens GN=NCSTN PE=1 SV=2	11288	cacoP7gpep1.11259.11259.3	controllerType=0 controllerNumber=1 scan=11259	36.2941
11220:3	69	R.N[+1540.529]ISGVVLADHSGAFHNK.Y	HexNAc(2)Hex(7)Fuc(0)NeuAc(0)	N[+1541]	1102.81	3	3306.43	3306.43	0	0.5	435	Specific	278.51	105.24	105.24	5.39	11	>sp|Q92542|NICA_HUMAN Nicastrin OS=Homo sapiens GN=NCSTN PE=1 SV=2	11288	cacoP7gpep1.10560.10560.3	controllerType=0 controllerNumber=1 scan=10560	33.6566
11049:4	69	R.N[+1702.581]ISGVVLADHSGAFHNK.Y	HexNAc(2)Hex(8)Fuc(0)NeuAc(0)	N[+1703]	867.877	4	3468.49	3468.48	0	2	435	Specific	473.06	308.85	308.85	7.28	11	>sp|Q92542|NICA_HUMAN Nicastrin OS=Homo sapiens GN=NCSTN PE=1 SV=2	11288	cacoP7gpep1.10391.10391.4	controllerType=0 controllerNumber=1 scan=10391	33.1767
11207:3	69	R.N[+1702.581]ISGVVLADHSGAFHNK.Y	HexNAc(2)Hex(8)Fuc(0)NeuAc(0)	N[+1703]	1156.84	3	3468.5	3468.48	0	5.7	435	Specific	546.42	349.01	349.01	7.31	11	>sp|Q92542|NICA_HUMAN Nicastrin OS=Homo sapiens GN=NCSTN PE=1 SV=2	11288	cacoP7gpep1.10548.10548.3	controllerType=0 controllerNumber=1 scan=10548	33.6158
11115:3	69	R.N[+1702.581]ISGVVLADHSGAFHNK.Y	HexNAc(2)Hex(8)Fuc(0)NeuAc(0)	N[+1703]	1156.83	3	3468.48	3468.48	0	-1.2	435	Specific	693.92	310	310	10.1	11	>sp|Q92542|NICA_HUMAN Nicastrin OS=Homo sapiens GN=NCSTN PE=1 SV=2	11288	cacoP7gpep1.10452.10452.3	controllerType=0 controllerNumber=1 scan=10452	33.3435
21197:3	69	K.AN[+1702.581]NSWFQSILR.Q	HexNAc(2)Hex(8)Fuc(0)NeuAc(0)	N[+1703]	1013.43	3	3038.27	3038.26	0	4.2	529	Specific	246.17	86.12	86.12	4.81	11	>sp|Q92542|NICA_HUMAN Nicastrin OS=Homo sapiens GN=NCSTN PE=1 SV=2	11288	cacoP7gpep1.18650.18650.3	controllerType=0 controllerNumber=1 scan=18650	71.4218
21130:3	69	K.AN[+1864.634]NSWFQSILR.Q	HexNAc(2)Hex(9)Fuc(0)NeuAc(0)	N[+1865]	1067.44	3	3200.32	3200.31	0	1.5	529	Specific	332.26	196.66	196.66	5.82	11	>sp|Q92542|NICA_HUMAN Nicastrin OS=Homo sapiens GN=NCSTN PE=1 SV=2	11288	cacoP7gpep1.18594.18594.3	controllerType=0 controllerNumber=1 scan=18594	71.1462
16838:4	70	R.HEEGHMLN[+2861.000]C[+57.021]TC[+57.021]FGQGR.G	HexNAc(5)Hex(6)Fuc(0)NeuAc(3)	C[+57]*2, N[+2861]	1198.96	4	4792.8	4793.79	-1	2.5	535	Specific	131.83	37.78	37.78	2.88	6	>sp|P02751|FINC_HUMAN Fibronectin OS=Homo sapiens GN=FN1 PE=1 SV=4	6163	cacoP7gpep1.14877.14877.4	controllerType=0 controllerNumber=1 scan=14877	53.6004
01159:2	71	K.ILN[+1864.634]GSNK.K	HexNAc(2)Hex(9)Fuc(0)NeuAc(0)	N[+1865]	1305.54	2	2610.06	2610.05	0	3.2	193	Specific	349.91	102.05	102.05	4.44	6	>sp|Q9UBV2|SE1L1_HUMAN Protein sel-1 homolog 1 OS=Homo sapiens GN=SEL1L PE=1 SV=3	15568	cacoP7gpep1.2741.2741.2	controllerType=0 controllerNumber=1 scan=2741	11.1392
01149:2	71	K.ILN[+1864.634]GSNK.K	HexNAc(2)Hex(9)Fuc(0)NeuAc(0)	N[+1865]	1305.53	2	2610.06	2610.05	0	1.2	193	Specific	411.87	130.09	130.09	4.74	6	>sp|Q9UBV2|SE1L1_HUMAN Protein sel-1 homolog 1 OS=Homo sapiens GN=SEL1L PE=1 SV=3	15568	cacoP7gpep1.2734.2734.2	controllerType=0 controllerNumber=1 scan=2734	11.1148
19587:3	71	K.MYSEGSDIVPQSN[+1864.634]ETALHYFK.K	HexNAc(2)Hex(9)Fuc(0)NeuAc(0)	N[+1865]	1427.59	3	4280.76	4280.75	0	3	419	Specific	240.73	204.43	204.43	6.84	6	>sp|Q9UBV2|SE1L1_HUMAN Protein sel-1 homolog 1 OS=Homo sapiens GN=SEL1L PE=1 SV=3	15568	cacoP7gpep1.17104.17104.3	controllerType=0 controllerNumber=1 scan=17104	64.4851
11526:3	71	R.EASIVGEN[+1864.634]ETYPR.A	HexNAc(2)Hex(9)Fuc(0)NeuAc(0)	N[+1865]	1110.45	3	3329.34	3329.33	0	2.5	601	Specific	673.17	491.09	491.09	11.99	6	>sp|Q9UBV2|SE1L1_HUMAN Protein sel-1 homolog 1 OS=Homo sapiens GN=SEL1L PE=1 SV=3	15568	cacoP7gpep1.10805.10805.3	controllerType=0 controllerNumber=1 scan=10805	34.5128
11606:2	71	R.EASIVGEN[+1702.581]ETYPR.A	HexNAc(2)Hex(8)Fuc(0)NeuAc(0)	N[+1703]	1584.15	2	3167.29	3167.28	0	2.9	601	Specific	683.15	559.69	559.69	12.23	6	>sp|Q9UBV2|SE1L1_HUMAN Protein sel-1 homolog 1 OS=Homo sapiens GN=SEL1L PE=1 SV=3	15568	cacoP7gpep1.10865.10865.2	controllerType=0 controllerNumber=1 scan=10865	34.7246
11585:2	71	R.EASIVGEN[+1864.634]ETYPR.A	HexNAc(2)Hex(9)Fuc(0)NeuAc(0)	N[+1865]	1665.18	2	3329.35	3329.33	0	6	601	Specific	684.29	568.18	568.18	12.09	6	>sp|Q9UBV2|SE1L1_HUMAN Protein sel-1 homolog 1 OS=Homo sapiens GN=SEL1L PE=1 SV=3	15568	cacoP7gpep1.10849.10849.2	controllerType=0 controllerNumber=1 scan=10849	34.6712
11620:3	71	R.EASIVGEN[+1702.581]ETYPR.A	HexNAc(2)Hex(8)Fuc(0)NeuAc(0)	N[+1703]	1056.43	3	3167.29	3167.28	0	3.4	601	Specific	755.34	586.98	586.98	13.87	6	>sp|Q9UBV2|SE1L1_HUMAN Protein sel-1 homolog 1 OS=Homo sapiens GN=SEL1L PE=1 SV=3	15568	cacoP7gpep1.10876.10876.3	controllerType=0 controllerNumber=1 scan=10876	34.7636
18697:3	72	K.NYAASIYN[+2262.814]LSK.K	HexNAc(5)Hex(5)Fuc(1)NeuAc(1)	N[+2263]	1169.49	3	3506.46	3506.45	0	3.2	596	Specific	291.1	103.4	103.4	5.11	13	>sp|Q9Y3Q0|NALD2_HUMAN N-acetylated-alpha-linked acidic dipeptidase 2 OS=Homo sapiens GN=NAALAD2 PE=1 SV=1	10964	cacoP7gpep1.16311.16311.3	controllerType=0 controllerNumber=1 scan=16311	60.7701
15270:3	72	K.NYAASIYN[+1971.719]LSK.K	HexNAc(5)Hex(5)Fuc(1)NeuAc(0)	N[+1972]	1072.46	3	3215.36	3215.35	0	2.3	596	Specific	296.41	171.58	171.58	5.67	13	>sp|Q9Y3Q0|NALD2_HUMAN N-acetylated-alpha-linked acidic dipeptidase 2 OS=Homo sapiens GN=NAALAD2 PE=1 SV=1	10964	cacoP7gpep1.13683.13683.3	controllerType=0 controllerNumber=1 scan=13683	47.6425
14968:2	72	K.NYAASIYN[+1864.634]LSK.K	HexNAc(2)Hex(9)Fuc(0)NeuAc(0)	N[+1865]	1554.65	2	3108.29	3108.27	0	9.2	596	Specific	569.93	405.34	405.34	8.23	13	>sp|Q9Y3Q0|NALD2_HUMAN N-acetylated-alpha-linked acidic dipeptidase 2 OS=Homo sapiens GN=NAALAD2 PE=1 SV=1	10964	cacoP7gpep1.13440.13440.2	controllerType=0 controllerNumber=1 scan=13440	46.4454
15025:2	72	K.NYAASIYN[+1864.634]LSK.K	HexNAc(2)Hex(9)Fuc(0)NeuAc(0)	N[+1865]	1554.64	2	3108.27	3108.27	0	2.6	596	Specific	570.53	420.21	420.21	8.83	13	>sp|Q9Y3Q0|NALD2_HUMAN N-acetylated-alpha-linked acidic dipeptidase 2 OS=Homo sapiens GN=NAALAD2 PE=1 SV=1	10964	cacoP7gpep1.13486.13486.2	controllerType=0 controllerNumber=1 scan=13486	46.6753
15041:2	72	K.NYAASIYN[+1702.581]LSK.K	HexNAc(2)Hex(8)Fuc(0)NeuAc(0)	N[+1703]	1473.61	2	2946.21	2946.21	0	-1.2	596	Specific	627.02	450.24	450.24	10.56	13	>sp|Q9Y3Q0|NALD2_HUMAN N-acetylated-alpha-linked acidic dipeptidase 2 OS=Homo sapiens GN=NAALAD2 PE=1 SV=1	10964	cacoP7gpep1.13498.13498.2	controllerType=0 controllerNumber=1 scan=13498	46.7361
07782:3	72	K.N[+1864.634]FSEAASDFHK.R	HexNAc(2)Hex(9)Fuc(0)NeuAc(0)	N[+1865]	1039.74	3	3117.2	3117.19	0	3.5	628	Specific	292.67	89.96	89.96	5.12	13	>sp|Q9Y3Q0|NALD2_HUMAN N-acetylated-alpha-linked acidic dipeptidase 2 OS=Homo sapiens GN=NAALAD2 PE=1 SV=1	10964	cacoP7gpep1.7815.7815.3	controllerType=0 controllerNumber=1 scan=7815	25.2411
07796:3	72	K.N[+1702.581]FSEAASDFHK.R	HexNAc(2)Hex(8)Fuc(0)NeuAc(0)	N[+1703]	985.72	3	2955.15	2955.14	0	1.5	628	Specific	319.39	102.94	102.94	5.42	13	>sp|Q9Y3Q0|NALD2_HUMAN N-acetylated-alpha-linked acidic dipeptidase 2 OS=Homo sapiens GN=NAALAD2 PE=1 SV=1	10964	cacoP7gpep1.7830.7830.3	controllerType=0 controllerNumber=1 scan=7830	25.2824
04966:3	72	K.N[+1864.634]FSEAASDFHKR.L	HexNAc(2)Hex(9)Fuc(0)NeuAc(0)	N[+1865]	1091.77	3	3273.31	3273.29	0	4.6	628	Specific	410.61	175.51	175.51	5.73	13	>sp|Q9Y3Q0|NALD2_HUMAN N-acetylated-alpha-linked acidic dipeptidase 2 OS=Homo sapiens GN=NAALAD2 PE=1 SV=1	10964	cacoP7gpep1.5731.5731.3	controllerType=0 controllerNumber=1 scan=5731	19.8995
05029:3	72	K.N[+1702.581]FSEAASDFHKR.L	HexNAc(2)Hex(8)Fuc(0)NeuAc(0)	N[+1703]	1037.76	3	3111.25	3111.24	0	3.2	628	Specific	514.27	201.24	201.24	6.17	13	>sp|Q9Y3Q0|NALD2_HUMAN N-acetylated-alpha-linked acidic dipeptidase 2 OS=Homo sapiens GN=NAALAD2 PE=1 SV=1	10964	cacoP7gpep1.5779.5779.3	controllerType=0 controllerNumber=1 scan=5779	20.0347
17099:3	74	K.C[+57.021]NMIN[+1702.581]GTDGDSFHPLITK.D	HexNAc(2)Hex(8)Fuc(0)NeuAc(0)	C[+57], N[+1703]	1241.51	3	3722.52	3722.51	0	3.8	245	Specific	273.91	183.51	183.51	6.39	3	>sp|Q14108|SCRB2_HUMAN Lysosome membrane protein 2 OS=Homo sapiens GN=SCARB2 PE=1 SV=2	15521	cacoP7gpep1.15069.15069.3	controllerType=0 controllerNumber=1 scan=15069	54.5638
16473:3	74	K.C[+57.021]NMIN[+1864.634]GTDGDSFHPLITK.D	HexNAc(2)Hex(9)Fuc(0)NeuAc(0)	C[+57], N[+1865]	1295.53	3	3884.58	3884.56	0	4.2	245	Specific	285.77	178.84	178.84	6.48	3	>sp|Q14108|SCRB2_HUMAN Lysosome membrane protein 2 OS=Homo sapiens GN=SCARB2 PE=1 SV=2	15521	cacoP7gpep1.14602.14602.3	controllerType=0 controllerNumber=1 scan=14602	52.2246
16325:3	74	K.C[+57.021]NMIN[+2026.687]GTDGDSFHPLITK.D	HexNAc(2)Hex(10)Fuc(0)NeuAc(0)	C[+57], N[+2027]	1349.55	3	4046.62	4046.61	0	2.9	245	Specific	544.17	393.33	393.33	9.38	3	>sp|Q14108|SCRB2_HUMAN Lysosome membrane protein 2 OS=Homo sapiens GN=SCARB2 PE=1 SV=2	15521	cacoP7gpep1.14491.14491.3	controllerType=0 controllerNumber=1 scan=14491	51.6702
16329:3	74	K.C[+57.021]NMIN[+1864.634]GTDGDSFHPLITK.D	HexNAc(2)Hex(9)Fuc(0)NeuAc(0)	C[+57], N[+1865]	1295.53	3	3884.58	3884.56	0	3.9	245	Specific	654.23	545.41	545.41	12.64	3	>sp|Q14108|SCRB2_HUMAN Lysosome membrane protein 2 OS=Homo sapiens GN=SCARB2 PE=1 SV=2	15521	cacoP7gpep1.14493.14493.3	controllerType=0 controllerNumber=1 scan=14493	51.6814
16403:4	74	K.C[+57.021]NMIN[+1864.634]GTDGDSFHPLITK.D	HexNAc(2)Hex(9)Fuc(0)NeuAc(0)	C[+57], N[+1865]	971.898	4	3884.57	3884.56	0	2.3	245	Specific	671.46	429.89	429.89	12.5	3	>sp|Q14108|SCRB2_HUMAN Lysosome membrane protein 2 OS=Homo sapiens GN=SCARB2 PE=1 SV=2	15521	cacoP7gpep1.14553.14553.4	controllerType=0 controllerNumber=1 scan=14553	51.9823
16340:3	74	K.C[+57.021]NMIN[+1864.634]GTDGDSFHPLITK.D	HexNAc(2)Hex(9)Fuc(0)NeuAc(0)	C[+57], N[+1865]	1295.53	3	3884.57	3884.56	0	2.4	245	Specific	697.05	589.68	589.68	12.75	3	>sp|Q14108|SCRB2_HUMAN Lysosome membrane protein 2 OS=Homo sapiens GN=SCARB2 PE=1 SV=2	15521	cacoP7gpep1.14501.14501.3	controllerType=0 controllerNumber=1 scan=14501	51.7203
16376:3	74	K.C[+57.021]NMIN[+1702.581]GTDGDSFHPLITK.D	HexNAc(2)Hex(8)Fuc(0)NeuAc(0)	C[+57], N[+1703]	1241.51	3	3722.51	3722.51	0	1.9	245	Specific	741.38	636.25	636.25	13.67	3	>sp|Q14108|SCRB2_HUMAN Lysosome membrane protein 2 OS=Homo sapiens GN=SCARB2 PE=1 SV=2	15521	cacoP7gpep1.14531.14531.3	controllerType=0 controllerNumber=1 scan=14531	51.8706
20293:3	76	R.TQN[+1825.661]FTLLVQGSPELK.T	HexNAc(5)Hex(5)Fuc(0)NeuAc(0)	N[+1826]	1167.53	3	3500.57	3500.57	0	-0.6	437	Specific	182.74	117.47	117.47	2.86	6	>sp|P50895|BCAM_HUMAN Basal cell adhesion molecule OS=Homo sapiens GN=BCAM PE=1 SV=2	1579	cacoP7gpep1.17729.17729.3	controllerType=0 controllerNumber=1 scan=17729	67.4329
20296:3	76	R.TQN[+1825.661]FTLLVQGSPELK.T	HexNAc(5)Hex(5)Fuc(0)NeuAc(0)	N[+1826]	1167.53	3	3500.56	3500.57	0	-1.3	437	Specific	208.22	115.74	115.74	2.77	6	>sp|P50895|BCAM_HUMAN Basal cell adhesion molecule OS=Homo sapiens GN=BCAM PE=1 SV=2	1579	cacoP7gpep1.17732.17732.3	controllerType=0 controllerNumber=1 scan=17732	67.4451
18722:3	77	K.HLN[+1702.581]ASNPTEPATIIFTAAR.E	HexNAc(2)Hex(8)Fuc(0)NeuAc(0)	N[+1703]	1242.89	3	3726.65	3726.64	0	4.6	284	Specific	622.36	491.52	491.52	11.66	2	>sp|Q8NFQ8|TOIP2_HUMAN Torsin-1A-interacting protein 2 OS=Homo sapiens GN=TOR1AIP2 PE=1 SV=1	17899	cacoP7gpep1.16330.16330.3	controllerType=0 controllerNumber=1 scan=16330	60.8662
10707:4	78	K.NAC[+57.021]C[+57.021]STN[+1864.634]TSQEAHKDVSYLYR.F	HexNAc(2)Hex(9)Fuc(0)NeuAc(0)	C[+57]*2, N[+1865]	1092.94	4	4368.76	4368.73	0	6.9	63	Specific	225.05	165.72	165.72	6.36	9	>sp|P15328|FOLR1_HUMAN Folate receptor alpha OS=Homo sapiens GN=FOLR1 PE=1 SV=3	6248	cacoP7gpep1.10109.10109.3	controllerType=0 controllerNumber=1 scan=10109	32.249
10675:4	78	K.NAC[+57.021]C[+57.021]STN[+2409.893]TSQEAHKDVSYLYR.F	HexNAc(5)Hex(5)Fuc(4)NeuAc(0)	C[+57]*2, N[+2410]	1229.51	4	4915.02	4913.99	1	5.6	63	Specific	270.39	237.31	237.31	6.64	9	>sp|P15328|FOLR1_HUMAN Folate receptor alpha OS=Homo sapiens GN=FOLR1 PE=1 SV=3	6248	cacoP7gpep1.10084.10084.4	controllerType=0 controllerNumber=1 scan=10084	32.1533
10999:4	78	K.NAC[+57.021]C[+57.021]STN[+1971.719]TSQEAHKDVSYLYR.F	HexNAc(5)Hex(5)Fuc(1)NeuAc(0)	C[+57]*2, N[+1972]	1119.46	4	4474.8	4475.81	-1	-2.2	63	Specific	346.71	280.4	280.4	6.6	9	>sp|P15328|FOLR1_HUMAN Folate receptor alpha OS=Homo sapiens GN=FOLR1 PE=1 SV=3	6248	cacoP7gpep1.10348.10348.4	controllerType=0 controllerNumber=1 scan=10348	33.0363
10770:4	78	K.NAC[+57.021]C[+57.021]STN[+1540.529]TSQEAHKDVSYLYR.F	HexNAc(2)Hex(7)Fuc(0)NeuAc(0)	C[+57]*2, N[+1541]	1011.91	4	4044.63	4044.62	0	2.2	63	Specific	365.05	272.99	272.99	7.23	9	>sp|P15328|FOLR1_HUMAN Folate receptor alpha OS=Homo sapiens GN=FOLR1 PE=1 SV=3	6248	cacoP7gpep1.10158.10158.4	controllerType=0 controllerNumber=1 scan=10158	32.4061
11037:4	78	K.NAC[+57.021]C[+57.021]STN[+1971.719]TSQEAHKDVSYLYR.F	HexNAc(5)Hex(5)Fuc(1)NeuAc(0)	C[+57]*2, N[+1972]	1119.71	4	4475.82	4475.81	0	2.4	63	Specific	368.84	334.7	334.7	7.45	9	>sp|P15328|FOLR1_HUMAN Folate receptor alpha OS=Homo sapiens GN=FOLR1 PE=1 SV=3	6248	cacoP7gpep1.10383.10383.4	controllerType=0 controllerNumber=1 scan=10383	33.1485
10915:4	78	K.NAC[+57.021]C[+57.021]STN[+1930.692]TSQEAHKDVSYLYR.F	HexNAc(4)Hex(6)Fuc(1)NeuAc(0)	C[+57]*2, N[+1931]	1109.7	4	4435.77	4434.79	1	-4.8	63	Specific	381.56	310.84	310.84	6.69	9	>sp|P15328|FOLR1_HUMAN Folate receptor alpha OS=Homo sapiens GN=FOLR1 PE=1 SV=3	6248	cacoP7gpep1.10279.10279.4	controllerType=0 controllerNumber=1 scan=10279	32.7868
10808:4	78	K.NAC[+57.021]C[+57.021]STN[+2117.777]TSQEAHKDVSYLYR.F	HexNAc(5)Hex(5)Fuc(2)NeuAc(0)	C[+57]*2, N[+2118]	1156.22	4	4621.85	4621.87	0	-4.5	63	Specific	412.12	296.22	29.38	6.54	9	>sp|P15328|FOLR1_HUMAN Folate receptor alpha OS=Homo sapiens GN=FOLR1 PE=1 SV=3	6248	cacoP7gpep1.10191.10191.4	controllerType=0 controllerNumber=1 scan=10191	32.5084
10847:4	78	K.NAC[+57.021]C[+57.021]STN[+2116.756]TSQEAHKDVSYLYR.F	HexNAc(5)Hex(5)Fuc(0)NeuAc(1)	C[+57]*2, N[+2117]	1156.22	4	4621.87	4620.85	1	2.9	63	Specific	420.66	284.64	15.87	7.43	9	>sp|P15328|FOLR1_HUMAN Folate receptor alpha OS=Homo sapiens GN=FOLR1 PE=1 SV=3	6248	cacoP7gpep1.10224.10224.4	controllerType=0 controllerNumber=1 scan=10224	32.6095
10807:4	78	K.NAC[+57.021]C[+57.021]STN[+1540.529]TSQEAHKDVSYLYR.F	HexNAc(2)Hex(7)Fuc(0)NeuAc(0)	C[+57]*2, N[+1541]	1011.91	4	4044.62	4044.62	0	-1.1	63	Specific	456.91	301.16	301.16	7.11	9	>sp|P15328|FOLR1_HUMAN Folate receptor alpha OS=Homo sapiens GN=FOLR1 PE=1 SV=3	6248	cacoP7gpep1.10190.10190.4	controllerType=0 controllerNumber=1 scan=10190	32.5061
13437:3	81	K.LSQGN[+1540.529]TTLSINPVK.R	HexNAc(2)Hex(7)Fuc(0)NeuAc(0)	N[+1541]	1004.78	3	3012.34	3012.34	0	-0.9	374	Specific	369.38	246.62	246.62	5.52	7	>sp|P13688|CEAM1_HUMAN Carcinoembryonic antigen-related cell adhesion molecule 1 OS=Homo sapiens GN=CEACAM1 PE=1 SV=2	2755	cacoP7gpep1.12251.12251.3	controllerType=0 controllerNumber=1 scan=12251	40.5878
13428:3	81	K.LSQGN[+1540.529]TTLSINPVK.R	HexNAc(2)Hex(7)Fuc(0)NeuAc(0)	N[+1541]	1004.78	3	3012.34	3012.34	0	-0.4	374	Specific	373.33	207.46	207.46	5.74	7	>sp|P13688|CEAM1_HUMAN Carcinoembryonic antigen-related cell adhesion molecule 1 OS=Homo sapiens GN=CEACAM1 PE=1 SV=2	2755	cacoP7gpep1.12244.12244.3	controllerType=0 controllerNumber=1 scan=12244	40.5594
13520:3	81	K.LSQGN[+1378.476]TTLSINPVK.R	HexNAc(2)Hex(6)Fuc(0)NeuAc(0)	N[+1378]	950.769	3	2850.29	2850.29	0	2.3	374	Specific	393	388.41	388.41	8.03	7	>sp|P13688|CEAM1_HUMAN Carcinoembryonic antigen-related cell adhesion molecule 1 OS=Homo sapiens GN=CEACAM1 PE=1 SV=2	2755	cacoP7gpep1.12318.12318.3	controllerType=0 controllerNumber=1 scan=12318	40.9044
13308:3	81	K.LSQGN[+1702.581]TTLSINPVK.R	HexNAc(2)Hex(8)Fuc(0)NeuAc(0)	N[+1703]	1058.8	3	3174.4	3174.39	0	1	374	Specific	408.25	214.53	214.53	5.96	7	>sp|P13688|CEAM1_HUMAN Carcinoembryonic antigen-related cell adhesion molecule 1 OS=Homo sapiens GN=CEACAM1 PE=1 SV=2	2755	cacoP7gpep1.12155.12155.3	controllerType=0 controllerNumber=1 scan=12155	40.1375
10656:3	81	K.LSQGN[+1540.529]TTLSINPVKR.E	HexNAc(2)Hex(7)Fuc(0)NeuAc(0)	N[+1541]	1056.82	3	3168.45	3168.44	0	2.7	374	Specific	263.3	95.63	95.63	5.27	7	>sp|P13688|CEAM1_HUMAN Carcinoembryonic antigen-related cell adhesion molecule 1 OS=Homo sapiens GN=CEACAM1 PE=1 SV=2	2755	cacoP7gpep1.10070.10070.3	controllerType=0 controllerNumber=1 scan=10070	32.089
10642:3	81	K.LSQGN[+1540.529]TTLSINPVKR.E	HexNAc(2)Hex(7)Fuc(0)NeuAc(0)	N[+1541]	1056.82	3	3168.46	3168.44	0	4.7	374	Specific	325.17	150.49	150.49	5.97	7	>sp|P13688|CEAM1_HUMAN Carcinoembryonic antigen-related cell adhesion molecule 1 OS=Homo sapiens GN=CEACAM1 PE=1 SV=2	2755	cacoP7gpep1.10057.10057.3	controllerType=0 controllerNumber=1 scan=10057	32.0391
10912:3	81	K.LSQGN[+1216.423]TTLSINPVKR.E	HexNAc(2)Hex(5)Fuc(0)NeuAc(0)	N[+1216]	948.784	3	2844.34	2844.34	0	0.5	374	Specific	376.94	320.83	320.83	6.5	7	>sp|P13688|CEAM1_HUMAN Carcinoembryonic antigen-related cell adhesion molecule 1 OS=Homo sapiens GN=CEACAM1 PE=1 SV=2	2755	cacoP7gpep1.10278.10278.3	controllerType=0 controllerNumber=1 scan=10278	32.7837
10555:3	81	K.LSQGN[+1702.581]TTLSINPVKR.E	HexNAc(2)Hex(8)Fuc(0)NeuAc(0)	N[+1703]	1110.84	3	3330.5	3330.49	0	1.7	374	Specific	412.99	375.59	375.59	6.89	7	>sp|P13688|CEAM1_HUMAN Carcinoembryonic antigen-related cell adhesion molecule 1 OS=Homo sapiens GN=CEACAM1 PE=1 SV=2	2755	cacoP7gpep1.9977.9977.3	controllerType=0 controllerNumber=1 scan=9977	31.7597
10805:3	81	K.LSQGN[+1378.476]TTLSINPVKR.E	HexNAc(2)Hex(6)Fuc(0)NeuAc(0)	N[+1378]	1002.8	3	3006.39	3006.39	0	0.6	374	Specific	561.64	385.23	385.23	8.83	7	>sp|P13688|CEAM1_HUMAN Carcinoembryonic antigen-related cell adhesion molecule 1 OS=Homo sapiens GN=CEACAM1 PE=1 SV=2	2755	cacoP7gpep1.10188.10188.3	controllerType=0 controllerNumber=1 scan=10188	32.4982
29191:4	86	K.IITILEEEMN[+2204.772]VSVC[+57.021]GLYTYGK.P	HexNAc(4)Hex(5)Fuc(0)NeuAc(2)	C[+57], N[+2205]	1159.75	4	4635.98	4636.98	-1	-0.1	238	Specific	174.04	137.52	137.52	2.33	10	>sp|P01023|A2MG_HUMAN Alpha-2-macroglobulin OS=Homo sapiens GN=A2M PE=1 SV=3	167	cacoP7gpep1.44296.44296.4	controllerType=0 controllerNumber=1 scan=44296	183.817
15494:3	87	R.NLQVYN[+1702.581]ATSNSLTVK.W	HexNAc(2)Hex(8)Fuc(0)NeuAc(0)	N[+1703]	1118.82	3	3354.45	3354.45	0	2.6	1758	Specific	640.03	438.56	438.56	10.99	4	>sp|Q99715|COCA1_HUMAN Collagen alpha-1(XII) chain OS=Homo sapiens GN=COL12A1 PE=1 SV=2	3548	cacoP7gpep1.13861.13861.3	controllerType=0 controllerNumber=1 scan=13861	48.5258
15438:3	87	R.NLQVYN[+1864.634]ATSNSLTVK.W	HexNAc(2)Hex(9)Fuc(0)NeuAc(0)	N[+1865]	1172.84	3	3516.51	3516.5	0	3.7	1758	Specific	652.35	548.32	548.32	11.87	4	>sp|Q99715|COCA1_HUMAN Collagen alpha-1(XII) chain OS=Homo sapiens GN=COL12A1 PE=1 SV=2	3548	cacoP7gpep1.13819.13819.3	controllerType=0 controllerNumber=1 scan=13819	48.3149
15434:3	87	R.NLQVYN[+1864.634]ATSNSLTVK.W	HexNAc(2)Hex(9)Fuc(0)NeuAc(0)	N[+1865]	1172.84	3	3516.52	3516.5	0	5.5	1758	Specific	702.92	445.9	445.9	12.84	4	>sp|Q99715|COCA1_HUMAN Collagen alpha-1(XII) chain OS=Homo sapiens GN=COL12A1 PE=1 SV=2	3548	cacoP7gpep1.13815.13815.3	controllerType=0 controllerNumber=1 scan=13815	48.2987
18320:3	87	K.EAGN[+1702.581]ITTDGYEILGK.L	HexNAc(2)Hex(8)Fuc(0)NeuAc(0)	N[+1703]	1095.13	3	3283.37	3283.36	0	3	2676	Specific	439.37	239.43	239.43	6.2	4	>sp|Q99715|COCA1_HUMAN Collagen alpha-1(XII) chain OS=Homo sapiens GN=COL12A1 PE=1 SV=2	3548	cacoP7gpep1.16023.16023.3	controllerType=0 controllerNumber=1 scan=16023	59.3269
18298:3	87	K.EAGN[+1864.634]ITTDGYEILGK.L	HexNAc(2)Hex(9)Fuc(0)NeuAc(0)	N[+1865]	1149.15	3	3445.43	3445.41	0	3.8	2676	Specific	475.84	258.27	258.27	6.22	4	>sp|Q99715|COCA1_HUMAN Collagen alpha-1(XII) chain OS=Homo sapiens GN=COL12A1 PE=1 SV=2	3548	cacoP7gpep1.16004.16004.3	controllerType=0 controllerNumber=1 scan=16004	59.232
20668:3	88	R.SLTQGSLIVGDLAPVN[+1971.719]GTSQGK.F	HexNAc(5)Hex(5)Fuc(1)NeuAc(0)	N[+1972]	1371.97	3	4113.9	4113.86	0	9.7	3765	Specific	204.05	204.05	204.05	4.1	4	>sp|P98160|PGBM_HUMAN Basement membrane-specific heparan sulfate proteoglycan core protein OS=Homo sapiens GN=HSPG2 PE=1 SV=4	12916	cacoP7gpep1.18145.18145.3	controllerType=0 controllerNumber=1 scan=18145	69.1626
20704:3	88	R.SLTQGSLIVGDLAPVN[+1930.692]GTSQGK.F	HexNAc(4)Hex(6)Fuc(1)NeuAc(0)	N[+1931]	1358.28	3	4072.82	4072.83	0	-4.1	3765	Specific	228.21	228.21	228.21	5.68	4	>sp|P98160|PGBM_HUMAN Basement membrane-specific heparan sulfate proteoglycan core protein OS=Homo sapiens GN=HSPG2 PE=1 SV=4	12916	cacoP7gpep1.18179.18179.3	controllerType=0 controllerNumber=1 scan=18179	69.3084
19225:3	89	K.Q[-17.027]LVHSFAEGQDQGSAYAN[+2409.893]R.T	HexNAc(5)Hex(5)Fuc(4)NeuAc(0)	N[+2410], Q[-17]	1490.63	3	4469.86	4470.83	-1	6.9	74	Specific	151.09	120.57	120.57	3.06	14	>sp|Q5ZPR3|CD276_HUMAN CD276 antigen OS=Homo sapiens GN=CD276 PE=1 SV=1	2581	cacoP7gpep1.16764.16764.3	controllerType=0 controllerNumber=1 scan=16764	62.9482
19395:3	89	K.Q[-17.027]LVHSFAEGQDQGSAYAN[+2262.814]R.T	HexNAc(5)Hex(5)Fuc(1)NeuAc(1)	N[+2263], Q[-17]	1441.59	3	4322.75	4323.76	-1	-1.8	74	Specific	236.99	185.5	185.5	5.98	14	>sp|Q5ZPR3|CD276_HUMAN CD276 antigen OS=Homo sapiens GN=CD276 PE=1 SV=1	2581	cacoP7gpep1.16937.16937.3	controllerType=0 controllerNumber=1 scan=16937	63.7183
19379:3	89	K.Q[-17.027]LVHSFAEGQDQGSAYAN[+2262.814]R.T	HexNAc(5)Hex(5)Fuc(1)NeuAc(1)	N[+2263], Q[-17]	1441.93	3	4323.79	4323.76	0	6.8	74	Specific	238.12	159.89	20.31	5.88	14	>sp|Q5ZPR3|CD276_HUMAN CD276 antigen OS=Homo sapiens GN=CD276 PE=1 SV=1	2581	cacoP7gpep1.16926.16926.3	controllerType=0 controllerNumber=1 scan=16926	63.6624
16477:3	89	R.VVLGAN[+1864.634]GTYSC[+57.021]LVR.N	HexNAc(2)Hex(9)Fuc(0)NeuAc(0)	C[+57], N[+1865]	1125.15	3	3373.43	3373.42	0	2.4	210	Specific	178.97	48.16	48.16	2.44	14	>sp|Q5ZPR3|CD276_HUMAN CD276 antigen OS=Homo sapiens GN=CD276 PE=1 SV=1	2581	cacoP7gpep1.14605.14605.3	controllerType=0 controllerNumber=1 scan=14605	52.2413
16482:3	89	R.VVLGAN[+2263.835]GTYSC[+57.021]LVR.N	HexNAc(5)Hex(5)Fuc(3)NeuAc(0)	C[+57], N[+2264]	1258.21	3	3772.63	3772.62	0	1.6	210	Specific	264.58	85.11	85.11	4.93	14	>sp|Q5ZPR3|CD276_HUMAN CD276 antigen OS=Homo sapiens GN=CD276 PE=1 SV=1	2581	cacoP7gpep1.14608.14608.3	controllerType=0 controllerNumber=1 scan=14608	52.2576
16490:3	89	R.VVLGAN[+1702.581]GTYSC[+57.021]LVR.N	HexNAc(2)Hex(8)Fuc(0)NeuAc(0)	C[+57], N[+1703]	1071.14	3	3211.39	3211.37	0	6.7	210	Specific	267.8	252.2	252.2	5.45	14	>sp|Q5ZPR3|CD276_HUMAN CD276 antigen OS=Homo sapiens GN=CD276 PE=1 SV=1	2581	cacoP7gpep1.14617.14617.3	controllerType=0 controllerNumber=1 scan=14617	52.3023
19727:3	89	R.VVLGAN[+2774.004]GTYSC[+57.021]LVR.N	HexNAc(6)Hex(6)Fuc(2)NeuAc(1)	C[+57], N[+2774]	1427.93	3	4281.79	4282.79	-1	-0.8	210	Specific	299.07	130.64	22.4	5.36	14	>sp|Q5ZPR3|CD276_HUMAN CD276 antigen OS=Homo sapiens GN=CD276 PE=1 SV=1	2581	cacoP7gpep1.17232.17232.3	controllerType=0 controllerNumber=1 scan=17232	65.1127
19791:3	89	R.VVLGAN[+2627.947]GTYSC[+57.021]LVR.N	HexNAc(6)Hex(6)Fuc(1)NeuAc(1)	C[+57], N[+2628]	1379.58	3	4136.73	4136.74	0	-0.4	210	Specific	321.11	180.23	41.81	5.7	14	>sp|Q5ZPR3|CD276_HUMAN CD276 antigen OS=Homo sapiens GN=CD276 PE=1 SV=1	2581	cacoP7gpep1.17283.17283.3	controllerType=0 controllerNumber=1 scan=17283	65.3662
16681:3	89	R.VVLGAN[+1971.719]GTYSC[+57.021]LVR.N	HexNAc(5)Hex(5)Fuc(1)NeuAc(0)	C[+57], N[+1972]	1160.85	3	3480.53	3480.51	0	6.4	210	Specific	323.24	100.09	100.09	5.25	14	>sp|Q5ZPR3|CD276_HUMAN CD276 antigen OS=Homo sapiens GN=CD276 PE=1 SV=1	2581	cacoP7gpep1.14752.14752.3	controllerType=0 controllerNumber=1 scan=14752	52.9783
19765:3	89	R.VVLGAN[+2408.872]GTYSC[+57.021]LVR.N	HexNAc(5)Hex(5)Fuc(2)NeuAc(1)	C[+57], N[+2409]	1306.57	3	3917.69	3917.66	0	8	210	Specific	424.46	204	204	6.03	14	>sp|Q5ZPR3|CD276_HUMAN CD276 antigen OS=Homo sapiens GN=CD276 PE=1 SV=1	2581	cacoP7gpep1.17261.17261.3	controllerType=0 controllerNumber=1 scan=17261	65.2586
19759:3	89	R.VVLGAN[+2262.814]GTYSC[+57.021]LVR.N	HexNAc(5)Hex(5)Fuc(1)NeuAc(1)	C[+57], N[+2263]	1257.88	3	3771.62	3771.6	0	5.1	210	Specific	536.07	241.53	241.53	6.5	14	>sp|Q5ZPR3|CD276_HUMAN CD276 antigen OS=Homo sapiens GN=CD276 PE=1 SV=1	2581	cacoP7gpep1.17257.17257.3	controllerType=0 controllerNumber=1 scan=17257	65.2369
19786:3	89	R.VVLGAN[+2627.947]GTYSC[+57.021]LVR.N	HexNAc(6)Hex(6)Fuc(1)NeuAc(1)	C[+57], N[+2628]	1379.59	3	4136.75	4136.74	0	2.5	428	Specific	302.28	103.71	31.04	5.39	14	>sp|Q5ZPR3|CD276_HUMAN CD276 antigen OS=Homo sapiens GN=CD276 PE=1 SV=1	2581	cacoP7gpep1.17277.17277.3	controllerType=0 controllerNumber=1 scan=17277	65.3377
19940:3	89	R.VVLGAN[+2262.814]GTYSC[+57.021]LVR.N	HexNAc(5)Hex(5)Fuc(1)NeuAc(1)	C[+57], N[+2263]	1257.88	3	3771.62	3771.6	0	4.5	428	Specific	311.08	169.93	169.93	5.74	14	>sp|Q5ZPR3|CD276_HUMAN CD276 antigen OS=Homo sapiens GN=CD276 PE=1 SV=1	2581	cacoP7gpep1.17409.17409.3	controllerType=0 controllerNumber=1 scan=17409	65.9673
16469:3	89	R.VVLGAN[+2628.967]GTYSC[+57.021]LVR.N	HexNAc(6)Hex(6)Fuc(3)NeuAc(0)	C[+57], N[+2629]	1379.93	3	4137.78	4137.76	0	5.9	428	Specific	383.68	240.02	240.02	5.97	14	>sp|Q5ZPR3|CD276_HUMAN CD276 antigen OS=Homo sapiens GN=CD276 PE=1 SV=1	2581	cacoP7gpep1.14598.14598.3	controllerType=0 controllerNumber=1 scan=14598	52.2104
19984:3	91	R.EEEAIQLDGLN[+1702.581]ASQIR.E	HexNAc(2)Hex(8)Fuc(0)NeuAc(0)	N[+1703]	1163.5	3	3488.48	3488.48	0	1.6	52	Specific	278.58	108.34	108.34	5.68	4	>sp|P14625|ENPL_HUMAN Endoplasmin OS=Homo sapiens GN=HSP90B1 PE=1 SV=1	5313	cacoP7gpep1.17446.17446.3	controllerType=0 controllerNumber=1 scan=17446	66.1523
18169:3	91	K.GVVDSDDLPLN[+1702.581]VSR.E	HexNAc(2)Hex(8)Fuc(0)NeuAc(0)	N[+1703]	1063.45	3	3188.35	3188.34	0	3.5	435	Specific	309.53	121.35	121.35	5.49	4	>sp|P14625|ENPL_HUMAN Endoplasmin OS=Homo sapiens GN=HSP90B1 PE=1 SV=1	5313	cacoP7gpep1.15905.15905.3	controllerType=0 controllerNumber=1 scan=15905	58.7354
19126:3	94	R.ADGTVNQIEGEATPVN[+1540.529]LTEPAK.L	HexNAc(2)Hex(7)Fuc(0)NeuAc(0)	N[+1541]	1265.55	3	3794.65	3794.65	0	-0.3	83	Specific	343.68	299.67	299.67	6.64	4	>sp|P05090|APOD_HUMAN Apolipoprotein D OS=Homo sapiens GN=APOD PE=1 SV=1	991	cacoP7gpep1.16674.16674.3	controllerType=0 controllerNumber=1 scan=16674	62.5498
19028:3	94	R.ADGTVNQIEGEATPVN[+1864.634]LTEPAK.L	HexNAc(2)Hex(9)Fuc(0)NeuAc(0)	N[+1865]	1373.59	3	4118.76	4118.75	0	0.3	83	Specific	581.07	491.92	491.92	10.64	4	>sp|P05090|APOD_HUMAN Apolipoprotein D OS=Homo sapiens GN=APOD PE=1 SV=1	991	cacoP7gpep1.16588.16588.3	controllerType=0 controllerNumber=1 scan=16588	62.1404
19064:3	94	R.ADGTVNQIEGEATPVN[+1702.581]LTEPAK.L	HexNAc(2)Hex(8)Fuc(0)NeuAc(0)	N[+1703]	1319.57	3	3956.71	3956.7	0	2.1	83	Specific	631.95	432.89	432.89	11.71	4	>sp|P05090|APOD_HUMAN Apolipoprotein D OS=Homo sapiens GN=APOD PE=1 SV=1	991	cacoP7gpep1.16621.16621.3	controllerType=0 controllerNumber=1 scan=16621	62.2933
19025:3	94	R.ADGTVNQIEGEATPVN[+1702.581]LTEPAK.L	HexNAc(2)Hex(8)Fuc(0)NeuAc(0)	N[+1703]	1319.57	3	3956.71	3956.7	0	1.8	83	Specific	700.61	538.07	538.07	13.71	4	>sp|P05090|APOD_HUMAN Apolipoprotein D OS=Homo sapiens GN=APOD PE=1 SV=1	991	cacoP7gpep1.16586.16586.3	controllerType=0 controllerNumber=1 scan=16586	62.1295
12928:3	99	R.FN[+1825.661]STEYQVVTR.V	HexNAc(5)Hex(5)Fuc(0)NeuAc(0)	N[+1826]	1057.12	3	3169.34	3169.32	0	7	445	Specific	305	125.59	125.59	5.17	10	>sp|Q07954|LRP1_HUMAN Prolow-density lipoprotein receptor-related protein 1 OS=Homo sapiens GN=LRP1 PE=1 SV=2	9662	cacoP7gpep1.11859.11859.3	controllerType=0 controllerNumber=1 scan=11859	38.7995
12625:3	99	R.FN[+1864.634]STEYQVVTR.V	HexNAc(2)Hex(9)Fuc(0)NeuAc(0)	N[+1865]	1070.11	3	3208.31	3208.29	0	4.7	445	Specific	325.8	203.64	203.64	5.83	10	>sp|Q07954|LRP1_HUMAN Prolow-density lipoprotein receptor-related protein 1 OS=Homo sapiens GN=LRP1 PE=1 SV=2	9662	cacoP7gpep1.11629.11629.3	controllerType=0 controllerNumber=1 scan=11629	37.7916
12642:3	99	R.FN[+1702.581]STEYQVVTR.V	HexNAc(2)Hex(8)Fuc(0)NeuAc(0)	N[+1703]	1016.09	3	3046.24	3046.24	0	1.1	445	Specific	385.11	258.69	258.69	5.82	10	>sp|Q07954|LRP1_HUMAN Prolow-density lipoprotein receptor-related protein 1 OS=Homo sapiens GN=LRP1 PE=1 SV=2	9662	cacoP7gpep1.11644.11644.3	controllerType=0 controllerNumber=1 scan=11644	37.8454
11061:3	99	R.TC[+57.021]VSN[+1864.634]C[+57.021]TASQFVC[+57.021]K.N	HexNAc(2)Hex(9)Fuc(0)NeuAc(0)	C[+57]*3, N[+1865]	1176.12	3	3526.34	3526.34	0	-0.2	3329	Specific	439.01	240.22	240.22	5.9	10	>sp|Q07954|LRP1_HUMAN Prolow-density lipoprotein receptor-related protein 1 OS=Homo sapiens GN=LRP1 PE=1 SV=2	9662	cacoP7gpep1.10402.10402.3	controllerType=0 controllerNumber=1 scan=10402	33.2131
11046:3	99	R.TC[+57.021]VSN[+1864.634]C[+57.021]TASQFVC[+57.021]K.N	HexNAc(2)Hex(9)Fuc(0)NeuAc(0)	C[+57]*3, N[+1865]	1176.12	3	3526.35	3526.34	0	1	3329	Specific	507.65	269.69	269.69	6.44	10	>sp|Q07954|LRP1_HUMAN Prolow-density lipoprotein receptor-related protein 1 OS=Homo sapiens GN=LRP1 PE=1 SV=2	9662	cacoP7gpep1.10388.10388.3	controllerType=0 controllerNumber=1 scan=10388	33.1639
08559:3	99	K.LTSC[+57.021]ATN[+1864.634]ASIC[+57.021]GDEAR.C	HexNAc(2)Hex(9)Fuc(0)NeuAc(0)	C[+57]*2, N[+1865]	1197.47	3	3590.38	3590.39	0	-1.1	3782	Specific	197.86	141.59	141.59	3.4	10	>sp|Q07954|LRP1_HUMAN Prolow-density lipoprotein receptor-related protein 1 OS=Homo sapiens GN=LRP1 PE=1 SV=2	9662	cacoP7gpep1.8412.8412.3	controllerType=0 controllerNumber=1 scan=8412	26.9868
10149:3	99	R.GVTHLN[+1864.634]ISGLK.M	HexNAc(2)Hex(9)Fuc(0)NeuAc(0)	N[+1865]	1001.77	3	3003.3	3003.29	0	1.5	3948	Specific	298.96	93.56	93.56	5.16	10	>sp|Q07954|LRP1_HUMAN Prolow-density lipoprotein receptor-related protein 1 OS=Homo sapiens GN=LRP1 PE=1 SV=2	9662	cacoP7gpep1.9631.9631.3	controllerType=0 controllerNumber=1 scan=9631	30.6125
07535:3	99	R.LN[+1702.581]GTDPIVAADSKR.G	HexNAc(2)Hex(8)Fuc(0)NeuAc(0)	N[+1703]	1053.79	3	3159.37	3159.36	0	3.9	4074	Specific	373.33	199.93	199.93	6.19	10	>sp|Q07954|LRP1_HUMAN Prolow-density lipoprotein receptor-related protein 1 OS=Homo sapiens GN=LRP1 PE=1 SV=2	9662	cacoP7gpep1.7616.7616.3	controllerType=0 controllerNumber=1 scan=7616	24.7614
07522:3	99	R.LN[+1864.634]GTDPIVAADSKR.G	HexNAc(2)Hex(9)Fuc(0)NeuAc(0)	N[+1865]	1107.81	3	3321.43	3321.41	0	5.9	4074	Specific	557.74	449.78	449.78	8.73	10	>sp|Q07954|LRP1_HUMAN Prolow-density lipoprotein receptor-related protein 1 OS=Homo sapiens GN=LRP1 PE=1 SV=2	9662	cacoP7gpep1.7607.7607.3	controllerType=0 controllerNumber=1 scan=7607	24.734
18322:3	100	R.AC[+57.021]N[+1540.529]SSAPDLSGC[+57.021]DLLC[+57.021]C[+57.021]GR.G	HexNAc(2)Hex(7)Fuc(0)NeuAc(0)	C[+57]*4, N[+1541]	1218.47	3	3653.4	3653.39	0	5	309	Specific	312.44	219.95	219.95	6.34	3	>sp|Q9Y6F9|WNT6_HUMAN Protein Wnt-6 OS=Homo sapiens GN=WNT6 PE=1 SV=2	19110	cacoP7gpep1.16025.16025.3	controllerType=0 controllerNumber=1 scan=16025	59.3381
18054:3	100	R.AC[+57.021]N[+2026.687]SSAPDLSGC[+57.021]DLLC[+57.021]C[+57.021]GR.G	HexNAc(2)Hex(10)Fuc(0)NeuAc(0)	C[+57]*4, N[+2027]	1380.19	3	4138.55	4139.54	-1	3.3	309	Specific	587.1	440.04	440.04	10.51	3	>sp|Q9Y6F9|WNT6_HUMAN Protein Wnt-6 OS=Homo sapiens GN=WNT6 PE=1 SV=2	19110	cacoP7gpep1.15811.15811.3	controllerType=0 controllerNumber=1 scan=15811	58.2729
18194:3	100	R.AC[+57.021]N[+1702.581]SSAPDLSGC[+57.021]DLLC[+57.021]C[+57.021]GR.G	HexNAc(2)Hex(8)Fuc(0)NeuAc(0)	C[+57]*4, N[+1703]	1272.49	3	3815.45	3815.44	0	2.5	309	Specific	651.95	542.02	542.02	12.5	3	>sp|Q9Y6F9|WNT6_HUMAN Protein Wnt-6 OS=Homo sapiens GN=WNT6 PE=1 SV=2	19110	cacoP7gpep1.15922.15922.3	controllerType=0 controllerNumber=1 scan=15922	58.8198
18162:3	100	R.AC[+57.021]N[+1702.581]SSAPDLSGC[+57.021]DLLC[+57.021]C[+57.021]GR.G	HexNAc(2)Hex(8)Fuc(0)NeuAc(0)	C[+57]*4, N[+1703]	1272.49	3	3815.46	3815.44	0	7	309	Specific	652.7	550.26	550.26	12.21	3	>sp|Q9Y6F9|WNT6_HUMAN Protein Wnt-6 OS=Homo sapiens GN=WNT6 PE=1 SV=2	19110	cacoP7gpep1.15899.15899.3	controllerType=0 controllerNumber=1 scan=15899	58.7071
16504:4	102	R.MDPPC[+57.021]TN[+2921.083]TTAASTYLNNPYVR.K	HexNAc(6)Hex(6)Fuc(5)NeuAc(0)	C[+57], N[+2921]	1327.81	4	5308.21	5307.16	1	7.3	327	Specific	352.74	33.36	33.36	4.54	4	>sp|P10619|PPGB_HUMAN Lysosomal protective protein OS=Homo sapiens GN=CTSA PE=1 SV=2	13434	cacoP7gpep1.14626.14626.3	controllerType=0 controllerNumber=1 scan=14626	52.3472
20804:3	102	R.MDPPC[+57.021]TN[+1378.476]TTAASTYLNNPYVR.K	HexNAc(2)Hex(6)Fuc(0)NeuAc(0)	C[+57], N[+1378]	1255.53	3	3764.57	3764.56	0	3.7	327	Specific	561.3	506.22	506.22	9.41	4	>sp|P10619|PPGB_HUMAN Lysosomal protective protein OS=Homo sapiens GN=CTSA PE=1 SV=2	13434	cacoP7gpep1.18284.18284.3	controllerType=0 controllerNumber=1 scan=18284	69.7621
20716:3	102	R.MDPPC[+57.021]TN[+1540.529]TTAASTYLNNPYVR.K	HexNAc(2)Hex(7)Fuc(0)NeuAc(0)	C[+57], N[+1541]	1309.54	3	3926.6	3926.61	0	-1.4	327	Specific	586.98	513.43	513.43	10.25	4	>sp|P10619|PPGB_HUMAN Lysosomal protective protein OS=Homo sapiens GN=CTSA PE=1 SV=2	13434	cacoP7gpep1.18193.18193.3	controllerType=0 controllerNumber=1 scan=18193	69.3698
20762:3	102	R.MDPPC[+57.021]TN[+1540.529]TTAASTYLNNPYVR.K	HexNAc(2)Hex(7)Fuc(0)NeuAc(0)	C[+57], N[+1541]	1309.54	3	3926.61	3926.61	0	0.6	327	Specific	619.53	541.74	541.74	11.64	4	>sp|P10619|PPGB_HUMAN Lysosomal protective protein OS=Homo sapiens GN=CTSA PE=1 SV=2	13434	cacoP7gpep1.18243.18243.3	controllerType=0 controllerNumber=1 scan=18243	69.5858
09310:3	106	K.IN[+1955.724]ATDADEPNTLNSK.I	HexNAc(5)Hex(4)Fuc(2)NeuAc(0)	N[+1956]	1186.84	3	3558.51	3558.48	0	7	181	Specific	247.07	130.73	130.73	5.18	7	>sp|Q14126|DSG2_HUMAN Desmoglein-2 OS=Homo sapiens GN=DSG2 PE=1 SV=2	4905	cacoP7gpep1.8995.8995.3	controllerType=0 controllerNumber=1 scan=8995	28.5937
09324:3	106	K.IN[+1955.724]ATDADEPNTLNSK.I	HexNAc(5)Hex(4)Fuc(2)NeuAc(0)	N[+1956]	1186.84	3	3558.51	3558.48	0	6.4	181	Specific	247.26	215.01	215.01	5.49	7	>sp|Q14126|DSG2_HUMAN Desmoglein-2 OS=Homo sapiens GN=DSG2 PE=1 SV=2	4905	cacoP7gpep1.9006.9006.3	controllerType=0 controllerNumber=1 scan=9006	28.6247
09461:3	106	K.IN[+2117.777]ATDADEPNTLNSK.I	HexNAc(5)Hex(5)Fuc(2)NeuAc(0)	N[+2118]	1240.85	3	3720.55	3720.54	0	3.3	181	Specific	331.67	178.54	178.54	5.88	7	>sp|Q14126|DSG2_HUMAN Desmoglein-2 OS=Homo sapiens GN=DSG2 PE=1 SV=2	4905	cacoP7gpep1.9106.9106.3	controllerType=0 controllerNumber=1 scan=9106	28.8967
09521:3	106	K.IN[+2117.777]ATDADEPNTLNSK.I	HexNAc(5)Hex(5)Fuc(2)NeuAc(0)	N[+2118]	1240.85	3	3720.55	3720.54	0	2.9	181	Specific	334.08	201.47	201.47	6.07	7	>sp|Q14126|DSG2_HUMAN Desmoglein-2 OS=Homo sapiens GN=DSG2 PE=1 SV=2	4905	cacoP7gpep1.9156.9156.3	controllerType=0 controllerNumber=1 scan=9156	29.0345
13099:3	106	K.IN[+2262.814]ATDADEPNTLNSK.I	HexNAc(5)Hex(5)Fuc(1)NeuAc(1)	N[+2263]	1289.2	3	3865.58	3865.57	0	0.8	181	Specific	345.97	161.11	161.11	5.82	7	>sp|Q14126|DSG2_HUMAN Desmoglein-2 OS=Homo sapiens GN=DSG2 PE=1 SV=2	4905	cacoP7gpep1.11992.11992.3	controllerType=0 controllerNumber=1 scan=11992	39.4166
15940:3	106	K.IN[+2553.910]ATDADEPNTLNSK.I	HexNAc(5)Hex(5)Fuc(1)NeuAc(2)	N[+2554]	1385.9	3	4155.69	4156.67	-1	4.3	181	Specific	353.12	172.68	172.68	6	7	>sp|Q14126|DSG2_HUMAN Desmoglein-2 OS=Homo sapiens GN=DSG2 PE=1 SV=2	4905	cacoP7gpep1.14191.14191.3	controllerType=0 controllerNumber=1 scan=14191	50.1729
09831:3	106	K.IN[+2117.777]ATDADEPNTLNSK.I	HexNAc(5)Hex(5)Fuc(2)NeuAc(0)	N[+2118]	1240.85	3	3720.55	3720.54	0	3.4	181	Specific	394.92	219	219	6.02	7	>sp|Q14126|DSG2_HUMAN Desmoglein-2 OS=Homo sapiens GN=DSG2 PE=1 SV=2	4905	cacoP7gpep1.9390.9390.3	controllerType=0 controllerNumber=1 scan=9390	29.81
12845:3	106	K.IN[+2262.814]ATDADEPNTLNSK.I	HexNAc(5)Hex(5)Fuc(1)NeuAc(1)	N[+2263]	1289.2	3	3865.57	3865.57	0	0	181	Specific	434	191.63	191.63	5.89	7	>sp|Q14126|DSG2_HUMAN Desmoglein-2 OS=Homo sapiens GN=DSG2 PE=1 SV=2	4905	cacoP7gpep1.11796.11796.3	controllerType=0 controllerNumber=1 scan=11796	38.5043
13036:3	106	K.IN[+2263.835]ATDADEPNTLNSK.I	HexNAc(5)Hex(5)Fuc(3)NeuAc(0)	N[+2264]	1289.54	3	3866.61	3866.6	0	4.7	181	Specific	469.04	293.79	293.79	6.37	7	>sp|Q14126|DSG2_HUMAN Desmoglein-2 OS=Homo sapiens GN=DSG2 PE=1 SV=2	4905	cacoP7gpep1.11944.11944.3	controllerType=0 controllerNumber=1 scan=11944	39.1988
09793:3	106	K.IN[+1971.719]ATDADEPNTLNSK.I	HexNAc(5)Hex(5)Fuc(1)NeuAc(0)	N[+1972]	1192.17	3	3574.49	3574.48	0	3.8	181	Specific	540.72	307.26	307.26	6.86	7	>sp|Q14126|DSG2_HUMAN Desmoglein-2 OS=Homo sapiens GN=DSG2 PE=1 SV=2	4905	cacoP7gpep1.9361.9361.3	controllerType=0 controllerNumber=1 scan=9361	29.7028
12811:3	106	K.IN[+2262.814]ATDADEPNTLNSK.I	HexNAc(5)Hex(5)Fuc(1)NeuAc(1)	N[+2263]	1289.21	3	3865.6	3865.57	0	6.8	181	Specific	542.31	344.77	344.77	6.86	7	>sp|Q14126|DSG2_HUMAN Desmoglein-2 OS=Homo sapiens GN=DSG2 PE=1 SV=2	4905	cacoP7gpep1.11772.11772.3	controllerType=0 controllerNumber=1 scan=11772	38.3938
12797:3	106	K.IN[+2262.814]ATDADEPNTLNSK.I	HexNAc(5)Hex(5)Fuc(1)NeuAc(1)	N[+2263]	1289.21	3	3865.61	3865.57	0	8.4	181	Specific	588.27	414.96	414.96	9.39	7	>sp|Q14126|DSG2_HUMAN Desmoglein-2 OS=Homo sapiens GN=DSG2 PE=1 SV=2	4905	cacoP7gpep1.11763.11763.3	controllerType=0 controllerNumber=1 scan=11763	38.3601
12203:3	107	R.YTGTRPSNLAN[+1702.581]NTILVK.W	HexNAc(2)Hex(8)Fuc(0)NeuAc(0)	N[+1703]	1188.87	3	3564.6	3564.59	0	2.2	334	Specific	183.57	183.57	183.57	3.13	5	>sp|Q9HAW8|UD110_HUMAN UDP-glucuronosyltransferase 1-10 OS=Homo sapiens GN=UGT1A10 PE=1 SV=1	18635	cacoP7gpep1.11314.11314.3	controllerType=0 controllerNumber=1 scan=11314	36.5099
[truncated: 462 more rows]

## Sheet: UndCaco2_gpep
Query #:z	Protein Rank	Peptide < ProteinMetrics Confidential >	Glycans.NHFAGNa	Modification.Types	Observed m/z	z	Observed (M+H)	Calc. mass (M+H)	Off-by-x error	Mass error (ppm)	Starting position	Cleavage	Score	Delta	Delta.Mod	X.Log.Prob.	# of unique peptides	Protein.Name	Protein DB number	Comment	Scan #	Scan Time
[truncated: 1,100 more rows]

[truncated: 1 more sheets: UndCaco2_gpro]
